# Supplementary material for: Unique Amphibole Bearing Mantle Column Beneath the Leningrad Kimberlite Pipe, West Ukukit Field, NE Yakutia
Source: Preprints.org preprint supplement (doi:10.20944/preprints202112.0444.v1), 2021-12-28
Supplement: Supplementary file 1 [file AmfLeningr1.xls]

## Sheet: amfamg
PROBE-AMPH an amphibole structural formula calculator and classifier (with barometers)
For microprobe analyses: i.e. H2O, Fe2O3 and Li2O not analysed
Based on 23 oxygens with Fe2+/Fe3+ estimation assuming Џ13 cations - except for Fe-Mg-Mn amphiboles where Џ15 is applied.
The method cannot distinguish between orthorhombic and monoclinic Fe-Mg-Mn amphiboles.
See Leake, (1978) Miner. Mag.; Rock and Leake, (1984) Miner. Mag. and Mogessie et al., (1990) Computers and Geosciences for classification info.
See Hammarstrom and Zen (1986), Hollister et al. (1987), Johnson and Rutherford (1989) and Schmidt (1992) for geobarometry info.
Input data here	Magnesio Cummingtonite (m) Magnesio Anthophyllite (orh)	Cummingtonite (m) Anthophyllite (orh)	Sodian-Magnesio Cummingtonite (m) Magnesio Gedrite (orh)	Dannemorite	Tirodite	Lgam271	OL5-97	Lgam015	Lgam311	Lgam042	OL5-80	Lgam039	Lgam053	Lgam317	Lgam313	OL5-104	Lgam121	Lgam175	Lgam016	Lgam036	Lgam045	OL5-65	Lgam314	OL5-110	Lgam020	Lgam318	Lgam010	Lgam011	OL5-82	Lgam018	Lgam066	Lgam104	Lgam129	Lgam319	OL5-125	Lgam028	Lgam017	Lgam052	Lgam079	Lgam003	OL5-153	Lgam239	Lgam307	Lgam312	Lgam001	Lgam302	Lgam024	Lgam320	OL5-95
Sample number	M1	M2	M3	M9	M10	A	A	A	A	A	A	A	A	A	A	A	A	A	A	A	A	A	A	A	A	A	A	A	A	A	A	A	A	A	A	A	A	A	A	A	A	A	A	A	A	A	A	A	A
SiO2	60	52.5	49.01	50.6	55.27	58.68	57.7881	57.11	57.05	57.02	56.9589	56.91	56.87	56.86	56.83	56.7775	56.68	56.67	56.65	56.63	56.61	56.6091	56.6	56.5852	56.58	56.58	56.57	56.57	56.562	56.56	56.52	56.52	56.51	56.51	56.4922	56.48	56.47	56.47	56.47	56.46	56.4564	56.42	56.42	56.41	56.4	56.4	56.39	56.39	56.3788
TiO2	0	0	0.2	0	0	0.06	0.2495	0.22	0.07	0.16	0.1594	0.14	0.19	0.05	0.05	0.3379	0.07	0.18	0.25	0.21	0.2	0.2499	0.03	0.1799	0.21	0.06	0.23	0.25	0.1571	0.15	0.24	0.05	0.1	0.05	0.2277	0.23	0.2	0.18	0.2	0.26	0.1908	0.05	0.06	0.06	0.31	0.04	0.17	0.05	0.1748
Al2O3	0.4	4.4	14.91	0.04	0.34	1.24	1.9177	0.35	1.04	0.21	0.2393	0.21	0.75	0.97	0.94	3.0204	1.15	1.39	0.21	0.5	0.37	0.2795	0.99	0.4257	0.44	0.99	0.22	0.54	0.2292	0.43	0.78	1.12	1.07	1	0.5101	0.51	0.23	0.8	0.7	0.44	0.4572	1.11	1.15	0.98	0.35	1.05	0.23	0.95	0.5665
FeO	0.4	20.4	0.55	36.1	4.52	3.01	2.5941	1.42	2.8	1.29	2.0185	2.09	2.05	2.87	2.82	2.8607	2.08	2.32	2.5	2.76	2.26	1.6505	2.89	2.3504	1.87	2.84	2.42	2.27	2.043	2.06	2.23	2.35	2.13	2.87	2.8466	1.74	2.5	1.96	1.97	2.11	2.7799	2.76	2.82	2.85	1.99	2.82	2.06	2.91	2.4894
MnO	0.6	0.3	0	5.8	16.62	0.08	0.0461	0	0.08	0.01	0.0209	0.03	0.02	0.08	0.08	0.0457	0.05	0.05	0.03	0.05	0.03	0.0077	0.08	0.0483	0.02	0.09	0.02	0.03	0.0114	0.03	0.03	0.04	0.02	0.09	0.0345	0.01	0.03	0.03	0.04	0.03	0.0361	0.05	0.08	0.07	0.02	0.08	0.03	0.07	0.0267
MgO	33.4	18	28.62	6.4	19.18	21.28	24.0053	23.94	23.32	22.01	23.399	23.78	23.04	23.61	23.69	22.8275	23.32	22.84	23.38	22.76	23.63	23.818	23.73	23.662	23.36	23.89	23.46	23.09	23.5059	23.35	23.26	23.15	23.5	23.86	23.3173	23.45	23.56	23.43	23.81	23.16	23.2163	23.2	23.68	23.88	23.35	23.81	24.09	23.9	23.4501
CaO	0.2	0.5	0.23	0.4	1.19	6.71	8.7276	6.37	6.41	5.68	5.779	5.99	7.47	6.44	6.49	9.8916	9.09	8.3	5.68	6.56	5.9	6.5249	6.44	6.18	6.73	6.38	5.7	7.27	5.842	7	6.47	6.78	7.24	6.4	6.7879	6.82	5.59	7.49	7.47	6.86	6.7529	6.39	6.47	6.45	6.57	6.39	6.18	6.5	7.0067
Na2O	0.2	0.1	1.46	0.05	0.26	5.19	5.6878	6.05	5.7	5.82	7.115	6.25	5.35	5.76	5.82	4.6383	3.95	4.81	6.12	5.83	6.4	6.0491	5.75	7.0574	5.77	5.81	6.05	4.9	7.1937	5.47	6.14	6.02	5.83	5.83	5.7752	5.09	6.29	5.31	5.48	5.19	6.096	6.23	5.74	5.85	5.35	5.86	5.89	5.81	6.173
K2O	0	0	0	0	0	0.44	0.5553	2.72	0.34	2	1.9166	2.13	1.71	0.32	0.33	0.4504	0.86	0.65	2.66	2.18	1.94	2.9071	0.33	1.4468	2.6	0.32	2.83	2.82	1.8983	2.61	1.39	0.98	0.83	0.32	2.7167	2.33	2.65	1.74	1.15	3.09	2.4883	0.54	0.35	0.34	3.29	0.37	2.45	0.32	2.1981
BaO
SrO
PbO
ZnO
F
Cl
Cr2O3						0.95	0.7976	0.08	0.91	0.2	0.3867	0.25	0.29	0.77	0.67	0.9594	0.5	0.56	0.26	0.26	0.43	0.1186	0.84	0.3569	0.19	0.79	0.27	0.02	0.2357	0.09	0.68	0.73	0.53	0.82	0.0179	0.02	0.25	0.35	0.46	0.15	0.1628	1	0.96	0.82	0.15	0.94	0.24	0.8	0.0983
NiO
Reformatted oxide %	Magnesio Cummingtonite (m) Magnesio Anthophyllite (orh)	Cummingtonite (m) Anthophyllite (orh)	Sodian-Magnesio Cummingtonite (m) Magnesio Gedrite (orh)	Dannemorite	Tirodite	Lgam271	OL5-97	Lgam015	Lgam311	Lgam042	OL5-80	Lgam039	Lgam053	Lgam317	Lgam313	OL5-104	Lgam121	Lgam175	Lgam016	Lgam036	Lgam045	OL5-65	Lgam314	OL5-110	Lgam020	Lgam318	Lgam010	Lgam011	OL5-82	Lgam018	Lgam066	Lgam104	Lgam129	Lgam319	OL5-125	Lgam028	Lgam017	Lgam052	Lgam079	Lgam003	OL5-153	Lgam239	Lgam307	Lgam312	Lgam001	Lgam302	Lgam024	Lgam320	OL5-95
	M1	M2	M3	M9	M10	A	A	A	A	A	A	A	A	A	A	A	A	A	A	A	A	A	A	A	A	A	A	A	A	A	A	A	A	A	A	A	A	A	A	A	A	A	A	A	A	A	A	A	A
SiO2	60	52.5	49.01	50.6	55.27	58.68	57.7881	57.11	57.05	57.02	56.9589	56.91	56.87	56.86	56.83	56.7775	56.68	56.67	56.65	56.63	56.61	56.6091	56.6	56.5852	56.58	56.58	56.57	56.57	56.562	56.56	56.52	56.52	56.51	56.51	56.4922	56.48	56.47	56.47	56.47	56.46	56.4564	56.42	56.42	56.41	56.4	56.4	56.39	56.39	56.3788
TiO2	0	0	0.2	0	0	0.06	0.2495	0.22	0.07	0.16	0.1594	0.14	0.19	0.05	0.05	0.3379	0.07	0.18	0.25	0.21	0.2	0.2499	0.03	0.1799	0.21	0.06	0.23	0.25	0.1571	0.15	0.24	0.05	0.1	0.05	0.2277	0.23	0.2	0.18	0.2	0.26	0.1908	0.05	0.06	0.06	0.31	0.04	0.17	0.05	0.1748
Al2O3	0.4	4.4	14.91	0.04	0.34	1.24	1.9177	0.35	1.04	0.21	0.2393	0.21	0.75	0.97	0.94	3.0204	1.15	1.39	0.21	0.5	0.37	0.2795	0.99	0.4257	0.44	0.99	0.22	0.54	0.2292	0.43	0.78	1.12	1.07	1	0.5101	0.51	0.23	0.8	0.7	0.44	0.4572	1.11	1.15	0.98	0.35	1.05	0.23	0.95	0.5665
Cr2O3	0	0	0	0	0	0.95	0.7976	0.08	0.91	0.2	0.3867	0.25	0.29	0.77	0.67	0.9594	0.5	0.56	0.26	0.26	0.43	0.1186	0.84	0.3569	0.19	0.79	0.27	0.02	0.2357	0.09	0.68	0.73	0.53	0.82	0.0179	0.02	0.25	0.35	0.46	0.15	0.1628	1	0.96	0.82	0.15	0.94	0.24	0.8	0.0983
Fe2O3	0	0	0	1.00516	0	2.48096	2.88282	1.57805	3.11164	0	2.17667	2.32262	1.6339	3.18943	3.13387	1.77223	2.3115	2.57822	2.77825	2.51427	2.51154	1.79986	3.21166	2.612	1.66829	3.15609	2.68935	1.85341	2.27039	1.94209	2.4782	2.61156	2.36707	3.18943	2.86428	1.93366	2.77825	2.17815	2.18926	1.80783	2.18185	3.06719	3.13387	3.16721	2.17672	3.13387	2.28928	3.23388	2.06299
FeO	0.4	20.4	0.55	35.1955	4.52	0.777518	0	0	0	1.29	0.0598329	0	0.579737	0	0	1.26596	0	0	0	0.497539	0	0.0309025	0	0	0.368795	0	0	0.602213	0	0.312417	0	0	0	0	0.269185	0	0	0	0	0.483231	0.816567	0	0	0	0.0312806	0	0	0	0.633021
MnO	0.6	0.3	0	5.8	16.62	0.08	0.0461	0	0.08	0.01	0.0209	0.03	0.02	0.08	0.08	0.0457	0.05	0.05	0.03	0.05	0.03	0.0077	0.08	0.0483	0.02	0.09	0.02	0.03	0.0114	0.03	0.03	0.04	0.02	0.09	0.0345	0.01	0.03	0.03	0.04	0.03	0.0361	0.05	0.08	0.07	0.02	0.08	0.03	0.07	0.0267
MgO	33.4	18	28.62	6.4	19.18	21.28	24.0053	23.94	23.32	22.01	23.399	23.78	23.04	23.61	23.69	22.8275	23.32	22.84	23.38	22.76	23.63	23.818	23.73	23.662	23.36	23.89	23.46	23.09	23.5059	23.35	23.26	23.15	23.5	23.86	23.3173	23.45	23.56	23.43	23.81	23.16	23.2163	23.2	23.68	23.88	23.35	23.81	24.09	23.9	23.4501
NiO	0	0	0	0	0	0	0	0	0	0	0	0	0	0	0	0	0	0	0	0	0	0	0	0	0	0	0	0	0	0	0	0	0	0	0	0	0	0	0	0	0	0	0	0	0	0	0	0	0
ZnO	0	0	0	0	0	0	0	0	0	0	0	0	0	0	0	0	0	0	0	0	0	0	0	0	0	0	0	0	0	0	0	0	0	0	0	0	0	0	0	0	0	0	0	0	0	0	0	0	0
Li2O* (not implemented)
CaO	0.2	0.5	0.23	0.4	1.19	6.71	8.7276	6.37	6.41	5.68	5.779	5.99	7.47	6.44	6.49	9.8916	9.09	8.3	5.68	6.56	5.9	6.5249	6.44	6.18	6.73	6.38	5.7	7.27	5.842	7	6.47	6.78	7.24	6.4	6.7879	6.82	5.59	7.49	7.47	6.86	6.7529	6.39	6.47	6.45	6.57	6.39	6.18	6.5	7.0067
Na2O	0.2	0.1	1.46	0.05	0.26	5.19	5.6878	6.05	5.7	5.82	7.115	6.25	5.35	5.76	5.82	4.6383	3.95	4.81	6.12	5.83	6.4	6.0491	5.75	7.0574	5.77	5.81	6.05	4.9	7.1937	5.47	6.14	6.02	5.83	5.83	5.7752	5.09	6.29	5.31	5.48	5.19	6.096	6.23	5.74	5.85	5.35	5.86	5.89	5.81	6.173
K2O	0	0	0	0	0	0.44	0.5553	2.72	0.34	2	1.9166	2.13	1.71	0.32	0.33	0.4504	0.86	0.65	2.66	2.18	1.94	2.9071	0.33	1.4468	2.6	0.32	2.83	2.82	1.8983	2.61	1.39	0.98	0.83	0.32	2.7167	2.33	2.65	1.74	1.15	3.09	2.4883	0.54	0.35	0.34	3.29	0.37	2.45	0.32	2.1981
BaO	0	0	0	0	0	0	0	0	0	0	0	0	0	0	0	0	0	0	0	0	0	0	0	0	0	0	0	0	0	0	0	0	0	0	0	0	0	0	0	0	0	0	0	0	0	0	0	0	0
SrO	0	0	0	0	0	0	0	0	0	0	0	0	0	0	0	0	0	0	0	0	0	0	0	0	0	0	0	0	0	0	0	0	0	0	0	0	0	0	0	0	0	0	0	0	0	0	0	0	0
PbO	0	0	0	0	0	0	0	0	0	0	0	0	0	0	0	0	0	0	0	0	0	0	0	0	0	0	0	0	0	0	0	0	0	0	0	0	0	0	0	0	0	0	0	0	0	0	0	0	0
F	0	0	0	0	0	0	0	0	0	0	0	0	0	0	0	0	0	0	0	0	0	0	0	0	0	0	0	0	0	0	0	0	0	0	0	0	0	0	0	0	0	0	0	0	0	0	0	0	0
Cl	0	0	0	0	0	0	0	0	0	0	0	0	0	0	0	0	0	0	0	0	0	0	0	0	0	0	0	0	0	0	0	0	0	0	0	0	0	0	0	0	0	0	0	0	0	0	0	0	0
H2O*	2.23906	2.05406	2.2093	1.9134	2.07438	2.19685	2.27604	2.17922	2.1912	2.10924	2.17399	2.17233	2.17283	2.18986	2.18912	2.25602	2.18528	2.18632	2.16523	2.16495	2.17108	2.17074	2.18685	2.18061	2.16377	2.18839	2.16408	2.16248	2.16545	2.16369	2.17525	2.17948	2.18171	2.1875	2.17847	2.15248	2.16417	2.17369	2.1781	2.15909	2.17348	2.18215	2.18663	2.18558	2.16015	2.1862	2.16597	2.18526	2.17546
	97.4391	98.2541	97.1893	101.404	99.4544	100.085	104.934	100.597	100.223	96.5092	100.385	100.185	100.076	100.239	100.223	104.243	100.167	100.215	100.183	100.157	100.193	100.565	100.189	100.735	100.101	100.254	100.203	100.108	100.071	100.108	100.163	100.181	100.179	100.257	101.191	99.0261	100.212	100.152	100.147	100.09	101.029	100.239	100.23	100.213	100.158	100.26	100.125	100.209	100.944
O=F,Cl	0	0	0	0	0	0	0	0	0	0	0	0	0	0	0	0	0	0	0	0	0	0	0	0	0	0	0	0	0	0	0	0	0	0	0	0	0	0	0	0	0	0	0	0	0	0	0	0	0
Total	97.4391	98.2541	97.1893	101.404	99.4544	100.085	104.934	100.597	100.223	96.5092	100.385	100.185	100.076	100.239	100.223	104.243	100.167	100.215	100.183	100.157	100.193	100.565	100.189	100.735	100.101	100.254	100.203	100.108	100.071	100.108	100.163	100.181	100.179	100.257	101.191	99.0261	100.212	100.152	100.147	100.09	101.029	100.239	100.23	100.213	100.158	100.26	100.125	100.209	100.944
No. of oxygens	23	23	23	23	23	23	23	23	23	23	23	23	23	23	23	23	23	23	23	23	23	23	23	23	23	23	23	23	23	23	23	23	23	23	23	23	23	23	23	23	23	23	23	23	23	23	23	23	23
Structural formulae
Si	8.03496	7.66378	6.65161	7.92944	7.98909	8.00915	7.61301	7.85793	7.80677	8.10585	7.85601	7.85524	7.84791	7.78551	7.78404	7.54623	7.77714	7.77207	7.845	7.84323	7.81834	7.81943	7.76058	7.78075	7.84059	7.7524	7.83808	7.84389	7.83203	7.83812	7.79093	7.77584	7.7665	7.74595	7.77559	7.86779	7.82391	7.78965	7.77387	7.84093	7.78851	7.75258	7.73668	7.73902	7.82875	7.73548	7.80634	7.73741	7.77072
Al iv	0	0.336224	1.34839	0.00738775	0.010907	0	0.297755	0.0567576	0.16773	0	0.0388994	0.0341626	0.121981	0.156535	0.151745	0.453773	0.185972	0.224677	0.0342746	0.0816167	0.0602259	0.0455021	0.159983	0.0689894	0.0718619	0.159871	0.0359258	0.0882469	0.0374046	0.0702314	0.126719	0.181603	0.173318	0.161551	0.0827486	0.0837314	0.0375573	0.130062	0.113574	0.0720178	0.0743374	0.179761	0.185857	0.158459	0.0572588	0.16973	0.0375261	0.153631	0.092025
Al vi	0.0631324	0.420777	1.03656	0	0.0470155	0.19947	0	0	0	0.0351845	0	0	0	0	0	0.019355	0	0	0	0	0	0	0	0	0	0	0	0	0	0	0	0	0	0	0	0	0	0	0	0	0	0	0	0	0	0	0	0	0
Ti	0	0	0.0204174	0	0	0.00615995	0.0247239	0.0227692	0.00720516	0.0171089	0.0165371	0.0145355	0.0197221	0.00514967	0.00515142	0.0337809	0.00722466	0.0185689	0.0260413	0.0218775	0.0207769	0.0259648	0.00309406	0.0186071	0.0218894	0.00618378	0.0239707	0.0260744	0.0163627	0.0156359	0.0248844	0.00517422	0.0103378	0.00515524	0.0235742	0.0240999	0.0208433	0.0186768	0.02071	0.02716	0.0197993	0.00516788	0.00618874	0.00619171	0.0323672	0.00412665	0.0177021	0.00516052	0.0181224
Cr	0	0	0	0	0	0.102517	0.0830765	0.00870284	0.0984539	0.022479	0.0421687	0.0272826	0.0316406	0.0833578	0.0725567	0.100816	0.054242	0.0607221	0.028467	0.0284706	0.0469532	0.0129524	0.091061	0.0388008	0.0208168	0.0855807	0.0295776	0.00219256	0.0258039	0.00986098	0.0741091	0.0794042	0.0575906	0.0888667	0.00194793	0.00220274	0.0273855	0.0381719	0.0500672	0.01647	0.0177571	0.10864	0.10408	0.0889445	0.0164619	0.101932	0.0262683	0.0867879	0.0107121
Fe3+	0	0	0	0.118537	0	0.254824	0.285799	0.163396	0.320428	0	0.225921	0.241253	0.169677	0.328638	0.323022	0.177255	0.238676	0.266089	0.289527	0.262051	0.261027	0.187091	0.331384	0.270281	0.173973	0.325423	0.280411	0.193393	0.236578	0.202533	0.257068	0.270377	0.244814	0.328994	0.296678	0.202704	0.289669	0.226106	0.226799	0.188933	0.226512	0.31716	0.32339	0.326987	0.227375	0.323454	0.238489	0.33392	0.213978
Fe2+	0.0447969	2.4904	0.0624253	4.61249	0.54639	0.0887488	0	0	0	0.153362	0.00690139	0	0.0669049	0	0	0.140712	0	0	0	0.0576278	0	0.00356976	0	0	0.0427392	0	0	0.0698315	0	0.036207	0	0	0	0	0.030985	0	0	0	0	0.0561225	0.0942082	0	0	0	0.00363115	0	0	0	0.0729658
Mn	0.0680565	0.0370929	0	0.769849	2.03481	0.00924851	0.00514404	0	0.00927239	0.00120409	0.00244159	0.00350734	0.00233769	0.00927803	0.00928118	0.00514465	0.00581093	0.00580817	0.00351884	0.00586549	0.00350936	0.000900877	0.00929081	0.00562537	0.00234748	0.0104448	0.00234714	0.00352332	0.00133703	0.00352135	0.00350263	0.00466113	0.00232818	0.0104491	0.00402207	0.0011799	0.00352057	0.00350515	0.00466407	0.00352885	0.00421827	0.00581928	0.00929174	0.00813417	0.00235142	0.00929359	0.00351765	0.00813537	0.00311704
Mg	6.66787	3.9171	5.79055	1.49514	4.133	4.32988	4.71448	4.91053	4.75722	4.66445	4.81112	4.89318	4.73982	4.81931	4.83728	4.52294	4.7701	4.66969	4.82665	4.69926	4.86512	4.90459	4.85047	4.85041	4.82578	4.87976	4.84574	4.77285	4.85216	4.82389	4.77975	4.74793	4.81478	4.87561	4.78445	4.86978	4.8662	4.81816	4.88638	4.79484	4.77466	4.75236	4.84074	4.88397	4.8318	4.86828	4.97154	4.88878	4.81836
Ni	0	0	0	0	0	0	0	0	0	0	0	0	0	0	0	0	0	0	0	0	0	0	0	0	0	0	0	0	0	0	0	0	0	0	0	0	0	0	0	0	0	0	0	0	0	0	0	0	0
Zn	0	0	0	0	0	0	0	0	0	0	0	0	0	0	0	0	0	0	0	0	0	0	0	0	0	0	0	0	0	0	0	0	0	0	0	0	0	0	0	0	0	0	0	0	0	0	0	0	0
Li* (not implemented)	0	0	0	0	0	0	0	0	0	0	0	0	0	0	0	0	0	0	0	0	0	0	0	0	0	0	0	0	0	0	0	0	0	0	0	0	0	0	0	0	0	0	0	0	0	0	0	0	0
Ca	0.0286959	0.0782008	0.0334447	0.0671599	0.184295	0.981242	1.23189	0.939059	0.939792	0.865122	0.853986	0.88584	1.10446	0.944764	0.952423	1.40857	1.33632	1.21961	0.842751	0.973442	0.873033	0.965651	0.946066	0.910468	0.999214	0.936595	0.846167	1.08003	0.8667	1.03934	0.955541	0.999384	1.0661	0.939912	1.00101	1.01789	0.829804	1.10698	1.10179	1.02072	0.998134	0.940744	0.950568	0.948085	0.977095	0.939002	0.916624	0.955575	1.03471
Na	0.0519302	0.0283036	0.384196	0.0151922	0.0728684	1.37348	1.45285	1.61402	1.51234	1.60418	1.90271	1.67266	1.43147	1.52919	1.54564	1.19528	1.05086	1.27905	1.64324	1.56558	1.71379	1.62008	1.52863	1.88157	1.55031	1.5435	1.62531	1.31734	1.93134	1.46976	1.64102	1.60583	1.55355	1.54944	1.54124	1.37478	1.68972	1.42021	1.46271	1.3975	1.63059	1.65981	1.52613	1.55612	1.43988	1.55834	1.58095	1.54571	1.64968
K	0	0	0	0	0	0.0766139	0.0933263	0.477445	0.0593545	0.36271	0.337233	0.375067	0.301041	0.055897	0.0576633	0.0763678	0.150538	0.113725	0.46993	0.38518	0.341807	0.51228	0.0577232	0.253796	0.45964	0.0559348	0.500229	0.49883	0.33533	0.461425	0.244433	0.172001	0.145525	0.0559575	0.47703	0.414069	0.468393	0.306202	0.201965	0.547449	0.437928	0.0946598	0.0612277	0.0595069	0.582597	0.0647393	0.432683	0.0560147	0.386502
Ba	0	0	0	0	0	0	0	0	0	0	0	0	0	0	0	0	0	0	0	0	0	0	0	0	0	0	0	0	0	0	0	0	0	0	0	0	0	0	0	0	0	0	0	0	0	0	0	0	0
Sr	0	0	0	0	0	0	0	0	0	0	0	0	0	0	0	0	0	0	0	0	0	0	0	0	0	0	0	0	0	0	0	0	0	0	0	0	0	0	0	0	0	0	0	0	0	0	0	0	0
Pb	0	0	0	0	0	0	0	0	0	0	0	0	0	0	0	0	0	0	0	0	0	0	0	0	0	0	0	0	0	0	0	0	0	0	0	0	0	0	0	0	0	0	0	0	0	0	0	0	0
F	0	0	0	0	0	0	0	0	0	0	0	0	0	0	0	0	0	0	0	0	0	0	0	0	0	0	0	0	0	0	0	0	0	0	0	0	0	0	0	0	0	0	0	0	0	0	0	0	0
Cl	0	0	0	0	0	0	0	0	0	0	0	0	0	0	0	0	0	0	0	0	0	0	0	0	0	0	0	0	0	0	0	0	0	0	0	0	0	0	0	0	0	0	0	0	0	0	0	0	0
OH*	2	2	2	2	2	2	2	2	2	2	2	2	2	2	2	2	2	2	2	2	2	2	2	2	2	2	2	2	2	2	2	2	2	2	2	2	2	2	2	2	2	2	2	2	2	2	2	2	2
Total	16.9594	16.9719	17.3276	17.0152	17.0184	17.4313	17.802	18.0506	17.6786	17.8316	18.0939	18.0027	17.837	17.7176	17.7388	17.6802	17.5769	17.63	18.0094	17.9242	18.0046	18.098	17.7383	18.0793	18.0092	17.7557	18.0278	17.8962	18.1351	17.9705	17.898	17.8422	17.8348	17.7619	18.0193	17.8582	18.057	17.8577	17.8425	17.9657	18.0666	17.8167	17.7441	17.7754	17.9996	17.7744	18.0316	17.7711	18.0709
Calculation scheme	Џ15	Џ15	Џ15	Џ15	Џ15	Џ13	Џ13	Џ13	Џ13	Џ13	Џ13	Џ13	Џ13	Џ13	Џ13	Џ13	Џ13	Џ13	Џ13	Џ13	Џ13	Џ13	Џ13	Џ13	Џ13	Џ13	Џ13	Џ13	Џ13	Џ13	Џ13	Џ13	Џ13	Џ13	Џ13	Џ13	Џ13	Џ13	Џ13	Џ13	Џ13	Џ13	Џ13	Џ13	Џ13	Џ13	Џ13	Џ13	Џ13
Amphibole group	Fe-Mg-Mn	Fe-Mg-Mn	Fe-Mg-Mn	Fe-Mg-Mn	Fe-Mg-Mn	Na-Ca	Na-Ca	Na-Ca	Na-Ca	Na-Ca	Na-Ca	Na-Ca	Na-Ca	Na-Ca	Na-Ca	Ca	Ca	Na-Ca	Na-Ca	Na-Ca	Na-Ca	Na-Ca	Na-Ca	Na-Ca	Na-Ca	Na-Ca	Na-Ca	Na-Ca	Na-Ca	Na-Ca	Na-Ca	Na-Ca	Na-Ca	Na-Ca	Na-Ca	Na-Ca	Na-Ca	Na-Ca	Na-Ca	Na-Ca	Na-Ca	Na-Ca	Na-Ca	Na-Ca	Na-Ca	Na-Ca	Na-Ca	Na-Ca	Na-Ca
(Ca+Na) (B)	0.0806261	0.106504	0.0905643	0.0685444	0.239638	2	1.97602	2.03052	1.83292	2	2.09393	1.93357	2	1.81223	1.81693	2	1.96083	1.98237	1.95593	2	1.92864	2.09801	1.79413	2.04584	2.00917	1.78034	1.97171	2	2.13337	2	1.94303	1.93501	1.93033	1.78343	2.01928	1.94852	1.98792	1.97568	1.92393	2	2.06665	1.87851	1.79378	1.7883	2	1.7877	1.93026	1.78618	2.07089
Na (B)	0.0519302	0.0283036	0.0571196	0.00138451	0.0553438	1.01876	0.744133	1.09146	0.893129	1.13488	1.23994	1.04773	0.895542	0.867463	0.864504	0.591432	0.624511	0.762769	1.11317	1.02656	1.0556	1.13236	0.848067	1.13537	1.00995	0.843743	1.12554	0.919966	1.26667	0.960659	0.98749	0.935621	0.864237	0.843514	1.01827	0.930629	1.15811	0.868698	0.82214	0.979276	1.06851	0.937764	0.843208	0.840217	1.02291	0.848702	1.01363	0.830603	1.03618
(Na+K) (A)	0	0	0.327076	0.0138077	0.0175246	0.431333	0.80204	1	0.678562	0.83201	1	1	0.83697	0.717619	0.738798	0.680217	0.576888	0.630002	1	0.9242	1	1	0.738289	1	1	0.755694	1	0.896207	1	0.970529	0.897961	0.842208	0.834841	0.761887	1	0.858219	1	0.857712	0.842533	0.965673	1	0.816708	0.744148	0.77541	0.999567	0.774381	1	0.771119	1
Mg/(Mg+Fe2)	0.993327	0.61133	0.989334	0.244798	0.883235	0.979915	1	1	1	0.968168	0.998568	1	0.986081	1	1	0.969828	1	1	1	0.987885	1	0.999273	1	1	0.991221	1	1	0.98558	1	0.99255	1	1	1	1	0.993565	1	1	1	1	0.988431	0.980651	1	1	1	0.999249	1	1	1	0.985083
Fe3/(Fe3+Alvi)	0	0	0	1	0	0.560923	1	1	1	0	1	1	1	1	1	0.901556	1	1	1	1	1	1	1	1	1	1	1	1	1	1	1	1	1	1	1	1	1	1	1	1	1	1	1	1	1	1	1	1	1
Sum of S2	14.8788	14.8654	14.91	14.9328	14.7612	13	13.024	13.0201	13.1671	12.9996	13	13.0692	13	13.1878	13.1831	13	13.0392	13.0176	13.0535	13	13.0759	13	13.2059	13.0335	13	13.2197	13.0561	13	13.0017	13	13.057	13.065	13.0697	13.2166	13	13.0515	13.0691	13.0243	13.0761	13	13	13.1215	13.2062	13.2117	13	13.2123	13.1014	13.2138	13
Amphibole names
								potassian-		potassian-	potassian-	potassian-	potassian-			subcalcic sodian	subcalcic sodian		potassian-	potassian-	potassian-	potassium-		potassian-	potassian-		potassium-	potassian-	potassian-	potassian-					potassian-	potassian-	potassian-	potassian-		potassium-	potassian-				potassium-		potassian-		potassian-
	magnesio-anthophyllite	anthophyllite	magnesio-gedrite	dannemoreite	tirodite	winchite	richterite	richterite	richterite	richterite	richterite	richterite	richterite	richterite	richterite	silicic edenite	silicic edenite	richterite	richterite	richterite	richterite	richterite	richterite	richterite	richterite	richterite	richterite	richterite	richterite	richterite	richterite	richterite	richterite	richterite	richterite	richterite	richterite	richterite	richterite	richterite	richterite	richterite	richterite	richterite	richterite	richterite	richterite	richterite	richterite
Alternative name ?
(monoclinic alternative)			sodian
	magnesio-cummingtonite	cummingtonite	magnesio-cummingtonite
P (kbars)	not valid	not valid	not valid	not valid	not valid	not valid	not valid	not valid	not valid	not valid	not valid	not valid	not valid	not valid	not valid	not valid	not valid	not valid	not valid	not valid	not valid	not valid	not valid	not valid	not valid	not valid	not valid	not valid	not valid	not valid	not valid	not valid	not valid	not valid	not valid	not valid	not valid	not valid	not valid	not valid	not valid	not valid	not valid	not valid	not valid	not valid	not valid	not valid	not valid
Hammarstrom and Zen 86
Hollister et al. 87
Johnson & Rutherford 89
Schmidt 92
Barometers are only valid for certain calcic amphiboles
Hidden calculations	•	•	•	•	•	•	•	•	•	•	•	•	•	•	•	•	•	•	•	•	•	•	•	•	•	•	•	•	•	•	•	•	•	•	•	•	•	•	•	•	•	•	•	•	•	•	•	•	•
Part 1. Anion proportions	raw anions	raw anions	raw anions	raw anions	raw anions	raw anions	raw anions	raw anions	raw anions	raw anions	raw anions	raw anions	raw anions	raw anions	raw anions	raw anions	raw anions	raw anions	raw anions	raw anions	raw anions	raw anions	raw anions	raw anions	raw anions	raw anions	raw anions	raw anions	raw anions	raw anions	raw anions	raw anions	raw anions	raw anions	raw anions	raw anions	raw anions	raw anions	raw anions	raw anions	raw anions	raw anions	raw anions	raw anions	raw anions	raw anions	raw anions	raw anions	raw anions
Si	1.99719	1.74754	1.63137	1.6843	1.83975	1.95326	1.92357	1.901	1.899	1.898	1.89597	1.89434	1.89301	1.89267	1.89168	1.88993	1.88668	1.88635	1.88568	1.88502	1.88435	1.88432	1.88402	1.88353	1.88335	1.88335	1.88302	1.88302	1.88275	1.88269	1.88136	1.88136	1.88102	1.88102	1.88043	1.88003	1.87969	1.87969	1.87969	1.87936	1.87924	1.87803	1.87803	1.8777	1.87736	1.87736	1.87703	1.87703	1.87666
Ti	0	0	0.00500759	0	0	0.00150228	0.00624696	0.00550835	0.00175266	0.00400607	0.00399105	0.00350531	0.00475721	0.0012519	0.0012519	0.00846032	0.00175266	0.00450683	0.00625948	0.00525797	0.00500759	0.00625698	0.000751138	0.00450432	0.00525797	0.00150228	0.00575872	0.00625948	0.00393346	0.00375569	0.0060091	0.0012519	0.00250379	0.0012519	0.00570114	0.00575872	0.00500759	0.00450683	0.00500759	0.00650986	0.00477724	0.0012519	0.00150228	0.00150228	0.00776176	0.00100152	0.00425645	0.0012519	0.00437663
Al	0.0117693	0.129462	0.438701	0.00117693	0.0100039	0.0364848	0.056425	0.0102981	0.0306002	0.00617888	0.00704098	0.00617888	0.0220674	0.0285405	0.0276579	0.08887	0.0338367	0.0408983	0.00617888	0.0147116	0.0108866	0.0082238	0.029129	0.0125255	0.0129462	0.029129	0.00647311	0.0158886	0.00674381	0.012652	0.0229501	0.032954	0.0314829	0.0294232	0.0150088	0.0150059	0.00676735	0.0235386	0.0205963	0.0129462	0.0134523	0.0326598	0.0338367	0.0288348	0.0102981	0.0308944	0.00676735	0.0279521	0.0166683
Cr	0	0	0	0	0	0.0187512	0.0157431	0.00157905	0.0179617	0.00394762	0.00763273	0.00493453	0.00572405	0.0151983	0.0132245	0.0189367	0.00986906	0.0110533	0.00513191	0.00513191	0.00848739	0.00234094	0.01658	0.00704453	0.00375024	0.0155931	0.00532929	0.000394762	0.00465227	0.00177643	0.0134219	0.0144088	0.0104612	0.0161853	0.000353312	0.000394762	0.00493453	0.00690834	0.00907953	0.00296072	0.00321337	0.0197381	0.0189486	0.0161853	0.00296072	0.0185538	0.00473715	0.0157905	0.00194026
Fe3+	0	0	0	0	0	0	0	0	0	0	0	0	0	0	0	0	0	0	0	0	0	0	0	0	0	0	0	0	0	0	0	0	0	0	0	0	0	0	0	0	0	0	0	0	0	0	0	0	0
Fe2+	0.00556743	0.283939	0.00765522	0.502461	0.062912	0.0418949	0.0361062	0.0197644	0.038972	0.017955	0.0280947	0.0290898	0.0285331	0.0399463	0.0392504	0.0398169	0.0289507	0.0322911	0.0347965	0.0384153	0.031456	0.0229726	0.0402247	0.0327142	0.0260277	0.0395288	0.033683	0.0315952	0.0284357	0.0286723	0.0310384	0.0327087	0.0296466	0.0399463	0.0396206	0.0242183	0.0347965	0.0272804	0.0274196	0.0293682	0.0386923	0.0384153	0.0392504	0.039668	0.027698	0.0392504	0.0286723	0.0405031	0.0346489
Mn	0.00845816	0.00422908	0	0.0817622	0.234291	0.00112775	0.000649869	0	0.00112775	0.000140969	0.000294626	0.000422908	0.000281939	0.00112775	0.00112775	0.00064423	0.000704847	0.000704847	0.000422908	0.000704847	0.000422908	0.000108546	0.00112775	0.000680882	0.000281939	0.00126872	0.000281939	0.000422908	0.000160705	0.000422908	0.000422908	0.000563877	0.000281939	0.00126872	0.000486344	0.000140969	0.000422908	0.000422908	0.000563877	0.000422908	0.000508899	0.000704847	0.00112775	0.000986786	0.000281939	0.00112775	0.000422908	0.000986786	0.000376388
Mg	0.828694	0.446601	0.710096	0.158792	0.475879	0.527982	0.5956	0.59398	0.578597	0.546094	0.580557	0.59001	0.57165	0.585792	0.587777	0.566377	0.578597	0.566688	0.580086	0.564703	0.586288	0.590953	0.588769	0.587082	0.579589	0.592739	0.58207	0.57289	0.583209	0.579341	0.577108	0.574379	0.583063	0.591995	0.57853	0.581822	0.584552	0.581326	0.590754	0.574627	0.576024	0.57562	0.587529	0.592491	0.579341	0.590754	0.597701	0.592987	0.581825
Ni	0	0	0	0	0	0	0	0	0	0	0	0	0	0	0	0	0	0	0	0	0	0	0	0	0	0	0	0	0	0	0	0	0	0	0	0	0	0	0	0	0	0	0	0	0	0	0	0	0
Zn	0	0	0	0	0	0	0	0	0	0	0	0	0	0	0	0	0	0	0	0	0	0	0	0	0	0	0	0	0	0	0	0	0	0	0	0	0	0	0	0	0	0	0	0	0	0	0	0	0
Li	0	0	0	0	0	0	0	0	0	0	0	0	0	0	0	0	0	0	0	0	0	0	0	0	0	0	0	0	0	0	0	0	0	0	0	0	0	0	0	0	0	0	0	0	0	0	0	0	0
Ca	0.00356637	0.00891593	0.00410133	0.00713274	0.0212199	0.119652	0.155629	0.113589	0.114302	0.101285	0.10305	0.106813	0.133204	0.114837	0.115729	0.176386	0.162092	0.148004	0.101285	0.116977	0.105208	0.116351	0.114837	0.110201	0.120008	0.113767	0.101642	0.129638	0.104174	0.124823	0.115372	0.1209	0.129103	0.114124	0.121041	0.121613	0.0996801	0.133561	0.133204	0.122327	0.120417	0.113946	0.115372	0.115015	0.117155	0.113946	0.110201	0.115907	0.124942
Na	0.00322698	0.00161349	0.023557	0.000806746	0.00419508	0.0837402	0.0917722	0.0976162	0.091969	0.0939052	0.1148	0.100843	0.0863218	0.0929371	0.0939052	0.0748386	0.0637329	0.0776089	0.0987457	0.0940665	0.103263	0.0976017	0.0927758	0.113871	0.0930985	0.0937438	0.0976162	0.0790611	0.11607	0.088258	0.0990684	0.0971322	0.0940665	0.0940665	0.0931824	0.0821267	0.101489	0.0856764	0.0884193	0.0837402	0.0983584	0.100521	0.0926144	0.0943892	0.0863218	0.0945506	0.0950346	0.0937438	0.0996008
K	0	0	0	0	0	0.00467111	0.00589515	0.028876	0.0036095	0.0212323	0.0203469	0.0226124	0.0181536	0.00339717	0.00350333	0.00478152	0.0091299	0.00690051	0.028239	0.0231432	0.0205954	0.0308622	0.00350333	0.0153595	0.027602	0.00339717	0.0300437	0.0299376	0.0201527	0.0277082	0.0147565	0.0104038	0.00881141	0.00339717	0.0288409	0.0247357	0.0281328	0.0184721	0.0122086	0.0328039	0.0264162	0.00573273	0.00371566	0.0036095	0.0349272	0.00392798	0.0260096	0.00339717	0.0233354
Ba	0	0	0	0	0	0	0	0	0	0	0	0	0	0	0	0	0	0	0	0	0	0	0	0	0	0	0	0	0	0	0	0	0	0	0	0	0	0	0	0	0	0	0	0	0	0	0	0	0
Sr	0	0	0	0	0	0	0	0	0	0	0	0	0	0	0	0	0	0	0	0	0	0	0	0	0	0	0	0	0	0	0	0	0	0	0	0	0	0	0	0	0	0	0	0	0	0	0	0	0
Pb	0	0	0	0	0	0	0	0	0	0	0	0	0	0	0	0	0	0	0	0	0	0	0	0	0	0	0	0	0	0	0	0	0	0	0	0	0	0	0	0	0	0	0	0	0	0	0	0	0
F	0	0	0	0	0	0	0	0	0	0	0	0	0	0	0	0	0	0	0	0	0	0	0	0	0	0	0	0	0	0	0	0	0	0	0	0	0	0	0	0	0	0	0	0	0	0	0	0	0
Cl	0	0	0	0	0	0	0	0	0	0	0	0	0	0	0	0	0	0	0	0	0	0	0	0	0	0	0	0	0	0	0	0	0	0	0	0	0	0	0	0	0	0	0	0	0	0	0	0	0
Total-F-Cl	2.85848	2.62231	2.82049	2.43643	2.64825	2.78906	2.88764	2.77221	2.77789	2.69275	2.76177	2.75875	2.7637	2.7757	2.7751	2.86904	2.77535	2.77501	2.74683	2.74813	2.75597	2.75999	2.77172	2.76751	2.75192	2.77402	2.74592	2.74911	2.75029	2.7501	2.7615	2.76606	2.77044	2.77268	2.7632	2.73584	2.74547	2.76138	2.76695	2.74507	2.7611	2.76662	2.77192	2.77038	2.74411	2.77137	2.75083	2.76955	2.76437
Part 2. Cation proportions	raw cations	raw cations	raw cations	raw cations	raw cations	raw cations	raw cations	raw cations	raw cations	raw cations	raw cations	raw cations	raw cations	raw cations	raw cations	raw cations	raw cations	raw cations	raw cations	raw cations	raw cations	raw cations	raw cations	raw cations	raw cations	raw cations	raw cations	raw cations	raw cations	raw cations	raw cations	raw cations	raw cations	raw cations	raw cations	raw cations	raw cations	raw cations	raw cations	raw cations	raw cations	raw cations	raw cations	raw cations	raw cations	raw cations	raw cations	raw cations	raw cations
Si	0.998597	0.873772	0.815687	0.84215	0.919874	0.976628	0.961784	0.950498	0.949499	0.949	0.947983	0.947169	0.946503	0.946337	0.945838	0.944964	0.943341	0.943175	0.942842	0.942509	0.942176	0.942161	0.94201	0.941763	0.941677	0.941677	0.941511	0.941511	0.941377	0.941344	0.940678	0.940678	0.940512	0.940512	0.940216	0.940013	0.939846	0.939846	0.939846	0.93968	0.93962	0.939014	0.939014	0.938848	0.938681	0.938681	0.938515	0.938515	0.938328
Ti	0	0	0.00250379	0	0	0.000751138	0.00312348	0.00275417	0.000876328	0.00200303	0.00199552	0.00175266	0.0023786	0.000625948	0.000625948	0.00423016	0.000876328	0.00225341	0.00312974	0.00262898	0.00250379	0.00312849	0.000375569	0.00225216	0.00262898	0.000751138	0.00287936	0.00312974	0.00196673	0.00187784	0.00300455	0.000625948	0.0012519	0.000625948	0.00285057	0.00287936	0.00250379	0.00225341	0.00250379	0.00325493	0.00238862	0.000625948	0.000751138	0.000751138	0.00388088	0.000500759	0.00212822	0.000625948	0.00218832
Al	0.0078462	0.0863082	0.292467	0.00078462	0.00666927	0.0243232	0.0376166	0.00686542	0.0204001	0.00411925	0.00469399	0.00411925	0.0147116	0.019027	0.0184386	0.0592466	0.0225578	0.0272655	0.00411925	0.00980775	0.00725773	0.00548253	0.0194193	0.00835032	0.00863082	0.0194193	0.00431541	0.0105924	0.00449587	0.00843466	0.0153001	0.0219694	0.0209886	0.0196155	0.0100059	0.0100039	0.00451156	0.0156924	0.0137308	0.00863082	0.00896821	0.0217732	0.0225578	0.0192232	0.00686542	0.0205963	0.00451156	0.0186347	0.0111122
Cr	0	0	0	0	0	0.0125008	0.0104954	0.0010527	0.0119745	0.00263175	0.00508849	0.00328969	0.00381604	0.0101322	0.00881636	0.0126245	0.00657937	0.0073689	0.00342127	0.00342127	0.00565826	0.00156063	0.0110533	0.00469636	0.00250016	0.0103954	0.00355286	0.000263175	0.00310152	0.00118429	0.00894795	0.00960588	0.00697413	0.0107902	0.000235542	0.000263175	0.00328969	0.00460556	0.00605302	0.00197381	0.00214224	0.0131587	0.0126324	0.0107902	0.00197381	0.0123692	0.0031581	0.010527	0.0012935
Fe3+	0	0	0	0	0	0	0	0	0	0	0	0	0	0	0	0	0	0	0	0	0	0	0	0	0	0	0	0	0	0	0	0	0	0	0	0	0	0	0	0	0	0	0	0	0	0	0	0	0
Fe2+	0.00556743	0.283939	0.00765522	0.502461	0.062912	0.0418949	0.0361062	0.0197644	0.038972	0.017955	0.0280947	0.0290898	0.0285331	0.0399463	0.0392504	0.0398169	0.0289507	0.0322911	0.0347965	0.0384153	0.031456	0.0229726	0.0402247	0.0327142	0.0260277	0.0395288	0.033683	0.0315952	0.0284357	0.0286723	0.0310384	0.0327087	0.0296466	0.0399463	0.0396206	0.0242183	0.0347965	0.0272804	0.0274196	0.0293682	0.0386923	0.0384153	0.0392504	0.039668	0.027698	0.0392504	0.0286723	0.0405031	0.0346489
Mn	0.00845816	0.00422908	0	0.0817622	0.234291	0.00112775	0.000649869	0	0.00112775	0.000140969	0.000294626	0.000422908	0.000281939	0.00112775	0.00112775	0.00064423	0.000704847	0.000704847	0.000422908	0.000704847	0.000422908	0.000108546	0.00112775	0.000680882	0.000281939	0.00126872	0.000281939	0.000422908	0.000160705	0.000422908	0.000422908	0.000563877	0.000281939	0.00126872	0.000486344	0.000140969	0.000422908	0.000422908	0.000563877	0.000422908	0.000508899	0.000704847	0.00112775	0.000986786	0.000281939	0.00112775	0.000422908	0.000986786	0.000376388
Mg	0.828694	0.446601	0.710096	0.158792	0.475879	0.527982	0.5956	0.59398	0.578597	0.546094	0.580557	0.59001	0.57165	0.585792	0.587777	0.566377	0.578597	0.566688	0.580086	0.564703	0.586288	0.590953	0.588769	0.587082	0.579589	0.592739	0.58207	0.57289	0.583209	0.579341	0.577108	0.574379	0.583063	0.591995	0.57853	0.581822	0.584552	0.581326	0.590754	0.574627	0.576024	0.57562	0.587529	0.592491	0.579341	0.590754	0.597701	0.592987	0.581825
Ni	0	0	0	0	0	0	0	0	0	0	0	0	0	0	0	0	0	0	0	0	0	0	0	0	0	0	0	0	0	0	0	0	0	0	0	0	0	0	0	0	0	0	0	0	0	0	0	0	0
Zn	0	0	0	0	0	0	0	0	0	0	0	0	0	0	0	0	0	0	0	0	0	0	0	0	0	0	0	0	0	0	0	0	0	0	0	0	0	0	0	0	0	0	0	0	0	0	0	0	0
Li	0	0	0	0	0	0	0	0	0	0	0	0	0	0	0	0	0	0	0	0	0	0	0	0	0	0	0	0	0	0	0	0	0	0	0	0	0	0	0	0	0	0	0	0	0	0	0	0	0
Ca	0.00356637	0.00891593	0.00410133	0.00713274	0.0212199	0.119652	0.155629	0.113589	0.114302	0.101285	0.10305	0.106813	0.133204	0.114837	0.115729	0.176386	0.162092	0.148004	0.101285	0.116977	0.105208	0.116351	0.114837	0.110201	0.120008	0.113767	0.101642	0.129638	0.104174	0.124823	0.115372	0.1209	0.129103	0.114124	0.121041	0.121613	0.0996801	0.133561	0.133204	0.122327	0.120417	0.113946	0.115372	0.115015	0.117155	0.113946	0.110201	0.115907	0.124942
Na	0.00645397	0.00322698	0.0471139	0.00161349	0.00839016	0.16748	0.183544	0.195232	0.183938	0.18781	0.2296	0.201686	0.172644	0.185874	0.18781	0.149677	0.127466	0.155218	0.197491	0.188133	0.206527	0.195203	0.185552	0.227741	0.186197	0.187488	0.195232	0.158122	0.232139	0.176516	0.198137	0.194264	0.188133	0.188133	0.186365	0.164253	0.202977	0.171353	0.176839	0.16748	0.196717	0.201041	0.185229	0.188778	0.172644	0.189101	0.190069	0.187488	0.199202
K	0	0	0	0	0	0.00934222	0.0117903	0.0577519	0.00721899	0.0424646	0.0406939	0.0452249	0.0363073	0.00679434	0.00700667	0.00956304	0.0182598	0.013801	0.056478	0.0462865	0.0411907	0.0617245	0.00700667	0.0307189	0.055204	0.00679434	0.0600875	0.0598752	0.0403053	0.0554164	0.0295129	0.0208077	0.0176228	0.00679434	0.0576819	0.0494713	0.0562657	0.0369442	0.0244172	0.0656079	0.0528324	0.0114655	0.00743131	0.00721899	0.0698543	0.00785596	0.0520192	0.00679434	0.0466708
Ba	0	0	0	0	0	0	0	0	0	0	0	0	0	0	0	0	0	0	0	0	0	0	0	0	0	0	0	0	0	0	0	0	0	0	0	0	0	0	0	0	0	0	0	0	0	0	0	0	0
Sr	0	0	0	0	0	0	0	0	0	0	0	0	0	0	0	0	0	0	0	0	0	0	0	0	0	0	0	0	0	0	0	0	0	0	0	0	0	0	0	0	0	0	0	0	0	0	0	0	0
Pb	0	0	0	0	0	0	0	0	0	0	0	0	0	0	0	0	0	0	0	0	0	0	0	0	0	0	0	0	0	0	0	0	0	0	0	0	0	0	0	0	0	0	0	0	0	0	0	0	0
F	0	0	0	0	0	0	0	0	0	0	0	0	0	0	0	0	0	0	0	0	0	0	0	0	0	0	0	0	0	0	0	0	0	0	0	0	0	0	0	0	0	0	0	0	0	0	0	0	0
Cl	0	0	0	0	0	0	0	0	0	0	0	0	0	0	0	0	0	0	0	0	0	0	0	0	0	0	0	0	0	0	0	0	0	0	0	0	0	0	0	0	0	0	0	0	0	0	0	0	0
Total	1.85918	1.70699	1.87962	1.5947	1.72924	1.88168	1.99634	1.94149	1.90691	1.8535	1.94205	1.92958	1.91003	1.91049	1.91242	1.96353	1.88942	1.89677	1.92407	1.91359	1.92869	1.93965	1.91038	1.9462	1.92275	1.91383	1.92526	1.90804	1.93937	1.91803	1.91952	1.9165	1.91758	1.9138	1.93703	1.89468	1.92885	1.91328	1.91533	1.91337	1.93831	1.91576	1.91089	1.91377	1.91838	1.91418	1.9274	1.91297	1.94059
Si to Ca sum (Sum FM+Ca+Sr)	1.85273	1.70377	1.83251	1.59308	1.72085	1.70486	1.801	1.6885	1.71575	1.62323	1.67176	1.68267	1.70108	1.71783	1.7176	1.80429	1.7437	1.72775	1.6701	1.67917	1.68097	1.68272	1.71782	1.68774	1.68134	1.71955	1.66994	1.69004	1.66692	1.6861	1.69187	1.70143	1.71182	1.71888	1.69299	1.68095	1.6696	1.70499	1.71408	1.68028	1.68876	1.70326	1.71823	1.71777	1.67588	1.71723	1.68531	1.71869	1.69471
Si to Li sum (Sum FM)	1.84916	1.69485	1.82841	1.58595	1.69963	1.58521	1.64538	1.57491	1.60145	1.52194	1.56871	1.57585	1.56787	1.60299	1.60187	1.6279	1.58161	1.57975	1.56882	1.56219	1.57576	1.56637	1.60298	1.57754	1.56134	1.60578	1.56829	1.5604	1.56275	1.56128	1.5765	1.58053	1.58272	1.60475	1.57194	1.55934	1.56992	1.57143	1.58087	1.55796	1.56834	1.58931	1.60286	1.60276	1.55872	1.60328	1.57511	1.60278	1.56977
Part 3a. Џ13 normalized based on anions
Si	14.0407	13.4042	11.5991	13.8062	14.0718	16.0183	15.198	15.6916	15.4154	16.2122	15.712	15.6273	15.6958	15.3493	15.3519	15.0925	15.5076	15.5231	15.6257	15.6865	15.5459	15.6389	15.2792	15.5215	15.6812	15.2472	15.6089	15.6878	15.662	15.6762	15.5139	15.4743	15.4502	15.238	15.5512	15.6735	15.5651	15.5502	15.4573	15.6819	15.577	15.3616	15.2317	15.23	15.6575	15.2224	15.4919	15.2244	15.5414
Ti	0	0	0.035604	0	0	0.0123199	0.0493568	0.0454682	0.0142275	0.0342187	0.0330741	0.0289171	0.0394443	0.0101527	0.0101598	0.0675618	0.0144059	0.0370875	0.0518692	0.043755	0.0413124	0.0519296	0.00609165	0.0371187	0.0437789	0.0121621	0.0477356	0.0521488	0.0327212	0.0312718	0.0495517	0.010297	0.0205655	0.0101415	0.0471485	0.0480097	0.0414661	0.0372838	0.0411789	0.05432	0.0395985	0.0102401	0.0121842	0.012185	0.0647343	0.00812068	0.0351302	0.010154	0.0362449
Al	0.0827406	0.993014	3.11916	0.00964727	0.0765173	0.299205	0.44581	0.0850051	0.248402	0.0527782	0.0583492	0.0509727	0.182972	0.23146	0.224457	0.709692	0.278121	0.336559	0.0512013	0.122425	0.0898141	0.0682531	0.236233	0.103218	0.107793	0.235821	0.0536574	0.13237	0.0560996	0.105347	0.189249	0.27105	0.258591	0.238356	0.124123	0.125102	0.0560381	0.194729	0.16937	0.108027	0.111506	0.267145	0.274432	0.233879	0.0858881	0.250504	0.0558536	0.226717	0.138038
Cr	0	0	0	0	0	0.153775	0.124385	0.0130341	0.145807	0.0337194	0.063253	0.0407074	0.0474609	0.123256	0.107324	0.151224	0.0811186	0.0909599	0.0425256	0.042706	0.0700207	0.0194285	0.134462	0.0580517	0.0312253	0.126238	0.0441759	0.00328883	0.0387008	0.0147915	0.110679	0.118514	0.0859254	0.131116	0.0029219	0.00329108	0.0408612	0.0571509	0.0746638	0.024705	0.0266356	0.161451	0.153682	0.131279	0.0246929	0.150441	0.0390976	0.128075	0.0160681
Fe3+	0	0	0	0	0	0	0	0	0	0	0	0	0	0	0	0	0	0	0	0	0	0	0	0	0	0	0	0	0	0	0	0	0	0	0	0	0	0	0	0	0	0	0	0	0	0	0	0	0
Fe2+	0.0391402	2.1779	0.0544286	4.11866	0.481198	0.343573	0.285273	0.163143	0.316362	0.153366	0.232823	0.239977	0.236582	0.323959	0.318536	0.317967	0.23796	0.265729	0.288341	0.319679	0.259511	0.19066	0.326218	0.269588	0.216712	0.320015	0.279207	0.263225	0.236547	0.23874	0.255946	0.269032	0.243509	0.323603	0.327663	0.201905	0.288138	0.225684	0.22548	0.245056	0.32072	0.314223	0.31834	0.321748	0.231006	0.318257	0.236644	0.328517	0.286943
Mn	0.0594627	0.0324383	0	0.670204	1.79203	0.00924851	0.00513457	0	0.00915473	0.00120412	0.00244159	0.00348878	0.00233769	0.00914593	0.00915229	0.00514465	0.00579348	0.0058003	0.00350443	0.00586549	0.00348898	0.000900877	0.00914597	0.00561093	0.00234748	0.0102713	0.00233706	0.00352332	0.00133685	0.00352135	0.00348735	0.00463794	0.00231577	0.0102778	0.00402207	0.00117524	0.00350196	0.00349861	0.00463694	0.00352885	0.00421827	0.00576539	0.00914664	0.00800384	0.00235142	0.00914426	0.00349043	0.00800373	0.00311704
Mg	5.82589	3.42556	5.04879	1.30161	3.63987	4.32988	4.7058	4.90296	4.69685	4.66458	4.81112	4.86729	4.73982	4.75069	4.7701	4.52294	4.75577	4.66337	4.80688	4.69926	4.83686	4.90459	4.77486	4.83796	4.82578	4.79867	4.82494	4.77285	4.85153	4.82389	4.7589	4.72432	4.78911	4.79571	4.78445	4.85057	4.84048	4.80916	4.85796	4.79484	4.77466	4.70836	4.76515	4.80571	4.8318	4.79006	4.93307	4.80967	4.81836
Ni	0	0	0	0	0	0	0	0	0	0	0	0	0	0	0	0	0	0	0	0	0	0	0	0	0	0	0	0	0	0	0	0	0	0	0	0	0	0	0	0	0	0	0	0	0	0	0	0	0
Zn	0	0	0	0	0	0	0	0	0	0	0	0	0	0	0	0	0	0	0	0	0	0	0	0	0	0	0	0	0	0	0	0	0	0	0	0	0	0	0	0	0	0	0	0	0	0	0	0	0
Li	0	0	0	0	0	0	0	0	0	0	0	0	0	0	0	0	0	0	0	0	0	0	0	0	0	0	0	0	0	0	0	0	0	0	0	0	0	0	0	0	0	0	0	0	0	0	0	0	0
Ca	0.0250723	0.0683878	0.0291605	0.058467	0.162306	0.981242	1.22962	0.937611	0.927866	0.865146	0.853986	0.881152	1.10446	0.931313	0.939196	1.40857	1.33231	1.21795	0.839298	0.973442	0.867963	0.965651	0.931317	0.90813	0.999214	0.921032	0.842534	1.08003	0.866588	1.03934	0.951372	0.994413	1.06041	0.92451	1.00101	1.01387	0.825418	1.10491	1.09538	1.02072	0.998134	0.932034	0.935725	0.932893	0.977095	0.923914	0.909532	0.940112	1.03471
Na	0.0226864	0.012376	0.16749	0.00661288	0.0320871	0.686738	0.725086	0.805765	0.746573	0.802111	0.951356	0.831906	0.715735	0.753706	0.762087	0.597641	0.523852	0.638657	0.818256	0.782789	0.85192	0.810041	0.752402	0.938371	0.775157	0.758927	0.809167	0.658672	0.965547	0.734881	0.816929	0.79892	0.772636	0.762027	0.770619	0.684679	0.840393	0.708778	0.7271	0.69875	0.815293	0.822222	0.751148	0.765593	0.719938	0.766652	0.784358	0.760348	0.82484
K	0	0	0	0	0	0.0383069	0.0465772	0.238354	0.0293007	0.18136	0.168617	0.186541	0.150521	0.0275506	0.0284313	0.0381839	0.0750431	0.0567854	0.234002	0.19259	0.169911	0.25614	0.0284117	0.126572	0.22982	0.0275027	0.249041	0.249415	0.167644	0.230713	0.121683	0.0855724	0.0723745	0.0275203	0.238515	0.206218	0.232959	0.152815	0.100395	0.273725	0.218964	0.0468917	0.0301358	0.0292767	0.291298	0.0318495	0.214667	0.0275542	0.193251
Ba	0	0	0	0	0	0	0	0	0	0	0	0	0	0	0	0	0	0	0	0	0	0	0	0	0	0	0	0	0	0	0	0	0	0	0	0	0	0	0	0	0	0	0	0	0	0	0	0	0
Sr	0	0	0	0	0	0	0	0	0	0	0	0	0	0	0	0	0	0	0	0	0	0	0	0	0	0	0	0	0	0	0	0	0	0	0	0	0	0	0	0	0	0	0	0	0	0	0	0	0
Pb	0	0	0	0	0	0	0	0	0	0	0	0	0	0	0	0	0	0	0	0	0	0	0	0	0	0	0	0	0	0	0	0	0	0	0	0	0	0	0	0	0	0	0	0	0	0	0	0	0
F	0	0	0	0	0	0	0	0	0	0	0	0	0	0	0	0	0	0	0	0	0	0	0	0	0	0	0	0	0	0	0	0	0	0	0	0	0	0	0	0	0	0	0	0	0	0	0	0	0
Cl	0	0	0	0	0	0	0	0	0	0	0	0	0	0	0	0	0	0	0	0	0	0	0	0	0	0	0	0	0	0	0	0	0	0	0	0	0	0	0	0	0	0	0	0	0	0	0	0	0
Total exc. F,Cl	20.0957	20.1139	20.0537	19.9714	20.2558	22.8726	22.815	22.8829	22.55	23.0006	22.887	22.7583	22.9152	22.5105	22.5213	22.9114	22.8119	22.836	22.7616	22.869	22.7367	22.9065	22.4783	22.8062	22.913	22.4578	22.7617	22.9033	22.8788	22.8987	22.7717	22.7511	22.7556	22.4613	22.8517	22.8083	22.7344	22.8442	22.7535	22.9055	22.8867	22.6299	22.4817	22.4706	22.8863	22.4713	22.7037	22.4636	22.893
Part 3b. Џ15 normalized based on anions
Si	16.1696	15.3854	13.3536	15.8589	16.0364	17.1855	16.0208	16.8877	16.6021	17.5391	17.0117	16.8869	16.6924	16.5268	16.5202	15.712	16.23	16.3769	16.9362	16.8389	16.8149	16.7971	16.4513	16.7401	16.8022	16.4289	16.914	16.7128	16.9422	16.7489	16.6799	16.5862	16.4827	16.415	16.6608	16.7764	16.8875	16.537	16.4493	16.7772	16.6919	16.5391	16.395	16.3965	16.8034	16.3988	16.7064	16.382	16.6104
Ti	0	0	0.0409896	0	0	0.0132176	0.052029	0.048934	0.0153227	0.0370194	0.03581	0.0312478	0.0419487	0.0109315	0.0109329	0.070335	0.015077	0.0391274	0.0562195	0.0469694	0.0446848	0.0557756	0.00655895	0.0400327	0.0469086	0.0131047	0.0517271	0.0555562	0.0353957	0.0334116	0.0532762	0.0110369	0.0219397	0.0109248	0.0505126	0.051388	0.044989	0.0396498	0.0438218	0.0581139	0.0424326	0.011025	0.0131147	0.0131182	0.0694719	0.00874827	0.0378843	0.010926	0.0387378
Al	0.0952862	1.13979	3.59098	0.0110816	0.0872005	0.321007	0.469946	0.0914846	0.267523	0.0570981	0.0631759	0.0550812	0.194589	0.249215	0.241539	0.738822	0.291077	0.355071	0.0554955	0.131419	0.0971456	0.0733082	0.254355	0.111322	0.115499	0.254099	0.058144	0.141019	0.060685	0.112556	0.203474	0.290526	0.275872	0.256766	0.132979	0.133905	0.060799	0.207086	0.180239	0.115572	0.119487	0.287624	0.295391	0.251792	0.0921738	0.269863	0.0602324	0.243954	0.147532
Cr	0	0	0	0	0	0.16498	0.131119	0.0140277	0.157031	0.0364793	0.0684854	0.0439885	0.0504743	0.132712	0.115491	0.157431	0.0848976	0.095963	0.0460922	0.0458434	0.0757365	0.0208675	0.144777	0.0626091	0.0334575	0.136022	0.0478697	0.00350372	0.0418641	0.0158036	0.118998	0.12703	0.0916673	0.141243	0.00313038	0.00352266	0.0443327	0.0607776	0.0794556	0.0264305	0.0285419	0.173827	0.165419	0.141333	0.0265	0.162068	0.0421627	0.137813	0.0171733
Fe3+	0	0	0	0	0	0	0	0	0	0	0	0	0	0	0	0	0	0	0	0	0	0	0	0	0	0	0	0	0	0	0	0	0	0	0	0	0	0	0	0	0	0	0	0	0	0	0	0	0
Fe2+	0.0450749	2.49981	0.0626617	4.73103	0.548382	0.368607	0.300717	0.175579	0.340714	0.165919	0.252082	0.259319	0.251603	0.34881	0.342778	0.331019	0.249045	0.280345	0.312524	0.343164	0.280695	0.204781	0.351243	0.290752	0.232205	0.344819	0.302553	0.280424	0.255882	0.255076	0.275184	0.288363	0.259781	0.348597	0.351042	0.216112	0.312617	0.240005	0.239951	0.262172	0.343674	0.33831	0.342652	0.34639	0.247912	0.342853	0.255196	0.353494	0.306679
Mn	0.0684787	0.0372329	0	0.769849	2.04223	0.00992241	0.00541255	0	0.00985944	0.00130268	0.00264356	0.00376998	0.00248612	0.00984752	0.0098488	0.00535582	0.00606338	0.00611935	0.00379834	0.0062964	0.00377378	0.000967599	0.00984757	0.00605142	0.0025153	0.0110674	0.00253248	0.00375353	0.00144613	0.0037623	0.00374947	0.0049712	0.00247052	0.0110717	0.00430905	0.00125794	0.00379948	0.00372063	0.00493453	0.00377533	0.00452017	0.00620734	0.00984518	0.00861684	0.0025235	0.00985096	0.00376407	0.00861226	0.00333143
Mg	6.70924	3.93189	5.81249	1.49514	4.14807	4.64539	4.96056	5.27668	5.0584	5.04637	5.2091	5.2596	5.04077	5.11512	5.13312	4.70859	4.97732	4.91987	5.21003	5.04449	5.23169	5.26784	5.14114	5.21777	5.17077	5.1706	5.22838	5.0847	5.24808	5.15397	5.11659	5.06379	5.10915	5.16612	5.12583	5.19189	5.25171	5.11434	5.16973	5.12973	5.11639	5.06928	5.12906	5.17377	5.18541	5.16025	5.31981	5.17535	5.14976
Ni	0	0	0	0	0	0	0	0	0	0	0	0	0	0	0	0	0	0	0	0	0	0	0	0	0	0	0	0	0	0	0	0	0	0	0	0	0	0	0	0	0	0	0	0	0	0	0	0	0
Zn	0	0	0	0	0	0	0	0	0	0	0	0	0	0	0	0	0	0	0	0	0	0	0	0	0	0	0	0	0	0	0	0	0	0	0	0	0	0	0	0	0	0	0	0	0	0	0	0	0
Li	0	0	0	0	0	0	0	0	0	0	0	0	0	0	0	0	0	0	0	0	0	0	0	0	0	0	0	0	0	0	0	0	0	0	0	0	0	0	0	0	0	0	0	0	0	0	0	0	0
Ca	0.0288739	0.0784961	0.0335714	0.0671599	0.184967	1.05274	1.29619	1.00908	0.999291	0.935958	0.924629	0.952175	1.17458	1.00275	1.01067	1.46639	1.39438	1.28495	0.90969	1.04496	0.938814	1.03717	1.00276	0.979424	1.07065	0.992418	0.912984	1.1506	0.937421	1.11046	1.02288	1.06587	1.13128	0.995917	1.07243	1.08522	0.895544	1.17503	1.16568	1.09202	1.06957	1.00348	1.00719	1.00434	1.0486	0.995317	0.980836	1.01159	1.10587
Na	0.0261262	0.0142052	0.192825	0.00759608	0.036567	0.736778	0.764341	0.867184	0.804042	0.867763	1.03005	0.898959	0.76118	0.811524	0.820084	0.622172	0.548256	0.673786	0.886883	0.840297	0.921462	0.870036	0.810119	1.01204	0.830572	0.817749	0.876827	0.701708	1.04447	0.785167	0.878332	0.856328	0.824268	0.820884	0.825604	0.732858	0.911791	0.753757	0.773764	0.747554	0.873644	0.88525	0.808514	0.824229	0.772626	0.825901	0.84585	0.818158	0.881571
K	0	0	0	0	0	0.0410982	0.0490989	0.256523	0.0315561	0.196204	0.182565	0.201577	0.160078	0.029664	0.030595	0.0397513	0.0785391	0.0599089	0.253628	0.206739	0.183781	0.275111	0.0305911	0.136509	0.24625	0.0296343	0.269864	0.265712	0.181346	0.246499	0.13083	0.0917214	0.0772109	0.0296458	0.255533	0.220729	0.25275	0.162513	0.106838	0.292843	0.234635	0.0504862	0.0324373	0.031519	0.312617	0.034311	0.231497	0.0296491	0.206543
Ba	0	0	0	0	0	0	0	0	0	0	0	0	0	0	0	0	0	0	0	0	0	0	0	0	0	0	0	0	0	0	0	0	0	0	0	0	0	0	0	0	0	0	0	0	0	0	0	0	0
Sr	0	0	0	0	0	0	0	0	0	0	0	0	0	0	0	0	0	0	0	0	0	0	0	0	0	0	0	0	0	0	0	0	0	0	0	0	0	0	0	0	0	0	0	0	0	0	0	0	0
Pb	0	0	0	0	0	0	0	0	0	0	0	0	0	0	0	0	0	0	0	0	0	0	0	0	0	0	0	0	0	0	0	0	0	0	0	0	0	0	0	0	0	0	0	0	0	0	0	0	0
F	0	0	0	0	0	0	0	0	0	0	0	0	0	0	0	0	0	0	0	0	0	0	0	0	0	0	0	0	0	0	0	0	0	0	0	0	0	0	0	0	0	0	0	0	0	0	0	0	0
Cl	0	0	0	0	0	0	0	0	0	0	0	0	0	0	0	0	0	0	0	0	0	0	0	0	0	0	0	0	0	0	0	0	0	0	0	0	0	0	0	0	0	0	0	0	0	0	0	0	0
Total exc. F,Cl	23.1427	23.0868	23.0871	22.9407	23.0839	24.5392	24.0502	24.6272	24.2858	24.8832	24.7803	24.5926	24.3701	24.2373	24.2353	23.8518	23.8747	24.0921	24.6706	24.549	24.5926	24.603	24.2027	24.5966	24.551	24.1984	24.6649	24.3998	24.7488	24.4656	24.4833	24.3859	24.2763	24.1962	24.4822	24.4133	24.6658	24.2939	24.2137	24.5054	24.5248	24.3646	24.1986	24.1916	24.5612	24.208	24.4836	24.1715	24.4676
Part 4. Iron oxidation state calculations
Џ13 Fe3+	5.80863	5.77228	5.89257	6.05723	5.48844	0.254824	0.369976	0.234101	0.900063	-0.00127632	0.225921	0.483425	0.169677	0.978924	0.957339	0.177255	0.376128	0.328015	0.476819	0.262051	0.526691	0.187091	1.04331	0.387678	0.173973	1.08437	0.4767	0.193393	0.242478	0.202533	0.45665	0.497867	0.488709	1.07738	0.296678	0.383357	0.531292	0.311589	0.493092	0.188933	0.226512	0.740137	1.03666	1.05883	0.227375	1.05739	0.592588	1.07287	0.213978
Џ13 Fe3+ = 0 if Fe3+ < 0	5.80863	5.77228	5.89257	6.05723	5.48844	0.254824	0.369976	0.234101	0.900063	0	0.225921	0.483425	0.169677	0.978924	0.957339	0.177255	0.376128	0.328015	0.476819	0.262051	0.526691	0.187091	1.04331	0.387678	0.173973	1.08437	0.4767	0.193393	0.242478	0.202533	0.45665	0.497867	0.488709	1.07738	0.296678	0.383357	0.531292	0.311589	0.493092	0.188933	0.226512	0.740137	1.03666	1.05883	0.227375	1.05739	0.592588	1.07287	0.213978
Џ15 Fe3+	-0.28539	-0.173699	-0.174228	0.118537	-0.167707	-3.07845	-2.10041	-3.25439	-2.57162	-3.76645	-3.56055	-3.1853	-2.74025	-2.4747	-2.47051	-1.70364	-1.74932	-2.18413	-3.34121	-3.09809	-3.18528	-3.20599	-2.40535	-3.19316	-3.10207	-2.39688	-3.3298	-2.79954	-3.4976	-2.93121	-2.96653	-2.77175	-2.55258	-2.39231	-2.96431	-2.82659	-3.33165	-2.58777	-2.42748	-3.01073	-3.04956	-2.72928	-2.3972	-2.38317	-3.12247	-2.41593	-2.96723	-2.343	-2.93514
Џ15 Fe3+ = 0 if Fe3+ < 0	0	0	0	0.118537	0	0	0	0	0	0	0	0	0	0	0	0	0	0	0	0	0	0	0	0	0	0	0	0	0	0	0	0	0	0	0	0	0	0	0	0	0	0	0	0	0	0	0	0	0
Џ13 Fe3+ = total Fe2+ if Fe3+ > total Fe2+	0.0391402	2.1779	0.0544286	4.11866	0.481198	0.254824	0.285273	0.163143	0.316362	0	0.225921	0.239977	0.169677	0.323959	0.318536	0.177255	0.23796	0.265729	0.288341	0.262051	0.259511	0.187091	0.326218	0.269588	0.173973	0.320015	0.279207	0.193393	0.236547	0.202533	0.255946	0.269032	0.243509	0.323603	0.296678	0.201905	0.288138	0.225684	0.22548	0.188933	0.226512	0.314223	0.31834	0.321748	0.227375	0.318257	0.236644	0.328517	0.213978
Џ13 Fe2+ = total Fe2+ - Fe3+	0	0	0	0	0	0.0887488	0	0	0	0.153366	0.00690139	0	0.0669049	0	0	0.140712	0	0	0	0.0576278	0	0.00356976	0	0	0.0427392	0	0	0.0698315	0	0.036207	0	0	0	0	0.030985	0	0	0	0	0.0561225	0.0942082	0	0	0	0.00363115	0	0	0	0.0729658
Џ15 Fe3+ = total Fe2+ if Fe3+ > total Fe2+	0	0	0	0.118537	0	0	0	0	0	0	0	0	0	0	0	0	0	0	0	0	0	0	0	0	0	0	0	0	0	0	0	0	0	0	0	0	0	0	0	0	0	0	0	0	0	0	0	0	0
Џ15 Fe2+ = total Fe2+ - Fe3+	0.0450749	2.49981	0.0626617	4.61249	0.548382	0.368607	0.300717	0.175579	0.340714	0.165919	0.252082	0.259319	0.251603	0.34881	0.342778	0.331019	0.249045	0.280345	0.312524	0.343164	0.280695	0.204781	0.351243	0.290752	0.232205	0.344819	0.302553	0.280424	0.255882	0.255076	0.275184	0.288363	0.259781	0.348597	0.351042	0.216112	0.312617	0.240005	0.239951	0.262172	0.343674	0.33831	0.342652	0.34639	0.247912	0.342853	0.255196	0.353494	0.306679
Part 5a. Cations based on 23 O. Џ13 (Fe2+ - Fe3+)
Si	8.03496	7.66378	6.65161	7.94993	7.98909	8.05376	7.6606	7.88594	7.86154	8.10585	7.89478	7.89666	7.87697	7.84153	7.83909	7.57542	7.8177	7.81729	7.89469	7.88817	7.86296	7.85136	7.81689	7.82673	7.87036	7.80764	7.88615	7.87701	7.87252	7.87278	7.83472	7.82182	7.80805	7.80175	7.82607	7.90261	7.87349	7.82812	7.81239	7.87327	7.82705	7.8064	7.79145	7.79442	7.86764	7.79025	7.84702	7.79399	7.80704
Ti	0	0	0.0204174	0	0	0.00619426	0.0248785	0.0228504	0.0072557	0.0171089	0.0166187	0.0146121	0.0197952	0.00518673	0.00518785	0.0339116	0.00726235	0.0186769	0.0262062	0.0220028	0.0208955	0.0260708	0.00311651	0.0187171	0.0219725	0.00622784	0.0241177	0.0261845	0.0164473	0.0157051	0.0250243	0.00520481	0.0103931	0.00519238	0.0237273	0.0242066	0.0209753	0.018769	0.0208126	0.027272	0.0198972	0.00520376	0.00623255	0.00623604	0.032528	0.00415587	0.0177943	0.00519825	0.0182071
Al	0.0631324	0.757001	2.38495	0.00740684	0.0579225	0.200581	0.299616	0.0569599	0.168906	0.0351845	0.0390914	0.0343427	0.122433	0.157662	0.152819	0.474958	0.186942	0.225984	0.0344917	0.0820843	0.0605696	0.0456879	0.161144	0.0693972	0.0721348	0.16101	0.0361462	0.0886194	0.0375979	0.070542	0.127431	0.182677	0.174246	0.162715	0.0832858	0.084102	0.0377953	0.130704	0.114137	0.0723148	0.0747053	0.181009	0.187173	0.159593	0.0575432	0.170932	0.0377217	0.154754	0.0924551
Cr	0	0	0	0	0	0.103088	0.0835959	0.00873387	0.0991445	0.022479	0.0423768	0.0274265	0.0317577	0.0839576	0.0730698	0.101206	0.0545249	0.0610754	0.0286473	0.0286338	0.0472211	0.0130053	0.0917218	0.0390301	0.0208959	0.0861905	0.029759	0.00220181	0.0259373	0.00990459	0.0745256	0.0798737	0.0578987	0.0895068	0.00196058	0.00221249	0.0275591	0.0383604	0.0503152	0.0165379	0.0178449	0.109394	0.104817	0.0895813	0.0165437	0.102654	0.0264052	0.0874225	0.0107622
Fe3+	0.0447969	2.4904	0.0624253	4.74325	0.54639	0.256243	0.287586	0.163978	0.322675	0	0.227036	0.242525	0.170305	0.331003	0.325307	0.177941	0.239921	0.267637	0.291361	0.263552	0.262517	0.187855	0.333789	0.271879	0.174634	0.327741	0.282131	0.19421	0.237801	0.203429	0.258513	0.271975	0.246124	0.331364	0.298604	0.203602	0.291505	0.227223	0.227923	0.189713	0.227633	0.319362	0.32568	0.329328	0.228504	0.325745	0.239732	0.336362	0.214978
Fe2+	0	0	0	0	0	0.0892432	0	0	0	0.153362	0.00693545	0	0.0671526	0	0	0.141256	0	0	0	0.0579579	0	0.00358434	0	0	0.0429015	0	0	0.0701263	0	0.0363671	0	0	0	0	0.0311861	0	0	0	0	0.056354	0.0946744	0	0	0	0.00364919	0	0	0	0.0733068
Mn	0.0680565	0.0370929	0	0.771838	2.03481	0.00930003	0.0051762	0	0.00933743	0.00120409	0.00245364	0.00352583	0.00234634	0.00934479	0.00934681	0.00516455	0.00584124	0.00584196	0.00354113	0.0058991	0.00352939	0.000904556	0.00935823	0.00565862	0.00235639	0.0105193	0.00236154	0.0035382	0.00134394	0.00353692	0.00352231	0.00468869	0.00234063	0.0105243	0.00404818	0.00118512	0.00354288	0.00352247	0.00468718	0.00354341	0.00423914	0.00585968	0.00935753	0.00819241	0.0023631	0.00935941	0.00353598	0.00819486	0.00313161
Mg	6.66787	3.9171	5.79055	1.499	4.133	4.354	4.74395	4.92804	4.79059	4.66445	4.83487	4.91898	4.75737	4.85399	4.87149	4.54043	4.79498	4.69686	4.85723	4.72618	4.89288	4.92462	4.88567	4.87908	4.8441	4.91452	4.87546	4.793	4.87724	4.84523	4.80662	4.77601	4.84054	4.91073	4.81551	4.89133	4.89704	4.84195	4.9106	4.81461	4.79829	4.78536	4.87501	4.91893	4.8558	4.90276	4.99745	4.92452	4.84087
Ni	0	0	0	0	0	0	0	0	0	0	0	0	0	0	0	0	0	0	0	0	0	0	0	0	0	0	0	0	0	0	0	0	0	0	0	0	0	0	0	0	0	0	0	0	0	0	0	0	0
Zn	0	0	0	0	0	0	0	0	0	0	0	0	0	0	0	0	0	0	0	0	0	0	0	0	0	0	0	0	0	0	0	0	0	0	0	0	0	0	0	0	0	0	0	0	0	0	0	0	0
Li	0	0	0	0	0	0	0	0	0	0	0	0	0	0	0	0	0	0	0	0	0	0	0	0	0	0	0	0	0	0	0	0	0	0	0	0	0	0	0	0	0	0	0	0	0	0	0	0	0
Ca	0.0286959	0.0782008	0.0334447	0.0673334	0.184295	0.986708	1.23959	0.942407	0.946384	0.865122	0.858201	0.890511	1.10855	0.951563	0.959158	1.41402	1.34329	1.2267	0.848089	0.979019	0.878016	0.969595	0.952931	0.915849	1.00301	0.943268	0.851357	1.08459	0.871181	1.04394	0.960911	1.00529	1.0718	0.946683	1.00751	1.02239	0.835062	1.11245	1.10725	1.02493	1.00307	0.947276	0.957298	0.954872	0.981948	0.945651	0.921401	0.962562	1.03954
Na	0.0519302	0.0283036	0.384196	0.0152314	0.0728684	1.38113	1.46193	1.61977	1.52294	1.60418	1.9121	1.68148	1.43677	1.54019	1.55657	1.1999	1.05634	1.28649	1.65365	1.57455	1.72358	1.6267	1.53973	1.89269	1.5562	1.5545	1.63528	1.32291	1.94133	1.47626	1.65024	1.61532	1.56187	1.56061	1.55124	1.38087	1.70043	1.42722	1.46996	1.40326	1.63865	1.67134	1.53693	1.56726	1.44703	1.56938	1.58919	1.55701	1.65739
K	0	0	0	0	0	0.0770406	0.0939098	0.479147	0.0597708	0.36271	0.338898	0.377045	0.302156	0.0562992	0.0580711	0.0766633	0.151324	0.114387	0.472907	0.387387	0.343758	0.514372	0.058142	0.255296	0.461385	0.0563333	0.503297	0.500936	0.337064	0.463466	0.245807	0.173017	0.146303	0.0563606	0.480126	0.415901	0.471361	0.307714	0.202966	0.549707	0.440095	0.095317	0.0616612	0.0599329	0.585491	0.0651978	0.434938	0.0564243	0.388308
Ba	0	0	0	0	0	0	0	0	0	0	0	0	0	0	0	0	0	0	0	0	0	0	0	0	0	0	0	0	0	0	0	0	0	0	0	0	0	0	0	0	0	0	0	0	0	0	0	0	0
Sr	0	0	0	0	0	0	0	0	0	0	0	0	0	0	0	0	0	0	0	0	0	0	0	0	0	0	0	0	0	0	0	0	0	0	0	0	0	0	0	0	0	0	0	0	0	0	0	0	0
Pb	0	0	0	0	0	0	0	0	0	0	0	0	0	0	0	0	0	0	0	0	0	0	0	0	0	0	0	0	0	0	0	0	0	0	0	0	0	0	0	0	0	0	0	0	0	0	0	0	0
F	0	0	0	0	0	0	0	0	0	0	0	0	0	0	0	0	0	0	0	0	0	0	0	0	0	0	0	0	0	0	0	0	0	0	0	0	0	0	0	0	0	0	0	0	0	0	0	0	0
Cl	0	0	0	0	0	0	0	0	0	0	0	0	0	0	0	0	0	0	0	0	0	0	0	0	0	0	0	0	0	0	0	0	0	0	0	0	0	0	0	0	0	0	0	0	0	0	0	0	0
Total	14.9594	14.9719	15.3276	15.054	15.0184	15.5173	15.9008	16.1078	15.7885	15.8316	16.1734	16.0871	15.8956	15.8307	15.8501	15.7409	15.6581	15.7209	16.1108	16.0154	16.0959	16.1638	15.8525	16.1743	16.0699	15.868	16.1261	15.9633	16.2185	16.0412	15.9873	15.9359	15.9196	15.8754	16.1233	15.9284	16.1588	15.936	15.921	16.0315	16.1462	15.9265	15.8556	15.8884	16.079	15.8861	16.1152	15.8864	16.146
Part 5b. Cations based on 23 O. Џ15 (Fe2+ - Fe3+)
Si	8.03496	7.66378	6.65161	7.94993	7.98909	8.05376	7.6606	7.88594	7.86154	8.10585	7.89478	7.89666	7.87697	7.84153	7.83909	7.57542	7.8177	7.81729	7.89469	7.88817	7.86296	7.85136	7.81689	7.82673	7.87036	7.80764	7.88615	7.87701	7.87252	7.87278	7.83472	7.82182	7.80805	7.80175	7.82607	7.90261	7.87349	7.82812	7.81239	7.87327	7.82705	7.8064	7.79145	7.79442	7.86764	7.79025	7.84702	7.79399	7.80704
Ti	0	0	0.0204174	0	0	0.00619426	0.0248785	0.0228504	0.0072557	0.0171089	0.0166187	0.0146121	0.0197952	0.00518673	0.00518785	0.0339116	0.00726235	0.0186769	0.0262062	0.0220028	0.0208955	0.0260708	0.00311651	0.0187171	0.0219725	0.00622784	0.0241177	0.0261845	0.0164473	0.0157051	0.0250243	0.00520481	0.0103931	0.00519238	0.0237273	0.0242066	0.0209753	0.018769	0.0208126	0.027272	0.0198972	0.00520376	0.00623255	0.00623604	0.032528	0.00415587	0.0177943	0.00519825	0.0182071
Al	0.0631324	0.757001	2.38495	0.00740684	0.0579225	0.200581	0.299616	0.0569599	0.168906	0.0351845	0.0390914	0.0343427	0.122433	0.157662	0.152819	0.474958	0.186942	0.225984	0.0344917	0.0820843	0.0605696	0.0456879	0.161144	0.0693972	0.0721348	0.16101	0.0361462	0.0886194	0.0375979	0.070542	0.127431	0.182677	0.174246	0.162715	0.0832858	0.084102	0.0377953	0.130704	0.114137	0.0723148	0.0747053	0.181009	0.187173	0.159593	0.0575432	0.170932	0.0377217	0.154754	0.0924551
Cr	0	0	0	0	0	0.103088	0.0835959	0.00873387	0.0991445	0.022479	0.0423768	0.0274265	0.0317577	0.0839576	0.0730698	0.101206	0.0545249	0.0610754	0.0286473	0.0286338	0.0472211	0.0130053	0.0917218	0.0390301	0.0208959	0.0861905	0.029759	0.00220181	0.0259373	0.00990459	0.0745256	0.0798737	0.0578987	0.0895068	0.00196058	0.00221249	0.0275591	0.0383604	0.0503152	0.0165379	0.0178449	0.109394	0.104817	0.0895813	0.0165437	0.102654	0.0264052	0.0874225	0.0107622
Fe3+	0	0	0	0.118843	0	0	0	0	0	0	0	0	0	0	0	0	0	0	0	0	0	0	0	0	0	0	0	0	0	0	0	0	0	0	0	0	0	0	0	0	0	0	0	0	0	0	0	0	0
Fe2+	0.0447969	2.4904	0.0624253	4.62441	0.54639	0.345487	0.287586	0.163978	0.322675	0.153362	0.233972	0.242525	0.237457	0.331003	0.325307	0.319197	0.239921	0.267637	0.291361	0.32151	0.262517	0.191439	0.333789	0.271879	0.217535	0.327741	0.282131	0.264336	0.237801	0.239796	0.258513	0.271975	0.246124	0.331364	0.32979	0.203602	0.291505	0.227223	0.227923	0.246067	0.322307	0.319362	0.32568	0.329328	0.232153	0.325745	0.239732	0.336362	0.288284
Mn	0.0680565	0.0370929	0	0.771838	2.03481	0.00930003	0.0051762	0	0.00933743	0.00120409	0.00245364	0.00352583	0.00234634	0.00934479	0.00934681	0.00516455	0.00584124	0.00584196	0.00354113	0.0058991	0.00352939	0.000904556	0.00935823	0.00565862	0.00235639	0.0105193	0.00236154	0.0035382	0.00134394	0.00353692	0.00352231	0.00468869	0.00234063	0.0105243	0.00404818	0.00118512	0.00354288	0.00352247	0.00468718	0.00354341	0.00423914	0.00585968	0.00935753	0.00819241	0.0023631	0.00935941	0.00353598	0.00819486	0.00313161
Mg	6.66787	3.9171	5.79055	1.499	4.133	4.354	4.74395	4.92804	4.79059	4.66445	4.83487	4.91898	4.75737	4.85399	4.87149	4.54043	4.79498	4.69686	4.85723	4.72618	4.89288	4.92462	4.88567	4.87908	4.8441	4.91452	4.87546	4.793	4.87724	4.84523	4.80662	4.77601	4.84054	4.91073	4.81551	4.89133	4.89704	4.84195	4.9106	4.81461	4.79829	4.78536	4.87501	4.91893	4.8558	4.90276	4.99745	4.92452	4.84087
Ni	0	0	0	0	0	0	0	0	0	0	0	0	0	0	0	0	0	0	0	0	0	0	0	0	0	0	0	0	0	0	0	0	0	0	0	0	0	0	0	0	0	0	0	0	0	0	0	0	0
Zn	0	0	0	0	0	0	0	0	0	0	0	0	0	0	0	0	0	0	0	0	0	0	0	0	0	0	0	0	0	0	0	0	0	0	0	0	0	0	0	0	0	0	0	0	0	0	0	0	0
Li	0	0	0	0	0	0	0	0	0	0	0	0	0	0	0	0	0	0	0	0	0	0	0	0	0	0	0	0	0	0	0	0	0	0	0	0	0	0	0	0	0	0	0	0	0	0	0	0	0
Ca	0.0286959	0.0782008	0.0334447	0.0673334	0.184295	0.986708	1.23959	0.942407	0.946384	0.865122	0.858201	0.890511	1.10855	0.951563	0.959158	1.41402	1.34329	1.2267	0.848089	0.979019	0.878016	0.969595	0.952931	0.915849	1.00301	0.943268	0.851357	1.08459	0.871181	1.04394	0.960911	1.00529	1.0718	0.946683	1.00751	1.02239	0.835062	1.11245	1.10725	1.02493	1.00307	0.947276	0.957298	0.954872	0.981948	0.945651	0.921401	0.962562	1.03954
Na	0.0519302	0.0283036	0.384196	0.0152314	0.0728684	1.38113	1.46193	1.61977	1.52294	1.60418	1.9121	1.68148	1.43677	1.54019	1.55657	1.1999	1.05634	1.28649	1.65365	1.57455	1.72358	1.6267	1.53973	1.89269	1.5562	1.5545	1.63528	1.32291	1.94133	1.47626	1.65024	1.61532	1.56187	1.56061	1.55124	1.38087	1.70043	1.42722	1.46996	1.40326	1.63865	1.67134	1.53693	1.56726	1.44703	1.56938	1.58919	1.55701	1.65739
K	0	0	0	0	0	0.0770406	0.0939098	0.479147	0.0597708	0.36271	0.338898	0.377045	0.302156	0.0562992	0.0580711	0.0766633	0.151324	0.114387	0.472907	0.387387	0.343758	0.514372	0.058142	0.255296	0.461385	0.0563333	0.503297	0.500936	0.337064	0.463466	0.245807	0.173017	0.146303	0.0563606	0.480126	0.415901	0.471361	0.307714	0.202966	0.549707	0.440095	0.095317	0.0616612	0.0599329	0.585491	0.0651978	0.434938	0.0564243	0.388308
Ba	0	0	0	0	0	0	0	0	0	0	0	0	0	0	0	0	0	0	0	0	0	0	0	0	0	0	0	0	0	0	0	0	0	0	0	0	0	0	0	0	0	0	0	0	0	0	0	0	0
Sr	0	0	0	0	0	0	0	0	0	0	0	0	0	0	0	0	0	0	0	0	0	0	0	0	0	0	0	0	0	0	0	0	0	0	0	0	0	0	0	0	0	0	0	0	0	0	0	0	0
Pb	0	0	0	0	0	0	0	0	0	0	0	0	0	0	0	0	0	0	0	0	0	0	0	0	0	0	0	0	0	0	0	0	0	0	0	0	0	0	0	0	0	0	0	0	0	0	0	0	0
F	0	0	0	0	0	0	0	0	0	0	0	0	0	0	0	0	0	0	0	0	0	0	0	0	0	0	0	0	0	0	0	0	0	0	0	0	0	0	0	0	0	0	0	0	0	0	0	0	0
Cl	0	0	0	0	0	0	0	0	0	0	0	0	0	0	0	0	0	0	0	0	0	0	0	0	0	0	0	0	0	0	0	0	0	0	0	0	0	0	0	0	0	0	0	0	0	0	0	0	0
Total	14.9594	14.9719	15.3276	15.054	15.0184	15.5173	15.9008	16.1078	15.7885	15.8316	16.1734	16.0871	15.8956	15.8307	15.8501	15.7409	15.6581	15.7209	16.1108	16.0154	16.0959	16.1638	15.8525	16.1743	16.0699	15.868	16.1261	15.9633	16.2185	16.0412	15.9873	15.9359	15.9196	15.8754	16.1233	15.9284	16.1588	15.936	15.921	16.0315	16.1462	15.9265	15.8556	15.8884	16.079	15.8861	16.1152	15.8864	16.146
Part 6a. Intermediate 23 O - recheck sum anions Џ13
Si	16.0699	15.3276	13.3032	15.8999	15.9782	16.1075	15.3212	15.7719	15.7231	16.2117	15.7896	15.7933	15.7539	15.6831	15.6782	15.1508	15.6354	15.6346	15.7894	15.7763	15.7259	15.7027	15.6338	15.6535	15.7407	15.6153	15.7723	15.754	15.745	15.7456	15.6694	15.6436	15.6161	15.6035	15.6521	15.8052	15.747	15.6562	15.6248	15.7465	15.6541	15.6128	15.5829	15.5888	15.7353	15.5805	15.694	15.588	15.6141
Ti	0	0	0.0408349	0	0	0.0123885	0.049757	0.0457008	0.0145114	0.0342177	0.0332374	0.0292242	0.0395903	0.0103735	0.0103757	0.0678232	0.0145247	0.0373538	0.0524125	0.0440057	0.0417909	0.0521416	0.00623302	0.0374342	0.0439451	0.0124557	0.0482355	0.052369	0.0328946	0.0314101	0.0500486	0.0104096	0.0207863	0.0103848	0.0474545	0.0484131	0.0419507	0.0375381	0.0416251	0.054544	0.0397945	0.0104075	0.0124651	0.0124721	0.0650559	0.00831174	0.0355886	0.0103965	0.0364143
Al	0.0946987	1.1355	3.57743	0.0111103	0.0868837	0.300872	0.449425	0.0854399	0.253359	0.0527767	0.0586372	0.051514	0.183649	0.236492	0.229228	0.712437	0.280413	0.338976	0.0517376	0.123126	0.0908544	0.0685318	0.241716	0.104096	0.108202	0.241515	0.0542192	0.132929	0.0563969	0.105813	0.191147	0.274015	0.261368	0.244072	0.124929	0.126153	0.0566929	0.196057	0.171205	0.108472	0.112058	0.271514	0.28076	0.23939	0.0863148	0.256397	0.0565825	0.232131	0.138683
Cr	0	0	0	0	0	0.154632	0.125394	0.0131008	0.148717	0.0337185	0.0635652	0.0411397	0.0476366	0.125936	0.109605	0.151809	0.0817873	0.0916131	0.042971	0.0429506	0.0708317	0.0195079	0.137583	0.0585451	0.0313438	0.129286	0.0446385	0.00330272	0.0389059	0.0148569	0.111788	0.119811	0.086848	0.13426	0.00294086	0.00331873	0.0413386	0.0575406	0.0754728	0.0248069	0.0267674	0.164091	0.157226	0.134372	0.0248155	0.153981	0.0396078	0.131134	0.0161432
Fe3+	0.0671954	3.7356	0.0936379	7.11487	0.819584	0.384365	0.431378	0.245967	0.484013	0	0.340554	0.363788	0.255457	0.496504	0.48796	0.266911	0.359882	0.401456	0.437041	0.395328	0.393775	0.281782	0.500683	0.407818	0.26195	0.491612	0.423196	0.291315	0.356701	0.305143	0.387769	0.407963	0.369185	0.497045	0.447906	0.305402	0.437257	0.340834	0.341885	0.284569	0.341449	0.479043	0.488519	0.493992	0.342756	0.488617	0.359598	0.504543	0.322466
Fe2+	0	0	0	0	0	0.0892432	0	0	0	0.153362	0.00693545	0	0.0671526	0	0	0.141256	0	0	0	0.0579579	0	0.00358434	0	0	0.0429015	0	0	0.0701263	0	0.0363671	0	0	0	0	0.0311861	0	0	0	0	0.056354	0.0946744	0	0	0	0.00364919	0	0	0	0.0733068
Mn	0.0680565	0.0370929	0	0.771838	2.03481	0.00930003	0.0051762	0	0.00933743	0.00120409	0.00245364	0.00352583	0.00234634	0.00934479	0.00934681	0.00516455	0.00584124	0.00584196	0.00354113	0.0058991	0.00352939	0.000904556	0.00935823	0.00565862	0.00235639	0.0105193	0.00236154	0.0035382	0.00134394	0.00353692	0.00352231	0.00468869	0.00234063	0.0105243	0.00404818	0.00118512	0.00354288	0.00352247	0.00468718	0.00354341	0.00423914	0.00585968	0.00935753	0.00819241	0.0023631	0.00935941	0.00353598	0.00819486	0.00313161
Mg	6.66787	3.9171	5.79055	1.499	4.133	4.354	4.74395	4.92804	4.79059	4.66445	4.83487	4.91898	4.75737	4.85399	4.87149	4.54043	4.79498	4.69686	4.85723	4.72618	4.89288	4.92462	4.88567	4.87908	4.8441	4.91452	4.87546	4.793	4.87724	4.84523	4.80662	4.77601	4.84054	4.91073	4.81551	4.89133	4.89704	4.84195	4.9106	4.81461	4.79829	4.78536	4.87501	4.91893	4.8558	4.90276	4.99745	4.92452	4.84087
Ni	0	0	0	0	0	0	0	0	0	0	0	0	0	0	0	0	0	0	0	0	0	0	0	0	0	0	0	0	0	0	0	0	0	0	0	0	0	0	0	0	0	0	0	0	0	0	0	0	0
Zn	0	0	0	0	0	0	0	0	0	0	0	0	0	0	0	0	0	0	0	0	0	0	0	0	0	0	0	0	0	0	0	0	0	0	0	0	0	0	0	0	0	0	0	0	0	0	0	0	0
Li	0	0	0	0	0	0	0	0	0	0	0	0	0	0	0	0	0	0	0	0	0	0	0	0	0	0	0	0	0	0	0	0	0	0	0	0	0	0	0	0	0	0	0	0	0	0	0	0	0
Ca	0.0286959	0.0782008	0.0334447	0.0673334	0.184295	0.986708	1.23959	0.942407	0.946384	0.865122	0.858201	0.890511	1.10855	0.951563	0.959158	1.41402	1.34329	1.2267	0.848089	0.979019	0.878016	0.969595	0.952931	0.915849	1.00301	0.943268	0.851357	1.08459	0.871181	1.04394	0.960911	1.00529	1.0718	0.946683	1.00751	1.02239	0.835062	1.11245	1.10725	1.02493	1.00307	0.947276	0.957298	0.954872	0.981948	0.945651	0.921401	0.962562	1.03954
Na	0.0259651	0.0141518	0.192098	0.00761571	0.0364342	0.690564	0.730965	0.809887	0.761472	0.802088	0.956051	0.840741	0.718385	0.770095	0.778285	0.599952	0.528171	0.643244	0.826826	0.787274	0.861788	0.81335	0.769863	0.946346	0.778099	0.77725	0.81764	0.661453	0.970664	0.738131	0.82512	0.807662	0.780933	0.780303	0.775622	0.690433	0.850213	0.713612	0.734978	0.701632	0.819327	0.835668	0.768466	0.783631	0.723514	0.784689	0.794595	0.778505	0.828695
K	0	0	0	0	0	0.0385203	0.0469549	0.239573	0.0298854	0.181355	0.169449	0.188522	0.151078	0.0281496	0.0290356	0.0383316	0.0756618	0.0571933	0.236453	0.193693	0.171879	0.257186	0.029071	0.127648	0.230693	0.0281667	0.251648	0.250468	0.168532	0.231733	0.122904	0.0865087	0.0731517	0.0281803	0.240063	0.207951	0.235681	0.153857	0.101483	0.274853	0.220047	0.0476585	0.0308306	0.0299665	0.292745	0.0325989	0.217469	0.0282122	0.194154
Ba	0	0	0	0	0	0	0	0	0	0	0	0	0	0	0	0	0	0	0	0	0	0	0	0	0	0	0	0	0	0	0	0	0	0	0	0	0	0	0	0	0	0	0	0	0	0	0	0	0
Sr	0	0	0	0	0	0	0	0	0	0	0	0	0	0	0	0	0	0	0	0	0	0	0	0	0	0	0	0	0	0	0	0	0	0	0	0	0	0	0	0	0	0	0	0	0	0	0	0	0
Pb	0	0	0	0	0	0	0	0	0	0	0	0	0	0	0	0	0	0	0	0	0	0	0	0	0	0	0	0	0	0	0	0	0	0	0	0	0	0	0	0	0	0	0	0	0	0	0	0	0
F	0	0	0	0	0	0	0	0	0	0	0	0	0	0	0	0	0	0	0	0	0	0	0	0	0	0	0	0	0	0	0	0	0	0	0	0	0	0	0	0	0	0	0	0	0	0	0	0	0
Cl	0	0	0	0	0	0	0	0	0	0	0	0	0	0	0	0	0	0	0	0	0	0	0	0	0	0	0	0	0	0	0	0	0	0	0	0	0	0	0	0	0	0	0	0	0	0	0	0	0
Total exc. F, Cl	23.0224	24.2452	23.0312	25.3716	23.2732	23.1281	23.1438	23.082	23.1613	23	23.1135	23.1213	23.0852	23.1655	23.1627	23.089	23.12	23.1338	23.1457	23.1318	23.1313	23.0939	23.1669	23.1359	23.0873	23.1639	23.1411	23.0971	23.1189	23.1017	23.1293	23.136	23.1231	23.1657	23.1493	23.1018	23.1458	23.1136	23.114	23.0949	23.1138	23.1597	23.1628	23.1647	23.1143	23.1629	23.1199	23.1682	23.1075
adjustment factor	0.999027	0.948641	0.998645	0.906525	0.988261	0.99446	0.993787	0.996448	0.993034	1	0.995089	0.994755	0.996311	0.992856	0.992978	0.996147	0.994811	0.994215	0.993706	0.994303	0.994325	0.995933	0.992796	0.994124	0.996218	0.992926	0.993904	0.995796	0.994857	0.995597	0.994412	0.994122	0.994678	0.992848	0.99355	0.995593	0.993703	0.995085	0.99507	0.995893	0.995076	0.993105	0.99297	0.992892	0.995057	0.992968	0.994815	0.992741	0.995348
Part 6b. Intermediate 23 O - recheck sum anions Џ15
Si	16.0699	15.3276	13.3032	15.8999	15.9782	16.1075	15.3212	15.7719	15.7231	16.2117	15.7896	15.7933	15.7539	15.6831	15.6782	15.1508	15.6354	15.6346	15.7894	15.7763	15.7259	15.7027	15.6338	15.6535	15.7407	15.6153	15.7723	15.754	15.745	15.7456	15.6694	15.6436	15.6161	15.6035	15.6521	15.8052	15.747	15.6562	15.6248	15.7465	15.6541	15.6128	15.5829	15.5888	15.7353	15.5805	15.694	15.588	15.6141
Ti	0	0	0.0408349	0	0	0.0123885	0.049757	0.0457008	0.0145114	0.0342177	0.0332374	0.0292242	0.0395903	0.0103735	0.0103757	0.0678232	0.0145247	0.0373538	0.0524125	0.0440057	0.0417909	0.0521416	0.00623302	0.0374342	0.0439451	0.0124557	0.0482355	0.052369	0.0328946	0.0314101	0.0500486	0.0104096	0.0207863	0.0103848	0.0474545	0.0484131	0.0419507	0.0375381	0.0416251	0.054544	0.0397945	0.0104075	0.0124651	0.0124721	0.0650559	0.00831174	0.0355886	0.0103965	0.0364143
Al	0.0946987	1.1355	3.57743	0.0111103	0.0868837	0.300872	0.449425	0.0854399	0.253359	0.0527767	0.0586372	0.051514	0.183649	0.236492	0.229228	0.712437	0.280413	0.338976	0.0517376	0.123126	0.0908544	0.0685318	0.241716	0.104096	0.108202	0.241515	0.0542192	0.132929	0.0563969	0.105813	0.191147	0.274015	0.261368	0.244072	0.124929	0.126153	0.0566929	0.196057	0.171205	0.108472	0.112058	0.271514	0.28076	0.23939	0.0863148	0.256397	0.0565825	0.232131	0.138683
Cr	0	0	0	0	0	0.154632	0.125394	0.0131008	0.148717	0.0337185	0.0635652	0.0411397	0.0476366	0.125936	0.109605	0.151809	0.0817873	0.0916131	0.042971	0.0429506	0.0708317	0.0195079	0.137583	0.0585451	0.0313438	0.129286	0.0446385	0.00330272	0.0389059	0.0148569	0.111788	0.119811	0.086848	0.13426	0.00294086	0.00331873	0.0413386	0.0575406	0.0754728	0.0248069	0.0267674	0.164091	0.157226	0.134372	0.0248155	0.153981	0.0396078	0.131134	0.0161432
Fe3+	0	0	0	0.178264	0	0	0	0	0	0	0	0	0	0	0	0	0	0	0	0	0	0	0	0	0	0	0	0	0	0	0	0	0	0	0	0	0	0	0	0	0	0	0	0	0	0	0	0	0
Fe2+	0.0447969	2.4904	0.0624253	4.62441	0.54639	0.345487	0.287586	0.163978	0.322675	0.153362	0.233972	0.242525	0.237457	0.331003	0.325307	0.319197	0.239921	0.267637	0.291361	0.32151	0.262517	0.191439	0.333789	0.271879	0.217535	0.327741	0.282131	0.264336	0.237801	0.239796	0.258513	0.271975	0.246124	0.331364	0.32979	0.203602	0.291505	0.227223	0.227923	0.246067	0.322307	0.319362	0.32568	0.329328	0.232153	0.325745	0.239732	0.336362	0.288284
Mn	0.0680565	0.0370929	0	0.771838	2.03481	0.00930003	0.0051762	0	0.00933743	0.00120409	0.00245364	0.00352583	0.00234634	0.00934479	0.00934681	0.00516455	0.00584124	0.00584196	0.00354113	0.0058991	0.00352939	0.000904556	0.00935823	0.00565862	0.00235639	0.0105193	0.00236154	0.0035382	0.00134394	0.00353692	0.00352231	0.00468869	0.00234063	0.0105243	0.00404818	0.00118512	0.00354288	0.00352247	0.00468718	0.00354341	0.00423914	0.00585968	0.00935753	0.00819241	0.0023631	0.00935941	0.00353598	0.00819486	0.00313161
Mg	6.66787	3.9171	5.79055	1.499	4.133	4.354	4.74395	4.92804	4.79059	4.66445	4.83487	4.91898	4.75737	4.85399	4.87149	4.54043	4.79498	4.69686	4.85723	4.72618	4.89288	4.92462	4.88567	4.87908	4.8441	4.91452	4.87546	4.793	4.87724	4.84523	4.80662	4.77601	4.84054	4.91073	4.81551	4.89133	4.89704	4.84195	4.9106	4.81461	4.79829	4.78536	4.87501	4.91893	4.8558	4.90276	4.99745	4.92452	4.84087
Ni	0	0	0	0	0	0	0	0	0	0	0	0	0	0	0	0	0	0	0	0	0	0	0	0	0	0	0	0	0	0	0	0	0	0	0	0	0	0	0	0	0	0	0	0	0	0	0	0	0
Zn	0	0	0	0	0	0	0	0	0	0	0	0	0	0	0	0	0	0	0	0	0	0	0	0	0	0	0	0	0	0	0	0	0	0	0	0	0	0	0	0	0	0	0	0	0	0	0	0	0
Li	0	0	0	0	0	0	0	0	0	0	0	0	0	0	0	0	0	0	0	0	0	0	0	0	0	0	0	0	0	0	0	0	0	0	0	0	0	0	0	0	0	0	0	0	0	0	0	0	0
Ca	0.0286959	0.0782008	0.0334447	0.0673334	0.184295	0.986708	1.23959	0.942407	0.946384	0.865122	0.858201	0.890511	1.10855	0.951563	0.959158	1.41402	1.34329	1.2267	0.848089	0.979019	0.878016	0.969595	0.952931	0.915849	1.00301	0.943268	0.851357	1.08459	0.871181	1.04394	0.960911	1.00529	1.0718	0.946683	1.00751	1.02239	0.835062	1.11245	1.10725	1.02493	1.00307	0.947276	0.957298	0.954872	0.981948	0.945651	0.921401	0.962562	1.03954
Na	0.0259651	0.0141518	0.192098	0.00761571	0.0364342	0.690564	0.730965	0.809887	0.761472	0.802088	0.956051	0.840741	0.718385	0.770095	0.778285	0.599952	0.528171	0.643244	0.826826	0.787274	0.861788	0.81335	0.769863	0.946346	0.778099	0.77725	0.81764	0.661453	0.970664	0.738131	0.82512	0.807662	0.780933	0.780303	0.775622	0.690433	0.850213	0.713612	0.734978	0.701632	0.819327	0.835668	0.768466	0.783631	0.723514	0.784689	0.794595	0.778505	0.828695
K	0	0	0	0	0	0.0385203	0.0469549	0.239573	0.0298854	0.181355	0.169449	0.188522	0.151078	0.0281496	0.0290356	0.0383316	0.0756618	0.0571933	0.236453	0.193693	0.171879	0.257186	0.029071	0.127648	0.230693	0.0281667	0.251648	0.250468	0.168532	0.231733	0.122904	0.0865087	0.0731517	0.0281803	0.240063	0.207951	0.235681	0.153857	0.101483	0.274853	0.220047	0.0476585	0.0308306	0.0299665	0.292745	0.0325989	0.217469	0.0282122	0.194154
Ba	0	0	0	0	0	0	0	0	0	0	0	0	0	0	0	0	0	0	0	0	0	0	0	0	0	0	0	0	0	0	0	0	0	0	0	0	0	0	0	0	0	0	0	0	0	0	0	0	0
Sr	0	0	0	0	0	0	0	0	0	0	0	0	0	0	0	0	0	0	0	0	0	0	0	0	0	0	0	0	0	0	0	0	0	0	0	0	0	0	0	0	0	0	0	0	0	0	0	0	0
Pb	0	0	0	0	0	0	0	0	0	0	0	0	0	0	0	0	0	0	0	0	0	0	0	0	0	0	0	0	0	0	0	0	0	0	0	0	0	0	0	0	0	0	0	0	0	0	0	0	0
F	0	0	0	0	0	0	0	0	0	0	0	0	0	0	0	0	0	0	0	0	0	0	0	0	0	0	0	0	0	0	0	0	0	0	0	0	0	0	0	0	0	0	0	0	0	0	0	0	0
Cl	0	0	0	0	0	0	0	0	0	0	0	0	0	0	0	0	0	0	0	0	0	0	0	0	0	0	0	0	0	0	0	0	0	0	0	0	0	0	0	0	0	0	0	0	0	0	0	0	0
Total exc. F, Cl	23	23	23	23.0594	23	23	23	23	23	23	23	23	23	23	23	23	23	23	23	23	23	23	23	23	23	23	23	23	23	23	23	23	23	23	23	23	23	23	23	23	23	23	23	23	23	23	23	23	23
adjustment factor	1	1	1	0.997423	1	1	1	1	1	1	1	1	1	1	1	1	1	1	1	1	1	1	1	1	1	1	1	1	1	1	1	1	1	1	1	1	1	1	1	1	1	1	1	1	1	1	1	1	1
Part 7a. Formula based on 23 (O) inc. Fe2/Fe3 (Џ13)
Si	8.02714	7.27017	6.64259	7.2068	7.89531	8.00915	7.61301	7.85793	7.80677	8.10585	7.85601	7.85524	7.84791	7.78551	7.78404	7.54623	7.77714	7.77207	7.845	7.84323	7.81834	7.81943	7.76058	7.78075	7.84059	7.7524	7.83808	7.84389	7.83203	7.83812	7.79093	7.77584	7.7665	7.74595	7.77559	7.86779	7.82391	7.78965	7.77387	7.84093	7.78851	7.75258	7.73668	7.73902	7.82875	7.73548	7.80634	7.73741	7.77072
Ti	0	0	0.0203898	0	0	0.00615995	0.0247239	0.0227692	0.00720516	0.0171089	0.0165371	0.0145355	0.0197221	0.00514967	0.00515142	0.0337809	0.00722466	0.0185689	0.0260413	0.0218775	0.0207769	0.0259648	0.00309406	0.0186071	0.0218894	0.00618378	0.0239707	0.0260744	0.0163627	0.0156359	0.0248844	0.00517422	0.0103378	0.00515524	0.0235742	0.0240999	0.0208433	0.0186768	0.02071	0.02716	0.0197993	0.00516788	0.00618874	0.00619171	0.0323672	0.00412665	0.0177021	0.00516052	0.0181224
Al	0.063071	0.718122	2.38172	0.00671448	0.0572426	0.19947	0.297755	0.0567576	0.16773	0.0351845	0.0388994	0.0341626	0.121981	0.156535	0.151745	0.473128	0.185972	0.224677	0.0342746	0.0816167	0.0602259	0.0455021	0.159983	0.0689894	0.0718619	0.159871	0.0359258	0.0882469	0.0374046	0.0702314	0.126719	0.181603	0.173318	0.161551	0.0827486	0.0837314	0.0375573	0.130062	0.113574	0.0720178	0.0743374	0.179761	0.185857	0.158459	0.0572588	0.16973	0.0375261	0.153631	0.092025
Cr	0	0	0	0	0	0.102517	0.0830765	0.00870284	0.0984539	0.022479	0.0421687	0.0272826	0.0316406	0.0833578	0.0725567	0.100816	0.054242	0.0607221	0.028467	0.0284706	0.0469532	0.0129524	0.091061	0.0388008	0.0208168	0.0855807	0.0295776	0.00219256	0.0258039	0.00986098	0.0741091	0.0794042	0.0575906	0.0888667	0.00194793	0.00220274	0.0273855	0.0381719	0.0500672	0.01647	0.0177571	0.10864	0.10408	0.0889445	0.0164619	0.101932	0.0262683	0.0867879	0.0107121
Fe3+	0.0447534	2.3625	0.0623407	4.29987	0.539976	0.254824	0.285799	0.163396	0.320428	0	0.225921	0.241253	0.169677	0.328638	0.323022	0.177255	0.238676	0.266089	0.289527	0.262051	0.261027	0.187091	0.331384	0.270281	0.173973	0.325423	0.280411	0.193393	0.236578	0.202533	0.257068	0.270377	0.244814	0.328994	0.296678	0.202704	0.289669	0.226106	0.226799	0.188933	0.226512	0.31716	0.32339	0.326987	0.227375	0.323454	0.238489	0.33392	0.213978
Fe2+	0	0	0	0	0	0.0887488	0	0	0	0.153362	0.00690139	0	0.0669049	0	0	0.140712	0	0	0	0.0576278	0	0.00356976	0	0	0.0427392	0	0	0.0698315	0	0.036207	0	0	0	0	0.030985	0	0	0	0	0.0561225	0.0942082	0	0	0	0.00363115	0	0	0	0.0729658
Mn	0.0679902	0.0351878	0	0.69969	2.01093	0.00924851	0.00514404	0	0.00927239	0.00120409	0.00244159	0.00350734	0.00233769	0.00927803	0.00928118	0.00514465	0.00581093	0.00580817	0.00351884	0.00586549	0.00350936	0.000900877	0.00929081	0.00562537	0.00234748	0.0104448	0.00234714	0.00352332	0.00133703	0.00352135	0.00350263	0.00466113	0.00232818	0.0104491	0.00402207	0.0011799	0.00352057	0.00350515	0.00466407	0.00352885	0.00421827	0.00581928	0.00929174	0.00813417	0.00235142	0.00929359	0.00351765	0.00813537	0.00311704
Mg	6.66139	3.71592	5.78271	1.35888	4.08448	4.32988	4.71448	4.91053	4.75722	4.66445	4.81112	4.89318	4.73982	4.81931	4.83728	4.52294	4.7701	4.66969	4.82665	4.69926	4.86512	4.90459	4.85047	4.85041	4.82578	4.87976	4.84574	4.77285	4.85216	4.82389	4.77975	4.74793	4.81478	4.87561	4.78445	4.86978	4.8662	4.81816	4.88638	4.79484	4.77466	4.75236	4.84074	4.88397	4.8318	4.86828	4.97154	4.88878	4.81836
Ni	0	0	0	0	0	0	0	0	0	0	0	0	0	0	0	0	0	0	0	0	0	0	0	0	0	0	0	0	0	0	0	0	0	0	0	0	0	0	0	0	0	0	0	0	0	0	0	0	0
Zn	0	0	0	0	0	0	0	0	0	0	0	0	0	0	0	0	0	0	0	0	0	0	0	0	0	0	0	0	0	0	0	0	0	0	0	0	0	0	0	0	0	0	0	0	0	0	0	0	0
Li	0	0	0	0	0	0	0	0	0	0	0	0	0	0	0	0	0	0	0	0	0	0	0	0	0	0	0	0	0	0	0	0	0	0	0	0	0	0	0	0	0	0	0	0	0	0	0	0	0
Ca	0.028668	0.0741845	0.0333994	0.0610393	0.182131	0.981242	1.23189	0.939059	0.939792	0.865122	0.853986	0.88584	1.10446	0.944764	0.952423	1.40857	1.33632	1.21961	0.842751	0.973442	0.873033	0.965651	0.946066	0.910468	0.999214	0.936595	0.846167	1.08003	0.8667	1.03934	0.955541	0.999384	1.0661	0.939912	1.00101	1.01789	0.829804	1.10698	1.10179	1.02072	0.998134	0.940744	0.950568	0.948085	0.977095	0.939002	0.916624	0.955575	1.03471
Na	0.0518797	0.0268499	0.383675	0.0138077	0.072013	1.37348	1.45285	1.61402	1.51234	1.60418	1.90271	1.67266	1.43147	1.52919	1.54564	1.19528	1.05086	1.27905	1.64324	1.56558	1.71379	1.62008	1.52863	1.88157	1.55031	1.5435	1.62531	1.31734	1.93134	1.46976	1.64102	1.60583	1.55355	1.54944	1.54124	1.37478	1.68972	1.42021	1.46271	1.3975	1.63059	1.65981	1.52613	1.55612	1.43988	1.55834	1.58095	1.54571	1.64968
K	0	0	0	0	0	0.0766139	0.0933263	0.477445	0.0593545	0.36271	0.337233	0.375067	0.301041	0.055897	0.0576633	0.0763678	0.150538	0.113725	0.46993	0.38518	0.341807	0.51228	0.0577232	0.253796	0.45964	0.0559348	0.500229	0.49883	0.33533	0.461425	0.244433	0.172001	0.145525	0.0559575	0.47703	0.414069	0.468393	0.306202	0.201965	0.547449	0.437928	0.0946598	0.0612277	0.0595069	0.582597	0.0647393	0.432683	0.0560147	0.386502
Ba	0	0	0	0	0	0	0	0	0	0	0	0	0	0	0	0	0	0	0	0	0	0	0	0	0	0	0	0	0	0	0	0	0	0	0	0	0	0	0	0	0	0	0	0	0	0	0	0	0
Sr	0	0	0	0	0	0	0	0	0	0	0	0	0	0	0	0	0	0	0	0	0	0	0	0	0	0	0	0	0	0	0	0	0	0	0	0	0	0	0	0	0	0	0	0	0	0	0	0	0
Pb	0	0	0	0	0	0	0	0	0	0	0	0	0	0	0	0	0	0	0	0	0	0	0	0	0	0	0	0	0	0	0	0	0	0	0	0	0	0	0	0	0	0	0	0	0	0	0	0	0
F	0	0	0	0	0	0	0	0	0	0	0	0	0	0	0	0	0	0	0	0	0	0	0	0	0	0	0	0	0	0	0	0	0	0	0	0	0	0	0	0	0	0	0	0	0	0	0	0	0
Cl	0	0	0	0	0	0	0	0	0	0	0	0	0	0	0	0	0	0	0	0	0	0	0	0	0	0	0	0	0	0	0	0	0	0	0	0	0	0	0	0	0	0	0	0	0	0	0	0	0
OE FM	23	23	23	23	23	23	23	23	23	23	23	23	23	23	23	23	23	23	23	23	23	23	23	23	23	23	23	23	23	23	23	23	23	23	23	23	23	23	23	23	23	23	23	23	23	23	23	23	23
Part 7b. Formula based on 23 (O) inc. Fe2/Fe3 (Џ15)
Si	8.03496	7.66378	6.65161	7.92944	7.98909	8.05376	7.6606	7.88594	7.86154	8.10585	7.89478	7.89666	7.87697	7.84153	7.83909	7.57542	7.8177	7.81729	7.89469	7.88817	7.86296	7.85136	7.81689	7.82673	7.87036	7.80764	7.88615	7.87701	7.87252	7.87278	7.83472	7.82182	7.80805	7.80175	7.82607	7.90261	7.87349	7.82812	7.81239	7.87327	7.82705	7.8064	7.79145	7.79442	7.86764	7.79025	7.84702	7.79399	7.80704
Ti	0	0	0.0204174	0	0	0.00619426	0.0248785	0.0228504	0.0072557	0.0171089	0.0166187	0.0146121	0.0197952	0.00518673	0.00518785	0.0339116	0.00726235	0.0186769	0.0262062	0.0220028	0.0208955	0.0260708	0.00311651	0.0187171	0.0219725	0.00622784	0.0241177	0.0261845	0.0164473	0.0157051	0.0250243	0.00520481	0.0103931	0.00519238	0.0237273	0.0242066	0.0209753	0.018769	0.0208126	0.027272	0.0198972	0.00520376	0.00623255	0.00623604	0.032528	0.00415587	0.0177943	0.00519825	0.0182071
Al	0.0631324	0.757001	2.38495	0.00738775	0.0579225	0.200581	0.299616	0.0569599	0.168906	0.0351845	0.0390914	0.0343427	0.122433	0.157662	0.152819	0.474958	0.186942	0.225984	0.0344917	0.0820843	0.0605696	0.0456879	0.161144	0.0693972	0.0721348	0.16101	0.0361462	0.0886194	0.0375979	0.070542	0.127431	0.182677	0.174246	0.162715	0.0832858	0.084102	0.0377953	0.130704	0.114137	0.0723148	0.0747053	0.181009	0.187173	0.159593	0.0575432	0.170932	0.0377217	0.154754	0.0924551
Cr	0	0	0	0	0	0.103088	0.0835959	0.00873387	0.0991445	0.022479	0.0423768	0.0274265	0.0317577	0.0839576	0.0730698	0.101206	0.0545249	0.0610754	0.0286473	0.0286338	0.0472211	0.0130053	0.0917218	0.0390301	0.0208959	0.0861905	0.029759	0.00220181	0.0259373	0.00990459	0.0745256	0.0798737	0.0578987	0.0895068	0.00196058	0.00221249	0.0275591	0.0383604	0.0503152	0.0165379	0.0178449	0.109394	0.104817	0.0895813	0.0165437	0.102654	0.0264052	0.0874225	0.0107622
Fe3+	0	0	0	0.118537	0	0	0	0	0	0	0	0	0	0	0	0	0	0	0	0	0	0	0	0	0	0	0	0	0	0	0	0	0	0	0	0	0	0	0	0	0	0	0	0	0	0	0	0	0
Fe2+	0.0447969	2.4904	0.0624253	4.61249	0.54639	0.345487	0.287586	0.163978	0.322675	0.153362	0.233972	0.242525	0.237457	0.331003	0.325307	0.319197	0.239921	0.267637	0.291361	0.32151	0.262517	0.191439	0.333789	0.271879	0.217535	0.327741	0.282131	0.264336	0.237801	0.239796	0.258513	0.271975	0.246124	0.331364	0.32979	0.203602	0.291505	0.227223	0.227923	0.246067	0.322307	0.319362	0.32568	0.329328	0.232153	0.325745	0.239732	0.336362	0.288284
Mn	0.0680565	0.0370929	0	0.769849	2.03481	0.00930003	0.0051762	0	0.00933743	0.00120409	0.00245364	0.00352583	0.00234634	0.00934479	0.00934681	0.00516455	0.00584124	0.00584196	0.00354113	0.0058991	0.00352939	0.000904556	0.00935823	0.00565862	0.00235639	0.0105193	0.00236154	0.0035382	0.00134394	0.00353692	0.00352231	0.00468869	0.00234063	0.0105243	0.00404818	0.00118512	0.00354288	0.00352247	0.00468718	0.00354341	0.00423914	0.00585968	0.00935753	0.00819241	0.0023631	0.00935941	0.00353598	0.00819486	0.00313161
Mg	6.66787	3.9171	5.79055	1.49514	4.133	4.354	4.74395	4.92804	4.79059	4.66445	4.83487	4.91898	4.75737	4.85399	4.87149	4.54043	4.79498	4.69686	4.85723	4.72618	4.89288	4.92462	4.88567	4.87908	4.8441	4.91452	4.87546	4.793	4.87724	4.84523	4.80662	4.77601	4.84054	4.91073	4.81551	4.89133	4.89704	4.84195	4.9106	4.81461	4.79829	4.78536	4.87501	4.91893	4.8558	4.90276	4.99745	4.92452	4.84087
Ni	0	0	0	0	0	0	0	0	0	0	0	0	0	0	0	0	0	0	0	0	0	0	0	0	0	0	0	0	0	0	0	0	0	0	0	0	0	0	0	0	0	0	0	0	0	0	0	0	0
Zn	0	0	0	0	0	0	0	0	0	0	0	0	0	0	0	0	0	0	0	0	0	0	0	0	0	0	0	0	0	0	0	0	0	0	0	0	0	0	0	0	0	0	0	0	0	0	0	0	0
Li	0	0	0	0	0	0	0	0	0	0	0	0	0	0	0	0	0	0	0	0	0	0	0	0	0	0	0	0	0	0	0	0	0	0	0	0	0	0	0	0	0	0	0	0	0	0	0	0	0
Ca	0.0286959	0.0782008	0.0334447	0.0671599	0.184295	0.986708	1.23959	0.942407	0.946384	0.865122	0.858201	0.890511	1.10855	0.951563	0.959158	1.41402	1.34329	1.2267	0.848089	0.979019	0.878016	0.969595	0.952931	0.915849	1.00301	0.943268	0.851357	1.08459	0.871181	1.04394	0.960911	1.00529	1.0718	0.946683	1.00751	1.02239	0.835062	1.11245	1.10725	1.02493	1.00307	0.947276	0.957298	0.954872	0.981948	0.945651	0.921401	0.962562	1.03954
Na	0.0519302	0.0283036	0.384196	0.0151922	0.0728684	1.38113	1.46193	1.61977	1.52294	1.60418	1.9121	1.68148	1.43677	1.54019	1.55657	1.1999	1.05634	1.28649	1.65365	1.57455	1.72358	1.6267	1.53973	1.89269	1.5562	1.5545	1.63528	1.32291	1.94133	1.47626	1.65024	1.61532	1.56187	1.56061	1.55124	1.38087	1.70043	1.42722	1.46996	1.40326	1.63865	1.67134	1.53693	1.56726	1.44703	1.56938	1.58919	1.55701	1.65739
K	0	0	0	0	0	0.0770406	0.0939098	0.479147	0.0597708	0.36271	0.338898	0.377045	0.302156	0.0562992	0.0580711	0.0766633	0.151324	0.114387	0.472907	0.387387	0.343758	0.514372	0.058142	0.255296	0.461385	0.0563333	0.503297	0.500936	0.337064	0.463466	0.245807	0.173017	0.146303	0.0563606	0.480126	0.415901	0.471361	0.307714	0.202966	0.549707	0.440095	0.095317	0.0616612	0.0599329	0.585491	0.0651978	0.434938	0.0564243	0.388308
Ba	0	0	0	0	0	0	0	0	0	0	0	0	0	0	0	0	0	0	0	0	0	0	0	0	0	0	0	0	0	0	0	0	0	0	0	0	0	0	0	0	0	0	0	0	0	0	0	0	0
Sr	0	0	0	0	0	0	0	0	0	0	0	0	0	0	0	0	0	0	0	0	0	0	0	0	0	0	0	0	0	0	0	0	0	0	0	0	0	0	0	0	0	0	0	0	0	0	0	0	0
Pb	0	0	0	0	0	0	0	0	0	0	0	0	0	0	0	0	0	0	0	0	0	0	0	0	0	0	0	0	0	0	0	0	0	0	0	0	0	0	0	0	0	0	0	0	0	0	0	0	0
F	0	0	0	0	0	0	0	0	0	0	0	0	0	0	0	0	0	0	0	0	0	0	0	0	0	0	0	0	0	0	0	0	0	0	0	0	0	0	0	0	0	0	0	0	0	0	0	0	0
Cl	0	0	0	0	0	0	0	0	0	0	0	0	0	0	0	0	0	0	0	0	0	0	0	0	0	0	0	0	0	0	0	0	0	0	0	0	0	0	0	0	0	0	0	0	0	0	0	0	0
OE FM	23	23	23	23	23	23	23	23	23	23	23	23	23	23	23	23	23	23	23	23	23	23	23	23	23	23	23	23	23	23	23	23	23	23	23	23	23	23	23	23	23	23	23	23	23	23	23	23	23
Part 8. Select either Џ13 or Џ15
Si	8.03496	7.66378	6.65161	7.92944	7.98909	8.00915	7.61301	7.85793	7.80677	8.10585	7.85601	7.85524	7.84791	7.78551	7.78404	7.54623	7.77714	7.77207	7.845	7.84323	7.81834	7.81943	7.76058	7.78075	7.84059	7.7524	7.83808	7.84389	7.83203	7.83812	7.79093	7.77584	7.7665	7.74595	7.77559	7.86779	7.82391	7.78965	7.77387	7.84093	7.78851	7.75258	7.73668	7.73902	7.82875	7.73548	7.80634	7.73741	7.77072
Ti	0	0	0.0204174	0	0	0.00615995	0.0247239	0.0227692	0.00720516	0.0171089	0.0165371	0.0145355	0.0197221	0.00514967	0.00515142	0.0337809	0.00722466	0.0185689	0.0260413	0.0218775	0.0207769	0.0259648	0.00309406	0.0186071	0.0218894	0.00618378	0.0239707	0.0260744	0.0163627	0.0156359	0.0248844	0.00517422	0.0103378	0.00515524	0.0235742	0.0240999	0.0208433	0.0186768	0.02071	0.02716	0.0197993	0.00516788	0.00618874	0.00619171	0.0323672	0.00412665	0.0177021	0.00516052	0.0181224
Al	0.0631324	0.757001	2.38495	0.00738775	0.0579225	0.19947	0.297755	0.0567576	0.16773	0.0351845	0.0388994	0.0341626	0.121981	0.156535	0.151745	0.473128	0.185972	0.224677	0.0342746	0.0816167	0.0602259	0.0455021	0.159983	0.0689894	0.0718619	0.159871	0.0359258	0.0882469	0.0374046	0.0702314	0.126719	0.181603	0.173318	0.161551	0.0827486	0.0837314	0.0375573	0.130062	0.113574	0.0720178	0.0743374	0.179761	0.185857	0.158459	0.0572588	0.16973	0.0375261	0.153631	0.092025
Cr	0	0	0	0	0	0.102517	0.0830765	0.00870284	0.0984539	0.022479	0.0421687	0.0272826	0.0316406	0.0833578	0.0725567	0.100816	0.054242	0.0607221	0.028467	0.0284706	0.0469532	0.0129524	0.091061	0.0388008	0.0208168	0.0855807	0.0295776	0.00219256	0.0258039	0.00986098	0.0741091	0.0794042	0.0575906	0.0888667	0.00194793	0.00220274	0.0273855	0.0381719	0.0500672	0.01647	0.0177571	0.10864	0.10408	0.0889445	0.0164619	0.101932	0.0262683	0.0867879	0.0107121
Fe3+	0	0	0	0.118537	0	0.254824	0.285799	0.163396	0.320428	0	0.225921	0.241253	0.169677	0.328638	0.323022	0.177255	0.238676	0.266089	0.289527	0.262051	0.261027	0.187091	0.331384	0.270281	0.173973	0.325423	0.280411	0.193393	0.236578	0.202533	0.257068	0.270377	0.244814	0.328994	0.296678	0.202704	0.289669	0.226106	0.226799	0.188933	0.226512	0.31716	0.32339	0.326987	0.227375	0.323454	0.238489	0.33392	0.213978
Fe2+	0.0447969	2.4904	0.0624253	4.61249	0.54639	0.0887488	0	0	0	0.153362	0.00690139	0	0.0669049	0	0	0.140712	0	0	0	0.0576278	0	0.00356976	0	0	0.0427392	0	0	0.0698315	0	0.036207	0	0	0	0	0.030985	0	0	0	0	0.0561225	0.0942082	0	0	0	0.00363115	0	0	0	0.0729658
Mn	0.0680565	0.0370929	0	0.769849	2.03481	0.00924851	0.00514404	0	0.00927239	0.00120409	0.00244159	0.00350734	0.00233769	0.00927803	0.00928118	0.00514465	0.00581093	0.00580817	0.00351884	0.00586549	0.00350936	0.000900877	0.00929081	0.00562537	0.00234748	0.0104448	0.00234714	0.00352332	0.00133703	0.00352135	0.00350263	0.00466113	0.00232818	0.0104491	0.00402207	0.0011799	0.00352057	0.00350515	0.00466407	0.00352885	0.00421827	0.00581928	0.00929174	0.00813417	0.00235142	0.00929359	0.00351765	0.00813537	0.00311704
Mg	6.66787	3.9171	5.79055	1.49514	4.133	4.32988	4.71448	4.91053	4.75722	4.66445	4.81112	4.89318	4.73982	4.81931	4.83728	4.52294	4.7701	4.66969	4.82665	4.69926	4.86512	4.90459	4.85047	4.85041	4.82578	4.87976	4.84574	4.77285	4.85216	4.82389	4.77975	4.74793	4.81478	4.87561	4.78445	4.86978	4.8662	4.81816	4.88638	4.79484	4.77466	4.75236	4.84074	4.88397	4.8318	4.86828	4.97154	4.88878	4.81836
Ni	0	0	0	0	0	0	0	0	0	0	0	0	0	0	0	0	0	0	0	0	0	0	0	0	0	0	0	0	0	0	0	0	0	0	0	0	0	0	0	0	0	0	0	0	0	0	0	0	0
Zn	0	0	0	0	0	0	0	0	0	0	0	0	0	0	0	0	0	0	0	0	0	0	0	0	0	0	0	0	0	0	0	0	0	0	0	0	0	0	0	0	0	0	0	0	0	0	0	0	0
Li	0	0	0	0	0	0	0	0	0	0	0	0	0	0	0	0	0	0	0	0	0	0	0	0	0	0	0	0	0	0	0	0	0	0	0	0	0	0	0	0	0	0	0	0	0	0	0	0	0
Ca	0.0286959	0.0782008	0.0334447	0.0671599	0.184295	0.981242	1.23189	0.939059	0.939792	0.865122	0.853986	0.88584	1.10446	0.944764	0.952423	1.40857	1.33632	1.21961	0.842751	0.973442	0.873033	0.965651	0.946066	0.910468	0.999214	0.936595	0.846167	1.08003	0.8667	1.03934	0.955541	0.999384	1.0661	0.939912	1.00101	1.01789	0.829804	1.10698	1.10179	1.02072	0.998134	0.940744	0.950568	0.948085	0.977095	0.939002	0.916624	0.955575	1.03471
Na	0.0519302	0.0283036	0.384196	0.0151922	0.0728684	1.37348	1.45285	1.61402	1.51234	1.60418	1.90271	1.67266	1.43147	1.52919	1.54564	1.19528	1.05086	1.27905	1.64324	1.56558	1.71379	1.62008	1.52863	1.88157	1.55031	1.5435	1.62531	1.31734	1.93134	1.46976	1.64102	1.60583	1.55355	1.54944	1.54124	1.37478	1.68972	1.42021	1.46271	1.3975	1.63059	1.65981	1.52613	1.55612	1.43988	1.55834	1.58095	1.54571	1.64968
K	0	0	0	0	0	0.0766139	0.0933263	0.477445	0.0593545	0.36271	0.337233	0.375067	0.301041	0.055897	0.0576633	0.0763678	0.150538	0.113725	0.46993	0.38518	0.341807	0.51228	0.0577232	0.253796	0.45964	0.0559348	0.500229	0.49883	0.33533	0.461425	0.244433	0.172001	0.145525	0.0559575	0.47703	0.414069	0.468393	0.306202	0.201965	0.547449	0.437928	0.0946598	0.0612277	0.0595069	0.582597	0.0647393	0.432683	0.0560147	0.386502
Ba	0	0	0	0	0	0	0	0	0	0	0	0	0	0	0	0	0	0	0	0	0	0	0	0	0	0	0	0	0	0	0	0	0	0	0	0	0	0	0	0	0	0	0	0	0	0	0	0	0
Sr	0	0	0	0	0	0	0	0	0	0	0	0	0	0	0	0	0	0	0	0	0	0	0	0	0	0	0	0	0	0	0	0	0	0	0	0	0	0	0	0	0	0	0	0	0	0	0	0	0
Pb	0	0	0	0	0	0	0	0	0	0	0	0	0	0	0	0	0	0	0	0	0	0	0	0	0	0	0	0	0	0	0	0	0	0	0	0	0	0	0	0	0	0	0	0	0	0	0	0	0
F	0	0	0	0	0	0	0	0	0	0	0	0	0	0	0	0	0	0	0	0	0	0	0	0	0	0	0	0	0	0	0	0	0	0	0	0	0	0	0	0	0	0	0	0	0	0	0	0	0
Cl	0	0	0	0	0	0	0	0	0	0	0	0	0	0	0	0	0	0	0	0	0	0	0	0	0	0	0	0	0	0	0	0	0	0	0	0	0	0	0	0	0	0	0	0	0	0	0	0	0
OE FM	23	23	23	23	23	23	23	23	23	23	23	23	23	23	23	23	23	23	23	23	23	23	23	23	23	23	23	23	23	23	23	23	23	23	23	23	23	23	23	23	23	23	23	23	23	23	23	23	23
Part 9. Iron oxide, water and site allocation calcs.
FeO calc	0.4	20.4	0.55	35.1955	4.52	0.777518	0	0	0	1.29	0.0598329	0	0.579737	0	0	1.26596	0	0	0	0.497539	0	0.0309025	0	0	0.368795	0	0	0.602213	0	0.312417	0	0	0	0	0.269185	0	0	0	0	0.483231	0.816567	0	0	0	0.0312806	0	0	0	0.633021
Fe2O3 calc	0	0	0	1.00516	0	2.48096	2.88282	1.57805	3.11164	0	2.17667	2.32262	1.6339	3.18943	3.13387	1.77223	2.3115	2.57822	2.77825	2.51427	2.51154	1.79986	3.21166	2.612	1.66829	3.15609	2.68935	1.85341	2.27039	1.94209	2.4782	2.61156	2.36707	3.18943	2.86428	1.93366	2.77825	2.17815	2.18926	1.80783	2.18185	3.06719	3.13387	3.16721	2.17672	3.13387	2.28928	3.23388	2.06299
H2O - Џ13	2.24124	2.16527	2.2123	2.10526	2.09902	2.19685	2.27604	2.17922	2.1912	2.10924	2.17399	2.17233	2.17283	2.18986	2.18912	2.25602	2.18528	2.18632	2.16523	2.16495	2.17108	2.17074	2.18685	2.18061	2.16377	2.18839	2.16408	2.16248	2.16545	2.16369	2.17525	2.17948	2.18171	2.1875	2.17847	2.15248	2.16417	2.17369	2.1781	2.15909	2.17348	2.18215	2.18663	2.18558	2.16015	2.1862	2.16597	2.18526	2.17546
H2O - Џ15	2.23906	2.05406	2.2093	1.9134	2.07438	2.18468	2.2619	2.17148	2.17593	2.10924	2.16331	2.16094	2.16482	2.17422	2.17375	2.24733	2.17394	2.17367	2.1516	2.15262	2.15876	2.16191	2.1711	2.1678	2.15559	2.1729	2.15089	2.15339	2.15431	2.15416	2.1631	2.16667	2.1701	2.17185	2.16442	2.143	2.15054	2.163	2.16736	2.15022	2.16278	2.1671	2.17126	2.17005	2.14947	2.17083	2.15474	2.1694	2.16534
Site Allocation
Mg+Ni+Li	6.66787	3.9171	5.79055	1.49514	4.133	4.32988	4.71448	4.91053	4.75722	4.66445	4.81112	4.89318	4.73982	4.81931	4.83728	4.52294	4.7701	4.66969	4.82665	4.69926	4.86512	4.90459	4.85047	4.85041	4.82578	4.87976	4.84574	4.77285	4.85216	4.82389	4.77975	4.74793	4.81478	4.87561	4.78445	4.86978	4.8662	4.81816	4.88638	4.79484	4.77466	4.75236	4.84074	4.88397	4.8318	4.86828	4.97154	4.88878	4.81836
Mn+Zn	0.0680565	0.0370929	0	0.769849	2.03481	0.00924851	0.00514404	0	0.00927239	0.00120409	0.00244159	0.00350734	0.00233769	0.00927803	0.00928118	0.00514465	0.00581093	0.00580817	0.00351884	0.00586549	0.00350936	0.000900877	0.00929081	0.00562537	0.00234748	0.0104448	0.00234714	0.00352332	0.00133703	0.00352135	0.00350263	0.00466113	0.00232818	0.0104491	0.00402207	0.0011799	0.00352057	0.00350515	0.00466407	0.00352885	0.00421827	0.00581928	0.00929174	0.00813417	0.00235142	0.00929359	0.00351765	0.00813537	0.00311704
Ca+Sr	0.0286959	0.0782008	0.0334447	0.0671599	0.184295	0.981242	1.23189	0.939059	0.939792	0.865122	0.853986	0.88584	1.10446	0.944764	0.952423	1.40857	1.33632	1.21961	0.842751	0.973442	0.873033	0.965651	0.946066	0.910468	0.999214	0.936595	0.846167	1.08003	0.8667	1.03934	0.955541	0.999384	1.0661	0.939912	1.00101	1.01789	0.829804	1.10698	1.10179	1.02072	0.998134	0.940744	0.950568	0.948085	0.977095	0.939002	0.916624	0.955575	1.03471
K+Ba	0	0	0	0	0	0.0766139	0.0933263	0.477445	0.0593545	0.36271	0.337233	0.375067	0.301041	0.055897	0.0576633	0.0763678	0.150538	0.113725	0.46993	0.38518	0.341807	0.51228	0.0577232	0.253796	0.45964	0.0559348	0.500229	0.49883	0.33533	0.461425	0.244433	0.172001	0.145525	0.0559575	0.47703	0.414069	0.468393	0.306202	0.201965	0.547449	0.437928	0.0946598	0.0612277	0.0595069	0.582597	0.0647393	0.432683	0.0560147	0.386502
Al iv (1)	-0.034957	0.336224	1.34839	0.00738775	0.010907	-0.00914704	0.297755	0.0567576	0.16773	-0.105854	0.0388994	0.0341626	0.121981	0.156535	0.151745	0.453773	0.185972	0.224677	0.0342746	0.0816167	0.0602259	0.0455021	0.159983	0.0689894	0.0718619	0.159871	0.0359258	0.0882469	0.0374046	0.0702314	0.126719	0.181603	0.173318	0.161551	0.0827486	0.0837314	0.0375573	0.130062	0.113574	0.0720178	0.0743374	0.179761	0.185857	0.158459	0.0572588	0.16973	0.0375261	0.153631	0.092025
Al iv (2)	0	0.336224	1.34839	0.00738775	0.010907	0	0.297755	0.0567576	0.16773	0	0.0388994	0.0341626	0.121981	0.156535	0.151745	0.453773	0.185972	0.224677	0.0342746	0.0816167	0.0602259	0.0455021	0.159983	0.0689894	0.0718619	0.159871	0.0359258	0.0882469	0.0374046	0.0702314	0.126719	0.181603	0.173318	0.161551	0.0827486	0.0837314	0.0375573	0.130062	0.113574	0.0720178	0.0743374	0.179761	0.185857	0.158459	0.0572588	0.16973	0.0375261	0.153631	0.092025
Al vi	0.0631324	0.420777	1.03656	0	0.0470155	0.19947	0	0	0	0.0351845	0	0	0	0	0	0.019355	0	0	0	0	0	0	0	0	0	0	0	0	0	0	0	0	0	0	0	0	0	0	0	0	0	0	0	0	0	0	0	0	0
Limit Si max =8	8	7.66378	6.65161	7.92944	7.98909	8	7.61301	7.85793	7.80677	8	7.85601	7.85524	7.84791	7.78551	7.78404	7.54623	7.77714	7.77207	7.845	7.84323	7.81834	7.81943	7.76058	7.78075	7.84059	7.7524	7.83808	7.84389	7.83203	7.83812	7.79093	7.77584	7.7665	7.74595	7.77559	7.86779	7.82391	7.78965	7.77387	7.84093	7.78851	7.75258	7.73668	7.73902	7.82875	7.73548	7.80634	7.73741	7.77072
Total T site (Si max)	8.06313	8.42078	9.05698	8.05537	8.04702	8.56297	8.30436	8.10955	8.40059	8.07477	8.17954	8.17248	8.19094	8.35919	8.33652	8.33121	8.26326	8.34213	8.22331	8.23725	8.20732	8.09094	8.3461	8.17742	8.12913	8.32946	8.20797	8.1538	8.14818	8.13638	8.27371	8.3124	8.25256	8.33052	8.18054	8.18052	8.19936	8.20266	8.18502	8.14551	8.12691	8.36331	8.35619	8.3196	8.16222	8.33472	8.12632	8.31691	8.10556
Excess T if T>8	0.0631324	0.420777	1.05698	0.0553661	0.0470155	0.562971	0.304361	0.109552	0.400589	0.0747723	0.179536	0.172477	0.190935	0.359188	0.336515	0.331207	0.263257	0.342127	0.223312	0.237248	0.20732	0.0909397	0.346103	0.177425	0.129135	0.329461	0.207966	0.153796	0.14818	0.136378	0.273713	0.312399	0.252559	0.330519	0.180544	0.180524	0.199364	0.202663	0.185024	0.145512	0.126912	0.363309	0.356194	0.319599	0.162217	0.334719	0.126323	0.316911	0.105561
Limit XsT max =5	0.0631324	0.420777	1.05698	0.0553661	0.0470155	0.562971	0.304361	0.109552	0.400589	0.0747723	0.179536	0.172477	0.190935	0.359188	0.336515	0.331207	0.263257	0.342127	0.223312	0.237248	0.20732	0.0909397	0.346103	0.177425	0.129135	0.329461	0.207966	0.153796	0.14818	0.136378	0.273713	0.312399	0.252559	0.330519	0.180544	0.180524	0.199364	0.202663	0.185024	0.145512	0.126912	0.363309	0.356194	0.319599	0.162217	0.334719	0.126323	0.316911	0.105561
Total C site (T max)	6.84386	6.86537	6.90996	6.93284	6.76122	4.99085	5.02398	5.02008	5.16708	4.89379	5	5.06917	5	5.18777	5.18307	5	5.03917	5.01763	5.05348	5	5.07595	5	5.20587	5.03346	5	5.21966	5.05605	5	5.00168	5	5.05697	5.06499	5.06967	5.21657	5	5.05148	5.06908	5.02432	5.07607	5	5	5.12149	5.20622	5.2117	5	5.2123	5.10138	5.21382	5
Excess C if C>5	1.84386	1.86537	1.90996	1.93284	1.76122	0	0.023982	0.0200842	0.167079	0	0	0.0691666	0	0.187772	0.183073	0	0.0391654	0.0176263	0.0534847	0	0.0759486	0	0.205867	0.0334594	0	0.219662	0.0560538	0	0.00167615	0	0.0569691	0.0649943	0.069667	0.216574	0	0.0514829	0.0690827	0.024323	0.0760719	0	0	0.121492	0.206224	0.211698	0	0.212296	0.101377	0.213822	0
Limit XsC max =2	1.84386	1.86537	1.90996	1.93284	1.76122	0	0.023982	0.0200842	0.167079	0	0	0.0691666	0	0.187772	0.183073	0	0.0391654	0.0176263	0.0534847	0	0.0759486	0	0.205867	0.0334594	0	0.219662	0.0560538	0	0.00167615	0	0.0569691	0.0649943	0.069667	0.216574	0	0.0514829	0.0690827	0.024323	0.0760719	0	0	0.121492	0.206224	0.211698	0	0.212296	0.101377	0.213822	0
Total B site (C max)	1.92443	1.97188	2.32708	2.01381	2.01752	2.35472	2.70871	2.57316	2.61921	2.4693	2.7567	2.62767	2.53593	2.66172	2.68113	2.60385	2.42635	2.51628	2.53948	2.53902	2.66278	2.58573	2.68057	2.8255	2.54953	2.69976	2.52753	2.39738	2.79972	2.5091	2.65353	2.67021	2.68932	2.70593	2.54225	2.44415	2.5886	2.55151	2.64057	2.41822	2.62872	2.72205	2.68292	2.7159	2.41697	2.70964	2.59895	2.7151	2.68439
Excess B if B>2	0	0	0.327076	0.0138077	0.0175246	0.354719	0.708714	0.573163	0.619207	0.469299	0.756698	0.627671	0.535929	0.661722	0.681135	0.603849	0.426349	0.516278	0.53948	0.53902	0.662777	0.585734	0.680566	0.825499	0.549528	0.699759	0.527532	0.397377	0.79972	0.509104	0.653528	0.670208	0.689316	0.705929	0.542248	0.444151	0.588605	0.551511	0.640568	0.418224	0.62872	0.722048	0.68292	0.715903	0.41697	0.709641	0.598952	0.715105	0.684385
Excess B restricted to Na	0	0	0.327076	0.0138077	0.0175246	0.354719	0.708714	0.573163	0.619207	0.469299	0.756698	0.627671	0.535929	0.661722	0.681135	0.603849	0.426349	0.516278	0.53948	0.53902	0.662777	0.585734	0.680566	0.825499	0.549528	0.699759	0.527532	0.397377	0.79972	0.509104	0.653528	0.670208	0.689316	0.705929	0.542248	0.444151	0.588605	0.551511	0.640568	0.418224	0.62872	0.722048	0.68292	0.715903	0.41697	0.709641	0.598952	0.715105	0.684385
Total A site (No Ca)	0	0	0.327076	0.0138077	0.0175246	0.431333	0.80204	1.05061	0.678562	0.83201	1.09393	1.00274	0.83697	0.717619	0.738798	0.680217	0.576888	0.630002	1.00941	0.9242	1.00458	1.09801	0.738289	1.0793	1.00917	0.755694	1.02776	0.896207	1.13505	0.970529	0.897961	0.842208	0.834841	0.761887	1.01928	0.858219	1.057	0.857712	0.842533	0.965673	1.06665	0.816708	0.744148	0.77541	0.999567	0.774381	1.03163	0.771119	1.07089
Excess Na in A	0	0	0	0	0	0	0	0.050608	0	0	0.093931	0.00273817	0	0	0	0	0	0	0.00941001	0	0.00458432	0.0980142	0	0.0792951	0.00916777	0	0.0277609	0	0.135051	0	0	0	0	0	0.0192776	0	0.0569978	0	0	0	0.0666475	0	0	0	0	0	0.0316349	0	0.070887
Excess Na if K>1	0	0	0	0	0	0	0	0.050608	0	0	0.093931	0.00273817	0	0	0	0	0	0	0.00941001	0	0.00458432	0.0980142	0	0.0792951	0.00916777	0	0.0277609	0	0.135051	0	0	0	0	0	0.0192776	0	0.0569978	0	0	0	0.0666475	0	0	0	0	0	0.0316349	0	0.070887
Set (Na+K)A to max 1	0	0	0.327076	0.0138077	0.0175246	0.431333	0.80204	1	0.678562	0.83201	1	1	0.83697	0.717619	0.738798	0.680217	0.576888	0.630002	1	0.9242	1	1	0.738289	1	1	0.755694	1	0.896207	1	0.970529	0.897961	0.842208	0.834841	0.761887	1	0.858219	1	0.857712	0.842533	0.965673	1	0.816708	0.744148	0.77541	0.999567	0.774381	1	0.771119	1
If K>1 set (Na+K)A=KA	0	0	0.327076	0.0138077	0.0175246	0.431333	0.80204	1	0.678562	0.83201	1	1	0.83697	0.717619	0.738798	0.680217	0.576888	0.630002	1	0.9242	1	1	0.738289	1	1	0.755694	1	0.896207	1	0.970529	0.897961	0.842208	0.834841	0.761887	1	0.858219	1	0.857712	0.842533	0.965673	1	0.816708	0.744148	0.77541	0.999567	0.774381	1	0.771119	1
Na(B)	0.0519302	0.0283036	0.0571196	0.00138451	0.0553438	1.01876	0.744133	1.09146	0.893129	1.13488	1.23994	1.04773	0.895542	0.867463	0.864504	0.591432	0.624511	0.762769	1.11317	1.02656	1.0556	1.13236	0.848067	1.13537	1.00995	0.843743	1.12554	0.919966	1.26667	0.960659	0.98749	0.935621	0.864237	0.843514	1.01827	0.930629	1.15811	0.868698	0.82214	0.979276	1.06851	0.937764	0.843208	0.840217	1.02291	0.848702	1.01363	0.830603	1.03618
(Na+K)A	0	0	0.327076	0.0138077	0.0175246	0.431333	0.80204	1	0.678562	0.83201	1	1	0.83697	0.717619	0.738798	0.680217	0.576888	0.630002	1	0.9242	1	1	0.738289	1	1	0.755694	1	0.896207	1	0.970529	0.897961	0.842208	0.834841	0.761887	1	0.858219	1	0.857712	0.842533	0.965673	1	0.816708	0.744148	0.77541	0.999567	0.774381	1	0.771119	1
(Ca+Na)B	0.0806261	0.106504	0.0905643	0.0685444	0.239638	2	1.97602	2.03052	1.83292	2	2.09393	1.93357	2	1.81223	1.81693	2	1.96083	1.98237	1.95593	2	1.92864	2.09801	1.79413	2.04584	2.00917	1.78034	1.97171	2	2.13337	2	1.94303	1.93501	1.93033	1.78343	2.01928	1.94852	1.98792	1.97568	1.92393	2	2.06665	1.87851	1.79378	1.7883	2	1.7877	1.93026	1.78618	2.07089
Mg/(Mg + Fe2+)	0.993327	0.61133	0.989334	0.244798	0.883235	0.979915	1	1	1	0.968168	0.998568	1	0.986081	1	1	0.969828	1	1	1	0.987885	1	0.999273	1	1	0.991221	1	1	0.98558	1	0.99255	1	1	1	1	0.993565	1	1	1	1	0.988431	0.980651	1	1	1	0.999249	1	1	1	0.985083
Fe3+/(Fe3+ + Al vi)	0	0	0	1	0	0.560923	1	1	1	0	1	1	1	1	1	0.901556	1	1	1	1	1	1	1	1	1	1	1	1	1	1	1	1	1	1	1	1	1	1	1	1	1	1	1	1	1	1	1	1	1
Part 10. Amphibole specific names
tremolite	tremolite	FALSE	FALSE	FALSE	FALSE	tremolite	tremolite	tremolite	tremolite	tremolite	tremolite	tremolite	tremolite	tremolite	tremolite	tremolite	tremolite	tremolite	tremolite	tremolite	tremolite	tremolite	tremolite	tremolite	tremolite	tremolite	tremolite	tremolite	tremolite	tremolite	tremolite	tremolite	tremolite	tremolite	tremolite	tremolite	tremolite	tremolite	tremolite	tremolite	tremolite	tremolite	tremolite	tremolite	tremolite	tremolite	tremolite	tremolite	tremolite
actinolite	FALSE	actinolite	FALSE	FALSE	actinolite	FALSE	FALSE	FALSE	FALSE	FALSE	FALSE	FALSE	FALSE	FALSE	FALSE	FALSE	FALSE	FALSE	FALSE	FALSE	FALSE	FALSE	FALSE	FALSE	FALSE	FALSE	FALSE	FALSE	FALSE	FALSE	FALSE	FALSE	FALSE	FALSE	FALSE	FALSE	FALSE	FALSE	FALSE	FALSE	FALSE	FALSE	FALSE	FALSE	FALSE	FALSE	FALSE	FALSE	FALSE
ferro-actinolite	FALSE	FALSE	FALSE	ferro-actinolite	FALSE	FALSE	FALSE	FALSE	FALSE	FALSE	FALSE	FALSE	FALSE	FALSE	FALSE	FALSE	FALSE	FALSE	FALSE	FALSE	FALSE	FALSE	FALSE	FALSE	FALSE	FALSE	FALSE	FALSE	FALSE	FALSE	FALSE	FALSE	FALSE	FALSE	FALSE	FALSE	FALSE	FALSE	FALSE	FALSE	FALSE	FALSE	FALSE	FALSE	FALSE	FALSE	FALSE	FALSE	FALSE
tremolitic hornblende	FALSE	FALSE	FALSE	FALSE	FALSE	FALSE	FALSE	FALSE	FALSE	FALSE	FALSE	FALSE	FALSE	FALSE	FALSE	FALSE	FALSE	FALSE	FALSE	FALSE	FALSE	FALSE	FALSE	FALSE	FALSE	FALSE	FALSE	FALSE	FALSE	FALSE	FALSE	FALSE	FALSE	FALSE	FALSE	FALSE	FALSE	FALSE	FALSE	FALSE	FALSE	FALSE	FALSE	FALSE	FALSE	FALSE	FALSE	FALSE	FALSE
actinolitic hornblende	FALSE	FALSE	FALSE	FALSE	FALSE	FALSE	FALSE	FALSE	FALSE	FALSE	FALSE	FALSE	FALSE	FALSE	FALSE	FALSE	FALSE	FALSE	FALSE	FALSE	FALSE	FALSE	FALSE	FALSE	FALSE	FALSE	FALSE	FALSE	FALSE	FALSE	FALSE	FALSE	FALSE	FALSE	FALSE	FALSE	FALSE	FALSE	FALSE	FALSE	FALSE	FALSE	FALSE	FALSE	FALSE	FALSE	FALSE	FALSE	FALSE
ferro-actinolitic hornblende	FALSE	FALSE	FALSE	FALSE	FALSE	FALSE	FALSE	FALSE	FALSE	FALSE	FALSE	FALSE	FALSE	FALSE	FALSE	FALSE	FALSE	FALSE	FALSE	FALSE	FALSE	FALSE	FALSE	FALSE	FALSE	FALSE	FALSE	FALSE	FALSE	FALSE	FALSE	FALSE	FALSE	FALSE	FALSE	FALSE	FALSE	FALSE	FALSE	FALSE	FALSE	FALSE	FALSE	FALSE	FALSE	FALSE	FALSE	FALSE	FALSE
magnesio-hornblende	FALSE	FALSE	magnesio-hornblende	FALSE	FALSE	FALSE	FALSE	FALSE	FALSE	FALSE	FALSE	FALSE	FALSE	FALSE	FALSE	FALSE	FALSE	FALSE	FALSE	FALSE	FALSE	FALSE	FALSE	FALSE	FALSE	FALSE	FALSE	FALSE	FALSE	FALSE	FALSE	FALSE	FALSE	FALSE	FALSE	FALSE	FALSE	FALSE	FALSE	FALSE	FALSE	FALSE	FALSE	FALSE	FALSE	FALSE	FALSE	FALSE	FALSE
ferro-hornblende	FALSE	FALSE	FALSE	FALSE	FALSE	FALSE	FALSE	FALSE	FALSE	FALSE	FALSE	FALSE	FALSE	FALSE	FALSE	FALSE	FALSE	FALSE	FALSE	FALSE	FALSE	FALSE	FALSE	FALSE	FALSE	FALSE	FALSE	FALSE	FALSE	FALSE	FALSE	FALSE	FALSE	FALSE	FALSE	FALSE	FALSE	FALSE	FALSE	FALSE	FALSE	FALSE	FALSE	FALSE	FALSE	FALSE	FALSE	FALSE	FALSE
tschermakitic hornblende	FALSE	FALSE	FALSE	FALSE	FALSE	FALSE	FALSE	FALSE	FALSE	FALSE	FALSE	FALSE	FALSE	FALSE	FALSE	FALSE	FALSE	FALSE	FALSE	FALSE	FALSE	FALSE	FALSE	FALSE	FALSE	FALSE	FALSE	FALSE	FALSE	FALSE	FALSE	FALSE	FALSE	FALSE	FALSE	FALSE	FALSE	FALSE	FALSE	FALSE	FALSE	FALSE	FALSE	FALSE	FALSE	FALSE	FALSE	FALSE	FALSE
ferro-tschermakitic hornblende	FALSE	FALSE	FALSE	FALSE	FALSE	FALSE	FALSE	FALSE	FALSE	FALSE	FALSE	FALSE	FALSE	FALSE	FALSE	FALSE	FALSE	FALSE	FALSE	FALSE	FALSE	FALSE	FALSE	FALSE	FALSE	FALSE	FALSE	FALSE	FALSE	FALSE	FALSE	FALSE	FALSE	FALSE	FALSE	FALSE	FALSE	FALSE	FALSE	FALSE	FALSE	FALSE	FALSE	FALSE	FALSE	FALSE	FALSE	FALSE	FALSE
tschermakite	FALSE	FALSE	FALSE	FALSE	FALSE	FALSE	FALSE	FALSE	FALSE	FALSE	FALSE	FALSE	FALSE	FALSE	FALSE	FALSE	FALSE	FALSE	FALSE	FALSE	FALSE	FALSE	FALSE	FALSE	FALSE	FALSE	FALSE	FALSE	FALSE	FALSE	FALSE	FALSE	FALSE	FALSE	FALSE	FALSE	FALSE	FALSE	FALSE	FALSE	FALSE	FALSE	FALSE	FALSE	FALSE	FALSE	FALSE	FALSE	FALSE
ferro-tschermakite	FALSE	FALSE	FALSE	FALSE	FALSE	FALSE	FALSE	FALSE	FALSE	FALSE	FALSE	FALSE	FALSE	FALSE	FALSE	FALSE	FALSE	FALSE	FALSE	FALSE	FALSE	FALSE	FALSE	FALSE	FALSE	FALSE	FALSE	FALSE	FALSE	FALSE	FALSE	FALSE	FALSE	FALSE	FALSE	FALSE	FALSE	FALSE	FALSE	FALSE	FALSE	FALSE	FALSE	FALSE	FALSE	FALSE	FALSE	FALSE	FALSE
subsilicic-tschermakite	FALSE	FALSE	FALSE	FALSE	FALSE	FALSE	FALSE	FALSE	FALSE	FALSE	FALSE	FALSE	FALSE	FALSE	FALSE	FALSE	FALSE	FALSE	FALSE	FALSE	FALSE	FALSE	FALSE	FALSE	FALSE	FALSE	FALSE	FALSE	FALSE	FALSE	FALSE	FALSE	FALSE	FALSE	FALSE	FALSE	FALSE	FALSE	FALSE	FALSE	FALSE	FALSE	FALSE	FALSE	FALSE	FALSE	FALSE	FALSE	FALSE
subsilicic ferro-tschermakite	FALSE	FALSE	FALSE	FALSE	FALSE	FALSE	FALSE	FALSE	FALSE	FALSE	FALSE	FALSE	FALSE	FALSE	FALSE	FALSE	FALSE	FALSE	FALSE	FALSE	FALSE	FALSE	FALSE	FALSE	FALSE	FALSE	FALSE	FALSE	FALSE	FALSE	FALSE	FALSE	FALSE	FALSE	FALSE	FALSE	FALSE	FALSE	FALSE	FALSE	FALSE	FALSE	FALSE	FALSE	FALSE	FALSE	FALSE	FALSE	FALSE
silicic edenite	FALSE	silicic edenite	FALSE	FALSE	silicic edenite	FALSE	silicic edenite	silicic edenite	silicic edenite	FALSE	silicic edenite	silicic edenite	silicic edenite	silicic edenite	silicic edenite	silicic edenite	silicic edenite	silicic edenite	silicic edenite	silicic edenite	silicic edenite	silicic edenite	silicic edenite	silicic edenite	silicic edenite	silicic edenite	silicic edenite	silicic edenite	silicic edenite	silicic edenite	silicic edenite	silicic edenite	silicic edenite	silicic edenite	silicic edenite	silicic edenite	silicic edenite	silicic edenite	silicic edenite	silicic edenite	silicic edenite	silicic edenite	silicic edenite	silicic edenite	silicic edenite	silicic edenite	silicic edenite	silicic edenite	silicic edenite
silicic ferro-edenite	FALSE	FALSE	FALSE	silicic ferro-edenite	FALSE	FALSE	FALSE	FALSE	FALSE	FALSE	FALSE	FALSE	FALSE	FALSE	FALSE	FALSE	FALSE	FALSE	FALSE	FALSE	FALSE	FALSE	FALSE	FALSE	FALSE	FALSE	FALSE	FALSE	FALSE	FALSE	FALSE	FALSE	FALSE	FALSE	FALSE	FALSE	FALSE	FALSE	FALSE	FALSE	FALSE	FALSE	FALSE	FALSE	FALSE	FALSE	FALSE	FALSE	FALSE
edenite	FALSE	FALSE	FALSE	FALSE	FALSE	FALSE	FALSE	FALSE	FALSE	FALSE	FALSE	FALSE	FALSE	FALSE	FALSE	FALSE	FALSE	FALSE	FALSE	FALSE	FALSE	FALSE	FALSE	FALSE	FALSE	FALSE	FALSE	FALSE	FALSE	FALSE	FALSE	FALSE	FALSE	FALSE	FALSE	FALSE	FALSE	FALSE	FALSE	FALSE	FALSE	FALSE	FALSE	FALSE	FALSE	FALSE	FALSE	FALSE	FALSE
ferro-edenite	FALSE	FALSE	FALSE	FALSE	FALSE	FALSE	FALSE	FALSE	FALSE	FALSE	FALSE	FALSE	FALSE	FALSE	FALSE	FALSE	FALSE	FALSE	FALSE	FALSE	FALSE	FALSE	FALSE	FALSE	FALSE	FALSE	FALSE	FALSE	FALSE	FALSE	FALSE	FALSE	FALSE	FALSE	FALSE	FALSE	FALSE	FALSE	FALSE	FALSE	FALSE	FALSE	FALSE	FALSE	FALSE	FALSE	FALSE	FALSE	FALSE
edenitic hornblende	FALSE	FALSE	edenitic hornblende	FALSE	FALSE	FALSE	FALSE	FALSE	FALSE	FALSE	FALSE	FALSE	FALSE	FALSE	FALSE	FALSE	FALSE	FALSE	FALSE	FALSE	FALSE	FALSE	FALSE	FALSE	FALSE	FALSE	FALSE	FALSE	FALSE	FALSE	FALSE	FALSE	FALSE	FALSE	FALSE	FALSE	FALSE	FALSE	FALSE	FALSE	FALSE	FALSE	FALSE	FALSE	FALSE	FALSE	FALSE	FALSE	FALSE
ferro-edenitic hornblende	FALSE	FALSE	FALSE	FALSE	FALSE	FALSE	FALSE	FALSE	FALSE	FALSE	FALSE	FALSE	FALSE	FALSE	FALSE	FALSE	FALSE	FALSE	FALSE	FALSE	FALSE	FALSE	FALSE	FALSE	FALSE	FALSE	FALSE	FALSE	FALSE	FALSE	FALSE	FALSE	FALSE	FALSE	FALSE	FALSE	FALSE	FALSE	FALSE	FALSE	FALSE	FALSE	FALSE	FALSE	FALSE	FALSE	FALSE	FALSE	FALSE
pargasitic hornblende	FALSE	FALSE	FALSE	FALSE	FALSE	FALSE	FALSE	FALSE	FALSE	FALSE	FALSE	FALSE	FALSE	FALSE	FALSE	FALSE	FALSE	FALSE	FALSE	FALSE	FALSE	FALSE	FALSE	FALSE	FALSE	FALSE	FALSE	FALSE	FALSE	FALSE	FALSE	FALSE	FALSE	FALSE	FALSE	FALSE	FALSE	FALSE	FALSE	FALSE	FALSE	FALSE	FALSE	FALSE	FALSE	FALSE	FALSE	FALSE	FALSE
ferroan pargasitic hornblende	FALSE	FALSE	FALSE	FALSE	FALSE	FALSE	FALSE	FALSE	FALSE	FALSE	FALSE	FALSE	FALSE	FALSE	FALSE	FALSE	FALSE	FALSE	FALSE	FALSE	FALSE	FALSE	FALSE	FALSE	FALSE	FALSE	FALSE	FALSE	FALSE	FALSE	FALSE	FALSE	FALSE	FALSE	FALSE	FALSE	FALSE	FALSE	FALSE	FALSE	FALSE	FALSE	FALSE	FALSE	FALSE	FALSE	FALSE	FALSE	FALSE
ferro-pargasitic hornblende	FALSE	FALSE	FALSE	FALSE	FALSE	FALSE	FALSE	FALSE	FALSE	FALSE	FALSE	FALSE	FALSE	FALSE	FALSE	FALSE	FALSE	FALSE	FALSE	FALSE	FALSE	FALSE	FALSE	FALSE	FALSE	FALSE	FALSE	FALSE	FALSE	FALSE	FALSE	FALSE	FALSE	FALSE	FALSE	FALSE	FALSE	FALSE	FALSE	FALSE	FALSE	FALSE	FALSE	FALSE	FALSE	FALSE	FALSE	FALSE	FALSE
pargasite	FALSE	FALSE	FALSE	FALSE	FALSE	FALSE	FALSE	FALSE	FALSE	FALSE	FALSE	FALSE	FALSE	FALSE	FALSE	FALSE	FALSE	FALSE	FALSE	FALSE	FALSE	FALSE	FALSE	FALSE	FALSE	FALSE	FALSE	FALSE	FALSE	FALSE	FALSE	FALSE	FALSE	FALSE	FALSE	FALSE	FALSE	FALSE	FALSE	FALSE	FALSE	FALSE	FALSE	FALSE	FALSE	FALSE	FALSE	FALSE	FALSE
ferroan pargasite	FALSE	FALSE	FALSE	FALSE	FALSE	FALSE	FALSE	FALSE	FALSE	FALSE	FALSE	FALSE	FALSE	FALSE	FALSE	FALSE	FALSE	FALSE	FALSE	FALSE	FALSE	FALSE	FALSE	FALSE	FALSE	FALSE	FALSE	FALSE	FALSE	FALSE	FALSE	FALSE	FALSE	FALSE	FALSE	FALSE	FALSE	FALSE	FALSE	FALSE	FALSE	FALSE	FALSE	FALSE	FALSE	FALSE	FALSE	FALSE	FALSE
ferro-pargasite	FALSE	FALSE	FALSE	FALSE	FALSE	FALSE	FALSE	FALSE	FALSE	FALSE	FALSE	FALSE	FALSE	FALSE	FALSE	FALSE	FALSE	FALSE	FALSE	FALSE	FALSE	FALSE	FALSE	FALSE	FALSE	FALSE	FALSE	FALSE	FALSE	FALSE	FALSE	FALSE	FALSE	FALSE	FALSE	FALSE	FALSE	FALSE	FALSE	FALSE	FALSE	FALSE	FALSE	FALSE	FALSE	FALSE	FALSE	FALSE	FALSE
subsilicic pargasite	FALSE	FALSE	FALSE	FALSE	FALSE	FALSE	FALSE	FALSE	FALSE	FALSE	FALSE	FALSE	FALSE	FALSE	FALSE	FALSE	FALSE	FALSE	FALSE	FALSE	FALSE	FALSE	FALSE	FALSE	FALSE	FALSE	FALSE	FALSE	FALSE	FALSE	FALSE	FALSE	FALSE	FALSE	FALSE	FALSE	FALSE	FALSE	FALSE	FALSE	FALSE	FALSE	FALSE	FALSE	FALSE	FALSE	FALSE	FALSE	FALSE
subsilicic ferroan pargasite	FALSE	FALSE	FALSE	FALSE	FALSE	FALSE	FALSE	FALSE	FALSE	FALSE	FALSE	FALSE	FALSE	FALSE	FALSE	FALSE	FALSE	FALSE	FALSE	FALSE	FALSE	FALSE	FALSE	FALSE	FALSE	FALSE	FALSE	FALSE	FALSE	FALSE	FALSE	FALSE	FALSE	FALSE	FALSE	FALSE	FALSE	FALSE	FALSE	FALSE	FALSE	FALSE	FALSE	FALSE	FALSE	FALSE	FALSE	FALSE	FALSE
subsilicic ferro-pargasite	FALSE	FALSE	FALSE	FALSE	FALSE	FALSE	FALSE	FALSE	FALSE	FALSE	FALSE	FALSE	FALSE	FALSE	FALSE	FALSE	FALSE	FALSE	FALSE	FALSE	FALSE	FALSE	FALSE	FALSE	FALSE	FALSE	FALSE	FALSE	FALSE	FALSE	FALSE	FALSE	FALSE	FALSE	FALSE	FALSE	FALSE	FALSE	FALSE	FALSE	FALSE	FALSE	FALSE	FALSE	FALSE	FALSE	FALSE	FALSE	FALSE
magnesio-sadanagaite	FALSE	FALSE	FALSE	FALSE	FALSE	FALSE	FALSE	FALSE	FALSE	FALSE	FALSE	FALSE	FALSE	FALSE	FALSE	FALSE	FALSE	FALSE	FALSE	FALSE	FALSE	FALSE	FALSE	FALSE	FALSE	FALSE	FALSE	FALSE	FALSE	FALSE	FALSE	FALSE	FALSE	FALSE	FALSE	FALSE	FALSE	FALSE	FALSE	FALSE	FALSE	FALSE	FALSE	FALSE	FALSE	FALSE	FALSE	FALSE	FALSE
sadanagaite	FALSE	FALSE	FALSE	FALSE	FALSE	FALSE	FALSE	FALSE	FALSE	FALSE	FALSE	FALSE	FALSE	FALSE	FALSE	FALSE	FALSE	FALSE	FALSE	FALSE	FALSE	FALSE	FALSE	FALSE	FALSE	FALSE	FALSE	FALSE	FALSE	FALSE	FALSE	FALSE	FALSE	FALSE	FALSE	FALSE	FALSE	FALSE	FALSE	FALSE	FALSE	FALSE	FALSE	FALSE	FALSE	FALSE	FALSE	FALSE	FALSE
magnesio-hastingsitic hornblende	FALSE	FALSE	FALSE	FALSE	FALSE	FALSE	FALSE	FALSE	FALSE	FALSE	FALSE	FALSE	FALSE	FALSE	FALSE	FALSE	FALSE	FALSE	FALSE	FALSE	FALSE	FALSE	FALSE	FALSE	FALSE	FALSE	FALSE	FALSE	FALSE	FALSE	FALSE	FALSE	FALSE	FALSE	FALSE	FALSE	FALSE	FALSE	FALSE	FALSE	FALSE	FALSE	FALSE	FALSE	FALSE	FALSE	FALSE	FALSE	FALSE
magnesian hastingsitic hornblende	FALSE	FALSE	FALSE	FALSE	FALSE	FALSE	FALSE	FALSE	FALSE	FALSE	FALSE	FALSE	FALSE	FALSE	FALSE	FALSE	FALSE	FALSE	FALSE	FALSE	FALSE	FALSE	FALSE	FALSE	FALSE	FALSE	FALSE	FALSE	FALSE	FALSE	FALSE	FALSE	FALSE	FALSE	FALSE	FALSE	FALSE	FALSE	FALSE	FALSE	FALSE	FALSE	FALSE	FALSE	FALSE	FALSE	FALSE	FALSE	FALSE
hastingsitic hornblende	FALSE	FALSE	FALSE	FALSE	FALSE	FALSE	FALSE	FALSE	FALSE	FALSE	FALSE	FALSE	FALSE	FALSE	FALSE	FALSE	FALSE	FALSE	FALSE	FALSE	FALSE	FALSE	FALSE	FALSE	FALSE	FALSE	FALSE	FALSE	FALSE	FALSE	FALSE	FALSE	FALSE	FALSE	FALSE	FALSE	FALSE	FALSE	FALSE	FALSE	FALSE	FALSE	FALSE	FALSE	FALSE	FALSE	FALSE	FALSE	FALSE
magnesio-hastingsite	FALSE	FALSE	FALSE	FALSE	FALSE	FALSE	FALSE	FALSE	FALSE	FALSE	FALSE	FALSE	FALSE	FALSE	FALSE	FALSE	FALSE	FALSE	FALSE	FALSE	FALSE	FALSE	FALSE	FALSE	FALSE	FALSE	FALSE	FALSE	FALSE	FALSE	FALSE	FALSE	FALSE	FALSE	FALSE	FALSE	FALSE	FALSE	FALSE	FALSE	FALSE	FALSE	FALSE	FALSE	FALSE	FALSE	FALSE	FALSE	FALSE
magnesian hastingsite	FALSE	FALSE	FALSE	FALSE	FALSE	FALSE	FALSE	FALSE	FALSE	FALSE	FALSE	FALSE	FALSE	FALSE	FALSE	FALSE	FALSE	FALSE	FALSE	FALSE	FALSE	FALSE	FALSE	FALSE	FALSE	FALSE	FALSE	FALSE	FALSE	FALSE	FALSE	FALSE	FALSE	FALSE	FALSE	FALSE	FALSE	FALSE	FALSE	FALSE	FALSE	FALSE	FALSE	FALSE	FALSE	FALSE	FALSE	FALSE	FALSE
hastingsite	FALSE	FALSE	FALSE	FALSE	FALSE	FALSE	FALSE	FALSE	FALSE	FALSE	FALSE	FALSE	FALSE	FALSE	FALSE	FALSE	FALSE	FALSE	FALSE	FALSE	FALSE	FALSE	FALSE	FALSE	FALSE	FALSE	FALSE	FALSE	FALSE	FALSE	FALSE	FALSE	FALSE	FALSE	FALSE	FALSE	FALSE	FALSE	FALSE	FALSE	FALSE	FALSE	FALSE	FALSE	FALSE	FALSE	FALSE	FALSE	FALSE
subsilicic magnesio-hastingsite	FALSE	FALSE	FALSE	FALSE	FALSE	FALSE	FALSE	FALSE	FALSE	FALSE	FALSE	FALSE	FALSE	FALSE	FALSE	FALSE	FALSE	FALSE	FALSE	FALSE	FALSE	FALSE	FALSE	FALSE	FALSE	FALSE	FALSE	FALSE	FALSE	FALSE	FALSE	FALSE	FALSE	FALSE	FALSE	FALSE	FALSE	FALSE	FALSE	FALSE	FALSE	FALSE	FALSE	FALSE	FALSE	FALSE	FALSE	FALSE	FALSE
subsilicic magnesian hastingsite	FALSE	FALSE	FALSE	FALSE	FALSE	FALSE	FALSE	FALSE	FALSE	FALSE	FALSE	FALSE	FALSE	FALSE	FALSE	FALSE	FALSE	FALSE	FALSE	FALSE	FALSE	FALSE	FALSE	FALSE	FALSE	FALSE	FALSE	FALSE	FALSE	FALSE	FALSE	FALSE	FALSE	FALSE	FALSE	FALSE	FALSE	FALSE	FALSE	FALSE	FALSE	FALSE	FALSE	FALSE	FALSE	FALSE	FALSE	FALSE	FALSE
subsilicic hastingsite	FALSE	FALSE	FALSE	FALSE	FALSE	FALSE	FALSE	FALSE	FALSE	FALSE	FALSE	FALSE	FALSE	FALSE	FALSE	FALSE	FALSE	FALSE	FALSE	FALSE	FALSE	FALSE	FALSE	FALSE	FALSE	FALSE	FALSE	FALSE	FALSE	FALSE	FALSE	FALSE	FALSE	FALSE	FALSE	FALSE	FALSE	FALSE	FALSE	FALSE	FALSE	FALSE	FALSE	FALSE	FALSE	FALSE	FALSE	FALSE	FALSE
kaersutite	FALSE	FALSE	FALSE	FALSE	FALSE	FALSE	FALSE	FALSE	FALSE	FALSE	FALSE	FALSE	FALSE	FALSE	FALSE	FALSE	FALSE	FALSE	FALSE	FALSE	FALSE	FALSE	FALSE	FALSE	FALSE	FALSE	FALSE	FALSE	FALSE	FALSE	FALSE	FALSE	FALSE	FALSE	FALSE	FALSE	FALSE	FALSE	FALSE	FALSE	FALSE	FALSE	FALSE	FALSE	FALSE	FALSE	FALSE	FALSE	FALSE
ferro-kaersutite	FALSE	FALSE	FALSE	FALSE	FALSE	FALSE	FALSE	FALSE	FALSE	FALSE	FALSE	FALSE	FALSE	FALSE	FALSE	FALSE	FALSE	FALSE	FALSE	FALSE	FALSE	FALSE	FALSE	FALSE	FALSE	FALSE	FALSE	FALSE	FALSE	FALSE	FALSE	FALSE	FALSE	FALSE	FALSE	FALSE	FALSE	FALSE	FALSE	FALSE	FALSE	FALSE	FALSE	FALSE	FALSE	FALSE	FALSE	FALSE	FALSE
subsilicic kaersutite	FALSE	FALSE	FALSE	FALSE	FALSE	FALSE	FALSE	FALSE	FALSE	FALSE	FALSE	FALSE	FALSE	FALSE	FALSE	FALSE	FALSE	FALSE	FALSE	FALSE	FALSE	FALSE	FALSE	FALSE	FALSE	FALSE	FALSE	FALSE	FALSE	FALSE	FALSE	FALSE	FALSE	FALSE	FALSE	FALSE	FALSE	FALSE	FALSE	FALSE	FALSE	FALSE	FALSE	FALSE	FALSE	FALSE	FALSE	FALSE	FALSE
subsilicic ferro-kaersutite	FALSE	FALSE	FALSE	FALSE	FALSE	FALSE	FALSE	FALSE	FALSE	FALSE	FALSE	FALSE	FALSE	FALSE	FALSE	FALSE	FALSE	FALSE	FALSE	FALSE	FALSE	FALSE	FALSE	FALSE	FALSE	FALSE	FALSE	FALSE	FALSE	FALSE	FALSE	FALSE	FALSE	FALSE	FALSE	FALSE	FALSE	FALSE	FALSE	FALSE	FALSE	FALSE	FALSE	FALSE	FALSE	FALSE	FALSE	FALSE	FALSE
magnesio-anthophyllite	magnesio-anthophyllite	FALSE	FALSE	FALSE	FALSE	magnesio-anthophyllite	magnesio-anthophyllite	magnesio-anthophyllite	magnesio-anthophyllite	magnesio-anthophyllite	magnesio-anthophyllite	magnesio-anthophyllite	magnesio-anthophyllite	magnesio-anthophyllite	magnesio-anthophyllite	magnesio-anthophyllite	magnesio-anthophyllite	magnesio-anthophyllite	magnesio-anthophyllite	magnesio-anthophyllite	magnesio-anthophyllite	magnesio-anthophyllite	magnesio-anthophyllite	magnesio-anthophyllite	magnesio-anthophyllite	magnesio-anthophyllite	magnesio-anthophyllite	magnesio-anthophyllite	magnesio-anthophyllite	magnesio-anthophyllite	magnesio-anthophyllite	magnesio-anthophyllite	magnesio-anthophyllite	magnesio-anthophyllite	magnesio-anthophyllite	magnesio-anthophyllite	magnesio-anthophyllite	magnesio-anthophyllite	magnesio-anthophyllite	magnesio-anthophyllite	magnesio-anthophyllite	magnesio-anthophyllite	magnesio-anthophyllite	magnesio-anthophyllite	magnesio-anthophyllite	magnesio-anthophyllite	magnesio-anthophyllite	magnesio-anthophyllite	magnesio-anthophyllite
anthophyllite	FALSE	anthophyllite	FALSE	anthophyllite	anthophyllite	FALSE	FALSE	FALSE	FALSE	FALSE	FALSE	FALSE	FALSE	FALSE	FALSE	FALSE	FALSE	FALSE	FALSE	FALSE	FALSE	FALSE	FALSE	FALSE	FALSE	FALSE	FALSE	FALSE	FALSE	FALSE	FALSE	FALSE	FALSE	FALSE	FALSE	FALSE	FALSE	FALSE	FALSE	FALSE	FALSE	FALSE	FALSE	FALSE	FALSE	FALSE	FALSE	FALSE	FALSE
ferro-anthophyllite	FALSE	FALSE	FALSE	FALSE	FALSE	FALSE	FALSE	FALSE	FALSE	FALSE	FALSE	FALSE	FALSE	FALSE	FALSE	FALSE	FALSE	FALSE	FALSE	FALSE	FALSE	FALSE	FALSE	FALSE	FALSE	FALSE	FALSE	FALSE	FALSE	FALSE	FALSE	FALSE	FALSE	FALSE	FALSE	FALSE	FALSE	FALSE	FALSE	FALSE	FALSE	FALSE	FALSE	FALSE	FALSE	FALSE	FALSE	FALSE	FALSE
magnesio-gedrite	FALSE	FALSE	magnesio-gedrite	FALSE	FALSE	FALSE	FALSE	FALSE	FALSE	FALSE	FALSE	FALSE	FALSE	FALSE	FALSE	FALSE	FALSE	FALSE	FALSE	FALSE	FALSE	FALSE	FALSE	FALSE	FALSE	FALSE	FALSE	FALSE	FALSE	FALSE	FALSE	FALSE	FALSE	FALSE	FALSE	FALSE	FALSE	FALSE	FALSE	FALSE	FALSE	FALSE	FALSE	FALSE	FALSE	FALSE	FALSE	FALSE	FALSE
gedrite	FALSE	FALSE	FALSE	FALSE	FALSE	FALSE	FALSE	FALSE	FALSE	FALSE	FALSE	FALSE	FALSE	FALSE	FALSE	FALSE	FALSE	FALSE	FALSE	FALSE	FALSE	FALSE	FALSE	FALSE	FALSE	FALSE	FALSE	FALSE	FALSE	FALSE	FALSE	FALSE	FALSE	FALSE	FALSE	FALSE	FALSE	FALSE	FALSE	FALSE	FALSE	FALSE	FALSE	FALSE	FALSE	FALSE	FALSE	FALSE	FALSE
ferro-gedrite	FALSE	FALSE	FALSE	FALSE	FALSE	FALSE	FALSE	FALSE	FALSE	FALSE	FALSE	FALSE	FALSE	FALSE	FALSE	FALSE	FALSE	FALSE	FALSE	FALSE	FALSE	FALSE	FALSE	FALSE	FALSE	FALSE	FALSE	FALSE	FALSE	FALSE	FALSE	FALSE	FALSE	FALSE	FALSE	FALSE	FALSE	FALSE	FALSE	FALSE	FALSE	FALSE	FALSE	FALSE	FALSE	FALSE	FALSE	FALSE	FALSE
magnesio-cummingtonite	magnesio-cummingtonite	FALSE	magnesio-cummingtonite	FALSE	FALSE	magnesio-cummingtonite	magnesio-cummingtonite	magnesio-cummingtonite	magnesio-cummingtonite	magnesio-cummingtonite	magnesio-cummingtonite	magnesio-cummingtonite	magnesio-cummingtonite	magnesio-cummingtonite	magnesio-cummingtonite	magnesio-cummingtonite	magnesio-cummingtonite	magnesio-cummingtonite	magnesio-cummingtonite	magnesio-cummingtonite	magnesio-cummingtonite	magnesio-cummingtonite	magnesio-cummingtonite	magnesio-cummingtonite	magnesio-cummingtonite	magnesio-cummingtonite	magnesio-cummingtonite	magnesio-cummingtonite	magnesio-cummingtonite	magnesio-cummingtonite	magnesio-cummingtonite	magnesio-cummingtonite	magnesio-cummingtonite	magnesio-cummingtonite	magnesio-cummingtonite	magnesio-cummingtonite	magnesio-cummingtonite	magnesio-cummingtonite	magnesio-cummingtonite	magnesio-cummingtonite	magnesio-cummingtonite	magnesio-cummingtonite	magnesio-cummingtonite	magnesio-cummingtonite	magnesio-cummingtonite	magnesio-cummingtonite	magnesio-cummingtonite	magnesio-cummingtonite	magnesio-cummingtonite
cummingtonite	FALSE	cummingtonite	FALSE	FALSE	FALSE	FALSE	FALSE	FALSE	FALSE	FALSE	FALSE	FALSE	FALSE	FALSE	FALSE	FALSE	FALSE	FALSE	FALSE	FALSE	FALSE	FALSE	FALSE	FALSE	FALSE	FALSE	FALSE	FALSE	FALSE	FALSE	FALSE	FALSE	FALSE	FALSE	FALSE	FALSE	FALSE	FALSE	FALSE	FALSE	FALSE	FALSE	FALSE	FALSE	FALSE	FALSE	FALSE	FALSE	FALSE
grunerite	FALSE	FALSE	FALSE	FALSE	FALSE	FALSE	FALSE	FALSE	FALSE	FALSE	FALSE	FALSE	FALSE	FALSE	FALSE	FALSE	FALSE	FALSE	FALSE	FALSE	FALSE	FALSE	FALSE	FALSE	FALSE	FALSE	FALSE	FALSE	FALSE	FALSE	FALSE	FALSE	FALSE	FALSE	FALSE	FALSE	FALSE	FALSE	FALSE	FALSE	FALSE	FALSE	FALSE	FALSE	FALSE	FALSE	FALSE	FALSE	FALSE
dannemoreite	FALSE	FALSE	FALSE	dannemoreite	FALSE	FALSE	FALSE	FALSE	FALSE	FALSE	FALSE	FALSE	FALSE	FALSE	FALSE	FALSE	FALSE	FALSE	FALSE	FALSE	FALSE	FALSE	FALSE	FALSE	FALSE	FALSE	FALSE	FALSE	FALSE	FALSE	FALSE	FALSE	FALSE	FALSE	FALSE	FALSE	FALSE	FALSE	FALSE	FALSE	FALSE	FALSE	FALSE	FALSE	FALSE	FALSE	FALSE	FALSE	FALSE
tirodite	FALSE	FALSE	FALSE	FALSE	tirodite	FALSE	FALSE	FALSE	FALSE	FALSE	FALSE	FALSE	FALSE	FALSE	FALSE	FALSE	FALSE	FALSE	FALSE	FALSE	FALSE	FALSE	FALSE	FALSE	FALSE	FALSE	FALSE	FALSE	FALSE	FALSE	FALSE	FALSE	FALSE	FALSE	FALSE	FALSE	FALSE	FALSE	FALSE	FALSE	FALSE	FALSE	FALSE	FALSE	FALSE	FALSE	FALSE	FALSE	FALSE
winchite	winchite	winchite	FALSE	FALSE	winchite	winchite	winchite	winchite	winchite	winchite	winchite	winchite	winchite	winchite	winchite	winchite	winchite	winchite	winchite	winchite	winchite	winchite	winchite	winchite	winchite	winchite	winchite	winchite	winchite	winchite	winchite	winchite	winchite	winchite	winchite	winchite	winchite	winchite	winchite	winchite	winchite	winchite	winchite	winchite	winchite	winchite	winchite	winchite	winchite
ferro-winchite	FALSE	FALSE	FALSE	ferro-winchite	FALSE	FALSE	FALSE	FALSE	FALSE	FALSE	FALSE	FALSE	FALSE	FALSE	FALSE	FALSE	FALSE	FALSE	FALSE	FALSE	FALSE	FALSE	FALSE	FALSE	FALSE	FALSE	FALSE	FALSE	FALSE	FALSE	FALSE	FALSE	FALSE	FALSE	FALSE	FALSE	FALSE	FALSE	FALSE	FALSE	FALSE	FALSE	FALSE	FALSE	FALSE	FALSE	FALSE	FALSE	FALSE
barroisite	FALSE	FALSE	barroisite	FALSE	FALSE	FALSE	FALSE	FALSE	FALSE	FALSE	FALSE	FALSE	FALSE	FALSE	FALSE	FALSE	FALSE	FALSE	FALSE	FALSE	FALSE	FALSE	FALSE	FALSE	FALSE	FALSE	FALSE	FALSE	FALSE	FALSE	FALSE	FALSE	FALSE	FALSE	FALSE	FALSE	FALSE	FALSE	FALSE	FALSE	FALSE	FALSE	FALSE	FALSE	FALSE	FALSE	FALSE	FALSE	FALSE
ferro-barroisite	FALSE	FALSE	FALSE	FALSE	FALSE	FALSE	FALSE	FALSE	FALSE	FALSE	FALSE	FALSE	FALSE	FALSE	FALSE	FALSE	FALSE	FALSE	FALSE	FALSE	FALSE	FALSE	FALSE	FALSE	FALSE	FALSE	FALSE	FALSE	FALSE	FALSE	FALSE	FALSE	FALSE	FALSE	FALSE	FALSE	FALSE	FALSE	FALSE	FALSE	FALSE	FALSE	FALSE	FALSE	FALSE	FALSE	FALSE	FALSE	FALSE
richterite	richterite	richterite	FALSE	FALSE	richterite	richterite	richterite	richterite	richterite	richterite	richterite	richterite	richterite	richterite	richterite	richterite	richterite	richterite	richterite	richterite	richterite	richterite	richterite	richterite	richterite	richterite	richterite	richterite	richterite	richterite	richterite	richterite	richterite	richterite	richterite	richterite	richterite	richterite	richterite	richterite	richterite	richterite	richterite	richterite	richterite	richterite	richterite	richterite	richterite
ferro-richterite	FALSE	FALSE	FALSE	ferro-richterite	FALSE	FALSE	FALSE	FALSE	FALSE	FALSE	FALSE	FALSE	FALSE	FALSE	FALSE	FALSE	FALSE	FALSE	FALSE	FALSE	FALSE	FALSE	FALSE	FALSE	FALSE	FALSE	FALSE	FALSE	FALSE	FALSE	FALSE	FALSE	FALSE	FALSE	FALSE	FALSE	FALSE	FALSE	FALSE	FALSE	FALSE	FALSE	FALSE	FALSE	FALSE	FALSE	FALSE	FALSE	FALSE
magnesio-kataphorite	FALSE	FALSE	magnesio-kataphorite	FALSE	FALSE	FALSE	FALSE	FALSE	FALSE	FALSE	FALSE	FALSE	FALSE	FALSE	FALSE	FALSE	FALSE	FALSE	FALSE	FALSE	FALSE	FALSE	FALSE	FALSE	FALSE	FALSE	FALSE	FALSE	FALSE	FALSE	FALSE	FALSE	FALSE	FALSE	FALSE	FALSE	FALSE	FALSE	FALSE	FALSE	FALSE	FALSE	FALSE	FALSE	FALSE	FALSE	FALSE	FALSE	FALSE
katophorite	FALSE	FALSE	FALSE	FALSE	FALSE	FALSE	FALSE	FALSE	FALSE	FALSE	FALSE	FALSE	FALSE	FALSE	FALSE	FALSE	FALSE	FALSE	FALSE	FALSE	FALSE	FALSE	FALSE	FALSE	FALSE	FALSE	FALSE	FALSE	FALSE	FALSE	FALSE	FALSE	FALSE	FALSE	FALSE	FALSE	FALSE	FALSE	FALSE	FALSE	FALSE	FALSE	FALSE	FALSE	FALSE	FALSE	FALSE	FALSE	FALSE
magnesio-taramite	FALSE	FALSE	FALSE	FALSE	FALSE	FALSE	FALSE	FALSE	FALSE	FALSE	FALSE	FALSE	FALSE	FALSE	FALSE	FALSE	FALSE	FALSE	FALSE	FALSE	FALSE	FALSE	FALSE	FALSE	FALSE	FALSE	FALSE	FALSE	FALSE	FALSE	FALSE	FALSE	FALSE	FALSE	FALSE	FALSE	FALSE	FALSE	FALSE	FALSE	FALSE	FALSE	FALSE	FALSE	FALSE	FALSE	FALSE	FALSE	FALSE
taramite	FALSE	FALSE	FALSE	FALSE	FALSE	FALSE	FALSE	FALSE	FALSE	FALSE	FALSE	FALSE	FALSE	FALSE	FALSE	FALSE	FALSE	FALSE	FALSE	FALSE	FALSE	FALSE	FALSE	FALSE	FALSE	FALSE	FALSE	FALSE	FALSE	FALSE	FALSE	FALSE	FALSE	FALSE	FALSE	FALSE	FALSE	FALSE	FALSE	FALSE	FALSE	FALSE	FALSE	FALSE	FALSE	FALSE	FALSE	FALSE	FALSE
ferro-eckermannite	FALSE	FALSE	FALSE	FALSE	FALSE	FALSE	FALSE	FALSE	FALSE	FALSE	FALSE	FALSE	FALSE	FALSE	FALSE	FALSE	FALSE	FALSE	FALSE	FALSE	FALSE	FALSE	FALSE	FALSE	FALSE	FALSE	FALSE	FALSE	FALSE	FALSE	FALSE	FALSE	FALSE	FALSE	FALSE	FALSE	FALSE	FALSE	FALSE	FALSE	FALSE	FALSE	FALSE	FALSE	FALSE	FALSE	FALSE	FALSE	FALSE
eckermannite	eckermannite	eckermannite	eckermannite	FALSE	eckermannite	FALSE	FALSE	FALSE	FALSE	eckermannite	FALSE	FALSE	FALSE	FALSE	FALSE	FALSE	FALSE	FALSE	FALSE	FALSE	FALSE	FALSE	FALSE	FALSE	FALSE	FALSE	FALSE	FALSE	FALSE	FALSE	FALSE	FALSE	FALSE	FALSE	FALSE	FALSE	FALSE	FALSE	FALSE	FALSE	FALSE	FALSE	FALSE	FALSE	FALSE	FALSE	FALSE	FALSE	FALSE
arfvedsonite	FALSE	FALSE	FALSE	arfvedsonite	FALSE	FALSE	FALSE	FALSE	FALSE	FALSE	FALSE	FALSE	FALSE	FALSE	FALSE	FALSE	FALSE	FALSE	FALSE	FALSE	FALSE	FALSE	FALSE	FALSE	FALSE	FALSE	FALSE	FALSE	FALSE	FALSE	FALSE	FALSE	FALSE	FALSE	FALSE	FALSE	FALSE	FALSE	FALSE	FALSE	FALSE	FALSE	FALSE	FALSE	FALSE	FALSE	FALSE	FALSE	FALSE
kozulite	FALSE	FALSE	FALSE	FALSE	FALSE	FALSE	FALSE	FALSE	FALSE	FALSE	FALSE	FALSE	FALSE	FALSE	FALSE	FALSE	FALSE	FALSE	FALSE	FALSE	FALSE	FALSE	FALSE	FALSE	FALSE	FALSE	FALSE	FALSE	FALSE	FALSE	FALSE	FALSE	FALSE	FALSE	FALSE	FALSE	FALSE	FALSE	FALSE	FALSE	FALSE	FALSE	FALSE	FALSE	FALSE	FALSE	FALSE	FALSE	FALSE
magnesio-arfvedsonite	FALSE	FALSE	FALSE	FALSE	FALSE	magnesio-arfvedsonite	magnesio-arfvedsonite	magnesio-arfvedsonite	magnesio-arfvedsonite	FALSE	magnesio-arfvedsonite	magnesio-arfvedsonite	magnesio-arfvedsonite	magnesio-arfvedsonite	magnesio-arfvedsonite	magnesio-arfvedsonite	magnesio-arfvedsonite	magnesio-arfvedsonite	magnesio-arfvedsonite	magnesio-arfvedsonite	magnesio-arfvedsonite	magnesio-arfvedsonite	magnesio-arfvedsonite	magnesio-arfvedsonite	magnesio-arfvedsonite	magnesio-arfvedsonite	magnesio-arfvedsonite	magnesio-arfvedsonite	magnesio-arfvedsonite	magnesio-arfvedsonite	magnesio-arfvedsonite	magnesio-arfvedsonite	magnesio-arfvedsonite	magnesio-arfvedsonite	magnesio-arfvedsonite	magnesio-arfvedsonite	magnesio-arfvedsonite	magnesio-arfvedsonite	magnesio-arfvedsonite	magnesio-arfvedsonite	magnesio-arfvedsonite	magnesio-arfvedsonite	magnesio-arfvedsonite	magnesio-arfvedsonite	magnesio-arfvedsonite	magnesio-arfvedsonite	magnesio-arfvedsonite	magnesio-arfvedsonite	magnesio-arfvedsonite
ferro-glaucophane	FALSE	FALSE	FALSE	FALSE	FALSE	FALSE	FALSE	FALSE	FALSE	FALSE	FALSE	FALSE	FALSE	FALSE	FALSE	FALSE	FALSE	FALSE	FALSE	FALSE	FALSE	FALSE	FALSE	FALSE	FALSE	FALSE	FALSE	FALSE	FALSE	FALSE	FALSE	FALSE	FALSE	FALSE	FALSE	FALSE	FALSE	FALSE	FALSE	FALSE	FALSE	FALSE	FALSE	FALSE	FALSE	FALSE	FALSE	FALSE	FALSE
glaucophane	glaucophane	glaucophane	glaucophane	FALSE	glaucophane	FALSE	FALSE	FALSE	FALSE	glaucophane	FALSE	FALSE	FALSE	FALSE	FALSE	FALSE	FALSE	FALSE	FALSE	FALSE	FALSE	FALSE	FALSE	FALSE	FALSE	FALSE	FALSE	FALSE	FALSE	FALSE	FALSE	FALSE	FALSE	FALSE	FALSE	FALSE	FALSE	FALSE	FALSE	FALSE	FALSE	FALSE	FALSE	FALSE	FALSE	FALSE	FALSE	FALSE	FALSE
crossite	FALSE	FALSE	FALSE	FALSE	FALSE	crossite	FALSE	FALSE	FALSE	FALSE	FALSE	FALSE	FALSE	FALSE	FALSE	FALSE	FALSE	FALSE	FALSE	FALSE	FALSE	FALSE	FALSE	FALSE	FALSE	FALSE	FALSE	FALSE	FALSE	FALSE	FALSE	FALSE	FALSE	FALSE	FALSE	FALSE	FALSE	FALSE	FALSE	FALSE	FALSE	FALSE	FALSE	FALSE	FALSE	FALSE	FALSE	FALSE	FALSE
riebeckite	FALSE	FALSE	FALSE	riebeckite	FALSE	FALSE	FALSE	FALSE	FALSE	FALSE	FALSE	FALSE	FALSE	FALSE	FALSE	FALSE	FALSE	FALSE	FALSE	FALSE	FALSE	FALSE	FALSE	FALSE	FALSE	FALSE	FALSE	FALSE	FALSE	FALSE	FALSE	FALSE	FALSE	FALSE	FALSE	FALSE	FALSE	FALSE	FALSE	FALSE	FALSE	FALSE	FALSE	FALSE	FALSE	FALSE	FALSE	FALSE	FALSE
magnesio-riebeckite	FALSE	FALSE	FALSE	FALSE	FALSE	FALSE	magnesio-riebeckite	magnesio-riebeckite	magnesio-riebeckite	FALSE	magnesio-riebeckite	magnesio-riebeckite	magnesio-riebeckite	magnesio-riebeckite	magnesio-riebeckite	magnesio-riebeckite	magnesio-riebeckite	magnesio-riebeckite	magnesio-riebeckite	magnesio-riebeckite	magnesio-riebeckite	magnesio-riebeckite	magnesio-riebeckite	magnesio-riebeckite	magnesio-riebeckite	magnesio-riebeckite	magnesio-riebeckite	magnesio-riebeckite	magnesio-riebeckite	magnesio-riebeckite	magnesio-riebeckite	magnesio-riebeckite	magnesio-riebeckite	magnesio-riebeckite	magnesio-riebeckite	magnesio-riebeckite	magnesio-riebeckite	magnesio-riebeckite	magnesio-riebeckite	magnesio-riebeckite	magnesio-riebeckite	magnesio-riebeckite	magnesio-riebeckite	magnesio-riebeckite	magnesio-riebeckite	magnesio-riebeckite	magnesio-riebeckite	magnesio-riebeckite	magnesio-riebeckite
ferro-nyboite	FALSE	FALSE	FALSE	FALSE	FALSE	FALSE	FALSE	FALSE	FALSE	FALSE	FALSE	FALSE	FALSE	FALSE	FALSE	FALSE	FALSE	FALSE	FALSE	FALSE	FALSE	FALSE	FALSE	FALSE	FALSE	FALSE	FALSE	FALSE	FALSE	FALSE	FALSE	FALSE	FALSE	FALSE	FALSE	FALSE	FALSE	FALSE	FALSE	FALSE	FALSE	FALSE	FALSE	FALSE	FALSE	FALSE	FALSE	FALSE	FALSE
nyboite	nyboite	nyboite	nyboite	FALSE	nyboite	FALSE	FALSE	FALSE	FALSE	nyboite	FALSE	FALSE	FALSE	FALSE	FALSE	FALSE	FALSE	FALSE	FALSE	FALSE	FALSE	FALSE	FALSE	FALSE	FALSE	FALSE	FALSE	FALSE	FALSE	FALSE	FALSE	FALSE	FALSE	FALSE	FALSE	FALSE	FALSE	FALSE	FALSE	FALSE	FALSE	FALSE	FALSE	FALSE	FALSE	FALSE	FALSE	FALSE	FALSE
ferro-anophorite	FALSE	FALSE	FALSE	ferro-anophorite	FALSE	FALSE	FALSE	FALSE	FALSE	FALSE	FALSE	FALSE	FALSE	FALSE	FALSE	FALSE	FALSE	FALSE	FALSE	FALSE	FALSE	FALSE	FALSE	FALSE	FALSE	FALSE	FALSE	FALSE	FALSE	FALSE	FALSE	FALSE	FALSE	FALSE	FALSE	FALSE	FALSE	FALSE	FALSE	FALSE	FALSE	FALSE	FALSE	FALSE	FALSE	FALSE	FALSE	FALSE	FALSE
anophorite	FALSE	FALSE	FALSE	FALSE	FALSE	anophorite	anophorite	anophorite	anophorite	FALSE	anophorite	anophorite	anophorite	anophorite	anophorite	anophorite	anophorite	anophorite	anophorite	anophorite	anophorite	anophorite	anophorite	anophorite	anophorite	anophorite	anophorite	anophorite	anophorite	anophorite	anophorite	anophorite	anophorite	anophorite	anophorite	anophorite	anophorite	anophorite	anophorite	anophorite	anophorite	anophorite	anophorite	anophorite	anophorite	anophorite	anophorite	anophorite	anophorite
Part 11. Find correct amphibole group
Ca amphibole ?	FALSE	FALSE	FALSE	FALSE	FALSE	FALSE	FALSE	FALSE	FALSE	FALSE	FALSE	FALSE	FALSE	FALSE	FALSE	Ca	Ca	FALSE	FALSE	FALSE	FALSE	FALSE	FALSE	FALSE	FALSE	FALSE	FALSE	FALSE	FALSE	FALSE	FALSE	FALSE	FALSE	FALSE	FALSE	FALSE	FALSE	FALSE	FALSE	FALSE	FALSE	FALSE	FALSE	FALSE	FALSE	FALSE	FALSE	FALSE	FALSE
Fe-Mg-Mn amph ?	Fe-Mg-Mn	Fe-Mg-Mn	Fe-Mg-Mn	Fe-Mg-Mn	Fe-Mg-Mn	FALSE	FALSE	FALSE	FALSE	FALSE	FALSE	FALSE	FALSE	FALSE	FALSE	FALSE	FALSE	FALSE	FALSE	FALSE	FALSE	FALSE	FALSE	FALSE	FALSE	FALSE	FALSE	FALSE	FALSE	FALSE	FALSE	FALSE	FALSE	FALSE	FALSE	FALSE	FALSE	FALSE	FALSE	FALSE	FALSE	FALSE	FALSE	FALSE	FALSE	FALSE	FALSE	FALSE	FALSE
Na-Ca amph ?	FALSE	FALSE	FALSE	FALSE	FALSE	Na-Ca	Na-Ca	Na-Ca	Na-Ca	Na-Ca	Na-Ca	Na-Ca	Na-Ca	Na-Ca	Na-Ca	FALSE	FALSE	Na-Ca	Na-Ca	Na-Ca	Na-Ca	Na-Ca	Na-Ca	Na-Ca	Na-Ca	Na-Ca	Na-Ca	Na-Ca	Na-Ca	Na-Ca	Na-Ca	Na-Ca	Na-Ca	Na-Ca	Na-Ca	Na-Ca	Na-Ca	Na-Ca	Na-Ca	Na-Ca	Na-Ca	Na-Ca	Na-Ca	Na-Ca	Na-Ca	Na-Ca	Na-Ca	Na-Ca	Na-Ca
Alkali amph ?	FALSE	FALSE	FALSE	FALSE	FALSE	FALSE	FALSE	FALSE	FALSE	FALSE	FALSE	FALSE	FALSE	FALSE	FALSE	FALSE	FALSE	FALSE	FALSE	FALSE	FALSE	FALSE	FALSE	FALSE	FALSE	FALSE	FALSE	FALSE	FALSE	FALSE	FALSE	FALSE	FALSE	FALSE	FALSE	FALSE	FALSE	FALSE	FALSE	FALSE	FALSE	FALSE	FALSE	FALSE	FALSE	FALSE	FALSE	FALSE	FALSE
Which amph group ?	Fe-Mg-Mn	Fe-Mg-Mn	Fe-Mg-Mn	Fe-Mg-Mn	Fe-Mg-Mn	Na-Ca	Na-Ca	Na-Ca	Na-Ca	Na-Ca	Na-Ca	Na-Ca	Na-Ca	Na-Ca	Na-Ca	Ca	Ca	Na-Ca	Na-Ca	Na-Ca	Na-Ca	Na-Ca	Na-Ca	Na-Ca	Na-Ca	Na-Ca	Na-Ca	Na-Ca	Na-Ca	Na-Ca	Na-Ca	Na-Ca	Na-Ca	Na-Ca	Na-Ca	Na-Ca	Na-Ca	Na-Ca	Na-Ca	Na-Ca	Na-Ca	Na-Ca	Na-Ca	Na-Ca	Na-Ca	Na-Ca	Na-Ca	Na-Ca	Na-Ca
Part 12. Select TRUE name on each diagram
Ca diagram 1	tremoliteЛОЖЬЛОЖЬЛОЖЬЛОЖЬЛОЖЬЛОЖЬЛОЖЬЛОЖЬЛОЖЬЛОЖЬЛОЖЬЛОЖЬЛОЖЬ	ЛОЖЬactinoliteЛОЖЬЛОЖЬЛОЖЬЛОЖЬЛОЖЬЛОЖЬЛОЖЬЛОЖЬЛОЖЬЛОЖЬЛОЖЬЛОЖЬ	ЛОЖЬЛОЖЬЛОЖЬЛОЖЬЛОЖЬЛОЖЬmagnesio-hornblendeЛОЖЬЛОЖЬЛОЖЬЛОЖЬЛОЖЬЛОЖЬЛОЖЬ	ЛОЖЬЛОЖЬferro-actinoliteЛОЖЬЛОЖЬЛОЖЬЛОЖЬЛОЖЬЛОЖЬЛОЖЬЛОЖЬЛОЖЬЛОЖЬЛОЖЬ	ЛОЖЬactinoliteЛОЖЬЛОЖЬЛОЖЬЛОЖЬЛОЖЬЛОЖЬЛОЖЬЛОЖЬЛОЖЬЛОЖЬЛОЖЬЛОЖЬ	tremoliteЛОЖЬЛОЖЬЛОЖЬЛОЖЬЛОЖЬЛОЖЬЛОЖЬЛОЖЬЛОЖЬЛОЖЬЛОЖЬЛОЖЬЛОЖЬ	tremoliteЛОЖЬЛОЖЬЛОЖЬЛОЖЬЛОЖЬЛОЖЬЛОЖЬЛОЖЬЛОЖЬЛОЖЬЛОЖЬЛОЖЬЛОЖЬ	tremoliteЛОЖЬЛОЖЬЛОЖЬЛОЖЬЛОЖЬЛОЖЬЛОЖЬЛОЖЬЛОЖЬЛОЖЬЛОЖЬЛОЖЬЛОЖЬ	tremoliteЛОЖЬЛОЖЬЛОЖЬЛОЖЬЛОЖЬЛОЖЬЛОЖЬЛОЖЬЛОЖЬЛОЖЬЛОЖЬЛОЖЬЛОЖЬ	tremoliteЛОЖЬЛОЖЬЛОЖЬЛОЖЬЛОЖЬЛОЖЬЛОЖЬЛОЖЬЛОЖЬЛОЖЬЛОЖЬЛОЖЬЛОЖЬ	tremoliteЛОЖЬЛОЖЬЛОЖЬЛОЖЬЛОЖЬЛОЖЬЛОЖЬЛОЖЬЛОЖЬЛОЖЬЛОЖЬЛОЖЬЛОЖЬ	tremoliteЛОЖЬЛОЖЬЛОЖЬЛОЖЬЛОЖЬЛОЖЬЛОЖЬЛОЖЬЛОЖЬЛОЖЬЛОЖЬЛОЖЬЛОЖЬ	tremoliteЛОЖЬЛОЖЬЛОЖЬЛОЖЬЛОЖЬЛОЖЬЛОЖЬЛОЖЬЛОЖЬЛОЖЬЛОЖЬЛОЖЬЛОЖЬ	tremoliteЛОЖЬЛОЖЬЛОЖЬЛОЖЬЛОЖЬЛОЖЬЛОЖЬЛОЖЬЛОЖЬЛОЖЬЛОЖЬЛОЖЬЛОЖЬ	tremoliteЛОЖЬЛОЖЬЛОЖЬЛОЖЬЛОЖЬЛОЖЬЛОЖЬЛОЖЬЛОЖЬЛОЖЬЛОЖЬЛОЖЬЛОЖЬ	tremoliteЛОЖЬЛОЖЬЛОЖЬЛОЖЬЛОЖЬЛОЖЬЛОЖЬЛОЖЬЛОЖЬЛОЖЬЛОЖЬЛОЖЬЛОЖЬ	tremoliteЛОЖЬЛОЖЬЛОЖЬЛОЖЬЛОЖЬЛОЖЬЛОЖЬЛОЖЬЛОЖЬЛОЖЬЛОЖЬЛОЖЬЛОЖЬ	tremoliteЛОЖЬЛОЖЬЛОЖЬЛОЖЬЛОЖЬЛОЖЬЛОЖЬЛОЖЬЛОЖЬЛОЖЬЛОЖЬЛОЖЬЛОЖЬ	tremoliteЛОЖЬЛОЖЬЛОЖЬЛОЖЬЛОЖЬЛОЖЬЛОЖЬЛОЖЬЛОЖЬЛОЖЬЛОЖЬЛОЖЬЛОЖЬ	tremoliteЛОЖЬЛОЖЬЛОЖЬЛОЖЬЛОЖЬЛОЖЬЛОЖЬЛОЖЬЛОЖЬЛОЖЬЛОЖЬЛОЖЬЛОЖЬ	tremoliteЛОЖЬЛОЖЬЛОЖЬЛОЖЬЛОЖЬЛОЖЬЛОЖЬЛОЖЬЛОЖЬЛОЖЬЛОЖЬЛОЖЬЛОЖЬ	tremoliteЛОЖЬЛОЖЬЛОЖЬЛОЖЬЛОЖЬЛОЖЬЛОЖЬЛОЖЬЛОЖЬЛОЖЬЛОЖЬЛОЖЬЛОЖЬ	tremoliteЛОЖЬЛОЖЬЛОЖЬЛОЖЬЛОЖЬЛОЖЬЛОЖЬЛОЖЬЛОЖЬЛОЖЬЛОЖЬЛОЖЬЛОЖЬ	tremoliteЛОЖЬЛОЖЬЛОЖЬЛОЖЬЛОЖЬЛОЖЬЛОЖЬЛОЖЬЛОЖЬЛОЖЬЛОЖЬЛОЖЬЛОЖЬ	tremoliteЛОЖЬЛОЖЬЛОЖЬЛОЖЬЛОЖЬЛОЖЬЛОЖЬЛОЖЬЛОЖЬЛОЖЬЛОЖЬЛОЖЬЛОЖЬ	tremoliteЛОЖЬЛОЖЬЛОЖЬЛОЖЬЛОЖЬЛОЖЬЛОЖЬЛОЖЬЛОЖЬЛОЖЬЛОЖЬЛОЖЬЛОЖЬ	tremoliteЛОЖЬЛОЖЬЛОЖЬЛОЖЬЛОЖЬЛОЖЬЛОЖЬЛОЖЬЛОЖЬЛОЖЬЛОЖЬЛОЖЬЛОЖЬ	tremoliteЛОЖЬЛОЖЬЛОЖЬЛОЖЬЛОЖЬЛОЖЬЛОЖЬЛОЖЬЛОЖЬЛОЖЬЛОЖЬЛОЖЬЛОЖЬ	tremoliteЛОЖЬЛОЖЬЛОЖЬЛОЖЬЛОЖЬЛОЖЬЛОЖЬЛОЖЬЛОЖЬЛОЖЬЛОЖЬЛОЖЬЛОЖЬ	tremoliteЛОЖЬЛОЖЬЛОЖЬЛОЖЬЛОЖЬЛОЖЬЛОЖЬЛОЖЬЛОЖЬЛОЖЬЛОЖЬЛОЖЬЛОЖЬ	tremoliteЛОЖЬЛОЖЬЛОЖЬЛОЖЬЛОЖЬЛОЖЬЛОЖЬЛОЖЬЛОЖЬЛОЖЬЛОЖЬЛОЖЬЛОЖЬ	tremoliteЛОЖЬЛОЖЬЛОЖЬЛОЖЬЛОЖЬЛОЖЬЛОЖЬЛОЖЬЛОЖЬЛОЖЬЛОЖЬЛОЖЬЛОЖЬ	tremoliteЛОЖЬЛОЖЬЛОЖЬЛОЖЬЛОЖЬЛОЖЬЛОЖЬЛОЖЬЛОЖЬЛОЖЬЛОЖЬЛОЖЬЛОЖЬ	tremoliteЛОЖЬЛОЖЬЛОЖЬЛОЖЬЛОЖЬЛОЖЬЛОЖЬЛОЖЬЛОЖЬЛОЖЬЛОЖЬЛОЖЬЛОЖЬ	tremoliteЛОЖЬЛОЖЬЛОЖЬЛОЖЬЛОЖЬЛОЖЬЛОЖЬЛОЖЬЛОЖЬЛОЖЬЛОЖЬЛОЖЬЛОЖЬ	tremoliteЛОЖЬЛОЖЬЛОЖЬЛОЖЬЛОЖЬЛОЖЬЛОЖЬЛОЖЬЛОЖЬЛОЖЬЛОЖЬЛОЖЬЛОЖЬ	tremoliteЛОЖЬЛОЖЬЛОЖЬЛОЖЬЛОЖЬЛОЖЬЛОЖЬЛОЖЬЛОЖЬЛОЖЬЛОЖЬЛОЖЬЛОЖЬ	tremoliteЛОЖЬЛОЖЬЛОЖЬЛОЖЬЛОЖЬЛОЖЬЛОЖЬЛОЖЬЛОЖЬЛОЖЬЛОЖЬЛОЖЬЛОЖЬ	tremoliteЛОЖЬЛОЖЬЛОЖЬЛОЖЬЛОЖЬЛОЖЬЛОЖЬЛОЖЬЛОЖЬЛОЖЬЛОЖЬЛОЖЬЛОЖЬ	tremoliteЛОЖЬЛОЖЬЛОЖЬЛОЖЬЛОЖЬЛОЖЬЛОЖЬЛОЖЬЛОЖЬЛОЖЬЛОЖЬЛОЖЬЛОЖЬ	tremoliteЛОЖЬЛОЖЬЛОЖЬЛОЖЬЛОЖЬЛОЖЬЛОЖЬЛОЖЬЛОЖЬЛОЖЬЛОЖЬЛОЖЬЛОЖЬ	tremoliteЛОЖЬЛОЖЬЛОЖЬЛОЖЬЛОЖЬЛОЖЬЛОЖЬЛОЖЬЛОЖЬЛОЖЬЛОЖЬЛОЖЬЛОЖЬ	tremoliteЛОЖЬЛОЖЬЛОЖЬЛОЖЬЛОЖЬЛОЖЬЛОЖЬЛОЖЬЛОЖЬЛОЖЬЛОЖЬЛОЖЬЛОЖЬ	tremoliteЛОЖЬЛОЖЬЛОЖЬЛОЖЬЛОЖЬЛОЖЬЛОЖЬЛОЖЬЛОЖЬЛОЖЬЛОЖЬЛОЖЬЛОЖЬ	tremoliteЛОЖЬЛОЖЬЛОЖЬЛОЖЬЛОЖЬЛОЖЬЛОЖЬЛОЖЬЛОЖЬЛОЖЬЛОЖЬЛОЖЬЛОЖЬ	tremoliteЛОЖЬЛОЖЬЛОЖЬЛОЖЬЛОЖЬЛОЖЬЛОЖЬЛОЖЬЛОЖЬЛОЖЬЛОЖЬЛОЖЬЛОЖЬ	tremoliteЛОЖЬЛОЖЬЛОЖЬЛОЖЬЛОЖЬЛОЖЬЛОЖЬЛОЖЬЛОЖЬЛОЖЬЛОЖЬЛОЖЬЛОЖЬ	tremoliteЛОЖЬЛОЖЬЛОЖЬЛОЖЬЛОЖЬЛОЖЬЛОЖЬЛОЖЬЛОЖЬЛОЖЬЛОЖЬЛОЖЬЛОЖЬ	tremoliteЛОЖЬЛОЖЬЛОЖЬЛОЖЬЛОЖЬЛОЖЬЛОЖЬЛОЖЬЛОЖЬЛОЖЬЛОЖЬЛОЖЬЛОЖЬ
	tremolite	actinolite	magnesio-hornblende	ferro-actinolite	actinolite	tremolite	tremolite	tremolite	tremolite	tremolite	tremolite	tremolite	tremolite	tremolite	tremolite	tremolite	tremolite	tremolite	tremolite	tremolite	tremolite	tremolite	tremolite	tremolite	tremolite	tremolite	tremolite	tremolite	tremolite	tremolite	tremolite	tremolite	tremolite	tremolite	tremolite	tremolite	tremolite	tremolite	tremolite	tremolite	tremolite	tremolite	tremolite	tremolite	tremolite	tremolite	tremolite	tremolite	tremolite
Ca diagram 2	ЛОЖЬЛОЖЬЛОЖЬЛОЖЬЛОЖЬЛОЖЬЛОЖЬЛОЖЬЛОЖЬЛОЖЬЛОЖЬЛОЖЬЛОЖЬЛОЖЬЛОЖЬЛОЖЬЛОЖЬ	silicic edeniteЛОЖЬЛОЖЬЛОЖЬЛОЖЬЛОЖЬЛОЖЬЛОЖЬЛОЖЬЛОЖЬЛОЖЬЛОЖЬЛОЖЬЛОЖЬЛОЖЬЛОЖЬЛОЖЬ	ЛОЖЬЛОЖЬЛОЖЬЛОЖЬedenitic hornblendeЛОЖЬЛОЖЬЛОЖЬЛОЖЬЛОЖЬЛОЖЬЛОЖЬЛОЖЬЛОЖЬЛОЖЬЛОЖЬЛОЖЬ	ЛОЖЬsilicic ferro-edeniteЛОЖЬЛОЖЬЛОЖЬЛОЖЬЛОЖЬЛОЖЬЛОЖЬЛОЖЬЛОЖЬЛОЖЬЛОЖЬЛОЖЬЛОЖЬЛОЖЬЛОЖЬ	silicic edeniteЛОЖЬЛОЖЬЛОЖЬЛОЖЬЛОЖЬЛОЖЬЛОЖЬЛОЖЬЛОЖЬЛОЖЬЛОЖЬЛОЖЬЛОЖЬЛОЖЬЛОЖЬЛОЖЬ	ЛОЖЬЛОЖЬЛОЖЬЛОЖЬЛОЖЬЛОЖЬЛОЖЬЛОЖЬЛОЖЬЛОЖЬЛОЖЬЛОЖЬЛОЖЬЛОЖЬЛОЖЬЛОЖЬЛОЖЬ	silicic edeniteЛОЖЬЛОЖЬЛОЖЬЛОЖЬЛОЖЬЛОЖЬЛОЖЬЛОЖЬЛОЖЬЛОЖЬЛОЖЬЛОЖЬЛОЖЬЛОЖЬЛОЖЬЛОЖЬ	silicic edeniteЛОЖЬЛОЖЬЛОЖЬЛОЖЬЛОЖЬЛОЖЬЛОЖЬЛОЖЬЛОЖЬЛОЖЬЛОЖЬЛОЖЬЛОЖЬЛОЖЬЛОЖЬЛОЖЬ	silicic edeniteЛОЖЬЛОЖЬЛОЖЬЛОЖЬЛОЖЬЛОЖЬЛОЖЬЛОЖЬЛОЖЬЛОЖЬЛОЖЬЛОЖЬЛОЖЬЛОЖЬЛОЖЬЛОЖЬ	ЛОЖЬЛОЖЬЛОЖЬЛОЖЬЛОЖЬЛОЖЬЛОЖЬЛОЖЬЛОЖЬЛОЖЬЛОЖЬЛОЖЬЛОЖЬЛОЖЬЛОЖЬЛОЖЬЛОЖЬ	silicic edeniteЛОЖЬЛОЖЬЛОЖЬЛОЖЬЛОЖЬЛОЖЬЛОЖЬЛОЖЬЛОЖЬЛОЖЬЛОЖЬЛОЖЬЛОЖЬЛОЖЬЛОЖЬЛОЖЬ	silicic edeniteЛОЖЬЛОЖЬЛОЖЬЛОЖЬЛОЖЬЛОЖЬЛОЖЬЛОЖЬЛОЖЬЛОЖЬЛОЖЬЛОЖЬЛОЖЬЛОЖЬЛОЖЬЛОЖЬ	silicic edeniteЛОЖЬЛОЖЬЛОЖЬЛОЖЬЛОЖЬЛОЖЬЛОЖЬЛОЖЬЛОЖЬЛОЖЬЛОЖЬЛОЖЬЛОЖЬЛОЖЬЛОЖЬЛОЖЬ	silicic edeniteЛОЖЬЛОЖЬЛОЖЬЛОЖЬЛОЖЬЛОЖЬЛОЖЬЛОЖЬЛОЖЬЛОЖЬЛОЖЬЛОЖЬЛОЖЬЛОЖЬЛОЖЬЛОЖЬ	silicic edeniteЛОЖЬЛОЖЬЛОЖЬЛОЖЬЛОЖЬЛОЖЬЛОЖЬЛОЖЬЛОЖЬЛОЖЬЛОЖЬЛОЖЬЛОЖЬЛОЖЬЛОЖЬЛОЖЬ	silicic edeniteЛОЖЬЛОЖЬЛОЖЬЛОЖЬЛОЖЬЛОЖЬЛОЖЬЛОЖЬЛОЖЬЛОЖЬЛОЖЬЛОЖЬЛОЖЬЛОЖЬЛОЖЬЛОЖЬ	silicic edeniteЛОЖЬЛОЖЬЛОЖЬЛОЖЬЛОЖЬЛОЖЬЛОЖЬЛОЖЬЛОЖЬЛОЖЬЛОЖЬЛОЖЬЛОЖЬЛОЖЬЛОЖЬЛОЖЬ	silicic edeniteЛОЖЬЛОЖЬЛОЖЬЛОЖЬЛОЖЬЛОЖЬЛОЖЬЛОЖЬЛОЖЬЛОЖЬЛОЖЬЛОЖЬЛОЖЬЛОЖЬЛОЖЬЛОЖЬ	silicic edeniteЛОЖЬЛОЖЬЛОЖЬЛОЖЬЛОЖЬЛОЖЬЛОЖЬЛОЖЬЛОЖЬЛОЖЬЛОЖЬЛОЖЬЛОЖЬЛОЖЬЛОЖЬЛОЖЬ	silicic edeniteЛОЖЬЛОЖЬЛОЖЬЛОЖЬЛОЖЬЛОЖЬЛОЖЬЛОЖЬЛОЖЬЛОЖЬЛОЖЬЛОЖЬЛОЖЬЛОЖЬЛОЖЬЛОЖЬ	silicic edeniteЛОЖЬЛОЖЬЛОЖЬЛОЖЬЛОЖЬЛОЖЬЛОЖЬЛОЖЬЛОЖЬЛОЖЬЛОЖЬЛОЖЬЛОЖЬЛОЖЬЛОЖЬЛОЖЬ	silicic edeniteЛОЖЬЛОЖЬЛОЖЬЛОЖЬЛОЖЬЛОЖЬЛОЖЬЛОЖЬЛОЖЬЛОЖЬЛОЖЬЛОЖЬЛОЖЬЛОЖЬЛОЖЬЛОЖЬ	silicic edeniteЛОЖЬЛОЖЬЛОЖЬЛОЖЬЛОЖЬЛОЖЬЛОЖЬЛОЖЬЛОЖЬЛОЖЬЛОЖЬЛОЖЬЛОЖЬЛОЖЬЛОЖЬЛОЖЬ	silicic edeniteЛОЖЬЛОЖЬЛОЖЬЛОЖЬЛОЖЬЛОЖЬЛОЖЬЛОЖЬЛОЖЬЛОЖЬЛОЖЬЛОЖЬЛОЖЬЛОЖЬЛОЖЬЛОЖЬ	silicic edeniteЛОЖЬЛОЖЬЛОЖЬЛОЖЬЛОЖЬЛОЖЬЛОЖЬЛОЖЬЛОЖЬЛОЖЬЛОЖЬЛОЖЬЛОЖЬЛОЖЬЛОЖЬЛОЖЬ	silicic edeniteЛОЖЬЛОЖЬЛОЖЬЛОЖЬЛОЖЬЛОЖЬЛОЖЬЛОЖЬЛОЖЬЛОЖЬЛОЖЬЛОЖЬЛОЖЬЛОЖЬЛОЖЬЛОЖЬ	silicic edeniteЛОЖЬЛОЖЬЛОЖЬЛОЖЬЛОЖЬЛОЖЬЛОЖЬЛОЖЬЛОЖЬЛОЖЬЛОЖЬЛОЖЬЛОЖЬЛОЖЬЛОЖЬЛОЖЬ	silicic edeniteЛОЖЬЛОЖЬЛОЖЬЛОЖЬЛОЖЬЛОЖЬЛОЖЬЛОЖЬЛОЖЬЛОЖЬЛОЖЬЛОЖЬЛОЖЬЛОЖЬЛОЖЬЛОЖЬ	silicic edeniteЛОЖЬЛОЖЬЛОЖЬЛОЖЬЛОЖЬЛОЖЬЛОЖЬЛОЖЬЛОЖЬЛОЖЬЛОЖЬЛОЖЬЛОЖЬЛОЖЬЛОЖЬЛОЖЬ	silicic edeniteЛОЖЬЛОЖЬЛОЖЬЛОЖЬЛОЖЬЛОЖЬЛОЖЬЛОЖЬЛОЖЬЛОЖЬЛОЖЬЛОЖЬЛОЖЬЛОЖЬЛОЖЬЛОЖЬ	silicic edeniteЛОЖЬЛОЖЬЛОЖЬЛОЖЬЛОЖЬЛОЖЬЛОЖЬЛОЖЬЛОЖЬЛОЖЬЛОЖЬЛОЖЬЛОЖЬЛОЖЬЛОЖЬЛОЖЬ	silicic edeniteЛОЖЬЛОЖЬЛОЖЬЛОЖЬЛОЖЬЛОЖЬЛОЖЬЛОЖЬЛОЖЬЛОЖЬЛОЖЬЛОЖЬЛОЖЬЛОЖЬЛОЖЬЛОЖЬ	silicic edeniteЛОЖЬЛОЖЬЛОЖЬЛОЖЬЛОЖЬЛОЖЬЛОЖЬЛОЖЬЛОЖЬЛОЖЬЛОЖЬЛОЖЬЛОЖЬЛОЖЬЛОЖЬЛОЖЬ	silicic edeniteЛОЖЬЛОЖЬЛОЖЬЛОЖЬЛОЖЬЛОЖЬЛОЖЬЛОЖЬЛОЖЬЛОЖЬЛОЖЬЛОЖЬЛОЖЬЛОЖЬЛОЖЬЛОЖЬ	silicic edeniteЛОЖЬЛОЖЬЛОЖЬЛОЖЬЛОЖЬЛОЖЬЛОЖЬЛОЖЬЛОЖЬЛОЖЬЛОЖЬЛОЖЬЛОЖЬЛОЖЬЛОЖЬЛОЖЬ	silicic edeniteЛОЖЬЛОЖЬЛОЖЬЛОЖЬЛОЖЬЛОЖЬЛОЖЬЛОЖЬЛОЖЬЛОЖЬЛОЖЬЛОЖЬЛОЖЬЛОЖЬЛОЖЬЛОЖЬ	silicic edeniteЛОЖЬЛОЖЬЛОЖЬЛОЖЬЛОЖЬЛОЖЬЛОЖЬЛОЖЬЛОЖЬЛОЖЬЛОЖЬЛОЖЬЛОЖЬЛОЖЬЛОЖЬЛОЖЬ	silicic edeniteЛОЖЬЛОЖЬЛОЖЬЛОЖЬЛОЖЬЛОЖЬЛОЖЬЛОЖЬЛОЖЬЛОЖЬЛОЖЬЛОЖЬЛОЖЬЛОЖЬЛОЖЬЛОЖЬ	silicic edeniteЛОЖЬЛОЖЬЛОЖЬЛОЖЬЛОЖЬЛОЖЬЛОЖЬЛОЖЬЛОЖЬЛОЖЬЛОЖЬЛОЖЬЛОЖЬЛОЖЬЛОЖЬЛОЖЬ	silicic edeniteЛОЖЬЛОЖЬЛОЖЬЛОЖЬЛОЖЬЛОЖЬЛОЖЬЛОЖЬЛОЖЬЛОЖЬЛОЖЬЛОЖЬЛОЖЬЛОЖЬЛОЖЬЛОЖЬ	silicic edeniteЛОЖЬЛОЖЬЛОЖЬЛОЖЬЛОЖЬЛОЖЬЛОЖЬЛОЖЬЛОЖЬЛОЖЬЛОЖЬЛОЖЬЛОЖЬЛОЖЬЛОЖЬЛОЖЬ	silicic edeniteЛОЖЬЛОЖЬЛОЖЬЛОЖЬЛОЖЬЛОЖЬЛОЖЬЛОЖЬЛОЖЬЛОЖЬЛОЖЬЛОЖЬЛОЖЬЛОЖЬЛОЖЬЛОЖЬ	silicic edeniteЛОЖЬЛОЖЬЛОЖЬЛОЖЬЛОЖЬЛОЖЬЛОЖЬЛОЖЬЛОЖЬЛОЖЬЛОЖЬЛОЖЬЛОЖЬЛОЖЬЛОЖЬЛОЖЬ	silicic edeniteЛОЖЬЛОЖЬЛОЖЬЛОЖЬЛОЖЬЛОЖЬЛОЖЬЛОЖЬЛОЖЬЛОЖЬЛОЖЬЛОЖЬЛОЖЬЛОЖЬЛОЖЬЛОЖЬ	silicic edeniteЛОЖЬЛОЖЬЛОЖЬЛОЖЬЛОЖЬЛОЖЬЛОЖЬЛОЖЬЛОЖЬЛОЖЬЛОЖЬЛОЖЬЛОЖЬЛОЖЬЛОЖЬЛОЖЬ	silicic edeniteЛОЖЬЛОЖЬЛОЖЬЛОЖЬЛОЖЬЛОЖЬЛОЖЬЛОЖЬЛОЖЬЛОЖЬЛОЖЬЛОЖЬЛОЖЬЛОЖЬЛОЖЬЛОЖЬ	silicic edeniteЛОЖЬЛОЖЬЛОЖЬЛОЖЬЛОЖЬЛОЖЬЛОЖЬЛОЖЬЛОЖЬЛОЖЬЛОЖЬЛОЖЬЛОЖЬЛОЖЬЛОЖЬЛОЖЬ	silicic edeniteЛОЖЬЛОЖЬЛОЖЬЛОЖЬЛОЖЬЛОЖЬЛОЖЬЛОЖЬЛОЖЬЛОЖЬЛОЖЬЛОЖЬЛОЖЬЛОЖЬЛОЖЬЛОЖЬ	silicic edeniteЛОЖЬЛОЖЬЛОЖЬЛОЖЬЛОЖЬЛОЖЬЛОЖЬЛОЖЬЛОЖЬЛОЖЬЛОЖЬЛОЖЬЛОЖЬЛОЖЬЛОЖЬЛОЖЬ
		silicic edenite	edenitic hornblende	silicic ferro-edenite	silicic edenite		silicic edenite	silicic edenite	silicic edenite		silicic edenite	silicic edenite	silicic edenite	silicic edenite	silicic edenite	silicic edenite	silicic edenite	silicic edenite	silicic edenite	silicic edenite	silicic edenite	silicic edenite	silicic edenite	silicic edenite	silicic edenite	silicic edenite	silicic edenite	silicic edenite	silicic edenite	silicic edenite	silicic edenite	silicic edenite	silicic edenite	silicic edenite	silicic edenite	silicic edenite	silicic edenite	silicic edenite	silicic edenite	silicic edenite	silicic edenite	silicic edenite	silicic edenite	silicic edenite	silicic edenite	silicic edenite	silicic edenite	silicic edenite	silicic edenite
Ca diagram 3	ЛОЖЬЛОЖЬЛОЖЬЛОЖЬЛОЖЬЛОЖЬЛОЖЬЛОЖЬЛОЖЬЛОЖЬЛОЖЬЛОЖЬЛОЖЬЛОЖЬЛОЖЬ	silicic edeniteЛОЖЬЛОЖЬЛОЖЬЛОЖЬЛОЖЬЛОЖЬЛОЖЬЛОЖЬЛОЖЬЛОЖЬЛОЖЬЛОЖЬЛОЖЬЛОЖЬ	ЛОЖЬЛОЖЬЛОЖЬЛОЖЬedenitic hornblendeЛОЖЬЛОЖЬЛОЖЬЛОЖЬЛОЖЬЛОЖЬЛОЖЬЛОЖЬЛОЖЬЛОЖЬ	ЛОЖЬsilicic ferro-edeniteЛОЖЬЛОЖЬЛОЖЬЛОЖЬЛОЖЬЛОЖЬЛОЖЬЛОЖЬЛОЖЬЛОЖЬЛОЖЬЛОЖЬЛОЖЬ	silicic edeniteЛОЖЬЛОЖЬЛОЖЬЛОЖЬЛОЖЬЛОЖЬЛОЖЬЛОЖЬЛОЖЬЛОЖЬЛОЖЬЛОЖЬЛОЖЬЛОЖЬ	ЛОЖЬЛОЖЬЛОЖЬЛОЖЬЛОЖЬЛОЖЬЛОЖЬЛОЖЬЛОЖЬЛОЖЬЛОЖЬЛОЖЬЛОЖЬЛОЖЬЛОЖЬ	silicic edeniteЛОЖЬЛОЖЬЛОЖЬЛОЖЬЛОЖЬЛОЖЬЛОЖЬЛОЖЬЛОЖЬЛОЖЬЛОЖЬЛОЖЬЛОЖЬЛОЖЬ	silicic edeniteЛОЖЬЛОЖЬЛОЖЬЛОЖЬЛОЖЬЛОЖЬЛОЖЬЛОЖЬЛОЖЬЛОЖЬЛОЖЬЛОЖЬЛОЖЬЛОЖЬ	silicic edeniteЛОЖЬЛОЖЬЛОЖЬЛОЖЬЛОЖЬЛОЖЬЛОЖЬЛОЖЬЛОЖЬЛОЖЬЛОЖЬЛОЖЬЛОЖЬЛОЖЬ	ЛОЖЬЛОЖЬЛОЖЬЛОЖЬЛОЖЬЛОЖЬЛОЖЬЛОЖЬЛОЖЬЛОЖЬЛОЖЬЛОЖЬЛОЖЬЛОЖЬЛОЖЬ	silicic edeniteЛОЖЬЛОЖЬЛОЖЬЛОЖЬЛОЖЬЛОЖЬЛОЖЬЛОЖЬЛОЖЬЛОЖЬЛОЖЬЛОЖЬЛОЖЬЛОЖЬ	silicic edeniteЛОЖЬЛОЖЬЛОЖЬЛОЖЬЛОЖЬЛОЖЬЛОЖЬЛОЖЬЛОЖЬЛОЖЬЛОЖЬЛОЖЬЛОЖЬЛОЖЬ	silicic edeniteЛОЖЬЛОЖЬЛОЖЬЛОЖЬЛОЖЬЛОЖЬЛОЖЬЛОЖЬЛОЖЬЛОЖЬЛОЖЬЛОЖЬЛОЖЬЛОЖЬ	silicic edeniteЛОЖЬЛОЖЬЛОЖЬЛОЖЬЛОЖЬЛОЖЬЛОЖЬЛОЖЬЛОЖЬЛОЖЬЛОЖЬЛОЖЬЛОЖЬЛОЖЬ	silicic edeniteЛОЖЬЛОЖЬЛОЖЬЛОЖЬЛОЖЬЛОЖЬЛОЖЬЛОЖЬЛОЖЬЛОЖЬЛОЖЬЛОЖЬЛОЖЬЛОЖЬ	silicic edeniteЛОЖЬЛОЖЬЛОЖЬЛОЖЬЛОЖЬЛОЖЬЛОЖЬЛОЖЬЛОЖЬЛОЖЬЛОЖЬЛОЖЬЛОЖЬЛОЖЬ	silicic edeniteЛОЖЬЛОЖЬЛОЖЬЛОЖЬЛОЖЬЛОЖЬЛОЖЬЛОЖЬЛОЖЬЛОЖЬЛОЖЬЛОЖЬЛОЖЬЛОЖЬ	silicic edeniteЛОЖЬЛОЖЬЛОЖЬЛОЖЬЛОЖЬЛОЖЬЛОЖЬЛОЖЬЛОЖЬЛОЖЬЛОЖЬЛОЖЬЛОЖЬЛОЖЬ	silicic edeniteЛОЖЬЛОЖЬЛОЖЬЛОЖЬЛОЖЬЛОЖЬЛОЖЬЛОЖЬЛОЖЬЛОЖЬЛОЖЬЛОЖЬЛОЖЬЛОЖЬ	silicic edeniteЛОЖЬЛОЖЬЛОЖЬЛОЖЬЛОЖЬЛОЖЬЛОЖЬЛОЖЬЛОЖЬЛОЖЬЛОЖЬЛОЖЬЛОЖЬЛОЖЬ	silicic edeniteЛОЖЬЛОЖЬЛОЖЬЛОЖЬЛОЖЬЛОЖЬЛОЖЬЛОЖЬЛОЖЬЛОЖЬЛОЖЬЛОЖЬЛОЖЬЛОЖЬ	silicic edeniteЛОЖЬЛОЖЬЛОЖЬЛОЖЬЛОЖЬЛОЖЬЛОЖЬЛОЖЬЛОЖЬЛОЖЬЛОЖЬЛОЖЬЛОЖЬЛОЖЬ	silicic edeniteЛОЖЬЛОЖЬЛОЖЬЛОЖЬЛОЖЬЛОЖЬЛОЖЬЛОЖЬЛОЖЬЛОЖЬЛОЖЬЛОЖЬЛОЖЬЛОЖЬ	silicic edeniteЛОЖЬЛОЖЬЛОЖЬЛОЖЬЛОЖЬЛОЖЬЛОЖЬЛОЖЬЛОЖЬЛОЖЬЛОЖЬЛОЖЬЛОЖЬЛОЖЬ	silicic edeniteЛОЖЬЛОЖЬЛОЖЬЛОЖЬЛОЖЬЛОЖЬЛОЖЬЛОЖЬЛОЖЬЛОЖЬЛОЖЬЛОЖЬЛОЖЬЛОЖЬ	silicic edeniteЛОЖЬЛОЖЬЛОЖЬЛОЖЬЛОЖЬЛОЖЬЛОЖЬЛОЖЬЛОЖЬЛОЖЬЛОЖЬЛОЖЬЛОЖЬЛОЖЬ	silicic edeniteЛОЖЬЛОЖЬЛОЖЬЛОЖЬЛОЖЬЛОЖЬЛОЖЬЛОЖЬЛОЖЬЛОЖЬЛОЖЬЛОЖЬЛОЖЬЛОЖЬ	silicic edeniteЛОЖЬЛОЖЬЛОЖЬЛОЖЬЛОЖЬЛОЖЬЛОЖЬЛОЖЬЛОЖЬЛОЖЬЛОЖЬЛОЖЬЛОЖЬЛОЖЬ	silicic edeniteЛОЖЬЛОЖЬЛОЖЬЛОЖЬЛОЖЬЛОЖЬЛОЖЬЛОЖЬЛОЖЬЛОЖЬЛОЖЬЛОЖЬЛОЖЬЛОЖЬ	silicic edeniteЛОЖЬЛОЖЬЛОЖЬЛОЖЬЛОЖЬЛОЖЬЛОЖЬЛОЖЬЛОЖЬЛОЖЬЛОЖЬЛОЖЬЛОЖЬЛОЖЬ	silicic edeniteЛОЖЬЛОЖЬЛОЖЬЛОЖЬЛОЖЬЛОЖЬЛОЖЬЛОЖЬЛОЖЬЛОЖЬЛОЖЬЛОЖЬЛОЖЬЛОЖЬ	silicic edeniteЛОЖЬЛОЖЬЛОЖЬЛОЖЬЛОЖЬЛОЖЬЛОЖЬЛОЖЬЛОЖЬЛОЖЬЛОЖЬЛОЖЬЛОЖЬЛОЖЬ	silicic edeniteЛОЖЬЛОЖЬЛОЖЬЛОЖЬЛОЖЬЛОЖЬЛОЖЬЛОЖЬЛОЖЬЛОЖЬЛОЖЬЛОЖЬЛОЖЬЛОЖЬ	silicic edeniteЛОЖЬЛОЖЬЛОЖЬЛОЖЬЛОЖЬЛОЖЬЛОЖЬЛОЖЬЛОЖЬЛОЖЬЛОЖЬЛОЖЬЛОЖЬЛОЖЬ	silicic edeniteЛОЖЬЛОЖЬЛОЖЬЛОЖЬЛОЖЬЛОЖЬЛОЖЬЛОЖЬЛОЖЬЛОЖЬЛОЖЬЛОЖЬЛОЖЬЛОЖЬ	silicic edeniteЛОЖЬЛОЖЬЛОЖЬЛОЖЬЛОЖЬЛОЖЬЛОЖЬЛОЖЬЛОЖЬЛОЖЬЛОЖЬЛОЖЬЛОЖЬЛОЖЬ	silicic edeniteЛОЖЬЛОЖЬЛОЖЬЛОЖЬЛОЖЬЛОЖЬЛОЖЬЛОЖЬЛОЖЬЛОЖЬЛОЖЬЛОЖЬЛОЖЬЛОЖЬ	silicic edeniteЛОЖЬЛОЖЬЛОЖЬЛОЖЬЛОЖЬЛОЖЬЛОЖЬЛОЖЬЛОЖЬЛОЖЬЛОЖЬЛОЖЬЛОЖЬЛОЖЬ	silicic edeniteЛОЖЬЛОЖЬЛОЖЬЛОЖЬЛОЖЬЛОЖЬЛОЖЬЛОЖЬЛОЖЬЛОЖЬЛОЖЬЛОЖЬЛОЖЬЛОЖЬ	silicic edeniteЛОЖЬЛОЖЬЛОЖЬЛОЖЬЛОЖЬЛОЖЬЛОЖЬЛОЖЬЛОЖЬЛОЖЬЛОЖЬЛОЖЬЛОЖЬЛОЖЬ	silicic edeniteЛОЖЬЛОЖЬЛОЖЬЛОЖЬЛОЖЬЛОЖЬЛОЖЬЛОЖЬЛОЖЬЛОЖЬЛОЖЬЛОЖЬЛОЖЬЛОЖЬ	silicic edeniteЛОЖЬЛОЖЬЛОЖЬЛОЖЬЛОЖЬЛОЖЬЛОЖЬЛОЖЬЛОЖЬЛОЖЬЛОЖЬЛОЖЬЛОЖЬЛОЖЬ	silicic edeniteЛОЖЬЛОЖЬЛОЖЬЛОЖЬЛОЖЬЛОЖЬЛОЖЬЛОЖЬЛОЖЬЛОЖЬЛОЖЬЛОЖЬЛОЖЬЛОЖЬ	silicic edeniteЛОЖЬЛОЖЬЛОЖЬЛОЖЬЛОЖЬЛОЖЬЛОЖЬЛОЖЬЛОЖЬЛОЖЬЛОЖЬЛОЖЬЛОЖЬЛОЖЬ	silicic edeniteЛОЖЬЛОЖЬЛОЖЬЛОЖЬЛОЖЬЛОЖЬЛОЖЬЛОЖЬЛОЖЬЛОЖЬЛОЖЬЛОЖЬЛОЖЬЛОЖЬ	silicic edeniteЛОЖЬЛОЖЬЛОЖЬЛОЖЬЛОЖЬЛОЖЬЛОЖЬЛОЖЬЛОЖЬЛОЖЬЛОЖЬЛОЖЬЛОЖЬЛОЖЬ	silicic edeniteЛОЖЬЛОЖЬЛОЖЬЛОЖЬЛОЖЬЛОЖЬЛОЖЬЛОЖЬЛОЖЬЛОЖЬЛОЖЬЛОЖЬЛОЖЬЛОЖЬ	silicic edeniteЛОЖЬЛОЖЬЛОЖЬЛОЖЬЛОЖЬЛОЖЬЛОЖЬЛОЖЬЛОЖЬЛОЖЬЛОЖЬЛОЖЬЛОЖЬЛОЖЬ	silicic edeniteЛОЖЬЛОЖЬЛОЖЬЛОЖЬЛОЖЬЛОЖЬЛОЖЬЛОЖЬЛОЖЬЛОЖЬЛОЖЬЛОЖЬЛОЖЬЛОЖЬ
		silicic edenite	edenitic hornblende	silicic ferro-edenite	silicic edenite		silicic edenite	silicic edenite	silicic edenite		silicic edenite	silicic edenite	silicic edenite	silicic edenite	silicic edenite	silicic edenite	silicic edenite	silicic edenite	silicic edenite	silicic edenite	silicic edenite	silicic edenite	silicic edenite	silicic edenite	silicic edenite	silicic edenite	silicic edenite	silicic edenite	silicic edenite	silicic edenite	silicic edenite	silicic edenite	silicic edenite	silicic edenite	silicic edenite	silicic edenite	silicic edenite	silicic edenite	silicic edenite	silicic edenite	silicic edenite	silicic edenite	silicic edenite	silicic edenite	silicic edenite	silicic edenite	silicic edenite	silicic edenite	silicic edenite
Ca diagram 4	FALSE	FALSE	FALSE	FALSE	FALSE	FALSE	FALSE	FALSE	FALSE	FALSE	FALSE	FALSE	FALSE	FALSE	FALSE	FALSE	FALSE	FALSE	FALSE	FALSE	FALSE	FALSE	FALSE	FALSE	FALSE	FALSE	FALSE	FALSE	FALSE	FALSE	FALSE	FALSE	FALSE	FALSE	FALSE	FALSE	FALSE	FALSE	FALSE	FALSE	FALSE	FALSE	FALSE	FALSE	FALSE	FALSE	FALSE	FALSE	FALSE
Fe-Mg-Mn orthorhombic diagram	magnesio-anthophyllite	anthophyllite	magnesio-gedrite	anthophyllite	anthophyllite	magnesio-anthophyllite	magnesio-anthophyllite	magnesio-anthophyllite	magnesio-anthophyllite	magnesio-anthophyllite	magnesio-anthophyllite	magnesio-anthophyllite	magnesio-anthophyllite	magnesio-anthophyllite	magnesio-anthophyllite	magnesio-anthophyllite	magnesio-anthophyllite	magnesio-anthophyllite	magnesio-anthophyllite	magnesio-anthophyllite	magnesio-anthophyllite	magnesio-anthophyllite	magnesio-anthophyllite	magnesio-anthophyllite	magnesio-anthophyllite	magnesio-anthophyllite	magnesio-anthophyllite	magnesio-anthophyllite	magnesio-anthophyllite	magnesio-anthophyllite	magnesio-anthophyllite	magnesio-anthophyllite	magnesio-anthophyllite	magnesio-anthophyllite	magnesio-anthophyllite	magnesio-anthophyllite	magnesio-anthophyllite	magnesio-anthophyllite	magnesio-anthophyllite	magnesio-anthophyllite	magnesio-anthophyllite	magnesio-anthophyllite	magnesio-anthophyllite	magnesio-anthophyllite	magnesio-anthophyllite	magnesio-anthophyllite	magnesio-anthophyllite	magnesio-anthophyllite	magnesio-anthophyllite
Fe-Mg-Mn monoclinic diagram	magnesio-cummingtonite	cummingtonite	magnesio-cummingtonite	dannemoreite	tirodite	magnesio-cummingtonite	magnesio-cummingtonite	magnesio-cummingtonite	magnesio-cummingtonite	magnesio-cummingtonite	magnesio-cummingtonite	magnesio-cummingtonite	magnesio-cummingtonite	magnesio-cummingtonite	magnesio-cummingtonite	magnesio-cummingtonite	magnesio-cummingtonite	magnesio-cummingtonite	magnesio-cummingtonite	magnesio-cummingtonite	magnesio-cummingtonite	magnesio-cummingtonite	magnesio-cummingtonite	magnesio-cummingtonite	magnesio-cummingtonite	magnesio-cummingtonite	magnesio-cummingtonite	magnesio-cummingtonite	magnesio-cummingtonite	magnesio-cummingtonite	magnesio-cummingtonite	magnesio-cummingtonite	magnesio-cummingtonite	magnesio-cummingtonite	magnesio-cummingtonite	magnesio-cummingtonite	magnesio-cummingtonite	magnesio-cummingtonite	magnesio-cummingtonite	magnesio-cummingtonite	magnesio-cummingtonite	magnesio-cummingtonite	magnesio-cummingtonite	magnesio-cummingtonite	magnesio-cummingtonite	magnesio-cummingtonite	magnesio-cummingtonite	magnesio-cummingtonite	magnesio-cummingtonite
Na-Ca diagram 1	winchite	winchite	barroisite	ferro-winchite	winchite	winchite	winchite	winchite	winchite	winchite	winchite	winchite	winchite	winchite	winchite	winchite	winchite	winchite	winchite	winchite	winchite	winchite	winchite	winchite	winchite	winchite	winchite	winchite	winchite	winchite	winchite	winchite	winchite	winchite	winchite	winchite	winchite	winchite	winchite	winchite	winchite	winchite	winchite	winchite	winchite	winchite	winchite	winchite	winchite
Na-Ca diagram 2	richterite	richterite	magnesio-kataphorite	ferro-richterite	richterite	richterite	richterite	richterite	richterite	richterite	richterite	richterite	richterite	richterite	richterite	richterite	richterite	richterite	richterite	richterite	richterite	richterite	richterite	richterite	richterite	richterite	richterite	richterite	richterite	richterite	richterite	richterite	richterite	richterite	richterite	richterite	richterite	richterite	richterite	richterite	richterite	richterite	richterite	richterite	richterite	richterite	richterite	richterite	richterite
Alkali diagram 1	nyboite	nyboite	nyboite	ferro-anophorite	nyboite	anophorite	anophorite	anophorite	anophorite	nyboite	anophorite	anophorite	anophorite	anophorite	anophorite	anophorite	anophorite	anophorite	anophorite	anophorite	anophorite	anophorite	anophorite	anophorite	anophorite	anophorite	anophorite	anophorite	anophorite	anophorite	anophorite	anophorite	anophorite	anophorite	anophorite	anophorite	anophorite	anophorite	anophorite	anophorite	anophorite	anophorite	anophorite	anophorite	anophorite	anophorite	anophorite	anophorite	anophorite
Alkali diagram 2	glaucophane	glaucophane	glaucophane	riebeckite	glaucophane	crossite	magnesio-riebeckite	magnesio-riebeckite	magnesio-riebeckite	glaucophane	magnesio-riebeckite	magnesio-riebeckite	magnesio-riebeckite	magnesio-riebeckite	magnesio-riebeckite	magnesio-riebeckite	magnesio-riebeckite	magnesio-riebeckite	magnesio-riebeckite	magnesio-riebeckite	magnesio-riebeckite	magnesio-riebeckite	magnesio-riebeckite	magnesio-riebeckite	magnesio-riebeckite	magnesio-riebeckite	magnesio-riebeckite	magnesio-riebeckite	magnesio-riebeckite	magnesio-riebeckite	magnesio-riebeckite	magnesio-riebeckite	magnesio-riebeckite	magnesio-riebeckite	magnesio-riebeckite	magnesio-riebeckite	magnesio-riebeckite	magnesio-riebeckite	magnesio-riebeckite	magnesio-riebeckite	magnesio-riebeckite	magnesio-riebeckite	magnesio-riebeckite	magnesio-riebeckite	magnesio-riebeckite	magnesio-riebeckite	magnesio-riebeckite	magnesio-riebeckite	magnesio-riebeckite
Alkali diagram 3	eckermannite	eckermannite	eckermannite	arfvedsonite	eckermannite	magnesio-arfvedsonite	magnesio-arfvedsonite	magnesio-arfvedsonite	magnesio-arfvedsonite	eckermannite	magnesio-arfvedsonite	magnesio-arfvedsonite	magnesio-arfvedsonite	magnesio-arfvedsonite	magnesio-arfvedsonite	magnesio-arfvedsonite	magnesio-arfvedsonite	magnesio-arfvedsonite	magnesio-arfvedsonite	magnesio-arfvedsonite	magnesio-arfvedsonite	magnesio-arfvedsonite	magnesio-arfvedsonite	magnesio-arfvedsonite	magnesio-arfvedsonite	magnesio-arfvedsonite	magnesio-arfvedsonite	magnesio-arfvedsonite	magnesio-arfvedsonite	magnesio-arfvedsonite	magnesio-arfvedsonite	magnesio-arfvedsonite	magnesio-arfvedsonite	magnesio-arfvedsonite	magnesio-arfvedsonite	magnesio-arfvedsonite	magnesio-arfvedsonite	magnesio-arfvedsonite	magnesio-arfvedsonite	magnesio-arfvedsonite	magnesio-arfvedsonite	magnesio-arfvedsonite	magnesio-arfvedsonite	magnesio-arfvedsonite	magnesio-arfvedsonite	magnesio-arfvedsonite	magnesio-arfvedsonite	magnesio-arfvedsonite	magnesio-arfvedsonite
Alkali diagram 4 (kozulite)	FALSE	FALSE	FALSE	FALSE	FALSE	FALSE	FALSE	FALSE	FALSE	FALSE	FALSE	FALSE	FALSE	FALSE	FALSE	FALSE	FALSE	FALSE	FALSE	FALSE	FALSE	FALSE	FALSE	FALSE	FALSE	FALSE	FALSE	FALSE	FALSE	FALSE	FALSE	FALSE	FALSE	FALSE	FALSE	FALSE	FALSE	FALSE	FALSE	FALSE	FALSE	FALSE	FALSE	FALSE	FALSE	FALSE	FALSE	FALSE	FALSE
Part 13. Select TRUE name for each group
Ca amph definition	FALSE	FALSE	FALSE	FALSE	FALSE	FALSE	FALSE	FALSE	FALSE	FALSE	FALSE	FALSE	FALSE	FALSE	FALSE	FALSE	FALSE	FALSE	FALSE	FALSE	FALSE	FALSE	FALSE	FALSE	FALSE	FALSE	FALSE	FALSE	FALSE	FALSE	FALSE	FALSE	FALSE	FALSE	FALSE	FALSE	FALSE	FALSE	FALSE	FALSE	FALSE	FALSE	FALSE	FALSE	FALSE	FALSE	FALSE	FALSE	FALSE
	FALSE	FALSE	FALSE	FALSE	FALSE	FALSE	FALSE	FALSE	FALSE	FALSE	FALSE	FALSE	FALSE	FALSE	FALSE	FALSE	FALSE	FALSE	FALSE	FALSE	FALSE	FALSE	FALSE	FALSE	FALSE	FALSE	FALSE	FALSE	FALSE	FALSE	FALSE	FALSE	FALSE	FALSE	FALSE	FALSE	FALSE	FALSE	FALSE	FALSE	FALSE	FALSE	FALSE	FALSE	FALSE	FALSE	FALSE	FALSE	FALSE
	FALSE	FALSE	FALSE	FALSE	FALSE	FALSE	FALSE	FALSE	FALSE	FALSE	FALSE	FALSE	FALSE	FALSE	FALSE	silicic edenite	silicic edenite	FALSE	FALSE	FALSE	FALSE	FALSE	FALSE	FALSE	FALSE	FALSE	FALSE	FALSE	FALSE	FALSE	FALSE	FALSE	FALSE	FALSE	FALSE	FALSE	FALSE	FALSE	FALSE	FALSE	FALSE	FALSE	FALSE	FALSE	FALSE	FALSE	FALSE	FALSE	FALSE
	FALSE	FALSE	FALSE	FALSE	FALSE	FALSE	FALSE	FALSE	FALSE	FALSE	FALSE	FALSE	FALSE	FALSE	FALSE	FALSE	FALSE	FALSE	FALSE	FALSE	FALSE	FALSE	FALSE	FALSE	FALSE	FALSE	FALSE	FALSE	FALSE	FALSE	FALSE	FALSE	FALSE	FALSE	FALSE	FALSE	FALSE	FALSE	FALSE	FALSE	FALSE	FALSE	FALSE	FALSE	FALSE	FALSE	FALSE	FALSE	FALSE
Fe-Mg-Mn definition	FALSE	FALSE	FALSE	dannemoreite	tirodite	FALSE	FALSE	FALSE	FALSE	FALSE	FALSE	FALSE	FALSE	FALSE	FALSE	FALSE	FALSE	FALSE	FALSE	FALSE	FALSE	FALSE	FALSE	FALSE	FALSE	FALSE	FALSE	FALSE	FALSE	FALSE	FALSE	FALSE	FALSE	FALSE	FALSE	FALSE	FALSE	FALSE	FALSE	FALSE	FALSE	FALSE	FALSE	FALSE	FALSE	FALSE	FALSE	FALSE	FALSE
	magnesio-cummingtonite	cummingtonite	magnesio-cummingtonite			magnesio-cummingtonite	magnesio-cummingtonite	magnesio-cummingtonite	magnesio-cummingtonite	magnesio-cummingtonite	magnesio-cummingtonite	magnesio-cummingtonite	magnesio-cummingtonite	magnesio-cummingtonite	magnesio-cummingtonite	magnesio-cummingtonite	magnesio-cummingtonite	magnesio-cummingtonite	magnesio-cummingtonite	magnesio-cummingtonite	magnesio-cummingtonite	magnesio-cummingtonite	magnesio-cummingtonite	magnesio-cummingtonite	magnesio-cummingtonite	magnesio-cummingtonite	magnesio-cummingtonite	magnesio-cummingtonite	magnesio-cummingtonite	magnesio-cummingtonite	magnesio-cummingtonite	magnesio-cummingtonite	magnesio-cummingtonite	magnesio-cummingtonite	magnesio-cummingtonite	magnesio-cummingtonite	magnesio-cummingtonite	magnesio-cummingtonite	magnesio-cummingtonite	magnesio-cummingtonite	magnesio-cummingtonite	magnesio-cummingtonite	magnesio-cummingtonite	magnesio-cummingtonite	magnesio-cummingtonite	magnesio-cummingtonite	magnesio-cummingtonite	magnesio-cummingtonite	magnesio-cummingtonite
Na-Ca amph definition	FALSE	FALSE	FALSE	FALSE	FALSE	winchite	FALSE	FALSE	FALSE	FALSE	FALSE	FALSE	FALSE	FALSE	FALSE	FALSE	FALSE	FALSE	FALSE	FALSE	FALSE	FALSE	FALSE	FALSE	FALSE	FALSE	FALSE	FALSE	FALSE	FALSE	FALSE	FALSE	FALSE	FALSE	FALSE	FALSE	FALSE	FALSE	FALSE	FALSE	FALSE	FALSE	FALSE	FALSE	FALSE	FALSE	FALSE	FALSE	FALSE
	FALSE	FALSE	FALSE	FALSE	FALSE	FALSE	richterite	richterite	richterite	richterite	richterite	richterite	richterite	richterite	richterite	FALSE	FALSE	richterite	richterite	richterite	richterite	richterite	richterite	richterite	richterite	richterite	richterite	richterite	richterite	richterite	richterite	richterite	richterite	richterite	richterite	richterite	richterite	richterite	richterite	richterite	richterite	richterite	richterite	richterite	richterite	richterite	richterite	richterite	richterite
Alkali amph definition	FALSE	FALSE	FALSE	FALSE	FALSE	FALSE	FALSE	FALSE	FALSE	FALSE	FALSE	FALSE	FALSE	FALSE	FALSE	FALSE	FALSE	FALSE	FALSE	FALSE	FALSE	FALSE	FALSE	FALSE	FALSE	FALSE	FALSE	FALSE	FALSE	FALSE	FALSE	FALSE	FALSE	FALSE	FALSE	FALSE	FALSE	FALSE	FALSE	FALSE	FALSE	FALSE	FALSE	FALSE	FALSE	FALSE	FALSE	FALSE	FALSE
	FALSE	FALSE	FALSE	FALSE	FALSE	FALSE	FALSE	FALSE	FALSE	FALSE	FALSE	FALSE	FALSE	FALSE	FALSE	FALSE	FALSE	FALSE	FALSE	FALSE	FALSE	FALSE	FALSE	FALSE	FALSE	FALSE	FALSE	FALSE	FALSE	FALSE	FALSE	FALSE	FALSE	FALSE	FALSE	FALSE	FALSE	FALSE	FALSE	FALSE	FALSE	FALSE	FALSE	FALSE	FALSE	FALSE	FALSE	FALSE	FALSE
	FALSE	FALSE	FALSE	FALSE	FALSE	FALSE	FALSE	FALSE	FALSE	FALSE	FALSE	FALSE	FALSE	FALSE	FALSE	FALSE	FALSE	FALSE	FALSE	FALSE	FALSE	FALSE	FALSE	FALSE	FALSE	FALSE	FALSE	FALSE	FALSE	FALSE	FALSE	FALSE	FALSE	FALSE	FALSE	FALSE	FALSE	FALSE	FALSE	FALSE	FALSE	FALSE	FALSE	FALSE	FALSE	FALSE	FALSE	FALSE	FALSE
	FALSE	FALSE	FALSE	FALSE	FALSE	FALSE	FALSE	FALSE	FALSE	FALSE	FALSE	FALSE	FALSE	FALSE	FALSE	FALSE	FALSE	FALSE	FALSE	FALSE	FALSE	FALSE	FALSE	FALSE	FALSE	FALSE	FALSE	FALSE	FALSE	FALSE	FALSE	FALSE	FALSE	FALSE	FALSE	FALSE	FALSE	FALSE	FALSE	FALSE	FALSE	FALSE	FALSE	FALSE	FALSE	FALSE	FALSE	FALSE	FALSE
Part 14. Decide on fundamental name
Which calcic amphibole	ЛОЖЬЛОЖЬЛОЖЬЛОЖЬ	ЛОЖЬЛОЖЬЛОЖЬЛОЖЬ	ЛОЖЬЛОЖЬЛОЖЬЛОЖЬ	ЛОЖЬЛОЖЬЛОЖЬЛОЖЬ	ЛОЖЬЛОЖЬЛОЖЬЛОЖЬ	ЛОЖЬЛОЖЬЛОЖЬЛОЖЬ	ЛОЖЬЛОЖЬЛОЖЬЛОЖЬ	ЛОЖЬЛОЖЬЛОЖЬЛОЖЬ	ЛОЖЬЛОЖЬЛОЖЬЛОЖЬ	ЛОЖЬЛОЖЬЛОЖЬЛОЖЬ	ЛОЖЬЛОЖЬЛОЖЬЛОЖЬ	ЛОЖЬЛОЖЬЛОЖЬЛОЖЬ	ЛОЖЬЛОЖЬЛОЖЬЛОЖЬ	ЛОЖЬЛОЖЬЛОЖЬЛОЖЬ	ЛОЖЬЛОЖЬЛОЖЬЛОЖЬ	ЛОЖЬЛОЖЬsilicic edeniteЛОЖЬ	ЛОЖЬЛОЖЬsilicic edeniteЛОЖЬ	ЛОЖЬЛОЖЬЛОЖЬЛОЖЬ	ЛОЖЬЛОЖЬЛОЖЬЛОЖЬ	ЛОЖЬЛОЖЬЛОЖЬЛОЖЬ	ЛОЖЬЛОЖЬЛОЖЬЛОЖЬ	ЛОЖЬЛОЖЬЛОЖЬЛОЖЬ	ЛОЖЬЛОЖЬЛОЖЬЛОЖЬ	ЛОЖЬЛОЖЬЛОЖЬЛОЖЬ	ЛОЖЬЛОЖЬЛОЖЬЛОЖЬ	ЛОЖЬЛОЖЬЛОЖЬЛОЖЬ	ЛОЖЬЛОЖЬЛОЖЬЛОЖЬ	ЛОЖЬЛОЖЬЛОЖЬЛОЖЬ	ЛОЖЬЛОЖЬЛОЖЬЛОЖЬ	ЛОЖЬЛОЖЬЛОЖЬЛОЖЬ	ЛОЖЬЛОЖЬЛОЖЬЛОЖЬ	ЛОЖЬЛОЖЬЛОЖЬЛОЖЬ	ЛОЖЬЛОЖЬЛОЖЬЛОЖЬ	ЛОЖЬЛОЖЬЛОЖЬЛОЖЬ	ЛОЖЬЛОЖЬЛОЖЬЛОЖЬ	ЛОЖЬЛОЖЬЛОЖЬЛОЖЬ	ЛОЖЬЛОЖЬЛОЖЬЛОЖЬ	ЛОЖЬЛОЖЬЛОЖЬЛОЖЬ	ЛОЖЬЛОЖЬЛОЖЬЛОЖЬ	ЛОЖЬЛОЖЬЛОЖЬЛОЖЬ	ЛОЖЬЛОЖЬЛОЖЬЛОЖЬ	ЛОЖЬЛОЖЬЛОЖЬЛОЖЬ	ЛОЖЬЛОЖЬЛОЖЬЛОЖЬ	ЛОЖЬЛОЖЬЛОЖЬЛОЖЬ	ЛОЖЬЛОЖЬЛОЖЬЛОЖЬ	ЛОЖЬЛОЖЬЛОЖЬЛОЖЬ	ЛОЖЬЛОЖЬЛОЖЬЛОЖЬ	ЛОЖЬЛОЖЬЛОЖЬЛОЖЬ	ЛОЖЬЛОЖЬЛОЖЬЛОЖЬ
																silicic edenite	silicic edenite
Which Fe-Mg-Mn amphibole	magnesio-anthophyllite	anthophyllite	magnesio-gedrite	dannemoreite	tirodite	FALSE	FALSE	FALSE	FALSE	FALSE	FALSE	FALSE	FALSE	FALSE	FALSE	FALSE	FALSE	FALSE	FALSE	FALSE	FALSE	FALSE	FALSE	FALSE	FALSE	FALSE	FALSE	FALSE	FALSE	FALSE	FALSE	FALSE	FALSE	FALSE	FALSE	FALSE	FALSE	FALSE	FALSE	FALSE	FALSE	FALSE	FALSE	FALSE	FALSE	FALSE	FALSE	FALSE	FALSE
Which Na-Ca amphibole	ЛОЖЬЛОЖЬ	ЛОЖЬЛОЖЬ	ЛОЖЬЛОЖЬ	ЛОЖЬЛОЖЬ	ЛОЖЬЛОЖЬ	winchiteЛОЖЬ	ЛОЖЬrichterite	ЛОЖЬrichterite	ЛОЖЬrichterite	ЛОЖЬrichterite	ЛОЖЬrichterite	ЛОЖЬrichterite	ЛОЖЬrichterite	ЛОЖЬrichterite	ЛОЖЬrichterite	ЛОЖЬЛОЖЬ	ЛОЖЬЛОЖЬ	ЛОЖЬrichterite	ЛОЖЬrichterite	ЛОЖЬrichterite	ЛОЖЬrichterite	ЛОЖЬrichterite	ЛОЖЬrichterite	ЛОЖЬrichterite	ЛОЖЬrichterite	ЛОЖЬrichterite	ЛОЖЬrichterite	ЛОЖЬrichterite	ЛОЖЬrichterite	ЛОЖЬrichterite	ЛОЖЬrichterite	ЛОЖЬrichterite	ЛОЖЬrichterite	ЛОЖЬrichterite	ЛОЖЬrichterite	ЛОЖЬrichterite	ЛОЖЬrichterite	ЛОЖЬrichterite	ЛОЖЬrichterite	ЛОЖЬrichterite	ЛОЖЬrichterite	ЛОЖЬrichterite	ЛОЖЬrichterite	ЛОЖЬrichterite	ЛОЖЬrichterite	ЛОЖЬrichterite	ЛОЖЬrichterite	ЛОЖЬrichterite	ЛОЖЬrichterite
						winchite	richterite	richterite	richterite	richterite	richterite	richterite	richterite	richterite	richterite			richterite	richterite	richterite	richterite	richterite	richterite	richterite	richterite	richterite	richterite	richterite	richterite	richterite	richterite	richterite	richterite	richterite	richterite	richterite	richterite	richterite	richterite	richterite	richterite	richterite	richterite	richterite	richterite	richterite	richterite	richterite	richterite
Which alkali amphibole	ЛОЖЬЛОЖЬЛОЖЬЛОЖЬ	ЛОЖЬЛОЖЬЛОЖЬЛОЖЬ	ЛОЖЬЛОЖЬЛОЖЬЛОЖЬ	ЛОЖЬЛОЖЬЛОЖЬЛОЖЬ	ЛОЖЬЛОЖЬЛОЖЬЛОЖЬ	ЛОЖЬЛОЖЬЛОЖЬЛОЖЬ	ЛОЖЬЛОЖЬЛОЖЬЛОЖЬ	ЛОЖЬЛОЖЬЛОЖЬЛОЖЬ	ЛОЖЬЛОЖЬЛОЖЬЛОЖЬ	ЛОЖЬЛОЖЬЛОЖЬЛОЖЬ	ЛОЖЬЛОЖЬЛОЖЬЛОЖЬ	ЛОЖЬЛОЖЬЛОЖЬЛОЖЬ	ЛОЖЬЛОЖЬЛОЖЬЛОЖЬ	ЛОЖЬЛОЖЬЛОЖЬЛОЖЬ	ЛОЖЬЛОЖЬЛОЖЬЛОЖЬ	ЛОЖЬЛОЖЬЛОЖЬЛОЖЬ	ЛОЖЬЛОЖЬЛОЖЬЛОЖЬ	ЛОЖЬЛОЖЬЛОЖЬЛОЖЬ	ЛОЖЬЛОЖЬЛОЖЬЛОЖЬ	ЛОЖЬЛОЖЬЛОЖЬЛОЖЬ	ЛОЖЬЛОЖЬЛОЖЬЛОЖЬ	ЛОЖЬЛОЖЬЛОЖЬЛОЖЬ	ЛОЖЬЛОЖЬЛОЖЬЛОЖЬ	ЛОЖЬЛОЖЬЛОЖЬЛОЖЬ	ЛОЖЬЛОЖЬЛОЖЬЛОЖЬ	ЛОЖЬЛОЖЬЛОЖЬЛОЖЬ	ЛОЖЬЛОЖЬЛОЖЬЛОЖЬ	ЛОЖЬЛОЖЬЛОЖЬЛОЖЬ	ЛОЖЬЛОЖЬЛОЖЬЛОЖЬ	ЛОЖЬЛОЖЬЛОЖЬЛОЖЬ	ЛОЖЬЛОЖЬЛОЖЬЛОЖЬ	ЛОЖЬЛОЖЬЛОЖЬЛОЖЬ	ЛОЖЬЛОЖЬЛОЖЬЛОЖЬ	ЛОЖЬЛОЖЬЛОЖЬЛОЖЬ	ЛОЖЬЛОЖЬЛОЖЬЛОЖЬ	ЛОЖЬЛОЖЬЛОЖЬЛОЖЬ	ЛОЖЬЛОЖЬЛОЖЬЛОЖЬ	ЛОЖЬЛОЖЬЛОЖЬЛОЖЬ	ЛОЖЬЛОЖЬЛОЖЬЛОЖЬ	ЛОЖЬЛОЖЬЛОЖЬЛОЖЬ	ЛОЖЬЛОЖЬЛОЖЬЛОЖЬ	ЛОЖЬЛОЖЬЛОЖЬЛОЖЬ	ЛОЖЬЛОЖЬЛОЖЬЛОЖЬ	ЛОЖЬЛОЖЬЛОЖЬЛОЖЬ	ЛОЖЬЛОЖЬЛОЖЬЛОЖЬ	ЛОЖЬЛОЖЬЛОЖЬЛОЖЬ	ЛОЖЬЛОЖЬЛОЖЬЛОЖЬ	ЛОЖЬЛОЖЬЛОЖЬЛОЖЬ	ЛОЖЬЛОЖЬЛОЖЬЛОЖЬ
	magnesio-anthophyllite	anthophyllite	magnesio-gedrite	dannemoreite	tirodite	ЛОЖЬwinchite	ЛОЖЬrichterite	ЛОЖЬrichterite	ЛОЖЬrichterite	ЛОЖЬrichterite	ЛОЖЬrichterite	ЛОЖЬrichterite	ЛОЖЬrichterite	ЛОЖЬrichterite	ЛОЖЬrichterite	silicic edeniteЛОЖЬ	silicic edeniteЛОЖЬ	ЛОЖЬrichterite	ЛОЖЬrichterite	ЛОЖЬrichterite	ЛОЖЬrichterite	ЛОЖЬrichterite	ЛОЖЬrichterite	ЛОЖЬrichterite	ЛОЖЬrichterite	ЛОЖЬrichterite	ЛОЖЬrichterite	ЛОЖЬrichterite	ЛОЖЬrichterite	ЛОЖЬrichterite	ЛОЖЬrichterite	ЛОЖЬrichterite	ЛОЖЬrichterite	ЛОЖЬrichterite	ЛОЖЬrichterite	ЛОЖЬrichterite	ЛОЖЬrichterite	ЛОЖЬrichterite	ЛОЖЬrichterite	ЛОЖЬrichterite	ЛОЖЬrichterite	ЛОЖЬrichterite	ЛОЖЬrichterite	ЛОЖЬrichterite	ЛОЖЬrichterite	ЛОЖЬrichterite	ЛОЖЬrichterite	ЛОЖЬrichterite	ЛОЖЬrichterite
Which amphibole	magnesio-anthophyllite	anthophyllite	magnesio-gedrite	dannemoreite	tirodite	winchite	richterite	richterite	richterite	richterite	richterite	richterite	richterite	richterite	richterite	silicic edenite	silicic edenite	richterite	richterite	richterite	richterite	richterite	richterite	richterite	richterite	richterite	richterite	richterite	richterite	richterite	richterite	richterite	richterite	richterite	richterite	richterite	richterite	richterite	richterite	richterite	richterite	richterite	richterite	richterite	richterite	richterite	richterite	richterite	richterite
Part 15. Check for prefixes
chlor-	FALSE	FALSE	FALSE	FALSE	FALSE	FALSE	FALSE	FALSE	FALSE	FALSE	FALSE	FALSE	FALSE	FALSE	FALSE	FALSE	FALSE	FALSE	FALSE	FALSE	FALSE	FALSE	FALSE	FALSE	FALSE	FALSE	FALSE	FALSE	FALSE	FALSE	FALSE	FALSE	FALSE	FALSE	FALSE	FALSE	FALSE	FALSE	FALSE	FALSE	FALSE	FALSE	FALSE	FALSE	FALSE	FALSE	FALSE	FALSE	FALSE
chromium-	FALSE	FALSE	FALSE	FALSE	FALSE	FALSE	FALSE	FALSE	FALSE	FALSE	FALSE	FALSE	FALSE	FALSE	FALSE	FALSE	FALSE	FALSE	FALSE	FALSE	FALSE	FALSE	FALSE	FALSE	FALSE	FALSE	FALSE	FALSE	FALSE	FALSE	FALSE	FALSE	FALSE	FALSE	FALSE	FALSE	FALSE	FALSE	FALSE	FALSE	FALSE	FALSE	FALSE	FALSE	FALSE	FALSE	FALSE	FALSE	FALSE
chromian-	FALSE	FALSE	FALSE	FALSE	FALSE	FALSE	FALSE	FALSE	FALSE	FALSE	FALSE	FALSE	FALSE	FALSE	FALSE	FALSE	FALSE	FALSE	FALSE	FALSE	FALSE	FALSE	FALSE	FALSE	FALSE	FALSE	FALSE	FALSE	FALSE	FALSE	FALSE	FALSE	FALSE	FALSE	FALSE	FALSE	FALSE	FALSE	FALSE	FALSE	FALSE	FALSE	FALSE	FALSE	FALSE	FALSE	FALSE	FALSE	FALSE
check for hastingsites etc.	FALSE	FALSE	FALSE	FALSE	FALSE	FALSE	FALSE	FALSE	FALSE	FALSE	FALSE	FALSE	FALSE	FALSE	FALSE	FALSE	FALSE	FALSE	FALSE	FALSE	FALSE	FALSE	FALSE	FALSE	FALSE	FALSE	FALSE	FALSE	FALSE	FALSE	FALSE	FALSE	FALSE	FALSE	FALSE	FALSE	FALSE	FALSE	FALSE	FALSE	FALSE	FALSE	FALSE	FALSE	FALSE	FALSE	FALSE	FALSE	FALSE
ferri-	FALSE	FALSE	FALSE	FALSE	FALSE	FALSE	FALSE	FALSE	FALSE	FALSE	FALSE	FALSE	FALSE	FALSE	FALSE	FALSE	FALSE	FALSE	FALSE	FALSE	FALSE	FALSE	FALSE	FALSE	FALSE	FALSE	FALSE	FALSE	FALSE	FALSE	FALSE	FALSE	FALSE	FALSE	FALSE	FALSE	FALSE	FALSE	FALSE	FALSE	FALSE	FALSE	FALSE	FALSE	FALSE	FALSE	FALSE	FALSE	FALSE
ferrian-	FALSE	FALSE	FALSE	FALSE	FALSE	FALSE	FALSE	FALSE	FALSE	FALSE	FALSE	FALSE	FALSE	FALSE	FALSE	FALSE	FALSE	FALSE	FALSE	FALSE	FALSE	FALSE	FALSE	FALSE	FALSE	FALSE	FALSE	FALSE	FALSE	FALSE	FALSE	FALSE	FALSE	FALSE	FALSE	FALSE	FALSE	FALSE	FALSE	FALSE	FALSE	FALSE	FALSE	FALSE	FALSE	FALSE	FALSE	FALSE	FALSE
fluor-	FALSE	FALSE	FALSE	FALSE	FALSE	FALSE	FALSE	FALSE	FALSE	FALSE	FALSE	FALSE	FALSE	FALSE	FALSE	FALSE	FALSE	FALSE	FALSE	FALSE	FALSE	FALSE	FALSE	FALSE	FALSE	FALSE	FALSE	FALSE	FALSE	FALSE	FALSE	FALSE	FALSE	FALSE	FALSE	FALSE	FALSE	FALSE	FALSE	FALSE	FALSE	FALSE	FALSE	FALSE	FALSE	FALSE	FALSE	FALSE	FALSE
hydro-	FALSE	FALSE	FALSE	FALSE	FALSE	FALSE	FALSE	FALSE	FALSE	FALSE	FALSE	FALSE	FALSE	FALSE	FALSE	FALSE	FALSE	FALSE	FALSE	FALSE	FALSE	FALSE	FALSE	FALSE	FALSE	FALSE	FALSE	FALSE	FALSE	FALSE	FALSE	FALSE	FALSE	FALSE	FALSE	FALSE	FALSE	FALSE	FALSE	FALSE	FALSE	FALSE	FALSE	FALSE	FALSE	FALSE	FALSE	FALSE	FALSE
lithian-	FALSE	FALSE	FALSE	FALSE	FALSE	FALSE	FALSE	FALSE	FALSE	FALSE	FALSE	FALSE	FALSE	FALSE	FALSE	FALSE	FALSE	FALSE	FALSE	FALSE	FALSE	FALSE	FALSE	FALSE	FALSE	FALSE	FALSE	FALSE	FALSE	FALSE	FALSE	FALSE	FALSE	FALSE	FALSE	FALSE	FALSE	FALSE	FALSE	FALSE	FALSE	FALSE	FALSE	FALSE	FALSE	FALSE	FALSE	FALSE	FALSE
manganese-	FALSE	FALSE	FALSE	FALSE	FALSE	FALSE	FALSE	FALSE	FALSE	FALSE	FALSE	FALSE	FALSE	FALSE	FALSE	FALSE	FALSE	FALSE	FALSE	FALSE	FALSE	FALSE	FALSE	FALSE	FALSE	FALSE	FALSE	FALSE	FALSE	FALSE	FALSE	FALSE	FALSE	FALSE	FALSE	FALSE	FALSE	FALSE	FALSE	FALSE	FALSE	FALSE	FALSE	FALSE	FALSE	FALSE	FALSE	FALSE	FALSE
manganoan-	FALSE	FALSE	FALSE	FALSE	FALSE	FALSE	FALSE	FALSE	FALSE	FALSE	FALSE	FALSE	FALSE	FALSE	FALSE	FALSE	FALSE	FALSE	FALSE	FALSE	FALSE	FALSE	FALSE	FALSE	FALSE	FALSE	FALSE	FALSE	FALSE	FALSE	FALSE	FALSE	FALSE	FALSE	FALSE	FALSE	FALSE	FALSE	FALSE	FALSE	FALSE	FALSE	FALSE	FALSE	FALSE	FALSE	FALSE	FALSE	FALSE
plumbian-	FALSE	FALSE	FALSE	FALSE	FALSE	FALSE	FALSE	FALSE	FALSE	FALSE	FALSE	FALSE	FALSE	FALSE	FALSE	FALSE	FALSE	FALSE	FALSE	FALSE	FALSE	FALSE	FALSE	FALSE	FALSE	FALSE	FALSE	FALSE	FALSE	FALSE	FALSE	FALSE	FALSE	FALSE	FALSE	FALSE	FALSE	FALSE	FALSE	FALSE	FALSE	FALSE	FALSE	FALSE	FALSE	FALSE	FALSE	FALSE	FALSE
titanium-	FALSE	FALSE	FALSE	FALSE	FALSE	FALSE	FALSE	FALSE	FALSE	FALSE	FALSE	FALSE	FALSE	FALSE	FALSE	FALSE	FALSE	FALSE	FALSE	FALSE	FALSE	FALSE	FALSE	FALSE	FALSE	FALSE	FALSE	FALSE	FALSE	FALSE	FALSE	FALSE	FALSE	FALSE	FALSE	FALSE	FALSE	FALSE	FALSE	FALSE	FALSE	FALSE	FALSE	FALSE	FALSE	FALSE	FALSE	FALSE	FALSE
titanian-	FALSE	FALSE	FALSE	FALSE	FALSE	FALSE	FALSE	FALSE	FALSE	FALSE	FALSE	FALSE	FALSE	FALSE	FALSE	FALSE	FALSE	FALSE	FALSE	FALSE	FALSE	FALSE	FALSE	FALSE	FALSE	FALSE	FALSE	FALSE	FALSE	FALSE	FALSE	FALSE	FALSE	FALSE	FALSE	FALSE	FALSE	FALSE	FALSE	FALSE	FALSE	FALSE	FALSE	FALSE	FALSE	FALSE	FALSE	FALSE	FALSE
potassium-	FALSE	FALSE	FALSE	FALSE	FALSE	FALSE	FALSE	FALSE	FALSE	FALSE	FALSE	FALSE	FALSE	FALSE	FALSE	FALSE	FALSE	FALSE	FALSE	FALSE	FALSE	potassium-	FALSE	FALSE	FALSE	FALSE	potassium-	FALSE	FALSE	FALSE	FALSE	FALSE	FALSE	FALSE	FALSE	FALSE	FALSE	FALSE	FALSE	potassium-	FALSE	FALSE	FALSE	FALSE	potassium-	FALSE	FALSE	FALSE	FALSE
potassian-	FALSE	FALSE	FALSE	FALSE	FALSE	FALSE	FALSE	potassian-	FALSE	potassian-	potassian-	potassian-	potassian-	FALSE	FALSE	FALSE	FALSE	FALSE	potassian-	potassian-	potassian-	FALSE	FALSE	potassian-	potassian-	FALSE	FALSE	potassian-	potassian-	potassian-	FALSE	FALSE	FALSE	FALSE	potassian-	potassian-	potassian-	potassian-	FALSE	FALSE	potassian-	FALSE	FALSE	FALSE	FALSE	FALSE	potassian-	FALSE	potassian-
subsilicic-	FALSE	FALSE	FALSE	FALSE	FALSE	FALSE	FALSE	FALSE	FALSE	FALSE	FALSE	FALSE	FALSE	FALSE	FALSE	FALSE	FALSE	FALSE	FALSE	FALSE	FALSE	FALSE	FALSE	FALSE	FALSE	FALSE	FALSE	FALSE	FALSE	FALSE	FALSE	FALSE	FALSE	FALSE	FALSE	FALSE	FALSE	FALSE	FALSE	FALSE	FALSE	FALSE	FALSE	FALSE	FALSE	FALSE	FALSE	FALSE	FALSE
zinc-	FALSE	FALSE	FALSE	FALSE	FALSE	FALSE	FALSE	FALSE	FALSE	FALSE	FALSE	FALSE	FALSE	FALSE	FALSE	FALSE	FALSE	FALSE	FALSE	FALSE	FALSE	FALSE	FALSE	FALSE	FALSE	FALSE	FALSE	FALSE	FALSE	FALSE	FALSE	FALSE	FALSE	FALSE	FALSE	FALSE	FALSE	FALSE	FALSE	FALSE	FALSE	FALSE	FALSE	FALSE	FALSE	FALSE	FALSE	FALSE	FALSE
zincian-	FALSE	FALSE	FALSE	FALSE	FALSE	FALSE	FALSE	FALSE	FALSE	FALSE	FALSE	FALSE	FALSE	FALSE	FALSE	FALSE	FALSE	FALSE	FALSE	FALSE	FALSE	FALSE	FALSE	FALSE	FALSE	FALSE	FALSE	FALSE	FALSE	FALSE	FALSE	FALSE	FALSE	FALSE	FALSE	FALSE	FALSE	FALSE	FALSE	FALSE	FALSE	FALSE	FALSE	FALSE	FALSE	FALSE	FALSE	FALSE	FALSE
nickeloan-	FALSE	FALSE	FALSE	FALSE	FALSE	FALSE	FALSE	FALSE	FALSE	FALSE	FALSE	FALSE	FALSE	FALSE	FALSE	FALSE	FALSE	FALSE	FALSE	FALSE	FALSE	FALSE	FALSE	FALSE	FALSE	FALSE	FALSE	FALSE	FALSE	FALSE	FALSE	FALSE	FALSE	FALSE	FALSE	FALSE	FALSE	FALSE	FALSE	FALSE	FALSE	FALSE	FALSE	FALSE	FALSE	FALSE	FALSE	FALSE	FALSE
barian-	FALSE	FALSE	FALSE	FALSE	FALSE	FALSE	FALSE	FALSE	FALSE	FALSE	FALSE	FALSE	FALSE	FALSE	FALSE	FALSE	FALSE	FALSE	FALSE	FALSE	FALSE	FALSE	FALSE	FALSE	FALSE	FALSE	FALSE	FALSE	FALSE	FALSE	FALSE	FALSE	FALSE	FALSE	FALSE	FALSE	FALSE	FALSE	FALSE	FALSE	FALSE	FALSE	FALSE	FALSE	FALSE	FALSE	FALSE	FALSE	FALSE
strontian-	FALSE	FALSE	FALSE	FALSE	FALSE	FALSE	FALSE	FALSE	FALSE	FALSE	FALSE	FALSE	FALSE	FALSE	FALSE	FALSE	FALSE	FALSE	FALSE	FALSE	FALSE	FALSE	FALSE	FALSE	FALSE	FALSE	FALSE	FALSE	FALSE	FALSE	FALSE	FALSE	FALSE	FALSE	FALSE	FALSE	FALSE	FALSE	FALSE	FALSE	FALSE	FALSE	FALSE	FALSE	FALSE	FALSE	FALSE	FALSE	FALSE
alumino	FALSE	FALSE	FALSE	FALSE	FALSE	FALSE	FALSE	FALSE	FALSE	FALSE	FALSE	FALSE	FALSE	FALSE	FALSE	FALSE	FALSE	FALSE	FALSE	FALSE	FALSE	FALSE	FALSE	FALSE	FALSE	FALSE	FALSE	FALSE	FALSE	FALSE	FALSE	FALSE	FALSE	FALSE	FALSE	FALSE	FALSE	FALSE	FALSE	FALSE	FALSE	FALSE	FALSE	FALSE	FALSE	FALSE	FALSE	FALSE	FALSE
alumino	FALSE	FALSE	FALSE	FALSE	FALSE	FALSE	FALSE	FALSE	FALSE	FALSE	FALSE	FALSE	FALSE	FALSE	FALSE	FALSE	FALSE	FALSE	FALSE	FALSE	FALSE	FALSE	FALSE	FALSE	FALSE	FALSE	FALSE	FALSE	FALSE	FALSE	FALSE	FALSE	FALSE	FALSE	FALSE	FALSE	FALSE	FALSE	FALSE	FALSE	FALSE	FALSE	FALSE	FALSE	FALSE	FALSE	FALSE	FALSE	FALSE
alumino	FALSE	FALSE	FALSE	FALSE	FALSE	FALSE	FALSE	FALSE	FALSE	FALSE	FALSE	FALSE	FALSE	FALSE	FALSE	FALSE	FALSE	FALSE	FALSE	FALSE	FALSE	FALSE	FALSE	FALSE	FALSE	FALSE	FALSE	FALSE	FALSE	FALSE	FALSE	FALSE	FALSE	FALSE	FALSE	FALSE	FALSE	FALSE	FALSE	FALSE	FALSE	FALSE	FALSE	FALSE	FALSE	FALSE	FALSE	FALSE	FALSE
sodium	FALSE	FALSE	FALSE	FALSE	FALSE	FALSE	FALSE	FALSE	FALSE	FALSE	FALSE	FALSE	FALSE	FALSE	FALSE	FALSE	FALSE	FALSE	FALSE	FALSE	FALSE	FALSE	FALSE	FALSE	FALSE	FALSE	FALSE	FALSE	FALSE	FALSE	FALSE	FALSE	FALSE	FALSE	FALSE	FALSE	FALSE	FALSE	FALSE	FALSE	FALSE	FALSE	FALSE	FALSE	FALSE	FALSE	FALSE	FALSE	FALSE
sodium	FALSE	FALSE	FALSE	FALSE	FALSE	FALSE	FALSE	FALSE	FALSE	FALSE	FALSE	FALSE	FALSE	FALSE	FALSE	FALSE	FALSE	FALSE	FALSE	FALSE	FALSE	FALSE	FALSE	FALSE	FALSE	FALSE	FALSE	FALSE	FALSE	FALSE	FALSE	FALSE	FALSE	FALSE	FALSE	FALSE	FALSE	FALSE	FALSE	FALSE	FALSE	FALSE	FALSE	FALSE	FALSE	FALSE	FALSE	FALSE	FALSE
sodian	FALSE	FALSE	sodian	FALSE	FALSE	FALSE	FALSE	FALSE	FALSE	FALSE	FALSE	FALSE	FALSE	FALSE	FALSE	FALSE	FALSE	FALSE	FALSE	FALSE	FALSE	FALSE	FALSE	FALSE	FALSE	FALSE	FALSE	FALSE	FALSE	FALSE	FALSE	FALSE	FALSE	FALSE	FALSE	FALSE	FALSE	FALSE	FALSE	FALSE	FALSE	FALSE	FALSE	FALSE	FALSE	FALSE	FALSE	FALSE	FALSE
sodian	FALSE	FALSE	FALSE	FALSE	FALSE	FALSE	FALSE	FALSE	FALSE	FALSE	FALSE	FALSE	FALSE	FALSE	FALSE	sodian	sodian	FALSE	FALSE	FALSE	FALSE	FALSE	FALSE	FALSE	FALSE	FALSE	FALSE	FALSE	FALSE	FALSE	FALSE	FALSE	FALSE	FALSE	FALSE	FALSE	FALSE	FALSE	FALSE	FALSE	FALSE	FALSE	FALSE	FALSE	FALSE	FALSE	FALSE	FALSE	FALSE
subcalcic	FALSE	FALSE	FALSE	FALSE	FALSE	FALSE	FALSE	FALSE	FALSE	FALSE	FALSE	FALSE	FALSE	FALSE	FALSE	subcalcic	subcalcic	FALSE	FALSE	FALSE	FALSE	FALSE	FALSE	FALSE	FALSE	FALSE	FALSE	FALSE	FALSE	FALSE	FALSE	FALSE	FALSE	FALSE	FALSE	FALSE	FALSE	FALSE	FALSE	FALSE	FALSE	FALSE	FALSE	FALSE	FALSE	FALSE	FALSE	FALSE	FALSE
calcian	FALSE	FALSE	FALSE	FALSE	FALSE	FALSE	FALSE	FALSE	FALSE	FALSE	FALSE	FALSE	FALSE	FALSE	FALSE	FALSE	FALSE	FALSE	FALSE	FALSE	FALSE	FALSE	FALSE	FALSE	FALSE	FALSE	FALSE	FALSE	FALSE	FALSE	FALSE	FALSE	FALSE	FALSE	FALSE	FALSE	FALSE	FALSE	FALSE	FALSE	FALSE	FALSE	FALSE	FALSE	FALSE	FALSE	FALSE	FALSE	FALSE
calcian	FALSE	FALSE	FALSE	FALSE	FALSE	FALSE	FALSE	FALSE	FALSE	FALSE	FALSE	FALSE	FALSE	FALSE	FALSE	FALSE	FALSE	FALSE	FALSE	FALSE	FALSE	FALSE	FALSE	FALSE	FALSE	FALSE	FALSE	FALSE	FALSE	FALSE	FALSE	FALSE	FALSE	FALSE	FALSE	FALSE	FALSE	FALSE	FALSE	FALSE	FALSE	FALSE	FALSE	FALSE	FALSE	FALSE	FALSE	FALSE	FALSE
silica-poor	FALSE	FALSE	FALSE	FALSE	FALSE	FALSE	FALSE	FALSE	FALSE	FALSE	FALSE	FALSE	FALSE	FALSE	FALSE	FALSE	FALSE	FALSE	FALSE	FALSE	FALSE	FALSE	FALSE	FALSE	FALSE	FALSE	FALSE	FALSE	FALSE	FALSE	FALSE	FALSE	FALSE	FALSE	FALSE	FALSE	FALSE	FALSE	FALSE	FALSE	FALSE	FALSE	FALSE	FALSE	FALSE	FALSE	FALSE	FALSE	FALSE
Part 16. Select TRUE prefixes and tidy	ЛОЖЬЛОЖЬЛОЖЬЛОЖЬЛОЖЬЛОЖЬЛОЖЬЛОЖЬЛОЖЬЛОЖЬЛОЖЬЛОЖЬЛОЖЬЛОЖЬЛОЖЬЛОЖЬЛОЖЬЛОЖЬЛОЖЬЛОЖЬ	ЛОЖЬЛОЖЬЛОЖЬЛОЖЬЛОЖЬЛОЖЬЛОЖЬЛОЖЬЛОЖЬЛОЖЬЛОЖЬЛОЖЬЛОЖЬЛОЖЬЛОЖЬЛОЖЬЛОЖЬЛОЖЬЛОЖЬЛОЖЬ	ЛОЖЬЛОЖЬЛОЖЬЛОЖЬЛОЖЬЛОЖЬЛОЖЬЛОЖЬЛОЖЬЛОЖЬЛОЖЬЛОЖЬЛОЖЬЛОЖЬЛОЖЬЛОЖЬЛОЖЬЛОЖЬЛОЖЬЛОЖЬ	ЛОЖЬЛОЖЬЛОЖЬЛОЖЬЛОЖЬЛОЖЬЛОЖЬЛОЖЬЛОЖЬЛОЖЬЛОЖЬЛОЖЬЛОЖЬЛОЖЬЛОЖЬЛОЖЬЛОЖЬЛОЖЬЛОЖЬЛОЖЬ	ЛОЖЬЛОЖЬЛОЖЬЛОЖЬЛОЖЬЛОЖЬЛОЖЬЛОЖЬЛОЖЬЛОЖЬЛОЖЬЛОЖЬЛОЖЬЛОЖЬЛОЖЬЛОЖЬЛОЖЬЛОЖЬЛОЖЬЛОЖЬ	ЛОЖЬЛОЖЬЛОЖЬЛОЖЬЛОЖЬЛОЖЬЛОЖЬЛОЖЬЛОЖЬЛОЖЬЛОЖЬЛОЖЬЛОЖЬЛОЖЬЛОЖЬЛОЖЬЛОЖЬЛОЖЬЛОЖЬЛОЖЬ	ЛОЖЬЛОЖЬЛОЖЬЛОЖЬЛОЖЬЛОЖЬЛОЖЬЛОЖЬЛОЖЬЛОЖЬЛОЖЬЛОЖЬЛОЖЬЛОЖЬЛОЖЬЛОЖЬЛОЖЬЛОЖЬЛОЖЬЛОЖЬ	ЛОЖЬЛОЖЬЛОЖЬЛОЖЬЛОЖЬЛОЖЬЛОЖЬЛОЖЬЛОЖЬЛОЖЬЛОЖЬЛОЖЬЛОЖЬЛОЖЬЛОЖЬЛОЖЬpotassian-ЛОЖЬЛОЖЬЛОЖЬ	ЛОЖЬЛОЖЬЛОЖЬЛОЖЬЛОЖЬЛОЖЬЛОЖЬЛОЖЬЛОЖЬЛОЖЬЛОЖЬЛОЖЬЛОЖЬЛОЖЬЛОЖЬЛОЖЬЛОЖЬЛОЖЬЛОЖЬЛОЖЬ	ЛОЖЬЛОЖЬЛОЖЬЛОЖЬЛОЖЬЛОЖЬЛОЖЬЛОЖЬЛОЖЬЛОЖЬЛОЖЬЛОЖЬЛОЖЬЛОЖЬЛОЖЬЛОЖЬpotassian-ЛОЖЬЛОЖЬЛОЖЬ	ЛОЖЬЛОЖЬЛОЖЬЛОЖЬЛОЖЬЛОЖЬЛОЖЬЛОЖЬЛОЖЬЛОЖЬЛОЖЬЛОЖЬЛОЖЬЛОЖЬЛОЖЬЛОЖЬpotassian-ЛОЖЬЛОЖЬЛОЖЬ	ЛОЖЬЛОЖЬЛОЖЬЛОЖЬЛОЖЬЛОЖЬЛОЖЬЛОЖЬЛОЖЬЛОЖЬЛОЖЬЛОЖЬЛОЖЬЛОЖЬЛОЖЬЛОЖЬpotassian-ЛОЖЬЛОЖЬЛОЖЬ	ЛОЖЬЛОЖЬЛОЖЬЛОЖЬЛОЖЬЛОЖЬЛОЖЬЛОЖЬЛОЖЬЛОЖЬЛОЖЬЛОЖЬЛОЖЬЛОЖЬЛОЖЬЛОЖЬpotassian-ЛОЖЬЛОЖЬЛОЖЬ	ЛОЖЬЛОЖЬЛОЖЬЛОЖЬЛОЖЬЛОЖЬЛОЖЬЛОЖЬЛОЖЬЛОЖЬЛОЖЬЛОЖЬЛОЖЬЛОЖЬЛОЖЬЛОЖЬЛОЖЬЛОЖЬЛОЖЬЛОЖЬ	ЛОЖЬЛОЖЬЛОЖЬЛОЖЬЛОЖЬЛОЖЬЛОЖЬЛОЖЬЛОЖЬЛОЖЬЛОЖЬЛОЖЬЛОЖЬЛОЖЬЛОЖЬЛОЖЬЛОЖЬЛОЖЬЛОЖЬЛОЖЬ	ЛОЖЬЛОЖЬЛОЖЬЛОЖЬЛОЖЬЛОЖЬЛОЖЬЛОЖЬЛОЖЬЛОЖЬЛОЖЬЛОЖЬЛОЖЬЛОЖЬЛОЖЬЛОЖЬЛОЖЬЛОЖЬЛОЖЬЛОЖЬ	ЛОЖЬЛОЖЬЛОЖЬЛОЖЬЛОЖЬЛОЖЬЛОЖЬЛОЖЬЛОЖЬЛОЖЬЛОЖЬЛОЖЬЛОЖЬЛОЖЬЛОЖЬЛОЖЬЛОЖЬЛОЖЬЛОЖЬЛОЖЬ	ЛОЖЬЛОЖЬЛОЖЬЛОЖЬЛОЖЬЛОЖЬЛОЖЬЛОЖЬЛОЖЬЛОЖЬЛОЖЬЛОЖЬЛОЖЬЛОЖЬЛОЖЬЛОЖЬЛОЖЬЛОЖЬЛОЖЬЛОЖЬ	ЛОЖЬЛОЖЬЛОЖЬЛОЖЬЛОЖЬЛОЖЬЛОЖЬЛОЖЬЛОЖЬЛОЖЬЛОЖЬЛОЖЬЛОЖЬЛОЖЬЛОЖЬЛОЖЬpotassian-ЛОЖЬЛОЖЬЛОЖЬ	ЛОЖЬЛОЖЬЛОЖЬЛОЖЬЛОЖЬЛОЖЬЛОЖЬЛОЖЬЛОЖЬЛОЖЬЛОЖЬЛОЖЬЛОЖЬЛОЖЬЛОЖЬЛОЖЬpotassian-ЛОЖЬЛОЖЬЛОЖЬ	ЛОЖЬЛОЖЬЛОЖЬЛОЖЬЛОЖЬЛОЖЬЛОЖЬЛОЖЬЛОЖЬЛОЖЬЛОЖЬЛОЖЬЛОЖЬЛОЖЬЛОЖЬЛОЖЬpotassian-ЛОЖЬЛОЖЬЛОЖЬ	ЛОЖЬЛОЖЬЛОЖЬЛОЖЬЛОЖЬЛОЖЬЛОЖЬЛОЖЬЛОЖЬЛОЖЬЛОЖЬЛОЖЬЛОЖЬЛОЖЬЛОЖЬpotassium-ЛОЖЬЛОЖЬЛОЖЬЛОЖЬ	ЛОЖЬЛОЖЬЛОЖЬЛОЖЬЛОЖЬЛОЖЬЛОЖЬЛОЖЬЛОЖЬЛОЖЬЛОЖЬЛОЖЬЛОЖЬЛОЖЬЛОЖЬЛОЖЬЛОЖЬЛОЖЬЛОЖЬЛОЖЬ	ЛОЖЬЛОЖЬЛОЖЬЛОЖЬЛОЖЬЛОЖЬЛОЖЬЛОЖЬЛОЖЬЛОЖЬЛОЖЬЛОЖЬЛОЖЬЛОЖЬЛОЖЬЛОЖЬpotassian-ЛОЖЬЛОЖЬЛОЖЬ	ЛОЖЬЛОЖЬЛОЖЬЛОЖЬЛОЖЬЛОЖЬЛОЖЬЛОЖЬЛОЖЬЛОЖЬЛОЖЬЛОЖЬЛОЖЬЛОЖЬЛОЖЬЛОЖЬpotassian-ЛОЖЬЛОЖЬЛОЖЬ	ЛОЖЬЛОЖЬЛОЖЬЛОЖЬЛОЖЬЛОЖЬЛОЖЬЛОЖЬЛОЖЬЛОЖЬЛОЖЬЛОЖЬЛОЖЬЛОЖЬЛОЖЬЛОЖЬЛОЖЬЛОЖЬЛОЖЬЛОЖЬ	ЛОЖЬЛОЖЬЛОЖЬЛОЖЬЛОЖЬЛОЖЬЛОЖЬЛОЖЬЛОЖЬЛОЖЬЛОЖЬЛОЖЬЛОЖЬЛОЖЬЛОЖЬpotassium-ЛОЖЬЛОЖЬЛОЖЬЛОЖЬ	ЛОЖЬЛОЖЬЛОЖЬЛОЖЬЛОЖЬЛОЖЬЛОЖЬЛОЖЬЛОЖЬЛОЖЬЛОЖЬЛОЖЬЛОЖЬЛОЖЬЛОЖЬЛОЖЬpotassian-ЛОЖЬЛОЖЬЛОЖЬ	ЛОЖЬЛОЖЬЛОЖЬЛОЖЬЛОЖЬЛОЖЬЛОЖЬЛОЖЬЛОЖЬЛОЖЬЛОЖЬЛОЖЬЛОЖЬЛОЖЬЛОЖЬЛОЖЬpotassian-ЛОЖЬЛОЖЬЛОЖЬ	ЛОЖЬЛОЖЬЛОЖЬЛОЖЬЛОЖЬЛОЖЬЛОЖЬЛОЖЬЛОЖЬЛОЖЬЛОЖЬЛОЖЬЛОЖЬЛОЖЬЛОЖЬЛОЖЬpotassian-ЛОЖЬЛОЖЬЛОЖЬ	ЛОЖЬЛОЖЬЛОЖЬЛОЖЬЛОЖЬЛОЖЬЛОЖЬЛОЖЬЛОЖЬЛОЖЬЛОЖЬЛОЖЬЛОЖЬЛОЖЬЛОЖЬЛОЖЬЛОЖЬЛОЖЬЛОЖЬЛОЖЬ	ЛОЖЬЛОЖЬЛОЖЬЛОЖЬЛОЖЬЛОЖЬЛОЖЬЛОЖЬЛОЖЬЛОЖЬЛОЖЬЛОЖЬЛОЖЬЛОЖЬЛОЖЬЛОЖЬЛОЖЬЛОЖЬЛОЖЬЛОЖЬ	ЛОЖЬЛОЖЬЛОЖЬЛОЖЬЛОЖЬЛОЖЬЛОЖЬЛОЖЬЛОЖЬЛОЖЬЛОЖЬЛОЖЬЛОЖЬЛОЖЬЛОЖЬЛОЖЬЛОЖЬЛОЖЬЛОЖЬЛОЖЬ	ЛОЖЬЛОЖЬЛОЖЬЛОЖЬЛОЖЬЛОЖЬЛОЖЬЛОЖЬЛОЖЬЛОЖЬЛОЖЬЛОЖЬЛОЖЬЛОЖЬЛОЖЬЛОЖЬЛОЖЬЛОЖЬЛОЖЬЛОЖЬ	ЛОЖЬЛОЖЬЛОЖЬЛОЖЬЛОЖЬЛОЖЬЛОЖЬЛОЖЬЛОЖЬЛОЖЬЛОЖЬЛОЖЬЛОЖЬЛОЖЬЛОЖЬЛОЖЬpotassian-ЛОЖЬЛОЖЬЛОЖЬ	ЛОЖЬЛОЖЬЛОЖЬЛОЖЬЛОЖЬЛОЖЬЛОЖЬЛОЖЬЛОЖЬЛОЖЬЛОЖЬЛОЖЬЛОЖЬЛОЖЬЛОЖЬЛОЖЬpotassian-ЛОЖЬЛОЖЬЛОЖЬ	ЛОЖЬЛОЖЬЛОЖЬЛОЖЬЛОЖЬЛОЖЬЛОЖЬЛОЖЬЛОЖЬЛОЖЬЛОЖЬЛОЖЬЛОЖЬЛОЖЬЛОЖЬЛОЖЬpotassian-ЛОЖЬЛОЖЬЛОЖЬ	ЛОЖЬЛОЖЬЛОЖЬЛОЖЬЛОЖЬЛОЖЬЛОЖЬЛОЖЬЛОЖЬЛОЖЬЛОЖЬЛОЖЬЛОЖЬЛОЖЬЛОЖЬЛОЖЬpotassian-ЛОЖЬЛОЖЬЛОЖЬ	ЛОЖЬЛОЖЬЛОЖЬЛОЖЬЛОЖЬЛОЖЬЛОЖЬЛОЖЬЛОЖЬЛОЖЬЛОЖЬЛОЖЬЛОЖЬЛОЖЬЛОЖЬЛОЖЬЛОЖЬЛОЖЬЛОЖЬЛОЖЬ	ЛОЖЬЛОЖЬЛОЖЬЛОЖЬЛОЖЬЛОЖЬЛОЖЬЛОЖЬЛОЖЬЛОЖЬЛОЖЬЛОЖЬЛОЖЬЛОЖЬЛОЖЬpotassium-ЛОЖЬЛОЖЬЛОЖЬЛОЖЬ	ЛОЖЬЛОЖЬЛОЖЬЛОЖЬЛОЖЬЛОЖЬЛОЖЬЛОЖЬЛОЖЬЛОЖЬЛОЖЬЛОЖЬЛОЖЬЛОЖЬЛОЖЬЛОЖЬpotassian-ЛОЖЬЛОЖЬЛОЖЬ	ЛОЖЬЛОЖЬЛОЖЬЛОЖЬЛОЖЬЛОЖЬЛОЖЬЛОЖЬЛОЖЬЛОЖЬЛОЖЬЛОЖЬЛОЖЬЛОЖЬЛОЖЬЛОЖЬЛОЖЬЛОЖЬЛОЖЬЛОЖЬ	ЛОЖЬЛОЖЬЛОЖЬЛОЖЬЛОЖЬЛОЖЬЛОЖЬЛОЖЬЛОЖЬЛОЖЬЛОЖЬЛОЖЬЛОЖЬЛОЖЬЛОЖЬЛОЖЬЛОЖЬЛОЖЬЛОЖЬЛОЖЬ	ЛОЖЬЛОЖЬЛОЖЬЛОЖЬЛОЖЬЛОЖЬЛОЖЬЛОЖЬЛОЖЬЛОЖЬЛОЖЬЛОЖЬЛОЖЬЛОЖЬЛОЖЬЛОЖЬЛОЖЬЛОЖЬЛОЖЬЛОЖЬ	ЛОЖЬЛОЖЬЛОЖЬЛОЖЬЛОЖЬЛОЖЬЛОЖЬЛОЖЬЛОЖЬЛОЖЬЛОЖЬЛОЖЬЛОЖЬЛОЖЬЛОЖЬpotassium-ЛОЖЬЛОЖЬЛОЖЬЛОЖЬ	ЛОЖЬЛОЖЬЛОЖЬЛОЖЬЛОЖЬЛОЖЬЛОЖЬЛОЖЬЛОЖЬЛОЖЬЛОЖЬЛОЖЬЛОЖЬЛОЖЬЛОЖЬЛОЖЬЛОЖЬЛОЖЬЛОЖЬЛОЖЬ	ЛОЖЬЛОЖЬЛОЖЬЛОЖЬЛОЖЬЛОЖЬЛОЖЬЛОЖЬЛОЖЬЛОЖЬЛОЖЬЛОЖЬЛОЖЬЛОЖЬЛОЖЬЛОЖЬpotassian-ЛОЖЬЛОЖЬЛОЖЬ	ЛОЖЬЛОЖЬЛОЖЬЛОЖЬЛОЖЬЛОЖЬЛОЖЬЛОЖЬЛОЖЬЛОЖЬЛОЖЬЛОЖЬЛОЖЬЛОЖЬЛОЖЬЛОЖЬЛОЖЬЛОЖЬЛОЖЬЛОЖЬ	ЛОЖЬЛОЖЬЛОЖЬЛОЖЬЛОЖЬЛОЖЬЛОЖЬЛОЖЬЛОЖЬЛОЖЬЛОЖЬЛОЖЬЛОЖЬЛОЖЬЛОЖЬЛОЖЬpotassian-ЛОЖЬЛОЖЬЛОЖЬ
Final adjectival modifier								potassian-		potassian-	potassian-	potassian-	potassian-						potassian-	potassian-	potassian-	potassium-		potassian-	potassian-		potassium-	potassian-	potassian-	potassian-					potassian-	potassian-	potassian-	potassian-		potassium-	potassian-				potassium-		potassian-		potassian-
	ЛОЖЬЛОЖЬЛОЖЬЛОЖЬЛОЖЬЛОЖЬЛОЖЬЛОЖЬЛОЖЬ	ЛОЖЬЛОЖЬЛОЖЬЛОЖЬЛОЖЬЛОЖЬЛОЖЬЛОЖЬЛОЖЬ	ЛОЖЬЛОЖЬЛОЖЬЛОЖЬЛОЖЬЛОЖЬЛОЖЬЛОЖЬЛОЖЬ	ЛОЖЬЛОЖЬЛОЖЬЛОЖЬЛОЖЬЛОЖЬЛОЖЬЛОЖЬЛОЖЬ	ЛОЖЬЛОЖЬЛОЖЬЛОЖЬЛОЖЬЛОЖЬЛОЖЬЛОЖЬЛОЖЬ	ЛОЖЬЛОЖЬЛОЖЬЛОЖЬЛОЖЬЛОЖЬЛОЖЬЛОЖЬЛОЖЬ	ЛОЖЬЛОЖЬЛОЖЬЛОЖЬЛОЖЬЛОЖЬЛОЖЬЛОЖЬЛОЖЬ	ЛОЖЬЛОЖЬЛОЖЬЛОЖЬЛОЖЬЛОЖЬЛОЖЬЛОЖЬЛОЖЬ	ЛОЖЬЛОЖЬЛОЖЬЛОЖЬЛОЖЬЛОЖЬЛОЖЬЛОЖЬЛОЖЬ	ЛОЖЬЛОЖЬЛОЖЬЛОЖЬЛОЖЬЛОЖЬЛОЖЬЛОЖЬЛОЖЬ	ЛОЖЬЛОЖЬЛОЖЬЛОЖЬЛОЖЬЛОЖЬЛОЖЬЛОЖЬЛОЖЬ	ЛОЖЬЛОЖЬЛОЖЬЛОЖЬЛОЖЬЛОЖЬЛОЖЬЛОЖЬЛОЖЬ	ЛОЖЬЛОЖЬЛОЖЬЛОЖЬЛОЖЬЛОЖЬЛОЖЬЛОЖЬЛОЖЬ	ЛОЖЬЛОЖЬЛОЖЬЛОЖЬЛОЖЬЛОЖЬЛОЖЬЛОЖЬЛОЖЬ	ЛОЖЬЛОЖЬЛОЖЬЛОЖЬЛОЖЬЛОЖЬЛОЖЬЛОЖЬЛОЖЬ	ЛОЖЬЛОЖЬЛОЖЬsubcalcic sodian ЛОЖЬЛОЖЬЛОЖЬЛОЖЬ	ЛОЖЬЛОЖЬЛОЖЬsubcalcic sodian ЛОЖЬЛОЖЬЛОЖЬЛОЖЬ	ЛОЖЬЛОЖЬЛОЖЬЛОЖЬЛОЖЬЛОЖЬЛОЖЬЛОЖЬЛОЖЬ	ЛОЖЬЛОЖЬЛОЖЬЛОЖЬЛОЖЬЛОЖЬЛОЖЬЛОЖЬЛОЖЬ	ЛОЖЬЛОЖЬЛОЖЬЛОЖЬЛОЖЬЛОЖЬЛОЖЬЛОЖЬЛОЖЬ	ЛОЖЬЛОЖЬЛОЖЬЛОЖЬЛОЖЬЛОЖЬЛОЖЬЛОЖЬЛОЖЬ	ЛОЖЬЛОЖЬЛОЖЬЛОЖЬЛОЖЬЛОЖЬЛОЖЬЛОЖЬЛОЖЬ	ЛОЖЬЛОЖЬЛОЖЬЛОЖЬЛОЖЬЛОЖЬЛОЖЬЛОЖЬЛОЖЬ	ЛОЖЬЛОЖЬЛОЖЬЛОЖЬЛОЖЬЛОЖЬЛОЖЬЛОЖЬЛОЖЬ	ЛОЖЬЛОЖЬЛОЖЬЛОЖЬЛОЖЬЛОЖЬЛОЖЬЛОЖЬЛОЖЬ	ЛОЖЬЛОЖЬЛОЖЬЛОЖЬЛОЖЬЛОЖЬЛОЖЬЛОЖЬЛОЖЬ	ЛОЖЬЛОЖЬЛОЖЬЛОЖЬЛОЖЬЛОЖЬЛОЖЬЛОЖЬЛОЖЬ	ЛОЖЬЛОЖЬЛОЖЬЛОЖЬЛОЖЬЛОЖЬЛОЖЬЛОЖЬЛОЖЬ	ЛОЖЬЛОЖЬЛОЖЬЛОЖЬЛОЖЬЛОЖЬЛОЖЬЛОЖЬЛОЖЬ	ЛОЖЬЛОЖЬЛОЖЬЛОЖЬЛОЖЬЛОЖЬЛОЖЬЛОЖЬЛОЖЬ	ЛОЖЬЛОЖЬЛОЖЬЛОЖЬЛОЖЬЛОЖЬЛОЖЬЛОЖЬЛОЖЬ	ЛОЖЬЛОЖЬЛОЖЬЛОЖЬЛОЖЬЛОЖЬЛОЖЬЛОЖЬЛОЖЬ	ЛОЖЬЛОЖЬЛОЖЬЛОЖЬЛОЖЬЛОЖЬЛОЖЬЛОЖЬЛОЖЬ	ЛОЖЬЛОЖЬЛОЖЬЛОЖЬЛОЖЬЛОЖЬЛОЖЬЛОЖЬЛОЖЬ	ЛОЖЬЛОЖЬЛОЖЬЛОЖЬЛОЖЬЛОЖЬЛОЖЬЛОЖЬЛОЖЬ	ЛОЖЬЛОЖЬЛОЖЬЛОЖЬЛОЖЬЛОЖЬЛОЖЬЛОЖЬЛОЖЬ	ЛОЖЬЛОЖЬЛОЖЬЛОЖЬЛОЖЬЛОЖЬЛОЖЬЛОЖЬЛОЖЬ	ЛОЖЬЛОЖЬЛОЖЬЛОЖЬЛОЖЬЛОЖЬЛОЖЬЛОЖЬЛОЖЬ	ЛОЖЬЛОЖЬЛОЖЬЛОЖЬЛОЖЬЛОЖЬЛОЖЬЛОЖЬЛОЖЬ	ЛОЖЬЛОЖЬЛОЖЬЛОЖЬЛОЖЬЛОЖЬЛОЖЬЛОЖЬЛОЖЬ	ЛОЖЬЛОЖЬЛОЖЬЛОЖЬЛОЖЬЛОЖЬЛОЖЬЛОЖЬЛОЖЬ	ЛОЖЬЛОЖЬЛОЖЬЛОЖЬЛОЖЬЛОЖЬЛОЖЬЛОЖЬЛОЖЬ	ЛОЖЬЛОЖЬЛОЖЬЛОЖЬЛОЖЬЛОЖЬЛОЖЬЛОЖЬЛОЖЬ	ЛОЖЬЛОЖЬЛОЖЬЛОЖЬЛОЖЬЛОЖЬЛОЖЬЛОЖЬЛОЖЬ	ЛОЖЬЛОЖЬЛОЖЬЛОЖЬЛОЖЬЛОЖЬЛОЖЬЛОЖЬЛОЖЬ	ЛОЖЬЛОЖЬЛОЖЬЛОЖЬЛОЖЬЛОЖЬЛОЖЬЛОЖЬЛОЖЬ	ЛОЖЬЛОЖЬЛОЖЬЛОЖЬЛОЖЬЛОЖЬЛОЖЬЛОЖЬЛОЖЬ	ЛОЖЬЛОЖЬЛОЖЬЛОЖЬЛОЖЬЛОЖЬЛОЖЬЛОЖЬЛОЖЬ	ЛОЖЬЛОЖЬЛОЖЬЛОЖЬЛОЖЬЛОЖЬЛОЖЬЛОЖЬЛОЖЬ
Final prefix																subcalcic sodian	subcalcic sodian
Fe-Mg-Mn monoclinic prefix			sodian
Get rid of empty cells 1
Get rid of empty cells 2								potassian-		potassian-	potassian-	potassian-	potassian-			subcalcic sodian	subcalcic sodian		potassian-	potassian-	potassian-	potassium-		potassian-	potassian-		potassium-	potassian-	potassian-	potassian-					potassian-	potassian-	potassian-	potassian-		potassium-	potassian-				potassium-		potassian-		potassian-
Get rid of empty monoclinic cells 1
Get rid of empty monoclinic cells 2			sodian					potassian-		potassian-	potassian-	potassian-	potassian-						potassian-	potassian-	potassian-	potassium-		potassian-	potassian-		potassium-	potassian-	potassian-	potassian-					potassian-	potassian-	potassian-	potassian-		potassium-	potassian-				potassium-		potassian-		potassian-
Part 17. Non IMA scheme amphs.
Sum of oxides	95.2	96.2	94.98	99.39	97.38	97.64	102.369	98.26	97.72	94.4	97.9933	97.78	97.74	97.73	97.72	101.809	97.75	97.77	97.74	97.74	97.77	98.2144	97.68	98.2926	97.77	97.75	97.77	97.76	97.6783	97.75	97.74	97.74	97.76	97.75	98.7261	96.68	97.77	97.76	97.75	97.75	98.6367	97.75	97.73	97.71	97.78	97.76	97.73	97.7	98.5624
? holmquistite	FALSE	FALSE	FALSE	FALSE	FALSE	FALSE	FALSE	FALSE	FALSE	FALSE	FALSE	FALSE	FALSE	FALSE	FALSE	FALSE	FALSE	FALSE	FALSE	FALSE	FALSE	FALSE	FALSE	FALSE	FALSE	FALSE	FALSE	FALSE	FALSE	FALSE	FALSE	FALSE	FALSE	FALSE	FALSE	FALSE	FALSE	FALSE	FALSE	FALSE	FALSE	FALSE	FALSE	FALSE	FALSE	FALSE	FALSE	FALSE	FALSE
? joesmithite	FALSE	FALSE	FALSE	FALSE	FALSE	FALSE	FALSE	FALSE	FALSE	FALSE	FALSE	FALSE	FALSE	FALSE	FALSE	FALSE	FALSE	FALSE	FALSE	FALSE	FALSE	FALSE	FALSE	FALSE	FALSE	FALSE	FALSE	FALSE	FALSE	FALSE	FALSE	FALSE	FALSE	FALSE	FALSE	FALSE	FALSE	FALSE	FALSE	FALSE	FALSE	FALSE	FALSE	FALSE	FALSE	FALSE	FALSE	FALSE	FALSE
? leakeite	FALSE	FALSE	FALSE	FALSE	FALSE	FALSE	FALSE	FALSE	FALSE	FALSE	FALSE	FALSE	FALSE	FALSE	FALSE	FALSE	FALSE	FALSE	FALSE	FALSE	FALSE	FALSE	FALSE	FALSE	FALSE	FALSE	FALSE	FALSE	FALSE	FALSE	FALSE	FALSE	FALSE	FALSE	FALSE	FALSE	FALSE	FALSE	FALSE	FALSE	FALSE	FALSE	FALSE	FALSE	FALSE	FALSE	FALSE	FALSE	FALSE
? kornite	FALSE	FALSE	FALSE	FALSE	FALSE	FALSE	FALSE	FALSE	FALSE	FALSE	FALSE	FALSE	FALSE	FALSE	FALSE	FALSE	FALSE	FALSE	FALSE	FALSE	FALSE	FALSE	FALSE	FALSE	FALSE	FALSE	FALSE	FALSE	FALSE	FALSE	FALSE	FALSE	FALSE	FALSE	FALSE	FALSE	FALSE	FALSE	FALSE	FALSE	FALSE	FALSE	FALSE	FALSE	FALSE	FALSE	FALSE	FALSE	FALSE
	ЛОЖЬЛОЖЬЛОЖЬЛОЖЬ	ЛОЖЬЛОЖЬЛОЖЬЛОЖЬ	ЛОЖЬЛОЖЬЛОЖЬЛОЖЬ	ЛОЖЬЛОЖЬЛОЖЬЛОЖЬ	ЛОЖЬЛОЖЬЛОЖЬЛОЖЬ	ЛОЖЬЛОЖЬЛОЖЬЛОЖЬ	ЛОЖЬЛОЖЬЛОЖЬЛОЖЬ	ЛОЖЬЛОЖЬЛОЖЬЛОЖЬ	ЛОЖЬЛОЖЬЛОЖЬЛОЖЬ	ЛОЖЬЛОЖЬЛОЖЬЛОЖЬ	ЛОЖЬЛОЖЬЛОЖЬЛОЖЬ	ЛОЖЬЛОЖЬЛОЖЬЛОЖЬ	ЛОЖЬЛОЖЬЛОЖЬЛОЖЬ	ЛОЖЬЛОЖЬЛОЖЬЛОЖЬ	ЛОЖЬЛОЖЬЛОЖЬЛОЖЬ	ЛОЖЬЛОЖЬЛОЖЬЛОЖЬ	ЛОЖЬЛОЖЬЛОЖЬЛОЖЬ	ЛОЖЬЛОЖЬЛОЖЬЛОЖЬ	ЛОЖЬЛОЖЬЛОЖЬЛОЖЬ	ЛОЖЬЛОЖЬЛОЖЬЛОЖЬ	ЛОЖЬЛОЖЬЛОЖЬЛОЖЬ	ЛОЖЬЛОЖЬЛОЖЬЛОЖЬ	ЛОЖЬЛОЖЬЛОЖЬЛОЖЬ	ЛОЖЬЛОЖЬЛОЖЬЛОЖЬ	ЛОЖЬЛОЖЬЛОЖЬЛОЖЬ	ЛОЖЬЛОЖЬЛОЖЬЛОЖЬ	ЛОЖЬЛОЖЬЛОЖЬЛОЖЬ	ЛОЖЬЛОЖЬЛОЖЬЛОЖЬ	ЛОЖЬЛОЖЬЛОЖЬЛОЖЬ	ЛОЖЬЛОЖЬЛОЖЬЛОЖЬ	ЛОЖЬЛОЖЬЛОЖЬЛОЖЬ	ЛОЖЬЛОЖЬЛОЖЬЛОЖЬ	ЛОЖЬЛОЖЬЛОЖЬЛОЖЬ	ЛОЖЬЛОЖЬЛОЖЬЛОЖЬ	ЛОЖЬЛОЖЬЛОЖЬЛОЖЬ	ЛОЖЬЛОЖЬЛОЖЬЛОЖЬ	ЛОЖЬЛОЖЬЛОЖЬЛОЖЬ	ЛОЖЬЛОЖЬЛОЖЬЛОЖЬ	ЛОЖЬЛОЖЬЛОЖЬЛОЖЬ	ЛОЖЬЛОЖЬЛОЖЬЛОЖЬ	ЛОЖЬЛОЖЬЛОЖЬЛОЖЬ	ЛОЖЬЛОЖЬЛОЖЬЛОЖЬ	ЛОЖЬЛОЖЬЛОЖЬЛОЖЬ	ЛОЖЬЛОЖЬЛОЖЬЛОЖЬ	ЛОЖЬЛОЖЬЛОЖЬЛОЖЬ	ЛОЖЬЛОЖЬЛОЖЬЛОЖЬ	ЛОЖЬЛОЖЬЛОЖЬЛОЖЬ	ЛОЖЬЛОЖЬЛОЖЬЛОЖЬ	ЛОЖЬЛОЖЬЛОЖЬЛОЖЬ
Alternative name
Hidden calculations	•	•	•	•	•	•	•	•	•	•	•	•	•	•	•	•	•	•	•	•	•	•	•	•	•	•	•	•	•	•	•	•	•	•	•	•	•	•	•	•	•	•	•	•	•	•	•	•	•
[truncated: 206 more columns]
