# Supplementary material for: Unique Amphibole Bearing Mantle Column Beneath the Leningrad Kimberlite Pipe, West Ukukit Field, NE Yakutia
Source: Preprints.org preprint supplement (doi:10.20944/preprints202112.0444.v1), 2021-12-28
Supplement: Supplementary file 2 [file AmfLeningr2.xls]

## Sheet: amfamg
PROBE-AMPH an amphibole structural formula calculator and classifier (with barometers)
For microprobe analyses: i.e. H2O, Fe2O3 and Li2O not analysed
Based on 23 oxygens with Fe2+/Fe3+ estimation assuming Џ13 cations - except for Fe-Mg-Mn amphiboles where Џ15 is applied.
The method cannot distinguish between orthorhombic and monoclinic Fe-Mg-Mn amphiboles.
See Leake, (1978) Miner. Mag.; Rock and Leake, (1984) Miner. Mag. and Mogessie et al., (1990) Computers and Geosciences for classification info.
See Hammarstrom and Zen (1986), Hollister et al. (1987), Johnson and Rutherford (1989) and Schmidt (1992) for geobarometry info.
Input data here	Magnesio Cummingtonite (m) Magnesio Anthophyllite (orh)	Cummingtonite (m) Anthophyllite (orh)	Sodian-Magnesio Cummingtonite (m) Magnesio Gedrite (orh)	Dannemorite	Tirodite	Lgam253	Lgam326	Lgam211	Lgam060	Lgam238	Lgam161	Lgam309	Lgam327	Lgam280	Lgam298	Lgam164	Lgam303	Lgam281	OL5-114	Lgam140	Lgam212	Lgam220	Lgam364	Lgam158	OL5-151	Lgam119	OL5-58	Lgam282	Lgam199	OL5-92	Lgam340	OL5-67	Lgam256	Lgam285	OL5-40	Lgam336	Lgam341	OL5-98	Lgam264	Lgam337	Lgam342	Lgam358	Lgam349	Lgam333	OL5-69	Lgam213	Lgam322	Lgam359	Lgam257
Sample number	M1	M2	M3	M9	M10	A	A	A	A	A	A	A	A	A	A	A	A	A	A	A	A	A	A	A	A	A	A	A	A	A	A	A	A	A	A	A	A	A	A	A	A	A	A	A	A	A	A	A	A
SiO2	60	52.5	49.01	50.6	55.27	53.71	53.68	53.66	53.65	53.65	53.63	53.62	53.57	53.56	53.5	53.48	53.46	53.43	53.385	53.27	53.21	53.2	53.17	53.16	53.1198	53.11	53.0964	52.99	52.97	52.8582	52.76	52.7144	52.69	52.69	52.5954	52.56	52.55	52.5396	52.52	52.46	52.35	52.31	52.26	52.25	52.1728	52.15	52.07	52.07	52.04
TiO2	0	0	0.2	0	0	0.12	0.09	0.23	0.2	0.1	0.3	0.14	0.19	0.17	0.14	0.28	0.04	0.19	0.2646	0.37	0.32	0.3	0.02	0.35	0.1719	0.5	0.2346	0.33	0.32	0.0473	0.09	0.0911	0.25	0.13	0.2387	0.07	0.03	0.1153	0.33	0.12	0.14	0.06	0.1	0.1	0.2322	0.34	0.16	0.05	0.05
Al2O3	0.4	4.4	14.91	0.04	0.34	1.85	2.94	2.66	1.35	3.49	2.63	3.45	3.36	3.27	3.41	2.44	3.13	3.32	2.4968	2.41	2.91	2.89	3.86	1.88	3.4394	3.06	3.5646	3.25	3.15	3.1482	4.73	3.4506	2.45	3.91	2.3141	4.45	4.63	3.5622	3.79	4.52	4.94	4.67	4.79	4.49	3.6915	3.6	4.83	4.74	4.55
FeO	0.4	20.4	0.55	36.1	4.52	1.93	2.85	5.11	1.89	2.67	5.03	2.59	2.86	2.86	2.6	2.33	1.65	2.89	2.6503	1.98	5.88	5.78	2.92	2.15	2.6495	3.44	2.6097	1.63	6.65	2.5957	2.85	2.4214	1.64	2.78	9.0208	2.68	2.92	2.5743	2.54	2.84	2.74	2.83	2.89	2.93	3.3976	6.82	3.1	2.5	2.88
MnO	0.6	0.3	0	5.8	16.62	0.04	0.06	0.09	0	0.07	0.07	0.06	0.07	0.05	0.06	0.01	0.01	0.05	0.0508	0.03	0.11	0.12	0.06	0	0.062	0.06	0.0541	0	0.11	0.0515	0.07	0.0533	0.03	0.05	0.0991	0.06	0.06	0.0562	0.04	0.06	0.06	0.05	0.06	0.06	0.0782	0.12	0.05	0.06	0.06
MgO	33.4	18	28.62	6.4	19.18	24.56	23.09	21.78	20.62	22.67	21.86	22.89	22.66	22.63	22.92	21.5	22.78	22.67	20.7782	21.69	21.41	21.41	22.78	23.74	23.159	22.28	22.4689	21.28	20.54	22.3506	21.94	22.3784	22.18	22.71	18.9137	22.52	22.04	22.6313	22.71	22.32	21.88	22.12	22.35	22.26	22.1609	20.53	22.05	22.51	22.39
CaO	0.2	0.5	0.23	0.4	1.19	9.13	8.43	9	8.24	9.54	8.49	10.14	8.52	8.42	10.12	8.64	9.25	8.47	8.7512	8.81	8.52	8.56	8.95	8.84	9.5977	9.93	9.7315	9.65	8.45	9.2327	10.03	10.0563	9.67	9.52	11.6114	10.04	9.31	9.7503	9.86	9.95	9.96	10	9.94	10.17	8.6336	8.57	9.54	10.92	9.75
Na2O	0.2	0.1	1.46	0.05	0.26	3.89	5.04	4.26	4.3	4.05	4.69	3.6	4.92	5	3.67	4.53	4.16	4.99	4.5103	4.32	4.55	4.64	4.55	4.46	4.5625	3.72	4.3397	4.02	4.76	4.5719	3.78	3.9366	4.11	4.33	0.3681	3.91	4.37	4.2804	4.13	3.86	4	4.07	3.89	3.82	5.1896	4.79	4.21	3.43	4.05
K2O	0	0	0	0	0	0.5	0.3	0.6	1.56	0.55	0.71	0.35	0.3	0.42	0.38	0.7	0.37	0.42	0.572	0.8	0.6	0.59	0.21	0.72	0.1983	0.88	0.4516	0.42	0.61	0.4024	0.26	0.2728	0.49	0.41	0.1001	0.27	0.26	0.2111	0.47	0.27	0.26	0.23	0.25	0.28	0.36	0.6	0.32	0.23	0.49
BaO
SrO
PbO
ZnO
F
Cl
Cr2O3						0.58	1.23	0.33	0.19	0.97	0.31	0.89	1.28	1.34	0.93	0.75	0.67	1.28	0.9729	0.7	0.24	0.25	1.22	0.57	0.9598	0.75	1.066	0.87	0.18	1.1316	1.22	0.9871	0.62	1.23	0.6513	1.17	1.55	1.0364	1.33	1.34	1.4	1.41	1.21	1.34	1.0057	0.2	1.44	1.21	1.47
NiO
Reformatted oxide %	Magnesio Cummingtonite (m) Magnesio Anthophyllite (orh)	Cummingtonite (m) Anthophyllite (orh)	Sodian-Magnesio Cummingtonite (m) Magnesio Gedrite (orh)	Dannemorite	Tirodite	Lgam253	Lgam326	Lgam211	Lgam060	Lgam238	Lgam161	Lgam309	Lgam327	Lgam280	Lgam298	Lgam164	Lgam303	Lgam281	OL5-114	Lgam140	Lgam212	Lgam220	Lgam364	Lgam158	OL5-151	Lgam119	OL5-58	Lgam282	Lgam199	OL5-92	Lgam340	OL5-67	Lgam256	Lgam285	OL5-40	Lgam336	Lgam341	OL5-98	Lgam264	Lgam337	Lgam342	Lgam358	Lgam349	Lgam333	OL5-69	Lgam213	Lgam322	Lgam359	Lgam257
	M1	M2	M3	M9	M10	A	A	A	A	A	A	A	A	A	A	A	A	A	A	A	A	A	A	A	A	A	A	A	A	A	A	A	A	A	A	A	A	A	A	A	A	A	A	A	A	A	A	A	A
SiO2	60	52.5	49.01	50.6	55.27	53.71	53.68	53.66	53.65	53.65	53.63	53.62	53.57	53.56	53.5	53.48	53.46	53.43	53.385	53.27	53.21	53.2	53.17	53.16	53.1198	53.11	53.0964	52.99	52.97	52.8582	52.76	52.7144	52.69	52.69	52.5954	52.56	52.55	52.5396	52.52	52.46	52.35	52.31	52.26	52.25	52.1728	52.15	52.07	52.07	52.04
TiO2	0	0	0.2	0	0	0.12	0.09	0.23	0.2	0.1	0.3	0.14	0.19	0.17	0.14	0.28	0.04	0.19	0.2646	0.37	0.32	0.3	0.02	0.35	0.1719	0.5	0.2346	0.33	0.32	0.0473	0.09	0.0911	0.25	0.13	0.2387	0.07	0.03	0.1153	0.33	0.12	0.14	0.06	0.1	0.1	0.2322	0.34	0.16	0.05	0.05
Al2O3	0.4	4.4	14.91	0.04	0.34	1.85	2.94	2.66	1.35	3.49	2.63	3.45	3.36	3.27	3.41	2.44	3.13	3.32	2.4968	2.41	2.91	2.89	3.86	1.88	3.4394	3.06	3.5646	3.25	3.15	3.1482	4.73	3.4506	2.45	3.91	2.3141	4.45	4.63	3.5622	3.79	4.52	4.94	4.67	4.79	4.49	3.6915	3.6	4.83	4.74	4.55
Cr2O3	0	0	0	0	0	0.58	1.23	0.33	0.19	0.97	0.31	0.89	1.28	1.34	0.93	0.75	0.67	1.28	0.9729	0.7	0.24	0.25	1.22	0.57	0.9598	0.75	1.066	0.87	0.18	1.1316	1.22	0.9871	0.62	1.23	0.6513	1.17	1.55	1.0364	1.33	1.34	1.4	1.41	1.21	1.34	1.0057	0.2	1.44	1.21	1.47
Fe2O3	0	0	0	1.00516	0	2.14481	3.16721	5.67874	0	2.96717	5.58984	2.87827	3.17832	3.17832	2.88938	1.61829	1.83364	3.21166	0.227213	1.55475	6.53444	6.42331	3.245	2.38929	2.94439	3.82287	2.90016	0	6.92317	2.8846	3.16721	2.6909	1.48413	3.08941	9.00827	2.97828	3.245	2.86082	2.8227	3.15609	3.04496	3.14498	3.21166	3.25611	3.77575	7.57907	3.44503	2.77825	3.20054
FeO	0.4	20.4	0.55	35.1955	4.52	0	0	0	1.89	0	0	0	0	0	0	0.873784	0	0	2.44584	0.58096	0	0	0	0	0	0	0	1.63	0.420207	0	0	0	0.304508	0	0.914733	0	0	0	0	0	0	0	0	0	0	0	0	0	0
MnO	0.6	0.3	0	5.8	16.62	0.04	0.06	0.09	0	0.07	0.07	0.06	0.07	0.05	0.06	0.01	0.01	0.05	0.0508	0.03	0.11	0.12	0.06	0	0.062	0.06	0.0541	0	0.11	0.0515	0.07	0.0533	0.03	0.05	0.0991	0.06	0.06	0.0562	0.04	0.06	0.06	0.05	0.06	0.06	0.0782	0.12	0.05	0.06	0.06
MgO	33.4	18	28.62	6.4	19.18	24.56	23.09	21.78	20.62	22.67	21.86	22.89	22.66	22.63	22.92	21.5	22.78	22.67	20.7782	21.69	21.41	21.41	22.78	23.74	23.159	22.28	22.4689	21.28	20.54	22.3506	21.94	22.3784	22.18	22.71	18.9137	22.52	22.04	22.6313	22.71	22.32	21.88	22.12	22.35	22.26	22.1609	20.53	22.05	22.51	22.39
NiO	0	0	0	0	0	0	0	0	0	0	0	0	0	0	0	0	0	0	0	0	0	0	0	0	0	0	0	0	0	0	0	0	0	0	0	0	0	0	0	0	0	0	0	0	0	0	0	0	0
ZnO	0	0	0	0	0	0	0	0	0	0	0	0	0	0	0	0	0	0	0	0	0	0	0	0	0	0	0	0	0	0	0	0	0	0	0	0	0	0	0	0	0	0	0	0	0	0	0	0	0
Li2O* (not implemented)
CaO	0.2	0.5	0.23	0.4	1.19	9.13	8.43	9	8.24	9.54	8.49	10.14	8.52	8.42	10.12	8.64	9.25	8.47	8.7512	8.81	8.52	8.56	8.95	8.84	9.5977	9.93	9.7315	9.65	8.45	9.2327	10.03	10.0563	9.67	9.52	11.6114	10.04	9.31	9.7503	9.86	9.95	9.96	10	9.94	10.17	8.6336	8.57	9.54	10.92	9.75
Na2O	0.2	0.1	1.46	0.05	0.26	3.89	5.04	4.26	4.3	4.05	4.69	3.6	4.92	5	3.67	4.53	4.16	4.99	4.5103	4.32	4.55	4.64	4.55	4.46	4.5625	3.72	4.3397	4.02	4.76	4.5719	3.78	3.9366	4.11	4.33	0.3681	3.91	4.37	4.2804	4.13	3.86	4	4.07	3.89	3.82	5.1896	4.79	4.21	3.43	4.05
K2O	0	0	0	0	0	0.5	0.3	0.6	1.56	0.55	0.71	0.35	0.3	0.42	0.38	0.7	0.37	0.42	0.572	0.8	0.6	0.59	0.21	0.72	0.1983	0.88	0.4516	0.42	0.61	0.4024	0.26	0.2728	0.49	0.41	0.1001	0.27	0.26	0.2111	0.47	0.27	0.26	0.23	0.25	0.28	0.36	0.6	0.32	0.23	0.49
BaO	0	0	0	0	0	0	0	0	0	0	0	0	0	0	0	0	0	0	0	0	0	0	0	0	0	0	0	0	0	0	0	0	0	0	0	0	0	0	0	0	0	0	0	0	0	0	0	0	0
SrO	0	0	0	0	0	0	0	0	0	0	0	0	0	0	0	0	0	0	0	0	0	0	0	0	0	0	0	0	0	0	0	0	0	0	0	0	0	0	0	0	0	0	0	0	0	0	0	0	0
PbO	0	0	0	0	0	0	0	0	0	0	0	0	0	0	0	0	0	0	0	0	0	0	0	0	0	0	0	0	0	0	0	0	0	0	0	0	0	0	0	0	0	0	0	0	0	0	0	0	0
F	0	0	0	0	0	0	0	0	0	0	0	0	0	0	0	0	0	0	0	0	0	0	0	0	0	0	0	0	0	0	0	0	0	0	0	0	0	0	0	0	0	0	0	0	0	0	0	0	0
Cl	0	0	0	0	0	0	0	0	0	0	0	0	0	0	0	0	0	0	0	0	0	0	0	0	0	0	0	0	0	0	0	0	0	0	0	0	0	0	0	0	0	0	0	0	0	0	0	0	0
H2O*	2.23906	2.05406	2.2093	1.9134	2.07438	2.14454	2.16813	2.16241	2.04058	2.17027	2.16125	2.172	2.16933	2.16734	2.17017	2.10279	2.13184	2.16641	2.08809	2.09795	2.1594	2.15853	2.16995	2.12744	2.16997	2.15965	2.16213	2.09689	2.1529	2.13666	2.16909	2.13862	2.09241	2.16398	2.11832	2.16651	2.16561	2.14487	2.16094	2.16596	2.16573	2.16427	2.16604	2.16236	2.1418	2.14955	2.16327	2.16339	2.15979
	97.4391	98.2541	97.1893	101.404	99.4544	98.6693	100.195	100.451	94.0406	100.227	100.441	100.19	100.218	100.206	100.19	96.9249	97.8355	100.198	96.543	96.6337	100.564	100.542	100.235	98.2367	100.385	100.273	100.07	96.5369	100.586	98.8157	100.216	98.7701	96.371	100.233	98.9332	100.195	100.211	99.1885	100.164	100.222	100.201	100.229	100.228	100.188	99.4421	100.629	100.278	100.162	100.21
O=F,Cl	0	0	0	0	0	0	0	0	0	0	0	0	0	0	0	0	0	0	0	0	0	0	0	0	0	0	0	0	0	0	0	0	0	0	0	0	0	0	0	0	0	0	0	0	0	0	0	0	0
Total	97.4391	98.2541	97.1893	101.404	99.4544	98.6693	100.195	100.451	94.0406	100.227	100.441	100.19	100.218	100.206	100.19	96.9249	97.8355	100.198	96.543	96.6337	100.564	100.542	100.235	98.2367	100.385	100.273	100.07	96.5369	100.586	98.8157	100.216	98.7701	96.371	100.233	98.9332	100.195	100.211	99.1885	100.164	100.222	100.201	100.229	100.228	100.188	99.4421	100.629	100.278	100.162	100.21
No. of oxygens	23	23	23	23	23	23	23	23	23	23	23	23	23	23	23	23	23	23	23	23	23	23	23	23	23	23	23	23	23	23	23	23	23	23	23	23	23	23	23	23	23	23	23	23	23	23	23	23	23
Structural formulae
Si	8.03496	7.66378	6.65161	7.92944	7.98909	7.50964	7.42378	7.44063	7.8834	7.4123	7.44045	7.40225	7.40446	7.40988	7.39192	7.62594	7.51919	7.39507	7.66596	7.61351	7.38853	7.39012	7.34708	7.49245	7.34006	7.37379	7.36344	7.57731	7.37741	7.41777	7.2933	7.39084	7.55056	7.30083	7.44482	7.27433	7.27594	7.34485	7.28753	7.26231	7.24785	7.2472	7.23436	7.24529	7.30402	7.27452	7.21728	7.21688	7.22475
Al iv	0	0.336224	1.34839	0.00738775	0.010907	0.304857	0.479204	0.434711	0.116602	0.568289	0.430039	0.561328	0.547358	0.533186	0.555288	0.374058	0.48081	0.541572	0.33404	0.38649	0.476231	0.473149	0.628631	0.312289	0.560126	0.500721	0.582622	0.422689	0.517065	0.520695	0.706695	0.57019	0.413787	0.63853	0.386055	0.72567	0.724061	0.586914	0.619805	0.737472	0.752147	0.752798	0.765639	0.733798	0.609089	0.591852	0.782723	0.774284	0.744488
Al vi	0.0631324	0.420777	1.03656	0	0.0470155	0	0	0	0.117195	0	0	0	0	0	0	0.0360065	0.0380455	0	0.088523	0.0194666	0	0	0	0	0	0	0	0.125039	0	0	0.063926	0	0	0	0	0.000198012	0.0314788	0	0	0	0.0539363	0.00974233	0.0158565	0	0	0	0.00630681	0	0
Ti	0	0	0.0204174	0	0	0.0126205	0.00936235	0.0239892	0.0221056	0.0103923	0.0313071	0.0145377	0.019754	0.0176909	0.0145499	0.0300324	0.00423186	0.0197806	0.0285803	0.0397771	0.0334229	0.0313466	0.00207878	0.0371054	0.0178669	0.0522172	0.0244722	0.0354948	0.0335238	0.00499289	0.00935818	0.00960755	0.0269476	0.0135493	0.0254149	0.00728727	0.0031244	0.0121242	0.0344428	0.0124956	0.0145798	0.00625268	0.0104126	0.0104304	0.0244517	0.0356746	0.0166815	0.00521268	0.00522138
Cr	0	0	0	0	0	0.0641162	0.134491	0.0361783	0.0220736	0.105957	0.0340039	0.097141	0.13988	0.146572	0.101592	0.0845549	0.0745062	0.140069	0.110456	0.0790999	0.0263482	0.0274571	0.133286	0.0635169	0.104857	0.0823286	0.116882	0.0983594	0.0198208	0.125554	0.133338	0.109421	0.0702454	0.134749	0.0728892	0.128026	0.169677	0.114551	0.145909	0.146665	0.153248	0.154447	0.132432	0.14691	0.111317	0.0220575	0.157806	0.132594	0.161354
Fe3+	0	0	0	0.118537	0	0.225672	0.32962	0.592565	0	0.308497	0.5836	0.299015	0.330593	0.330897	0.300423	0.173654	0.194081	0.334512	0.0245531	0.16722	0.682807	0.671466	0.337433	0.253416	0.30617	0.399419	0.302665	0	0.725611	0.304629	0.329473	0.283914	0.160047	0.32214	0.959562	0.31019	0.338108	0.300962	0.294744	0.328792	0.317248	0.32789	0.334568	0.339777	0.397783	0.795592	0.359338	0.289773	0.334375
Fe2+	0.0447969	2.4904	0.0624253	4.61249	0.54639	0	0	0	0.232253	0	0	0	0	0	0	0.104199	0	0	0.293719	0.0694392	0	0	0	0	0	0	0	0.194924	0.0489433	0	0	0	0.0364927	0	0.108282	0	0	0	0	0	0	0	0	0	0	0	0	0	0
Mn	0.0680565	0.0370929	0	0.769849	2.03481	0.00473707	0.00702829	0.0105703	0	0.00819157	0.00822575	0.00701575	0.00819512	0.00585904	0.00702167	0.00120778	0.00119132	0.00586156	0.00617869	0.00363169	0.0129373	0.0141191	0.00702239	0	0.00725639	0.00705588	0.00635475	0	0.0129763	0.00612145	0.00819603	0.00632962	0.00364131	0.00586813	0.0118814	0.00703355	0.00703644	0.00665454	0.00470112	0.00703532	0.00703606	0.00586734	0.00703506	0.00704704	0.00927279	0.0141781	0.00587005	0.00704367	0.00705542
Mg	6.66787	3.9171	5.79055	1.49514	4.133	5.11919	4.76042	4.5022	4.5169	4.66921	4.52116	4.71076	4.66917	4.66728	4.72092	4.57035	4.77644	4.67754	4.44799	4.62137	4.4319	4.43369	4.69257	4.98802	4.77058	4.61145	4.64522	4.5363	4.26465	4.67583	4.52131	4.67738	4.73828	4.69105	3.99109	4.64638	4.54921	4.71644	4.69766	4.60627	4.51594	4.56856	4.61229	4.60154	4.62502	4.26921	4.5562	4.65099	4.63392
Ni	0	0	0	0	0	0	0	0	0	0	0	0	0	0	0	0	0	0	0	0	0	0	0	0	0	0	0	0	0	0	0	0	0	0	0	0	0	0	0	0	0	0	0	0	0	0	0	0	0
Zn	0	0	0	0	0	0	0	0	0	0	0	0	0	0	0	0	0	0	0	0	0	0	0	0	0	0	0	0	0	0	0	0	0	0	0	0	0	0	0	0	0	0	0	0	0	0	0	0	0
Li* (not implemented)	0	0	0	0	0	0	0	0	0	0	0	0	0	0	0	0	0	0	0	0	0	0	0	0	0	0	0	0	0	0	0	0	0	0	0	0	0	0	0	0	0	0	0	0	0	0	0	0	0
Ca	0.0286959	0.0782008	0.0334447	0.0671599	0.184295	1.36771	1.2491	1.33708	1.29726	1.41218	1.26199	1.4998	1.26174	1.24807	1.4981	1.32	1.39393	1.25603	1.3464	1.34907	1.26754	1.27401	1.32504	1.3349	1.42091	1.47714	1.44595	1.47845	1.26092	1.38819	1.48552	1.51064	1.48469	1.41331	1.76096	1.48877	1.3811	1.4604	1.46585	1.4758	1.47744	1.48437	1.47426	1.51094	1.29499	1.28082	1.41675	1.62159	1.45027
Na	0.0519302	0.0283036	0.384196	0.0151922	0.0728684	1.05456	1.35145	1.14532	1.2251	1.08492	1.2616	0.963601	1.31854	1.34121	0.983166	1.25244	1.13447	1.33911	1.25577	1.19714	1.22499	1.24973	1.21904	1.2188	1.22237	1.00142	1.1669	1.11456	1.2854	1.24399	1.01314	1.07015	1.14196	1.16329	0.101025	1.04923	1.17315	1.16021	1.11113	1.03608	1.07377	1.0933	1.04409	1.02705	1.40867	1.29552	1.13142	0.921751	1.09018
K	0	0	0	0	0	0.0891852	0.0529289	0.106137	0.292433	0.0969403	0.125663	0.0616401	0.0528995	0.0741273	0.06698	0.127338	0.06639	0.0741592	0.104786	0.145865	0.106286	0.104556	0.0370191	0.129458	0.0349562	0.155867	0.0798966	0.0766177	0.108383	0.0720407	0.0458513	0.0487941	0.0895788	0.0724747	0.0180759	0.0476716	0.0459249	0.0376481	0.0831978	0.0476836	0.0459224	0.0406511	0.0441499	0.0495321	0.0642953	0.106773	0.0565841	0.0406676	0.0867841
Ba	0	0	0	0	0	0	0	0	0	0	0	0	0	0	0	0	0	0	0	0	0	0	0	0	0	0	0	0	0	0	0	0	0	0	0	0	0	0	0	0	0	0	0	0	0	0	0	0	0
Sr	0	0	0	0	0	0	0	0	0	0	0	0	0	0	0	0	0	0	0	0	0	0	0	0	0	0	0	0	0	0	0	0	0	0	0	0	0	0	0	0	0	0	0	0	0	0	0	0	0
Pb	0	0	0	0	0	0	0	0	0	0	0	0	0	0	0	0	0	0	0	0	0	0	0	0	0	0	0	0	0	0	0	0	0	0	0	0	0	0	0	0	0	0	0	0	0	0	0	0	0
F	0	0	0	0	0	0	0	0	0	0	0	0	0	0	0	0	0	0	0	0	0	0	0	0	0	0	0	0	0	0	0	0	0	0	0	0	0	0	0	0	0	0	0	0	0	0	0	0	0
Cl	0	0	0	0	0	0	0	0	0	0	0	0	0	0	0	0	0	0	0	0	0	0	0	0	0	0	0	0	0	0	0	0	0	0	0	0	0	0	0	0	0	0	0	0	0	0	0	0	0
OH*	2	2	2	2	2	2	2	2	2	2	2	2	2	2	2	2	2	2	2	2	2	2	2	2	2	2	2	2	2	2	2	2	2	2	2	2	2	2	2	2	2	2	2	2	2	2	2	2	2
Total	16.9594	16.9719	17.3276	17.0152	17.0184	17.7523	17.7974	17.6294	17.7253	17.6769	17.6981	17.6171	17.7526	17.7748	17.64	17.6998	17.6833	17.7837	17.707	17.6921	17.651	17.6696	17.7292	17.83	17.7852	17.6614	17.7344	17.6597	17.6547	17.7598	17.6101	17.6773	17.7162	17.7558	16.8801	17.6848	17.6988	17.7407	17.745	17.6606	17.6591	17.6911	17.6751	17.6723	17.8489	17.6862	17.707	17.6608	17.7384
Calculation scheme	Џ15	Џ15	Џ15	Џ15	Џ15	Џ13	Џ13	Џ13	Џ13	Џ13	Џ13	Џ13	Џ13	Џ13	Џ13	Џ13	Џ13	Џ13	Џ13	Џ13	Џ13	Џ13	Џ13	Џ13	Џ13	Џ13	Џ13	Џ13	Џ13	Џ13	Џ13	Џ13	Џ13	Џ13	Џ13	Џ13	Џ13	Џ13	Џ13	Џ13	Џ13	Џ13	Џ13	Џ13	Џ13	Џ13	Џ13	Џ13	Џ13
Amphibole group	Fe-Mg-Mn	Fe-Mg-Mn	Fe-Mg-Mn	Fe-Mg-Mn	Fe-Mg-Mn	Ca	Ca	Ca	Na-Ca	Ca	Na-Ca	Ca	Ca	Ca	Ca	Na-Ca	Ca	Ca	Ca	Ca	Na-Ca	Na-Ca	Ca	Ca	Ca	Ca	Ca	Ca	Na-Ca	Ca	Ca	Ca	Ca	Ca	Ca	Ca	Ca	Ca	Ca	Ca	Ca	Ca	Ca	Ca	Ca	Na-Ca	Ca	Ca	Ca
(Ca+Na) (B)	0.0806261	0.106504	0.0905643	0.0685444	0.239638	1.75917	1.85609	1.95916	2	1.91717	1.95121	1.90795	1.88059	1.88864	1.90829	2	1.9115	1.88559	2	2	1.94783	1.95865	1.8519	1.8532	1.89308	1.97302	1.95834	2	2	1.9444	1.93439	1.95232	2	1.89329	1.86198	1.90089	1.90136	1.91751	1.91521	1.89895	1.93801	1.92724	1.8874	1.9152	1.91904	1.99691	1.8978	1.92322	1.88883
Na (B)	0.0519302	0.0283036	0.0571196	0.00138451	0.0553438	0.39146	0.606992	0.62207	0.702735	0.50499	0.689214	0.408151	0.618849	0.640567	0.41019	0.680001	0.517573	0.629565	0.653605	0.650926	0.680284	0.684647	0.526863	0.518297	0.472167	0.495879	0.512395	0.521552	0.739077	0.556218	0.448875	0.441682	0.515313	0.479973	0.101025	0.412112	0.520265	0.457114	0.449362	0.423154	0.460568	0.442867	0.413141	0.404257	0.62405	0.716092	0.48105	0.301626	0.438566
(Na+K) (A)	0	0	0.327076	0.0138077	0.0175246	0.752286	0.797389	0.629385	0.814793	0.676866	0.698051	0.61709	0.752593	0.774775	0.639956	0.69978	0.683287	0.783702	0.706952	0.692075	0.650995	0.669638	0.729194	0.829959	0.785162	0.661405	0.7344	0.66963	0.654707	0.759809	0.610116	0.677259	0.716224	0.755796	0.0180759	0.684793	0.698814	0.740748	0.744962	0.660605	0.659122	0.69108	0.675099	0.672323	0.848916	0.686198	0.706959	0.660793	0.738399
Mg/(Mg+Fe2)	0.993327	0.61133	0.989334	0.244798	0.883235	1	1	1	0.951096	1	1	1	1	1	1	0.977709	1	1	0.938056	0.985197	1	1	1	1	1	1	1	0.958801	0.988654	1	1	1	0.992357	1	0.973586	1	1	1	1	1	1	1	1	1	1	1	1	1	1
Fe3/(Fe3+Alvi)	0	0	0	1	0	1	1	1	0	1	1	1	1	1	1	0.828263	0.8361	1	0.217138	0.895726	1	1	1	1	1	1	1	0	1	1	0.837504	1	1	1	1	0.999362	0.914827	1	1	1	0.854691	0.971145	0.95475	1	1	1	0.982752	1	1
Sum of S2	14.8788	14.8654	14.91	14.9328	14.7612	13.2408	13.1439	13.0408	12.9105	13.0828	13.0488	13.0921	13.1194	13.1114	13.0917	13	13.0885	13.1144	13	13	13.0522	13.0413	13.1481	13.1468	13.1069	13.027	13.0417	12.9901	13	13.0556	13.0656	13.0477	13	13.1067	13	13.0991	13.0986	13.0825	13.0848	13.101	13.062	13.0728	13.1126	13.0848	13.081	13.0031	13.1022	13.0768	13.1112
Amphibole names
						subcalcic sodian	subcalcic sodian	subcalcic sodian	potassian-	subcalcic sodian		subcalcic	subcalcic sodian	subcalcic sodian	subcalcic		subcalcic sodian	subcalcic sodian	subcalcic sodian	subcalcic sodian			subcalcic sodian	subcalcic sodian	subcalcic sodian	subcalcic sodian	subcalcic sodian	subcalcic sodian		subcalcic sodian	subcalcic sodian	sodian	subcalcic sodian	subcalcic sodian	ferrian-	subcalcic sodian	subcalcic sodian	subcalcic sodian	subcalcic sodian	subcalcic sodian	subcalcic sodian	subcalcic sodian	subcalcic sodian	sodian	subcalcic sodian	ferrian-	subcalcic sodian		subcalcic sodian
	magnesio-anthophyllite	anthophyllite	magnesio-gedrite	dannemoreite	tirodite	silicic edenite	silicic edenite	silicic edenite	richterite	silicic edenite	magnesio-kataphorite	silicic edenite	silicic edenite	silicic edenite	silicic edenite	richterite	silicic edenite	silicic edenite	silicic edenite	silicic edenite	magnesio-kataphorite	magnesio-kataphorite	silicic edenite	silicic edenite	silicic edenite	silicic edenite	silicic edenite	silicic edenite	magnesio-kataphorite	silicic edenite	silicic edenite	silicic edenite	silicic edenite	silicic edenite	tremolitic hornblende	silicic edenite	silicic edenite	silicic edenite	silicic edenite	silicic edenite	edenite	edenite	edenite	edenite	silicic edenite	magnesio-kataphorite	edenite	edenite	edenite
Alternative name ?
(monoclinic alternative)			sodian
	magnesio-cummingtonite	cummingtonite	magnesio-cummingtonite
P (kbars)	not valid	not valid	not valid	not valid	not valid	not valid	not valid	not valid	not valid	not valid	not valid	not valid	not valid	not valid	not valid	not valid	not valid	not valid	not valid	not valid	not valid	not valid	not valid	not valid	not valid	not valid	not valid	not valid	not valid	not valid	not valid	not valid	not valid	not valid	not valid	not valid	not valid	not valid	not valid	not valid					not valid	not valid
Hammarstrom and Zen 86																																									0.826957	0.619692	0.70992	0.482878			0.745781	0.675593	0.533761
Hollister et al. 87																																									-0.21369	-0.459272	-0.352364	-0.62138			-0.309873	-0.393036	-0.56109
Johnson & Rutherford 89																																									-0.0502674	-0.234454	-0.154273	-0.356035			-0.122405	-0.184777	-0.310817
Schmidt 92																																									0.826957	0.619692	0.70992	0.482878			0.745781	0.675593	0.533761
Barometers are only valid for certain calcic amphiboles
Hidden calculations	•	•	•	•	•	•	•	•	•	•	•	•	•	•	•	•	•	•	•	•	•	•	•	•	•	•	•	•	•	•	•	•	•	•	•	•	•	•	•	•	•	•	•	•	•	•	•	•	•
Part 1. Anion proportions	raw anions	raw anions	raw anions	raw anions	raw anions	raw anions	raw anions	raw anions	raw anions	raw anions	raw anions	raw anions	raw anions	raw anions	raw anions	raw anions	raw anions	raw anions	raw anions	raw anions	raw anions	raw anions	raw anions	raw anions	raw anions	raw anions	raw anions	raw anions	raw anions	raw anions	raw anions	raw anions	raw anions	raw anions	raw anions	raw anions	raw anions	raw anions	raw anions	raw anions	raw anions	raw anions	raw anions	raw anions	raw anions	raw anions	raw anions	raw anions	raw anions
Si	1.99719	1.74754	1.63137	1.6843	1.83975	1.78782	1.78682	1.78616	1.78582	1.78582	1.78516	1.78483	1.78316	1.78283	1.78083	1.78017	1.7795	1.7785	1.777	1.77318	1.77118	1.77085	1.76985	1.76951	1.76818	1.76785	1.7674	1.76386	1.76319	1.75947	1.7562	1.75468	1.75387	1.75387	1.75072	1.74954	1.74921	1.74886	1.74821	1.74621	1.74255	1.74122	1.73956	1.73922	1.73665	1.73589	1.73323	1.73323	1.73223
Ti	0	0	0.00500759	0	0	0.00300455	0.00225341	0.00575872	0.00500759	0.00250379	0.00751138	0.00350531	0.00475721	0.00425645	0.00350531	0.00701062	0.00100152	0.00475721	0.00662504	0.00926404	0.00801214	0.00751138	0.000500759	0.00876328	0.00430402	0.012519	0.0058739	0.00826252	0.00801214	0.00118429	0.00225341	0.00228096	0.00625948	0.00325493	0.00597655	0.00175266	0.000751138	0.00288687	0.00826252	0.00300455	0.00350531	0.00150228	0.00250379	0.00250379	0.00581381	0.0085129	0.00400607	0.0012519	0.0012519
Al	0.0117693	0.129462	0.438701	0.00117693	0.0100039	0.054433	0.0865043	0.0782658	0.0397214	0.102687	0.0773831	0.10151	0.0988621	0.096214	0.100333	0.0717927	0.0920948	0.0976852	0.073464	0.07091	0.0856216	0.0850332	0.113574	0.0553157	0.101198	0.0900351	0.104882	0.0956255	0.0926832	0.0926303	0.139172	0.101528	0.072087	0.115045	0.0680883	0.130933	0.13623	0.104811	0.111514	0.132993	0.145351	0.137407	0.140937	0.13211	0.108616	0.105924	0.142114	0.139466	0.133876
Cr	0	0	0	0	0	0.0114481	0.0242779	0.00651358	0.00375024	0.019146	0.00611882	0.0175669	0.0252648	0.0264491	0.0183564	0.0148036	0.0132245	0.0252648	0.0192032	0.0138167	0.00473715	0.00493453	0.0240805	0.0112507	0.0189446	0.0148036	0.0210408	0.0171722	0.00355286	0.0223357	0.0240805	0.0194835	0.0122376	0.0242779	0.0128554	0.0230936	0.0305941	0.0204566	0.0262517	0.0264491	0.0276334	0.0278307	0.0238831	0.0264491	0.0198506	0.00394762	0.0284229	0.0238831	0.029015
Fe3+	0	0	0	0	0	0	0	0	0	0	0	0	0	0	0	0	0	0	0	0	0	0	0	0	0	0	0	0	0	0	0	0	0	0	0	0	0	0	0	0	0	0	0	0	0	0	0	0	0
Fe2+	0.00556743	0.283939	0.00765522	0.502461	0.062912	0.0268629	0.039668	0.071124	0.0263061	0.0371626	0.0700105	0.0360491	0.0398071	0.0398071	0.0361883	0.0324303	0.0229657	0.0402247	0.0368884	0.0275588	0.0818413	0.0804494	0.0406423	0.029925	0.0368773	0.0478799	0.0363233	0.0226873	0.0925586	0.0361285	0.039668	0.0337025	0.0228265	0.0386937	0.125557	0.0373018	0.0406423	0.0358306	0.0353532	0.0395288	0.0381369	0.0393896	0.0402247	0.0407814	0.0472898	0.0949247	0.0431476	0.0347965	0.0400855
Mn	0.00845816	0.00422908	0	0.0817622	0.234291	0.000563877	0.000845816	0.00126872	0	0.000986786	0.000986786	0.000845816	0.000986786	0.000704847	0.000845816	0.000140969	0.000140969	0.000704847	0.000716124	0.000422908	0.00155066	0.00169163	0.000845816	0	0.00087401	0.000845816	0.000762644	0	0.00155066	0.000725992	0.000986786	0.000751367	0.000422908	0.000704847	0.00139701	0.000845816	0.000845816	0.000792248	0.000563877	0.000845816	0.000845816	0.000704847	0.000845816	0.000845816	0.00110238	0.00169163	0.000704847	0.000845816	0.000845816
Mg	0.828694	0.446601	0.710096	0.158792	0.475879	0.609363	0.57289	0.540388	0.511607	0.56247	0.542373	0.567928	0.562221	0.561477	0.568672	0.533441	0.565199	0.56247	0.515532	0.538155	0.531208	0.531208	0.565199	0.589018	0.574602	0.552793	0.55748	0.527982	0.509622	0.554545	0.544357	0.555235	0.550312	0.563462	0.469271	0.558748	0.546839	0.561509	0.563462	0.553786	0.542869	0.548823	0.55453	0.552297	0.549838	0.509374	0.547087	0.5585	0.555522
Ni	0	0	0	0	0	0	0	0	0	0	0	0	0	0	0	0	0	0	0	0	0	0	0	0	0	0	0	0	0	0	0	0	0	0	0	0	0	0	0	0	0	0	0	0	0	0	0	0	0
Zn	0	0	0	0	0	0	0	0	0	0	0	0	0	0	0	0	0	0	0	0	0	0	0	0	0	0	0	0	0	0	0	0	0	0	0	0	0	0	0	0	0	0	0	0	0	0	0	0	0
Li	0	0	0	0	0	0	0	0	0	0	0	0	0	0	0	0	0	0	0	0	0	0	0	0	0	0	0	0	0	0	0	0	0	0	0	0	0	0	0	0	0	0	0	0	0	0	0	0	0
Ca	0.00356637	0.00891593	0.00410133	0.00713274	0.0212199	0.162805	0.150323	0.160487	0.146935	0.170116	0.151392	0.180815	0.151927	0.150144	0.180458	0.154067	0.164945	0.151036	0.15605	0.157099	0.151927	0.152641	0.159595	0.157634	0.171145	0.17707	0.173531	0.172077	0.150679	0.164636	0.178854	0.179323	0.172434	0.169759	0.207053	0.179032	0.166015	0.173866	0.175822	0.177427	0.177605	0.178319	0.177249	0.18135	0.153953	0.152819	0.170116	0.194724	0.173861
Na	0.00322698	0.00161349	0.023557	0.000806746	0.00419508	0.0627648	0.08132	0.0687347	0.0693801	0.0653464	0.0756727	0.0580857	0.0793838	0.0806746	0.0592151	0.0730912	0.0671212	0.0805132	0.0727733	0.0697028	0.0734139	0.074866	0.0734139	0.0719617	0.0736155	0.0600219	0.0700207	0.0648624	0.0768022	0.0737672	0.06099	0.0635167	0.0663145	0.0698642	0.00593926	0.0630875	0.0705096	0.0690639	0.0666372	0.0622808	0.0645397	0.0656691	0.0627648	0.0616354	0.0837337	0.0772862	0.067928	0.0553428	0.0653464
K	0	0	0	0	0	0.00530808	0.00318485	0.0063697	0.0165612	0.00583889	0.00753748	0.00371566	0.00318485	0.00445879	0.00403414	0.00743131	0.00392798	0.00445879	0.00607244	0.00849293	0.0063697	0.00626354	0.00222939	0.00764364	0.00210518	0.00934222	0.00479426	0.00445879	0.00647586	0.00427194	0.0027602	0.00289609	0.00520192	0.00435263	0.00106268	0.00286636	0.0027602	0.00224107	0.0049896	0.00286636	0.0027602	0.00244172	0.00265404	0.00297253	0.00382182	0.0063697	0.00339717	0.00244172	0.00520192
Ba	0	0	0	0	0	0	0	0	0	0	0	0	0	0	0	0	0	0	0	0	0	0	0	0	0	0	0	0	0	0	0	0	0	0	0	0	0	0	0	0	0	0	0	0	0	0	0	0	0
Sr	0	0	0	0	0	0	0	0	0	0	0	0	0	0	0	0	0	0	0	0	0	0	0	0	0	0	0	0	0	0	0	0	0	0	0	0	0	0	0	0	0	0	0	0	0	0	0	0	0
Pb	0	0	0	0	0	0	0	0	0	0	0	0	0	0	0	0	0	0	0	0	0	0	0	0	0	0	0	0	0	0	0	0	0	0	0	0	0	0	0	0	0	0	0	0	0	0	0	0	0
F	0	0	0	0	0	0	0	0	0	0	0	0	0	0	0	0	0	0	0	0	0	0	0	0	0	0	0	0	0	0	0	0	0	0	0	0	0	0	0	0	0	0	0	0	0	0	0	0	0
Cl	0	0	0	0	0	0	0	0	0	0	0	0	0	0	0	0	0	0	0	0	0	0	0	0	0	0	0	0	0	0	0	0	0	0	0	0	0	0	0	0	0	0	0	0	0	0	0	0	0
Total-F-Cl	2.85848	2.62231	2.82049	2.43643	2.64825	2.72437	2.74809	2.72507	2.60509	2.75208	2.72414	2.75485	2.74956	2.74701	2.75244	2.67437	2.71012	2.74562	2.66433	2.6686	2.71586	2.71544	2.74993	2.70103	2.75184	2.73316	2.74211	2.67698	2.70513	2.70969	2.74932	2.7134	2.66197	2.74328	2.64792	2.7472	2.74439	2.72032	2.74107	2.74539	2.7458	2.74331	2.74515	2.74017	2.71067	2.69674	2.74015	2.74448	2.73724
Part 2. Cation proportions	raw cations	raw cations	raw cations	raw cations	raw cations	raw cations	raw cations	raw cations	raw cations	raw cations	raw cations	raw cations	raw cations	raw cations	raw cations	raw cations	raw cations	raw cations	raw cations	raw cations	raw cations	raw cations	raw cations	raw cations	raw cations	raw cations	raw cations	raw cations	raw cations	raw cations	raw cations	raw cations	raw cations	raw cations	raw cations	raw cations	raw cations	raw cations	raw cations	raw cations	raw cations	raw cations	raw cations	raw cations	raw cations	raw cations	raw cations	raw cations	raw cations
Si	0.998597	0.873772	0.815687	0.84215	0.919874	0.893911	0.893411	0.893079	0.892912	0.892912	0.892579	0.892413	0.891581	0.891414	0.890416	0.890083	0.88975	0.889251	0.888502	0.886588	0.885589	0.885423	0.884923	0.884757	0.884088	0.883925	0.883698	0.881928	0.881595	0.879734	0.8781	0.877341	0.876935	0.876935	0.87536	0.874771	0.874605	0.874431	0.874105	0.873107	0.871276	0.87061	0.869778	0.869612	0.868327	0.867947	0.866616	0.866616	0.866116
Ti	0	0	0.00250379	0	0	0.00150228	0.00112671	0.00287936	0.00250379	0.0012519	0.00375569	0.00175266	0.0023786	0.00212822	0.00175266	0.00350531	0.000500759	0.0023786	0.00331252	0.00463202	0.00400607	0.00375569	0.000250379	0.00438164	0.00215201	0.00625948	0.00293695	0.00413126	0.00400607	0.000592147	0.00112671	0.00114048	0.00312974	0.00162747	0.00298828	0.000876328	0.000375569	0.00144344	0.00413126	0.00150228	0.00175266	0.000751138	0.0012519	0.0012519	0.0029069	0.00425645	0.00200303	0.000625948	0.000625948
Al	0.0078462	0.0863082	0.292467	0.00078462	0.00666927	0.0362887	0.0576696	0.0521772	0.0264809	0.0684581	0.0515888	0.0676735	0.0659081	0.0641427	0.0668888	0.0478618	0.0613965	0.0651235	0.048976	0.0472733	0.0570811	0.0566888	0.0757158	0.0368771	0.0674655	0.0600234	0.0699214	0.0637504	0.0617888	0.0617535	0.0927813	0.0676852	0.048058	0.0766966	0.0453922	0.087289	0.0908198	0.0698743	0.0743427	0.088662	0.0969006	0.0916044	0.0939582	0.0880736	0.0724106	0.0706158	0.0947429	0.0929775	0.0892505
Cr	0	0	0	0	0	0.00763207	0.0161853	0.00434239	0.00250016	0.012764	0.00407921	0.0117113	0.0168432	0.0176327	0.0122376	0.00986906	0.00881636	0.0168432	0.0128021	0.00921112	0.0031581	0.00328969	0.0160537	0.00750048	0.0126298	0.00986906	0.0140272	0.0114481	0.00236857	0.0148904	0.0160537	0.012989	0.00815842	0.0161853	0.00857029	0.0153957	0.0203961	0.0136377	0.0175011	0.0176327	0.0184222	0.0185538	0.0159221	0.0176327	0.0132337	0.00263175	0.0189486	0.0159221	0.0193434
Fe3+	0	0	0	0	0	0	0	0	0	0	0	0	0	0	0	0	0	0	0	0	0	0	0	0	0	0	0	0	0	0	0	0	0	0	0	0	0	0	0	0	0	0	0	0	0	0	0	0	0
Fe2+	0.00556743	0.283939	0.00765522	0.502461	0.062912	0.0268629	0.039668	0.071124	0.0263061	0.0371626	0.0700105	0.0360491	0.0398071	0.0398071	0.0361883	0.0324303	0.0229657	0.0402247	0.0368884	0.0275588	0.0818413	0.0804494	0.0406423	0.029925	0.0368773	0.0478799	0.0363233	0.0226873	0.0925586	0.0361285	0.039668	0.0337025	0.0228265	0.0386937	0.125557	0.0373018	0.0406423	0.0358306	0.0353532	0.0395288	0.0381369	0.0393896	0.0402247	0.0407814	0.0472898	0.0949247	0.0431476	0.0347965	0.0400855
Mn	0.00845816	0.00422908	0	0.0817622	0.234291	0.000563877	0.000845816	0.00126872	0	0.000986786	0.000986786	0.000845816	0.000986786	0.000704847	0.000845816	0.000140969	0.000140969	0.000704847	0.000716124	0.000422908	0.00155066	0.00169163	0.000845816	0	0.00087401	0.000845816	0.000762644	0	0.00155066	0.000725992	0.000986786	0.000751367	0.000422908	0.000704847	0.00139701	0.000845816	0.000845816	0.000792248	0.000563877	0.000845816	0.000845816	0.000704847	0.000845816	0.000845816	0.00110238	0.00169163	0.000704847	0.000845816	0.000845816
Mg	0.828694	0.446601	0.710096	0.158792	0.475879	0.609363	0.57289	0.540388	0.511607	0.56247	0.542373	0.567928	0.562221	0.561477	0.568672	0.533441	0.565199	0.56247	0.515532	0.538155	0.531208	0.531208	0.565199	0.589018	0.574602	0.552793	0.55748	0.527982	0.509622	0.554545	0.544357	0.555235	0.550312	0.563462	0.469271	0.558748	0.546839	0.561509	0.563462	0.553786	0.542869	0.548823	0.55453	0.552297	0.549838	0.509374	0.547087	0.5585	0.555522
Ni	0	0	0	0	0	0	0	0	0	0	0	0	0	0	0	0	0	0	0	0	0	0	0	0	0	0	0	0	0	0	0	0	0	0	0	0	0	0	0	0	0	0	0	0	0	0	0	0	0
Zn	0	0	0	0	0	0	0	0	0	0	0	0	0	0	0	0	0	0	0	0	0	0	0	0	0	0	0	0	0	0	0	0	0	0	0	0	0	0	0	0	0	0	0	0	0	0	0	0	0
Li	0	0	0	0	0	0	0	0	0	0	0	0	0	0	0	0	0	0	0	0	0	0	0	0	0	0	0	0	0	0	0	0	0	0	0	0	0	0	0	0	0	0	0	0	0	0	0	0	0
Ca	0.00356637	0.00891593	0.00410133	0.00713274	0.0212199	0.162805	0.150323	0.160487	0.146935	0.170116	0.151392	0.180815	0.151927	0.150144	0.180458	0.154067	0.164945	0.151036	0.15605	0.157099	0.151927	0.152641	0.159595	0.157634	0.171145	0.17707	0.173531	0.172077	0.150679	0.164636	0.178854	0.179323	0.172434	0.169759	0.207053	0.179032	0.166015	0.173866	0.175822	0.177427	0.177605	0.178319	0.177249	0.18135	0.153953	0.152819	0.170116	0.194724	0.173861
Na	0.00645397	0.00322698	0.0471139	0.00161349	0.00839016	0.12553	0.16264	0.137469	0.13876	0.130693	0.151345	0.116171	0.158768	0.161349	0.11843	0.146182	0.134242	0.161026	0.145547	0.139406	0.146828	0.149732	0.146828	0.143923	0.147231	0.120044	0.140041	0.129725	0.153604	0.147534	0.12198	0.127033	0.132629	0.139728	0.0118785	0.126175	0.141019	0.138128	0.133274	0.124562	0.129079	0.131338	0.12553	0.123271	0.167467	0.154572	0.135856	0.110686	0.130693
K	0	0	0	0	0	0.0106162	0.0063697	0.0127394	0.0331224	0.0116778	0.015075	0.00743131	0.0063697	0.00891758	0.00806828	0.0148626	0.00785596	0.00891758	0.0121449	0.0169859	0.0127394	0.0125271	0.00445879	0.0152873	0.00421037	0.0186844	0.00958852	0.00891758	0.0129517	0.00854389	0.0055204	0.00579218	0.0104038	0.00870525	0.00212536	0.00573273	0.0055204	0.00448214	0.00997919	0.00573273	0.0055204	0.00488343	0.00530808	0.00594505	0.00764364	0.0127394	0.00679434	0.00488343	0.0104038
Ba	0	0	0	0	0	0	0	0	0	0	0	0	0	0	0	0	0	0	0	0	0	0	0	0	0	0	0	0	0	0	0	0	0	0	0	0	0	0	0	0	0	0	0	0	0	0	0	0	0
Sr	0	0	0	0	0	0	0	0	0	0	0	0	0	0	0	0	0	0	0	0	0	0	0	0	0	0	0	0	0	0	0	0	0	0	0	0	0	0	0	0	0	0	0	0	0	0	0	0	0
Pb	0	0	0	0	0	0	0	0	0	0	0	0	0	0	0	0	0	0	0	0	0	0	0	0	0	0	0	0	0	0	0	0	0	0	0	0	0	0	0	0	0	0	0	0	0	0	0	0	0
F	0	0	0	0	0	0	0	0	0	0	0	0	0	0	0	0	0	0	0	0	0	0	0	0	0	0	0	0	0	0	0	0	0	0	0	0	0	0	0	0	0	0	0	0	0	0	0	0	0
Cl	0	0	0	0	0	0	0	0	0	0	0	0	0	0	0	0	0	0	0	0	0	0	0	0	0	0	0	0	0	0	0	0	0	0	0	0	0	0	0	0	0	0	0	0	0	0	0	0	0
Total	1.85918	1.70699	1.87962	1.5947	1.72924	1.87507	1.90113	1.87595	1.78113	1.88849	1.88319	1.88279	1.89679	1.89772	1.88396	1.83244	1.85581	1.89797	1.82047	1.82733	1.87593	1.87741	1.89451	1.8693	1.90128	1.87739	1.88831	1.82265	1.87072	1.86908	1.87943	1.86099	1.82531	1.8925	1.74959	1.88617	1.88708	1.874	1.88854	1.88279	1.88241	1.88498	1.8846	1.88106	1.88417	1.87157	1.88602	1.88058	1.88675
Si to Ca sum (Sum FM+Ca+Sr)	1.85273	1.70377	1.83251	1.59308	1.72085	1.73893	1.73212	1.72574	1.60924	1.74612	1.71677	1.75919	1.73165	1.72745	1.75746	1.6714	1.71371	1.72803	1.66278	1.67094	1.71636	1.71515	1.74323	1.71009	1.74983	1.73867	1.73868	1.684	1.70417	1.71301	1.75193	1.72817	1.68228	1.74406	1.73559	1.75426	1.74054	1.73139	1.74528	1.75249	1.74781	1.74876	1.75376	1.75184	1.70906	1.70426	1.74337	1.76501	1.74565
Si to Li sum (Sum FM)	1.84916	1.69485	1.82841	1.58595	1.69963	1.57612	1.5818	1.56526	1.46231	1.57601	1.56537	1.57837	1.57973	1.57731	1.577	1.51733	1.54877	1.577	1.50673	1.51384	1.56443	1.56251	1.58363	1.55246	1.57869	1.5616	1.56515	1.51193	1.55349	1.54837	1.57307	1.54884	1.50984	1.5743	1.52854	1.57523	1.57452	1.55752	1.56946	1.57506	1.5702	1.57044	1.57651	1.57049	1.55511	1.55144	1.57325	1.57028	1.57179
Part 3a. Џ13 normalized based on anions
Si	14.0407	13.4042	11.5991	13.8062	14.0718	14.7461	14.685	14.8346	15.8761	14.7307	14.8253	14.7004	14.6741	14.6939	14.6803	15.2519	14.9367	14.6611	15.3319	15.227	14.718	14.7334	14.5286	14.8176	14.5604	14.717	14.6798	15.1662	14.7548	14.7724	14.5134	14.7277	15.1011	14.4828	14.8896	14.4386	14.4423	14.5971	14.4806	14.4126	14.4269	14.4137	14.3445	14.3967	14.5176	14.5456	14.322	14.349	14.327
Ti	0	0	0.035604	0	0	0.0247818	0.0185197	0.0478282	0.0445177	0.0206531	0.06238	0.0288709	0.0391484	0.0350812	0.028896	0.0600647	0.0084065	0.0392162	0.0571606	0.0795543	0.0665786	0.0624945	0.00411072	0.073382	0.0354422	0.104218	0.0487881	0.0710436	0.0670477	0.00994325	0.0186224	0.0191449	0.0538952	0.026878	0.0508298	0.0144643	0.00620175	0.0240956	0.0684393	0.0247985	0.0290211	0.0124358	0.0206464	0.0207255	0.0486008	0.0713322	0.0331028	0.0103642	0.0103542
Al	0.0827406	0.993014	3.11916	0.00964727	0.0765173	0.448968	0.710936	0.650024	0.353125	0.847036	0.642646	0.836071	0.813563	0.792986	0.827097	0.615097	0.773022	0.80527	0.633844	0.608935	0.711492	0.707474	0.932325	0.463203	0.833336	0.749526	0.871142	0.822217	0.775597	0.777717	1.15013	0.85216	0.620681	0.949996	0.579082	1.08056	1.12478	0.87482	0.923683	1.09768	1.20339	1.13744	1.16218	1.09356	0.90798	0.887567	1.17431	1.15461	1.10726
Cr	0	0	0	0	0	0.094425	0.199528	0.0540975	0.0333398	0.157929	0.0508151	0.144687	0.207911	0.217991	0.151321	0.126832	0.111004	0.208271	0.165685	0.11865	0.0393643	0.0410551	0.197677	0.0942115	0.156003	0.123237	0.174763	0.147651	0.0297313	0.187529	0.199003	0.163532	0.105368	0.200477	0.109334	0.190586	0.252599	0.170743	0.217446	0.218301	0.228782	0.230381	0.196942	0.218936	0.165942	0.0330783	0.234863	0.197723	0.239978
Fe3+	0	0	0	0	0	0	0	0	0	0	0	0	0	0	0	0	0	0	0	0	0	0	0	0	0	0	0	0	0	0	0	0	0	0	0	0	0	0	0	0	0	0	0	0	0	0	0	0	0
Fe2+	0.0391402	2.1779	0.0544286	4.11866	0.481198	0.221567	0.326011	0.590709	0.233863	0.306543	0.581418	0.296912	0.327584	0.328086	0.298318	0.277852	0.192768	0.331593	0.318272	0.236659	0.680078	0.669337	0.333632	0.250586	0.303673	0.398592	0.301698	0.195072	0.774554	0.303332	0.327819	0.282877	0.19654	0.319517	1.06784	0.307843	0.335562	0.299064	0.292834	0.326256	0.315743	0.326065	0.331695	0.337575	0.395321	0.795403	0.356535	0.288072	0.33154
Mn	0.0594627	0.0324383	0	0.670204	1.79203	0.00465091	0.00695134	0.0105372	0	0.0081397	0.00819499	0.00696642	0.00812053	0.00580927	0.00697248	0.00120778	0.00118326	0.00581042	0.00617869	0.00363169	0.0128856	0.0140743	0.00694329	0	0.00719719	0.00704127	0.00633446	0	0.0129763	0.00609538	0.00815487	0.00630649	0.00364131	0.00582035	0.0118814	0.00698033	0.00698346	0.00661258	0.00467066	0.00698106	0.00700267	0.00583469	0.00697465	0.00700137	0.0092154	0.0141747	0.00582426	0.00700231	0.0069956
Mg	5.82589	3.42556	5.04879	1.30161	3.63987	5.02608	4.7083	4.4881	4.54821	4.63965	4.50426	4.67764	4.62668	4.62764	4.68785	4.57035	4.74415	4.63673	4.44799	4.62137	4.41418	4.41963	4.63971	4.93232	4.73167	4.6019	4.63038	4.53975	4.26465	4.65592	4.49861	4.66028	4.73828	4.65285	3.99109	4.61122	4.51496	4.6867	4.66722	4.57074	4.49451	4.54313	4.57269	4.57172	4.5964	4.2682	4.52066	4.62369	4.59463
Ni	0	0	0	0	0	0	0	0	0	0	0	0	0	0	0	0	0	0	0	0	0	0	0	0	0	0	0	0	0	0	0	0	0	0	0	0	0	0	0	0	0	0	0	0	0	0	0	0	0
Zn	0	0	0	0	0	0	0	0	0	0	0	0	0	0	0	0	0	0	0	0	0	0	0	0	0	0	0	0	0	0	0	0	0	0	0	0	0	0	0	0	0	0	0	0	0	0	0	0	0
Li	0	0	0	0	0	0	0	0	0	0	0	0	0	0	0	0	0	0	0	0	0	0	0	0	0	0	0	0	0	0	0	0	0	0	0	0	0	0	0	0	0	0	0	0	0	0	0	0	0
Ca	0.0250723	0.0683878	0.0291605	0.058467	0.162306	1.34283	1.23543	1.3329	1.30625	1.40324	1.25727	1.48925	1.25025	1.23747	1.48761	1.32	1.38451	1.24507	1.3464	1.34907	1.26247	1.26997	1.31011	1.31999	1.40932	1.47408	1.44133	1.47957	1.26092	1.38227	1.47806	1.50512	1.48469	1.40181	1.76096	1.47751	1.37069	1.45119	1.45635	1.46442	1.47043	1.47611	1.4616	1.50115	1.28698	1.28052	1.40569	1.61207	1.43797
Na	0.0226864	0.012376	0.16749	0.00661288	0.0320871	0.51769	0.668328	0.570865	0.616792	0.539023	0.628442	0.478413	0.653271	0.664911	0.48814	0.626221	0.5634	0.663713	0.627885	0.598568	0.610048	0.622883	0.602653	0.602594	0.606201	0.499671	0.581586	0.557706	0.642701	0.619344	0.504026	0.533118	0.570979	0.576911	0.0505126	0.520647	0.58216	0.576449	0.551963	0.514043	0.534336	0.543605	0.517562	0.510196	0.699976	0.647605	0.561299	0.458169	0.540469
K	0	0	0	0	0	0.0437815	0.0261747	0.0529025	0.14723	0.0481633	0.0625967	0.0306034	0.026209	0.0367489	0.0332554	0.0636691	0.0329705	0.0367561	0.0523928	0.0729324	0.0529304	0.0521124	0.0183011	0.0640064	0.0173355	0.0777723	0.0398207	0.038338	0.0541917	0.0358669	0.0228105	0.0243079	0.0447894	0.0359423	0.00903794	0.0236555	0.0227895	0.0187053	0.0413294	0.0236579	0.0228522	0.0202124	0.0218854	0.0246055	0.0319487	0.0533736	0.0280714	0.0202144	0.0430242
Ba	0	0	0	0	0	0	0	0	0	0	0	0	0	0	0	0	0	0	0	0	0	0	0	0	0	0	0	0	0	0	0	0	0	0	0	0	0	0	0	0	0	0	0	0	0	0	0	0	0
Sr	0	0	0	0	0	0	0	0	0	0	0	0	0	0	0	0	0	0	0	0	0	0	0	0	0	0	0	0	0	0	0	0	0	0	0	0	0	0	0	0	0	0	0	0	0	0	0	0	0
Pb	0	0	0	0	0	0	0	0	0	0	0	0	0	0	0	0	0	0	0	0	0	0	0	0	0	0	0	0	0	0	0	0	0	0	0	0	0	0	0	0	0	0	0	0	0	0	0	0	0
F	0	0	0	0	0	0	0	0	0	0	0	0	0	0	0	0	0	0	0	0	0	0	0	0	0	0	0	0	0	0	0	0	0	0	0	0	0	0	0	0	0	0	0	0	0	0	0	0	0
Cl	0	0	0	0	0	0	0	0	0	0	0	0	0	0	0	0	0	0	0	0	0	0	0	0	0	0	0	0	0	0	0	0	0	0	0	0	0	0	0	0	0	0	0	0	0	0	0	0	0
Total exc. F,Cl	20.0957	20.1139	20.0537	19.9714	20.2558	22.4709	22.5852	22.6326	23.1594	22.7011	22.6233	22.6898	22.6269	22.6406	22.6897	22.9132	22.7481	22.6336	22.9877	22.9164	22.568	22.5924	22.5741	22.6179	22.6605	22.7531	22.7757	23.0175	22.6372	22.7504	22.7206	22.7745	22.92	22.653	22.5202	22.6721	22.659	22.7054	22.7045	22.6595	22.733	22.709	22.6367	22.6822	22.66	22.5968	22.6423	22.7209	22.6392
Part 3b. Џ15 normalized based on anions
Si	16.1696	15.3854	13.3536	15.8589	16.0364	15.4218	15.4737	15.5251	16.6459	15.3411	15.5976	15.2186	15.4462	15.4809	15.1995	15.9761	15.5758	15.4381	16.0304	15.9178	15.4791	15.4871	15.2291	15.5212	15.1572	15.2518	15.2477	15.7113	15.5195	15.4068	15.0366	15.2301	15.6384	15.0843	15.1308	14.9597	15.0747	15.1514	15.0252	14.9463	14.9549	14.9354	14.8785	14.8919	15.2422	15.2784	14.9128	14.73	14.8847
Ti	0	0	0.0409896	0	0	0.0259173	0.0195144	0.0500543	0.0466764	0.0215088	0.0656296	0.0298886	0.0412081	0.0369601	0.029918	0.062917	0.0087662	0.0412945	0.0597647	0.0831631	0.0700214	0.0656916	0.0043089	0.0768667	0.0368951	0.108005	0.0506755	0.0735971	0.0705224	0.0103703	0.0192937	0.0197981	0.0558126	0.0279944	0.051653	0.0149863	0.00647333	0.0250107	0.071013	0.0257167	0.0300832	0.0128858	0.0214151	0.0214385	0.0510263	0.074926	0.0344684	0.0106393	0.0107573
Al	0.0952862	1.13979	3.59098	0.0110816	0.0872005	0.469539	0.74912	0.680279	0.370249	0.882131	0.676125	0.865543	0.856367	0.835456	0.856349	0.644305	0.806098	0.847946	0.662722	0.636558	0.748283	0.743667	0.977272	0.485199	0.867497	0.77676	0.904842	0.851769	0.815793	0.81112	1.19159	0.881233	0.642763	0.989455	0.58846	1.11956	1.17403	0.908043	0.958419	1.13832	1.24743	1.17861	1.20544	1.13118	0.953294	0.932284	1.22276	1.18526	1.15037
Cr	0	0	0	0	0	0.0987514	0.210244	0.0566154	0.0349565	0.164473	0.0534623	0.149787	0.21885	0.229666	0.156673	0.132855	0.115753	0.219308	0.173233	0.124032	0.0413999	0.0431555	0.207206	0.0986852	0.162398	0.127715	0.181524	0.152958	0.0312721	0.195583	0.206177	0.169111	0.109117	0.208804	0.111104	0.197464	0.263661	0.177227	0.225623	0.226384	0.237154	0.238719	0.204274	0.226468	0.174224	0.0347449	0.244552	0.202972	0.24932
Fe3+	0	0	0	0	0	0	0	0	0	0	0	0	0	0	0	0	0	0	0	0	0	0	0	0	0	0	0	0	0	0	0	0	0	0	0	0	0	0	0	0	0	0	0	0	0	0	0	0	0
Fe2+	0.0450749	2.49981	0.0626617	4.73103	0.548382	0.231719	0.343521	0.618202	0.245203	0.319244	0.611707	0.307379	0.344819	0.345658	0.308869	0.291046	0.201017	0.349167	0.332772	0.247395	0.715245	0.703579	0.349716	0.262485	0.316121	0.413075	0.31337	0.202083	0.814696	0.31636	0.339637	0.292528	0.203532	0.332789	1.08514	0.318953	0.350256	0.310421	0.303847	0.338336	0.327298	0.337865	0.344044	0.349187	0.41505	0.835477	0.371244	0.295719	0.344446
Mn	0.0684787	0.0372329	0	0.769849	2.04223	0.00486401	0.00732469	0.0110276	0	0.00847695	0.0086219	0.00721199	0.00854777	0.00612041	0.00721908	0.00126513	0.00123389	0.00611835	0.00646019	0.00379644	0.0135519	0.0147944	0.00727803	0	0.00749223	0.00729711	0.00657951	0	0.0136489	0.00635718	0.00844886	0.00652165	0.00377086	0.00606211	0.0120738	0.00723225	0.00728927	0.00686371	0.0048463	0.00723955	0.00725894	0.00604584	0.00723431	0.00724222	0.00967531	0.0148889	0.00606454	0.00718821	0.00726792
Mg	6.70924	3.93189	5.81249	1.49514	4.14807	5.25637	4.96118	4.697	4.76876	4.83188	4.73891	4.84253	4.8701	4.87548	4.85365	4.78737	4.94714	4.88246	4.65063	4.83101	4.64245	4.64573	4.86339	5.16654	4.92563	4.76912	4.80951	4.70292	4.48566	4.85589	4.66079	4.81928	4.90685	4.84611	4.05572	4.77764	4.71267	4.86468	4.84273	4.73999	4.659	4.70755	4.74293	4.72899	4.82579	4.48324	4.70716	4.74644	4.77348
Ni	0	0	0	0	0	0	0	0	0	0	0	0	0	0	0	0	0	0	0	0	0	0	0	0	0	0	0	0	0	0	0	0	0	0	0	0	0	0	0	0	0	0	0	0	0	0	0	0	0
Zn	0	0	0	0	0	0	0	0	0	0	0	0	0	0	0	0	0	0	0	0	0	0	0	0	0	0	0	0	0	0	0	0	0	0	0	0	0	0	0	0	0	0	0	0	0	0	0	0	0
Li	0	0	0	0	0	0	0	0	0	0	0	0	0	0	0	0	0	0	0	0	0	0	0	0	0	0	0	0	0	0	0	0	0	0	0	0	0	0	0	0	0	0	0	0	0	0	0	0	0
Ca	0.0288739	0.0784961	0.0335714	0.0671599	0.184967	1.40436	1.30178	1.39493	1.3696	1.46138	1.32277	1.54175	1.31603	1.30375	1.54022	1.38268	1.44375	1.31105	1.40774	1.41027	1.32776	1.33494	1.37327	1.38268	1.4671	1.52764	1.49709	1.53275	1.32627	1.44164	1.53134	1.55647	1.53751	1.46003	1.78947	1.53083	1.43072	1.5063	1.51112	1.51864	1.52424	1.52953	1.51602	1.55279	1.35121	1.34503	1.46369	1.65487	1.49395
Na	0.0261262	0.0142052	0.192825	0.00759608	0.036567	0.54141	0.704224	0.597435	0.646702	0.561356	0.66118	0.495277	0.687641	0.700523	0.505404	0.655958	0.587507	0.698887	0.656491	0.625721	0.641594	0.654749	0.631707	0.631209	0.63105	0.517827	0.604085	0.577751	0.676009	0.645945	0.522196	0.551307	0.591293	0.600874	0.0513307	0.539437	0.607654	0.598341	0.57272	0.533076	0.553891	0.563278	0.536831	0.527747	0.73491	0.680233	0.584456	0.470333	0.561508
K	0	0	0	0	0	0.0457875	0.0275805	0.0553648	0.154369	0.0501588	0.0658577	0.0316821	0.0275879	0.0387171	0.0344316	0.0666925	0.0343813	0.0387041	0.0547798	0.0762409	0.0556675	0.0547784	0.0191834	0.0670458	0.0180462	0.0805982	0.0413612	0.0397159	0.0570002	0.0374074	0.0236329	0.0251372	0.0463829	0.0374352	0.0091843	0.0245092	0.0237875	0.0194157	0.0428836	0.0245339	0.0236885	0.0209439	0.0227002	0.025452	0.0335431	0.0560627	0.0292294	0.0207511	0.044699
Ba	0	0	0	0	0	0	0	0	0	0	0	0	0	0	0	0	0	0	0	0	0	0	0	0	0	0	0	0	0	0	0	0	0	0	0	0	0	0	0	0	0	0	0	0	0	0	0	0	0
Sr	0	0	0	0	0	0	0	0	0	0	0	0	0	0	0	0	0	0	0	0	0	0	0	0	0	0	0	0	0	0	0	0	0	0	0	0	0	0	0	0	0	0	0	0	0	0	0	0	0
Pb	0	0	0	0	0	0	0	0	0	0	0	0	0	0	0	0	0	0	0	0	0	0	0	0	0	0	0	0	0	0	0	0	0	0	0	0	0	0	0	0	0	0	0	0	0	0	0	0	0
F	0	0	0	0	0	0	0	0	0	0	0	0	0	0	0	0	0	0	0	0	0	0	0	0	0	0	0	0	0	0	0	0	0	0	0	0	0	0	0	0	0	0	0	0	0	0	0	0	0
Cl	0	0	0	0	0	0	0	0	0	0	0	0	0	0	0	0	0	0	0	0	0	0	0	0	0	0	0	0	0	0	0	0	0	0	0	0	0	0	0	0	0	0	0	0	0	0	0	0	0
Total exc. F,Cl	23.1427	23.0868	23.0871	22.9407	23.0839	23.5005	23.7982	23.686	24.2824	23.6417	23.8018	23.4896	23.8173	23.8532	23.4922	24.0012	23.7215	23.833	24.035	23.956	23.735	23.7482	23.6624	23.6919	23.5895	23.5798	23.6568	23.8448	23.8104	23.7275	23.5397	23.5515	23.7354	23.5939	22.8849	23.4903	23.6513	23.5677	23.5584	23.4985	23.5649	23.5308	23.4794	23.4624	23.7909	23.7353	23.5764	23.3241	23.5205
Part 4. Iron oxidation state calculations
Џ13 Fe3+	5.80863	5.77228	5.89257	6.05723	5.48844	1.05825	0.829641	0.734784	-0.318773	0.597789	0.753425	0.620344	0.746277	0.718781	0.620549	0.173654	0.503789	0.732894	0.0245531	0.16722	0.863959	0.81518	0.851767	0.764239	0.678914	0.49387	0.448622	-0.0350149	0.725611	0.499221	0.5588	0.450971	0.160047	0.694042	0.959562	0.655899	0.681965	0.589101	0.590903	0.681044	0.534061	0.582088	0.726692	0.635688	0.680011	0.806323	0.715361	0.558161	0.721563
Џ13 Fe3+ = 0 if Fe3+ < 0	5.80863	5.77228	5.89257	6.05723	5.48844	1.05825	0.829641	0.734784	0	0.597789	0.753425	0.620344	0.746277	0.718781	0.620549	0.173654	0.503789	0.732894	0.0245531	0.16722	0.863959	0.81518	0.851767	0.764239	0.678914	0.49387	0.448622	0	0.725611	0.499221	0.5588	0.450971	0.160047	0.694042	0.959562	0.655899	0.681965	0.589101	0.590903	0.681044	0.534061	0.582088	0.726692	0.635688	0.680011	0.806323	0.715361	0.558161	0.721563
Џ15 Fe3+	-0.28539	-0.173699	-0.174228	0.118537	-0.167707	-1.00093	-1.59642	-1.37202	-2.56488	-1.28334	-1.60367	-0.979294	-1.63465	-1.70638	-0.984414	-2.00246	-1.44293	-1.66608	-2.07003	-1.91192	-1.47007	-1.49642	-1.32481	-1.38385	-1.17892	-1.15961	-1.31355	-1.68961	-1.62075	-1.45506	-1.07938	-1.10306	-1.47077	-1.18779	0.230166	-0.980559	-1.30255	-1.13546	-1.11675	-0.997008	-1.12985	-1.06158	-0.958806	-0.924871	-1.58178	-1.47063	-1.15285	-0.648248	-1.041
Џ15 Fe3+ = 0 if Fe3+ < 0	0	0	0	0.118537	0	0	0	0	0	0	0	0	0	0	0	0	0	0	0	0	0	0	0	0	0	0	0	0	0	0	0	0	0	0	0.230166	0	0	0	0	0	0	0	0	0	0	0	0	0	0
Џ13 Fe3+ = total Fe2+ if Fe3+ > total Fe2+	0.0391402	2.1779	0.0544286	4.11866	0.481198	0.221567	0.326011	0.590709	0	0.306543	0.581418	0.296912	0.327584	0.328086	0.298318	0.173654	0.192768	0.331593	0.0245531	0.16722	0.680078	0.669337	0.333632	0.250586	0.303673	0.398592	0.301698	0	0.725611	0.303332	0.327819	0.282877	0.160047	0.319517	0.959562	0.307843	0.335562	0.299064	0.292834	0.326256	0.315743	0.326065	0.331695	0.337575	0.395321	0.795403	0.356535	0.288072	0.33154
Џ13 Fe2+ = total Fe2+ - Fe3+	0	0	0	0	0	0	0	0	0.233863	0	0	0	0	0	0	0.104199	0	0	0.293719	0.0694392	0	0	0	0	0	0	0	0.195072	0.0489433	0	0	0	0.0364927	0	0.108282	0	0	0	0	0	0	0	0	0	0	0	0	0	0
Џ15 Fe3+ = total Fe2+ if Fe3+ > total Fe2+	0	0	0	0.118537	0	0	0	0	0	0	0	0	0	0	0	0	0	0	0	0	0	0	0	0	0	0	0	0	0	0	0	0	0	0	0.230166	0	0	0	0	0	0	0	0	0	0	0	0	0	0
Џ15 Fe2+ = total Fe2+ - Fe3+	0.0450749	2.49981	0.0626617	4.61249	0.548382	0.231719	0.343521	0.618202	0.245203	0.319244	0.611707	0.307379	0.344819	0.345658	0.308869	0.291046	0.201017	0.349167	0.332772	0.247395	0.715245	0.703579	0.349716	0.262485	0.316121	0.413075	0.31337	0.202083	0.814696	0.31636	0.339637	0.292528	0.203532	0.332789	0.85497	0.318953	0.350256	0.310421	0.303847	0.338336	0.327298	0.337865	0.344044	0.349187	0.41505	0.835477	0.371244	0.295719	0.344446
Part 5a. Cations based on 23 O. Џ13 (Fe2+ - Fe3+)
Si	8.03496	7.66378	6.65161	7.94993	7.98909	7.54667	7.47736	7.53773	7.8834	7.46234	7.53606	7.45068	7.45806	7.46357	7.44051	7.65484	7.55105	7.44925	7.67005	7.64129	7.49985	7.49959	7.40137	7.53396	7.38924	7.43837	7.41221	7.57731	7.49565	7.46722	7.34592	7.43674	7.57692	7.35232	7.60343	7.32372	7.32981	7.39322	7.33452	7.3146	7.29819	7.29923	7.28736	7.29921	7.36773	7.40255	7.2741	7.26263	7.27766
Ti	0	0	0.0204174	0	0	0.0126827	0.00942992	0.0243023	0.0221056	0.0104625	0.0317094	0.0146328	0.019897	0.017819	0.0146456	0.0301462	0.00424979	0.0199255	0.0285956	0.0399223	0.0339265	0.031811	0.00209414	0.0373109	0.0179866	0.0526746	0.0246343	0.0354948	0.0340611	0.00502617	0.00942569	0.00966721	0.0270417	0.0136449	0.0259564	0.00733675	0.00314754	0.0122041	0.034665	0.0125856	0.014681	0.00629757	0.0104889	0.010508	0.024665	0.0363024	0.0168128	0.00524573	0.00525961
Al	0.0631324	0.757001	2.38495	0.00740684	0.0579225	0.30636	0.482662	0.440384	0.233796	0.572126	0.435565	0.565	0.55132	0.537049	0.558938	0.411618	0.521054	0.545539	0.422789	0.407438	0.483407	0.480158	0.633276	0.314019	0.56388	0.505107	0.586481	0.547728	0.525352	0.524167	0.776181	0.573731	0.415232	0.643033	0.39428	0.730796	0.761135	0.590779	0.623802	0.742781	0.811681	0.768015	0.787221	0.739258	0.614402	0.602268	0.795242	0.779193	0.749939
Cr	0	0	0	0	0	0.0644323	0.135462	0.0366504	0.0220736	0.106673	0.0344408	0.0977765	0.140893	0.147634	0.10226	0.0848753	0.0748219	0.141095	0.110515	0.0793884	0.0267452	0.0278639	0.134271	0.0638688	0.10556	0.0830498	0.117656	0.0983594	0.0201385	0.126391	0.1343	0.110101	0.0704907	0.135699	0.0744421	0.128895	0.170934	0.115305	0.14685	0.147721	0.154313	0.155556	0.133402	0.148003	0.112288	0.0224457	0.159049	0.133434	0.162535
Fe3+	0.0447969	2.4904	0.0624253	4.74325	0.54639	0.226784	0.331999	0.600298	0	0.31058	0.5911	0.300971	0.332986	0.333294	0.302398	0.174312	0.194903	0.336962	0.0245662	0.16783	0.693095	0.681412	0.339926	0.25482	0.308222	0.402917	0.30467	0	0.73724	0.30666	0.33185	0.285677	0.160606	0.324412	0.980004	0.312296	0.340611	0.302944	0.296645	0.331159	0.319451	0.330244	0.337019	0.342305	0.401253	0.809594	0.362167	0.29161	0.336824
Fe2+	0	0	0	0	0	0	0	0	0.232253	0	0	0	0	0	0	0.104594	0	0	0.293876	0.0696925	0	0	0	0	0	0	0	0.194924	0.0497277	0	0	0	0.0366201	0	0.110589	0	0	0	0	0	0	0	0	0	0	0	0	0	0
Mn	0.0680565	0.0370929	0	0.771838	2.03481	0.00476043	0.00707902	0.0107082	0	0.00824687	0.00833145	0.00706165	0.00825445	0.00590149	0.00706783	0.00121236	0.00119637	0.0059045	0.00618199	0.00364494	0.0131322	0.0143282	0.00707429	0	0.00730501	0.00711768	0.00639684	0	0.0131843	0.00616226	0.00825515	0.00636893	0.00365402	0.00590952	0.0121345	0.0070813	0.00708855	0.00669836	0.00473144	0.00708597	0.00708492	0.00590946	0.0070866	0.00709948	0.00935367	0.0144276	0.00591626	0.00708832	0.00710708
Mg	6.66787	3.9171	5.79055	1.499	4.133	5.14443	4.79478	4.56096	4.5169	4.70073	4.57926	4.74159	4.70297	4.70109	4.75195	4.58766	4.79668	4.7118	4.45037	4.63823	4.49868	4.49937	4.72724	5.01565	4.80255	4.65185	4.67598	4.5363	4.333	4.707	4.55393	4.70642	4.75483	4.72413	4.07612	4.67792	4.5829	4.7475	4.72795	4.63943	4.54731	4.60136	4.64608	4.63578	4.66537	4.34435	4.59207	4.68048	4.66785
Ni	0	0	0	0	0	0	0	0	0	0	0	0	0	0	0	0	0	0	0	0	0	0	0	0	0	0	0	0	0	0	0	0	0	0	0	0	0	0	0	0	0	0	0	0	0	0	0	0	0
Zn	0	0	0	0	0	0	0	0	0	0	0	0	0	0	0	0	0	0	0	0	0	0	0	0	0	0	0	0	0	0	0	0	0	0	0	0	0	0	0	0	0	0	0	0	0	0	0	0	0
Li	0	0	0	0	0	0	0	0	0	0	0	0	0	0	0	0	0	0	0	0	0	0	0	0	0	0	0	0	0	0	0	0	0	0	0	0	0	0	0	0	0	0	0	0	0	0	0	0	0
Ca	0.0286959	0.0782008	0.0334447	0.0673334	0.184295	1.37445	1.25812	1.35453	1.29726	1.42171	1.27821	1.50961	1.27087	1.25712	1.50795	1.325	1.39984	1.26523	1.34711	1.354	1.28664	1.29288	1.33483	1.3423	1.43044	1.49008	1.45553	1.47845	1.28113	1.39744	1.49624	1.52002	1.48987	1.42328	1.79847	1.49888	1.39132	1.47002	1.4753	1.48642	1.4877	1.49503	1.48506	1.52219	1.30629	1.30336	1.4279	1.63187	1.46089
Na	0.0519302	0.0283036	0.384196	0.0152314	0.0728684	1.05976	1.36121	1.16026	1.2251	1.09224	1.27781	0.969905	1.32809	1.35093	0.989629	1.25719	1.13928	1.34892	1.25644	1.2015	1.24345	1.26824	1.22805	1.22555	1.23056	1.01019	1.17463	1.11456	1.306	1.25228	1.02045	1.07679	1.14595	1.1715	0.103178	1.05636	1.18184	1.16785	1.11829	1.04354	1.08122	1.10114	1.05174	1.03469	1.42096	1.31832	1.14033	0.927594	1.09816
K	0	0	0	0	0	0.0896249	0.0533109	0.107523	0.292433	0.0975948	0.127278	0.0620434	0.0532824	0.0746644	0.0674204	0.127821	0.0666712	0.0747025	0.104842	0.146397	0.107887	0.106105	0.0372927	0.130175	0.0351904	0.157233	0.0804258	0.0766177	0.11012	0.0725209	0.0461821	0.0490972	0.0898916	0.0729858	0.018461	0.0479953	0.046265	0.037896	0.0837343	0.0480269	0.0462413	0.0409429	0.0444733	0.0499006	0.0648561	0.108652	0.0570296	0.0409254	0.0874196
Ba	0	0	0	0	0	0	0	0	0	0	0	0	0	0	0	0	0	0	0	0	0	0	0	0	0	0	0	0	0	0	0	0	0	0	0	0	0	0	0	0	0	0	0	0	0	0	0	0	0
Sr	0	0	0	0	0	0	0	0	0	0	0	0	0	0	0	0	0	0	0	0	0	0	0	0	0	0	0	0	0	0	0	0	0	0	0	0	0	0	0	0	0	0	0	0	0	0	0	0	0
Pb	0	0	0	0	0	0	0	0	0	0	0	0	0	0	0	0	0	0	0	0	0	0	0	0	0	0	0	0	0	0	0	0	0	0	0	0	0	0	0	0	0	0	0	0	0	0	0	0	0
F	0	0	0	0	0	0	0	0	0	0	0	0	0	0	0	0	0	0	0	0	0	0	0	0	0	0	0	0	0	0	0	0	0	0	0	0	0	0	0	0	0	0	0	0	0	0	0	0	0
Cl	0	0	0	0	0	0	0	0	0	0	0	0	0	0	0	0	0	0	0	0	0	0	0	0	0	0	0	0	0	0	0	0	0	0	0	0	0	0	0	0	0	0	0	0	0	0	0	0	0
Total	14.9594	14.9719	15.3276	15.054	15.0184	15.8299	15.9114	15.8333	15.7253	15.7827	15.8998	15.7193	15.8666	15.8891	15.7428	15.7593	15.7497	15.8993	15.7153	15.7493	15.8868	15.9018	15.8454	15.9176	15.8909	15.7986	15.8386	15.6597	15.9056	15.8649	15.7227	15.7746	15.7711	15.8669	15.1971	15.7913	15.8151	15.8444	15.8465	15.7733	15.7679	15.8037	15.7899	15.7889	15.9872	15.9623	15.8306	15.7601	15.8536
Part 5b. Cations based on 23 O. Џ15 (Fe2+ - Fe3+)
Si	8.03496	7.66378	6.65161	7.94993	7.98909	7.54667	7.47736	7.53773	7.8834	7.46234	7.53606	7.45068	7.45806	7.46357	7.44051	7.65484	7.55105	7.44925	7.67005	7.64129	7.49985	7.49959	7.40137	7.53396	7.38924	7.43837	7.41221	7.57731	7.49565	7.46722	7.34592	7.43674	7.57692	7.35232	7.60343	7.32372	7.32981	7.39322	7.33452	7.3146	7.29819	7.29923	7.28736	7.29921	7.36773	7.40255	7.2741	7.26263	7.27766
Ti	0	0	0.0204174	0	0	0.0126827	0.00942992	0.0243023	0.0221056	0.0104625	0.0317094	0.0146328	0.019897	0.017819	0.0146456	0.0301462	0.00424979	0.0199255	0.0285956	0.0399223	0.0339265	0.031811	0.00209414	0.0373109	0.0179866	0.0526746	0.0246343	0.0354948	0.0340611	0.00502617	0.00942569	0.00966721	0.0270417	0.0136449	0.0259564	0.00733675	0.00314754	0.0122041	0.034665	0.0125856	0.014681	0.00629757	0.0104889	0.010508	0.024665	0.0363024	0.0168128	0.00524573	0.00525961
Al	0.0631324	0.757001	2.38495	0.00740684	0.0579225	0.30636	0.482662	0.440384	0.233796	0.572126	0.435565	0.565	0.55132	0.537049	0.558938	0.411618	0.521054	0.545539	0.422789	0.407438	0.483407	0.480158	0.633276	0.314019	0.56388	0.505107	0.586481	0.547728	0.525352	0.524167	0.776181	0.573731	0.415232	0.643033	0.39428	0.730796	0.761135	0.590779	0.623802	0.742781	0.811681	0.768015	0.787221	0.739258	0.614402	0.602268	0.795242	0.779193	0.749939
Cr	0	0	0	0	0	0.0644323	0.135462	0.0366504	0.0220736	0.106673	0.0344408	0.0977765	0.140893	0.147634	0.10226	0.0848753	0.0748219	0.141095	0.110515	0.0793884	0.0267452	0.0278639	0.134271	0.0638688	0.10556	0.0830498	0.117656	0.0983594	0.0201385	0.126391	0.1343	0.110101	0.0704907	0.135699	0.0744421	0.128895	0.170934	0.115305	0.14685	0.147721	0.154313	0.155556	0.133402	0.148003	0.112288	0.0224457	0.159049	0.133434	0.162535
Fe3+	0	0	0	0.118843	0	0	0	0	0	0	0	0	0	0	0	0	0	0	0	0	0	0	0	0	0	0	0	0	0	0	0	0	0	0	0.231324	0	0	0	0	0	0	0	0	0	0	0	0	0	0
Fe2+	0.0447969	2.4904	0.0624253	4.62441	0.54639	0.226784	0.331999	0.600298	0.232253	0.31058	0.5911	0.300971	0.332986	0.333294	0.302398	0.278905	0.194903	0.336962	0.318442	0.237523	0.693095	0.681412	0.339926	0.25482	0.308222	0.402917	0.30467	0.194924	0.786968	0.30666	0.33185	0.285677	0.197226	0.324412	0.85927	0.312296	0.340611	0.302944	0.296645	0.331159	0.319451	0.330244	0.337019	0.342305	0.401253	0.809594	0.362167	0.29161	0.336824
Mn	0.0680565	0.0370929	0	0.771838	2.03481	0.00476043	0.00707902	0.0107082	0	0.00824687	0.00833145	0.00706165	0.00825445	0.00590149	0.00706783	0.00121236	0.00119637	0.0059045	0.00618199	0.00364494	0.0131322	0.0143282	0.00707429	0	0.00730501	0.00711768	0.00639684	0	0.0131843	0.00616226	0.00825515	0.00636893	0.00365402	0.00590952	0.0121345	0.0070813	0.00708855	0.00669836	0.00473144	0.00708597	0.00708492	0.00590946	0.0070866	0.00709948	0.00935367	0.0144276	0.00591626	0.00708832	0.00710708
Mg	6.66787	3.9171	5.79055	1.499	4.133	5.14443	4.79478	4.56096	4.5169	4.70073	4.57926	4.74159	4.70297	4.70109	4.75195	4.58766	4.79668	4.7118	4.45037	4.63823	4.49868	4.49937	4.72724	5.01565	4.80255	4.65185	4.67598	4.5363	4.333	4.707	4.55393	4.70642	4.75483	4.72413	4.07612	4.67792	4.5829	4.7475	4.72795	4.63943	4.54731	4.60136	4.64608	4.63578	4.66537	4.34435	4.59207	4.68048	4.66785
Ni	0	0	0	0	0	0	0	0	0	0	0	0	0	0	0	0	0	0	0	0	0	0	0	0	0	0	0	0	0	0	0	0	0	0	0	0	0	0	0	0	0	0	0	0	0	0	0	0	0
Zn	0	0	0	0	0	0	0	0	0	0	0	0	0	0	0	0	0	0	0	0	0	0	0	0	0	0	0	0	0	0	0	0	0	0	0	0	0	0	0	0	0	0	0	0	0	0	0	0	0
Li	0	0	0	0	0	0	0	0	0	0	0	0	0	0	0	0	0	0	0	0	0	0	0	0	0	0	0	0	0	0	0	0	0	0	0	0	0	0	0	0	0	0	0	0	0	0	0	0	0
Ca	0.0286959	0.0782008	0.0334447	0.0673334	0.184295	1.37445	1.25812	1.35453	1.29726	1.42171	1.27821	1.50961	1.27087	1.25712	1.50795	1.325	1.39984	1.26523	1.34711	1.354	1.28664	1.29288	1.33483	1.3423	1.43044	1.49008	1.45553	1.47845	1.28113	1.39744	1.49624	1.52002	1.48987	1.42328	1.79847	1.49888	1.39132	1.47002	1.4753	1.48642	1.4877	1.49503	1.48506	1.52219	1.30629	1.30336	1.4279	1.63187	1.46089
Na	0.0519302	0.0283036	0.384196	0.0152314	0.0728684	1.05976	1.36121	1.16026	1.2251	1.09224	1.27781	0.969905	1.32809	1.35093	0.989629	1.25719	1.13928	1.34892	1.25644	1.2015	1.24345	1.26824	1.22805	1.22555	1.23056	1.01019	1.17463	1.11456	1.306	1.25228	1.02045	1.07679	1.14595	1.1715	0.103178	1.05636	1.18184	1.16785	1.11829	1.04354	1.08122	1.10114	1.05174	1.03469	1.42096	1.31832	1.14033	0.927594	1.09816
K	0	0	0	0	0	0.0896249	0.0533109	0.107523	0.292433	0.0975948	0.127278	0.0620434	0.0532824	0.0746644	0.0674204	0.127821	0.0666712	0.0747025	0.104842	0.146397	0.107887	0.106105	0.0372927	0.130175	0.0351904	0.157233	0.0804258	0.0766177	0.11012	0.0725209	0.0461821	0.0490972	0.0898916	0.0729858	0.018461	0.0479953	0.046265	0.037896	0.0837343	0.0480269	0.0462413	0.0409429	0.0444733	0.0499006	0.0648561	0.108652	0.0570296	0.0409254	0.0874196
Ba	0	0	0	0	0	0	0	0	0	0	0	0	0	0	0	0	0	0	0	0	0	0	0	0	0	0	0	0	0	0	0	0	0	0	0	0	0	0	0	0	0	0	0	0	0	0	0	0	0
Sr	0	0	0	0	0	0	0	0	0	0	0	0	0	0	0	0	0	0	0	0	0	0	0	0	0	0	0	0	0	0	0	0	0	0	0	0	0	0	0	0	0	0	0	0	0	0	0	0	0
Pb	0	0	0	0	0	0	0	0	0	0	0	0	0	0	0	0	0	0	0	0	0	0	0	0	0	0	0	0	0	0	0	0	0	0	0	0	0	0	0	0	0	0	0	0	0	0	0	0	0
F	0	0	0	0	0	0	0	0	0	0	0	0	0	0	0	0	0	0	0	0	0	0	0	0	0	0	0	0	0	0	0	0	0	0	0	0	0	0	0	0	0	0	0	0	0	0	0	0	0
Cl	0	0	0	0	0	0	0	0	0	0	0	0	0	0	0	0	0	0	0	0	0	0	0	0	0	0	0	0	0	0	0	0	0	0	0	0	0	0	0	0	0	0	0	0	0	0	0	0	0
Total	14.9594	14.9719	15.3276	15.054	15.0184	15.8299	15.9114	15.8333	15.7253	15.7827	15.8998	15.7193	15.8666	15.8891	15.7428	15.7593	15.7497	15.8993	15.7153	15.7493	15.8868	15.9018	15.8454	15.9176	15.8909	15.7986	15.8386	15.6597	15.9056	15.8649	15.7227	15.7746	15.7711	15.8669	15.1971	15.7913	15.8151	15.8444	15.8465	15.7733	15.7679	15.8037	15.7899	15.7889	15.9872	15.9623	15.8306	15.7601	15.8536
Part 6a. Intermediate 23 O - recheck sum anions Џ13
Si	16.0699	15.3276	13.3032	15.8999	15.9782	15.0933	14.9547	15.0755	15.7668	14.9247	15.0721	14.9014	14.9161	14.9271	14.881	15.3097	15.1021	14.8985	15.3401	15.2826	14.9997	14.9992	14.8027	15.0679	14.7785	14.8767	14.8244	15.1546	14.9913	14.9344	14.6918	14.8735	15.1538	14.7046	15.2069	14.6474	14.6596	14.7864	14.669	14.6292	14.5964	14.5985	14.5747	14.5984	14.7355	14.8051	14.5482	14.5253	14.5553
Ti	0	0	0.0408349	0	0	0.0253653	0.0188598	0.0486046	0.0442113	0.020925	0.0634187	0.0292656	0.039794	0.0356381	0.0292911	0.0602923	0.00849959	0.0398511	0.0571911	0.0798445	0.067853	0.0636219	0.00418827	0.0746218	0.0359732	0.105349	0.0492686	0.0709896	0.0681222	0.0100523	0.0188514	0.0193344	0.0540834	0.0272897	0.0519127	0.0146735	0.00629508	0.0244082	0.0693299	0.0251711	0.029362	0.0125951	0.0209778	0.021016	0.04933	0.0726048	0.0336257	0.0104915	0.0105192
Al	0.0946987	1.1355	3.57743	0.0111103	0.0868837	0.45954	0.723994	0.660576	0.350695	0.858188	0.653347	0.8475	0.82698	0.805574	0.838407	0.617428	0.781581	0.818308	0.634183	0.611157	0.72511	0.720237	0.949915	0.471029	0.845819	0.757661	0.879721	0.821592	0.788028	0.78625	1.16427	0.860597	0.622848	0.964549	0.591419	1.09619	1.1417	0.886169	0.935703	1.11417	1.21752	1.15202	1.18083	1.10889	0.921604	0.903402	1.19286	1.16879	1.12491
Cr	0	0	0	0	0	0.0966484	0.203192	0.0549756	0.0331104	0.160009	0.0516613	0.146665	0.21134	0.221451	0.153391	0.127313	0.112233	0.211643	0.165773	0.119083	0.0401178	0.0417958	0.201406	0.0958031	0.15834	0.124575	0.176485	0.147539	0.0302078	0.189586	0.20145	0.165151	0.105736	0.203549	0.111663	0.193343	0.2564	0.172958	0.220275	0.221582	0.231469	0.233334	0.200103	0.222004	0.168432	0.0336685	0.238573	0.200151	0.243803
Fe3+	0.0671954	3.7356	0.0936379	7.11487	0.819584	0.340177	0.497998	0.900446	0	0.465869	0.886649	0.451457	0.499479	0.499941	0.453596	0.261468	0.292354	0.505443	0.0368493	0.251745	1.03964	1.02212	0.509889	0.382229	0.462333	0.604376	0.457005	0	1.10586	0.45999	0.497775	0.428516	0.240909	0.486618	1.47001	0.468445	0.510917	0.454415	0.444967	0.496738	0.479177	0.495366	0.505529	0.513457	0.601879	1.21439	0.543251	0.437415	0.505236
Fe2+	0	0	0	0	0	0	0	0	0.232253	0	0	0	0	0	0	0.104594	0	0	0.293876	0.0696925	0	0	0	0	0	0	0	0.194924	0.0497277	0	0	0	0.0366201	0	0.110589	0	0	0	0	0	0	0	0	0	0	0	0	0	0
Mn	0.0680565	0.0370929	0	0.771838	2.03481	0.00476043	0.00707902	0.0107082	0	0.00824687	0.00833145	0.00706165	0.00825445	0.00590149	0.00706783	0.00121236	0.00119637	0.0059045	0.00618199	0.00364494	0.0131322	0.0143282	0.00707429	0	0.00730501	0.00711768	0.00639684	0	0.0131843	0.00616226	0.00825515	0.00636893	0.00365402	0.00590952	0.0121345	0.0070813	0.00708855	0.00669836	0.00473144	0.00708597	0.00708492	0.00590946	0.0070866	0.00709948	0.00935367	0.0144276	0.00591626	0.00708832	0.00710708
Mg	6.66787	3.9171	5.79055	1.499	4.133	5.14443	4.79478	4.56096	4.5169	4.70073	4.57926	4.74159	4.70297	4.70109	4.75195	4.58766	4.79668	4.7118	4.45037	4.63823	4.49868	4.49937	4.72724	5.01565	4.80255	4.65185	4.67598	4.5363	4.333	4.707	4.55393	4.70642	4.75483	4.72413	4.07612	4.67792	4.5829	4.7475	4.72795	4.63943	4.54731	4.60136	4.64608	4.63578	4.66537	4.34435	4.59207	4.68048	4.66785
Ni	0	0	0	0	0	0	0	0	0	0	0	0	0	0	0	0	0	0	0	0	0	0	0	0	0	0	0	0	0	0	0	0	0	0	0	0	0	0	0	0	0	0	0	0	0	0	0	0	0
Zn	0	0	0	0	0	0	0	0	0	0	0	0	0	0	0	0	0	0	0	0	0	0	0	0	0	0	0	0	0	0	0	0	0	0	0	0	0	0	0	0	0	0	0	0	0	0	0	0	0
Li	0	0	0	0	0	0	0	0	0	0	0	0	0	0	0	0	0	0	0	0	0	0	0	0	0	0	0	0	0	0	0	0	0	0	0	0	0	0	0	0	0	0	0	0	0	0	0	0	0
Ca	0.0286959	0.0782008	0.0334447	0.0673334	0.184295	1.37445	1.25812	1.35453	1.29726	1.42171	1.27821	1.50961	1.27087	1.25712	1.50795	1.325	1.39984	1.26523	1.34711	1.354	1.28664	1.29288	1.33483	1.3423	1.43044	1.49008	1.45553	1.47845	1.28113	1.39744	1.49624	1.52002	1.48987	1.42328	1.79847	1.49888	1.39132	1.47002	1.4753	1.48642	1.4877	1.49503	1.48506	1.52219	1.30629	1.30336	1.4279	1.63187	1.46089
Na	0.0259651	0.0141518	0.192098	0.00761571	0.0364342	0.52988	0.680603	0.580132	0.612548	0.54612	0.638906	0.484953	0.664044	0.675466	0.494815	0.628594	0.569638	0.674459	0.628221	0.600752	0.621725	0.63412	0.614023	0.612775	0.615282	0.505094	0.587314	0.557282	0.653001	0.62614	0.510224	0.538397	0.572973	0.585749	0.0515888	0.528178	0.590921	0.583927	0.559146	0.521768	0.540612	0.550572	0.52587	0.517345	0.710479	0.659159	0.570166	0.463797	0.549082
K	0	0	0	0	0	0.0448124	0.0266554	0.0537613	0.146217	0.0487974	0.063639	0.0310217	0.0266412	0.0373322	0.0337102	0.0639104	0.0333356	0.0373512	0.0524208	0.0731985	0.0539435	0.0530526	0.0186463	0.0650877	0.0175952	0.0786164	0.0402129	0.0383088	0.0550602	0.0362605	0.023091	0.0245486	0.0449458	0.0364929	0.00923048	0.0239976	0.0231325	0.018948	0.0418672	0.0240134	0.0231207	0.0204715	0.0222367	0.0249503	0.032428	0.0543259	0.0285148	0.0204627	0.0437098
Ba	0	0	0	0	0	0	0	0	0	0	0	0	0	0	0	0	0	0	0	0	0	0	0	0	0	0	0	0	0	0	0	0	0	0	0	0	0	0	0	0	0	0	0	0	0	0	0	0	0
Sr	0	0	0	0	0	0	0	0	0	0	0	0	0	0	0	0	0	0	0	0	0	0	0	0	0	0	0	0	0	0	0	0	0	0	0	0	0	0	0	0	0	0	0	0	0	0	0	0	0
Pb	0	0	0	0	0	0	0	0	0	0	0	0	0	0	0	0	0	0	0	0	0	0	0	0	0	0	0	0	0	0	0	0	0	0	0	0	0	0	0	0	0	0	0	0	0	0	0	0	0
F	0	0	0	0	0	0	0	0	0	0	0	0	0	0	0	0	0	0	0	0	0	0	0	0	0	0	0	0	0	0	0	0	0	0	0	0	0	0	0	0	0	0	0	0	0	0	0	0	0
Cl	0	0	0	0	0	0	0	0	0	0	0	0	0	0	0	0	0	0	0	0	0	0	0	0	0	0	0	0	0	0	0	0	0	0	0	0	0	0	0	0	0	0	0	0	0	0	0	0	0
Total exc. F, Cl	23.0224	24.2452	23.0312	25.3716	23.2732	23.1134	23.166	23.3001	23	23.1553	23.2955	23.1505	23.1665	23.1666	23.1512	23.0872	23.0975	23.1685	23.0123	23.0839	23.3465	23.3407	23.17	23.1274	23.1541	23.2015	23.1523	23	23.3686	23.1533	23.1659	23.1428	23.0803	23.1622	23.49	23.1561	23.1703	23.1515	23.1483	23.1656	23.1597	23.1651	23.1685	23.1712	23.2006	23.4048	23.1811	23.1458	23.1684
adjustment factor	0.999027	0.948641	0.998645	0.906525	0.988261	0.995094	0.992834	0.987118	1	0.993294	0.987313	0.9935	0.992813	0.992807	0.993469	0.996225	0.995781	0.992728	0.999466	0.996365	0.985156	0.985403	0.992665	0.994491	0.993344	0.991317	0.99342	1	0.984226	0.993378	0.992838	0.993828	0.996521	0.992997	0.97914	0.993257	0.99265	0.993457	0.993593	0.992852	0.993103	0.992872	0.992727	0.992614	0.991353	0.982705	0.992188	0.993701	0.992731
Part 6b. Intermediate 23 O - recheck sum anions Џ15
Si	16.0699	15.3276	13.3032	15.8999	15.9782	15.0933	14.9547	15.0755	15.7668	14.9247	15.0721	14.9014	14.9161	14.9271	14.881	15.3097	15.1021	14.8985	15.3401	15.2826	14.9997	14.9992	14.8027	15.0679	14.7785	14.8767	14.8244	15.1546	14.9913	14.9344	14.6918	14.8735	15.1538	14.7046	15.2069	14.6474	14.6596	14.7864	14.669	14.6292	14.5964	14.5985	14.5747	14.5984	14.7355	14.8051	14.5482	14.5253	14.5553
Ti	0	0	0.0408349	0	0	0.0253653	0.0188598	0.0486046	0.0442113	0.020925	0.0634187	0.0292656	0.039794	0.0356381	0.0292911	0.0602923	0.00849959	0.0398511	0.0571911	0.0798445	0.067853	0.0636219	0.00418827	0.0746218	0.0359732	0.105349	0.0492686	0.0709896	0.0681222	0.0100523	0.0188514	0.0193344	0.0540834	0.0272897	0.0519127	0.0146735	0.00629508	0.0244082	0.0693299	0.0251711	0.029362	0.0125951	0.0209778	0.021016	0.04933	0.0726048	0.0336257	0.0104915	0.0105192
Al	0.0946987	1.1355	3.57743	0.0111103	0.0868837	0.45954	0.723994	0.660576	0.350695	0.858188	0.653347	0.8475	0.82698	0.805574	0.838407	0.617428	0.781581	0.818308	0.634183	0.611157	0.72511	0.720237	0.949915	0.471029	0.845819	0.757661	0.879721	0.821592	0.788028	0.78625	1.16427	0.860597	0.622848	0.964549	0.591419	1.09619	1.1417	0.886169	0.935703	1.11417	1.21752	1.15202	1.18083	1.10889	0.921604	0.903402	1.19286	1.16879	1.12491
Cr	0	0	0	0	0	0.0966484	0.203192	0.0549756	0.0331104	0.160009	0.0516613	0.146665	0.21134	0.221451	0.153391	0.127313	0.112233	0.211643	0.165773	0.119083	0.0401178	0.0417958	0.201406	0.0958031	0.15834	0.124575	0.176485	0.147539	0.0302078	0.189586	0.20145	0.165151	0.105736	0.203549	0.111663	0.193343	0.2564	0.172958	0.220275	0.221582	0.231469	0.233334	0.200103	0.222004	0.168432	0.0336685	0.238573	0.200151	0.243803
Fe3+	0	0	0	0.178264	0	0	0	0	0	0	0	0	0	0	0	0	0	0	0	0	0	0	0	0	0	0	0	0	0	0	0	0	0	0	0.346986	0	0	0	0	0	0	0	0	0	0	0	0	0	0
Fe2+	0.0447969	2.4904	0.0624253	4.62441	0.54639	0.226784	0.331999	0.600298	0.232253	0.31058	0.5911	0.300971	0.332986	0.333294	0.302398	0.278905	0.194903	0.336962	0.318442	0.237523	0.693095	0.681412	0.339926	0.25482	0.308222	0.402917	0.30467	0.194924	0.786968	0.30666	0.33185	0.285677	0.197226	0.324412	0.85927	0.312296	0.340611	0.302944	0.296645	0.331159	0.319451	0.330244	0.337019	0.342305	0.401253	0.809594	0.362167	0.29161	0.336824
Mn	0.0680565	0.0370929	0	0.771838	2.03481	0.00476043	0.00707902	0.0107082	0	0.00824687	0.00833145	0.00706165	0.00825445	0.00590149	0.00706783	0.00121236	0.00119637	0.0059045	0.00618199	0.00364494	0.0131322	0.0143282	0.00707429	0	0.00730501	0.00711768	0.00639684	0	0.0131843	0.00616226	0.00825515	0.00636893	0.00365402	0.00590952	0.0121345	0.0070813	0.00708855	0.00669836	0.00473144	0.00708597	0.00708492	0.00590946	0.0070866	0.00709948	0.00935367	0.0144276	0.00591626	0.00708832	0.00710708
Mg	6.66787	3.9171	5.79055	1.499	4.133	5.14443	4.79478	4.56096	4.5169	4.70073	4.57926	4.74159	4.70297	4.70109	4.75195	4.58766	4.79668	4.7118	4.45037	4.63823	4.49868	4.49937	4.72724	5.01565	4.80255	4.65185	4.67598	4.5363	4.333	4.707	4.55393	4.70642	4.75483	4.72413	4.07612	4.67792	4.5829	4.7475	4.72795	4.63943	4.54731	4.60136	4.64608	4.63578	4.66537	4.34435	4.59207	4.68048	4.66785
Ni	0	0	0	0	0	0	0	0	0	0	0	0	0	0	0	0	0	0	0	0	0	0	0	0	0	0	0	0	0	0	0	0	0	0	0	0	0	0	0	0	0	0	0	0	0	0	0	0	0
Zn	0	0	0	0	0	0	0	0	0	0	0	0	0	0	0	0	0	0	0	0	0	0	0	0	0	0	0	0	0	0	0	0	0	0	0	0	0	0	0	0	0	0	0	0	0	0	0	0	0
Li	0	0	0	0	0	0	0	0	0	0	0	0	0	0	0	0	0	0	0	0	0	0	0	0	0	0	0	0	0	0	0	0	0	0	0	0	0	0	0	0	0	0	0	0	0	0	0	0	0
Ca	0.0286959	0.0782008	0.0334447	0.0673334	0.184295	1.37445	1.25812	1.35453	1.29726	1.42171	1.27821	1.50961	1.27087	1.25712	1.50795	1.325	1.39984	1.26523	1.34711	1.354	1.28664	1.29288	1.33483	1.3423	1.43044	1.49008	1.45553	1.47845	1.28113	1.39744	1.49624	1.52002	1.48987	1.42328	1.79847	1.49888	1.39132	1.47002	1.4753	1.48642	1.4877	1.49503	1.48506	1.52219	1.30629	1.30336	1.4279	1.63187	1.46089
Na	0.0259651	0.0141518	0.192098	0.00761571	0.0364342	0.52988	0.680603	0.580132	0.612548	0.54612	0.638906	0.484953	0.664044	0.675466	0.494815	0.628594	0.569638	0.674459	0.628221	0.600752	0.621725	0.63412	0.614023	0.612775	0.615282	0.505094	0.587314	0.557282	0.653001	0.62614	0.510224	0.538397	0.572973	0.585749	0.0515888	0.528178	0.590921	0.583927	0.559146	0.521768	0.540612	0.550572	0.52587	0.517345	0.710479	0.659159	0.570166	0.463797	0.549082
K	0	0	0	0	0	0.0448124	0.0266554	0.0537613	0.146217	0.0487974	0.063639	0.0310217	0.0266412	0.0373322	0.0337102	0.0639104	0.0333356	0.0373512	0.0524208	0.0731985	0.0539435	0.0530526	0.0186463	0.0650877	0.0175952	0.0786164	0.0402129	0.0383088	0.0550602	0.0362605	0.023091	0.0245486	0.0449458	0.0364929	0.00923048	0.0239976	0.0231325	0.018948	0.0418672	0.0240134	0.0231207	0.0204715	0.0222367	0.0249503	0.032428	0.0543259	0.0285148	0.0204627	0.0437098
Ba	0	0	0	0	0	0	0	0	0	0	0	0	0	0	0	0	0	0	0	0	0	0	0	0	0	0	0	0	0	0	0	0	0	0	0	0	0	0	0	0	0	0	0	0	0	0	0	0	0
Sr	0	0	0	0	0	0	0	0	0	0	0	0	0	0	0	0	0	0	0	0	0	0	0	0	0	0	0	0	0	0	0	0	0	0	0	0	0	0	0	0	0	0	0	0	0	0	0	0	0
Pb	0	0	0	0	0	0	0	0	0	0	0	0	0	0	0	0	0	0	0	0	0	0	0	0	0	0	0	0	0	0	0	0	0	0	0	0	0	0	0	0	0	0	0	0	0	0	0	0	0
F	0	0	0	0	0	0	0	0	0	0	0	0	0	0	0	0	0	0	0	0	0	0	0	0	0	0	0	0	0	0	0	0	0	0	0	0	0	0	0	0	0	0	0	0	0	0	0	0	0
Cl	0	0	0	0	0	0	0	0	0	0	0	0	0	0	0	0	0	0	0	0	0	0	0	0	0	0	0	0	0	0	0	0	0	0	0	0	0	0	0	0	0	0	0	0	0	0	0	0	0
Total exc. F, Cl	23	23	23	23.0594	23	23	23	23	23	23	23	23	23	23	23	23	23	23	23	23	23	23	23	23	23	23	23	23	23	23	23	23	23	23	23.1157	23	23	23	23	23	23	23	23	23	23	23	23	23	23
adjustment factor	1	1	1	0.997423	1	1	1	1	1	1	1	1	1	1	1	1	1	1	1	1	1	1	1	1	1	1	1	1	1	1	1	1	1	1	0.994996	1	1	1	1	1	1	1	1	1	1	1	1	1	1
Part 7a. Formula based on 23 (O) inc. Fe2/Fe3 (Џ13)
Si	8.02714	7.27017	6.64259	7.2068	7.89531	7.50964	7.42378	7.44063	7.8834	7.4123	7.44045	7.40225	7.40446	7.40988	7.39192	7.62594	7.51919	7.39507	7.66596	7.61351	7.38853	7.39012	7.34708	7.49245	7.34006	7.37379	7.36344	7.57731	7.37741	7.41777	7.2933	7.39084	7.55056	7.30083	7.44482	7.27433	7.27594	7.34485	7.28753	7.26231	7.24785	7.2472	7.23436	7.24529	7.30402	7.27452	7.21728	7.21688	7.22475
Ti	0	0	0.0203898	0	0	0.0126205	0.00936235	0.0239892	0.0221056	0.0103923	0.0313071	0.0145377	0.019754	0.0176909	0.0145499	0.0300324	0.00423186	0.0197806	0.0285803	0.0397771	0.0334229	0.0313466	0.00207878	0.0371054	0.0178669	0.0522172	0.0244722	0.0354948	0.0335238	0.00499289	0.00935818	0.00960755	0.0269476	0.0135493	0.0254149	0.00728727	0.0031244	0.0121242	0.0344428	0.0124956	0.0145798	0.00625268	0.0104126	0.0104304	0.0244517	0.0356746	0.0166815	0.00521268	0.00522138
Al	0.063071	0.718122	2.38172	0.00671448	0.0572426	0.304857	0.479204	0.434711	0.233796	0.568289	0.430039	0.561328	0.547358	0.533186	0.555288	0.410065	0.518856	0.541572	0.422563	0.405957	0.476231	0.473149	0.628631	0.312289	0.560126	0.500721	0.582622	0.547728	0.517065	0.520695	0.770621	0.57019	0.413787	0.63853	0.386055	0.725868	0.75554	0.586914	0.619805	0.737472	0.806083	0.76254	0.781496	0.733798	0.609089	0.591852	0.78903	0.774284	0.744488
Cr	0	0	0	0	0	0.0641162	0.134491	0.0361783	0.0220736	0.105957	0.0340039	0.097141	0.13988	0.146572	0.101592	0.0845549	0.0745062	0.140069	0.110456	0.0790999	0.0263482	0.0274571	0.133286	0.0635169	0.104857	0.0823286	0.116882	0.0983594	0.0198208	0.125554	0.133338	0.109421	0.0702454	0.134749	0.0728892	0.128026	0.169677	0.114551	0.145909	0.146665	0.153248	0.154447	0.132432	0.14691	0.111317	0.0220575	0.157806	0.132594	0.161354
Fe3+	0.0447534	2.3625	0.0623407	4.29987	0.539976	0.225672	0.32962	0.592565	0	0.308497	0.5836	0.299015	0.330593	0.330897	0.300423	0.173654	0.194081	0.334512	0.0245531	0.16722	0.682807	0.671466	0.337433	0.253416	0.30617	0.399419	0.302665	0	0.725611	0.304629	0.329473	0.283914	0.160047	0.32214	0.959562	0.31019	0.338108	0.300962	0.294744	0.328792	0.317248	0.32789	0.334568	0.339777	0.397783	0.795592	0.359338	0.289773	0.334375
Fe2+	0	0	0	0	0	0	0	0	0.232253	0	0	0	0	0	0	0.104199	0	0	0.293719	0.0694392	0	0	0	0	0	0	0	0.194924	0.0489433	0	0	0	0.0364927	0	0.108282	0	0	0	0	0	0	0	0	0	0	0	0	0	0
Mn	0.0679902	0.0351878	0	0.69969	2.01093	0.00473707	0.00702829	0.0105703	0	0.00819157	0.00822575	0.00701575	0.00819512	0.00585904	0.00702167	0.00120778	0.00119132	0.00586156	0.00617869	0.00363169	0.0129373	0.0141191	0.00702239	0	0.00725639	0.00705588	0.00635475	0	0.0129763	0.00612145	0.00819603	0.00632962	0.00364131	0.00586813	0.0118814	0.00703355	0.00703644	0.00665454	0.00470112	0.00703532	0.00703606	0.00586734	0.00703506	0.00704704	0.00927279	0.0141781	0.00587005	0.00704367	0.00705542
Mg	6.66139	3.71592	5.78271	1.35888	4.08448	5.11919	4.76042	4.5022	4.5169	4.66921	4.52116	4.71076	4.66917	4.66728	4.72092	4.57035	4.77644	4.67754	4.44799	4.62137	4.4319	4.43369	4.69257	4.98802	4.77058	4.61145	4.64522	4.5363	4.26465	4.67583	4.52131	4.67738	4.73828	4.69105	3.99109	4.64638	4.54921	4.71644	4.69766	4.60627	4.51594	4.56856	4.61229	4.60154	4.62502	4.26921	4.5562	4.65099	4.63392
Ni	0	0	0	0	0	0	0	0	0	0	0	0	0	0	0	0	0	0	0	0	0	0	0	0	0	0	0	0	0	0	0	0	0	0	0	0	0	0	0	0	0	0	0	0	0	0	0	0	0
Zn	0	0	0	0	0	0	0	0	0	0	0	0	0	0	0	0	0	0	0	0	0	0	0	0	0	0	0	0	0	0	0	0	0	0	0	0	0	0	0	0	0	0	0	0	0	0	0	0	0
Li	0	0	0	0	0	0	0	0	0	0	0	0	0	0	0	0	0	0	0	0	0	0	0	0	0	0	0	0	0	0	0	0	0	0	0	0	0	0	0	0	0	0	0	0	0	0	0	0	0
Ca	0.028668	0.0741845	0.0333994	0.0610393	0.182131	1.36771	1.2491	1.33708	1.29726	1.41218	1.26199	1.4998	1.26174	1.24807	1.4981	1.32	1.39393	1.25603	1.3464	1.34907	1.26754	1.27401	1.32504	1.3349	1.42091	1.47714	1.44595	1.47845	1.26092	1.38819	1.48552	1.51064	1.48469	1.41331	1.76096	1.48877	1.3811	1.4604	1.46585	1.4758	1.47744	1.48437	1.47426	1.51094	1.29499	1.28082	1.41675	1.62159	1.45027
Na	0.0518797	0.0268499	0.383675	0.0138077	0.072013	1.05456	1.35145	1.14532	1.2251	1.08492	1.2616	0.963601	1.31854	1.34121	0.983166	1.25244	1.13447	1.33911	1.25577	1.19714	1.22499	1.24973	1.21904	1.2188	1.22237	1.00142	1.1669	1.11456	1.2854	1.24399	1.01314	1.07015	1.14196	1.16329	0.101025	1.04923	1.17315	1.16021	1.11113	1.03608	1.07377	1.0933	1.04409	1.02705	1.40867	1.29552	1.13142	0.921751	1.09018
K	0	0	0	0	0	0.0891852	0.0529289	0.106137	0.292433	0.0969403	0.125663	0.0616401	0.0528995	0.0741273	0.06698	0.127338	0.06639	0.0741592	0.104786	0.145865	0.106286	0.104556	0.0370191	0.129458	0.0349562	0.155867	0.0798966	0.0766177	0.108383	0.0720407	0.0458513	0.0487941	0.0895788	0.0724747	0.0180759	0.0476716	0.0459249	0.0376481	0.0831978	0.0476836	0.0459224	0.0406511	0.0441499	0.0495321	0.0642953	0.106773	0.0565841	0.0406676	0.0867841
Ba	0	0	0	0	0	0	0	0	0	0	0	0	0	0	0	0	0	0	0	0	0	0	0	0	0	0	0	0	0	0	0	0	0	0	0	0	0	0	0	0	0	0	0	0	0	0	0	0	0
Sr	0	0	0	0	0	0	0	0	0	0	0	0	0	0	0	0	0	0	0	0	0	0	0	0	0	0	0	0	0	0	0	0	0	0	0	0	0	0	0	0	0	0	0	0	0	0	0	0	0
Pb	0	0	0	0	0	0	0	0	0	0	0	0	0	0	0	0	0	0	0	0	0	0	0	0	0	0	0	0	0	0	0	0	0	0	0	0	0	0	0	0	0	0	0	0	0	0	0	0	0
F	0	0	0	0	0	0	0	0	0	0	0	0	0	0	0	0	0	0	0	0	0	0	0	0	0	0	0	0	0	0	0	0	0	0	0	0	0	0	0	0	0	0	0	0	0	0	0	0	0
Cl	0	0	0	0	0	0	0	0	0	0	0	0	0	0	0	0	0	0	0	0	0	0	0	0	0	0	0	0	0	0	0	0	0	0	0	0	0	0	0	0	0	0	0	0	0	0	0	0	0
OE FM	23	23	23	23	23	23	23	23	23	23	23	23	23	23	23	23	23	23	23	23	23	23	23	23	23	23	23	23	23	23	23	23	23	23	23	23	23	23	23	23	23	23	23	23	23	23	23	23	23
Part 7b. Formula based on 23 (O) inc. Fe2/Fe3 (Џ15)
Si	8.03496	7.66378	6.65161	7.92944	7.98909	7.54667	7.47736	7.53773	7.8834	7.46234	7.53606	7.45068	7.45806	7.46357	7.44051	7.65484	7.55105	7.44925	7.67005	7.64129	7.49985	7.49959	7.40137	7.53396	7.38924	7.43837	7.41221	7.57731	7.49565	7.46722	7.34592	7.43674	7.57692	7.35232	7.56539	7.32372	7.32981	7.39322	7.33452	7.3146	7.29819	7.29923	7.28736	7.29921	7.36773	7.40255	7.2741	7.26263	7.27766
Ti	0	0	0.0204174	0	0	0.0126827	0.00942992	0.0243023	0.0221056	0.0104625	0.0317094	0.0146328	0.019897	0.017819	0.0146456	0.0301462	0.00424979	0.0199255	0.0285956	0.0399223	0.0339265	0.031811	0.00209414	0.0373109	0.0179866	0.0526746	0.0246343	0.0354948	0.0340611	0.00502617	0.00942569	0.00966721	0.0270417	0.0136449	0.0258265	0.00733675	0.00314754	0.0122041	0.034665	0.0125856	0.014681	0.00629757	0.0104889	0.010508	0.024665	0.0363024	0.0168128	0.00524573	0.00525961
Al	0.0631324	0.757001	2.38495	0.00738775	0.0579225	0.30636	0.482662	0.440384	0.233796	0.572126	0.435565	0.565	0.55132	0.537049	0.558938	0.411618	0.521054	0.545539	0.422789	0.407438	0.483407	0.480158	0.633276	0.314019	0.56388	0.505107	0.586481	0.547728	0.525352	0.524167	0.776181	0.573731	0.415232	0.643033	0.392307	0.730796	0.761135	0.590779	0.623802	0.742781	0.811681	0.768015	0.787221	0.739258	0.614402	0.602268	0.795242	0.779193	0.749939
Cr	0	0	0	0	0	0.0644323	0.135462	0.0366504	0.0220736	0.106673	0.0344408	0.0977765	0.140893	0.147634	0.10226	0.0848753	0.0748219	0.141095	0.110515	0.0793884	0.0267452	0.0278639	0.134271	0.0638688	0.10556	0.0830498	0.117656	0.0983594	0.0201385	0.126391	0.1343	0.110101	0.0704907	0.135699	0.0740696	0.128895	0.170934	0.115305	0.14685	0.147721	0.154313	0.155556	0.133402	0.148003	0.112288	0.0224457	0.159049	0.133434	0.162535
Fe3+	0	0	0	0.118537	0	0	0	0	0	0	0	0	0	0	0	0	0	0	0	0	0	0	0	0	0	0	0	0	0	0	0	0	0	0	0.230166	0	0	0	0	0	0	0	0	0	0	0	0	0	0
Fe2+	0.0447969	2.4904	0.0624253	4.61249	0.54639	0.226784	0.331999	0.600298	0.232253	0.31058	0.5911	0.300971	0.332986	0.333294	0.302398	0.278905	0.194903	0.336962	0.318442	0.237523	0.693095	0.681412	0.339926	0.25482	0.308222	0.402917	0.30467	0.194924	0.786968	0.30666	0.33185	0.285677	0.197226	0.324412	0.85497	0.312296	0.340611	0.302944	0.296645	0.331159	0.319451	0.330244	0.337019	0.342305	0.401253	0.809594	0.362167	0.29161	0.336824
Mn	0.0680565	0.0370929	0	0.769849	2.03481	0.00476043	0.00707902	0.0107082	0	0.00824687	0.00833145	0.00706165	0.00825445	0.00590149	0.00706783	0.00121236	0.00119637	0.0059045	0.00618199	0.00364494	0.0131322	0.0143282	0.00707429	0	0.00730501	0.00711768	0.00639684	0	0.0131843	0.00616226	0.00825515	0.00636893	0.00365402	0.00590952	0.0120738	0.0070813	0.00708855	0.00669836	0.00473144	0.00708597	0.00708492	0.00590946	0.0070866	0.00709948	0.00935367	0.0144276	0.00591626	0.00708832	0.00710708
Mg	6.66787	3.9171	5.79055	1.49514	4.133	5.14443	4.79478	4.56096	4.5169	4.70073	4.57926	4.74159	4.70297	4.70109	4.75195	4.58766	4.79668	4.7118	4.45037	4.63823	4.49868	4.49937	4.72724	5.01565	4.80255	4.65185	4.67598	4.5363	4.333	4.707	4.55393	4.70642	4.75483	4.72413	4.05572	4.67792	4.5829	4.7475	4.72795	4.63943	4.54731	4.60136	4.64608	4.63578	4.66537	4.34435	4.59207	4.68048	4.66785
Ni	0	0	0	0	0	0	0	0	0	0	0	0	0	0	0	0	0	0	0	0	0	0	0	0	0	0	0	0	0	0	0	0	0	0	0	0	0	0	0	0	0	0	0	0	0	0	0	0	0
Zn	0	0	0	0	0	0	0	0	0	0	0	0	0	0	0	0	0	0	0	0	0	0	0	0	0	0	0	0	0	0	0	0	0	0	0	0	0	0	0	0	0	0	0	0	0	0	0	0	0
Li	0	0	0	0	0	0	0	0	0	0	0	0	0	0	0	0	0	0	0	0	0	0	0	0	0	0	0	0	0	0	0	0	0	0	0	0	0	0	0	0	0	0	0	0	0	0	0	0	0
Ca	0.0286959	0.0782008	0.0334447	0.0671599	0.184295	1.37445	1.25812	1.35453	1.29726	1.42171	1.27821	1.50961	1.27087	1.25712	1.50795	1.325	1.39984	1.26523	1.34711	1.354	1.28664	1.29288	1.33483	1.3423	1.43044	1.49008	1.45553	1.47845	1.28113	1.39744	1.49624	1.52002	1.48987	1.42328	1.78947	1.49888	1.39132	1.47002	1.4753	1.48642	1.4877	1.49503	1.48506	1.52219	1.30629	1.30336	1.4279	1.63187	1.46089
Na	0.0519302	0.0283036	0.384196	0.0151922	0.0728684	1.05976	1.36121	1.16026	1.2251	1.09224	1.27781	0.969905	1.32809	1.35093	0.989629	1.25719	1.13928	1.34892	1.25644	1.2015	1.24345	1.26824	1.22805	1.22555	1.23056	1.01019	1.17463	1.11456	1.306	1.25228	1.02045	1.07679	1.14595	1.1715	0.102661	1.05636	1.18184	1.16785	1.11829	1.04354	1.08122	1.10114	1.05174	1.03469	1.42096	1.31832	1.14033	0.927594	1.09816
K	0	0	0	0	0	0.0896249	0.0533109	0.107523	0.292433	0.0975948	0.127278	0.0620434	0.0532824	0.0746644	0.0674204	0.127821	0.0666712	0.0747025	0.104842	0.146397	0.107887	0.106105	0.0372927	0.130175	0.0351904	0.157233	0.0804258	0.0766177	0.11012	0.0725209	0.0461821	0.0490972	0.0898916	0.0729858	0.0183686	0.0479953	0.046265	0.037896	0.0837343	0.0480269	0.0462413	0.0409429	0.0444733	0.0499006	0.0648561	0.108652	0.0570296	0.0409254	0.0874196
Ba	0	0	0	0	0	0	0	0	0	0	0	0	0	0	0	0	0	0	0	0	0	0	0	0	0	0	0	0	0	0	0	0	0	0	0	0	0	0	0	0	0	0	0	0	0	0	0	0	0
Sr	0	0	0	0	0	0	0	0	0	0	0	0	0	0	0	0	0	0	0	0	0	0	0	0	0	0	0	0	0	0	0	0	0	0	0	0	0	0	0	0	0	0	0	0	0	0	0	0	0
Pb	0	0	0	0	0	0	0	0	0	0	0	0	0	0	0	0	0	0	0	0	0	0	0	0	0	0	0	0	0	0	0	0	0	0	0	0	0	0	0	0	0	0	0	0	0	0	0	0	0
F	0	0	0	0	0	0	0	0	0	0	0	0	0	0	0	0	0	0	0	0	0	0	0	0	0	0	0	0	0	0	0	0	0	0	0	0	0	0	0	0	0	0	0	0	0	0	0	0	0
Cl	0	0	0	0	0	0	0	0	0	0	0	0	0	0	0	0	0	0	0	0	0	0	0	0	0	0	0	0	0	0	0	0	0	0	0	0	0	0	0	0	0	0	0	0	0	0	0	0	0
OE FM	23	23	23	23	23	23	23	23	23	23	23	23	23	23	23	23	23	23	23	23	23	23	23	23	23	23	23	23	23	23	23	23	23	23	23	23	23	23	23	23	23	23	23	23	23	23	23	23	23
Part 8. Select either Џ13 or Џ15
Si	8.03496	7.66378	6.65161	7.92944	7.98909	7.50964	7.42378	7.44063	7.8834	7.4123	7.44045	7.40225	7.40446	7.40988	7.39192	7.62594	7.51919	7.39507	7.66596	7.61351	7.38853	7.39012	7.34708	7.49245	7.34006	7.37379	7.36344	7.57731	7.37741	7.41777	7.2933	7.39084	7.55056	7.30083	7.44482	7.27433	7.27594	7.34485	7.28753	7.26231	7.24785	7.2472	7.23436	7.24529	7.30402	7.27452	7.21728	7.21688	7.22475
Ti	0	0	0.0204174	0	0	0.0126205	0.00936235	0.0239892	0.0221056	0.0103923	0.0313071	0.0145377	0.019754	0.0176909	0.0145499	0.0300324	0.00423186	0.0197806	0.0285803	0.0397771	0.0334229	0.0313466	0.00207878	0.0371054	0.0178669	0.0522172	0.0244722	0.0354948	0.0335238	0.00499289	0.00935818	0.00960755	0.0269476	0.0135493	0.0254149	0.00728727	0.0031244	0.0121242	0.0344428	0.0124956	0.0145798	0.00625268	0.0104126	0.0104304	0.0244517	0.0356746	0.0166815	0.00521268	0.00522138
Al	0.0631324	0.757001	2.38495	0.00738775	0.0579225	0.304857	0.479204	0.434711	0.233796	0.568289	0.430039	0.561328	0.547358	0.533186	0.555288	0.410065	0.518856	0.541572	0.422563	0.405957	0.476231	0.473149	0.628631	0.312289	0.560126	0.500721	0.582622	0.547728	0.517065	0.520695	0.770621	0.57019	0.413787	0.63853	0.386055	0.725868	0.75554	0.586914	0.619805	0.737472	0.806083	0.76254	0.781496	0.733798	0.609089	0.591852	0.78903	0.774284	0.744488
Cr	0	0	0	0	0	0.0641162	0.134491	0.0361783	0.0220736	0.105957	0.0340039	0.097141	0.13988	0.146572	0.101592	0.0845549	0.0745062	0.140069	0.110456	0.0790999	0.0263482	0.0274571	0.133286	0.0635169	0.104857	0.0823286	0.116882	0.0983594	0.0198208	0.125554	0.133338	0.109421	0.0702454	0.134749	0.0728892	0.128026	0.169677	0.114551	0.145909	0.146665	0.153248	0.154447	0.132432	0.14691	0.111317	0.0220575	0.157806	0.132594	0.161354
Fe3+	0	0	0	0.118537	0	0.225672	0.32962	0.592565	0	0.308497	0.5836	0.299015	0.330593	0.330897	0.300423	0.173654	0.194081	0.334512	0.0245531	0.16722	0.682807	0.671466	0.337433	0.253416	0.30617	0.399419	0.302665	0	0.725611	0.304629	0.329473	0.283914	0.160047	0.32214	0.959562	0.31019	0.338108	0.300962	0.294744	0.328792	0.317248	0.32789	0.334568	0.339777	0.397783	0.795592	0.359338	0.289773	0.334375
Fe2+	0.0447969	2.4904	0.0624253	4.61249	0.54639	0	0	0	0.232253	0	0	0	0	0	0	0.104199	0	0	0.293719	0.0694392	0	0	0	0	0	0	0	0.194924	0.0489433	0	0	0	0.0364927	0	0.108282	0	0	0	0	0	0	0	0	0	0	0	0	0	0
Mn	0.0680565	0.0370929	0	0.769849	2.03481	0.00473707	0.00702829	0.0105703	0	0.00819157	0.00822575	0.00701575	0.00819512	0.00585904	0.00702167	0.00120778	0.00119132	0.00586156	0.00617869	0.00363169	0.0129373	0.0141191	0.00702239	0	0.00725639	0.00705588	0.00635475	0	0.0129763	0.00612145	0.00819603	0.00632962	0.00364131	0.00586813	0.0118814	0.00703355	0.00703644	0.00665454	0.00470112	0.00703532	0.00703606	0.00586734	0.00703506	0.00704704	0.00927279	0.0141781	0.00587005	0.00704367	0.00705542
Mg	6.66787	3.9171	5.79055	1.49514	4.133	5.11919	4.76042	4.5022	4.5169	4.66921	4.52116	4.71076	4.66917	4.66728	4.72092	4.57035	4.77644	4.67754	4.44799	4.62137	4.4319	4.43369	4.69257	4.98802	4.77058	4.61145	4.64522	4.5363	4.26465	4.67583	4.52131	4.67738	4.73828	4.69105	3.99109	4.64638	4.54921	4.71644	4.69766	4.60627	4.51594	4.56856	4.61229	4.60154	4.62502	4.26921	4.5562	4.65099	4.63392
Ni	0	0	0	0	0	0	0	0	0	0	0	0	0	0	0	0	0	0	0	0	0	0	0	0	0	0	0	0	0	0	0	0	0	0	0	0	0	0	0	0	0	0	0	0	0	0	0	0	0
Zn	0	0	0	0	0	0	0	0	0	0	0	0	0	0	0	0	0	0	0	0	0	0	0	0	0	0	0	0	0	0	0	0	0	0	0	0	0	0	0	0	0	0	0	0	0	0	0	0	0
Li	0	0	0	0	0	0	0	0	0	0	0	0	0	0	0	0	0	0	0	0	0	0	0	0	0	0	0	0	0	0	0	0	0	0	0	0	0	0	0	0	0	0	0	0	0	0	0	0	0
Ca	0.0286959	0.0782008	0.0334447	0.0671599	0.184295	1.36771	1.2491	1.33708	1.29726	1.41218	1.26199	1.4998	1.26174	1.24807	1.4981	1.32	1.39393	1.25603	1.3464	1.34907	1.26754	1.27401	1.32504	1.3349	1.42091	1.47714	1.44595	1.47845	1.26092	1.38819	1.48552	1.51064	1.48469	1.41331	1.76096	1.48877	1.3811	1.4604	1.46585	1.4758	1.47744	1.48437	1.47426	1.51094	1.29499	1.28082	1.41675	1.62159	1.45027
Na	0.0519302	0.0283036	0.384196	0.0151922	0.0728684	1.05456	1.35145	1.14532	1.2251	1.08492	1.2616	0.963601	1.31854	1.34121	0.983166	1.25244	1.13447	1.33911	1.25577	1.19714	1.22499	1.24973	1.21904	1.2188	1.22237	1.00142	1.1669	1.11456	1.2854	1.24399	1.01314	1.07015	1.14196	1.16329	0.101025	1.04923	1.17315	1.16021	1.11113	1.03608	1.07377	1.0933	1.04409	1.02705	1.40867	1.29552	1.13142	0.921751	1.09018
K	0	0	0	0	0	0.0891852	0.0529289	0.106137	0.292433	0.0969403	0.125663	0.0616401	0.0528995	0.0741273	0.06698	0.127338	0.06639	0.0741592	0.104786	0.145865	0.106286	0.104556	0.0370191	0.129458	0.0349562	0.155867	0.0798966	0.0766177	0.108383	0.0720407	0.0458513	0.0487941	0.0895788	0.0724747	0.0180759	0.0476716	0.0459249	0.0376481	0.0831978	0.0476836	0.0459224	0.0406511	0.0441499	0.0495321	0.0642953	0.106773	0.0565841	0.0406676	0.0867841
Ba	0	0	0	0	0	0	0	0	0	0	0	0	0	0	0	0	0	0	0	0	0	0	0	0	0	0	0	0	0	0	0	0	0	0	0	0	0	0	0	0	0	0	0	0	0	0	0	0	0
Sr	0	0	0	0	0	0	0	0	0	0	0	0	0	0	0	0	0	0	0	0	0	0	0	0	0	0	0	0	0	0	0	0	0	0	0	0	0	0	0	0	0	0	0	0	0	0	0	0	0
Pb	0	0	0	0	0	0	0	0	0	0	0	0	0	0	0	0	0	0	0	0	0	0	0	0	0	0	0	0	0	0	0	0	0	0	0	0	0	0	0	0	0	0	0	0	0	0	0	0	0
F	0	0	0	0	0	0	0	0	0	0	0	0	0	0	0	0	0	0	0	0	0	0	0	0	0	0	0	0	0	0	0	0	0	0	0	0	0	0	0	0	0	0	0	0	0	0	0	0	0
Cl	0	0	0	0	0	0	0	0	0	0	0	0	0	0	0	0	0	0	0	0	0	0	0	0	0	0	0	0	0	0	0	0	0	0	0	0	0	0	0	0	0	0	0	0	0	0	0	0	0
OE FM	23	23	23	23	23	23	23	23	23	23	23	23	23	23	23	23	23	23	23	23	23	23	23	23	23	23	23	23	23	23	23	23	23	23	23	23	23	23	23	23	23	23	23	23	23	23	23	23	23
Part 9. Iron oxide, water and site allocation calcs.
FeO calc	0.4	20.4	0.55	35.1955	4.52	0	0	0	1.89	0	0	0	0	0	0	0.873784	0	0	2.44584	0.58096	0	0	0	0	0	0	0	1.63	0.420207	0	0	0	0.304508	0	0.914733	0	0	0	0	0	0	0	0	0	0	0	0	0	0
Fe2O3 calc	0	0	0	1.00516	0	2.14481	3.16721	5.67874	0	2.96717	5.58984	2.87827	3.17832	3.17832	2.88938	1.61829	1.83364	3.21166	0.227213	1.55475	6.53444	6.42331	3.245	2.38929	2.94439	3.82287	2.90016	0	6.92317	2.8846	3.16721	2.6909	1.48413	3.08941	9.00827	2.97828	3.245	2.86082	2.8227	3.15609	3.04496	3.14498	3.21166	3.25611	3.77575	7.57907	3.44503	2.77825	3.20054
H2O - Џ13	2.24124	2.16527	2.2123	2.10526	2.09902	2.14454	2.16813	2.16241	2.04058	2.17027	2.16125	2.172	2.16933	2.16734	2.17017	2.10279	2.13184	2.16641	2.08809	2.09795	2.1594	2.15853	2.16995	2.12744	2.16997	2.15965	2.16213	2.09689	2.1529	2.13666	2.16909	2.13862	2.09241	2.16398	2.11832	2.16651	2.16561	2.14487	2.16094	2.16596	2.16573	2.16427	2.16604	2.16236	2.1418	2.14955	2.16327	2.16339	2.15979
H2O - Џ15	2.23906	2.05406	2.2093	1.9134	2.07438	2.13401	2.15259	2.13456	2.04058	2.15572	2.13383	2.15788	2.15374	2.15175	2.156	2.09485	2.12285	2.15065	2.08698	2.09032	2.12734	2.12702	2.15403	2.11572	2.15553	2.1409	2.1479	2.09689	2.11894	2.12251	2.15356	2.12542	2.08513	2.14883	2.08456	2.1519	2.1497	2.13084	2.14709	2.15048	2.1508	2.14884	2.15029	2.14639	2.12328	2.11237	2.14638	2.14977	2.14409
Site Allocation
Mg+Ni+Li	6.66787	3.9171	5.79055	1.49514	4.133	5.11919	4.76042	4.5022	4.5169	4.66921	4.52116	4.71076	4.66917	4.66728	4.72092	4.57035	4.77644	4.67754	4.44799	4.62137	4.4319	4.43369	4.69257	4.98802	4.77058	4.61145	4.64522	4.5363	4.26465	4.67583	4.52131	4.67738	4.73828	4.69105	3.99109	4.64638	4.54921	4.71644	4.69766	4.60627	4.51594	4.56856	4.61229	4.60154	4.62502	4.26921	4.5562	4.65099	4.63392
Mn+Zn	0.0680565	0.0370929	0	0.769849	2.03481	0.00473707	0.00702829	0.0105703	0	0.00819157	0.00822575	0.00701575	0.00819512	0.00585904	0.00702167	0.00120778	0.00119132	0.00586156	0.00617869	0.00363169	0.0129373	0.0141191	0.00702239	0	0.00725639	0.00705588	0.00635475	0	0.0129763	0.00612145	0.00819603	0.00632962	0.00364131	0.00586813	0.0118814	0.00703355	0.00703644	0.00665454	0.00470112	0.00703532	0.00703606	0.00586734	0.00703506	0.00704704	0.00927279	0.0141781	0.00587005	0.00704367	0.00705542
Ca+Sr	0.0286959	0.0782008	0.0334447	0.0671599	0.184295	1.36771	1.2491	1.33708	1.29726	1.41218	1.26199	1.4998	1.26174	1.24807	1.4981	1.32	1.39393	1.25603	1.3464	1.34907	1.26754	1.27401	1.32504	1.3349	1.42091	1.47714	1.44595	1.47845	1.26092	1.38819	1.48552	1.51064	1.48469	1.41331	1.76096	1.48877	1.3811	1.4604	1.46585	1.4758	1.47744	1.48437	1.47426	1.51094	1.29499	1.28082	1.41675	1.62159	1.45027
K+Ba	0	0	0	0	0	0.0891852	0.0529289	0.106137	0.292433	0.0969403	0.125663	0.0616401	0.0528995	0.0741273	0.06698	0.127338	0.06639	0.0741592	0.104786	0.145865	0.106286	0.104556	0.0370191	0.129458	0.0349562	0.155867	0.0798966	0.0766177	0.108383	0.0720407	0.0458513	0.0487941	0.0895788	0.0724747	0.0180759	0.0476716	0.0459249	0.0376481	0.0831978	0.0476836	0.0459224	0.0406511	0.0441499	0.0495321	0.0642953	0.106773	0.0565841	0.0406676	0.0867841
Al iv (1)	-0.034957	0.336224	1.34839	0.00738775	0.010907	0.304857	0.479204	0.434711	0.116602	0.568289	0.430039	0.561328	0.547358	0.533186	0.555288	0.374058	0.48081	0.541572	0.33404	0.38649	0.476231	0.473149	0.628631	0.312289	0.560126	0.500721	0.582622	0.422689	0.517065	0.520695	0.706695	0.57019	0.413787	0.63853	0.386055	0.72567	0.724061	0.586914	0.619805	0.737472	0.752147	0.752798	0.765639	0.733798	0.609089	0.591852	0.782723	0.774284	0.744488
Al iv (2)	0	0.336224	1.34839	0.00738775	0.010907	0.304857	0.479204	0.434711	0.116602	0.568289	0.430039	0.561328	0.547358	0.533186	0.555288	0.374058	0.48081	0.541572	0.33404	0.38649	0.476231	0.473149	0.628631	0.312289	0.560126	0.500721	0.582622	0.422689	0.517065	0.520695	0.706695	0.57019	0.413787	0.63853	0.386055	0.72567	0.724061	0.586914	0.619805	0.737472	0.752147	0.752798	0.765639	0.733798	0.609089	0.591852	0.782723	0.774284	0.744488
Al vi	0.0631324	0.420777	1.03656	0	0.0470155	0	0	0	0.117195	0	0	0	0	0	0	0.0360065	0.0380455	0	0.088523	0.0194666	0	0	0	0	0	0	0	0.125039	0	0	0.063926	0	0	0	0	0.000198012	0.0314788	0	0	0	0.0539363	0.00974233	0.0158565	0	0	0	0.00630681	0	0
Limit Si max =8	8	7.66378	6.65161	7.92944	7.98909	7.50964	7.42378	7.44063	7.8834	7.4123	7.44045	7.40225	7.40446	7.40988	7.39192	7.62594	7.51919	7.39507	7.66596	7.61351	7.38853	7.39012	7.34708	7.49245	7.34006	7.37379	7.36344	7.57731	7.37741	7.41777	7.2933	7.39084	7.55056	7.30083	7.44482	7.27433	7.27594	7.34485	7.28753	7.26231	7.24785	7.2472	7.23436	7.24529	7.30402	7.27452	7.21728	7.21688	7.22475
Total T site (Si max)	8.06313	8.42078	9.05698	8.05537	8.04702	8.11691	8.37646	8.52807	8.16137	8.40543	8.5194	8.37427	8.44204	8.43822	8.36377	8.32425	8.31086	8.43101	8.25211	8.30556	8.60734	8.59354	8.44851	8.15878	8.32908	8.40847	8.39008	8.25889	8.67343	8.37364	8.5361	8.36397	8.22158	8.4098	8.88874	8.4457	8.54239	8.3594	8.38243	8.48774	8.53901	8.49833	8.49327	8.47621	8.44666	8.7197	8.54013	8.41874	8.47019
Excess T if T>8	0.0631324	0.420777	1.05698	0.0553661	0.0470155	0.116909	0.376459	0.52807	0.161374	0.405433	0.519403	0.374272	0.442044	0.438223	0.363769	0.324247	0.310864	0.431008	0.252113	0.305564	0.607338	0.59354	0.448509	0.15878	0.32908	0.408472	0.390082	0.258893	0.673433	0.373644	0.536096	0.363974	0.221584	0.409798	0.888745	0.445702	0.542388	0.359396	0.382429	0.487739	0.539013	0.498332	0.493269	0.476209	0.446662	0.719698	0.540133	0.418742	0.470192
Limit XsT max =5	0.0631324	0.420777	1.05698	0.0553661	0.0470155	0.116909	0.376459	0.52807	0.161374	0.405433	0.519403	0.374272	0.442044	0.438223	0.363769	0.324247	0.310864	0.431008	0.252113	0.305564	0.607338	0.59354	0.448509	0.15878	0.32908	0.408472	0.390082	0.258893	0.673433	0.373644	0.536096	0.363974	0.221584	0.409798	0.888745	0.445702	0.542388	0.359396	0.382429	0.487739	0.539013	0.498332	0.493269	0.476209	0.446662	0.719698	0.540133	0.418742	0.470192
Total C site (T max)	6.84386	6.86537	6.90996	6.93284	6.76122	5.24083	5.14391	5.04084	4.91053	5.08283	5.04879	5.09205	5.11941	5.11136	5.09171	5	5.0885	5.11441	5	5	5.05217	5.04135	5.1481	5.1468	5.10692	5.02698	5.04166	4.99011	5	5.0556	5.06561	5.04768	5	5.10671	5	5.09911	5.09864	5.08249	5.08479	5.10105	5.06199	5.07276	5.1126	5.0848	5.08096	5.00309	5.1022	5.07678	5.11117
Excess C if C>5	1.84386	1.86537	1.90996	1.93284	1.76122	0.240835	0.143906	0.0408448	0	0.082833	0.0487932	0.0920517	0.119413	0.111359	0.0917076	0	0.0884956	0.114409	0	0	0.052175	0.0413477	0.148098	0.146802	0.106919	0.0269824	0.041655	0	0	0.0555967	0.0656067	0.0476792	0	0.106713	0	0.0991136	0.0986393	0.0824871	0.0847863	0.101046	0.0619928	0.0727593	0.112596	0.0847989	0.0809568	0.00308662	0.102205	0.0767804	0.111166
Limit XsC max =2	1.84386	1.86537	1.90996	1.93284	1.76122	0.240835	0.143906	0.0408448	0	0.082833	0.0487932	0.0920517	0.119413	0.111359	0.0917076	0	0.0884956	0.114409	0	0	0.052175	0.0413477	0.148098	0.146802	0.106919	0.0269824	0.041655	0	0	0.0555967	0.0656067	0.0476792	0	0.106713	0	0.0991136	0.0986393	0.0824871	0.0847863	0.101046	0.0619928	0.0727593	0.112596	0.0847989	0.0809568	0.00308662	0.102205	0.0767804	0.111166
Total B site (C max)	1.92443	1.97188	2.32708	2.01381	2.01752	2.6631	2.74446	2.52325	2.52236	2.57993	2.57239	2.55545	2.69969	2.70065	2.57298	2.57244	2.6169	2.70954	2.60217	2.54621	2.54471	2.56508	2.69218	2.7005	2.75021	2.50554	2.6545	2.59301	2.54632	2.68777	2.56426	2.62846	2.62665	2.68332	1.86198	2.63712	2.65289	2.7031	2.66176	2.61292	2.6132	2.65043	2.63095	2.62279	2.78462	2.57943	2.65037	2.62013	2.65161
Excess B if B>2	0	0	0.327076	0.0138077	0.0175246	0.663101	0.744461	0.523248	0.52236	0.579925	0.572387	0.55545	0.699694	0.700647	0.572976	0.572442	0.616897	0.709543	0.602166	0.54621	0.544709	0.565082	0.692175	0.7005	0.750206	0.505537	0.654503	0.593012	0.546324	0.687768	0.564264	0.628465	0.626645	0.683321	0	0.637121	0.65289	0.7031	0.661764	0.612922	0.6132	0.650429	0.630949	0.622791	0.78462	0.579426	0.650374	0.620125	0.651614
Excess B restricted to Na	0	0	0.327076	0.0138077	0.0175246	0.663101	0.744461	0.523248	0.52236	0.579925	0.572387	0.55545	0.699694	0.700647	0.572976	0.572442	0.616897	0.709543	0.602166	0.54621	0.544709	0.565082	0.692175	0.7005	0.750206	0.505537	0.654503	0.593012	0.546324	0.687768	0.564264	0.628465	0.626645	0.683321	0	0.637121	0.65289	0.7031	0.661764	0.612922	0.6132	0.650429	0.630949	0.622791	0.78462	0.579426	0.650374	0.620125	0.651614
Total A site (No Ca)	0	0	0.327076	0.0138077	0.0175246	0.752286	0.797389	0.629385	0.814793	0.676866	0.698051	0.61709	0.752593	0.774775	0.639956	0.69978	0.683287	0.783702	0.706952	0.692075	0.650995	0.669638	0.729194	0.829959	0.785162	0.661405	0.7344	0.66963	0.654707	0.759809	0.610116	0.677259	0.716224	0.755796	0.0180759	0.684793	0.698814	0.740748	0.744962	0.660605	0.659122	0.69108	0.675099	0.672323	0.848916	0.686198	0.706959	0.660793	0.738399
Excess Na in A	0	0	0	0	0	0	0	0	0	0	0	0	0	0	0	0	0	0	0	0	0	0	0	0	0	0	0	0	0	0	0	0	0	0	0	0	0	0	0	0	0	0	0	0	0	0	0	0	0
Excess Na if K>1	0	0	0	0	0	0	0	0	0	0	0	0	0	0	0	0	0	0	0	0	0	0	0	0	0	0	0	0	0	0	0	0	0	0	0	0	0	0	0	0	0	0	0	0	0	0	0	0	0
Set (Na+K)A to max 1	0	0	0.327076	0.0138077	0.0175246	0.752286	0.797389	0.629385	0.814793	0.676866	0.698051	0.61709	0.752593	0.774775	0.639956	0.69978	0.683287	0.783702	0.706952	0.692075	0.650995	0.669638	0.729194	0.829959	0.785162	0.661405	0.7344	0.66963	0.654707	0.759809	0.610116	0.677259	0.716224	0.755796	0.0180759	0.684793	0.698814	0.740748	0.744962	0.660605	0.659122	0.69108	0.675099	0.672323	0.848916	0.686198	0.706959	0.660793	0.738399
If K>1 set (Na+K)A=KA	0	0	0.327076	0.0138077	0.0175246	0.752286	0.797389	0.629385	0.814793	0.676866	0.698051	0.61709	0.752593	0.774775	0.639956	0.69978	0.683287	0.783702	0.706952	0.692075	0.650995	0.669638	0.729194	0.829959	0.785162	0.661405	0.7344	0.66963	0.654707	0.759809	0.610116	0.677259	0.716224	0.755796	0.0180759	0.684793	0.698814	0.740748	0.744962	0.660605	0.659122	0.69108	0.675099	0.672323	0.848916	0.686198	0.706959	0.660793	0.738399
Na(B)	0.0519302	0.0283036	0.0571196	0.00138451	0.0553438	0.39146	0.606992	0.62207	0.702735	0.50499	0.689214	0.408151	0.618849	0.640567	0.41019	0.680001	0.517573	0.629565	0.653605	0.650926	0.680284	0.684647	0.526863	0.518297	0.472167	0.495879	0.512395	0.521552	0.739077	0.556218	0.448875	0.441682	0.515313	0.479973	0.101025	0.412112	0.520265	0.457114	0.449362	0.423154	0.460568	0.442867	0.413141	0.404257	0.62405	0.716092	0.48105	0.301626	0.438566
(Na+K)A	0	0	0.327076	0.0138077	0.0175246	0.752286	0.797389	0.629385	0.814793	0.676866	0.698051	0.61709	0.752593	0.774775	0.639956	0.69978	0.683287	0.783702	0.706952	0.692075	0.650995	0.669638	0.729194	0.829959	0.785162	0.661405	0.7344	0.66963	0.654707	0.759809	0.610116	0.677259	0.716224	0.755796	0.0180759	0.684793	0.698814	0.740748	0.744962	0.660605	0.659122	0.69108	0.675099	0.672323	0.848916	0.686198	0.706959	0.660793	0.738399
(Ca+Na)B	0.0806261	0.106504	0.0905643	0.0685444	0.239638	1.75917	1.85609	1.95916	2	1.91717	1.95121	1.90795	1.88059	1.88864	1.90829	2	1.9115	1.88559	2	2	1.94783	1.95865	1.8519	1.8532	1.89308	1.97302	1.95834	2	2	1.9444	1.93439	1.95232	2	1.89329	1.86198	1.90089	1.90136	1.91751	1.91521	1.89895	1.93801	1.92724	1.8874	1.9152	1.91904	1.99691	1.8978	1.92322	1.88883
Mg/(Mg + Fe2+)	0.993327	0.61133	0.989334	0.244798	0.883235	1	1	1	0.951096	1	1	1	1	1	1	0.977709	1	1	0.938056	0.985197	1	1	1	1	1	1	1	0.958801	0.988654	1	1	1	0.992357	1	0.973586	1	1	1	1	1	1	1	1	1	1	1	1	1	1
Fe3+/(Fe3+ + Al vi)	0	0	0	1	0	1	1	1	0	1	1	1	1	1	1	0.828263	0.8361	1	0.217138	0.895726	1	1	1	1	1	1	1	0	1	1	0.837504	1	1	1	1	0.999362	0.914827	1	1	1	0.854691	0.971145	0.95475	1	1	1	0.982752	1	1
Part 10. Amphibole specific names
tremolite	tremolite	FALSE	FALSE	FALSE	FALSE	tremolite	FALSE	FALSE	tremolite	FALSE	FALSE	FALSE	FALSE	FALSE	FALSE	tremolite	tremolite	FALSE	tremolite	tremolite	FALSE	FALSE	FALSE	FALSE	FALSE	FALSE	FALSE	tremolite	FALSE	FALSE	FALSE	FALSE	tremolite	FALSE	FALSE	FALSE	FALSE	FALSE	FALSE	FALSE	FALSE	FALSE	FALSE	FALSE	FALSE	FALSE	FALSE	FALSE	FALSE
actinolite	FALSE	actinolite	FALSE	FALSE	actinolite	FALSE	FALSE	FALSE	FALSE	FALSE	FALSE	FALSE	FALSE	FALSE	FALSE	FALSE	FALSE	FALSE	FALSE	FALSE	FALSE	FALSE	FALSE	FALSE	FALSE	FALSE	FALSE	FALSE	FALSE	FALSE	FALSE	FALSE	FALSE	FALSE	FALSE	FALSE	FALSE	FALSE	FALSE	FALSE	FALSE	FALSE	FALSE	FALSE	FALSE	FALSE	FALSE	FALSE	FALSE
ferro-actinolite	FALSE	FALSE	FALSE	ferro-actinolite	FALSE	FALSE	FALSE	FALSE	FALSE	FALSE	FALSE	FALSE	FALSE	FALSE	FALSE	FALSE	FALSE	FALSE	FALSE	FALSE	FALSE	FALSE	FALSE	FALSE	FALSE	FALSE	FALSE	FALSE	FALSE	FALSE	FALSE	FALSE	FALSE	FALSE	FALSE	FALSE	FALSE	FALSE	FALSE	FALSE	FALSE	FALSE	FALSE	FALSE	FALSE	FALSE	FALSE	FALSE	FALSE
tremolitic hornblende	FALSE	FALSE	FALSE	FALSE	FALSE	FALSE	tremolitic hornblende	tremolitic hornblende	FALSE	tremolitic hornblende	tremolitic hornblende	tremolitic hornblende	tremolitic hornblende	tremolitic hornblende	tremolitic hornblende	FALSE	FALSE	tremolitic hornblende	FALSE	FALSE	tremolitic hornblende	tremolitic hornblende	tremolitic hornblende	tremolitic hornblende	tremolitic hornblende	tremolitic hornblende	tremolitic hornblende	FALSE	tremolitic hornblende	tremolitic hornblende	tremolitic hornblende	tremolitic hornblende	FALSE	tremolitic hornblende	tremolitic hornblende	tremolitic hornblende	tremolitic hornblende	tremolitic hornblende	tremolitic hornblende	tremolitic hornblende	FALSE	FALSE	FALSE	FALSE	tremolitic hornblende	tremolitic hornblende	FALSE	FALSE	FALSE
actinolitic hornblende	FALSE	FALSE	FALSE	FALSE	FALSE	FALSE	FALSE	FALSE	FALSE	FALSE	FALSE	FALSE	FALSE	FALSE	FALSE	FALSE	FALSE	FALSE	FALSE	FALSE	FALSE	FALSE	FALSE	FALSE	FALSE	FALSE	FALSE	FALSE	FALSE	FALSE	FALSE	FALSE	FALSE	FALSE	FALSE	FALSE	FALSE	FALSE	FALSE	FALSE	FALSE	FALSE	FALSE	FALSE	FALSE	FALSE	FALSE	FALSE	FALSE
ferro-actinolitic hornblende	FALSE	FALSE	FALSE	FALSE	FALSE	FALSE	FALSE	FALSE	FALSE	FALSE	FALSE	FALSE	FALSE	FALSE	FALSE	FALSE	FALSE	FALSE	FALSE	FALSE	FALSE	FALSE	FALSE	FALSE	FALSE	FALSE	FALSE	FALSE	FALSE	FALSE	FALSE	FALSE	FALSE	FALSE	FALSE	FALSE	FALSE	FALSE	FALSE	FALSE	FALSE	FALSE	FALSE	FALSE	FALSE	FALSE	FALSE	FALSE	FALSE
magnesio-hornblende	FALSE	FALSE	magnesio-hornblende	FALSE	FALSE	FALSE	FALSE	FALSE	FALSE	FALSE	FALSE	FALSE	FALSE	FALSE	FALSE	FALSE	FALSE	FALSE	FALSE	FALSE	FALSE	FALSE	FALSE	FALSE	FALSE	FALSE	FALSE	FALSE	FALSE	FALSE	FALSE	FALSE	FALSE	FALSE	FALSE	FALSE	FALSE	FALSE	FALSE	FALSE	magnesio-hornblende	magnesio-hornblende	magnesio-hornblende	magnesio-hornblende	FALSE	FALSE	magnesio-hornblende	magnesio-hornblende	magnesio-hornblende
ferro-hornblende	FALSE	FALSE	FALSE	FALSE	FALSE	FALSE	FALSE	FALSE	FALSE	FALSE	FALSE	FALSE	FALSE	FALSE	FALSE	FALSE	FALSE	FALSE	FALSE	FALSE	FALSE	FALSE	FALSE	FALSE	FALSE	FALSE	FALSE	FALSE	FALSE	FALSE	FALSE	FALSE	FALSE	FALSE	FALSE	FALSE	FALSE	FALSE	FALSE	FALSE	FALSE	FALSE	FALSE	FALSE	FALSE	FALSE	FALSE	FALSE	FALSE
tschermakitic hornblende	FALSE	FALSE	FALSE	FALSE	FALSE	FALSE	FALSE	FALSE	FALSE	FALSE	FALSE	FALSE	FALSE	FALSE	FALSE	FALSE	FALSE	FALSE	FALSE	FALSE	FALSE	FALSE	FALSE	FALSE	FALSE	FALSE	FALSE	FALSE	FALSE	FALSE	FALSE	FALSE	FALSE	FALSE	FALSE	FALSE	FALSE	FALSE	FALSE	FALSE	FALSE	FALSE	FALSE	FALSE	FALSE	FALSE	FALSE	FALSE	FALSE
ferro-tschermakitic hornblende	FALSE	FALSE	FALSE	FALSE	FALSE	FALSE	FALSE	FALSE	FALSE	FALSE	FALSE	FALSE	FALSE	FALSE	FALSE	FALSE	FALSE	FALSE	FALSE	FALSE	FALSE	FALSE	FALSE	FALSE	FALSE	FALSE	FALSE	FALSE	FALSE	FALSE	FALSE	FALSE	FALSE	FALSE	FALSE	FALSE	FALSE	FALSE	FALSE	FALSE	FALSE	FALSE	FALSE	FALSE	FALSE	FALSE	FALSE	FALSE	FALSE
tschermakite	FALSE	FALSE	FALSE	FALSE	FALSE	FALSE	FALSE	FALSE	FALSE	FALSE	FALSE	FALSE	FALSE	FALSE	FALSE	FALSE	FALSE	FALSE	FALSE	FALSE	FALSE	FALSE	FALSE	FALSE	FALSE	FALSE	FALSE	FALSE	FALSE	FALSE	FALSE	FALSE	FALSE	FALSE	FALSE	FALSE	FALSE	FALSE	FALSE	FALSE	FALSE	FALSE	FALSE	FALSE	FALSE	FALSE	FALSE	FALSE	FALSE
ferro-tschermakite	FALSE	FALSE	FALSE	FALSE	FALSE	FALSE	FALSE	FALSE	FALSE	FALSE	FALSE	FALSE	FALSE	FALSE	FALSE	FALSE	FALSE	FALSE	FALSE	FALSE	FALSE	FALSE	FALSE	FALSE	FALSE	FALSE	FALSE	FALSE	FALSE	FALSE	FALSE	FALSE	FALSE	FALSE	FALSE	FALSE	FALSE	FALSE	FALSE	FALSE	FALSE	FALSE	FALSE	FALSE	FALSE	FALSE	FALSE	FALSE	FALSE
subsilicic-tschermakite	FALSE	FALSE	FALSE	FALSE	FALSE	FALSE	FALSE	FALSE	FALSE	FALSE	FALSE	FALSE	FALSE	FALSE	FALSE	FALSE	FALSE	FALSE	FALSE	FALSE	FALSE	FALSE	FALSE	FALSE	FALSE	FALSE	FALSE	FALSE	FALSE	FALSE	FALSE	FALSE	FALSE	FALSE	FALSE	FALSE	FALSE	FALSE	FALSE	FALSE	FALSE	FALSE	FALSE	FALSE	FALSE	FALSE	FALSE	FALSE	FALSE
subsilicic ferro-tschermakite	FALSE	FALSE	FALSE	FALSE	FALSE	FALSE	FALSE	FALSE	FALSE	FALSE	FALSE	FALSE	FALSE	FALSE	FALSE	FALSE	FALSE	FALSE	FALSE	FALSE	FALSE	FALSE	FALSE	FALSE	FALSE	FALSE	FALSE	FALSE	FALSE	FALSE	FALSE	FALSE	FALSE	FALSE	FALSE	FALSE	FALSE	FALSE	FALSE	FALSE	FALSE	FALSE	FALSE	FALSE	FALSE	FALSE	FALSE	FALSE	FALSE
silicic edenite	FALSE	silicic edenite	FALSE	FALSE	silicic edenite	silicic edenite	silicic edenite	silicic edenite	silicic edenite	silicic edenite	silicic edenite	silicic edenite	silicic edenite	silicic edenite	silicic edenite	silicic edenite	silicic edenite	silicic edenite	silicic edenite	silicic edenite	silicic edenite	silicic edenite	silicic edenite	silicic edenite	silicic edenite	silicic edenite	silicic edenite	silicic edenite	silicic edenite	silicic edenite	silicic edenite	silicic edenite	silicic edenite	silicic edenite	silicic edenite	silicic edenite	silicic edenite	silicic edenite	silicic edenite	silicic edenite	FALSE	FALSE	FALSE	FALSE	silicic edenite	silicic edenite	FALSE	FALSE	FALSE
silicic ferro-edenite	FALSE	FALSE	FALSE	silicic ferro-edenite	FALSE	FALSE	FALSE	FALSE	FALSE	FALSE	FALSE	FALSE	FALSE	FALSE	FALSE	FALSE	FALSE	FALSE	FALSE	FALSE	FALSE	FALSE	FALSE	FALSE	FALSE	FALSE	FALSE	FALSE	FALSE	FALSE	FALSE	FALSE	FALSE	FALSE	FALSE	FALSE	FALSE	FALSE	FALSE	FALSE	FALSE	FALSE	FALSE	FALSE	FALSE	FALSE	FALSE	FALSE	FALSE
edenite	FALSE	FALSE	FALSE	FALSE	FALSE	FALSE	FALSE	FALSE	FALSE	FALSE	FALSE	FALSE	FALSE	FALSE	FALSE	FALSE	FALSE	FALSE	FALSE	FALSE	FALSE	FALSE	FALSE	FALSE	FALSE	FALSE	FALSE	FALSE	FALSE	FALSE	FALSE	FALSE	FALSE	FALSE	FALSE	FALSE	FALSE	FALSE	FALSE	FALSE	edenite	edenite	edenite	edenite	FALSE	FALSE	edenite	edenite	edenite
ferro-edenite	FALSE	FALSE	FALSE	FALSE	FALSE	FALSE	FALSE	FALSE	FALSE	FALSE	FALSE	FALSE	FALSE	FALSE	FALSE	FALSE	FALSE	FALSE	FALSE	FALSE	FALSE	FALSE	FALSE	FALSE	FALSE	FALSE	FALSE	FALSE	FALSE	FALSE	FALSE	FALSE	FALSE	FALSE	FALSE	FALSE	FALSE	FALSE	FALSE	FALSE	FALSE	FALSE	FALSE	FALSE	FALSE	FALSE	FALSE	FALSE	FALSE
edenitic hornblende	FALSE	FALSE	edenitic hornblende	FALSE	FALSE	FALSE	FALSE	FALSE	FALSE	FALSE	FALSE	FALSE	FALSE	FALSE	FALSE	FALSE	FALSE	FALSE	FALSE	FALSE	FALSE	FALSE	FALSE	FALSE	FALSE	FALSE	FALSE	FALSE	FALSE	FALSE	FALSE	FALSE	FALSE	FALSE	FALSE	FALSE	FALSE	FALSE	FALSE	FALSE	FALSE	FALSE	FALSE	FALSE	FALSE	FALSE	FALSE	FALSE	FALSE
ferro-edenitic hornblende	FALSE	FALSE	FALSE	FALSE	FALSE	FALSE	FALSE	FALSE	FALSE	FALSE	FALSE	FALSE	FALSE	FALSE	FALSE	FALSE	FALSE	FALSE	FALSE	FALSE	FALSE	FALSE	FALSE	FALSE	FALSE	FALSE	FALSE	FALSE	FALSE	FALSE	FALSE	FALSE	FALSE	FALSE	FALSE	FALSE	FALSE	FALSE	FALSE	FALSE	FALSE	FALSE	FALSE	FALSE	FALSE	FALSE	FALSE	FALSE	FALSE
pargasitic hornblende	FALSE	FALSE	FALSE	FALSE	FALSE	FALSE	FALSE	FALSE	FALSE	FALSE	FALSE	FALSE	FALSE	FALSE	FALSE	FALSE	FALSE	FALSE	FALSE	FALSE	FALSE	FALSE	FALSE	FALSE	FALSE	FALSE	FALSE	FALSE	FALSE	FALSE	FALSE	FALSE	FALSE	FALSE	FALSE	FALSE	FALSE	FALSE	FALSE	FALSE	FALSE	FALSE	FALSE	FALSE	FALSE	FALSE	FALSE	FALSE	FALSE
ferroan pargasitic hornblende	FALSE	FALSE	FALSE	FALSE	FALSE	FALSE	FALSE	FALSE	FALSE	FALSE	FALSE	FALSE	FALSE	FALSE	FALSE	FALSE	FALSE	FALSE	FALSE	FALSE	FALSE	FALSE	FALSE	FALSE	FALSE	FALSE	FALSE	FALSE	FALSE	FALSE	FALSE	FALSE	FALSE	FALSE	FALSE	FALSE	FALSE	FALSE	FALSE	FALSE	FALSE	FALSE	FALSE	FALSE	FALSE	FALSE	FALSE	FALSE	FALSE
ferro-pargasitic hornblende	FALSE	FALSE	FALSE	FALSE	FALSE	FALSE	FALSE	FALSE	FALSE	FALSE	FALSE	FALSE	FALSE	FALSE	FALSE	FALSE	FALSE	FALSE	FALSE	FALSE	FALSE	FALSE	FALSE	FALSE	FALSE	FALSE	FALSE	FALSE	FALSE	FALSE	FALSE	FALSE	FALSE	FALSE	FALSE	FALSE	FALSE	FALSE	FALSE	FALSE	FALSE	FALSE	FALSE	FALSE	FALSE	FALSE	FALSE	FALSE	FALSE
pargasite	FALSE	FALSE	FALSE	FALSE	FALSE	FALSE	FALSE	FALSE	FALSE	FALSE	FALSE	FALSE	FALSE	FALSE	FALSE	FALSE	FALSE	FALSE	FALSE	FALSE	FALSE	FALSE	FALSE	FALSE	FALSE	FALSE	FALSE	FALSE	FALSE	FALSE	FALSE	FALSE	FALSE	FALSE	FALSE	FALSE	FALSE	FALSE	FALSE	FALSE	FALSE	FALSE	FALSE	FALSE	FALSE	FALSE	FALSE	FALSE	FALSE
ferroan pargasite	FALSE	FALSE	FALSE	FALSE	FALSE	FALSE	FALSE	FALSE	FALSE	FALSE	FALSE	FALSE	FALSE	FALSE	FALSE	FALSE	FALSE	FALSE	FALSE	FALSE	FALSE	FALSE	FALSE	FALSE	FALSE	FALSE	FALSE	FALSE	FALSE	FALSE	FALSE	FALSE	FALSE	FALSE	FALSE	FALSE	FALSE	FALSE	FALSE	FALSE	FALSE	FALSE	FALSE	FALSE	FALSE	FALSE	FALSE	FALSE	FALSE
ferro-pargasite	FALSE	FALSE	FALSE	FALSE	FALSE	FALSE	FALSE	FALSE	FALSE	FALSE	FALSE	FALSE	FALSE	FALSE	FALSE	FALSE	FALSE	FALSE	FALSE	FALSE	FALSE	FALSE	FALSE	FALSE	FALSE	FALSE	FALSE	FALSE	FALSE	FALSE	FALSE	FALSE	FALSE	FALSE	FALSE	FALSE	FALSE	FALSE	FALSE	FALSE	FALSE	FALSE	FALSE	FALSE	FALSE	FALSE	FALSE	FALSE	FALSE
subsilicic pargasite	FALSE	FALSE	FALSE	FALSE	FALSE	FALSE	FALSE	FALSE	FALSE	FALSE	FALSE	FALSE	FALSE	FALSE	FALSE	FALSE	FALSE	FALSE	FALSE	FALSE	FALSE	FALSE	FALSE	FALSE	FALSE	FALSE	FALSE	FALSE	FALSE	FALSE	FALSE	FALSE	FALSE	FALSE	FALSE	FALSE	FALSE	FALSE	FALSE	FALSE	FALSE	FALSE	FALSE	FALSE	FALSE	FALSE	FALSE	FALSE	FALSE
subsilicic ferroan pargasite	FALSE	FALSE	FALSE	FALSE	FALSE	FALSE	FALSE	FALSE	FALSE	FALSE	FALSE	FALSE	FALSE	FALSE	FALSE	FALSE	FALSE	FALSE	FALSE	FALSE	FALSE	FALSE	FALSE	FALSE	FALSE	FALSE	FALSE	FALSE	FALSE	FALSE	FALSE	FALSE	FALSE	FALSE	FALSE	FALSE	FALSE	FALSE	FALSE	FALSE	FALSE	FALSE	FALSE	FALSE	FALSE	FALSE	FALSE	FALSE	FALSE
subsilicic ferro-pargasite	FALSE	FALSE	FALSE	FALSE	FALSE	FALSE	FALSE	FALSE	FALSE	FALSE	FALSE	FALSE	FALSE	FALSE	FALSE	FALSE	FALSE	FALSE	FALSE	FALSE	FALSE	FALSE	FALSE	FALSE	FALSE	FALSE	FALSE	FALSE	FALSE	FALSE	FALSE	FALSE	FALSE	FALSE	FALSE	FALSE	FALSE	FALSE	FALSE	FALSE	FALSE	FALSE	FALSE	FALSE	FALSE	FALSE	FALSE	FALSE	FALSE
magnesio-sadanagaite	FALSE	FALSE	FALSE	FALSE	FALSE	FALSE	FALSE	FALSE	FALSE	FALSE	FALSE	FALSE	FALSE	FALSE	FALSE	FALSE	FALSE	FALSE	FALSE	FALSE	FALSE	FALSE	FALSE	FALSE	FALSE	FALSE	FALSE	FALSE	FALSE	FALSE	FALSE	FALSE	FALSE	FALSE	FALSE	FALSE	FALSE	FALSE	FALSE	FALSE	FALSE	FALSE	FALSE	FALSE	FALSE	FALSE	FALSE	FALSE	FALSE
sadanagaite	FALSE	FALSE	FALSE	FALSE	FALSE	FALSE	FALSE	FALSE	FALSE	FALSE	FALSE	FALSE	FALSE	FALSE	FALSE	FALSE	FALSE	FALSE	FALSE	FALSE	FALSE	FALSE	FALSE	FALSE	FALSE	FALSE	FALSE	FALSE	FALSE	FALSE	FALSE	FALSE	FALSE	FALSE	FALSE	FALSE	FALSE	FALSE	FALSE	FALSE	FALSE	FALSE	FALSE	FALSE	FALSE	FALSE	FALSE	FALSE	FALSE
magnesio-hastingsitic hornblende	FALSE	FALSE	FALSE	FALSE	FALSE	FALSE	FALSE	FALSE	FALSE	FALSE	FALSE	FALSE	FALSE	FALSE	FALSE	FALSE	FALSE	FALSE	FALSE	FALSE	FALSE	FALSE	FALSE	FALSE	FALSE	FALSE	FALSE	FALSE	FALSE	FALSE	FALSE	FALSE	FALSE	FALSE	FALSE	FALSE	FALSE	FALSE	FALSE	FALSE	FALSE	FALSE	FALSE	FALSE	FALSE	FALSE	FALSE	FALSE	FALSE
magnesian hastingsitic hornblende	FALSE	FALSE	FALSE	FALSE	FALSE	FALSE	FALSE	FALSE	FALSE	FALSE	FALSE	FALSE	FALSE	FALSE	FALSE	FALSE	FALSE	FALSE	FALSE	FALSE	FALSE	FALSE	FALSE	FALSE	FALSE	FALSE	FALSE	FALSE	FALSE	FALSE	FALSE	FALSE	FALSE	FALSE	FALSE	FALSE	FALSE	FALSE	FALSE	FALSE	FALSE	FALSE	FALSE	FALSE	FALSE	FALSE	FALSE	FALSE	FALSE
hastingsitic hornblende	FALSE	FALSE	FALSE	FALSE	FALSE	FALSE	FALSE	FALSE	FALSE	FALSE	FALSE	FALSE	FALSE	FALSE	FALSE	FALSE	FALSE	FALSE	FALSE	FALSE	FALSE	FALSE	FALSE	FALSE	FALSE	FALSE	FALSE	FALSE	FALSE	FALSE	FALSE	FALSE	FALSE	FALSE	FALSE	FALSE	FALSE	FALSE	FALSE	FALSE	FALSE	FALSE	FALSE	FALSE	FALSE	FALSE	FALSE	FALSE	FALSE
magnesio-hastingsite	FALSE	FALSE	FALSE	FALSE	FALSE	FALSE	FALSE	FALSE	FALSE	FALSE	FALSE	FALSE	FALSE	FALSE	FALSE	FALSE	FALSE	FALSE	FALSE	FALSE	FALSE	FALSE	FALSE	FALSE	FALSE	FALSE	FALSE	FALSE	FALSE	FALSE	FALSE	FALSE	FALSE	FALSE	FALSE	FALSE	FALSE	FALSE	FALSE	FALSE	FALSE	FALSE	FALSE	FALSE	FALSE	FALSE	FALSE	FALSE	FALSE
magnesian hastingsite	FALSE	FALSE	FALSE	FALSE	FALSE	FALSE	FALSE	FALSE	FALSE	FALSE	FALSE	FALSE	FALSE	FALSE	FALSE	FALSE	FALSE	FALSE	FALSE	FALSE	FALSE	FALSE	FALSE	FALSE	FALSE	FALSE	FALSE	FALSE	FALSE	FALSE	FALSE	FALSE	FALSE	FALSE	FALSE	FALSE	FALSE	FALSE	FALSE	FALSE	FALSE	FALSE	FALSE	FALSE	FALSE	FALSE	FALSE	FALSE	FALSE
hastingsite	FALSE	FALSE	FALSE	FALSE	FALSE	FALSE	FALSE	FALSE	FALSE	FALSE	FALSE	FALSE	FALSE	FALSE	FALSE	FALSE	FALSE	FALSE	FALSE	FALSE	FALSE	FALSE	FALSE	FALSE	FALSE	FALSE	FALSE	FALSE	FALSE	FALSE	FALSE	FALSE	FALSE	FALSE	FALSE	FALSE	FALSE	FALSE	FALSE	FALSE	FALSE	FALSE	FALSE	FALSE	FALSE	FALSE	FALSE	FALSE	FALSE
subsilicic magnesio-hastingsite	FALSE	FALSE	FALSE	FALSE	FALSE	FALSE	FALSE	FALSE	FALSE	FALSE	FALSE	FALSE	FALSE	FALSE	FALSE	FALSE	FALSE	FALSE	FALSE	FALSE	FALSE	FALSE	FALSE	FALSE	FALSE	FALSE	FALSE	FALSE	FALSE	FALSE	FALSE	FALSE	FALSE	FALSE	FALSE	FALSE	FALSE	FALSE	FALSE	FALSE	FALSE	FALSE	FALSE	FALSE	FALSE	FALSE	FALSE	FALSE	FALSE
subsilicic magnesian hastingsite	FALSE	FALSE	FALSE	FALSE	FALSE	FALSE	FALSE	FALSE	FALSE	FALSE	FALSE	FALSE	FALSE	FALSE	FALSE	FALSE	FALSE	FALSE	FALSE	FALSE	FALSE	FALSE	FALSE	FALSE	FALSE	FALSE	FALSE	FALSE	FALSE	FALSE	FALSE	FALSE	FALSE	FALSE	FALSE	FALSE	FALSE	FALSE	FALSE	FALSE	FALSE	FALSE	FALSE	FALSE	FALSE	FALSE	FALSE	FALSE	FALSE
subsilicic hastingsite	FALSE	FALSE	FALSE	FALSE	FALSE	FALSE	FALSE	FALSE	FALSE	FALSE	FALSE	FALSE	FALSE	FALSE	FALSE	FALSE	FALSE	FALSE	FALSE	FALSE	FALSE	FALSE	FALSE	FALSE	FALSE	FALSE	FALSE	FALSE	FALSE	FALSE	FALSE	FALSE	FALSE	FALSE	FALSE	FALSE	FALSE	FALSE	FALSE	FALSE	FALSE	FALSE	FALSE	FALSE	FALSE	FALSE	FALSE	FALSE	FALSE
kaersutite	FALSE	FALSE	FALSE	FALSE	FALSE	FALSE	FALSE	FALSE	FALSE	FALSE	FALSE	FALSE	FALSE	FALSE	FALSE	FALSE	FALSE	FALSE	FALSE	FALSE	FALSE	FALSE	FALSE	FALSE	FALSE	FALSE	FALSE	FALSE	FALSE	FALSE	FALSE	FALSE	FALSE	FALSE	FALSE	FALSE	FALSE	FALSE	FALSE	FALSE	FALSE	FALSE	FALSE	FALSE	FALSE	FALSE	FALSE	FALSE	FALSE
ferro-kaersutite	FALSE	FALSE	FALSE	FALSE	FALSE	FALSE	FALSE	FALSE	FALSE	FALSE	FALSE	FALSE	FALSE	FALSE	FALSE	FALSE	FALSE	FALSE	FALSE	FALSE	FALSE	FALSE	FALSE	FALSE	FALSE	FALSE	FALSE	FALSE	FALSE	FALSE	FALSE	FALSE	FALSE	FALSE	FALSE	FALSE	FALSE	FALSE	FALSE	FALSE	FALSE	FALSE	FALSE	FALSE	FALSE	FALSE	FALSE	FALSE	FALSE
subsilicic kaersutite	FALSE	FALSE	FALSE	FALSE	FALSE	FALSE	FALSE	FALSE	FALSE	FALSE	FALSE	FALSE	FALSE	FALSE	FALSE	FALSE	FALSE	FALSE	FALSE	FALSE	FALSE	FALSE	FALSE	FALSE	FALSE	FALSE	FALSE	FALSE	FALSE	FALSE	FALSE	FALSE	FALSE	FALSE	FALSE	FALSE	FALSE	FALSE	FALSE	FALSE	FALSE	FALSE	FALSE	FALSE	FALSE	FALSE	FALSE	FALSE	FALSE
subsilicic ferro-kaersutite	FALSE	FALSE	FALSE	FALSE	FALSE	FALSE	FALSE	FALSE	FALSE	FALSE	FALSE	FALSE	FALSE	FALSE	FALSE	FALSE	FALSE	FALSE	FALSE	FALSE	FALSE	FALSE	FALSE	FALSE	FALSE	FALSE	FALSE	FALSE	FALSE	FALSE	FALSE	FALSE	FALSE	FALSE	FALSE	FALSE	FALSE	FALSE	FALSE	FALSE	FALSE	FALSE	FALSE	FALSE	FALSE	FALSE	FALSE	FALSE	FALSE
magnesio-anthophyllite	magnesio-anthophyllite	FALSE	FALSE	FALSE	FALSE	magnesio-anthophyllite	magnesio-anthophyllite	magnesio-anthophyllite	magnesio-anthophyllite	magnesio-anthophyllite	magnesio-anthophyllite	magnesio-anthophyllite	magnesio-anthophyllite	magnesio-anthophyllite	magnesio-anthophyllite	magnesio-anthophyllite	magnesio-anthophyllite	magnesio-anthophyllite	magnesio-anthophyllite	magnesio-anthophyllite	magnesio-anthophyllite	magnesio-anthophyllite	magnesio-anthophyllite	magnesio-anthophyllite	magnesio-anthophyllite	magnesio-anthophyllite	magnesio-anthophyllite	magnesio-anthophyllite	magnesio-anthophyllite	magnesio-anthophyllite	magnesio-anthophyllite	magnesio-anthophyllite	magnesio-anthophyllite	magnesio-anthophyllite	magnesio-anthophyllite	magnesio-anthophyllite	magnesio-anthophyllite	magnesio-anthophyllite	magnesio-anthophyllite	magnesio-anthophyllite	magnesio-anthophyllite	magnesio-anthophyllite	magnesio-anthophyllite	magnesio-anthophyllite	magnesio-anthophyllite	magnesio-anthophyllite	magnesio-anthophyllite	magnesio-anthophyllite	magnesio-anthophyllite
anthophyllite	FALSE	anthophyllite	FALSE	anthophyllite	anthophyllite	FALSE	FALSE	FALSE	FALSE	FALSE	FALSE	FALSE	FALSE	FALSE	FALSE	FALSE	FALSE	FALSE	FALSE	FALSE	FALSE	FALSE	FALSE	FALSE	FALSE	FALSE	FALSE	FALSE	FALSE	FALSE	FALSE	FALSE	FALSE	FALSE	FALSE	FALSE	FALSE	FALSE	FALSE	FALSE	FALSE	FALSE	FALSE	FALSE	FALSE	FALSE	FALSE	FALSE	FALSE
ferro-anthophyllite	FALSE	FALSE	FALSE	FALSE	FALSE	FALSE	FALSE	FALSE	FALSE	FALSE	FALSE	FALSE	FALSE	FALSE	FALSE	FALSE	FALSE	FALSE	FALSE	FALSE	FALSE	FALSE	FALSE	FALSE	FALSE	FALSE	FALSE	FALSE	FALSE	FALSE	FALSE	FALSE	FALSE	FALSE	FALSE	FALSE	FALSE	FALSE	FALSE	FALSE	FALSE	FALSE	FALSE	FALSE	FALSE	FALSE	FALSE	FALSE	FALSE
magnesio-gedrite	FALSE	FALSE	magnesio-gedrite	FALSE	FALSE	FALSE	FALSE	FALSE	FALSE	FALSE	FALSE	FALSE	FALSE	FALSE	FALSE	FALSE	FALSE	FALSE	FALSE	FALSE	FALSE	FALSE	FALSE	FALSE	FALSE	FALSE	FALSE	FALSE	FALSE	FALSE	FALSE	FALSE	FALSE	FALSE	FALSE	FALSE	FALSE	FALSE	FALSE	FALSE	FALSE	FALSE	FALSE	FALSE	FALSE	FALSE	FALSE	FALSE	FALSE
gedrite	FALSE	FALSE	FALSE	FALSE	FALSE	FALSE	FALSE	FALSE	FALSE	FALSE	FALSE	FALSE	FALSE	FALSE	FALSE	FALSE	FALSE	FALSE	FALSE	FALSE	FALSE	FALSE	FALSE	FALSE	FALSE	FALSE	FALSE	FALSE	FALSE	FALSE	FALSE	FALSE	FALSE	FALSE	FALSE	FALSE	FALSE	FALSE	FALSE	FALSE	FALSE	FALSE	FALSE	FALSE	FALSE	FALSE	FALSE	FALSE	FALSE
ferro-gedrite	FALSE	FALSE	FALSE	FALSE	FALSE	FALSE	FALSE	FALSE	FALSE	FALSE	FALSE	FALSE	FALSE	FALSE	FALSE	FALSE	FALSE	FALSE	FALSE	FALSE	FALSE	FALSE	FALSE	FALSE	FALSE	FALSE	FALSE	FALSE	FALSE	FALSE	FALSE	FALSE	FALSE	FALSE	FALSE	FALSE	FALSE	FALSE	FALSE	FALSE	FALSE	FALSE	FALSE	FALSE	FALSE	FALSE	FALSE	FALSE	FALSE
magnesio-cummingtonite	magnesio-cummingtonite	FALSE	magnesio-cummingtonite	FALSE	FALSE	magnesio-cummingtonite	magnesio-cummingtonite	magnesio-cummingtonite	magnesio-cummingtonite	magnesio-cummingtonite	magnesio-cummingtonite	magnesio-cummingtonite	magnesio-cummingtonite	magnesio-cummingtonite	magnesio-cummingtonite	magnesio-cummingtonite	magnesio-cummingtonite	magnesio-cummingtonite	magnesio-cummingtonite	magnesio-cummingtonite	magnesio-cummingtonite	magnesio-cummingtonite	magnesio-cummingtonite	magnesio-cummingtonite	magnesio-cummingtonite	magnesio-cummingtonite	magnesio-cummingtonite	magnesio-cummingtonite	magnesio-cummingtonite	magnesio-cummingtonite	magnesio-cummingtonite	magnesio-cummingtonite	magnesio-cummingtonite	magnesio-cummingtonite	magnesio-cummingtonite	magnesio-cummingtonite	magnesio-cummingtonite	magnesio-cummingtonite	magnesio-cummingtonite	magnesio-cummingtonite	magnesio-cummingtonite	magnesio-cummingtonite	magnesio-cummingtonite	magnesio-cummingtonite	magnesio-cummingtonite	magnesio-cummingtonite	magnesio-cummingtonite	magnesio-cummingtonite	magnesio-cummingtonite
cummingtonite	FALSE	cummingtonite	FALSE	FALSE	FALSE	FALSE	FALSE	FALSE	FALSE	FALSE	FALSE	FALSE	FALSE	FALSE	FALSE	FALSE	FALSE	FALSE	FALSE	FALSE	FALSE	FALSE	FALSE	FALSE	FALSE	FALSE	FALSE	FALSE	FALSE	FALSE	FALSE	FALSE	FALSE	FALSE	FALSE	FALSE	FALSE	FALSE	FALSE	FALSE	FALSE	FALSE	FALSE	FALSE	FALSE	FALSE	FALSE	FALSE	FALSE
grunerite	FALSE	FALSE	FALSE	FALSE	FALSE	FALSE	FALSE	FALSE	FALSE	FALSE	FALSE	FALSE	FALSE	FALSE	FALSE	FALSE	FALSE	FALSE	FALSE	FALSE	FALSE	FALSE	FALSE	FALSE	FALSE	FALSE	FALSE	FALSE	FALSE	FALSE	FALSE	FALSE	FALSE	FALSE	FALSE	FALSE	FALSE	FALSE	FALSE	FALSE	FALSE	FALSE	FALSE	FALSE	FALSE	FALSE	FALSE	FALSE	FALSE
dannemoreite	FALSE	FALSE	FALSE	dannemoreite	FALSE	FALSE	FALSE	FALSE	FALSE	FALSE	FALSE	FALSE	FALSE	FALSE	FALSE	FALSE	FALSE	FALSE	FALSE	FALSE	FALSE	FALSE	FALSE	FALSE	FALSE	FALSE	FALSE	FALSE	FALSE	FALSE	FALSE	FALSE	FALSE	FALSE	FALSE	FALSE	FALSE	FALSE	FALSE	FALSE	FALSE	FALSE	FALSE	FALSE	FALSE	FALSE	FALSE	FALSE	FALSE
tirodite	FALSE	FALSE	FALSE	FALSE	tirodite	FALSE	FALSE	FALSE	FALSE	FALSE	FALSE	FALSE	FALSE	FALSE	FALSE	FALSE	FALSE	FALSE	FALSE	FALSE	FALSE	FALSE	FALSE	FALSE	FALSE	FALSE	FALSE	FALSE	FALSE	FALSE	FALSE	FALSE	FALSE	FALSE	FALSE	FALSE	FALSE	FALSE	FALSE	FALSE	FALSE	FALSE	FALSE	FALSE	FALSE	FALSE	FALSE	FALSE	FALSE
winchite	winchite	winchite	FALSE	FALSE	winchite	winchite	FALSE	FALSE	winchite	FALSE	FALSE	FALSE	FALSE	FALSE	FALSE	winchite	winchite	FALSE	winchite	winchite	FALSE	FALSE	FALSE	FALSE	FALSE	FALSE	FALSE	winchite	FALSE	FALSE	FALSE	FALSE	winchite	FALSE	FALSE	FALSE	FALSE	FALSE	FALSE	FALSE	FALSE	FALSE	FALSE	FALSE	FALSE	FALSE	FALSE	FALSE	FALSE
ferro-winchite	FALSE	FALSE	FALSE	ferro-winchite	FALSE	FALSE	FALSE	FALSE	FALSE	FALSE	FALSE	FALSE	FALSE	FALSE	FALSE	FALSE	FALSE	FALSE	FALSE	FALSE	FALSE	FALSE	FALSE	FALSE	FALSE	FALSE	FALSE	FALSE	FALSE	FALSE	FALSE	FALSE	FALSE	FALSE	FALSE	FALSE	FALSE	FALSE	FALSE	FALSE	FALSE	FALSE	FALSE	FALSE	FALSE	FALSE	FALSE	FALSE	FALSE
barroisite	FALSE	FALSE	barroisite	FALSE	FALSE	FALSE	barroisite	barroisite	FALSE	barroisite	barroisite	barroisite	barroisite	barroisite	barroisite	FALSE	FALSE	barroisite	FALSE	FALSE	barroisite	barroisite	barroisite	barroisite	barroisite	barroisite	barroisite	FALSE	barroisite	barroisite	barroisite	barroisite	FALSE	barroisite	barroisite	barroisite	barroisite	barroisite	barroisite	barroisite	barroisite	barroisite	barroisite	barroisite	barroisite	barroisite	barroisite	barroisite	barroisite
ferro-barroisite	FALSE	FALSE	FALSE	FALSE	FALSE	FALSE	FALSE	FALSE	FALSE	FALSE	FALSE	FALSE	FALSE	FALSE	FALSE	FALSE	FALSE	FALSE	FALSE	FALSE	FALSE	FALSE	FALSE	FALSE	FALSE	FALSE	FALSE	FALSE	FALSE	FALSE	FALSE	FALSE	FALSE	FALSE	FALSE	FALSE	FALSE	FALSE	FALSE	FALSE	FALSE	FALSE	FALSE	FALSE	FALSE	FALSE	FALSE	FALSE	FALSE
richterite	richterite	richterite	FALSE	FALSE	richterite	richterite	FALSE	FALSE	richterite	FALSE	FALSE	FALSE	FALSE	FALSE	FALSE	richterite	richterite	FALSE	richterite	richterite	FALSE	FALSE	FALSE	FALSE	FALSE	FALSE	FALSE	richterite	FALSE	FALSE	FALSE	FALSE	richterite	FALSE	FALSE	FALSE	FALSE	FALSE	FALSE	FALSE	FALSE	FALSE	FALSE	FALSE	FALSE	FALSE	FALSE	FALSE	FALSE
ferro-richterite	FALSE	FALSE	FALSE	ferro-richterite	FALSE	FALSE	FALSE	FALSE	FALSE	FALSE	FALSE	FALSE	FALSE	FALSE	FALSE	FALSE	FALSE	FALSE	FALSE	FALSE	FALSE	FALSE	FALSE	FALSE	FALSE	FALSE	FALSE	FALSE	FALSE	FALSE	FALSE	FALSE	FALSE	FALSE	FALSE	FALSE	FALSE	FALSE	FALSE	FALSE	FALSE	FALSE	FALSE	FALSE	FALSE	FALSE	FALSE	FALSE	FALSE
magnesio-kataphorite	FALSE	FALSE	magnesio-kataphorite	FALSE	FALSE	FALSE	magnesio-kataphorite	magnesio-kataphorite	FALSE	magnesio-kataphorite	magnesio-kataphorite	magnesio-kataphorite	magnesio-kataphorite	magnesio-kataphorite	magnesio-kataphorite	FALSE	FALSE	magnesio-kataphorite	FALSE	FALSE	magnesio-kataphorite	magnesio-kataphorite	magnesio-kataphorite	magnesio-kataphorite	magnesio-kataphorite	magnesio-kataphorite	magnesio-kataphorite	FALSE	magnesio-kataphorite	magnesio-kataphorite	magnesio-kataphorite	magnesio-kataphorite	FALSE	magnesio-kataphorite	magnesio-kataphorite	magnesio-kataphorite	magnesio-kataphorite	magnesio-kataphorite	magnesio-kataphorite	magnesio-kataphorite	magnesio-kataphorite	magnesio-kataphorite	magnesio-kataphorite	magnesio-kataphorite	magnesio-kataphorite	magnesio-kataphorite	magnesio-kataphorite	magnesio-kataphorite	magnesio-kataphorite
katophorite	FALSE	FALSE	FALSE	FALSE	FALSE	FALSE	FALSE	FALSE	FALSE	FALSE	FALSE	FALSE	FALSE	FALSE	FALSE	FALSE	FALSE	FALSE	FALSE	FALSE	FALSE	FALSE	FALSE	FALSE	FALSE	FALSE	FALSE	FALSE	FALSE	FALSE	FALSE	FALSE	FALSE	FALSE	FALSE	FALSE	FALSE	FALSE	FALSE	FALSE	FALSE	FALSE	FALSE	FALSE	FALSE	FALSE	FALSE	FALSE	FALSE
magnesio-taramite	FALSE	FALSE	FALSE	FALSE	FALSE	FALSE	FALSE	FALSE	FALSE	FALSE	FALSE	FALSE	FALSE	FALSE	FALSE	FALSE	FALSE	FALSE	FALSE	FALSE	FALSE	FALSE	FALSE	FALSE	FALSE	FALSE	FALSE	FALSE	FALSE	FALSE	FALSE	FALSE	FALSE	FALSE	FALSE	FALSE	FALSE	FALSE	FALSE	FALSE	FALSE	FALSE	FALSE	FALSE	FALSE	FALSE	FALSE	FALSE	FALSE
taramite	FALSE	FALSE	FALSE	FALSE	FALSE	FALSE	FALSE	FALSE	FALSE	FALSE	FALSE	FALSE	FALSE	FALSE	FALSE	FALSE	FALSE	FALSE	FALSE	FALSE	FALSE	FALSE	FALSE	FALSE	FALSE	FALSE	FALSE	FALSE	FALSE	FALSE	FALSE	FALSE	FALSE	FALSE	FALSE	FALSE	FALSE	FALSE	FALSE	FALSE	FALSE	FALSE	FALSE	FALSE	FALSE	FALSE	FALSE	FALSE	FALSE
ferro-eckermannite	FALSE	FALSE	FALSE	FALSE	FALSE	FALSE	FALSE	FALSE	FALSE	FALSE	FALSE	FALSE	FALSE	FALSE	FALSE	FALSE	FALSE	FALSE	FALSE	FALSE	FALSE	FALSE	FALSE	FALSE	FALSE	FALSE	FALSE	FALSE	FALSE	FALSE	FALSE	FALSE	FALSE	FALSE	FALSE	FALSE	FALSE	FALSE	FALSE	FALSE	FALSE	FALSE	FALSE	FALSE	FALSE	FALSE	FALSE	FALSE	FALSE
eckermannite	eckermannite	eckermannite	eckermannite	FALSE	eckermannite	FALSE	FALSE	FALSE	eckermannite	FALSE	FALSE	FALSE	FALSE	FALSE	FALSE	FALSE	FALSE	FALSE	eckermannite	FALSE	FALSE	FALSE	FALSE	FALSE	FALSE	FALSE	FALSE	eckermannite	FALSE	FALSE	FALSE	FALSE	FALSE	FALSE	FALSE	FALSE	FALSE	FALSE	FALSE	FALSE	FALSE	FALSE	FALSE	FALSE	FALSE	FALSE	FALSE	FALSE	FALSE
arfvedsonite	FALSE	FALSE	FALSE	arfvedsonite	FALSE	FALSE	FALSE	FALSE	FALSE	FALSE	FALSE	FALSE	FALSE	FALSE	FALSE	FALSE	FALSE	FALSE	FALSE	FALSE	FALSE	FALSE	FALSE	FALSE	FALSE	FALSE	FALSE	FALSE	FALSE	FALSE	FALSE	FALSE	FALSE	FALSE	FALSE	FALSE	FALSE	FALSE	FALSE	FALSE	FALSE	FALSE	FALSE	FALSE	FALSE	FALSE	FALSE	FALSE	FALSE
kozulite	FALSE	FALSE	FALSE	FALSE	FALSE	FALSE	FALSE	FALSE	FALSE	FALSE	FALSE	FALSE	FALSE	FALSE	FALSE	FALSE	FALSE	FALSE	FALSE	FALSE	FALSE	FALSE	FALSE	FALSE	FALSE	FALSE	FALSE	FALSE	FALSE	FALSE	FALSE	FALSE	FALSE	FALSE	FALSE	FALSE	FALSE	FALSE	FALSE	FALSE	FALSE	FALSE	FALSE	FALSE	FALSE	FALSE	FALSE	FALSE	FALSE
magnesio-arfvedsonite	FALSE	FALSE	FALSE	FALSE	FALSE	magnesio-arfvedsonite	magnesio-arfvedsonite	magnesio-arfvedsonite	FALSE	magnesio-arfvedsonite	magnesio-arfvedsonite	magnesio-arfvedsonite	magnesio-arfvedsonite	magnesio-arfvedsonite	magnesio-arfvedsonite	magnesio-arfvedsonite	magnesio-arfvedsonite	magnesio-arfvedsonite	FALSE	magnesio-arfvedsonite	magnesio-arfvedsonite	magnesio-arfvedsonite	magnesio-arfvedsonite	magnesio-arfvedsonite	magnesio-arfvedsonite	magnesio-arfvedsonite	magnesio-arfvedsonite	FALSE	magnesio-arfvedsonite	magnesio-arfvedsonite	magnesio-arfvedsonite	magnesio-arfvedsonite	magnesio-arfvedsonite	magnesio-arfvedsonite	magnesio-arfvedsonite	magnesio-arfvedsonite	magnesio-arfvedsonite	magnesio-arfvedsonite	magnesio-arfvedsonite	magnesio-arfvedsonite	magnesio-arfvedsonite	magnesio-arfvedsonite	magnesio-arfvedsonite	magnesio-arfvedsonite	magnesio-arfvedsonite	magnesio-arfvedsonite	magnesio-arfvedsonite	magnesio-arfvedsonite	magnesio-arfvedsonite
ferro-glaucophane	FALSE	FALSE	FALSE	FALSE	FALSE	FALSE	FALSE	FALSE	FALSE	FALSE	FALSE	FALSE	FALSE	FALSE	FALSE	FALSE	FALSE	FALSE	FALSE	FALSE	FALSE	FALSE	FALSE	FALSE	FALSE	FALSE	FALSE	FALSE	FALSE	FALSE	FALSE	FALSE	FALSE	FALSE	FALSE	FALSE	FALSE	FALSE	FALSE	FALSE	FALSE	FALSE	FALSE	FALSE	FALSE	FALSE	FALSE	FALSE	FALSE
glaucophane	glaucophane	glaucophane	glaucophane	FALSE	glaucophane	FALSE	FALSE	FALSE	glaucophane	FALSE	FALSE	FALSE	FALSE	FALSE	FALSE	FALSE	FALSE	FALSE	glaucophane	FALSE	FALSE	FALSE	FALSE	FALSE	FALSE	FALSE	FALSE	glaucophane	FALSE	FALSE	FALSE	FALSE	FALSE	FALSE	FALSE	FALSE	FALSE	FALSE	FALSE	FALSE	FALSE	FALSE	FALSE	FALSE	FALSE	FALSE	FALSE	FALSE	FALSE
crossite	FALSE	FALSE	FALSE	FALSE	FALSE	FALSE	FALSE	FALSE	FALSE	FALSE	FALSE	FALSE	FALSE	FALSE	FALSE	FALSE	FALSE	FALSE	FALSE	FALSE	FALSE	FALSE	FALSE	FALSE	FALSE	FALSE	FALSE	FALSE	FALSE	FALSE	FALSE	FALSE	FALSE	FALSE	FALSE	FALSE	FALSE	FALSE	FALSE	FALSE	FALSE	FALSE	FALSE	FALSE	FALSE	FALSE	FALSE	FALSE	FALSE
riebeckite	FALSE	FALSE	FALSE	riebeckite	FALSE	FALSE	FALSE	FALSE	FALSE	FALSE	FALSE	FALSE	FALSE	FALSE	FALSE	FALSE	FALSE	FALSE	FALSE	FALSE	FALSE	FALSE	FALSE	FALSE	FALSE	FALSE	FALSE	FALSE	FALSE	FALSE	FALSE	FALSE	FALSE	FALSE	FALSE	FALSE	FALSE	FALSE	FALSE	FALSE	FALSE	FALSE	FALSE	FALSE	FALSE	FALSE	FALSE	FALSE	FALSE
magnesio-riebeckite	FALSE	FALSE	FALSE	FALSE	FALSE	magnesio-riebeckite	magnesio-riebeckite	magnesio-riebeckite	FALSE	magnesio-riebeckite	magnesio-riebeckite	magnesio-riebeckite	magnesio-riebeckite	magnesio-riebeckite	magnesio-riebeckite	magnesio-riebeckite	magnesio-riebeckite	magnesio-riebeckite	FALSE	magnesio-riebeckite	magnesio-riebeckite	magnesio-riebeckite	magnesio-riebeckite	magnesio-riebeckite	magnesio-riebeckite	magnesio-riebeckite	magnesio-riebeckite	FALSE	magnesio-riebeckite	magnesio-riebeckite	magnesio-riebeckite	magnesio-riebeckite	magnesio-riebeckite	magnesio-riebeckite	magnesio-riebeckite	magnesio-riebeckite	magnesio-riebeckite	magnesio-riebeckite	magnesio-riebeckite	magnesio-riebeckite	magnesio-riebeckite	magnesio-riebeckite	magnesio-riebeckite	magnesio-riebeckite	magnesio-riebeckite	magnesio-riebeckite	magnesio-riebeckite	magnesio-riebeckite	magnesio-riebeckite
ferro-nyboite	FALSE	FALSE	FALSE	FALSE	FALSE	FALSE	FALSE	FALSE	FALSE	FALSE	FALSE	FALSE	FALSE	FALSE	FALSE	FALSE	FALSE	FALSE	FALSE	FALSE	FALSE	FALSE	FALSE	FALSE	FALSE	FALSE	FALSE	FALSE	FALSE	FALSE	FALSE	FALSE	FALSE	FALSE	FALSE	FALSE	FALSE	FALSE	FALSE	FALSE	FALSE	FALSE	FALSE	FALSE	FALSE	FALSE	FALSE	FALSE	FALSE
nyboite	nyboite	nyboite	nyboite	FALSE	nyboite	FALSE	FALSE	FALSE	nyboite	FALSE	FALSE	FALSE	FALSE	FALSE	FALSE	FALSE	FALSE	FALSE	nyboite	FALSE	FALSE	FALSE	FALSE	FALSE	FALSE	FALSE	FALSE	nyboite	FALSE	FALSE	FALSE	FALSE	FALSE	FALSE	FALSE	FALSE	FALSE	FALSE	FALSE	FALSE	FALSE	FALSE	FALSE	FALSE	FALSE	FALSE	FALSE	FALSE	FALSE
ferro-anophorite	FALSE	FALSE	FALSE	ferro-anophorite	FALSE	FALSE	FALSE	FALSE	FALSE	FALSE	FALSE	FALSE	FALSE	FALSE	FALSE	FALSE	FALSE	FALSE	FALSE	FALSE	FALSE	FALSE	FALSE	FALSE	FALSE	FALSE	FALSE	FALSE	FALSE	FALSE	FALSE	FALSE	FALSE	FALSE	FALSE	FALSE	FALSE	FALSE	FALSE	FALSE	FALSE	FALSE	FALSE	FALSE	FALSE	FALSE	FALSE	FALSE	FALSE
anophorite	FALSE	FALSE	FALSE	FALSE	FALSE	anophorite	anophorite	anophorite	FALSE	anophorite	anophorite	anophorite	anophorite	anophorite	anophorite	anophorite	anophorite	anophorite	FALSE	anophorite	anophorite	anophorite	anophorite	anophorite	anophorite	anophorite	anophorite	FALSE	anophorite	anophorite	anophorite	anophorite	anophorite	anophorite	anophorite	anophorite	anophorite	anophorite	anophorite	anophorite	anophorite	anophorite	anophorite	anophorite	anophorite	anophorite	anophorite	anophorite	anophorite
Part 11. Find correct amphibole group
Ca amphibole ?	FALSE	FALSE	FALSE	FALSE	FALSE	Ca	Ca	Ca	FALSE	Ca	FALSE	Ca	Ca	Ca	Ca	FALSE	Ca	Ca	Ca	Ca	FALSE	FALSE	Ca	Ca	Ca	Ca	Ca	Ca	FALSE	Ca	Ca	Ca	Ca	Ca	Ca	Ca	Ca	Ca	Ca	Ca	Ca	Ca	Ca	Ca	Ca	FALSE	Ca	Ca	Ca
Fe-Mg-Mn amph ?	Fe-Mg-Mn	Fe-Mg-Mn	Fe-Mg-Mn	Fe-Mg-Mn	Fe-Mg-Mn	FALSE	FALSE	FALSE	FALSE	FALSE	FALSE	FALSE	FALSE	FALSE	FALSE	FALSE	FALSE	FALSE	FALSE	FALSE	FALSE	FALSE	FALSE	FALSE	FALSE	FALSE	FALSE	FALSE	FALSE	FALSE	FALSE	FALSE	FALSE	FALSE	FALSE	FALSE	FALSE	FALSE	FALSE	FALSE	FALSE	FALSE	FALSE	FALSE	FALSE	FALSE	FALSE	FALSE	FALSE
Na-Ca amph ?	FALSE	FALSE	FALSE	FALSE	FALSE	FALSE	FALSE	FALSE	Na-Ca	FALSE	Na-Ca	FALSE	FALSE	FALSE	FALSE	Na-Ca	FALSE	FALSE	FALSE	FALSE	Na-Ca	Na-Ca	FALSE	FALSE	FALSE	FALSE	FALSE	FALSE	Na-Ca	FALSE	FALSE	FALSE	FALSE	FALSE	FALSE	FALSE	FALSE	FALSE	FALSE	FALSE	FALSE	FALSE	FALSE	FALSE	FALSE	Na-Ca	FALSE	FALSE	FALSE
Alkali amph ?	FALSE	FALSE	FALSE	FALSE	FALSE	FALSE	FALSE	FALSE	FALSE	FALSE	FALSE	FALSE	FALSE	FALSE	FALSE	FALSE	FALSE	FALSE	FALSE	FALSE	FALSE	FALSE	FALSE	FALSE	FALSE	FALSE	FALSE	FALSE	FALSE	FALSE	FALSE	FALSE	FALSE	FALSE	FALSE	FALSE	FALSE	FALSE	FALSE	FALSE	FALSE	FALSE	FALSE	FALSE	FALSE	FALSE	FALSE	FALSE	FALSE
Which amph group ?	Fe-Mg-Mn	Fe-Mg-Mn	Fe-Mg-Mn	Fe-Mg-Mn	Fe-Mg-Mn	Ca	Ca	Ca	Na-Ca	Ca	Na-Ca	Ca	Ca	Ca	Ca	Na-Ca	Ca	Ca	Ca	Ca	Na-Ca	Na-Ca	Ca	Ca	Ca	Ca	Ca	Ca	Na-Ca	Ca	Ca	Ca	Ca	Ca	Ca	Ca	Ca	Ca	Ca	Ca	Ca	Ca	Ca	Ca	Ca	Na-Ca	Ca	Ca	Ca
Part 12. Select TRUE name on each diagram
Ca diagram 1	tremoliteЛОЖЬЛОЖЬЛОЖЬЛОЖЬЛОЖЬЛОЖЬЛОЖЬЛОЖЬЛОЖЬЛОЖЬЛОЖЬЛОЖЬЛОЖЬ	ЛОЖЬactinoliteЛОЖЬЛОЖЬЛОЖЬЛОЖЬЛОЖЬЛОЖЬЛОЖЬЛОЖЬЛОЖЬЛОЖЬЛОЖЬЛОЖЬ	ЛОЖЬЛОЖЬЛОЖЬЛОЖЬЛОЖЬЛОЖЬmagnesio-hornblendeЛОЖЬЛОЖЬЛОЖЬЛОЖЬЛОЖЬЛОЖЬЛОЖЬ	ЛОЖЬЛОЖЬferro-actinoliteЛОЖЬЛОЖЬЛОЖЬЛОЖЬЛОЖЬЛОЖЬЛОЖЬЛОЖЬЛОЖЬЛОЖЬЛОЖЬ	ЛОЖЬactinoliteЛОЖЬЛОЖЬЛОЖЬЛОЖЬЛОЖЬЛОЖЬЛОЖЬЛОЖЬЛОЖЬЛОЖЬЛОЖЬЛОЖЬ	tremoliteЛОЖЬЛОЖЬЛОЖЬЛОЖЬЛОЖЬЛОЖЬЛОЖЬЛОЖЬЛОЖЬЛОЖЬЛОЖЬЛОЖЬЛОЖЬ	ЛОЖЬЛОЖЬЛОЖЬtremolitic hornblendeЛОЖЬЛОЖЬЛОЖЬЛОЖЬЛОЖЬЛОЖЬЛОЖЬЛОЖЬЛОЖЬЛОЖЬ	ЛОЖЬЛОЖЬЛОЖЬtremolitic hornblendeЛОЖЬЛОЖЬЛОЖЬЛОЖЬЛОЖЬЛОЖЬЛОЖЬЛОЖЬЛОЖЬЛОЖЬ	tremoliteЛОЖЬЛОЖЬЛОЖЬЛОЖЬЛОЖЬЛОЖЬЛОЖЬЛОЖЬЛОЖЬЛОЖЬЛОЖЬЛОЖЬЛОЖЬ	ЛОЖЬЛОЖЬЛОЖЬtremolitic hornblendeЛОЖЬЛОЖЬЛОЖЬЛОЖЬЛОЖЬЛОЖЬЛОЖЬЛОЖЬЛОЖЬЛОЖЬ	ЛОЖЬЛОЖЬЛОЖЬtremolitic hornblendeЛОЖЬЛОЖЬЛОЖЬЛОЖЬЛОЖЬЛОЖЬЛОЖЬЛОЖЬЛОЖЬЛОЖЬ	ЛОЖЬЛОЖЬЛОЖЬtremolitic hornblendeЛОЖЬЛОЖЬЛОЖЬЛОЖЬЛОЖЬЛОЖЬЛОЖЬЛОЖЬЛОЖЬЛОЖЬ	ЛОЖЬЛОЖЬЛОЖЬtremolitic hornblendeЛОЖЬЛОЖЬЛОЖЬЛОЖЬЛОЖЬЛОЖЬЛОЖЬЛОЖЬЛОЖЬЛОЖЬ	ЛОЖЬЛОЖЬЛОЖЬtremolitic hornblendeЛОЖЬЛОЖЬЛОЖЬЛОЖЬЛОЖЬЛОЖЬЛОЖЬЛОЖЬЛОЖЬЛОЖЬ	ЛОЖЬЛОЖЬЛОЖЬtremolitic hornblendeЛОЖЬЛОЖЬЛОЖЬЛОЖЬЛОЖЬЛОЖЬЛОЖЬЛОЖЬЛОЖЬЛОЖЬ	tremoliteЛОЖЬЛОЖЬЛОЖЬЛОЖЬЛОЖЬЛОЖЬЛОЖЬЛОЖЬЛОЖЬЛОЖЬЛОЖЬЛОЖЬЛОЖЬ	tremoliteЛОЖЬЛОЖЬЛОЖЬЛОЖЬЛОЖЬЛОЖЬЛОЖЬЛОЖЬЛОЖЬЛОЖЬЛОЖЬЛОЖЬЛОЖЬ	ЛОЖЬЛОЖЬЛОЖЬtremolitic hornblendeЛОЖЬЛОЖЬЛОЖЬЛОЖЬЛОЖЬЛОЖЬЛОЖЬЛОЖЬЛОЖЬЛОЖЬ	tremoliteЛОЖЬЛОЖЬЛОЖЬЛОЖЬЛОЖЬЛОЖЬЛОЖЬЛОЖЬЛОЖЬЛОЖЬЛОЖЬЛОЖЬЛОЖЬ	tremoliteЛОЖЬЛОЖЬЛОЖЬЛОЖЬЛОЖЬЛОЖЬЛОЖЬЛОЖЬЛОЖЬЛОЖЬЛОЖЬЛОЖЬЛОЖЬ	ЛОЖЬЛОЖЬЛОЖЬtremolitic hornblendeЛОЖЬЛОЖЬЛОЖЬЛОЖЬЛОЖЬЛОЖЬЛОЖЬЛОЖЬЛОЖЬЛОЖЬ	ЛОЖЬЛОЖЬЛОЖЬtremolitic hornblendeЛОЖЬЛОЖЬЛОЖЬЛОЖЬЛОЖЬЛОЖЬЛОЖЬЛОЖЬЛОЖЬЛОЖЬ	ЛОЖЬЛОЖЬЛОЖЬtremolitic hornblendeЛОЖЬЛОЖЬЛОЖЬЛОЖЬЛОЖЬЛОЖЬЛОЖЬЛОЖЬЛОЖЬЛОЖЬ	ЛОЖЬЛОЖЬЛОЖЬtremolitic hornblendeЛОЖЬЛОЖЬЛОЖЬЛОЖЬЛОЖЬЛОЖЬЛОЖЬЛОЖЬЛОЖЬЛОЖЬ	ЛОЖЬЛОЖЬЛОЖЬtremolitic hornblendeЛОЖЬЛОЖЬЛОЖЬЛОЖЬЛОЖЬЛОЖЬЛОЖЬЛОЖЬЛОЖЬЛОЖЬ	ЛОЖЬЛОЖЬЛОЖЬtremolitic hornblendeЛОЖЬЛОЖЬЛОЖЬЛОЖЬЛОЖЬЛОЖЬЛОЖЬЛОЖЬЛОЖЬЛОЖЬ	ЛОЖЬЛОЖЬЛОЖЬtremolitic hornblendeЛОЖЬЛОЖЬЛОЖЬЛОЖЬЛОЖЬЛОЖЬЛОЖЬЛОЖЬЛОЖЬЛОЖЬ	tremoliteЛОЖЬЛОЖЬЛОЖЬЛОЖЬЛОЖЬЛОЖЬЛОЖЬЛОЖЬЛОЖЬЛОЖЬЛОЖЬЛОЖЬЛОЖЬ	ЛОЖЬЛОЖЬЛОЖЬtremolitic hornblendeЛОЖЬЛОЖЬЛОЖЬЛОЖЬЛОЖЬЛОЖЬЛОЖЬЛОЖЬЛОЖЬЛОЖЬ	ЛОЖЬЛОЖЬЛОЖЬtremolitic hornblendeЛОЖЬЛОЖЬЛОЖЬЛОЖЬЛОЖЬЛОЖЬЛОЖЬЛОЖЬЛОЖЬЛОЖЬ	ЛОЖЬЛОЖЬЛОЖЬtremolitic hornblendeЛОЖЬЛОЖЬЛОЖЬЛОЖЬЛОЖЬЛОЖЬЛОЖЬЛОЖЬЛОЖЬЛОЖЬ	ЛОЖЬЛОЖЬЛОЖЬtremolitic hornblendeЛОЖЬЛОЖЬЛОЖЬЛОЖЬЛОЖЬЛОЖЬЛОЖЬЛОЖЬЛОЖЬЛОЖЬ	tremoliteЛОЖЬЛОЖЬЛОЖЬЛОЖЬЛОЖЬЛОЖЬЛОЖЬЛОЖЬЛОЖЬЛОЖЬЛОЖЬЛОЖЬЛОЖЬ	ЛОЖЬЛОЖЬЛОЖЬtremolitic hornblendeЛОЖЬЛОЖЬЛОЖЬЛОЖЬЛОЖЬЛОЖЬЛОЖЬЛОЖЬЛОЖЬЛОЖЬ	ЛОЖЬЛОЖЬЛОЖЬtremolitic hornblendeЛОЖЬЛОЖЬЛОЖЬЛОЖЬЛОЖЬЛОЖЬЛОЖЬЛОЖЬЛОЖЬЛОЖЬ	ЛОЖЬЛОЖЬЛОЖЬtremolitic hornblendeЛОЖЬЛОЖЬЛОЖЬЛОЖЬЛОЖЬЛОЖЬЛОЖЬЛОЖЬЛОЖЬЛОЖЬ	ЛОЖЬЛОЖЬЛОЖЬtremolitic hornblendeЛОЖЬЛОЖЬЛОЖЬЛОЖЬЛОЖЬЛОЖЬЛОЖЬЛОЖЬЛОЖЬЛОЖЬ	ЛОЖЬЛОЖЬЛОЖЬtremolitic hornblendeЛОЖЬЛОЖЬЛОЖЬЛОЖЬЛОЖЬЛОЖЬЛОЖЬЛОЖЬЛОЖЬЛОЖЬ	ЛОЖЬЛОЖЬЛОЖЬtremolitic hornblendeЛОЖЬЛОЖЬЛОЖЬЛОЖЬЛОЖЬЛОЖЬЛОЖЬЛОЖЬЛОЖЬЛОЖЬ	ЛОЖЬЛОЖЬЛОЖЬtremolitic hornblendeЛОЖЬЛОЖЬЛОЖЬЛОЖЬЛОЖЬЛОЖЬЛОЖЬЛОЖЬЛОЖЬЛОЖЬ	ЛОЖЬЛОЖЬЛОЖЬЛОЖЬЛОЖЬЛОЖЬmagnesio-hornblendeЛОЖЬЛОЖЬЛОЖЬЛОЖЬЛОЖЬЛОЖЬЛОЖЬ	ЛОЖЬЛОЖЬЛОЖЬЛОЖЬЛОЖЬЛОЖЬmagnesio-hornblendeЛОЖЬЛОЖЬЛОЖЬЛОЖЬЛОЖЬЛОЖЬЛОЖЬ	ЛОЖЬЛОЖЬЛОЖЬЛОЖЬЛОЖЬЛОЖЬmagnesio-hornblendeЛОЖЬЛОЖЬЛОЖЬЛОЖЬЛОЖЬЛОЖЬЛОЖЬ	ЛОЖЬЛОЖЬЛОЖЬЛОЖЬЛОЖЬЛОЖЬmagnesio-hornblendeЛОЖЬЛОЖЬЛОЖЬЛОЖЬЛОЖЬЛОЖЬЛОЖЬ	ЛОЖЬЛОЖЬЛОЖЬtremolitic hornblendeЛОЖЬЛОЖЬЛОЖЬЛОЖЬЛОЖЬЛОЖЬЛОЖЬЛОЖЬЛОЖЬЛОЖЬ	ЛОЖЬЛОЖЬЛОЖЬtremolitic hornblendeЛОЖЬЛОЖЬЛОЖЬЛОЖЬЛОЖЬЛОЖЬЛОЖЬЛОЖЬЛОЖЬЛОЖЬ	ЛОЖЬЛОЖЬЛОЖЬЛОЖЬЛОЖЬЛОЖЬmagnesio-hornblendeЛОЖЬЛОЖЬЛОЖЬЛОЖЬЛОЖЬЛОЖЬЛОЖЬ	ЛОЖЬЛОЖЬЛОЖЬЛОЖЬЛОЖЬЛОЖЬmagnesio-hornblendeЛОЖЬЛОЖЬЛОЖЬЛОЖЬЛОЖЬЛОЖЬЛОЖЬ	ЛОЖЬЛОЖЬЛОЖЬЛОЖЬЛОЖЬЛОЖЬmagnesio-hornblendeЛОЖЬЛОЖЬЛОЖЬЛОЖЬЛОЖЬЛОЖЬЛОЖЬ
	tremolite	actinolite	magnesio-hornblende	ferro-actinolite	actinolite	tremolite	tremolitic hornblende	tremolitic hornblende	tremolite	tremolitic hornblende	tremolitic hornblende	tremolitic hornblende	tremolitic hornblende	tremolitic hornblende	tremolitic hornblende	tremolite	tremolite	tremolitic hornblende	tremolite	tremolite	tremolitic hornblende	tremolitic hornblende	tremolitic hornblende	tremolitic hornblende	tremolitic hornblende	tremolitic hornblende	tremolitic hornblende	tremolite	tremolitic hornblende	tremolitic hornblende	tremolitic hornblende	tremolitic hornblende	tremolite	tremolitic hornblende	tremolitic hornblende	tremolitic hornblende	tremolitic hornblende	tremolitic hornblende	tremolitic hornblende	tremolitic hornblende	magnesio-hornblende	magnesio-hornblende	magnesio-hornblende	magnesio-hornblende	tremolitic hornblende	tremolitic hornblende	magnesio-hornblende	magnesio-hornblende	magnesio-hornblende
Ca diagram 2	ЛОЖЬЛОЖЬЛОЖЬЛОЖЬЛОЖЬЛОЖЬЛОЖЬЛОЖЬЛОЖЬЛОЖЬЛОЖЬЛОЖЬЛОЖЬЛОЖЬЛОЖЬЛОЖЬЛОЖЬ	silicic edeniteЛОЖЬЛОЖЬЛОЖЬЛОЖЬЛОЖЬЛОЖЬЛОЖЬЛОЖЬЛОЖЬЛОЖЬЛОЖЬЛОЖЬЛОЖЬЛОЖЬЛОЖЬЛОЖЬ	ЛОЖЬЛОЖЬЛОЖЬЛОЖЬedenitic hornblendeЛОЖЬЛОЖЬЛОЖЬЛОЖЬЛОЖЬЛОЖЬЛОЖЬЛОЖЬЛОЖЬЛОЖЬЛОЖЬЛОЖЬ	ЛОЖЬsilicic ferro-edeniteЛОЖЬЛОЖЬЛОЖЬЛОЖЬЛОЖЬЛОЖЬЛОЖЬЛОЖЬЛОЖЬЛОЖЬЛОЖЬЛОЖЬЛОЖЬЛОЖЬЛОЖЬ	silicic edeniteЛОЖЬЛОЖЬЛОЖЬЛОЖЬЛОЖЬЛОЖЬЛОЖЬЛОЖЬЛОЖЬЛОЖЬЛОЖЬЛОЖЬЛОЖЬЛОЖЬЛОЖЬЛОЖЬ	silicic edeniteЛОЖЬЛОЖЬЛОЖЬЛОЖЬЛОЖЬЛОЖЬЛОЖЬЛОЖЬЛОЖЬЛОЖЬЛОЖЬЛОЖЬЛОЖЬЛОЖЬЛОЖЬЛОЖЬ	silicic edeniteЛОЖЬЛОЖЬЛОЖЬЛОЖЬЛОЖЬЛОЖЬЛОЖЬЛОЖЬЛОЖЬЛОЖЬЛОЖЬЛОЖЬЛОЖЬЛОЖЬЛОЖЬЛОЖЬ	silicic edeniteЛОЖЬЛОЖЬЛОЖЬЛОЖЬЛОЖЬЛОЖЬЛОЖЬЛОЖЬЛОЖЬЛОЖЬЛОЖЬЛОЖЬЛОЖЬЛОЖЬЛОЖЬЛОЖЬ	silicic edeniteЛОЖЬЛОЖЬЛОЖЬЛОЖЬЛОЖЬЛОЖЬЛОЖЬЛОЖЬЛОЖЬЛОЖЬЛОЖЬЛОЖЬЛОЖЬЛОЖЬЛОЖЬЛОЖЬ	silicic edeniteЛОЖЬЛОЖЬЛОЖЬЛОЖЬЛОЖЬЛОЖЬЛОЖЬЛОЖЬЛОЖЬЛОЖЬЛОЖЬЛОЖЬЛОЖЬЛОЖЬЛОЖЬЛОЖЬ	silicic edeniteЛОЖЬЛОЖЬЛОЖЬЛОЖЬЛОЖЬЛОЖЬЛОЖЬЛОЖЬЛОЖЬЛОЖЬЛОЖЬЛОЖЬЛОЖЬЛОЖЬЛОЖЬЛОЖЬ	silicic edeniteЛОЖЬЛОЖЬЛОЖЬЛОЖЬЛОЖЬЛОЖЬЛОЖЬЛОЖЬЛОЖЬЛОЖЬЛОЖЬЛОЖЬЛОЖЬЛОЖЬЛОЖЬЛОЖЬ	silicic edeniteЛОЖЬЛОЖЬЛОЖЬЛОЖЬЛОЖЬЛОЖЬЛОЖЬЛОЖЬЛОЖЬЛОЖЬЛОЖЬЛОЖЬЛОЖЬЛОЖЬЛОЖЬЛОЖЬ	silicic edeniteЛОЖЬЛОЖЬЛОЖЬЛОЖЬЛОЖЬЛОЖЬЛОЖЬЛОЖЬЛОЖЬЛОЖЬЛОЖЬЛОЖЬЛОЖЬЛОЖЬЛОЖЬЛОЖЬ	silicic edeniteЛОЖЬЛОЖЬЛОЖЬЛОЖЬЛОЖЬЛОЖЬЛОЖЬЛОЖЬЛОЖЬЛОЖЬЛОЖЬЛОЖЬЛОЖЬЛОЖЬЛОЖЬЛОЖЬ	silicic edeniteЛОЖЬЛОЖЬЛОЖЬЛОЖЬЛОЖЬЛОЖЬЛОЖЬЛОЖЬЛОЖЬЛОЖЬЛОЖЬЛОЖЬЛОЖЬЛОЖЬЛОЖЬЛОЖЬ	silicic edeniteЛОЖЬЛОЖЬЛОЖЬЛОЖЬЛОЖЬЛОЖЬЛОЖЬЛОЖЬЛОЖЬЛОЖЬЛОЖЬЛОЖЬЛОЖЬЛОЖЬЛОЖЬЛОЖЬ	silicic edeniteЛОЖЬЛОЖЬЛОЖЬЛОЖЬЛОЖЬЛОЖЬЛОЖЬЛОЖЬЛОЖЬЛОЖЬЛОЖЬЛОЖЬЛОЖЬЛОЖЬЛОЖЬЛОЖЬ	silicic edeniteЛОЖЬЛОЖЬЛОЖЬЛОЖЬЛОЖЬЛОЖЬЛОЖЬЛОЖЬЛОЖЬЛОЖЬЛОЖЬЛОЖЬЛОЖЬЛОЖЬЛОЖЬЛОЖЬ	silicic edeniteЛОЖЬЛОЖЬЛОЖЬЛОЖЬЛОЖЬЛОЖЬЛОЖЬЛОЖЬЛОЖЬЛОЖЬЛОЖЬЛОЖЬЛОЖЬЛОЖЬЛОЖЬЛОЖЬ	silicic edeniteЛОЖЬЛОЖЬЛОЖЬЛОЖЬЛОЖЬЛОЖЬЛОЖЬЛОЖЬЛОЖЬЛОЖЬЛОЖЬЛОЖЬЛОЖЬЛОЖЬЛОЖЬЛОЖЬ	silicic edeniteЛОЖЬЛОЖЬЛОЖЬЛОЖЬЛОЖЬЛОЖЬЛОЖЬЛОЖЬЛОЖЬЛОЖЬЛОЖЬЛОЖЬЛОЖЬЛОЖЬЛОЖЬЛОЖЬ	silicic edeniteЛОЖЬЛОЖЬЛОЖЬЛОЖЬЛОЖЬЛОЖЬЛОЖЬЛОЖЬЛОЖЬЛОЖЬЛОЖЬЛОЖЬЛОЖЬЛОЖЬЛОЖЬЛОЖЬ	silicic edeniteЛОЖЬЛОЖЬЛОЖЬЛОЖЬЛОЖЬЛОЖЬЛОЖЬЛОЖЬЛОЖЬЛОЖЬЛОЖЬЛОЖЬЛОЖЬЛОЖЬЛОЖЬЛОЖЬ	silicic edeniteЛОЖЬЛОЖЬЛОЖЬЛОЖЬЛОЖЬЛОЖЬЛОЖЬЛОЖЬЛОЖЬЛОЖЬЛОЖЬЛОЖЬЛОЖЬЛОЖЬЛОЖЬЛОЖЬ	silicic edeniteЛОЖЬЛОЖЬЛОЖЬЛОЖЬЛОЖЬЛОЖЬЛОЖЬЛОЖЬЛОЖЬЛОЖЬЛОЖЬЛОЖЬЛОЖЬЛОЖЬЛОЖЬЛОЖЬ	silicic edeniteЛОЖЬЛОЖЬЛОЖЬЛОЖЬЛОЖЬЛОЖЬЛОЖЬЛОЖЬЛОЖЬЛОЖЬЛОЖЬЛОЖЬЛОЖЬЛОЖЬЛОЖЬЛОЖЬ	silicic edeniteЛОЖЬЛОЖЬЛОЖЬЛОЖЬЛОЖЬЛОЖЬЛОЖЬЛОЖЬЛОЖЬЛОЖЬЛОЖЬЛОЖЬЛОЖЬЛОЖЬЛОЖЬЛОЖЬ	silicic edeniteЛОЖЬЛОЖЬЛОЖЬЛОЖЬЛОЖЬЛОЖЬЛОЖЬЛОЖЬЛОЖЬЛОЖЬЛОЖЬЛОЖЬЛОЖЬЛОЖЬЛОЖЬЛОЖЬ	silicic edeniteЛОЖЬЛОЖЬЛОЖЬЛОЖЬЛОЖЬЛОЖЬЛОЖЬЛОЖЬЛОЖЬЛОЖЬЛОЖЬЛОЖЬЛОЖЬЛОЖЬЛОЖЬЛОЖЬ	silicic edeniteЛОЖЬЛОЖЬЛОЖЬЛОЖЬЛОЖЬЛОЖЬЛОЖЬЛОЖЬЛОЖЬЛОЖЬЛОЖЬЛОЖЬЛОЖЬЛОЖЬЛОЖЬЛОЖЬ	silicic edeniteЛОЖЬЛОЖЬЛОЖЬЛОЖЬЛОЖЬЛОЖЬЛОЖЬЛОЖЬЛОЖЬЛОЖЬЛОЖЬЛОЖЬЛОЖЬЛОЖЬЛОЖЬЛОЖЬ	silicic edeniteЛОЖЬЛОЖЬЛОЖЬЛОЖЬЛОЖЬЛОЖЬЛОЖЬЛОЖЬЛОЖЬЛОЖЬЛОЖЬЛОЖЬЛОЖЬЛОЖЬЛОЖЬЛОЖЬ	silicic edeniteЛОЖЬЛОЖЬЛОЖЬЛОЖЬЛОЖЬЛОЖЬЛОЖЬЛОЖЬЛОЖЬЛОЖЬЛОЖЬЛОЖЬЛОЖЬЛОЖЬЛОЖЬЛОЖЬ	silicic edeniteЛОЖЬЛОЖЬЛОЖЬЛОЖЬЛОЖЬЛОЖЬЛОЖЬЛОЖЬЛОЖЬЛОЖЬЛОЖЬЛОЖЬЛОЖЬЛОЖЬЛОЖЬЛОЖЬ	silicic edeniteЛОЖЬЛОЖЬЛОЖЬЛОЖЬЛОЖЬЛОЖЬЛОЖЬЛОЖЬЛОЖЬЛОЖЬЛОЖЬЛОЖЬЛОЖЬЛОЖЬЛОЖЬЛОЖЬ	silicic edeniteЛОЖЬЛОЖЬЛОЖЬЛОЖЬЛОЖЬЛОЖЬЛОЖЬЛОЖЬЛОЖЬЛОЖЬЛОЖЬЛОЖЬЛОЖЬЛОЖЬЛОЖЬЛОЖЬ	silicic edeniteЛОЖЬЛОЖЬЛОЖЬЛОЖЬЛОЖЬЛОЖЬЛОЖЬЛОЖЬЛОЖЬЛОЖЬЛОЖЬЛОЖЬЛОЖЬЛОЖЬЛОЖЬЛОЖЬ	silicic edeniteЛОЖЬЛОЖЬЛОЖЬЛОЖЬЛОЖЬЛОЖЬЛОЖЬЛОЖЬЛОЖЬЛОЖЬЛОЖЬЛОЖЬЛОЖЬЛОЖЬЛОЖЬЛОЖЬ	silicic edeniteЛОЖЬЛОЖЬЛОЖЬЛОЖЬЛОЖЬЛОЖЬЛОЖЬЛОЖЬЛОЖЬЛОЖЬЛОЖЬЛОЖЬЛОЖЬЛОЖЬЛОЖЬЛОЖЬ	ЛОЖЬЛОЖЬedeniteЛОЖЬЛОЖЬЛОЖЬЛОЖЬЛОЖЬЛОЖЬЛОЖЬЛОЖЬЛОЖЬЛОЖЬЛОЖЬЛОЖЬЛОЖЬЛОЖЬ	ЛОЖЬЛОЖЬedeniteЛОЖЬЛОЖЬЛОЖЬЛОЖЬЛОЖЬЛОЖЬЛОЖЬЛОЖЬЛОЖЬЛОЖЬЛОЖЬЛОЖЬЛОЖЬЛОЖЬ	ЛОЖЬЛОЖЬedeniteЛОЖЬЛОЖЬЛОЖЬЛОЖЬЛОЖЬЛОЖЬЛОЖЬЛОЖЬЛОЖЬЛОЖЬЛОЖЬЛОЖЬЛОЖЬЛОЖЬ	ЛОЖЬЛОЖЬedeniteЛОЖЬЛОЖЬЛОЖЬЛОЖЬЛОЖЬЛОЖЬЛОЖЬЛОЖЬЛОЖЬЛОЖЬЛОЖЬЛОЖЬЛОЖЬЛОЖЬ	silicic edeniteЛОЖЬЛОЖЬЛОЖЬЛОЖЬЛОЖЬЛОЖЬЛОЖЬЛОЖЬЛОЖЬЛОЖЬЛОЖЬЛОЖЬЛОЖЬЛОЖЬЛОЖЬЛОЖЬ	silicic edeniteЛОЖЬЛОЖЬЛОЖЬЛОЖЬЛОЖЬЛОЖЬЛОЖЬЛОЖЬЛОЖЬЛОЖЬЛОЖЬЛОЖЬЛОЖЬЛОЖЬЛОЖЬЛОЖЬ	ЛОЖЬЛОЖЬedeniteЛОЖЬЛОЖЬЛОЖЬЛОЖЬЛОЖЬЛОЖЬЛОЖЬЛОЖЬЛОЖЬЛОЖЬЛОЖЬЛОЖЬЛОЖЬЛОЖЬ	ЛОЖЬЛОЖЬedeniteЛОЖЬЛОЖЬЛОЖЬЛОЖЬЛОЖЬЛОЖЬЛОЖЬЛОЖЬЛОЖЬЛОЖЬЛОЖЬЛОЖЬЛОЖЬЛОЖЬ	ЛОЖЬЛОЖЬedeniteЛОЖЬЛОЖЬЛОЖЬЛОЖЬЛОЖЬЛОЖЬЛОЖЬЛОЖЬЛОЖЬЛОЖЬЛОЖЬЛОЖЬЛОЖЬЛОЖЬ
		silicic edenite	edenitic hornblende	silicic ferro-edenite	silicic edenite	silicic edenite	silicic edenite	silicic edenite	silicic edenite	silicic edenite	silicic edenite	silicic edenite	silicic edenite	silicic edenite	silicic edenite	silicic edenite	silicic edenite	silicic edenite	silicic edenite	silicic edenite	silicic edenite	silicic edenite	silicic edenite	silicic edenite	silicic edenite	silicic edenite	silicic edenite	silicic edenite	silicic edenite	silicic edenite	silicic edenite	silicic edenite	silicic edenite	silicic edenite	silicic edenite	silicic edenite	silicic edenite	silicic edenite	silicic edenite	silicic edenite	edenite	edenite	edenite	edenite	silicic edenite	silicic edenite	edenite	edenite	edenite
Ca diagram 3	ЛОЖЬЛОЖЬЛОЖЬЛОЖЬЛОЖЬЛОЖЬЛОЖЬЛОЖЬЛОЖЬЛОЖЬЛОЖЬЛОЖЬЛОЖЬЛОЖЬЛОЖЬ	silicic edeniteЛОЖЬЛОЖЬЛОЖЬЛОЖЬЛОЖЬЛОЖЬЛОЖЬЛОЖЬЛОЖЬЛОЖЬЛОЖЬЛОЖЬЛОЖЬЛОЖЬ	ЛОЖЬЛОЖЬЛОЖЬЛОЖЬedenitic hornblendeЛОЖЬЛОЖЬЛОЖЬЛОЖЬЛОЖЬЛОЖЬЛОЖЬЛОЖЬЛОЖЬЛОЖЬ	ЛОЖЬsilicic ferro-edeniteЛОЖЬЛОЖЬЛОЖЬЛОЖЬЛОЖЬЛОЖЬЛОЖЬЛОЖЬЛОЖЬЛОЖЬЛОЖЬЛОЖЬЛОЖЬ	silicic edeniteЛОЖЬЛОЖЬЛОЖЬЛОЖЬЛОЖЬЛОЖЬЛОЖЬЛОЖЬЛОЖЬЛОЖЬЛОЖЬЛОЖЬЛОЖЬЛОЖЬ	silicic edeniteЛОЖЬЛОЖЬЛОЖЬЛОЖЬЛОЖЬЛОЖЬЛОЖЬЛОЖЬЛОЖЬЛОЖЬЛОЖЬЛОЖЬЛОЖЬЛОЖЬ	silicic edeniteЛОЖЬЛОЖЬЛОЖЬЛОЖЬЛОЖЬЛОЖЬЛОЖЬЛОЖЬЛОЖЬЛОЖЬЛОЖЬЛОЖЬЛОЖЬЛОЖЬ	silicic edeniteЛОЖЬЛОЖЬЛОЖЬЛОЖЬЛОЖЬЛОЖЬЛОЖЬЛОЖЬЛОЖЬЛОЖЬЛОЖЬЛОЖЬЛОЖЬЛОЖЬ	silicic edeniteЛОЖЬЛОЖЬЛОЖЬЛОЖЬЛОЖЬЛОЖЬЛОЖЬЛОЖЬЛОЖЬЛОЖЬЛОЖЬЛОЖЬЛОЖЬЛОЖЬ	silicic edeniteЛОЖЬЛОЖЬЛОЖЬЛОЖЬЛОЖЬЛОЖЬЛОЖЬЛОЖЬЛОЖЬЛОЖЬЛОЖЬЛОЖЬЛОЖЬЛОЖЬ	silicic edeniteЛОЖЬЛОЖЬЛОЖЬЛОЖЬЛОЖЬЛОЖЬЛОЖЬЛОЖЬЛОЖЬЛОЖЬЛОЖЬЛОЖЬЛОЖЬЛОЖЬ	silicic edeniteЛОЖЬЛОЖЬЛОЖЬЛОЖЬЛОЖЬЛОЖЬЛОЖЬЛОЖЬЛОЖЬЛОЖЬЛОЖЬЛОЖЬЛОЖЬЛОЖЬ	silicic edeniteЛОЖЬЛОЖЬЛОЖЬЛОЖЬЛОЖЬЛОЖЬЛОЖЬЛОЖЬЛОЖЬЛОЖЬЛОЖЬЛОЖЬЛОЖЬЛОЖЬ	silicic edeniteЛОЖЬЛОЖЬЛОЖЬЛОЖЬЛОЖЬЛОЖЬЛОЖЬЛОЖЬЛОЖЬЛОЖЬЛОЖЬЛОЖЬЛОЖЬЛОЖЬ	silicic edeniteЛОЖЬЛОЖЬЛОЖЬЛОЖЬЛОЖЬЛОЖЬЛОЖЬЛОЖЬЛОЖЬЛОЖЬЛОЖЬЛОЖЬЛОЖЬЛОЖЬ	silicic edeniteЛОЖЬЛОЖЬЛОЖЬЛОЖЬЛОЖЬЛОЖЬЛОЖЬЛОЖЬЛОЖЬЛОЖЬЛОЖЬЛОЖЬЛОЖЬЛОЖЬ	silicic edeniteЛОЖЬЛОЖЬЛОЖЬЛОЖЬЛОЖЬЛОЖЬЛОЖЬЛОЖЬЛОЖЬЛОЖЬЛОЖЬЛОЖЬЛОЖЬЛОЖЬ	silicic edeniteЛОЖЬЛОЖЬЛОЖЬЛОЖЬЛОЖЬЛОЖЬЛОЖЬЛОЖЬЛОЖЬЛОЖЬЛОЖЬЛОЖЬЛОЖЬЛОЖЬ	silicic edeniteЛОЖЬЛОЖЬЛОЖЬЛОЖЬЛОЖЬЛОЖЬЛОЖЬЛОЖЬЛОЖЬЛОЖЬЛОЖЬЛОЖЬЛОЖЬЛОЖЬ	silicic edeniteЛОЖЬЛОЖЬЛОЖЬЛОЖЬЛОЖЬЛОЖЬЛОЖЬЛОЖЬЛОЖЬЛОЖЬЛОЖЬЛОЖЬЛОЖЬЛОЖЬ	silicic edeniteЛОЖЬЛОЖЬЛОЖЬЛОЖЬЛОЖЬЛОЖЬЛОЖЬЛОЖЬЛОЖЬЛОЖЬЛОЖЬЛОЖЬЛОЖЬЛОЖЬ	silicic edeniteЛОЖЬЛОЖЬЛОЖЬЛОЖЬЛОЖЬЛОЖЬЛОЖЬЛОЖЬЛОЖЬЛОЖЬЛОЖЬЛОЖЬЛОЖЬЛОЖЬ	silicic edeniteЛОЖЬЛОЖЬЛОЖЬЛОЖЬЛОЖЬЛОЖЬЛОЖЬЛОЖЬЛОЖЬЛОЖЬЛОЖЬЛОЖЬЛОЖЬЛОЖЬ	silicic edeniteЛОЖЬЛОЖЬЛОЖЬЛОЖЬЛОЖЬЛОЖЬЛОЖЬЛОЖЬЛОЖЬЛОЖЬЛОЖЬЛОЖЬЛОЖЬЛОЖЬ	silicic edeniteЛОЖЬЛОЖЬЛОЖЬЛОЖЬЛОЖЬЛОЖЬЛОЖЬЛОЖЬЛОЖЬЛОЖЬЛОЖЬЛОЖЬЛОЖЬЛОЖЬ	silicic edeniteЛОЖЬЛОЖЬЛОЖЬЛОЖЬЛОЖЬЛОЖЬЛОЖЬЛОЖЬЛОЖЬЛОЖЬЛОЖЬЛОЖЬЛОЖЬЛОЖЬ	silicic edeniteЛОЖЬЛОЖЬЛОЖЬЛОЖЬЛОЖЬЛОЖЬЛОЖЬЛОЖЬЛОЖЬЛОЖЬЛОЖЬЛОЖЬЛОЖЬЛОЖЬ	silicic edeniteЛОЖЬЛОЖЬЛОЖЬЛОЖЬЛОЖЬЛОЖЬЛОЖЬЛОЖЬЛОЖЬЛОЖЬЛОЖЬЛОЖЬЛОЖЬЛОЖЬ	silicic edeniteЛОЖЬЛОЖЬЛОЖЬЛОЖЬЛОЖЬЛОЖЬЛОЖЬЛОЖЬЛОЖЬЛОЖЬЛОЖЬЛОЖЬЛОЖЬЛОЖЬ	silicic edeniteЛОЖЬЛОЖЬЛОЖЬЛОЖЬЛОЖЬЛОЖЬЛОЖЬЛОЖЬЛОЖЬЛОЖЬЛОЖЬЛОЖЬЛОЖЬЛОЖЬ	silicic edeniteЛОЖЬЛОЖЬЛОЖЬЛОЖЬЛОЖЬЛОЖЬЛОЖЬЛОЖЬЛОЖЬЛОЖЬЛОЖЬЛОЖЬЛОЖЬЛОЖЬ	silicic edeniteЛОЖЬЛОЖЬЛОЖЬЛОЖЬЛОЖЬЛОЖЬЛОЖЬЛОЖЬЛОЖЬЛОЖЬЛОЖЬЛОЖЬЛОЖЬЛОЖЬ	silicic edeniteЛОЖЬЛОЖЬЛОЖЬЛОЖЬЛОЖЬЛОЖЬЛОЖЬЛОЖЬЛОЖЬЛОЖЬЛОЖЬЛОЖЬЛОЖЬЛОЖЬ	silicic edeniteЛОЖЬЛОЖЬЛОЖЬЛОЖЬЛОЖЬЛОЖЬЛОЖЬЛОЖЬЛОЖЬЛОЖЬЛОЖЬЛОЖЬЛОЖЬЛОЖЬ	silicic edeniteЛОЖЬЛОЖЬЛОЖЬЛОЖЬЛОЖЬЛОЖЬЛОЖЬЛОЖЬЛОЖЬЛОЖЬЛОЖЬЛОЖЬЛОЖЬЛОЖЬ	silicic edeniteЛОЖЬЛОЖЬЛОЖЬЛОЖЬЛОЖЬЛОЖЬЛОЖЬЛОЖЬЛОЖЬЛОЖЬЛОЖЬЛОЖЬЛОЖЬЛОЖЬ	silicic edeniteЛОЖЬЛОЖЬЛОЖЬЛОЖЬЛОЖЬЛОЖЬЛОЖЬЛОЖЬЛОЖЬЛОЖЬЛОЖЬЛОЖЬЛОЖЬЛОЖЬ	silicic edeniteЛОЖЬЛОЖЬЛОЖЬЛОЖЬЛОЖЬЛОЖЬЛОЖЬЛОЖЬЛОЖЬЛОЖЬЛОЖЬЛОЖЬЛОЖЬЛОЖЬ	silicic edeniteЛОЖЬЛОЖЬЛОЖЬЛОЖЬЛОЖЬЛОЖЬЛОЖЬЛОЖЬЛОЖЬЛОЖЬЛОЖЬЛОЖЬЛОЖЬЛОЖЬ	silicic edeniteЛОЖЬЛОЖЬЛОЖЬЛОЖЬЛОЖЬЛОЖЬЛОЖЬЛОЖЬЛОЖЬЛОЖЬЛОЖЬЛОЖЬЛОЖЬЛОЖЬ	ЛОЖЬЛОЖЬedeniteЛОЖЬЛОЖЬЛОЖЬЛОЖЬЛОЖЬЛОЖЬЛОЖЬЛОЖЬЛОЖЬЛОЖЬЛОЖЬЛОЖЬ	ЛОЖЬЛОЖЬedeniteЛОЖЬЛОЖЬЛОЖЬЛОЖЬЛОЖЬЛОЖЬЛОЖЬЛОЖЬЛОЖЬЛОЖЬЛОЖЬЛОЖЬ	ЛОЖЬЛОЖЬedeniteЛОЖЬЛОЖЬЛОЖЬЛОЖЬЛОЖЬЛОЖЬЛОЖЬЛОЖЬЛОЖЬЛОЖЬЛОЖЬЛОЖЬ	ЛОЖЬЛОЖЬedeniteЛОЖЬЛОЖЬЛОЖЬЛОЖЬЛОЖЬЛОЖЬЛОЖЬЛОЖЬЛОЖЬЛОЖЬЛОЖЬЛОЖЬ	silicic edeniteЛОЖЬЛОЖЬЛОЖЬЛОЖЬЛОЖЬЛОЖЬЛОЖЬЛОЖЬЛОЖЬЛОЖЬЛОЖЬЛОЖЬЛОЖЬЛОЖЬ	silicic edeniteЛОЖЬЛОЖЬЛОЖЬЛОЖЬЛОЖЬЛОЖЬЛОЖЬЛОЖЬЛОЖЬЛОЖЬЛОЖЬЛОЖЬЛОЖЬЛОЖЬ	ЛОЖЬЛОЖЬedeniteЛОЖЬЛОЖЬЛОЖЬЛОЖЬЛОЖЬЛОЖЬЛОЖЬЛОЖЬЛОЖЬЛОЖЬЛОЖЬЛОЖЬ	ЛОЖЬЛОЖЬedeniteЛОЖЬЛОЖЬЛОЖЬЛОЖЬЛОЖЬЛОЖЬЛОЖЬЛОЖЬЛОЖЬЛОЖЬЛОЖЬЛОЖЬ	ЛОЖЬЛОЖЬedeniteЛОЖЬЛОЖЬЛОЖЬЛОЖЬЛОЖЬЛОЖЬЛОЖЬЛОЖЬЛОЖЬЛОЖЬЛОЖЬЛОЖЬ
		silicic edenite	edenitic hornblende	silicic ferro-edenite	silicic edenite	silicic edenite	silicic edenite	silicic edenite	silicic edenite	silicic edenite	silicic edenite	silicic edenite	silicic edenite	silicic edenite	silicic edenite	silicic edenite	silicic edenite	silicic edenite	silicic edenite	silicic edenite	silicic edenite	silicic edenite	silicic edenite	silicic edenite	silicic edenite	silicic edenite	silicic edenite	silicic edenite	silicic edenite	silicic edenite	silicic edenite	silicic edenite	silicic edenite	silicic edenite	silicic edenite	silicic edenite	silicic edenite	silicic edenite	silicic edenite	silicic edenite	edenite	edenite	edenite	edenite	silicic edenite	silicic edenite	edenite	edenite	edenite
Ca diagram 4	FALSE	FALSE	FALSE	FALSE	FALSE	FALSE	FALSE	FALSE	FALSE	FALSE	FALSE	FALSE	FALSE	FALSE	FALSE	FALSE	FALSE	FALSE	FALSE	FALSE	FALSE	FALSE	FALSE	FALSE	FALSE	FALSE	FALSE	FALSE	FALSE	FALSE	FALSE	FALSE	FALSE	FALSE	FALSE	FALSE	FALSE	FALSE	FALSE	FALSE	FALSE	FALSE	FALSE	FALSE	FALSE	FALSE	FALSE	FALSE	FALSE
Fe-Mg-Mn orthorhombic diagram	magnesio-anthophyllite	anthophyllite	magnesio-gedrite	anthophyllite	anthophyllite	magnesio-anthophyllite	magnesio-anthophyllite	magnesio-anthophyllite	magnesio-anthophyllite	magnesio-anthophyllite	magnesio-anthophyllite	magnesio-anthophyllite	magnesio-anthophyllite	magnesio-anthophyllite	magnesio-anthophyllite	magnesio-anthophyllite	magnesio-anthophyllite	magnesio-anthophyllite	magnesio-anthophyllite	magnesio-anthophyllite	magnesio-anthophyllite	magnesio-anthophyllite	magnesio-anthophyllite	magnesio-anthophyllite	magnesio-anthophyllite	magnesio-anthophyllite	magnesio-anthophyllite	magnesio-anthophyllite	magnesio-anthophyllite	magnesio-anthophyllite	magnesio-anthophyllite	magnesio-anthophyllite	magnesio-anthophyllite	magnesio-anthophyllite	magnesio-anthophyllite	magnesio-anthophyllite	magnesio-anthophyllite	magnesio-anthophyllite	magnesio-anthophyllite	magnesio-anthophyllite	magnesio-anthophyllite	magnesio-anthophyllite	magnesio-anthophyllite	magnesio-anthophyllite	magnesio-anthophyllite	magnesio-anthophyllite	magnesio-anthophyllite	magnesio-anthophyllite	magnesio-anthophyllite
Fe-Mg-Mn monoclinic diagram	magnesio-cummingtonite	cummingtonite	magnesio-cummingtonite	dannemoreite	tirodite	magnesio-cummingtonite	magnesio-cummingtonite	magnesio-cummingtonite	magnesio-cummingtonite	magnesio-cummingtonite	magnesio-cummingtonite	magnesio-cummingtonite	magnesio-cummingtonite	magnesio-cummingtonite	magnesio-cummingtonite	magnesio-cummingtonite	magnesio-cummingtonite	magnesio-cummingtonite	magnesio-cummingtonite	magnesio-cummingtonite	magnesio-cummingtonite	magnesio-cummingtonite	magnesio-cummingtonite	magnesio-cummingtonite	magnesio-cummingtonite	magnesio-cummingtonite	magnesio-cummingtonite	magnesio-cummingtonite	magnesio-cummingtonite	magnesio-cummingtonite	magnesio-cummingtonite	magnesio-cummingtonite	magnesio-cummingtonite	magnesio-cummingtonite	magnesio-cummingtonite	magnesio-cummingtonite	magnesio-cummingtonite	magnesio-cummingtonite	magnesio-cummingtonite	magnesio-cummingtonite	magnesio-cummingtonite	magnesio-cummingtonite	magnesio-cummingtonite	magnesio-cummingtonite	magnesio-cummingtonite	magnesio-cummingtonite	magnesio-cummingtonite	magnesio-cummingtonite	magnesio-cummingtonite
Na-Ca diagram 1	winchite	winchite	barroisite	ferro-winchite	winchite	winchite	barroisite	barroisite	winchite	barroisite	barroisite	barroisite	barroisite	barroisite	barroisite	winchite	winchite	barroisite	winchite	winchite	barroisite	barroisite	barroisite	barroisite	barroisite	barroisite	barroisite	winchite	barroisite	barroisite	barroisite	barroisite	winchite	barroisite	barroisite	barroisite	barroisite	barroisite	barroisite	barroisite	barroisite	barroisite	barroisite	barroisite	barroisite	barroisite	barroisite	barroisite	barroisite
Na-Ca diagram 2	richterite	richterite	magnesio-kataphorite	ferro-richterite	richterite	richterite	magnesio-kataphorite	magnesio-kataphorite	richterite	magnesio-kataphorite	magnesio-kataphorite	magnesio-kataphorite	magnesio-kataphorite	magnesio-kataphorite	magnesio-kataphorite	richterite	richterite	magnesio-kataphorite	richterite	richterite	magnesio-kataphorite	magnesio-kataphorite	magnesio-kataphorite	magnesio-kataphorite	magnesio-kataphorite	magnesio-kataphorite	magnesio-kataphorite	richterite	magnesio-kataphorite	magnesio-kataphorite	magnesio-kataphorite	magnesio-kataphorite	richterite	magnesio-kataphorite	magnesio-kataphorite	magnesio-kataphorite	magnesio-kataphorite	magnesio-kataphorite	magnesio-kataphorite	magnesio-kataphorite	magnesio-kataphorite	magnesio-kataphorite	magnesio-kataphorite	magnesio-kataphorite	magnesio-kataphorite	magnesio-kataphorite	magnesio-kataphorite	magnesio-kataphorite	magnesio-kataphorite
Alkali diagram 1	nyboite	nyboite	nyboite	ferro-anophorite	nyboite	anophorite	anophorite	anophorite	nyboite	anophorite	anophorite	anophorite	anophorite	anophorite	anophorite	anophorite	anophorite	anophorite	nyboite	anophorite	anophorite	anophorite	anophorite	anophorite	anophorite	anophorite	anophorite	nyboite	anophorite	anophorite	anophorite	anophorite	anophorite	anophorite	anophorite	anophorite	anophorite	anophorite	anophorite	anophorite	anophorite	anophorite	anophorite	anophorite	anophorite	anophorite	anophorite	anophorite	anophorite
Alkali diagram 2	glaucophane	glaucophane	glaucophane	riebeckite	glaucophane	magnesio-riebeckite	magnesio-riebeckite	magnesio-riebeckite	glaucophane	magnesio-riebeckite	magnesio-riebeckite	magnesio-riebeckite	magnesio-riebeckite	magnesio-riebeckite	magnesio-riebeckite	magnesio-riebeckite	magnesio-riebeckite	magnesio-riebeckite	glaucophane	magnesio-riebeckite	magnesio-riebeckite	magnesio-riebeckite	magnesio-riebeckite	magnesio-riebeckite	magnesio-riebeckite	magnesio-riebeckite	magnesio-riebeckite	glaucophane	magnesio-riebeckite	magnesio-riebeckite	magnesio-riebeckite	magnesio-riebeckite	magnesio-riebeckite	magnesio-riebeckite	magnesio-riebeckite	magnesio-riebeckite	magnesio-riebeckite	magnesio-riebeckite	magnesio-riebeckite	magnesio-riebeckite	magnesio-riebeckite	magnesio-riebeckite	magnesio-riebeckite	magnesio-riebeckite	magnesio-riebeckite	magnesio-riebeckite	magnesio-riebeckite	magnesio-riebeckite	magnesio-riebeckite
Alkali diagram 3	eckermannite	eckermannite	eckermannite	arfvedsonite	eckermannite	magnesio-arfvedsonite	magnesio-arfvedsonite	magnesio-arfvedsonite	eckermannite	magnesio-arfvedsonite	magnesio-arfvedsonite	magnesio-arfvedsonite	magnesio-arfvedsonite	magnesio-arfvedsonite	magnesio-arfvedsonite	magnesio-arfvedsonite	magnesio-arfvedsonite	magnesio-arfvedsonite	eckermannite	magnesio-arfvedsonite	magnesio-arfvedsonite	magnesio-arfvedsonite	magnesio-arfvedsonite	magnesio-arfvedsonite	magnesio-arfvedsonite	magnesio-arfvedsonite	magnesio-arfvedsonite	eckermannite	magnesio-arfvedsonite	magnesio-arfvedsonite	magnesio-arfvedsonite	magnesio-arfvedsonite	magnesio-arfvedsonite	magnesio-arfvedsonite	magnesio-arfvedsonite	magnesio-arfvedsonite	magnesio-arfvedsonite	magnesio-arfvedsonite	magnesio-arfvedsonite	magnesio-arfvedsonite	magnesio-arfvedsonite	magnesio-arfvedsonite	magnesio-arfvedsonite	magnesio-arfvedsonite	magnesio-arfvedsonite	magnesio-arfvedsonite	magnesio-arfvedsonite	magnesio-arfvedsonite	magnesio-arfvedsonite
Alkali diagram 4 (kozulite)	FALSE	FALSE	FALSE	FALSE	FALSE	FALSE	FALSE	FALSE	FALSE	FALSE	FALSE	FALSE	FALSE	FALSE	FALSE	FALSE	FALSE	FALSE	FALSE	FALSE	FALSE	FALSE	FALSE	FALSE	FALSE	FALSE	FALSE	FALSE	FALSE	FALSE	FALSE	FALSE	FALSE	FALSE	FALSE	FALSE	FALSE	FALSE	FALSE	FALSE	FALSE	FALSE	FALSE	FALSE	FALSE	FALSE	FALSE	FALSE	FALSE
Part 13. Select TRUE name for each group
Ca amph definition	FALSE	FALSE	FALSE	FALSE	FALSE	FALSE	FALSE	FALSE	FALSE	FALSE	FALSE	FALSE	FALSE	FALSE	FALSE	FALSE	FALSE	FALSE	FALSE	FALSE	FALSE	FALSE	FALSE	FALSE	FALSE	FALSE	FALSE	FALSE	FALSE	FALSE	FALSE	FALSE	FALSE	FALSE	tremolitic hornblende	FALSE	FALSE	FALSE	FALSE	FALSE	FALSE	FALSE	FALSE	FALSE	FALSE	FALSE	FALSE	FALSE	FALSE
	FALSE	FALSE	FALSE	FALSE	FALSE	FALSE	FALSE	FALSE	FALSE	FALSE	FALSE	FALSE	FALSE	FALSE	FALSE	FALSE	FALSE	FALSE	silicic edenite	FALSE	FALSE	FALSE	FALSE	FALSE	FALSE	FALSE	FALSE	silicic edenite	FALSE	FALSE	FALSE	FALSE	FALSE	FALSE	FALSE	FALSE	FALSE	FALSE	FALSE	FALSE	FALSE	FALSE	FALSE	FALSE	FALSE	FALSE	FALSE	FALSE	FALSE
	FALSE	FALSE	FALSE	FALSE	FALSE	silicic edenite	silicic edenite	silicic edenite	FALSE	silicic edenite	FALSE	silicic edenite	silicic edenite	silicic edenite	silicic edenite	FALSE	silicic edenite	silicic edenite	FALSE	silicic edenite	FALSE	FALSE	silicic edenite	silicic edenite	silicic edenite	silicic edenite	silicic edenite	FALSE	FALSE	silicic edenite	silicic edenite	silicic edenite	silicic edenite	silicic edenite	FALSE	silicic edenite	silicic edenite	silicic edenite	silicic edenite	silicic edenite	edenite	edenite	edenite	edenite	silicic edenite	FALSE	edenite	edenite	edenite
	FALSE	FALSE	FALSE	FALSE	FALSE	FALSE	FALSE	FALSE	FALSE	FALSE	FALSE	FALSE	FALSE	FALSE	FALSE	FALSE	FALSE	FALSE	FALSE	FALSE	FALSE	FALSE	FALSE	FALSE	FALSE	FALSE	FALSE	FALSE	FALSE	FALSE	FALSE	FALSE	FALSE	FALSE	FALSE	FALSE	FALSE	FALSE	FALSE	FALSE	FALSE	FALSE	FALSE	FALSE	FALSE	FALSE	FALSE	FALSE	FALSE
Fe-Mg-Mn definition	FALSE	FALSE	FALSE	dannemoreite	tirodite	FALSE	FALSE	FALSE	FALSE	FALSE	FALSE	FALSE	FALSE	FALSE	FALSE	FALSE	FALSE	FALSE	FALSE	FALSE	FALSE	FALSE	FALSE	FALSE	FALSE	FALSE	FALSE	FALSE	FALSE	FALSE	FALSE	FALSE	FALSE	FALSE	FALSE	FALSE	FALSE	FALSE	FALSE	FALSE	FALSE	FALSE	FALSE	FALSE	FALSE	FALSE	FALSE	FALSE	FALSE
	magnesio-cummingtonite	cummingtonite	magnesio-cummingtonite			magnesio-cummingtonite	magnesio-cummingtonite	magnesio-cummingtonite	magnesio-cummingtonite	magnesio-cummingtonite	magnesio-cummingtonite	magnesio-cummingtonite	magnesio-cummingtonite	magnesio-cummingtonite	magnesio-cummingtonite	magnesio-cummingtonite	magnesio-cummingtonite	magnesio-cummingtonite	magnesio-cummingtonite	magnesio-cummingtonite	magnesio-cummingtonite	magnesio-cummingtonite	magnesio-cummingtonite	magnesio-cummingtonite	magnesio-cummingtonite	magnesio-cummingtonite	magnesio-cummingtonite	magnesio-cummingtonite	magnesio-cummingtonite	magnesio-cummingtonite	magnesio-cummingtonite	magnesio-cummingtonite	magnesio-cummingtonite	magnesio-cummingtonite	magnesio-cummingtonite	magnesio-cummingtonite	magnesio-cummingtonite	magnesio-cummingtonite	magnesio-cummingtonite	magnesio-cummingtonite	magnesio-cummingtonite	magnesio-cummingtonite	magnesio-cummingtonite	magnesio-cummingtonite	magnesio-cummingtonite	magnesio-cummingtonite	magnesio-cummingtonite	magnesio-cummingtonite	magnesio-cummingtonite
Na-Ca amph definition	FALSE	FALSE	FALSE	FALSE	FALSE	FALSE	FALSE	FALSE	FALSE	FALSE	FALSE	FALSE	FALSE	FALSE	FALSE	FALSE	FALSE	FALSE	FALSE	FALSE	FALSE	FALSE	FALSE	FALSE	FALSE	FALSE	FALSE	FALSE	FALSE	FALSE	FALSE	FALSE	FALSE	FALSE	FALSE	FALSE	FALSE	FALSE	FALSE	FALSE	FALSE	FALSE	FALSE	FALSE	FALSE	FALSE	FALSE	FALSE	FALSE
	FALSE	FALSE	FALSE	FALSE	FALSE	FALSE	FALSE	FALSE	richterite	FALSE	magnesio-kataphorite	FALSE	FALSE	FALSE	FALSE	richterite	FALSE	FALSE	FALSE	FALSE	magnesio-kataphorite	magnesio-kataphorite	FALSE	FALSE	FALSE	FALSE	FALSE	FALSE	magnesio-kataphorite	FALSE	FALSE	FALSE	FALSE	FALSE	FALSE	FALSE	FALSE	FALSE	FALSE	FALSE	FALSE	FALSE	FALSE	FALSE	FALSE	magnesio-kataphorite	FALSE	FALSE	FALSE
Alkali amph definition	FALSE	FALSE	FALSE	FALSE	FALSE	FALSE	FALSE	FALSE	FALSE	FALSE	FALSE	FALSE	FALSE	FALSE	FALSE	FALSE	FALSE	FALSE	FALSE	FALSE	FALSE	FALSE	FALSE	FALSE	FALSE	FALSE	FALSE	FALSE	FALSE	FALSE	FALSE	FALSE	FALSE	FALSE	FALSE	FALSE	FALSE	FALSE	FALSE	FALSE	FALSE	FALSE	FALSE	FALSE	FALSE	FALSE	FALSE	FALSE	FALSE
	FALSE	FALSE	FALSE	FALSE	FALSE	FALSE	FALSE	FALSE	FALSE	FALSE	FALSE	FALSE	FALSE	FALSE	FALSE	FALSE	FALSE	FALSE	FALSE	FALSE	FALSE	FALSE	FALSE	FALSE	FALSE	FALSE	FALSE	FALSE	FALSE	FALSE	FALSE	FALSE	FALSE	FALSE	FALSE	FALSE	FALSE	FALSE	FALSE	FALSE	FALSE	FALSE	FALSE	FALSE	FALSE	FALSE	FALSE	FALSE	FALSE
	FALSE	FALSE	FALSE	FALSE	FALSE	FALSE	FALSE	FALSE	FALSE	FALSE	FALSE	FALSE	FALSE	FALSE	FALSE	FALSE	FALSE	FALSE	FALSE	FALSE	FALSE	FALSE	FALSE	FALSE	FALSE	FALSE	FALSE	FALSE	FALSE	FALSE	FALSE	FALSE	FALSE	FALSE	FALSE	FALSE	FALSE	FALSE	FALSE	FALSE	FALSE	FALSE	FALSE	FALSE	FALSE	FALSE	FALSE	FALSE	FALSE
	FALSE	FALSE	FALSE	FALSE	FALSE	FALSE	FALSE	FALSE	FALSE	FALSE	FALSE	FALSE	FALSE	FALSE	FALSE	FALSE	FALSE	FALSE	FALSE	FALSE	FALSE	FALSE	FALSE	FALSE	FALSE	FALSE	FALSE	FALSE	FALSE	FALSE	FALSE	FALSE	FALSE	FALSE	FALSE	FALSE	FALSE	FALSE	FALSE	FALSE	FALSE	FALSE	FALSE	FALSE	FALSE	FALSE	FALSE	FALSE	FALSE
Part 14. Decide on fundamental name
Which calcic amphibole	ЛОЖЬЛОЖЬЛОЖЬЛОЖЬ	ЛОЖЬЛОЖЬЛОЖЬЛОЖЬ	ЛОЖЬЛОЖЬЛОЖЬЛОЖЬ	ЛОЖЬЛОЖЬЛОЖЬЛОЖЬ	ЛОЖЬЛОЖЬЛОЖЬЛОЖЬ	ЛОЖЬЛОЖЬsilicic edeniteЛОЖЬ	ЛОЖЬЛОЖЬsilicic edeniteЛОЖЬ	ЛОЖЬЛОЖЬsilicic edeniteЛОЖЬ	ЛОЖЬЛОЖЬЛОЖЬЛОЖЬ	ЛОЖЬЛОЖЬsilicic edeniteЛОЖЬ	ЛОЖЬЛОЖЬЛОЖЬЛОЖЬ	ЛОЖЬЛОЖЬsilicic edeniteЛОЖЬ	ЛОЖЬЛОЖЬsilicic edeniteЛОЖЬ	ЛОЖЬЛОЖЬsilicic edeniteЛОЖЬ	ЛОЖЬЛОЖЬsilicic edeniteЛОЖЬ	ЛОЖЬЛОЖЬЛОЖЬЛОЖЬ	ЛОЖЬЛОЖЬsilicic edeniteЛОЖЬ	ЛОЖЬЛОЖЬsilicic edeniteЛОЖЬ	ЛОЖЬsilicic edeniteЛОЖЬЛОЖЬ	ЛОЖЬЛОЖЬsilicic edeniteЛОЖЬ	ЛОЖЬЛОЖЬЛОЖЬЛОЖЬ	ЛОЖЬЛОЖЬЛОЖЬЛОЖЬ	ЛОЖЬЛОЖЬsilicic edeniteЛОЖЬ	ЛОЖЬЛОЖЬsilicic edeniteЛОЖЬ	ЛОЖЬЛОЖЬsilicic edeniteЛОЖЬ	ЛОЖЬЛОЖЬsilicic edeniteЛОЖЬ	ЛОЖЬЛОЖЬsilicic edeniteЛОЖЬ	ЛОЖЬsilicic edeniteЛОЖЬЛОЖЬ	ЛОЖЬЛОЖЬЛОЖЬЛОЖЬ	ЛОЖЬЛОЖЬsilicic edeniteЛОЖЬ	ЛОЖЬЛОЖЬsilicic edeniteЛОЖЬ	ЛОЖЬЛОЖЬsilicic edeniteЛОЖЬ	ЛОЖЬЛОЖЬsilicic edeniteЛОЖЬ	ЛОЖЬЛОЖЬsilicic edeniteЛОЖЬ	tremolitic hornblendeЛОЖЬЛОЖЬЛОЖЬ	ЛОЖЬЛОЖЬsilicic edeniteЛОЖЬ	ЛОЖЬЛОЖЬsilicic edeniteЛОЖЬ	ЛОЖЬЛОЖЬsilicic edeniteЛОЖЬ	ЛОЖЬЛОЖЬsilicic edeniteЛОЖЬ	ЛОЖЬЛОЖЬsilicic edeniteЛОЖЬ	ЛОЖЬЛОЖЬedeniteЛОЖЬ	ЛОЖЬЛОЖЬedeniteЛОЖЬ	ЛОЖЬЛОЖЬedeniteЛОЖЬ	ЛОЖЬЛОЖЬedeniteЛОЖЬ	ЛОЖЬЛОЖЬsilicic edeniteЛОЖЬ	ЛОЖЬЛОЖЬЛОЖЬЛОЖЬ	ЛОЖЬЛОЖЬedeniteЛОЖЬ	ЛОЖЬЛОЖЬedeniteЛОЖЬ	ЛОЖЬЛОЖЬedeniteЛОЖЬ
						silicic edenite	silicic edenite	silicic edenite		silicic edenite		silicic edenite	silicic edenite	silicic edenite	silicic edenite		silicic edenite	silicic edenite	silicic edenite	silicic edenite			silicic edenite	silicic edenite	silicic edenite	silicic edenite	silicic edenite	silicic edenite		silicic edenite	silicic edenite	silicic edenite	silicic edenite	silicic edenite	tremolitic hornblende	silicic edenite	silicic edenite	silicic edenite	silicic edenite	silicic edenite	edenite	edenite	edenite	edenite	silicic edenite		edenite	edenite	edenite
Which Fe-Mg-Mn amphibole	magnesio-anthophyllite	anthophyllite	magnesio-gedrite	dannemoreite	tirodite	FALSE	FALSE	FALSE	FALSE	FALSE	FALSE	FALSE	FALSE	FALSE	FALSE	FALSE	FALSE	FALSE	FALSE	FALSE	FALSE	FALSE	FALSE	FALSE	FALSE	FALSE	FALSE	FALSE	FALSE	FALSE	FALSE	FALSE	FALSE	FALSE	FALSE	FALSE	FALSE	FALSE	FALSE	FALSE	FALSE	FALSE	FALSE	FALSE	FALSE	FALSE	FALSE	FALSE	FALSE
Which Na-Ca amphibole	ЛОЖЬЛОЖЬ	ЛОЖЬЛОЖЬ	ЛОЖЬЛОЖЬ	ЛОЖЬЛОЖЬ	ЛОЖЬЛОЖЬ	ЛОЖЬЛОЖЬ	ЛОЖЬЛОЖЬ	ЛОЖЬЛОЖЬ	ЛОЖЬrichterite	ЛОЖЬЛОЖЬ	ЛОЖЬmagnesio-kataphorite	ЛОЖЬЛОЖЬ	ЛОЖЬЛОЖЬ	ЛОЖЬЛОЖЬ	ЛОЖЬЛОЖЬ	ЛОЖЬrichterite	ЛОЖЬЛОЖЬ	ЛОЖЬЛОЖЬ	ЛОЖЬЛОЖЬ	ЛОЖЬЛОЖЬ	ЛОЖЬmagnesio-kataphorite	ЛОЖЬmagnesio-kataphorite	ЛОЖЬЛОЖЬ	ЛОЖЬЛОЖЬ	ЛОЖЬЛОЖЬ	ЛОЖЬЛОЖЬ	ЛОЖЬЛОЖЬ	ЛОЖЬЛОЖЬ	ЛОЖЬmagnesio-kataphorite	ЛОЖЬЛОЖЬ	ЛОЖЬЛОЖЬ	ЛОЖЬЛОЖЬ	ЛОЖЬЛОЖЬ	ЛОЖЬЛОЖЬ	ЛОЖЬЛОЖЬ	ЛОЖЬЛОЖЬ	ЛОЖЬЛОЖЬ	ЛОЖЬЛОЖЬ	ЛОЖЬЛОЖЬ	ЛОЖЬЛОЖЬ	ЛОЖЬЛОЖЬ	ЛОЖЬЛОЖЬ	ЛОЖЬЛОЖЬ	ЛОЖЬЛОЖЬ	ЛОЖЬЛОЖЬ	ЛОЖЬmagnesio-kataphorite	ЛОЖЬЛОЖЬ	ЛОЖЬЛОЖЬ	ЛОЖЬЛОЖЬ
									richterite		magnesio-kataphorite					richterite					magnesio-kataphorite	magnesio-kataphorite							magnesio-kataphorite																	magnesio-kataphorite
Which alkali amphibole	ЛОЖЬЛОЖЬЛОЖЬЛОЖЬ	ЛОЖЬЛОЖЬЛОЖЬЛОЖЬ	ЛОЖЬЛОЖЬЛОЖЬЛОЖЬ	ЛОЖЬЛОЖЬЛОЖЬЛОЖЬ	ЛОЖЬЛОЖЬЛОЖЬЛОЖЬ	ЛОЖЬЛОЖЬЛОЖЬЛОЖЬ	ЛОЖЬЛОЖЬЛОЖЬЛОЖЬ	ЛОЖЬЛОЖЬЛОЖЬЛОЖЬ	ЛОЖЬЛОЖЬЛОЖЬЛОЖЬ	ЛОЖЬЛОЖЬЛОЖЬЛОЖЬ	ЛОЖЬЛОЖЬЛОЖЬЛОЖЬ	ЛОЖЬЛОЖЬЛОЖЬЛОЖЬ	ЛОЖЬЛОЖЬЛОЖЬЛОЖЬ	ЛОЖЬЛОЖЬЛОЖЬЛОЖЬ	ЛОЖЬЛОЖЬЛОЖЬЛОЖЬ	ЛОЖЬЛОЖЬЛОЖЬЛОЖЬ	ЛОЖЬЛОЖЬЛОЖЬЛОЖЬ	ЛОЖЬЛОЖЬЛОЖЬЛОЖЬ	ЛОЖЬЛОЖЬЛОЖЬЛОЖЬ	ЛОЖЬЛОЖЬЛОЖЬЛОЖЬ	ЛОЖЬЛОЖЬЛОЖЬЛОЖЬ	ЛОЖЬЛОЖЬЛОЖЬЛОЖЬ	ЛОЖЬЛОЖЬЛОЖЬЛОЖЬ	ЛОЖЬЛОЖЬЛОЖЬЛОЖЬ	ЛОЖЬЛОЖЬЛОЖЬЛОЖЬ	ЛОЖЬЛОЖЬЛОЖЬЛОЖЬ	ЛОЖЬЛОЖЬЛОЖЬЛОЖЬ	ЛОЖЬЛОЖЬЛОЖЬЛОЖЬ	ЛОЖЬЛОЖЬЛОЖЬЛОЖЬ	ЛОЖЬЛОЖЬЛОЖЬЛОЖЬ	ЛОЖЬЛОЖЬЛОЖЬЛОЖЬ	ЛОЖЬЛОЖЬЛОЖЬЛОЖЬ	ЛОЖЬЛОЖЬЛОЖЬЛОЖЬ	ЛОЖЬЛОЖЬЛОЖЬЛОЖЬ	ЛОЖЬЛОЖЬЛОЖЬЛОЖЬ	ЛОЖЬЛОЖЬЛОЖЬЛОЖЬ	ЛОЖЬЛОЖЬЛОЖЬЛОЖЬ	ЛОЖЬЛОЖЬЛОЖЬЛОЖЬ	ЛОЖЬЛОЖЬЛОЖЬЛОЖЬ	ЛОЖЬЛОЖЬЛОЖЬЛОЖЬ	ЛОЖЬЛОЖЬЛОЖЬЛОЖЬ	ЛОЖЬЛОЖЬЛОЖЬЛОЖЬ	ЛОЖЬЛОЖЬЛОЖЬЛОЖЬ	ЛОЖЬЛОЖЬЛОЖЬЛОЖЬ	ЛОЖЬЛОЖЬЛОЖЬЛОЖЬ	ЛОЖЬЛОЖЬЛОЖЬЛОЖЬ	ЛОЖЬЛОЖЬЛОЖЬЛОЖЬ	ЛОЖЬЛОЖЬЛОЖЬЛОЖЬ	ЛОЖЬЛОЖЬЛОЖЬЛОЖЬ
	magnesio-anthophyllite	anthophyllite	magnesio-gedrite	dannemoreite	tirodite	silicic edeniteЛОЖЬ	silicic edeniteЛОЖЬ	silicic edeniteЛОЖЬ	ЛОЖЬrichterite	silicic edeniteЛОЖЬ	ЛОЖЬmagnesio-kataphorite	silicic edeniteЛОЖЬ	silicic edeniteЛОЖЬ	silicic edeniteЛОЖЬ	silicic edeniteЛОЖЬ	ЛОЖЬrichterite	silicic edeniteЛОЖЬ	silicic edeniteЛОЖЬ	silicic edeniteЛОЖЬ	silicic edeniteЛОЖЬ	ЛОЖЬmagnesio-kataphorite	ЛОЖЬmagnesio-kataphorite	silicic edeniteЛОЖЬ	silicic edeniteЛОЖЬ	silicic edeniteЛОЖЬ	silicic edeniteЛОЖЬ	silicic edeniteЛОЖЬ	silicic edeniteЛОЖЬ	ЛОЖЬmagnesio-kataphorite	silicic edeniteЛОЖЬ	silicic edeniteЛОЖЬ	silicic edeniteЛОЖЬ	silicic edeniteЛОЖЬ	silicic edeniteЛОЖЬ	tremolitic hornblendeЛОЖЬ	silicic edeniteЛОЖЬ	silicic edeniteЛОЖЬ	silicic edeniteЛОЖЬ	silicic edeniteЛОЖЬ	silicic edeniteЛОЖЬ	edeniteЛОЖЬ	edeniteЛОЖЬ	edeniteЛОЖЬ	edeniteЛОЖЬ	silicic edeniteЛОЖЬ	ЛОЖЬmagnesio-kataphorite	edeniteЛОЖЬ	edeniteЛОЖЬ	edeniteЛОЖЬ
Which amphibole	magnesio-anthophyllite	anthophyllite	magnesio-gedrite	dannemoreite	tirodite	silicic edenite	silicic edenite	silicic edenite	richterite	silicic edenite	magnesio-kataphorite	silicic edenite	silicic edenite	silicic edenite	silicic edenite	richterite	silicic edenite	silicic edenite	silicic edenite	silicic edenite	magnesio-kataphorite	magnesio-kataphorite	silicic edenite	silicic edenite	silicic edenite	silicic edenite	silicic edenite	silicic edenite	magnesio-kataphorite	silicic edenite	silicic edenite	silicic edenite	silicic edenite	silicic edenite	tremolitic hornblende	silicic edenite	silicic edenite	silicic edenite	silicic edenite	silicic edenite	edenite	edenite	edenite	edenite	silicic edenite	magnesio-kataphorite	edenite	edenite	edenite
Part 15. Check for prefixes
chlor-	FALSE	FALSE	FALSE	FALSE	FALSE	FALSE	FALSE	FALSE	FALSE	FALSE	FALSE	FALSE	FALSE	FALSE	FALSE	FALSE	FALSE	FALSE	FALSE	FALSE	FALSE	FALSE	FALSE	FALSE	FALSE	FALSE	FALSE	FALSE	FALSE	FALSE	FALSE	FALSE	FALSE	FALSE	FALSE	FALSE	FALSE	FALSE	FALSE	FALSE	FALSE	FALSE	FALSE	FALSE	FALSE	FALSE	FALSE	FALSE	FALSE
chromium-	FALSE	FALSE	FALSE	FALSE	FALSE	FALSE	FALSE	FALSE	FALSE	FALSE	FALSE	FALSE	FALSE	FALSE	FALSE	FALSE	FALSE	FALSE	FALSE	FALSE	FALSE	FALSE	FALSE	FALSE	FALSE	FALSE	FALSE	FALSE	FALSE	FALSE	FALSE	FALSE	FALSE	FALSE	FALSE	FALSE	FALSE	FALSE	FALSE	FALSE	FALSE	FALSE	FALSE	FALSE	FALSE	FALSE	FALSE	FALSE	FALSE
chromian-	FALSE	FALSE	FALSE	FALSE	FALSE	FALSE	FALSE	FALSE	FALSE	FALSE	FALSE	FALSE	FALSE	FALSE	FALSE	FALSE	FALSE	FALSE	FALSE	FALSE	FALSE	FALSE	FALSE	FALSE	FALSE	FALSE	FALSE	FALSE	FALSE	FALSE	FALSE	FALSE	FALSE	FALSE	FALSE	FALSE	FALSE	FALSE	FALSE	FALSE	FALSE	FALSE	FALSE	FALSE	FALSE	FALSE	FALSE	FALSE	FALSE
check for hastingsites etc.	FALSE	FALSE	FALSE	FALSE	FALSE	FALSE	FALSE	FALSE	FALSE	FALSE	FALSE	FALSE	FALSE	FALSE	FALSE	FALSE	FALSE	FALSE	FALSE	FALSE	FALSE	FALSE	FALSE	FALSE	FALSE	FALSE	FALSE	FALSE	FALSE	FALSE	FALSE	FALSE	FALSE	FALSE	FALSE	FALSE	FALSE	FALSE	FALSE	FALSE	FALSE	FALSE	FALSE	FALSE	FALSE	FALSE	FALSE	FALSE	FALSE
ferri-	FALSE	FALSE	FALSE	FALSE	FALSE	FALSE	FALSE	FALSE	FALSE	FALSE	FALSE	FALSE	FALSE	FALSE	FALSE	FALSE	FALSE	FALSE	FALSE	FALSE	FALSE	FALSE	FALSE	FALSE	FALSE	FALSE	FALSE	FALSE	FALSE	FALSE	FALSE	FALSE	FALSE	FALSE	FALSE	FALSE	FALSE	FALSE	FALSE	FALSE	FALSE	FALSE	FALSE	FALSE	FALSE	FALSE	FALSE	FALSE	FALSE
ferrian-	FALSE	FALSE	FALSE	FALSE	FALSE	FALSE	FALSE	FALSE	FALSE	FALSE	FALSE	FALSE	FALSE	FALSE	FALSE	FALSE	FALSE	FALSE	FALSE	FALSE	FALSE	FALSE	FALSE	FALSE	FALSE	FALSE	FALSE	FALSE	FALSE	FALSE	FALSE	FALSE	FALSE	FALSE	ferrian-	FALSE	FALSE	FALSE	FALSE	FALSE	FALSE	FALSE	FALSE	FALSE	FALSE	ferrian-	FALSE	FALSE	FALSE
fluor-	FALSE	FALSE	FALSE	FALSE	FALSE	FALSE	FALSE	FALSE	FALSE	FALSE	FALSE	FALSE	FALSE	FALSE	FALSE	FALSE	FALSE	FALSE	FALSE	FALSE	FALSE	FALSE	FALSE	FALSE	FALSE	FALSE	FALSE	FALSE	FALSE	FALSE	FALSE	FALSE	FALSE	FALSE	FALSE	FALSE	FALSE	FALSE	FALSE	FALSE	FALSE	FALSE	FALSE	FALSE	FALSE	FALSE	FALSE	FALSE	FALSE
hydro-	FALSE	FALSE	FALSE	FALSE	FALSE	FALSE	FALSE	FALSE	FALSE	FALSE	FALSE	FALSE	FALSE	FALSE	FALSE	FALSE	FALSE	FALSE	FALSE	FALSE	FALSE	FALSE	FALSE	FALSE	FALSE	FALSE	FALSE	FALSE	FALSE	FALSE	FALSE	FALSE	FALSE	FALSE	FALSE	FALSE	FALSE	FALSE	FALSE	FALSE	FALSE	FALSE	FALSE	FALSE	FALSE	FALSE	FALSE	FALSE	FALSE
lithian-	FALSE	FALSE	FALSE	FALSE	FALSE	FALSE	FALSE	FALSE	FALSE	FALSE	FALSE	FALSE	FALSE	FALSE	FALSE	FALSE	FALSE	FALSE	FALSE	FALSE	FALSE	FALSE	FALSE	FALSE	FALSE	FALSE	FALSE	FALSE	FALSE	FALSE	FALSE	FALSE	FALSE	FALSE	FALSE	FALSE	FALSE	FALSE	FALSE	FALSE	FALSE	FALSE	FALSE	FALSE	FALSE	FALSE	FALSE	FALSE	FALSE
manganese-	FALSE	FALSE	FALSE	FALSE	FALSE	FALSE	FALSE	FALSE	FALSE	FALSE	FALSE	FALSE	FALSE	FALSE	FALSE	FALSE	FALSE	FALSE	FALSE	FALSE	FALSE	FALSE	FALSE	FALSE	FALSE	FALSE	FALSE	FALSE	FALSE	FALSE	FALSE	FALSE	FALSE	FALSE	FALSE	FALSE	FALSE	FALSE	FALSE	FALSE	FALSE	FALSE	FALSE	FALSE	FALSE	FALSE	FALSE	FALSE	FALSE
manganoan-	FALSE	FALSE	FALSE	FALSE	FALSE	FALSE	FALSE	FALSE	FALSE	FALSE	FALSE	FALSE	FALSE	FALSE	FALSE	FALSE	FALSE	FALSE	FALSE	FALSE	FALSE	FALSE	FALSE	FALSE	FALSE	FALSE	FALSE	FALSE	FALSE	FALSE	FALSE	FALSE	FALSE	FALSE	FALSE	FALSE	FALSE	FALSE	FALSE	FALSE	FALSE	FALSE	FALSE	FALSE	FALSE	FALSE	FALSE	FALSE	FALSE
plumbian-	FALSE	FALSE	FALSE	FALSE	FALSE	FALSE	FALSE	FALSE	FALSE	FALSE	FALSE	FALSE	FALSE	FALSE	FALSE	FALSE	FALSE	FALSE	FALSE	FALSE	FALSE	FALSE	FALSE	FALSE	FALSE	FALSE	FALSE	FALSE	FALSE	FALSE	FALSE	FALSE	FALSE	FALSE	FALSE	FALSE	FALSE	FALSE	FALSE	FALSE	FALSE	FALSE	FALSE	FALSE	FALSE	FALSE	FALSE	FALSE	FALSE
titanium-	FALSE	FALSE	FALSE	FALSE	FALSE	FALSE	FALSE	FALSE	FALSE	FALSE	FALSE	FALSE	FALSE	FALSE	FALSE	FALSE	FALSE	FALSE	FALSE	FALSE	FALSE	FALSE	FALSE	FALSE	FALSE	FALSE	FALSE	FALSE	FALSE	FALSE	FALSE	FALSE	FALSE	FALSE	FALSE	FALSE	FALSE	FALSE	FALSE	FALSE	FALSE	FALSE	FALSE	FALSE	FALSE	FALSE	FALSE	FALSE	FALSE
titanian-	FALSE	FALSE	FALSE	FALSE	FALSE	FALSE	FALSE	FALSE	FALSE	FALSE	FALSE	FALSE	FALSE	FALSE	FALSE	FALSE	FALSE	FALSE	FALSE	FALSE	FALSE	FALSE	FALSE	FALSE	FALSE	FALSE	FALSE	FALSE	FALSE	FALSE	FALSE	FALSE	FALSE	FALSE	FALSE	FALSE	FALSE	FALSE	FALSE	FALSE	FALSE	FALSE	FALSE	FALSE	FALSE	FALSE	FALSE	FALSE	FALSE
potassium-	FALSE	FALSE	FALSE	FALSE	FALSE	FALSE	FALSE	FALSE	FALSE	FALSE	FALSE	FALSE	FALSE	FALSE	FALSE	FALSE	FALSE	FALSE	FALSE	FALSE	FALSE	FALSE	FALSE	FALSE	FALSE	FALSE	FALSE	FALSE	FALSE	FALSE	FALSE	FALSE	FALSE	FALSE	FALSE	FALSE	FALSE	FALSE	FALSE	FALSE	FALSE	FALSE	FALSE	FALSE	FALSE	FALSE	FALSE	FALSE	FALSE
potassian-	FALSE	FALSE	FALSE	FALSE	FALSE	FALSE	FALSE	FALSE	potassian-	FALSE	FALSE	FALSE	FALSE	FALSE	FALSE	FALSE	FALSE	FALSE	FALSE	FALSE	FALSE	FALSE	FALSE	FALSE	FALSE	FALSE	FALSE	FALSE	FALSE	FALSE	FALSE	FALSE	FALSE	FALSE	FALSE	FALSE	FALSE	FALSE	FALSE	FALSE	FALSE	FALSE	FALSE	FALSE	FALSE	FALSE	FALSE	FALSE	FALSE
subsilicic-	FALSE	FALSE	FALSE	FALSE	FALSE	FALSE	FALSE	FALSE	FALSE	FALSE	FALSE	FALSE	FALSE	FALSE	FALSE	FALSE	FALSE	FALSE	FALSE	FALSE	FALSE	FALSE	FALSE	FALSE	FALSE	FALSE	FALSE	FALSE	FALSE	FALSE	FALSE	FALSE	FALSE	FALSE	FALSE	FALSE	FALSE	FALSE	FALSE	FALSE	FALSE	FALSE	FALSE	FALSE	FALSE	FALSE	FALSE	FALSE	FALSE
zinc-	FALSE	FALSE	FALSE	FALSE	FALSE	FALSE	FALSE	FALSE	FALSE	FALSE	FALSE	FALSE	FALSE	FALSE	FALSE	FALSE	FALSE	FALSE	FALSE	FALSE	FALSE	FALSE	FALSE	FALSE	FALSE	FALSE	FALSE	FALSE	FALSE	FALSE	FALSE	FALSE	FALSE	FALSE	FALSE	FALSE	FALSE	FALSE	FALSE	FALSE	FALSE	FALSE	FALSE	FALSE	FALSE	FALSE	FALSE	FALSE	FALSE
zincian-	FALSE	FALSE	FALSE	FALSE	FALSE	FALSE	FALSE	FALSE	FALSE	FALSE	FALSE	FALSE	FALSE	FALSE	FALSE	FALSE	FALSE	FALSE	FALSE	FALSE	FALSE	FALSE	FALSE	FALSE	FALSE	FALSE	FALSE	FALSE	FALSE	FALSE	FALSE	FALSE	FALSE	FALSE	FALSE	FALSE	FALSE	FALSE	FALSE	FALSE	FALSE	FALSE	FALSE	FALSE	FALSE	FALSE	FALSE	FALSE	FALSE
nickeloan-	FALSE	FALSE	FALSE	FALSE	FALSE	FALSE	FALSE	FALSE	FALSE	FALSE	FALSE	FALSE	FALSE	FALSE	FALSE	FALSE	FALSE	FALSE	FALSE	FALSE	FALSE	FALSE	FALSE	FALSE	FALSE	FALSE	FALSE	FALSE	FALSE	FALSE	FALSE	FALSE	FALSE	FALSE	FALSE	FALSE	FALSE	FALSE	FALSE	FALSE	FALSE	FALSE	FALSE	FALSE	FALSE	FALSE	FALSE	FALSE	FALSE
barian-	FALSE	FALSE	FALSE	FALSE	FALSE	FALSE	FALSE	FALSE	FALSE	FALSE	FALSE	FALSE	FALSE	FALSE	FALSE	FALSE	FALSE	FALSE	FALSE	FALSE	FALSE	FALSE	FALSE	FALSE	FALSE	FALSE	FALSE	FALSE	FALSE	FALSE	FALSE	FALSE	FALSE	FALSE	FALSE	FALSE	FALSE	FALSE	FALSE	FALSE	FALSE	FALSE	FALSE	FALSE	FALSE	FALSE	FALSE	FALSE	FALSE
strontian-	FALSE	FALSE	FALSE	FALSE	FALSE	FALSE	FALSE	FALSE	FALSE	FALSE	FALSE	FALSE	FALSE	FALSE	FALSE	FALSE	FALSE	FALSE	FALSE	FALSE	FALSE	FALSE	FALSE	FALSE	FALSE	FALSE	FALSE	FALSE	FALSE	FALSE	FALSE	FALSE	FALSE	FALSE	FALSE	FALSE	FALSE	FALSE	FALSE	FALSE	FALSE	FALSE	FALSE	FALSE	FALSE	FALSE	FALSE	FALSE	FALSE
alumino	FALSE	FALSE	FALSE	FALSE	FALSE	FALSE	FALSE	FALSE	FALSE	FALSE	FALSE	FALSE	FALSE	FALSE	FALSE	FALSE	FALSE	FALSE	FALSE	FALSE	FALSE	FALSE	FALSE	FALSE	FALSE	FALSE	FALSE	FALSE	FALSE	FALSE	FALSE	FALSE	FALSE	FALSE	FALSE	FALSE	FALSE	FALSE	FALSE	FALSE	FALSE	FALSE	FALSE	FALSE	FALSE	FALSE	FALSE	FALSE	FALSE
alumino	FALSE	FALSE	FALSE	FALSE	FALSE	FALSE	FALSE	FALSE	FALSE	FALSE	FALSE	FALSE	FALSE	FALSE	FALSE	FALSE	FALSE	FALSE	FALSE	FALSE	FALSE	FALSE	FALSE	FALSE	FALSE	FALSE	FALSE	FALSE	FALSE	FALSE	FALSE	FALSE	FALSE	FALSE	FALSE	FALSE	FALSE	FALSE	FALSE	FALSE	FALSE	FALSE	FALSE	FALSE	FALSE	FALSE	FALSE	FALSE	FALSE
alumino	FALSE	FALSE	FALSE	FALSE	FALSE	FALSE	FALSE	FALSE	FALSE	FALSE	FALSE	FALSE	FALSE	FALSE	FALSE	FALSE	FALSE	FALSE	FALSE	FALSE	FALSE	FALSE	FALSE	FALSE	FALSE	FALSE	FALSE	FALSE	FALSE	FALSE	FALSE	FALSE	FALSE	FALSE	FALSE	FALSE	FALSE	FALSE	FALSE	FALSE	FALSE	FALSE	FALSE	FALSE	FALSE	FALSE	FALSE	FALSE	FALSE
sodium	FALSE	FALSE	FALSE	FALSE	FALSE	FALSE	FALSE	FALSE	FALSE	FALSE	FALSE	FALSE	FALSE	FALSE	FALSE	FALSE	FALSE	FALSE	FALSE	FALSE	FALSE	FALSE	FALSE	FALSE	FALSE	FALSE	FALSE	FALSE	FALSE	FALSE	FALSE	FALSE	FALSE	FALSE	FALSE	FALSE	FALSE	FALSE	FALSE	FALSE	FALSE	FALSE	FALSE	FALSE	FALSE	FALSE	FALSE	FALSE	FALSE
sodium	FALSE	FALSE	FALSE	FALSE	FALSE	FALSE	FALSE	FALSE	FALSE	FALSE	FALSE	FALSE	FALSE	FALSE	FALSE	FALSE	FALSE	FALSE	FALSE	FALSE	FALSE	FALSE	FALSE	FALSE	FALSE	FALSE	FALSE	FALSE	FALSE	FALSE	FALSE	FALSE	FALSE	FALSE	FALSE	FALSE	FALSE	FALSE	FALSE	FALSE	FALSE	FALSE	FALSE	FALSE	FALSE	FALSE	FALSE	FALSE	FALSE
sodian	FALSE	FALSE	sodian	FALSE	FALSE	FALSE	FALSE	FALSE	FALSE	FALSE	FALSE	FALSE	FALSE	FALSE	FALSE	FALSE	FALSE	FALSE	FALSE	FALSE	FALSE	FALSE	FALSE	FALSE	FALSE	FALSE	FALSE	FALSE	FALSE	FALSE	FALSE	FALSE	FALSE	FALSE	FALSE	FALSE	FALSE	FALSE	FALSE	FALSE	FALSE	FALSE	FALSE	FALSE	FALSE	FALSE	FALSE	FALSE	FALSE
sodian	FALSE	FALSE	FALSE	FALSE	FALSE	sodian	sodian	sodian	FALSE	sodian	FALSE	FALSE	sodian	sodian	FALSE	FALSE	sodian	sodian	sodian	sodian	FALSE	FALSE	sodian	sodian	sodian	sodian	sodian	sodian	FALSE	sodian	sodian	sodian	sodian	sodian	FALSE	sodian	sodian	sodian	sodian	sodian	sodian	sodian	sodian	sodian	sodian	FALSE	sodian	FALSE	sodian
subcalcic	FALSE	FALSE	FALSE	FALSE	FALSE	subcalcic	subcalcic	subcalcic	FALSE	subcalcic	FALSE	subcalcic	subcalcic	subcalcic	subcalcic	FALSE	subcalcic	subcalcic	subcalcic	subcalcic	FALSE	FALSE	subcalcic	subcalcic	subcalcic	subcalcic	subcalcic	subcalcic	FALSE	subcalcic	subcalcic	FALSE	subcalcic	subcalcic	FALSE	subcalcic	subcalcic	subcalcic	subcalcic	subcalcic	subcalcic	subcalcic	subcalcic	FALSE	subcalcic	FALSE	subcalcic	FALSE	subcalcic
calcian	FALSE	FALSE	FALSE	FALSE	FALSE	FALSE	FALSE	FALSE	FALSE	FALSE	FALSE	FALSE	FALSE	FALSE	FALSE	FALSE	FALSE	FALSE	FALSE	FALSE	FALSE	FALSE	FALSE	FALSE	FALSE	FALSE	FALSE	FALSE	FALSE	FALSE	FALSE	FALSE	FALSE	FALSE	FALSE	FALSE	FALSE	FALSE	FALSE	FALSE	FALSE	FALSE	FALSE	FALSE	FALSE	FALSE	FALSE	FALSE	FALSE
calcian	FALSE	FALSE	FALSE	FALSE	FALSE	FALSE	FALSE	FALSE	FALSE	FALSE	FALSE	FALSE	FALSE	FALSE	FALSE	FALSE	FALSE	FALSE	FALSE	FALSE	FALSE	FALSE	FALSE	FALSE	FALSE	FALSE	FALSE	FALSE	FALSE	FALSE	FALSE	FALSE	FALSE	FALSE	FALSE	FALSE	FALSE	FALSE	FALSE	FALSE	FALSE	FALSE	FALSE	FALSE	FALSE	FALSE	FALSE	FALSE	FALSE
silica-poor	FALSE	FALSE	FALSE	FALSE	FALSE	FALSE	FALSE	FALSE	FALSE	FALSE	FALSE	FALSE	FALSE	FALSE	FALSE	FALSE	FALSE	FALSE	FALSE	FALSE	FALSE	FALSE	FALSE	FALSE	FALSE	FALSE	FALSE	FALSE	FALSE	FALSE	FALSE	FALSE	FALSE	FALSE	FALSE	FALSE	FALSE	FALSE	FALSE	FALSE	FALSE	FALSE	FALSE	FALSE	FALSE	FALSE	FALSE	FALSE	FALSE
Part 16. Select TRUE prefixes and tidy	ЛОЖЬЛОЖЬЛОЖЬЛОЖЬЛОЖЬЛОЖЬЛОЖЬЛОЖЬЛОЖЬЛОЖЬЛОЖЬЛОЖЬЛОЖЬЛОЖЬЛОЖЬЛОЖЬЛОЖЬЛОЖЬЛОЖЬЛОЖЬ	ЛОЖЬЛОЖЬЛОЖЬЛОЖЬЛОЖЬЛОЖЬЛОЖЬЛОЖЬЛОЖЬЛОЖЬЛОЖЬЛОЖЬЛОЖЬЛОЖЬЛОЖЬЛОЖЬЛОЖЬЛОЖЬЛОЖЬЛОЖЬ	ЛОЖЬЛОЖЬЛОЖЬЛОЖЬЛОЖЬЛОЖЬЛОЖЬЛОЖЬЛОЖЬЛОЖЬЛОЖЬЛОЖЬЛОЖЬЛОЖЬЛОЖЬЛОЖЬЛОЖЬЛОЖЬЛОЖЬЛОЖЬ	ЛОЖЬЛОЖЬЛОЖЬЛОЖЬЛОЖЬЛОЖЬЛОЖЬЛОЖЬЛОЖЬЛОЖЬЛОЖЬЛОЖЬЛОЖЬЛОЖЬЛОЖЬЛОЖЬЛОЖЬЛОЖЬЛОЖЬЛОЖЬ	ЛОЖЬЛОЖЬЛОЖЬЛОЖЬЛОЖЬЛОЖЬЛОЖЬЛОЖЬЛОЖЬЛОЖЬЛОЖЬЛОЖЬЛОЖЬЛОЖЬЛОЖЬЛОЖЬЛОЖЬЛОЖЬЛОЖЬЛОЖЬ	ЛОЖЬЛОЖЬЛОЖЬЛОЖЬЛОЖЬЛОЖЬЛОЖЬЛОЖЬЛОЖЬЛОЖЬЛОЖЬЛОЖЬЛОЖЬЛОЖЬЛОЖЬЛОЖЬЛОЖЬЛОЖЬЛОЖЬЛОЖЬ	ЛОЖЬЛОЖЬЛОЖЬЛОЖЬЛОЖЬЛОЖЬЛОЖЬЛОЖЬЛОЖЬЛОЖЬЛОЖЬЛОЖЬЛОЖЬЛОЖЬЛОЖЬЛОЖЬЛОЖЬЛОЖЬЛОЖЬЛОЖЬ	ЛОЖЬЛОЖЬЛОЖЬЛОЖЬЛОЖЬЛОЖЬЛОЖЬЛОЖЬЛОЖЬЛОЖЬЛОЖЬЛОЖЬЛОЖЬЛОЖЬЛОЖЬЛОЖЬЛОЖЬЛОЖЬЛОЖЬЛОЖЬ	ЛОЖЬЛОЖЬЛОЖЬЛОЖЬЛОЖЬЛОЖЬЛОЖЬЛОЖЬЛОЖЬЛОЖЬЛОЖЬЛОЖЬЛОЖЬЛОЖЬЛОЖЬЛОЖЬpotassian-ЛОЖЬЛОЖЬЛОЖЬ	ЛОЖЬЛОЖЬЛОЖЬЛОЖЬЛОЖЬЛОЖЬЛОЖЬЛОЖЬЛОЖЬЛОЖЬЛОЖЬЛОЖЬЛОЖЬЛОЖЬЛОЖЬЛОЖЬЛОЖЬЛОЖЬЛОЖЬЛОЖЬ	ЛОЖЬЛОЖЬЛОЖЬЛОЖЬЛОЖЬЛОЖЬЛОЖЬЛОЖЬЛОЖЬЛОЖЬЛОЖЬЛОЖЬЛОЖЬЛОЖЬЛОЖЬЛОЖЬЛОЖЬЛОЖЬЛОЖЬЛОЖЬ	ЛОЖЬЛОЖЬЛОЖЬЛОЖЬЛОЖЬЛОЖЬЛОЖЬЛОЖЬЛОЖЬЛОЖЬЛОЖЬЛОЖЬЛОЖЬЛОЖЬЛОЖЬЛОЖЬЛОЖЬЛОЖЬЛОЖЬЛОЖЬ	ЛОЖЬЛОЖЬЛОЖЬЛОЖЬЛОЖЬЛОЖЬЛОЖЬЛОЖЬЛОЖЬЛОЖЬЛОЖЬЛОЖЬЛОЖЬЛОЖЬЛОЖЬЛОЖЬЛОЖЬЛОЖЬЛОЖЬЛОЖЬ	ЛОЖЬЛОЖЬЛОЖЬЛОЖЬЛОЖЬЛОЖЬЛОЖЬЛОЖЬЛОЖЬЛОЖЬЛОЖЬЛОЖЬЛОЖЬЛОЖЬЛОЖЬЛОЖЬЛОЖЬЛОЖЬЛОЖЬЛОЖЬ	ЛОЖЬЛОЖЬЛОЖЬЛОЖЬЛОЖЬЛОЖЬЛОЖЬЛОЖЬЛОЖЬЛОЖЬЛОЖЬЛОЖЬЛОЖЬЛОЖЬЛОЖЬЛОЖЬЛОЖЬЛОЖЬЛОЖЬЛОЖЬ	ЛОЖЬЛОЖЬЛОЖЬЛОЖЬЛОЖЬЛОЖЬЛОЖЬЛОЖЬЛОЖЬЛОЖЬЛОЖЬЛОЖЬЛОЖЬЛОЖЬЛОЖЬЛОЖЬЛОЖЬЛОЖЬЛОЖЬЛОЖЬ	ЛОЖЬЛОЖЬЛОЖЬЛОЖЬЛОЖЬЛОЖЬЛОЖЬЛОЖЬЛОЖЬЛОЖЬЛОЖЬЛОЖЬЛОЖЬЛОЖЬЛОЖЬЛОЖЬЛОЖЬЛОЖЬЛОЖЬЛОЖЬ	ЛОЖЬЛОЖЬЛОЖЬЛОЖЬЛОЖЬЛОЖЬЛОЖЬЛОЖЬЛОЖЬЛОЖЬЛОЖЬЛОЖЬЛОЖЬЛОЖЬЛОЖЬЛОЖЬЛОЖЬЛОЖЬЛОЖЬЛОЖЬ	ЛОЖЬЛОЖЬЛОЖЬЛОЖЬЛОЖЬЛОЖЬЛОЖЬЛОЖЬЛОЖЬЛОЖЬЛОЖЬЛОЖЬЛОЖЬЛОЖЬЛОЖЬЛОЖЬЛОЖЬЛОЖЬЛОЖЬЛОЖЬ	ЛОЖЬЛОЖЬЛОЖЬЛОЖЬЛОЖЬЛОЖЬЛОЖЬЛОЖЬЛОЖЬЛОЖЬЛОЖЬЛОЖЬЛОЖЬЛОЖЬЛОЖЬЛОЖЬЛОЖЬЛОЖЬЛОЖЬЛОЖЬ	ЛОЖЬЛОЖЬЛОЖЬЛОЖЬЛОЖЬЛОЖЬЛОЖЬЛОЖЬЛОЖЬЛОЖЬЛОЖЬЛОЖЬЛОЖЬЛОЖЬЛОЖЬЛОЖЬЛОЖЬЛОЖЬЛОЖЬЛОЖЬ	ЛОЖЬЛОЖЬЛОЖЬЛОЖЬЛОЖЬЛОЖЬЛОЖЬЛОЖЬЛОЖЬЛОЖЬЛОЖЬЛОЖЬЛОЖЬЛОЖЬЛОЖЬЛОЖЬЛОЖЬЛОЖЬЛОЖЬЛОЖЬ	ЛОЖЬЛОЖЬЛОЖЬЛОЖЬЛОЖЬЛОЖЬЛОЖЬЛОЖЬЛОЖЬЛОЖЬЛОЖЬЛОЖЬЛОЖЬЛОЖЬЛОЖЬЛОЖЬЛОЖЬЛОЖЬЛОЖЬЛОЖЬ	ЛОЖЬЛОЖЬЛОЖЬЛОЖЬЛОЖЬЛОЖЬЛОЖЬЛОЖЬЛОЖЬЛОЖЬЛОЖЬЛОЖЬЛОЖЬЛОЖЬЛОЖЬЛОЖЬЛОЖЬЛОЖЬЛОЖЬЛОЖЬ	ЛОЖЬЛОЖЬЛОЖЬЛОЖЬЛОЖЬЛОЖЬЛОЖЬЛОЖЬЛОЖЬЛОЖЬЛОЖЬЛОЖЬЛОЖЬЛОЖЬЛОЖЬЛОЖЬЛОЖЬЛОЖЬЛОЖЬЛОЖЬ	ЛОЖЬЛОЖЬЛОЖЬЛОЖЬЛОЖЬЛОЖЬЛОЖЬЛОЖЬЛОЖЬЛОЖЬЛОЖЬЛОЖЬЛОЖЬЛОЖЬЛОЖЬЛОЖЬЛОЖЬЛОЖЬЛОЖЬЛОЖЬ	ЛОЖЬЛОЖЬЛОЖЬЛОЖЬЛОЖЬЛОЖЬЛОЖЬЛОЖЬЛОЖЬЛОЖЬЛОЖЬЛОЖЬЛОЖЬЛОЖЬЛОЖЬЛОЖЬЛОЖЬЛОЖЬЛОЖЬЛОЖЬ	ЛОЖЬЛОЖЬЛОЖЬЛОЖЬЛОЖЬЛОЖЬЛОЖЬЛОЖЬЛОЖЬЛОЖЬЛОЖЬЛОЖЬЛОЖЬЛОЖЬЛОЖЬЛОЖЬЛОЖЬЛОЖЬЛОЖЬЛОЖЬ	ЛОЖЬЛОЖЬЛОЖЬЛОЖЬЛОЖЬЛОЖЬЛОЖЬЛОЖЬЛОЖЬЛОЖЬЛОЖЬЛОЖЬЛОЖЬЛОЖЬЛОЖЬЛОЖЬЛОЖЬЛОЖЬЛОЖЬЛОЖЬ	ЛОЖЬЛОЖЬЛОЖЬЛОЖЬЛОЖЬЛОЖЬЛОЖЬЛОЖЬЛОЖЬЛОЖЬЛОЖЬЛОЖЬЛОЖЬЛОЖЬЛОЖЬЛОЖЬЛОЖЬЛОЖЬЛОЖЬЛОЖЬ	ЛОЖЬЛОЖЬЛОЖЬЛОЖЬЛОЖЬЛОЖЬЛОЖЬЛОЖЬЛОЖЬЛОЖЬЛОЖЬЛОЖЬЛОЖЬЛОЖЬЛОЖЬЛОЖЬЛОЖЬЛОЖЬЛОЖЬЛОЖЬ	ЛОЖЬЛОЖЬЛОЖЬЛОЖЬЛОЖЬЛОЖЬЛОЖЬЛОЖЬЛОЖЬЛОЖЬЛОЖЬЛОЖЬЛОЖЬЛОЖЬЛОЖЬЛОЖЬЛОЖЬЛОЖЬЛОЖЬЛОЖЬ	ЛОЖЬЛОЖЬЛОЖЬЛОЖЬЛОЖЬЛОЖЬЛОЖЬЛОЖЬЛОЖЬЛОЖЬЛОЖЬЛОЖЬЛОЖЬЛОЖЬЛОЖЬЛОЖЬЛОЖЬЛОЖЬЛОЖЬЛОЖЬ	ЛОЖЬЛОЖЬЛОЖЬЛОЖЬЛОЖЬЛОЖЬЛОЖЬЛОЖЬЛОЖЬЛОЖЬЛОЖЬЛОЖЬЛОЖЬЛОЖЬЛОЖЬЛОЖЬЛОЖЬЛОЖЬЛОЖЬЛОЖЬ	ЛОЖЬЛОЖЬЛОЖЬЛОЖЬЛОЖЬЛОЖЬferrian-ЛОЖЬЛОЖЬЛОЖЬЛОЖЬЛОЖЬЛОЖЬЛОЖЬЛОЖЬЛОЖЬЛОЖЬЛОЖЬЛОЖЬЛОЖЬ	ЛОЖЬЛОЖЬЛОЖЬЛОЖЬЛОЖЬЛОЖЬЛОЖЬЛОЖЬЛОЖЬЛОЖЬЛОЖЬЛОЖЬЛОЖЬЛОЖЬЛОЖЬЛОЖЬЛОЖЬЛОЖЬЛОЖЬЛОЖЬ	ЛОЖЬЛОЖЬЛОЖЬЛОЖЬЛОЖЬЛОЖЬЛОЖЬЛОЖЬЛОЖЬЛОЖЬЛОЖЬЛОЖЬЛОЖЬЛОЖЬЛОЖЬЛОЖЬЛОЖЬЛОЖЬЛОЖЬЛОЖЬ	ЛОЖЬЛОЖЬЛОЖЬЛОЖЬЛОЖЬЛОЖЬЛОЖЬЛОЖЬЛОЖЬЛОЖЬЛОЖЬЛОЖЬЛОЖЬЛОЖЬЛОЖЬЛОЖЬЛОЖЬЛОЖЬЛОЖЬЛОЖЬ	ЛОЖЬЛОЖЬЛОЖЬЛОЖЬЛОЖЬЛОЖЬЛОЖЬЛОЖЬЛОЖЬЛОЖЬЛОЖЬЛОЖЬЛОЖЬЛОЖЬЛОЖЬЛОЖЬЛОЖЬЛОЖЬЛОЖЬЛОЖЬ	ЛОЖЬЛОЖЬЛОЖЬЛОЖЬЛОЖЬЛОЖЬЛОЖЬЛОЖЬЛОЖЬЛОЖЬЛОЖЬЛОЖЬЛОЖЬЛОЖЬЛОЖЬЛОЖЬЛОЖЬЛОЖЬЛОЖЬЛОЖЬ	ЛОЖЬЛОЖЬЛОЖЬЛОЖЬЛОЖЬЛОЖЬЛОЖЬЛОЖЬЛОЖЬЛОЖЬЛОЖЬЛОЖЬЛОЖЬЛОЖЬЛОЖЬЛОЖЬЛОЖЬЛОЖЬЛОЖЬЛОЖЬ	ЛОЖЬЛОЖЬЛОЖЬЛОЖЬЛОЖЬЛОЖЬЛОЖЬЛОЖЬЛОЖЬЛОЖЬЛОЖЬЛОЖЬЛОЖЬЛОЖЬЛОЖЬЛОЖЬЛОЖЬЛОЖЬЛОЖЬЛОЖЬ	ЛОЖЬЛОЖЬЛОЖЬЛОЖЬЛОЖЬЛОЖЬЛОЖЬЛОЖЬЛОЖЬЛОЖЬЛОЖЬЛОЖЬЛОЖЬЛОЖЬЛОЖЬЛОЖЬЛОЖЬЛОЖЬЛОЖЬЛОЖЬ	ЛОЖЬЛОЖЬЛОЖЬЛОЖЬЛОЖЬЛОЖЬЛОЖЬЛОЖЬЛОЖЬЛОЖЬЛОЖЬЛОЖЬЛОЖЬЛОЖЬЛОЖЬЛОЖЬЛОЖЬЛОЖЬЛОЖЬЛОЖЬ	ЛОЖЬЛОЖЬЛОЖЬЛОЖЬЛОЖЬЛОЖЬЛОЖЬЛОЖЬЛОЖЬЛОЖЬЛОЖЬЛОЖЬЛОЖЬЛОЖЬЛОЖЬЛОЖЬЛОЖЬЛОЖЬЛОЖЬЛОЖЬ	ЛОЖЬЛОЖЬЛОЖЬЛОЖЬЛОЖЬЛОЖЬferrian-ЛОЖЬЛОЖЬЛОЖЬЛОЖЬЛОЖЬЛОЖЬЛОЖЬЛОЖЬЛОЖЬЛОЖЬЛОЖЬЛОЖЬЛОЖЬ	ЛОЖЬЛОЖЬЛОЖЬЛОЖЬЛОЖЬЛОЖЬЛОЖЬЛОЖЬЛОЖЬЛОЖЬЛОЖЬЛОЖЬЛОЖЬЛОЖЬЛОЖЬЛОЖЬЛОЖЬЛОЖЬЛОЖЬЛОЖЬ	ЛОЖЬЛОЖЬЛОЖЬЛОЖЬЛОЖЬЛОЖЬЛОЖЬЛОЖЬЛОЖЬЛОЖЬЛОЖЬЛОЖЬЛОЖЬЛОЖЬЛОЖЬЛОЖЬЛОЖЬЛОЖЬЛОЖЬЛОЖЬ	ЛОЖЬЛОЖЬЛОЖЬЛОЖЬЛОЖЬЛОЖЬЛОЖЬЛОЖЬЛОЖЬЛОЖЬЛОЖЬЛОЖЬЛОЖЬЛОЖЬЛОЖЬЛОЖЬЛОЖЬЛОЖЬЛОЖЬЛОЖЬ
Final adjectival modifier									potassian-																										ferrian-											ferrian-
	ЛОЖЬЛОЖЬЛОЖЬЛОЖЬЛОЖЬЛОЖЬЛОЖЬЛОЖЬЛОЖЬ	ЛОЖЬЛОЖЬЛОЖЬЛОЖЬЛОЖЬЛОЖЬЛОЖЬЛОЖЬЛОЖЬ	ЛОЖЬЛОЖЬЛОЖЬЛОЖЬЛОЖЬЛОЖЬЛОЖЬЛОЖЬЛОЖЬ	ЛОЖЬЛОЖЬЛОЖЬЛОЖЬЛОЖЬЛОЖЬЛОЖЬЛОЖЬЛОЖЬ	ЛОЖЬЛОЖЬЛОЖЬЛОЖЬЛОЖЬЛОЖЬЛОЖЬЛОЖЬЛОЖЬ	ЛОЖЬЛОЖЬЛОЖЬsubcalcic sodian ЛОЖЬЛОЖЬЛОЖЬЛОЖЬ	ЛОЖЬЛОЖЬЛОЖЬsubcalcic sodian ЛОЖЬЛОЖЬЛОЖЬЛОЖЬ	ЛОЖЬЛОЖЬЛОЖЬsubcalcic sodian ЛОЖЬЛОЖЬЛОЖЬЛОЖЬ	ЛОЖЬЛОЖЬЛОЖЬЛОЖЬЛОЖЬЛОЖЬЛОЖЬЛОЖЬЛОЖЬ	ЛОЖЬЛОЖЬЛОЖЬsubcalcic sodian ЛОЖЬЛОЖЬЛОЖЬЛОЖЬ	ЛОЖЬЛОЖЬЛОЖЬЛОЖЬЛОЖЬЛОЖЬЛОЖЬЛОЖЬЛОЖЬ	ЛОЖЬЛОЖЬЛОЖЬsubcalcic ЛОЖЬЛОЖЬЛОЖЬЛОЖЬЛОЖЬ	ЛОЖЬЛОЖЬЛОЖЬsubcalcic sodian ЛОЖЬЛОЖЬЛОЖЬЛОЖЬ	ЛОЖЬЛОЖЬЛОЖЬsubcalcic sodian ЛОЖЬЛОЖЬЛОЖЬЛОЖЬ	ЛОЖЬЛОЖЬЛОЖЬsubcalcic ЛОЖЬЛОЖЬЛОЖЬЛОЖЬЛОЖЬ	ЛОЖЬЛОЖЬЛОЖЬЛОЖЬЛОЖЬЛОЖЬЛОЖЬЛОЖЬЛОЖЬ	ЛОЖЬЛОЖЬЛОЖЬsubcalcic sodian ЛОЖЬЛОЖЬЛОЖЬЛОЖЬ	ЛОЖЬЛОЖЬЛОЖЬsubcalcic sodian ЛОЖЬЛОЖЬЛОЖЬЛОЖЬ	ЛОЖЬЛОЖЬЛОЖЬsubcalcic sodian ЛОЖЬЛОЖЬЛОЖЬЛОЖЬ	ЛОЖЬЛОЖЬЛОЖЬsubcalcic sodian ЛОЖЬЛОЖЬЛОЖЬЛОЖЬ	ЛОЖЬЛОЖЬЛОЖЬЛОЖЬЛОЖЬЛОЖЬЛОЖЬЛОЖЬЛОЖЬ	ЛОЖЬЛОЖЬЛОЖЬЛОЖЬЛОЖЬЛОЖЬЛОЖЬЛОЖЬЛОЖЬ	ЛОЖЬЛОЖЬЛОЖЬsubcalcic sodian ЛОЖЬЛОЖЬЛОЖЬЛОЖЬ	ЛОЖЬЛОЖЬЛОЖЬsubcalcic sodian ЛОЖЬЛОЖЬЛОЖЬЛОЖЬ	ЛОЖЬЛОЖЬЛОЖЬsubcalcic sodian ЛОЖЬЛОЖЬЛОЖЬЛОЖЬ	ЛОЖЬЛОЖЬЛОЖЬsubcalcic sodian ЛОЖЬЛОЖЬЛОЖЬЛОЖЬ	ЛОЖЬЛОЖЬЛОЖЬsubcalcic sodian ЛОЖЬЛОЖЬЛОЖЬЛОЖЬ	ЛОЖЬЛОЖЬЛОЖЬsubcalcic sodian ЛОЖЬЛОЖЬЛОЖЬЛОЖЬ	ЛОЖЬЛОЖЬЛОЖЬЛОЖЬЛОЖЬЛОЖЬЛОЖЬЛОЖЬЛОЖЬ	ЛОЖЬЛОЖЬЛОЖЬsubcalcic sodian ЛОЖЬЛОЖЬЛОЖЬЛОЖЬ	ЛОЖЬЛОЖЬЛОЖЬsubcalcic sodian ЛОЖЬЛОЖЬЛОЖЬЛОЖЬ	ЛОЖЬЛОЖЬЛОЖЬЛОЖЬsodian ЛОЖЬЛОЖЬЛОЖЬЛОЖЬ	ЛОЖЬЛОЖЬЛОЖЬsubcalcic sodian ЛОЖЬЛОЖЬЛОЖЬЛОЖЬ	ЛОЖЬЛОЖЬЛОЖЬsubcalcic sodian ЛОЖЬЛОЖЬЛОЖЬЛОЖЬ	ЛОЖЬЛОЖЬЛОЖЬЛОЖЬЛОЖЬЛОЖЬЛОЖЬЛОЖЬЛОЖЬ	ЛОЖЬЛОЖЬЛОЖЬsubcalcic sodian ЛОЖЬЛОЖЬЛОЖЬЛОЖЬ	ЛОЖЬЛОЖЬЛОЖЬsubcalcic sodian ЛОЖЬЛОЖЬЛОЖЬЛОЖЬ	ЛОЖЬЛОЖЬЛОЖЬsubcalcic sodian ЛОЖЬЛОЖЬЛОЖЬЛОЖЬ	ЛОЖЬЛОЖЬЛОЖЬsubcalcic sodian ЛОЖЬЛОЖЬЛОЖЬЛОЖЬ	ЛОЖЬЛОЖЬЛОЖЬsubcalcic sodian ЛОЖЬЛОЖЬЛОЖЬЛОЖЬ	ЛОЖЬЛОЖЬЛОЖЬsubcalcic sodian ЛОЖЬЛОЖЬЛОЖЬЛОЖЬ	ЛОЖЬЛОЖЬЛОЖЬsubcalcic sodian ЛОЖЬЛОЖЬЛОЖЬЛОЖЬ	ЛОЖЬЛОЖЬЛОЖЬsubcalcic sodian ЛОЖЬЛОЖЬЛОЖЬЛОЖЬ	ЛОЖЬЛОЖЬЛОЖЬЛОЖЬsodian ЛОЖЬЛОЖЬЛОЖЬЛОЖЬ	ЛОЖЬЛОЖЬЛОЖЬsubcalcic sodian ЛОЖЬЛОЖЬЛОЖЬЛОЖЬ	ЛОЖЬЛОЖЬЛОЖЬЛОЖЬЛОЖЬЛОЖЬЛОЖЬЛОЖЬЛОЖЬ	ЛОЖЬЛОЖЬЛОЖЬsubcalcic sodian ЛОЖЬЛОЖЬЛОЖЬЛОЖЬ	ЛОЖЬЛОЖЬЛОЖЬЛОЖЬЛОЖЬЛОЖЬЛОЖЬЛОЖЬЛОЖЬ	ЛОЖЬЛОЖЬЛОЖЬsubcalcic sodian ЛОЖЬЛОЖЬЛОЖЬЛОЖЬ
Final prefix						subcalcic sodian	subcalcic sodian	subcalcic sodian		subcalcic sodian		subcalcic	subcalcic sodian	subcalcic sodian	subcalcic		subcalcic sodian	subcalcic sodian	subcalcic sodian	subcalcic sodian			subcalcic sodian	subcalcic sodian	subcalcic sodian	subcalcic sodian	subcalcic sodian	subcalcic sodian		subcalcic sodian	subcalcic sodian	sodian	subcalcic sodian	subcalcic sodian		subcalcic sodian	subcalcic sodian	subcalcic sodian	subcalcic sodian	subcalcic sodian	subcalcic sodian	subcalcic sodian	subcalcic sodian	sodian	subcalcic sodian		subcalcic sodian		subcalcic sodian
Fe-Mg-Mn monoclinic prefix			sodian
Get rid of empty cells 1
Get rid of empty cells 2						subcalcic sodian	subcalcic sodian	subcalcic sodian	potassian-	subcalcic sodian		subcalcic	subcalcic sodian	subcalcic sodian	subcalcic		subcalcic sodian	subcalcic sodian	subcalcic sodian	subcalcic sodian			subcalcic sodian	subcalcic sodian	subcalcic sodian	subcalcic sodian	subcalcic sodian	subcalcic sodian		subcalcic sodian	subcalcic sodian	sodian	subcalcic sodian	subcalcic sodian	ferrian-	subcalcic sodian	subcalcic sodian	subcalcic sodian	subcalcic sodian	subcalcic sodian	subcalcic sodian	subcalcic sodian	subcalcic sodian	sodian	subcalcic sodian	ferrian-	subcalcic sodian		subcalcic sodian
Get rid of empty monoclinic cells 1
Get rid of empty monoclinic cells 2			sodian						potassian-																										ferrian-											ferrian-
Part 17. Non IMA scheme amphs.
Sum of oxides	95.2	96.2	94.98	99.39	97.38	96.31	97.71	97.72	92	97.76	97.72	97.73	97.73	97.72	97.73	94.66	95.52	97.71	94.4321	94.38	97.75	97.74	97.74	95.87	97.9199	97.73	97.6171	94.44	97.74	96.3901	97.73	96.362	94.13	97.76	95.9127	97.73	97.72	96.7571	97.72	97.74	97.73	97.75	97.74	97.7	96.9221	97.72	97.77	97.72	97.73
? holmquistite	FALSE	FALSE	FALSE	FALSE	FALSE	FALSE	FALSE	FALSE	FALSE	FALSE	FALSE	FALSE	FALSE	FALSE	FALSE	FALSE	FALSE	FALSE	FALSE	FALSE	FALSE	FALSE	FALSE	FALSE	FALSE	FALSE	FALSE	FALSE	FALSE	FALSE	FALSE	FALSE	FALSE	FALSE	FALSE	FALSE	FALSE	FALSE	FALSE	FALSE	FALSE	FALSE	FALSE	FALSE	FALSE	FALSE	FALSE	FALSE	FALSE
? joesmithite	FALSE	FALSE	FALSE	FALSE	FALSE	FALSE	FALSE	FALSE	FALSE	FALSE	FALSE	FALSE	FALSE	FALSE	FALSE	FALSE	FALSE	FALSE	FALSE	FALSE	FALSE	FALSE	FALSE	FALSE	FALSE	FALSE	FALSE	FALSE	FALSE	FALSE	FALSE	FALSE	FALSE	FALSE	FALSE	FALSE	FALSE	FALSE	FALSE	FALSE	FALSE	FALSE	FALSE	FALSE	FALSE	FALSE	FALSE	FALSE	FALSE
? leakeite	FALSE	FALSE	FALSE	FALSE	FALSE	FALSE	FALSE	FALSE	FALSE	FALSE	FALSE	FALSE	FALSE	FALSE	FALSE	FALSE	FALSE	FALSE	FALSE	FALSE	FALSE	FALSE	FALSE	FALSE	FALSE	FALSE	FALSE	FALSE	FALSE	FALSE	FALSE	FALSE	FALSE	FALSE	FALSE	FALSE	FALSE	FALSE	FALSE	FALSE	FALSE	FALSE	FALSE	FALSE	FALSE	FALSE	FALSE	FALSE	FALSE
? kornite	FALSE	FALSE	FALSE	FALSE	FALSE	FALSE	FALSE	FALSE	FALSE	FALSE	FALSE	FALSE	FALSE	FALSE	FALSE	FALSE	FALSE	FALSE	FALSE	FALSE	FALSE	FALSE	FALSE	FALSE	FALSE	FALSE	FALSE	FALSE	FALSE	FALSE	FALSE	FALSE	FALSE	FALSE	FALSE	FALSE	FALSE	FALSE	FALSE	FALSE	FALSE	FALSE	FALSE	FALSE	FALSE	FALSE	FALSE	FALSE	FALSE
	ЛОЖЬЛОЖЬЛОЖЬЛОЖЬ	ЛОЖЬЛОЖЬЛОЖЬЛОЖЬ	ЛОЖЬЛОЖЬЛОЖЬЛОЖЬ	ЛОЖЬЛОЖЬЛОЖЬЛОЖЬ	ЛОЖЬЛОЖЬЛОЖЬЛОЖЬ	ЛОЖЬЛОЖЬЛОЖЬЛОЖЬ	ЛОЖЬЛОЖЬЛОЖЬЛОЖЬ	ЛОЖЬЛОЖЬЛОЖЬЛОЖЬ	ЛОЖЬЛОЖЬЛОЖЬЛОЖЬ	ЛОЖЬЛОЖЬЛОЖЬЛОЖЬ	ЛОЖЬЛОЖЬЛОЖЬЛОЖЬ	ЛОЖЬЛОЖЬЛОЖЬЛОЖЬ	ЛОЖЬЛОЖЬЛОЖЬЛОЖЬ	ЛОЖЬЛОЖЬЛОЖЬЛОЖЬ	ЛОЖЬЛОЖЬЛОЖЬЛОЖЬ	ЛОЖЬЛОЖЬЛОЖЬЛОЖЬ	ЛОЖЬЛОЖЬЛОЖЬЛОЖЬ	ЛОЖЬЛОЖЬЛОЖЬЛОЖЬ	ЛОЖЬЛОЖЬЛОЖЬЛОЖЬ	ЛОЖЬЛОЖЬЛОЖЬЛОЖЬ	ЛОЖЬЛОЖЬЛОЖЬЛОЖЬ	ЛОЖЬЛОЖЬЛОЖЬЛОЖЬ	ЛОЖЬЛОЖЬЛОЖЬЛОЖЬ	ЛОЖЬЛОЖЬЛОЖЬЛОЖЬ	ЛОЖЬЛОЖЬЛОЖЬЛОЖЬ	ЛОЖЬЛОЖЬЛОЖЬЛОЖЬ	ЛОЖЬЛОЖЬЛОЖЬЛОЖЬ	ЛОЖЬЛОЖЬЛОЖЬЛОЖЬ	ЛОЖЬЛОЖЬЛОЖЬЛОЖЬ	ЛОЖЬЛОЖЬЛОЖЬЛОЖЬ	ЛОЖЬЛОЖЬЛОЖЬЛОЖЬ	ЛОЖЬЛОЖЬЛОЖЬЛОЖЬ	ЛОЖЬЛОЖЬЛОЖЬЛОЖЬ	ЛОЖЬЛОЖЬЛОЖЬЛОЖЬ	ЛОЖЬЛОЖЬЛОЖЬЛОЖЬ	ЛОЖЬЛОЖЬЛОЖЬЛОЖЬ	ЛОЖЬЛОЖЬЛОЖЬЛОЖЬ	ЛОЖЬЛОЖЬЛОЖЬЛОЖЬ	ЛОЖЬЛОЖЬЛОЖЬЛОЖЬ	ЛОЖЬЛОЖЬЛОЖЬЛОЖЬ	ЛОЖЬЛОЖЬЛОЖЬЛОЖЬ	ЛОЖЬЛОЖЬЛОЖЬЛОЖЬ	ЛОЖЬЛОЖЬЛОЖЬЛОЖЬ	ЛОЖЬЛОЖЬЛОЖЬЛОЖЬ	ЛОЖЬЛОЖЬЛОЖЬЛОЖЬ	ЛОЖЬЛОЖЬЛОЖЬЛОЖЬ	ЛОЖЬЛОЖЬЛОЖЬЛОЖЬ	ЛОЖЬЛОЖЬЛОЖЬЛОЖЬ	ЛОЖЬЛОЖЬЛОЖЬЛОЖЬ
Alternative name
Hidden calculations	•	•	•	•	•	•	•	•	•	•	•	•	•	•	•	•	•	•	•	•	•	•	•	•	•	•	•	•	•	•	•	•	•	•	•	•	•	•	•	•	•	•	•	•	•	•	•	•	•
[truncated: 206 more columns]
