# Supplementary material for: Unique Amphibole Bearing Mantle Column Beneath the Leningrad Kimberlite Pipe, West Ukukit Field, NE Yakutia
Source: Preprints.org preprint supplement (doi:10.20944/preprints202112.0444.v1), 2021-12-28
Supplement: Supplementary file 3 [file AmfLeningradAll.xls]

## Sheet: Лист1
Input data here	Sample number	SiO2	TiO2	Al2O3	Cr2O3	FeO	MnO	MgO	CaO	Na2O	K2O	BaO	SrO	PbO	Name	Amphibole names	ZnO	F	Cl	NiO		Reformatted oxide %		SiO2	TiO2	Al2O3	Cr2O3	Fe2O3	FeO	MnO	MgO	NiO	ZnO	Li2O* (not implemented)	CaO	Na2O	K2O	BaO	SrO	PbO	F	Cl	H2O*			O=F,Cl	Total
OL5-123	A	0.0094	0.0496	5.4019	57.327	30.666	0.3618	6.7226	0.049	0.0299	0					chromium-						OL5-123	A	0.0094	0.0496	5.4019	57.327	34.0791	0	0.3618	6.7226	0	0		0.049	0.0299	0	0	0	0	0	0	1.64926		105.68	0	105.68
OL5-36	A	31.2914	3.2434	10.9488	0.0241	32.7254	0.3438	5.8099	2.234	0.452	5.8481					titanian-potassium-						OL5-36	A	31.2914	3.2434	10.9488	0.0241	3.10545	29.931	0.3438	5.8099	0	0		2.234	0.452	5.8481	0	0	0	0	0	1.70648		94.9384	0	94.9384
OL5-122	A	38.3152	0.0717	8.9074	0.1301	17.187	0.2758	20.3472	0.6101	0.2554	5.8997				gedrite	potassium-						OL5-122	A	38.3152	0.0717	8.9074	0.1301	7.31782	10.6021	0.2758	20.3472	0	0		0.6101	0.2554	5.8997	0	0	0	0	0	1.8903		94.6228	0	94.6228
Lng21	A	42.21	1.04	13.41	0.514	8.53	0.094	15.33	11.25	2.41	1.71				magnesio-hastingsite	potassian-						Lng21	A	42.21	1.04	13.41	0.514	5.55676	3.52976	0.094	15.33	0	0		11.25	2.41	1.71	0	0	0	0	0	2.05902		99.1135	0	99.1135
OL5-124	A	41.4966	0.051	12.8338	0.9425	2.4882	0.0027	26.2199	0.0042	2.3576	7.2355				magnesio-gedrite	potassium-						OL5-124	A	41.4966	0.051	12.8338	0.9425	0	2.4882	0.0027	26.2199	0	0		0.0042	2.3576	7.2355	0	0	0	0	0	2.02008		95.6521	0	95.6521
Lgam085	A	43.78	0.47	13.44	0.02	5.03	0.05	18.68	12.55	2.59	1.13				magnesio-hastingsite							Lgam085	A	43.78	0.47	13.44	0.02	5.57002	0.0178346	0.05	18.68	0	0		12.55	2.59	1.13	0	0	0	0	0	2.12396		100.422	0	100.422
Lgam083	A	43.75	0.47	13.53	0.01	5.05	0.04	18.56	12.6	2.58	1.14				magnesio-hastingsite							Lgam083	A	43.75	0.47	13.53	0.01	5.17625	0.392164	0.04	18.56	0	0		12.6	2.58	1.14	0	0	0	0	0	2.1216		100.37	0	100.37
Lgam078	A	43.94	0.46	13.53	0.04	5.02	0.04	18.53	12.5	2.53	1.16				magnesio-hastingsite							Lgam078	A	43.94	0.46	13.53	0.04	5.31826	0.234382	0.04	18.53	0	0		12.5	2.53	1.16	0	0	0	0	0	2.12474		100.407	0	100.407
OL5-56	A	42.3751	0.3033	11.7209	1.7963	4.2233	0.0332	18.3954	11.8341	3.1487	0.7535				magnesio-hastingsite							OL5-56	A	42.3751	0.3033	11.7209	1.7963	4.69335	0	0.0332	18.3954	0	0		11.8341	3.1487	0.7535	0	0	0	0	0	2.04702		97.1009	0	97.1009
Lgam090	A	43.98	0.48	13.43	0.01	5	0.05	18.53	12.6	2.55	1.1				magnesio-hastingsite							Lgam090	A	43.98	0.48	13.43	0.01	4.93175	0.562177	0.05	18.53	0	0		12.6	2.55	1.1	0	0	0	0	0	2.12256		100.346	0	100.346
Lgam081	A	43.99	0.45	13.53	0.01	5.02	0.04	18.44	12.58	2.52	1.15				magnesio-hastingsite							Lgam081	A	43.99	0.45	13.53	0.01	4.81586	0.686463	0.04	18.44	0	0		12.58	2.52	1.15	0	0	0	0	0	2.12208		100.334	0	100.334
Lgam373	A	44.22	0.38	14.22	1.39	3.7	0.06	18.09	12.05	3.57	0.05				pargasite							Lgam373	A	44.22	0.38	14.22	1.39	3.44943	0.596039	0.06	18.09	0	0		12.05	3.57	0.05	0	0	0	0	0	2.13299		100.208	0	100.208
Lgam087	A	44.08	0.44	13.51	0.02	4.97	0.05	18.47	12.51	2.57	1.11				magnesio-hastingsite							Lgam087	A	44.08	0.44	13.51	0.02	4.91564	0.546679	0.05	18.47	0	0		12.51	2.57	1.11	0	0	0	0	0	2.12389		100.346	0	100.346
Lgam370	A	43.17	0.3	12.52	1.15	1.83	0.02	20.82	11.7	3.23	0.18				pargasite							Lgam370	A	43.17	0.3	12.52	1.15	2.03368	0	0.02	20.82	0	0		11.7	3.23	0.18	0	0	0	0	0	2.07833		97.202	0	97.202
OL5-63	A	43.7858	0.2854	13.2103	1.5753	2.5908	0.0319	19.2342	11.8894	3.6869	0.158				pargasite	sodian						OL5-63	A	43.7858	0.2854	13.2103	1.5753	2.87916	0	0.0319	19.2342	0	0		11.8894	3.6869	0.158	0	0	0	0	0	2.10658		98.8429	0	98.8429
Lgam229	A	44.23	0.08	12.22	1.38	2.91	0.04	20.64	12.75	2.92	0.57				magnesio-hastingsite							Lgam229	A	44.23	0.08	12.22	1.38	3.23388	0	0.04	20.64	0	0		12.75	2.92	0.57	0	0	0	0	0	2.12667		100.191	0	100.191
Lgam080	A	44.08	0.49	13.52	0.04	5.03	0.05	18.26	12.55	2.56	1.15				pargasite							Lgam080	A	44.08	0.49	13.52	0.04	4.21894	1.2336	0.05	18.26	0	0		12.55	2.56	1.15	0	0	0	0	0	2.11933		100.272	0	100.272
Lng89	A	43.44	1.4	13.79	0.48	6.71	0.079	15.92	10.98	2.56	1.68				pargasite	potassian-						Lng89	A	43.44	1.4	13.79	0.48	4.03126	3.08248	0.079	15.92	0	0		10.98	2.56	1.68	0	0	0	0	0	2.08823		99.531	0	99.531
Lgam138	A	42.4	0.34	11.63	1.15	3.26	0.03	19.42	11.77	2.94	0.81				magnesio-hastingsite							Lgam138	A	42.4	0.34	11.63	1.15	3.62284	0	0.03	19.42	0	0		11.77	2.94	0.81	0	0	0	0	0	2.03737		96.1502	0	96.1502
OL5-81	A	43.1464	0.3218	12.0118	1.3889	4.2737	0.0302	18.5112	11.7504	3.2387	0.7621				magnesio-hastingsite							OL5-81	A	43.1464	0.3218	12.0118	1.3889	4.74936	0	0.0302	18.5112	0	0		11.7504	3.2387	0.7621	0	0	0	0	0	2.07098		97.9818	0	97.9818
Lgam297	A	44.44	0.36	12.9	1.35	3.55	0.05	19.18	12.33	3.17	0.39				magnesio-hastingsitic hornblende							Lgam297	A	44.44	0.36	12.9	1.35	3.94511	0	0.05	19.18	0	0		12.33	3.17	0.39	0	0	0	0	0	2.13085		100.246	0	100.246
OL5-57	A	44.0509	0.2976	13.2965	1.4887	2.5237	0.0369	19.1003	11.9028	3.7148	0.1678				pargasitic hornblende	sodian						OL5-57	A	44.0509	0.2976	13.2965	1.4887	2.80459	0	0.0369	19.1003	0	0		11.9028	3.7148	0.1678	0	0	0	0	0	2.11135		98.9722	0	98.9722
Lgam249	A	44.42	0.05	12.54	1.47	2.98	0.04	20.05	12.85	2.77	0.52				magnesio-hastingsitic hornblende							Lgam249	A	44.42	0.05	12.54	1.47	3.31167	0	0.04	20.05	0	0		12.85	2.77	0.52	0	0	0	0	0	2.12857		100.15	0	100.15
OL5-43	A	44.1207	0.2778	13.2817	1.4875	2.5698	0.0511	19.0409	11.9897	3.6904	0.1692				pargasitic hornblende	sodian						OL5-43	A	44.1207	0.2778	13.2817	1.4875	2.85582	0	0.0511	19.0409	0	0		11.9897	3.6904	0.1692	0	0	0	0	0	2.1131		99.0779	0	99.0779
Lgam366	A	43.48	0.31	11.99	1.31	1.97	0.05	20.69	11.91	3.41	0.2				pargasitic hornblende							Lgam366	A	43.48	0.31	11.99	1.31	2.18926	0	0.05	20.69	0	0		11.91	3.41	0.2	0	0	0	0	0	2.08234		97.6216	0	97.6216
OL5-14	A	41.5465	2.2563	10.8739	0.1364	17.2182	0.1745	10.3938	11.4692	2.1873	1.2239				magnesian hastingsitic hornblende	titanian-						OL5-14	A	41.5465	2.2563	10.8739	0.1364	3.77345	13.8227	0.1745	10.3938	0	0		11.4692	2.1873	1.2239	0	0	0	0	0	1.98842		99.8463	0	99.8463
OL5-18	A	44.0586	0.4643	12.0612	1.2663	3.8858	0.0485	18.9617	12.1345	3.0402	0.9827				magnesio-hastingsitic hornblende							OL5-18	A	44.0586	0.4643	12.0612	1.2663	4.11668	0.181416	0.0485	18.9617	0	0		12.1345	3.0402	0.9827	0	0	0	0	0	2.10312		99.4192	0	99.4192
Lgam372	A	44.89	0.21	13.21	1.27	2.69	0.05	19.64	12.52	3.13	0.13				pargasitic hornblende							Lgam372	A	44.89	0.21	13.21	1.27	2.9894	0	0.05	19.64	0	0		12.52	3.13	0.13	0	0	0	0	0	2.14041		100.18	0	100.18
Lgam305	A	44.88	0.03	13.04	1.31	3.13	0.05	19.46	12.66	2.83	0.37				pargasitic hornblende							Lgam305	A	44.88	0.03	13.04	1.31	3.47837	0	0.05	19.46	0	0		12.66	2.83	0.37	0	0	0	0	0	2.13717		100.246	0	100.246
Lgam252	A	45.01	0.07	12.53	1.5	2.98	0.04	19.59	12.83	2.66	0.51				pargasitic hornblende							Lgam252	A	45.01	0.07	12.53	1.5	3.31167	0	0.04	19.59	0	0		12.83	2.66	0.51	0	0	0	0	0	2.13388		100.186	0	100.186
Lgam144	A	44.93	0.48	11.7	0.02	7.1	0.04	18.12	11.75	2.81	0.78				magnesio-hastingsitic hornblende							Lgam144	A	44.93	0.48	11.7	0.02	7.51227	0.340109	0.04	18.12	0	0		11.75	2.81	0.78	0	0	0	0	0	2.12384		100.606	0	100.606
Lgam367	A	42.59	0.3	12.08	1.22	1.95	0.04	18.35	11.77	3.02	0.2				pargasitic hornblende							Lgam367	A	42.59	0.3	12.08	1.22	2.16703	0	0.04	18.35	0	0		11.77	3.02	0.2	0	0	0	0	0	2.00682		93.7439	0	93.7439
Lgam209	A	45.28	0.29	11.49	1.69	2.44	0.03	20.43	12.76	2.7	0.61				magnesio-hastingsitic hornblende							Lgam209	A	45.28	0.29	11.49	1.69	2.71157	0	0.03	20.43	0	0		12.76	2.7	0.61	0	0	0	0	0	2.13195		100.124	0	100.124
Lgam197	A	45.42	0.64	12.44	1.34	2.5	0.04	19.39	12.84	2.48	0.62				pargasitic hornblende							Lgam197	A	45.42	0.64	12.44	1.34	2.53244	0.221191	0.04	19.39	0	0		12.84	2.48	0.62	0	0	0	0	0	2.13704		100.101	0	100.101
Lgam192	A	45.39	0.06	11.63	1.8	3.01	0.05	19.84	12.32	3.02	0.63				magnesio-hastingsitic hornblende							Lgam192	A	45.39	0.06	11.63	1.8	3.34501	0	0.05	19.84	0	0		12.32	3.02	0.63	0	0	0	0	0	2.13138		100.216	0	100.216
Lgam153	A	45.69	0.01	12.85	1.29	2.62	0.04	19.34	12.74	2.41	0.74				pargasitic hornblende							Lgam153	A	45.69	0.01	12.85	1.29	2.91161	0	0.04	19.34	0	0		12.74	2.41	0.74	0	0	0	0	0	2.14132		100.163	0	100.163
Lgam156	A	45.57	0.02	11.96	1.53	2.95	0.04	19.7	12.45	2.8	0.73				pargasitic hornblende							Lgam156	A	45.57	0.02	11.96	1.53	3.27833	0	0.04	19.7	0	0		12.45	2.8	0.73	0	0	0	0	0	2.13477		100.213	0	100.213
Lgam196	A	45.57	0.3	11.46	1.73	2.5	0.04	20	12.85	2.63	0.62				pargasitic hornblende							Lgam196	A	45.57	0.3	11.46	1.73	2.77825	0	0.04	20	0	0		12.85	2.63	0.62	0	0	0	0	0	2.13282		100.111	0	100.111
Lgam186	A	45.6	0.32	11.47	1.65	2.47	0.05	20.09	12.68	2.75	0.64				pargasitic hornblende							Lgam186	A	45.6	0.32	11.47	1.65	2.74491	0	0.05	20.09	0	0		12.68	2.75	0.64	0	0	0	0	0	2.13367		100.129	0	100.129
Lgam274	A	45.75	0.07	12	1.56	2.86	0.05	19.72	12.69	2.6	0.44				pargasitic hornblende							Lgam274	A	45.75	0.07	12	1.56	3.17832	0	0.05	19.72	0	0		12.69	2.6	0.44	0	0	0	0	0	2.13927		100.198	0	100.198
Lgam263	A	45.73	0.22	11.82	1.68	2.5	0.04	19.89	12.76	2.59	0.48				pargasitic hornblende							Lgam263	A	45.73	0.22	11.82	1.68	2.77825	0	0.04	19.89	0	0		12.76	2.59	0.48	0	0	0	0	0	2.13789		100.126	0	100.126
Lgam255	A	45.7	0.07	11.89	1.52	2.83	0.05	19.68	12.9	2.54	0.5				pargasitic hornblende							Lgam255	A	45.7	0.07	11.89	1.52	3.14498	0	0.05	19.68	0	0		12.9	2.54	0.5	0	0	0	0	0	2.13622		100.131	0	100.131
Lgam208	A	45.69	0.28	11.67	1.8	2.47	0.04	19.84	12.64	2.69	0.61				pargasitic hornblende							Lgam208	A	45.69	0.28	11.67	1.8	2.74491	0	0.04	19.84	0	0		12.64	2.69	0.61	0	0	0	0	0	2.13563		100.141	0	100.141
Lgam128	A	45.81	0.4	12.15	0.36	2.77	0.04	20.11	12.78	2.47	0.84				pargasitic hornblende							Lgam128	A	45.81	0.4	12.15	0.36	3.0783	0	0.04	20.11	0	0		12.78	2.47	0.84	0	0	0	0	0	2.14115		100.179	0	100.179
Lgam168	A	45.72	0.05	11.98	1.44	2.83	0.04	19.68	12.76	2.54	0.69				pargasitic hornblende							Lgam168	A	45.72	0.05	11.98	1.44	3.14498	0	0.04	19.68	0	0		12.76	2.54	0.69	0	0	0	0	0	2.1367		100.182	0	100.182
Lgam207	A	45.71	0.29	11.52	1.8	2.42	0.05	20.02	12.64	2.67	0.61				pargasitic hornblende							Lgam207	A	45.71	0.29	11.52	1.8	2.68935	0	0.05	20.02	0	0		12.64	2.67	0.61	0	0	0	0	0	2.13542		100.135	0	100.135
Lgam261	A	45.9	0.02	12.33	1.25	2.4	0.05	19.88	12.92	2.5	0.48				pargasitic hornblende							Lgam261	A	45.9	0.02	12.33	1.25	2.66712	0	0.05	19.88	0	0		12.92	2.5	0.48	0	0	0	0	0	2.14288		100.14	0	100.14
OL5-87	A	44.7902	0.035	11.1277	1.7241	3.0727	0.0446	19.3343	12.1367	2.911	0.7149				magnesio-hastingsitic hornblende							OL5-87	A	44.7902	0.035	11.1277	1.7241	3.41469	0	0.0446	19.3343	0	0		12.1367	2.911	0.7149	0	0	0	0	0	2.0904		98.3236	0	98.3236
Lgam262	A	45.89	0.02	11.93	1.66	2.41	0.04	20.02	12.7	2.59	0.48				pargasitic hornblende							Lgam262	A	45.89	0.02	11.93	1.66	2.67823	0	0.04	20.02	0	0		12.7	2.59	0.48	0	0	0	0	0	2.14058		100.149	0	100.149
Lgam286	A	44.24	0.03	11.71	1.25	1.86	0.03	19.58	12.32	2.64	0.41				pargasitic hornblende							Lgam286	A	44.24	0.03	11.71	1.25	2.06702	0	0.03	19.58	0	0		12.32	2.64	0.41	0	0	0	0	0	2.06343		96.3404	0	96.3404
Lgam184	A	45.9	0.04	12.04	1.6	2.4	0.05	19.75	12.88	2.45	0.64				pargasitic hornblende							Lgam184	A	45.9	0.04	12.04	1.6	2.66712	0	0.05	19.75	0	0		12.88	2.45	0.64	0	0	0	0	0	2.13961		100.157	0	100.157
Lgam369	A	46.06	0.01	12.37	1.33	2.4	0.05	19.86	12.72	2.77	0.18				pargasitic hornblende							Lgam369	A	46.06	0.01	12.37	1.33	2.66712	0	0.05	19.86	0	0		12.72	2.77	0.18	0	0	0	0	0	2.14675		100.164	0	100.164
Lgam185	A	45.84	0.32	11.46	1.74	2.45	0.05	19.88	12.69	2.65	0.64				pargasitic hornblende							Lgam185	A	45.84	0.32	11.46	1.74	2.72269	0	0.05	19.88	0	0		12.69	2.65	0.64	0	0	0	0	0	2.13556		100.128	0	100.128
Lgam206	A	45.88	0.3	11.48	1.77	2.43	0.04	19.95	12.63	2.63	0.61				pargasitic hornblende							Lgam206	A	45.88	0.3	11.48	1.77	2.70046	0	0.04	19.95	0	0		12.63	2.63	0.61	0	0	0	0	0	2.13671		100.127	0	100.127
Lgam089	A	45.84	0.07	12.32	1.44	2.44	0.03	19.41	12.69	2.4	1.1				pargasitic hornblende							Lgam089	A	45.84	0.07	12.32	1.44	2.25376	0.411958	0.03	19.41	0	0		12.69	2.4	1.1	0	0	0	0	0	2.13474		100.1	0	100.1
Lgam203	A	45.92	0.3	11.51	1.77	2.43	0.04	19.94	12.62	2.6	0.61				pargasitic hornblende							Lgam203	A	45.92	0.3	11.51	1.77	2.70046	0	0.04	19.94	0	0		12.62	2.6	0.61	0	0	0	0	0	2.13774		100.148	0	100.148
Lgam204	A	45.9	0.29	11.5	1.82	2.47	0.04	19.82	12.62	2.66	0.61				pargasitic hornblende							Lgam204	A	45.9	0.29	11.5	1.82	2.74491	0	0.04	19.82	0	0		12.62	2.66	0.61	0	0	0	0	0	2.13664		100.142	0	100.142
Lgam260	A	45.96	0.08	11.86	1.54	2.86	0.03	19.57	12.72	2.63	0.48				pargasitic hornblende							Lgam260	A	45.96	0.08	11.86	1.54	3.17832	0	0.03	19.57	0	0		12.72	2.63	0.48	0	0	0	0	0	2.1394		100.188	0	100.188
Lgam183	A	45.96	0.1	11.81	1.48	2.37	0.03	19.95	13.01	2.35	0.64				pargasitic hornblende							Lgam183	A	45.96	0.1	11.81	1.48	2.63378	0	0.03	19.95	0	0		13.01	2.35	0.64	0	0	0	0	0	2.13893		100.103	0	100.103
Lgam219	A	45.93	0.26	11.53	1.67	2.43	0.03	19.98	12.58	2.7	0.6				pargasitic hornblende							Lgam219	A	45.93	0.26	11.53	1.67	2.70046	0	0.03	19.98	0	0		12.58	2.7	0.6	0	0	0	0	0	2.13742		100.118	0	100.118
Lgam182	A	45.96	0.29	11.56	1.64	2.46	0.04	19.99	12.61	2.56	0.64				pargasitic hornblende							Lgam182	A	45.96	0.29	11.56	1.64	2.7338	0	0.04	19.99	0	0		12.61	2.56	0.64	0	0	0	0	0	2.13879		100.163	0	100.163
Lgam227	A	46	0.08	11.9	1.69	2.39	0.04	19.89	12.5	2.68	0.57				pargasitic hornblende							Lgam227	A	46	0.08	11.9	1.69	2.65601	0	0.04	19.89	0	0		12.5	2.68	0.57	0	0	0	0	0	2.14063		100.147	0	100.147
Lgam218	A	45.94	0.29	11.55	1.77	2.47	0.05	19.84	12.61	2.62	0.6				pargasitic hornblende							Lgam218	A	45.94	0.29	11.55	1.77	2.74491	0	0.05	19.84	0	0		12.61	2.62	0.6	0	0	0	0	0	2.13783		100.153	0	100.153
Lgam205	A	45.89	0.1	11.13	1.72	2.46	0.05	20.39	12.76	2.6	0.61				magnesio-hastingsitic hornblende							Lgam205	A	45.89	0.1	11.13	1.72	2.7338	0	0.05	20.39	0	0		12.76	2.6	0.61	0	0	0	0	0	2.1348		100.119	0	100.119
Lgam178	A	45.96	0.02	11.5	1.56	2.3	0.03	20.38	12.93	2.36	0.65				pargasitic hornblende							Lgam178	A	45.96	0.02	11.5	1.56	2.55599	0	0.03	20.38	0	0		12.93	2.36	0.65	0	0	0	0	0	2.13775		100.084	0	100.084
Lgam202	A	45.95	0.02	11.56	1.56	3.06	0.04	19.67	12.59	2.69	0.61				pargasitic hornblende							Lgam202	A	45.95	0.02	11.56	1.56	3.40058	0	0.04	19.67	0	0		12.59	2.69	0.61	0	0	0	0	0	2.13671		100.227	0	100.227
Lgam177	A	46	0.08	11.84	1.45	2.4	0.04	19.84	13.04	2.36	0.65				pargasitic hornblende							Lgam177	A	46	0.08	11.84	1.45	2.66712	0	0.04	19.84	0	0		13.04	2.36	0.65	0	0	0	0	0	2.1389		100.106	0	100.106
Lgam228	A	45.98	0.03	11.7	1.51	2.99	0.04	19.59	12.73	2.59	0.57				pargasitic hornblende							Lgam228	A	45.98	0.03	11.7	1.51	3.32279	0	0.04	19.59	0	0		12.73	2.59	0.57	0	0	0	0	0	2.1378		100.201	0	100.201
Lgam132	A	44.69	0.01	11.13	1.02	1.47	0	20.9	12.38	2.35	0.83				pargasitic hornblende							Lgam132	A	44.69	0.01	11.13	1.02	1.63361	0	0	20.9	0	0		12.38	2.35	0.83	0	0	0	0	0	2.07746		97.0211	0	97.0211
Lgam233	A	46.03	0.02	11.7	1.5	2.99	0.04	19.61	12.61	2.66	0.56				pargasitic hornblende							Lgam233	A	46.03	0.02	11.7	1.5	3.32279	0	0.04	19.61	0	0		12.61	2.66	0.56	0	0	0	0	0	2.13826		100.191	0	100.191
Lgam217	A	46.03	0.3	11.37	1.75	2.44	0.05	19.95	12.65	2.61	0.6				pargasitic hornblende							Lgam217	A	46.03	0.3	11.37	1.75	2.71157	0	0.05	19.95	0	0		12.65	2.61	0.6	0	0	0	0	0	2.138		100.16	0	100.16
Lgam279	A	46.15	0.15	11.75	1.42	2.51	0.04	20	12.77	2.53	0.43				pargasitic hornblende							Lgam279	A	46.15	0.15	11.75	1.42	2.78936	0	0.04	20	0	0		12.77	2.53	0.43	0	0	0	0	0	2.1431		100.172	0	100.172
Lgam243	A	46.06	0.28	11.36	1.7	2.43	0.03	19.93	12.75	2.63	0.54				pargasitic hornblende							Lgam243	A	46.06	0.28	11.36	1.7	2.70046	0	0.03	19.93	0	0		12.75	2.63	0.54	0	0	0	0	0	2.13776		100.118	0	100.118
Lgam283	A	46.18	0.14	11.67	1.42	2.45	0.05	20.17	12.68	2.56	0.42				pargasitic hornblende							Lgam283	A	46.18	0.14	11.67	1.42	2.72269	0	0.05	20.17	0	0		12.68	2.56	0.42	0	0	0	0	0	2.14331		100.156	0	100.156
OL5-20	A	45.8088	0.0498	11.6684	1.4778	2.4432	0.0371	19.7914	12.5306	2.8968	0.2212				pargasitic hornblende							OL5-20	A	45.8088	0.0498	11.6684	1.4778	2.71513	0	0.0371	19.7914	0	0		12.5306	2.8968	0.2212	0	0	0	0	0	2.12563		99.3227	0	99.3227
Lgam201	A	46.1	0.29	11.59	1.78	2.42	0.04	19.65	12.64	2.61	0.61				pargasitic hornblende							Lgam201	A	46.1	0.29	11.59	1.78	2.68935	0	0.04	19.65	0	0		12.64	2.61	0.61	0	0	0	0	0	2.13884		100.138	0	100.138
Lgam152	A	46.06	0.04	11.4	1.81	2.4	0.03	19.94	12.9	2.4	0.74				pargasitic hornblende							Lgam152	A	46.06	0.04	11.4	1.81	2.66712	0	0.03	19.94	0	0		12.9	2.4	0.74	0	0	0	0	0	2.13623		100.123	0	100.123
Lgam226	A	46.15	0.3	11.51	1.66	2.44	0.05	19.88	12.59	2.58	0.58				pargasitic hornblende							Lgam226	A	46.15	0.3	11.51	1.66	2.71157	0	0.05	19.88	0	0		12.59	2.58	0.58	0	0	0	0	0	2.14022		100.152	0	100.152
Lgam365	A	46.34	0.02	12.45	1.3	2.43	0.05	19.51	12.67	2.78	0.2				pargasitic hornblende							Lgam365	A	46.34	0.02	12.45	1.3	2.70046	0	0.05	19.51	0	0		12.67	2.78	0.2	0	0	0	0	0	2.14891		100.169	0	100.169
Lgam301	A	46.24	0.14	11.67	1.47	2.47	0.04	20.1	12.72	2.52	0.38				pargasitic hornblende							Lgam301	A	46.24	0.14	11.67	1.47	2.74491	0	0.04	20.1	0	0		12.72	2.52	0.38	0	0	0	0	0	2.14423		100.169	0	100.169
Lgam371	A	46.38	0.04	12.38	1.34	2.29	0.04	19.73	12.7	2.69	0.15				pargasitic hornblende							Lgam371	A	46.38	0.04	12.38	1.34	2.54488	0	0.04	19.73	0	0		12.7	2.69	0.15	0	0	0	0	0	2.15009		100.145	0	100.145
Lgam127	A	46.13	0.14	11.39	1.54	2.47	0.03	20.11	12.74	2.34	0.84				pargasitic hornblende							Lgam127	A	46.13	0.14	11.39	1.54	2.74491	0	0.03	20.11	0	0		12.74	2.34	0.84	0	0	0	0	0	2.1379		100.143	0	100.143
Lgam181	A	46.1	0.32	11.57	1.67	2.45	0.04	19.62	12.72	2.61	0.64				pargasitic hornblende							Lgam181	A	46.1	0.32	11.57	1.67	2.30435	0.376439	0.04	19.62	0	0		12.72	2.61	0.64	0	0	0	0	0	2.13649		100.107	0	100.107
Lgam266	A	46.31	0	12.32	1.2	2.42	0.05	19.62	12.87	2.45	0.47				pargasitic hornblende							Lgam266	A	46.31	0	12.32	1.2	2.68935	0	0.05	19.62	0	0		12.87	2.45	0.47	0	0	0	0	0	2.14604		100.125	0	100.125
Lgam109	A	46.25	0.07	12.35	1.04	2.49	0.04	19.53	12.75	2.28	0.93				pargasitic hornblende							Lgam109	A	46.25	0.07	12.35	1.04	2.69636	0.0636868	0.04	19.53	0	0		12.75	2.28	0.93	0	0	0	0	0	2.143		100.143	0	100.143
Lgam149	A	44.77	0.05	10.47	1.14	2.03	0	20.79	12.05	2.77	0.76				pargasitic hornblende							Lgam149	A	44.77	0.05	10.47	1.14	2.25594	0	0	20.79	0	0		12.05	2.77	0.76	0	0	0	0	0	2.07411		97.13	0	97.13
Lgam200	A	46.12	0.11	11.2	1.75	2.45	0.05	20.05	12.8	2.57	0.61				pargasitic hornblende							Lgam200	A	46.12	0.11	11.2	1.75	2.72269	0	0.05	20.05	0	0		12.8	2.57	0.61	0	0	0	0	0	2.13648		100.119	0	100.119
Lgam191	A	46.04	0.07	10.43	1.65	2.38	0.04	20.96	13	2.48	0.63				magnesio-hastingsitic hornblende							Lgam191	A	46.04	0.07	10.43	1.65	2.64489	0	0.04	20.96	0	0		13	2.48	0.63	0	0	0	0	0	2.13257		100.077	0	100.077
Lgam291	A	46.33	0.13	11.84	1.36	2.47	0.05	19.9	12.75	2.5	0.4				pargasitic hornblende							Lgam291	A	46.33	0.13	11.84	1.36	2.74491	0	0.05	19.9	0	0		12.75	2.5	0.4	0	0	0	0	0	2.14515		100.15	0	100.15
Lgam258	A	46.24	0.27	11.32	1.72	2.48	0.06	19.86	12.6	2.7	0.49				pargasitic hornblende							Lgam258	A	46.24	0.27	11.32	1.72	2.75602	0	0.06	19.86	0	0		12.6	2.7	0.49	0	0	0	0	0	2.13981		100.156	0	100.156
OL5-50	A	47.0292	0.3954	11.1943	0.6892	2.8696	0.0315	20.7514	12.8138	3.0075	0.6841				magnesio-hastingsitic hornblende							OL5-50	A	47.0292	0.3954	11.1943	0.6892	3.18899	0	0.0315	20.7514	0	0		12.8138	3.0075	0.6841	0	0	0	0	0	2.17588		101.961	0	101.961
Lgam251	A	46.29	0.29	11.44	1.55	2.39	0.04	19.97	12.73	2.5	0.51				pargasitic hornblende							Lgam251	A	46.29	0.29	11.44	1.55	2.65601	0	0.04	19.97	0	0		12.73	2.5	0.51	0	0	0	0	0	2.14154		100.118	0	100.118
OL5-77	A	45.4611	0.0116	11.8105	1.3312	2.3847	0.0295	19.1922	12.4089	2.48	0.8025				pargasitic hornblende							OL5-77	A	45.4611	0.0116	11.8105	1.3312	2.36132	0.259875	0.0295	19.1922	0	0		12.4089	2.48	0.8025	0	0	0	0	0	2.10058		98.2493	0	98.2493
Lgam296	A	46.41	0.14	11.54	1.55	2.42	0.03	19.84	12.79	2.63	0.39				pargasitic hornblende							Lgam296	A	46.41	0.14	11.54	1.55	2.68935	0	0.03	19.84	0	0		12.79	2.63	0.39	0	0	0	0	0	2.14337		100.153	0	100.153
Lgam160	A	46.27	0.02	10.68	1.66	2.94	0.05	20.25	12.56	2.58	0.72				magnesio-hastingsitic hornblende							Lgam160	A	46.27	0.02	10.68	1.66	3.26722	0	0.05	20.25	0	0		12.56	2.58	0.72	0	0	0	0	0	2.13484		100.192	0	100.192
OL5-84	A	45.7387	0.0022	11.3934	1.341	2.3224	0.0248	19.6095	12.587	2.4271	0.7563				edenitic hornblende							OL5-84	A	45.7387	0.0022	11.3934	1.341	2.58088	0	0.0248	19.6095	0	0		12.587	2.4271	0.7563	0	0	0	0	0	2.10807		98.569	0	98.569
Lgam135	A	46.45	0.39	10.75	1.57	2.53	0.03	20.21	12.71	2.28	0.82				edenitic hornblende							Lgam135	A	46.45	0.39	10.75	1.57	2.81159	0	0.03	20.21	0	0		12.71	2.28	0.82	0	0	0	0	0	2.13844		100.16	0	100.16
Lgam162	A	46.46	0.4	10.77	1.85	2.49	0.04	20.04	12.69	2.29	0.71				edenitic hornblende							Lgam162	A	46.46	0.4	10.77	1.85	2.76714	0	0.04	20.04	0	0		12.69	2.29	0.71	0	0	0	0	0	2.13877		100.156	0	100.156
Lgam290	A	46.58	0.13	11.24	1.49	2.45	0.03	20.14	12.71	2.57	0.4				edenitic hornblende							Lgam290	A	46.58	0.13	11.24	1.49	2.72269	0	0.03	20.14	0	0		12.71	2.57	0.4	0	0	0	0	0	2.14429		100.157	0	100.157
Lgam155	A	46.44	0.29	10.83	1.82	2.47	0.04	19.96	12.75	2.38	0.73				edenitic hornblende							Lgam155	A	46.44	0.29	10.83	1.82	2.74491	0	0.04	19.96	0	0		12.75	2.38	0.73	0	0	0	0	0	2.13727		100.122	0	100.122
Lgam225	A	46.47	0.03	10.74	1.62	3.01	0.05	20.04	12.59	2.62	0.58				edenitic hornblende							Lgam225	A	46.47	0.03	10.74	1.62	3.34501	0	0.05	20.04	0	0		12.59	2.62	0.58	0	0	0	0	0	2.13784		100.223	0	100.223
Lgam170	A	46.65	0.09	11.58	1.09	2.4	0.03	20.15	12.75	2.32	0.68				edenitic hornblende							Lgam170	A	46.65	0.09	11.58	1.09	2.66712	0	0.03	20.15	0	0		12.75	2.32	0.68	0	0	0	0	0	2.14609		100.153	0	100.153
OL5-54	A	45.636	0.0482	11.2483	1.4757	2.309	0.0459	19.4084	12.1983	2.8645	0.378				edenitic hornblende							OL5-54	A	45.636	0.0482	11.2483	1.4757	2.56599	0	0.0459	19.4084	0	0		12.1983	2.8645	0.378	0	0	0	0	0	2.09809		97.9674	0	97.9674
Lgam190	A	46.56	0.01	11.3	1.75	2.34	0.03	19.79	13	2.3	0.63				edenitic hornblende							Lgam190	A	46.56	0.01	11.3	1.75	2.3139	0.257846	0.03	19.79	0	0		13	2.3	0.63	0	0	0	0	0	2.13937		100.081	0	100.081
Lgam133	A	43.07	0.33	11.01	0.95	2.78	0	17.71	11.71	2.55	0.83				edenitic hornblende							Lgam133	A	43.07	0.33	11.01	0.95	0.660812	2.18537	0	17.71	0	0		11.71	2.55	0.83	0	0	0	0	0	1.97833		92.9845	0	92.9845
Lgam159	A	46.57	0.28	10.55	1.95	2.38	0.05	20.17	12.74	2.33	0.72				edenitic hornblende							Lgam159	A	46.57	0.28	10.55	1.95	2.64489	0	0.05	20.17	0	0		12.74	2.33	0.72	0	0	0	0	0	2.13789		100.143	0	100.143
Lgam295	A	46.72	0.12	11.05	1.3	2.38	0.04	20.33	12.9	2.5	0.39				edenitic hornblende							Lgam295	A	46.72	0.12	11.05	1.3	2.64489	0	0.04	20.33	0	0		12.9	2.5	0.39	0	0	0	0	0	2.14478		100.14	0	100.14
Lgam167	A	45.77	0.35	10.04	0.75	2.16	0.01	21.16	11.88	3.12	0.69				edenitic hornblende							Lgam167	A	45.77	0.35	10.04	0.75	2.40041	0	0.01	21.16	0	0		11.88	3.12	0.69	0	0	0	0	0	2.10102		98.2714	0	98.2714
Lgam224	A	46.6	0.04	10.53	2	2.46	0.04	20.29	12.6	2.59	0.58				edenitic hornblende							Lgam224	A	46.6	0.04	10.53	2	2.7338	0	0.04	20.29	0	0		12.6	2.59	0.58	0	0	0	0	0	2.13797		100.142	0	100.142
Lgam154	A	46.61	0.02	10.67	1.64	2.96	0.04	20.06	12.47	2.55	0.73				edenitic hornblende							Lgam154	A	46.61	0.02	10.67	1.64	3.28945	0	0.04	20.06	0	0		12.47	2.55	0.73	0	0	0	0	0	2.13814		100.218	0	100.218
Lgam267	A	45.57	0.03	10.65	0.99	1.61	0.03	20.77	12.31	2.69	0.47				edenitic hornblende							Lgam267	A	45.57	0.03	10.65	0.99	1.78919	0	0.03	20.77	0	0		12.31	2.69	0.47	0	0	0	0	0	2.08969		97.3889	0	97.3889
Lgam306	A	46.78	0.11	11.05	1.49	2.39	0.04	20.21	12.81	2.48	0.36				edenitic hornblende							Lgam306	A	46.78	0.11	11.05	1.49	2.65601	0	0.04	20.21	0	0		12.81	2.48	0.36	0	0	0	0	0	2.14515		100.131	0	100.131
OL5-99	A	46.3638	0.3581	10.4754	0.5907	2.9572	0.0338	20.294	12.1409	3.1724	0.638				edenitic hornblende							OL5-99	A	46.3638	0.3581	10.4754	0.5907	3.28634	0	0.0338	20.294	0	0		12.1409	3.1724	0.638	0	0	0	0	0	2.12458		99.478	0	99.478
Lgam148	A	46.7	0.06	10.75	1.71	2.31	0.03	20.25	12.94	2.22	0.76				edenitic hornblende							Lgam148	A	46.7	0.06	10.75	1.71	2.5671	0	0.03	20.25	0	0		12.94	2.22	0.76	0	0	0	0	0	2.13979		100.127	0	100.127
OL5-85	A	45.6453	0.1226	10.3577	1.7661	2.262	0.0438	19.6998	12.271	2.7807	0.4016				edenitic hornblende							OL5-85	A	45.6453	0.1226	10.3577	1.7661	2.51376	0	0.0438	19.6998	0	0		12.271	2.7807	0.4016	0	0	0	0	0	2.08878		97.6911	0	97.6911
Lgam171	A	45.67	0.35	10.67	0.6	2.28	0.02	19.74	11.92	3.05	0.68				edenitic hornblende							Lgam171	A	45.67	0.35	10.67	0.6	2.30688	0.204157	0.02	19.74	0	0		11.92	3.05	0.68	0	0	0	0	0	2.08357		97.2946	0	97.2946
Lgam124	A	45.14	0.07	11.66	1.09	1.56	0	18.84	12.26	1.9	0.86				edenitic hornblende							Lgam124	A	45.14	0.07	11.66	1.09	1.55437	0.161302	0	18.84	0	0		12.26	1.9	0.86	0	0	0	0	0	2.05711		95.5928	0	95.5928
Lgam368	A	43.81	0.23	11.25	1.04	1.89	0.01	17.92	12.09	2.76	0.19				edenitic hornblende							Lgam368	A	43.81	0.23	11.25	1.04	0	1.89	0.01	17.92	0	0		12.09	2.76	0.19	0	0	0	0	0	1.99647		93.1865	0	93.1865
Lgam347	A	47.02	0.04	10.06	1.87	3.01	0.07	20.4	11.54	3.48	0.26				edenitic hornblende							Lgam347	A	47.02	0.04	10.06	1.87	3.34501	0	0.07	20.4	0	0		11.54	3.48	0.26	0	0	0	0	0	2.14133		100.226	0	100.226
Lgam221	A	45.92	0.03	10.05	1.28	1.69	0.03	20.94	12.37	2.26	0.59				edenitic hornblende							Lgam221	A	45.92	0.03	10.05	1.28	1.8781	0	0.03	20.94	0	0		12.37	2.26	0.59	0	0	0	0	0	2.09048		97.4386	0	97.4386
Lgam216	A	46.32	0.12	10.85	1.09	1.48	0	20.55	12.21	2.54	0.6				edenitic hornblende							Lgam216	A	46.32	0.12	10.85	1.09	1.64472	0	0	20.55	0	0		12.21	2.54	0.6	0	0	0	0	0	2.10822		98.0329	0	98.0329
OL5-73	A	46.4822	0.3614	10.4493	0.8026	2.8662	0.037	19.7687	12.0091	3.1275	0.6388				edenitic hornblende							OL5-73	A	46.4822	0.3614	10.4493	0.8026	2.46757	0.645767	0.037	19.7687	0	0		12.0091	3.1275	0.6388	0	0	0	0	0	2.11282		98.9028	0	98.9028
Lgam248	A	47.24	0.08	10.53	1.59	2.2	0.04	20.43	12.78	2.34	0.53				edenitic hornblende							Lgam248	A	47.24	0.08	10.53	1.59	2.44486	0	0.04	20.43	0	0		12.78	2.34	0.53	0	0	0	0	0	2.14651		100.151	0	100.151
OL5-72	A	46.1321	0.029	10.5833	1.645	2.2673	0.0314	19.4615	12.3071	2.5683	0.4955				edenitic hornblende							OL5-72	A	46.1321	0.029	10.5833	1.645	2.29049	0.206211	0.0314	19.4615	0	0		12.3071	2.5683	0.4955	0	0	0	0	0	2.09576		97.8457	0	97.8457
OL5-149	A	46.7529	0.0135	11.9857	1.4057	2.4191	0.0383	18.5841	12.5165	2.3952	0.8105				edenitic hornblende							OL5-149	A	46.7529	0.0135	11.9857	1.4057	0	2.4191	0.0383	18.5841	0	0		12.5165	2.3952	0.8105	0	0	0	0	0	2.11706		99.0386	0	99.0386
Lgam215	A	47.54	0.29	10.08	0.15	2.8	0.04	21.04	12.46	2.72	0.6				edenitic hornblende							Lgam215	A	47.54	0.29	10.08	0.15	3.11164	0	0.04	21.04	0	0		12.46	2.72	0.6	0	0	0	0	0	2.1484		100.18	0	100.18
Lgam166	A	47.4	0.04	11.09	1.48	3.03	0.04	18.81	12.71	2.42	0.69				edenitic hornblende							Lgam166	A	47.4	0.04	11.09	1.48	0.0801771	2.95785	0.04	18.81	0	0		12.71	2.42	0.69	0	0	0	0	0	2.12844		99.8465	0	99.8465
Lgam120	A	45.43	0.01	10.51	0.84	1.52	0	18.4	12.27	2.05	0.87				edenitic hornblende							Lgam120	A	45.43	0.01	10.51	0.84	0	1.52	0	18.4	0	0		12.27	2.05	0.87	0	0	0	0	0	2.01863		93.9186	0	93.9186
Lgam362	A	48.57	0	7.81	1.69	3.11	0.05	21.54	11.02	3.71	0.23				edenite	sodian						Lgam362	A	48.57	0	7.81	1.69	3.45614	0	0.05	21.54	0	0		11.02	3.71	0.23	0	0	0	0	0	2.14528		100.221	0	100.221
Lgam330	A	48.57	0.07	7.7	1.78	3.01	0.05	21.53	11.12	3.6	0.3				edenite							Lgam330	A	48.57	0.07	7.7	1.78	3.34501	0	0.05	21.53	0	0		11.12	3.6	0.3	0	0	0	0	0	2.14427		100.209	0	100.209
Lgam180	A	46.33	0.39	9.54	0.3	1.83	0.01	18.61	12.01	3.24	0.64				edenite							Lgam180	A	46.33	0.39	9.54	0.3	0	1.83	0.01	18.61	0	0		12.01	3.24	0.64	0	0	0	0	0	2.03591		94.9359	0	94.9359
OL5-102	A	48.2499	0.2236	7.8925	0.1408	6.7105	0.0739	20.2877	9.0826	3.0971	0.2136				edenite	subcalcic						OL5-102	A	48.2499	0.2236	7.8925	0.1408	7.45738	0	0.0739	20.2877	0	0		9.0826	3.0971	0.2136	0	0	0	0	0	2.11913		98.8382	0	98.8382
Lgam357	A	47.22	0.03	6.26	1.37	2.15	0	22.21	10.75	3.78	0.24				edenite	sodian						Lgam357	A	47.22	0.03	6.26	1.37	2.38929	0	0	22.21	0	0		10.75	3.78	0.24	0	0	0	0	0	2.06397		96.3133	0	96.3133
OL5-60	A	48.9252	0.0216	7.0219	1.741	2.9774	0.0525	21.131	10.8442	3.7895	0.2767				edenite	sodian						OL5-60	A	48.9252	0.0216	7.0219	1.741	3.30878	0	0.0525	21.131	0	0		10.8442	3.7895	0.2767	0	0	0	0	0	2.12644		99.2388	0	99.2388
Lgam316	A	49.47	0.09	6.61	1.88	3.14	0.05	21.74	10.51	3.9	0.33				edenite	sodian						Lgam316	A	49.47	0.09	6.61	1.88	3.48948	0	0.05	21.74	0	0		10.51	3.9	0.33	0	0	0	0	0	2.14628		100.216	0	100.216
OL5-109	A	49.6143	0.2178	7.8318	0.1368	6.3957	0.0873	19.1784	10.0421	3.3363	0.2358				magnesio-hornblende							OL5-109	A	49.6143	0.2178	7.8318	0.1368	7.10754	0	0.0873	19.1784	0	0		10.0421	3.3363	0.2358	0	0	0	0	0	2.14318		99.9313	0	99.9313
OL5-108	A	49.5173	0.2027	7.9389	0.1116	6.497	0.0983	19.1322	9.6445	3.4109	0.2195				magnesio-hornblende	subcalcic						OL5-108	A	49.5173	0.2027	7.9389	0.1116	7.22012	0	0.0983	19.1322	0	0		9.6445	3.4109	0.2195	0	0	0	0	0	2.13857		99.6346	0	99.6346
OL5-88	A	49.7428	0.1905	7.6726	0.1117	6.567	0.0909	19.4792	9.815	3.3485	0.2236				magnesio-hornblende	subcalcic						OL5-88	A	49.7428	0.1905	7.6726	0.1117	7.29791	0	0.0909	19.4792	0	0		9.815	3.3485	0.2236	0	0	0	0	0	2.14751		100.12	0	100.12
Lgam329	A	49.78	0.1	6.68	1.8	3.15	0.05	21.4	10.62	3.83	0.3				edenite	sodian						Lgam329	A	49.78	0.1	6.68	1.8	3.50059	0	0.05	21.4	0	0		10.62	3.83	0.3	0	0	0	0	0	2.14889		100.209	0	100.209
OL5-144	A	49.5561	0.1775	7.7318	0.1141	6.4664	0.0981	19.1245	9.7706	3.2874	0.2253				magnesio-hornblende	subcalcic						OL5-144	A	49.5561	0.1775	7.7318	0.1141	7.18611	0	0.0981	19.1245	0	0		9.7706	3.2874	0.2253	0	0	0	0	0	2.13395		99.4055	0	99.4055
Lgam355	A	49.43	0.19	7.36	0.08	6.3	0.07	19.84	9.77	2.91	0.24				magnesio-hornblende	subcalcic						Lgam355	A	49.43	0.19	7.36	0.08	7.00119	0	0.07	19.84	0	0		9.77	2.91	0.24	0	0	0	0	0	2.12803		99.0192	0	99.0192
OL5-130	A	49.7876	0.1698	7.6195	0.2013	6.4807	0.1008	19.3652	9.7814	3.2593	0.2135				magnesio-hornblende	subcalcic						OL5-130	A	49.7876	0.1698	7.6195	0.2013	7.202	0	0.1008	19.3652	0	0		9.7814	3.2593	0.2135	0	0	0	0	0	2.14324		99.8436	0	99.8436
Lgam324	A	50	0.11	6.71	1.84	3.14	0.06	21.25	10.44	3.89	0.31				edenite	sodian						Lgam324	A	50	0.11	6.71	1.84	3.48948	0	0.06	21.25	0	0		10.44	3.89	0.31	0	0	0	0	0	2.1515		100.251	0	100.251
OL5-103	A	50.0532	0.2017	7.8028	0.1299	6.4532	0.0908	19.1732	9.8345	3.3151	0.2356				magnesio-hornblende	subcalcic						OL5-103	A	50.0532	0.2017	7.8028	0.1299	7.17144	0	0.0908	19.1732	0	0		9.8345	3.3151	0.2356	0	0	0	0	0	2.15125		100.159	0	100.159
Lgam339	A	50.11	0.1	6.66	1.82	3.12	0.07	21.23	10.51	3.85	0.27				edenite	sodian						Lgam339	A	50.11	0.1	6.66	1.82	3.46726	0	0.07	21.23	0	0		10.51	3.85	0.27	0	0	0	0	0	2.15224		100.239	0	100.239
OL5-101	A	50.0945	0.1818	7.4625	0.1625	6.5381	0.0876	19.3031	9.8206	3.3416	0.222				magnesio-hornblende	subcalcic						OL5-101	A	50.0945	0.1818	7.4625	0.1625	7.26579	0	0.0876	19.3031	0	0		9.8206	3.3416	0.222	0	0	0	0	0	2.1485		100.09	0	100.09
OL5-24	A	50.4839	0.1986	7.6895	0.1449	6.4869	0.1034	19.3385	9.8304	3.3298	0.2242				magnesio-hornblende	subcalcic						OL5-24	A	50.4839	0.1986	7.6895	0.1449	7.20889	0	0.1034	19.3385	0	0		9.8304	3.3298	0.2242	0	0	0	0	0	2.16397		100.716	0	100.716
Lgam356	A	48.41	0.18	7.82	0.06	6.4	0.12	17.88	9.81	2.95	0.24				magnesio-hornblende							Lgam356	A	48.41	0.18	7.82	0.06	6.55606	0.500553	0.12	17.88	0	0		9.81	2.95	0.24	0	0	0	0	0	2.07396		96.6006	0	96.6006
Lgam331	A	49.46	0.17	6.67	0.11	6.38	0.1	19.6	9.54	3.02	0.29				magnesio-hornblende	subcalcic						Lgam331	A	49.46	0.17	6.67	0.11	7.09009	0	0.1	19.6	0	0		9.54	3.02	0.29	0	0	0	0	0	2.10855		98.1586	0	98.1586
Lgam232	A	50.05	0.56	4.96	0.31	9.3	0.1	18.66	8.21	5.01	0.56				magnesio-kataphorite	ferrian-						Lgam232	A	50.05	0.56	4.96	0.31	9.11102	1.10147	0.1	18.66	0	0		8.21	5.01	0.56	0	0	0	0	0	2.12756		100.76	0	100.76
Lgam346	A	50.75	0.09	5.94	1.68	3.18	0.06	21.73	10.08	3.95	0.26				edenite	sodian						Lgam346	A	50.75	0.09	5.94	1.68	3.53393	0	0.06	21.73	0	0		10.08	3.95	0.26	0	0	0	0	0	2.15573		100.23	0	100.23
Lgam242	A	50.08	0.54	5.01	0.3	9.32	0.11	18.58	8.25	5	0.54				magnesio-kataphorite	ferrian-						Lgam242	A	50.08	0.54	5.01	0.3	8.89182	1.31872	0.11	18.58	0	0		8.25	5	0.54	0	0	0	0	0	2.12691		100.747	0	100.747
Lgam363	A	51.02	0.13	5.57	1.53	2.77	0.06	22.13	10.58	3.72	0.22				edenite	sodian						Lgam363	A	51.02	0.13	5.57	1.53	3.0783	0	0.06	22.13	0	0		10.58	3.72	0.22	0	0	0	0	0	2.15753		100.196	0	100.196
Lgam354	A	51.01	0.12	5.54	1.55	2.81	0.05	21.99	10.61	3.78	0.24				edenite	sodian						Lgam354	A	51.01	0.12	5.54	1.55	3.12275	0	0.05	21.99	0	0		10.61	3.78	0.24	0	0	0	0	0	2.15585		100.169	0	100.169
Lgam300	A	51.06	0.2	5.44	1.56	2.56	0.04	21.96	11.03	3.52	0.38				edenite							Lgam300	A	51.06	0.2	5.44	1.56	2.84493	0	0.04	21.96	0	0		11.03	3.52	0.38	0	0	0	0	0	2.15554		100.19	0	100.19
OL5-47	A	51.0549	0.1829	5.5091	1.5264	2.8769	0.0552	21.6311	10.1366	4.4071	0.2062				edenite	sodian						OL5-47	A	51.0549	0.1829	5.5091	1.5264	3.1971	0	0.0552	21.6311	0	0		10.1366	4.4071	0.2062	0	0	0	0	0	2.15239		100.059	0	100.059
Lgam334	A	48.09	0.19	7.81	0.07	6.19	0.09	16.87	9.94	3.53	0.28				edenite	sodian						Lgam334	A	48.09	0.19	7.81	0.07	1.32341	4.99913	0.09	16.87	0	0		9.94	3.53	0.28	0	0	0	0	0	2.0273		95.2198	0	95.2198
Lgam259	A	49.59	0.2	4.99	1.36	2.04	0.02	21.94	9.76	4.18	0.48				edenite	sodian						Lgam259	A	49.59	0.2	4.99	1.36	2.26705	0	0.02	21.94	0	0		9.76	4.18	0.48	0	0	0	0	0	2.08607		96.8731	0	96.8731
Lgam323	A	51.3	0.04	5.2	1.73	3.01	0.06	22.1	9.74	4.25	0.31				edenite	subcalcic sodian						Lgam323	A	51.3	0.04	5.2	1.73	3.34501	0	0.06	22.1	0	0		9.74	4.25	0.31	0	0	0	0	0	2.15668		100.232	0	100.232
Lgam269	A	51.45	0.16	5.09	1.52	3.06	0.05	22.17	9.84	3.94	0.46				edenite	subcalcic sodian						Lgam269	A	51.45	0.16	5.09	1.52	3.40058	0	0.05	22.17	0	0		9.84	3.94	0.46	0	0	0	0	0	2.15796		100.239	0	100.239
Lgam345	A	51.53	0.1	5.46	1.47	2.9	0.05	21.86	10.31	3.8	0.26				edenite	sodian						Lgam345	A	51.53	0.1	5.46	1.47	3.22277	0	0.05	21.86	0	0		10.31	3.8	0.26	0	0	0	0	0	2.16111		100.224	0	100.224
Lgam299	A	51.56	0.12	5.21	1.31	3.2	0.06	21.95	9.84	4.08	0.38				edenite	subcalcic sodian						Lgam299	A	51.56	0.12	5.21	1.31	3.55616	0	0.06	21.95	0	0		9.84	4.08	0.38	0	0	0	0	0	2.15879		100.225	0	100.225
Lgam352	A	49.69	0.17	5.73	1.23	1.93	0.01	20.93	9.99	3.91	0.25				edenite	sodian						Lgam352	A	49.69	0.17	5.73	1.23	2.14481	0	0.01	20.93	0	0		9.99	3.91	0.25	0	0	0	0	0	2.07948		96.1343	0	96.1343
Lgam265	A	51.66	0.16	5.31	1.49	3.01	0.06	21.73	9.95	3.89	0.47				edenite	subcalcic sodian						Lgam265	A	51.66	0.16	5.31	1.49	3.34501	0	0.06	21.73	0	0		9.95	3.89	0.47	0	0	0	0	0	2.15977		100.225	0	100.225
Lgam289	A	51.7	0.36	4.06	0.81	3.11	0.06	23.04	10.66	3.51	0.4				edenite							Lgam289	A	51.7	0.36	4.06	0.81	3.45614	0	0.06	23.04	0	0		10.66	3.51	0.4	0	0	0	0	0	2.15704		100.213	0	100.213
Lgam344	A	51.85	0.11	5.01	1.49	2.8	0.06	22.13	10.04	3.98	0.26				edenite	subcalcic sodian						Lgam344	A	51.85	0.11	5.01	1.49	3.11164	0	0.06	22.13	0	0		10.04	3.98	0.26	0	0	0	0	0	2.16182		100.203	0	100.203
Lgam360	A	51.91	0.05	4.74	1.17	2.47	0.04	22.79	10.85	3.48	0.23				edenite							Lgam360	A	51.91	0.05	4.74	1.17	2.74491	0	0.04	22.79	0	0		10.85	3.48	0.23	0	0	0	0	0	2.16299		100.168	0	100.168
Lgam223	A	51.77	0.29	4.64	1.47	2.75	0.05	22.11	10.16	3.92	0.58				edenite	sodian						Lgam223	A	51.77	0.29	4.64	1.47	3.05607	0	0.05	22.11	0	0		10.16	3.92	0.58	0	0	0	0	0	2.15669		100.203	0	100.203
Lgam328	A	51.91	0.18	4.67	1.28	2.67	0.04	22.24	10.86	3.55	0.3				edenite							Lgam328	A	51.91	0.18	4.67	1.28	2.96717	0	0.04	22.24	0	0		10.86	3.55	0.3	0	0	0	0	0	2.15981		100.157	0	100.157
Lgam353	A	52.01	0.07	4.82	1.44	2.89	0.06	22.32	10.07	3.82	0.24				edenite	subcalcic sodian						Lgam353	A	52.01	0.07	4.82	1.44	3.21166	0	0.06	22.32	0	0		10.07	3.82	0.24	0	0	0	0	0	2.16345		100.225	0	100.225
OL5-44	A	51.643	0.0361	4.5503	1.5474	2.8321	0.0513	22.036	9.3698	4.8274	0.3199				edenite	subcalcic sodian						OL5-44	A	51.643	0.0361	4.5503	1.5474	3.14731	0	0.0513	22.036	0	0		9.3698	4.8274	0.3199	0	0	0	0	0	2.14571		99.6742	0	99.6742
Lgam359	A	52.07	0.05	4.74	1.21	2.5	0.06	22.51	10.92	3.43	0.23				edenite							Lgam359	A	52.07	0.05	4.74	1.21	2.77825	0	0.06	22.51	0	0		10.92	3.43	0.23	0	0	0	0	0	2.16339		100.162	0	100.162
Lgam322	A	52.07	0.16	4.83	1.44	3.1	0.05	22.05	9.54	4.21	0.32				edenite	subcalcic sodian						Lgam322	A	52.07	0.16	4.83	1.44	3.44503	0	0.05	22.05	0	0		9.54	4.21	0.32	0	0	0	0	0	2.16327		100.278	0	100.278
Lgam254	A	51.99	0.06	4.58	1.49	2.81	0.04	22.43	9.71	4.12	0.5				edenite	subcalcic sodian						Lgam254	A	51.99	0.06	4.58	1.49	3.12275	0	0.04	22.43	0	0		9.71	4.12	0.5	0	0	0	0	0	2.1595		100.202	0	100.202
Lgam257	A	52.04	0.05	4.55	1.47	2.88	0.06	22.39	9.75	4.05	0.49				edenite	subcalcic sodian						Lgam257	A	52.04	0.05	4.55	1.47	3.20054	0	0.06	22.39	0	0		9.75	4.05	0.49	0	0	0	0	0	2.15979		100.21	0	100.21
OL5-4	A	51.0685	0.5639	4.6676	0.2316	9.7549	0.105	17.6823	12.1357	1.023	0.038				magnesio-hornblende							OL5-4	A	51.0685	0.5639	4.6676	0.2316	5.97938	4.37438	0.105	17.6823	0	0		12.1357	1.023	0.038	0	0	0	0	0	2.117		99.9864	0	99.9864
Lgam349	A	52.26	0.1	4.79	1.21	2.89	0.06	22.35	9.94	3.89	0.25				edenite	subcalcic sodian						Lgam349	A	52.26	0.1	4.79	1.21	3.21166	0	0.06	22.35	0	0		9.94	3.89	0.25	0	0	0	0	0	2.16604		100.228	0	100.228
Lgam333	A	52.25	0.1	4.49	1.34	2.93	0.06	22.26	10.17	3.82	0.28				edenite	sodian						Lgam333	A	52.25	0.1	4.49	1.34	3.25611	0	0.06	22.26	0	0		10.17	3.82	0.28	0	0	0	0	0	2.16236		100.188	0	100.188
Lgam358	A	52.31	0.06	4.67	1.41	2.83	0.05	22.12	10	4.07	0.23				edenite	subcalcic sodian						Lgam358	A	52.31	0.06	4.67	1.41	3.14498	0	0.05	22.12	0	0		10	4.07	0.23	0	0	0	0	0	2.16427		100.229	0	100.229
Lgam342	A	52.35	0.14	4.94	1.4	2.74	0.06	21.88	9.96	4	0.26				edenite	subcalcic sodian						Lgam342	A	52.35	0.14	4.94	1.4	3.04496	0	0.06	21.88	0	0		9.96	4	0.26	0	0	0	0	0	2.16573		100.201	0	100.201
Lgam351	A	49.89	0.11	3.34	0.67	1.54	0	22.56	12.17	3.13	0.25				silicic edenite							Lgam351	A	49.89	0.11	3.34	0.67	0.79315	0.826286	0	22.56	0	0		12.17	3.13	0.25	0	0	0	0	0	2.06105		95.8005	0	95.8005
Lgam337	A	52.46	0.12	4.52	1.34	2.84	0.06	22.32	9.95	3.86	0.27				silicic edenite	subcalcic sodian						Lgam337	A	52.46	0.12	4.52	1.34	3.15609	0	0.06	22.32	0	0		9.95	3.86	0.27	0	0	0	0	0	2.16596		100.222	0	100.222
Lgam214	A	52.02	0.35	3.61	0.19	6.91	0.11	20.49	8.61	4.83	0.6				magnesio-kataphorite	ferrian-						Lgam214	A	52.02	0.35	3.61	0.19	7.55869	0.108332	0.11	20.49	0	0		8.61	4.83	0.6	0	0	0	0	0	2.14749		100.625	0	100.625
Lgam336	A	52.56	0.07	4.45	1.17	2.68	0.06	22.52	10.04	3.91	0.27				silicic edenite	subcalcic sodian						Lgam336	A	52.56	0.07	4.45	1.17	2.97828	0	0.06	22.52	0	0		10.04	3.91	0.27	0	0	0	0	0	2.16651		100.195	0	100.195
Lgam213	A	52.15	0.34	3.6	0.2	6.82	0.12	20.53	8.57	4.79	0.6				magnesio-kataphorite	ferrian-						Lgam213	A	52.15	0.34	3.6	0.2	7.57907	0	0.12	20.53	0	0		8.57	4.79	0.6	0	0	0	0	0	2.14955		100.629	0	100.629
Lgam341	A	52.55	0.03	4.63	1.55	2.92	0.06	22.04	9.31	4.37	0.26				silicic edenite	subcalcic sodian						Lgam341	A	52.55	0.03	4.63	1.55	3.245	0	0.06	22.04	0	0		9.31	4.37	0.26	0	0	0	0	0	2.16561		100.211	0	100.211
Lgam264	A	52.52	0.33	3.79	1.33	2.54	0.04	22.71	9.86	4.13	0.47				silicic edenite	subcalcic sodian						Lgam264	A	52.52	0.33	3.79	1.33	2.8227	0	0.04	22.71	0	0		9.86	4.13	0.47	0	0	0	0	0	2.16094		100.164	0	100.164
Lgam340	A	52.76	0.09	4.73	1.22	2.85	0.07	21.94	10.03	3.78	0.26				silicic edenite	subcalcic sodian						Lgam340	A	52.76	0.09	4.73	1.22	3.16721	0	0.07	21.94	0	0		10.03	3.78	0.26	0	0	0	0	0	2.16909		100.216	0	100.216
Lgam285	A	52.69	0.13	3.91	1.23	2.78	0.05	22.71	9.52	4.33	0.41				silicic edenite	subcalcic sodian						Lgam285	A	52.69	0.13	3.91	1.23	3.08941	0	0.05	22.71	0	0		9.52	4.33	0.41	0	0	0	0	0	2.16398		100.233	0	100.233
OL5-69	A	52.1728	0.2322	3.6915	1.0057	3.3976	0.0782	22.1609	8.6336	5.1896	0.36				silicic edenite	subcalcic sodian						OL5-69	A	52.1728	0.2322	3.6915	1.0057	3.77575	0	0.0782	22.1609	0	0		8.6336	5.1896	0.36	0	0	0	0	0	2.1418		99.4421	0	99.4421
OL5-128	A	53.8049	0.0352	26.7666	0.0587	1.3804	0.0477	1.1957	3.8059	1.5366	8.9306				anthophyllite	calcian alumino						OL5-128	A	53.8049	0.0352	26.7666	0.0587	0	1.3804	0.0477	1.1957	0	0		3.8059	1.5366	8.9306	0	0	0	0	0	2.20704		99.7693	0	99.7693
Lgam338	A	51.31	0.05	3.88	1.14	2.15	0.03	22.41	9.34	4.14	0.27				silicic edenite	subcalcic sodian						Lgam338	A	51.31	0.05	3.88	1.14	2.38929	0	0.03	22.41	0	0		9.34	4.14	0.27	0	0	0	0	0	2.10191		97.0612	0	97.0612
Lgam361	A	49.6	0.15	5.02	1.18	2.19	0.03	19.75	10.03	3.94	0.23				silicic edenite	sodian						Lgam361	A	49.6	0.15	5.02	1.18	0	2.19	0.03	19.75	0	0		10.03	3.94	0.23	0	0	0	0	0	2.02998		94.15	0	94.15
Lgam304	A	51.29	0.24	3.81	0.94	2.69	0.04	22.01	8.66	4.42	0.37				silicic edenite	subcalcic sodian						Lgam304	A	51.29	0.24	3.81	0.94	2.9894	0	0.04	22.01	0	0		8.66	4.42	0.37	0	0	0	0	0	2.09645		96.8658	0	96.8658
OL5-151	A	53.1198	0.1719	3.4394	0.9598	2.6495	0.062	23.159	9.5977	4.5625	0.1983				silicic edenite	subcalcic sodian						OL5-151	A	53.1198	0.1719	3.4394	0.9598	2.94439	0	0.062	23.159	0	0		9.5977	4.5625	0.1983	0	0	0	0	0	2.16997		100.385	0	100.385
OL5-98	A	52.5396	0.1153	3.5622	1.0364	2.5743	0.0562	22.6313	9.7503	4.2804	0.2111				silicic edenite	subcalcic sodian						OL5-98	A	52.5396	0.1153	3.5622	1.0364	2.86082	0	0.0562	22.6313	0	0		9.7503	4.2804	0.2111	0	0	0	0	0	2.14487		99.1885	0	99.1885
Lgam364	A	53.17	0.02	3.86	1.22	2.92	0.06	22.78	8.95	4.55	0.21				silicic edenite	subcalcic sodian						Lgam364	A	53.17	0.02	3.86	1.22	3.245	0	0.06	22.78	0	0		8.95	4.55	0.21	0	0	0	0	0	2.16995		100.235	0	100.235
OL5-58	A	53.0964	0.2346	3.5646	1.066	2.6097	0.0541	22.4689	9.7315	4.3397	0.4516				silicic edenite	subcalcic sodian						OL5-58	A	53.0964	0.2346	3.5646	1.066	2.90016	0	0.0541	22.4689	0	0		9.7315	4.3397	0.4516	0	0	0	0	0	2.16213		100.07	0	100.07
OL5-11	A	49.5201	0.5319	2.3225	0	26.5527	0.407	8.1234	9.6082	0.8211	0.2955				ferro-actinolitic hornblende	ferri-						OL5-11	A	49.5201	0.5319	2.3225	0	12.2253	15.5518	0.407	8.1234	0	0		9.6082	0.8211	0.2955	0	0	0	0	0	2.01399		101.421	0	101.421
Lgam119	A	53.11	0.5	3.06	0.75	3.44	0.06	22.28	9.93	3.72	0.88				silicic edenite	subcalcic sodian						Lgam119	A	53.11	0.5	3.06	0.75	3.82287	0	0.06	22.28	0	0		9.93	3.72	0.88	0	0	0	0	0	2.15965		100.273	0	100.273
Lgam199	A	52.97	0.32	3.15	0.18	6.65	0.11	20.54	8.45	4.76	0.61				magnesio-kataphorite							Lgam199	A	52.97	0.32	3.15	0.18	6.92317	0.420207	0.11	20.54	0	0		8.45	4.76	0.61	0	0	0	0	0	2.1529		100.586	0	100.586
Lgam212	A	53.21	0.32	2.91	0.24	5.88	0.11	21.41	8.52	4.55	0.6				magnesio-kataphorite							Lgam212	A	53.21	0.32	2.91	0.24	6.53444	0	0.11	21.41	0	0		8.52	4.55	0.6	0	0	0	0	0	2.1594		100.564	0	100.564
Lgam220	A	53.2	0.3	2.89	0.25	5.78	0.12	21.41	8.56	4.64	0.59				magnesio-kataphorite							Lgam220	A	53.2	0.3	2.89	0.25	6.42331	0	0.12	21.41	0	0		8.56	4.64	0.59	0	0	0	0	0	2.15853		100.542	0	100.542
OL5-67	A	52.7144	0.0911	3.4506	0.9871	2.4214	0.0533	22.3784	10.0563	3.9366	0.2728				silicic edenite	sodian						OL5-67	A	52.7144	0.0911	3.4506	0.9871	2.6909	0	0.0533	22.3784	0	0		10.0563	3.9366	0.2728	0	0	0	0	0	2.13862		98.7701	0	98.7701
Lgam298	A	53.5	0.14	3.41	0.93	2.6	0.06	22.92	10.12	3.67	0.38				silicic edenite	subcalcic						Lgam298	A	53.5	0.14	3.41	0.93	2.88938	0	0.06	22.92	0	0		10.12	3.67	0.38	0	0	0	0	0	2.17017		100.19	0	100.19
Lgam281	A	53.43	0.19	3.32	1.28	2.89	0.05	22.67	8.47	4.99	0.42				silicic edenite	subcalcic sodian						Lgam281	A	53.43	0.19	3.32	1.28	3.21166	0	0.05	22.67	0	0		8.47	4.99	0.42	0	0	0	0	0	2.16641		100.198	0	100.198
Lgam310	A	51.99	0.23	3.4	0.94	2.04	0.05	22.29	9.98	3.46	0.35				silicic edenite							Lgam310	A	51.99	0.23	3.4	0.94	2.26705	0	0.05	22.29	0	0		9.98	3.46	0.35	0	0	0	0	0	2.10612		97.0632	0	97.0632
Lgam309	A	53.62	0.14	3.45	0.89	2.59	0.06	22.89	10.14	3.6	0.35				silicic edenite	subcalcic						Lgam309	A	53.62	0.14	3.45	0.89	2.87827	0	0.06	22.89	0	0		10.14	3.6	0.35	0	0	0	0	0	2.172		100.19	0	100.19
OL5-86	A	47.5735	0.142	3.1722	1.1633	2.638	0.0489	19.4448	8.599	3.8613	0.2559				silicic edenite	subcalcic sodian						OL5-86	A	47.5735	0.142	3.1722	1.1633	2.93161	0	0.0489	19.4448	0	0		8.599	3.8613	0.2559	0	0	0	0	0	1.92691		89.1194	0	89.1194
Lgam327	A	53.57	0.19	3.36	1.28	2.86	0.07	22.66	8.52	4.92	0.3				silicic edenite	subcalcic sodian						Lgam327	A	53.57	0.19	3.36	1.28	3.17832	0	0.07	22.66	0	0		8.52	4.92	0.3	0	0	0	0	0	2.16933		100.218	0	100.218
Lgam280	A	53.56	0.17	3.27	1.34	2.86	0.05	22.63	8.42	5	0.42				silicic edenite	subcalcic sodian						Lgam280	A	53.56	0.17	3.27	1.34	3.17832	0	0.05	22.63	0	0		8.42	5	0.42	0	0	0	0	0	2.16734		100.206	0	100.206
Lgam350	A	52.04	0.14	3.65	0.69	2.78	0.04	21.44	9.24	4.52	0.25				silicic edenite	subcalcic sodian						Lgam350	A	52.04	0.14	3.65	0.69	3.08941	0	0.04	21.44	0	0		9.24	4.52	0.25	0	0	0	0	0	2.10525		97.2047	0	97.2047
Lgam238	A	53.65	0.1	3.49	0.97	2.67	0.07	22.67	9.54	4.05	0.55				silicic edenite	subcalcic sodian						Lgam238	A	53.65	0.1	3.49	0.97	2.96717	0	0.07	22.67	0	0		9.54	4.05	0.55	0	0	0	0	0	2.17027		100.227	0	100.227
OL5-92	A	52.8582	0.0473	3.1482	1.1316	2.5957	0.0515	22.3506	9.2327	4.5719	0.4024				silicic edenite	subcalcic sodian						OL5-92	A	52.8582	0.0473	3.1482	1.1316	2.8846	0	0.0515	22.3506	0	0		9.2327	4.5719	0.4024	0	0	0	0	0	2.13666		98.8157	0	98.8157
Lgam335	A	53.79	0.16	3.67	1.24	2.56	0.06	22.39	9.49	4.12	0.27				silicic edenite	subcalcic sodian						Lgam335	A	53.79	0.16	3.67	1.24	2.84493	0	0.06	22.39	0	0		9.49	4.12	0.27	0	0	0	0	0	2.17393		100.209	0	100.209
Lgam326	A	53.68	0.09	2.94	1.23	2.85	0.06	23.09	8.43	5.04	0.3				silicic edenite	subcalcic sodian						Lgam326	A	53.68	0.09	2.94	1.23	3.16721	0	0.06	23.09	0	0		8.43	5.04	0.3	0	0	0	0	0	2.16813		100.195	0	100.195
Lgam294	A	53.78	0.24	3.04	0.68	2.73	0.05	22.98	9.89	3.97	0.39				silicic edenite	subcalcic sodian						Lgam294	A	53.78	0.24	3.04	0.68	3.03385	0	0.05	22.98	0	0		9.89	3.97	0.39	0	0	0	0	0	2.17088		100.225	0	100.225
Lgam270	A	53.79	0.12	2.87	1.01	2.73	0.05	23.02	9.15	4.54	0.45				silicic edenite	subcalcic sodian						Lgam270	A	53.79	0.12	2.87	1.01	3.03385	0	0.05	23.02	0	0		9.15	4.54	0.45	0	0	0	0	0	2.16812		100.202	0	100.202
Lgam161	A	53.63	0.3	2.63	0.31	5.03	0.07	21.86	8.49	4.69	0.71				magnesio-kataphorite							Lgam161	A	53.63	0.3	2.63	0.31	5.58984	0	0.07	21.86	0	0		8.49	4.69	0.71	0	0	0	0	0	2.16125		100.441	0	100.441
Lgam211	A	53.66	0.23	2.66	0.33	5.11	0.09	21.78	9	4.26	0.6				silicic edenite	subcalcic sodian						Lgam211	A	53.66	0.23	2.66	0.33	5.67874	0	0.09	21.78	0	0		9	4.26	0.6	0	0	0	0	0	2.16241		100.451	0	100.451
Lgam278	A	53.87	0.34	2.86	1.02	2.59	0.06	22.96	9.39	4.22	0.43				silicic edenite	subcalcic sodian						Lgam278	A	53.87	0.34	2.86	1.02	2.87827	0	0.06	22.96	0	0		9.39	4.22	0.43	0	0	0	0	0	2.17024		100.199	0	100.199
Lgam273	A	53.87	0.29	2.99	1	2.57	0.05	22.74	9.71	4.08	0.44				silicic edenite	subcalcic sodian						Lgam273	A	53.87	0.29	2.99	1	2.85604	0	0.05	22.74	0	0		9.71	4.08	0.44	0	0	0	0	0	2.17002		100.196	0	100.196
OL5-40	A	52.5954	0.2387	2.3141	0.6513	9.0208	0.0991	18.9137	11.6114	0.3681	0.1001				tremolitic hornblende	ferrian-						OL5-40	A	52.5954	0.2387	2.3141	0.6513	9.00827	0.914733	0.0991	18.9137	0	0		11.6114	0.3681	0.1001	0	0	0	0	0	2.11832		98.9332	0	98.9332
Lgam237	A	53.72	0.3	2.97	0.3	5.62	0.11	21.06	8.51	4.58	0.55				magnesio-kataphorite							Lgam237	A	53.72	0.3	2.97	0.3	6.24551	0	0.11	21.06	0	0		8.51	4.58	0.55	0	0	0	0	0	2.16338		100.509	0	100.509
Lgam293	A	53.94	0.15	3.31	1.24	2.86	0.06	22.48	8.52	4.8	0.39				silicic edenite	subcalcic sodian						Lgam293	A	53.94	0.15	3.31	1.24	3.17832	0	0.06	22.48	0	0		8.52	4.8	0.39	0	0	0	0	0	2.17205		100.24	0	100.24
Lgam126	A	53.78	0.36	2.29	0.9	2.6	0.05	23.42	8.2	5.32	0.84				silicic edenite	subcalcic sodian						Lgam126	A	53.78	0.36	2.29	0.9	2.88938	0	0.05	23.42	0	0		8.2	5.32	0.84	0	0	0	0	0	2.16298		100.212	0	100.212
Lgam194	A	53.84	0.25	2.55	0.25	5.05	0.08	21.9	8.94	4.24	0.62				silicic edenite	subcalcic sodian						Lgam194	A	53.84	0.25	2.55	0.25	5.61206	0	0.08	21.9	0	0		8.94	4.24	0.62	0	0	0	0	0	2.16404		100.446	0	100.446
Lgam272	A	54.06	0.32	3.1	0.98	2.59	0.05	22.58	9.55	4.05	0.44				silicic edenite	subcalcic sodian						Lgam272	A	54.06	0.32	3.1	0.98	2.87827	0	0.05	22.58	0	0		9.55	4.05	0.44	0	0	0	0	0	2.17239		100.181	0	100.181
Lgam174	A	53.91	0.21	2.51	0.33	5.04	0.09	21.84	8.91	4.24	0.67				silicic edenite	subcalcic sodian						Lgam174	A	53.91	0.21	2.51	0.33	5.60095	0	0.09	21.84	0	0		8.91	4.24	0.67	0	0	0	0	0	2.16418		100.475	0	100.475
Lgam151	A	53.93	0.41	2.35	0.29	7.11	0.11	20.79	7.07	4.93	0.74				magnesio-kataphorite	ferrian-						Lgam151	A	53.93	0.41	2.35	0.29	7.90134	0	0.11	20.79	0	0		7.07	4.93	0.74	0	0	0	0	0	2.16158		100.683	0	100.683
Lgam276	A	54.25	0.17	2.7	0.76	2.48	0.06	23.04	10.22	3.63	0.43				silicic edenite							Lgam276	A	54.25	0.17	2.7	0.76	2.75602	0	0.06	23.04	0	0		10.22	3.63	0.43	0	0	0	0	0	2.173		100.189	0	100.189
Lgam268	A	54.29	0.15	2.61	0.96	2.46	0.06	23.3	8.96	4.5	0.46				silicic edenite	subcalcic sodian						Lgam268	A	54.29	0.15	2.61	0.96	2.7338	0	0.06	23.3	0	0		8.96	4.5	0.46	0	0	0	0	0	2.17304		100.197	0	100.197
Lgam158	A	53.16	0.35	1.88	0.57	2.15	0	23.74	8.84	4.46	0.72				silicic edenite	subcalcic sodian						Lgam158	A	53.16	0.35	1.88	0.57	2.38929	0	0	23.74	0	0		8.84	4.46	0.72	0	0	0	0	0	2.12744		98.2367	0	98.2367
Lgam277	A	54.16	0.04	1.74	1	2.81	0.07	24.04	8.02	5.33	0.43				silicic edenite	subcalcic sodian						Lgam277	A	54.16	0.04	1.74	1	3.12275	0	0.07	24.04	0	0		8.02	5.33	0.43	0	0	0	0	0	2.16539		100.118	0	100.118
OL5-46	A	53.7166	0.4228	2.5385	0.9392	2.7336	0.0433	22.1704	8.7956	4.7029	0.843				richterite							OL5-46	A	53.7166	0.4228	2.5385	0.9392	3.03785	0	0.0433	22.1704	0	0		8.7956	4.7029	0.843	0	0	0	0	0	2.14726		99.3574	0	99.3574
OL5-61	A	55.3478	0.3524	2.4301	0.9586	2.4015	0.0455	23.4265	9.6866	4.5078	0.5134				silicic edenite	subcalcic sodian						OL5-61	A	55.3478	0.3524	2.4301	0.9586	2.66879	0	0.0455	23.4265	0	0		9.6866	4.5078	0.5134	0	0	0	0	0	2.21246		102.15	0	102.15
OL5-74	A	54.0064	0.314	2.6242	1.0197	2.2266	0.0372	22.5551	9.5203	4.3371	0.4664				silicic edenite	subcalcic sodian						OL5-74	A	54.0064	0.314	2.6242	1.0197	2.47442	0	0.0372	22.5551	0	0		9.5203	4.3371	0.4664	0	0	0	0	0	2.15739		99.5122	0	99.5122
OL5-34	A	53.9557	0.2334	2.4503	0.8196	2.7268	0.0481	22.5693	8.6943	5.0845	0.5908				richterite							OL5-34	A	53.9557	0.2334	2.4503	0.8196	3.03029	0	0.0481	22.5693	0	0		8.6943	5.0845	0.5908	0	0	0	0	0	2.1549		99.6312	0	99.6312
OL5-90	A	54.3162	0.1472	2.5148	0.9642	2.5072	0.0599	22.6689	8.6718	5.4924	0.3891				richterite							OL5-90	A	54.3162	0.1472	2.5148	0.9642	2.78625	0	0.0599	22.6689	0	0		8.6718	5.4924	0.3891	0	0	0	0	0	2.16797		100.179	0	100.179
Lgam315	A	54.53	0.02	2.73	1	2.59	0.05	23.11	9.21	4.15	0.33				silicic edenite	subcalcic sodian						Lgam315	A	54.53	0.02	2.73	1	2.87827	0	0.05	23.11	0	0		9.21	4.15	0.33	0	0	0	0	0	2.17644		100.185	0	100.185
Lgam321	A	54.53	0.09	2.62	1.19	2.74	0.06	22.97	8.19	5.02	0.32				silicic edenite	subcalcic sodian						Lgam321	A	54.53	0.09	2.62	1.19	3.04496	0	0.06	22.97	0	0		8.19	5.02	0.32	0	0	0	0	0	2.17473		100.21	0	100.21
Lgam173	A	54.31	0.24	2.09	0.27	4.89	0.08	22.09	8.71	4.38	0.67				silicic edenite	subcalcic sodian						Lgam173	A	54.31	0.24	2.09	0.27	5.43426	0	0.08	22.09	0	0		8.71	4.38	0.67	0	0	0	0	0	2.16586		100.44	0	100.44
OL5-115	A	54.2418	0.181	2.2367	0.9252	2.6766	0.0391	22.7973	8.1814	5.8871	0.4179				richterite							OL5-115	A	54.2418	0.181	2.2367	0.9252	2.97451	0	0.0391	22.7973	0	0		8.1814	5.8871	0.4179	0	0	0	0	0	2.1631		100.045	0	100.045
Lgam303	A	53.46	0.04	3.13	0.67	1.65	0.01	22.78	9.25	4.16	0.37				silicic edenite	subcalcic sodian						Lgam303	A	53.46	0.04	3.13	0.67	1.83364	0	0.01	22.78	0	0		9.25	4.16	0.37	0	0	0	0	0	2.13184		97.8355	0	97.8355
Lgam210	A	54.45	0.19	2.46	0.9	2.7	0.05	22.82	9.3	4.28	0.6				silicic edenite	subcalcic sodian						Lgam210	A	54.45	0.19	2.46	0.9	3.00051	0	0.05	22.82	0	0		9.3	4.28	0.6	0	0	0	0	0	2.17123		100.222	0	100.222
Lgam096	A	54.28	0.41	2.08	0.31	4.22	0.07	22.31	8.31	4.68	1.08				richterite							Lgam096	A	54.28	0.41	2.08	0.31	4.68969	0	0.07	22.31	0	0		8.31	4.68	1.08	0	0	0	0	0	2.16362		100.383	0	100.383
Lgam235	A	54.48	0.24	2.21	0.67	2.86	0.06	23.15	8.98	4.55	0.55				silicic edenite	subcalcic sodian						Lgam235	A	54.48	0.24	2.21	0.67	3.17832	0	0.06	23.15	0	0		8.98	4.55	0.55	0	0	0	0	0	2.17134		100.24	0	100.24
Lgam275	A	54.61	0.17	2.53	0.71	2.82	0.07	23.14	8.95	4.31	0.43				silicic edenite	subcalcic sodian						Lgam275	A	54.61	0.17	2.53	0.71	3.13387	0	0.07	23.14	0	0		8.95	4.31	0.43	0	0	0	0	0	2.17616		100.23	0	100.23
Lgam102	A	54.29	0.39	2.05	0.31	4.34	0.06	22.22	8.29	4.74	1.02				richterite							Lgam102	A	54.29	0.39	2.05	0.31	4.82304	0	0.06	22.22	0	0		8.29	4.74	1.02	0	0	0	0	0	2.16288		100.356	0	100.356
OL5-31	A	54.4595	0.3945	2.3563	0.8261	2.6107	0.0546	22.5691	8.9055	4.9455	0.7568				richterite							OL5-31	A	54.4595	0.3945	2.3563	0.8261	2.82978	0.0643349	0.0546	22.5691	0	0		8.9055	4.9455	0.7568	0	0	0	0	0	2.16952		100.332	0	100.332
Lgam246	A	54.55	0.28	2.16	0.7	2.56	0.05	23.41	9.26	4.23	0.53				silicic edenite	subcalcic sodian						Lgam246	A	54.55	0.28	2.16	0.7	2.84493	0	0.05	23.41	0	0		9.26	4.23	0.53	0	0	0	0	0	2.173		100.188	0	100.188
Lgam095	A	54.36	0.38	2.1	0.32	4.23	0.08	22.19	8.39	4.63	1.08				richterite							Lgam095	A	54.36	0.38	2.1	0.32	4.7008	0	0.08	22.19	0	0		8.39	4.63	1.08	0	0	0	0	0	2.16416		100.395	0	100.395
Lgam094	A	54.37	0.4	2.1	0.32	4.21	0.07	22.2	8.39	4.58	1.08				richterite							Lgam094	A	54.37	0.4	2.1	0.32	4.67857	0	0.07	22.2	0	0		8.39	4.58	1.08	0	0	0	0	0	2.16394		100.353	0	100.353
Lgam284	A	54.71	0.19	2.6	0.71	2.83	0.06	22.9	8.97	4.37	0.41				silicic edenite	subcalcic sodian						Lgam284	A	54.71	0.19	2.6	0.71	3.14498	0	0.06	22.9	0	0		8.97	4.37	0.41	0	0	0	0	0	2.17704		100.242	0	100.242
OL5-66	A	55.5097	0.1692	1.9128	0.7372	2.4294	0.0499	24.0302	8.8318	5.1551	0.709				silicic edenite	subcalcic sodian						OL5-66	A	55.5097	0.1692	1.9128	0.7372	2.69979	0	0.0499	24.0302	0	0		8.8318	5.1551	0.709	0	0	0	0	0	2.20784		102.013	0	102.013
Lgam076	A	54.53	0.49	2.11	0.48	2.81	0.05	22.86	9.24	4.01	1.18				silicic edenite	subcalcic sodian						Lgam076	A	54.53	0.49	2.11	0.48	3.12275	0	0.05	22.86	0	0		9.24	4.01	1.18	0	0	0	0	0	2.16779		100.241	0	100.241
Lgam131	A	54.57	0.38	2.34	0.95	2.64	0.05	22.61	8.32	5.05	0.83				richterite							Lgam131	A	54.57	0.38	2.34	0.95	2.93383	0	0.05	22.61	0	0		8.32	5.05	0.83	0	0	0	0	0	2.16899		100.203	0	100.203
Lgam288	A	54.75	0.18	2.38	1.12	2.26	0.05	23.07	9.04	4.5	0.4				silicic edenite	subcalcic sodian						Lgam288	A	54.75	0.18	2.38	1.12	2.51154	0	0.05	23.07	0	0		9.04	4.5	0.4	0	0	0	0	0	2.17556		100.177	0	100.177
OL5-104	A	56.7775	0.3379	3.0204	0.9594	2.8607	0.0457	22.8275	9.8916	4.6383	0.4504				silicic edenite	subcalcic sodian						OL5-104	A	56.7775	0.3379	3.0204	0.9594	1.77223	1.26596	0.0457	22.8275	0	0		9.8916	4.6383	0.4504	0	0	0	0	0	2.25602		104.243	0	104.243
Lgam163	A	54.59	0.26	2.15	0.27	4.84	0.09	21.92	8.66	4.26	0.7				richterite							Lgam163	A	54.59	0.26	2.15	0.27	5.37869	0	0.09	21.92	0	0		8.66	4.26	0.7	0	0	0	0	0	2.16896		100.448	0	100.448
Lgam256	A	52.69	0.25	2.45	0.62	1.64	0.03	22.18	9.67	4.11	0.49				silicic edenite	subcalcic sodian						Lgam256	A	52.69	0.25	2.45	0.62	1.48413	0.304508	0.03	22.18	0	0		9.67	4.11	0.49	0	0	0	0	0	2.09241		96.371	0	96.371
Lgam105	A	54.61	0.35	2.05	0.16	4.3	0.07	22.19	9.1	3.96	0.96				silicic edenite	subcalcic sodian						Lgam105	A	54.61	0.35	2.05	0.16	4.77859	0	0.07	22.19	0	0		9.1	3.96	0.96	0	0	0	0	0	2.16795		100.397	0	100.397
Lgam137	A	54.71	0.21	2.21	0.85	2.66	0.05	22.86	8.89	4.5	0.81				silicic edenite	subcalcic sodian						Lgam137	A	54.71	0.21	2.21	0.85	2.95606	0	0.05	22.86	0	0		8.89	4.5	0.81	0	0	0	0	0	2.17079		100.217	0	100.217
Lgam230	A	54.79	0.25	2.21	0.85	2.56	0.06	22.96	8.92	4.56	0.56				silicic edenite	subcalcic sodian						Lgam230	A	54.79	0.25	2.21	0.85	2.84493	0	0.06	22.96	0	0		8.92	4.56	0.56	0	0	0	0	0	2.17318		100.178	0	100.178
Lgam103	A	54.5	0.41	2.35	0.55	3.93	0.08	21.7	9.14	4.06	1				silicic edenite	subcalcic sodian						Lgam103	A	54.5	0.41	2.35	0.55	3.48859	0.7908	0.08	21.7	0	0		9.14	4.06	1	0	0	0	0	0	2.16158		100.231	0	100.231
Lgam118	A	54.73	0.39	2.37	0.97	2.64	0.06	22.47	8.19	5.04	0.88				richterite							Lgam118	A	54.73	0.39	2.37	0.97	2.93383	0	0.06	22.47	0	0		8.19	5.04	0.88	0	0	0	0	0	2.17022		100.204	0	100.204
Lgam074	A	54.69	0.49	2.09	0.48	2.82	0.07	22.68	9.27	3.98	1.19				silicic edenite	subcalcic sodian						Lgam074	A	54.69	0.49	2.09	0.48	3.13387	0	0.07	22.68	0	0		9.27	3.98	1.19	0	0	0	0	0	2.16851		100.242	0	100.242
OL5-28	A	55.9835	0.1388	2.302	0.8887	2.4395	0.0587	23.4134	9.4178	4.597	0.5825				silicic edenite	subcalcic sodian						OL5-28	A	55.9835	0.1388	2.302	0.8887	2.71102	0	0.0587	23.4134	0	0		9.4178	4.597	0.5825	0	0	0	0	0	2.21927		102.313	0	102.313
Lgam189	A	54.86	0.34	2.21	0.73	2.66	0.06	22.82	9.48	3.95	0.63				silicic edenite	subcalcic sodian						Lgam189	A	54.86	0.34	2.21	0.73	2.95606	0	0.06	22.82	0	0		9.48	3.95	0.63	0	0	0	0	0	2.17452		100.211	0	100.211
OL5-78	A	55.5085	0.4411	2.035	0.8154	2.7055	0.0373	23.0012	8.7656	5.0322	0.8395				richterite							OL5-78	A	55.5085	0.4411	2.035	0.8154	3.00662	0	0.0373	23.0012	0	0		8.7656	5.0322	0.8395	0	0	0	0	0	2.20016		101.683	0	101.683
Lgam150	A	54.26	0.33	2.09	0.45	1.84	0.03	23.73	8.82	4.18	0.74				silicic edenite	subcalcic sodian						Lgam150	A	54.26	0.33	2.09	0.45	2.04479	0	0.03	23.73	0	0		8.82	4.18	0.74	0	0	0	0	0	2.15013		98.8249	0	98.8249
OL5-105	A	54.0898	0.1818	2.3395	0.9864	2.6882	0.0429	22.0226	8.0441	5.7923	0.467				richterite							OL5-105	A	54.0898	0.1818	2.3395	0.9864	2.44016	0.492427	0.0429	22.0226	0	0		8.0441	5.7923	0.467	0	0	0	0	0	2.14225		99.0412	0	99.0412
Lgam348	A	55.07	0.11	2.54	1.07	2.68	0.07	22.88	8.48	4.59	0.25				silicic edenite	subcalcic sodian						Lgam348	A	55.07	0.11	2.54	1.07	2.97828	0	0.07	22.88	0	0		8.48	4.59	0.25	0	0	0	0	0	2.18091		100.219	0	100.219
Lgam142	A	54.82	0.2	1.99	0.79	2.56	0.05	23.09	8.81	4.6	0.79				silicic edenite	subcalcic sodian						Lgam142	A	54.82	0.2	1.99	0.79	2.84493	0	0.05	23.09	0	0		8.81	4.6	0.79	0	0	0	0	0	2.17028		100.155	0	100.155
OL5-91	A	56.1645	0.3	1.726	0.2961	3.2029	0.0257	23.4942	8.7166	5.3484	1.6536				richterite	potassian-						OL5-91	A	56.1645	0.3	1.726	0.2961	2.75766	0.721429	0.0257	23.4942	0	0		8.7166	5.3484	1.6536	0	0	0	0	0	2.22308		103.427	0	103.427
Lgam282	A	52.99	0.33	3.25	0.87	1.63	0	21.28	9.65	4.02	0.42				silicic edenite	subcalcic sodian						Lgam282	A	52.99	0.33	3.25	0.87	0	1.63	0	21.28	0	0		9.65	4.02	0.42	0	0	0	0	0	2.09689		96.5369	0	96.5369
Lgam125	A	54.86	0.2	1.97	0.79	2.54	0.05	23	8.82	4.62	0.84				silicic edenite	subcalcic sodian						Lgam125	A	54.86	0.2	1.97	0.79	2.8227	0	0.05	23	0	0		8.82	4.62	0.84	0	0	0	0	0	2.16959		100.142	0	100.142
OL5-55	A	54.8054	0.1125	2.2557	0.8673	2.4668	0.0492	22.6732	9.1116	4.4668	0.5159				silicic edenite	subcalcic sodian						OL5-55	A	54.8054	0.1125	2.2557	0.8673	2.74135	0	0.0492	22.6732	0	0		9.1116	4.4668	0.5159	0	0	0	0	0	2.16612		99.7651	0	99.7651
Lgam188	A	54.98	0.31	1.92	0.8	2.57	0.06	23.07	8.3	5.1	0.63				richterite							Lgam188	A	54.98	0.31	1.92	0.8	2.85604	0	0.06	23.07	0	0		8.3	5.1	0.63	0	0	0	0	0	2.1729		100.199	0	100.199
OL5-83	A	54.7348	0.3688	1.918	0.726	2.6097	0.0449	22.6614	8.6615	4.9293	0.7816				richterite							OL5-83	A	54.7348	0.3688	1.918	0.726	2.90016	0	0.0449	22.6614	0	0		8.6615	4.9293	0.7816	0	0	0	0	0	2.16316		99.8896	0	99.8896
Lgam115	A	53.91	0.42	1.8	0.54	1.8	0.01	23.56	8.45	4.2	0.9				silicic edenite	subcalcic sodian						Lgam115	A	53.91	0.42	1.8	0.54	2.00034	0	0.01	23.56	0	0		8.45	4.2	0.9	0	0	0	0	0	2.12972		97.9201	0	97.9201
Lgam141	A	55.03	0.31	1.95	0.62	2.71	0.05	22.95	9.22	4.1	0.79				silicic edenite	subcalcic sodian						Lgam141	A	55.03	0.31	1.95	0.62	3.01162	0	0.05	22.95	0	0		9.22	4.1	0.79	0	0	0	0	0	2.1735		100.205	0	100.205
OL5-49	A	54.6111	0.1722	1.9882	0.9719	2.2938	0.0372	22.7147	8.5494	4.9914	0.8264				richterite							OL5-49	A	54.6111	0.1722	1.9882	0.9719	2.5491	0	0.0372	22.7147	0	0		8.5494	4.9914	0.8264	0	0	0	0	0	2.15688		99.5685	0	99.5685
Lgam176	A	55.02	0.3	1.88	0.84	2.56	0.05	23.07	8.35	5.01	0.65				richterite							Lgam176	A	55.02	0.3	1.88	0.84	2.84493	0	0.05	23.07	0	0		8.35	5.01	0.65	0	0	0	0	0	2.1729		100.188	0	100.188
OL5-68	A	54.7837	0.16	1.8182	1.1265	2.3657	0.0429	22.8249	7.1487	6.6391	0.7174				richterite							OL5-68	A	54.7837	0.16	1.8182	1.1265	2.629	0	0.0429	22.8249	0	0		7.1487	6.6391	0.7174	0	0	0	0	0	2.16335		100.054	0	100.054
OL5-75	A	56.0091	0.2137	1.0774	0.0959	3.5365	0.0436	23.9388	7.7166	6.1166	1.3977				richterite							OL5-75	A	56.0091	0.2137	1.0774	0.0959	3.93011	0	0.0436	23.9388	0	0		7.7166	6.1166	1.3977	0	0	0	0	0	2.21113		102.751	0	102.751
Lgam236	A	54.48	0.08	1.67	0.32	2.35	0.04	23.82	8.39	4.88	0.55				silicic edenite	subcalcic sodian						Lgam236	A	54.48	0.08	1.67	0.32	2.61156	0	0.04	23.82	0	0		8.39	4.88	0.55	0	0	0	0	0	2.15074		98.9923	0	98.9923
OL5-129	A	54.9761	0.0009	0.6164	0.3093	1.2424	0.0549	18.1783	24.936	0.1676	0.0011				tremolite							OL5-129	A	54.9761	0.0009	0.6164	0.3093	0	1.2424	0.0549	18.1783	0	0		24.936	0.1676	0.0011	0	0	0	0	0	2.1703		102.653	0	102.653
Lgam325	A	55.26	0.09	2.53	1.04	2.73	0.07	22.65	8.1	5	0.3				richterite							Lgam325	A	55.26	0.09	2.53	1.04	3.03385	0	0.07	22.65	0	0		8.1	5	0.3	0	0	0	0	0	2.18142		100.255	0	100.255
Lgam145	A	54.68	0.3	1.54	0.41	1.55	0.02	24.59	8.57	4.35	0.77				silicic edenite	subcalcic sodian						Lgam145	A	54.68	0.3	1.54	0.41	1.72251	0	0.02	24.59	0	0		8.57	4.35	0.77	0	0	0	0	0	2.15797		99.1105	0	99.1105
OL5-96	A	55.1088	0.1449	1.8891	0.8407	2.2343	0.0495	23.1051	8.6296	5.2238	0.6632				richterite							OL5-96	A	55.1088	0.1449	1.8891	0.8407	2.48298	0	0.0495	23.1051	0	0		8.6296	5.2238	0.6632	0	0	0	0	0	2.17446		100.312	0	100.312
Lgam169	A	55.15	0.05	2.15	1.04	2.62	0.06	22.94	7.93	5.12	0.68				richterite							Lgam169	A	55.15	0.05	2.15	1.04	2.91161	0	0.06	22.94	0	0		7.93	5.12	0.68	0	0	0	0	0	2.17504		100.207	0	100.207
Lgam241	A	55.13	0.13	1.82	0.81	2.42	0.06	23.19	8.65	4.97	0.54				silicic edenite	subcalcic sodian						Lgam241	A	55.13	0.13	1.82	0.81	2.68935	0	0.06	23.19	0	0		8.65	4.97	0.54	0	0	0	0	0	2.17351		100.163	0	100.163
Lgam099	A	54.94	0.2	1.58	0.07	3.24	0.04	22.94	7.86	5.83	1.05				richterite							Lgam099	A	54.94	0.2	1.58	0.07	3.60061	0	0.04	22.94	0	0		7.86	5.83	1.05	0	0	0	0	0	2.16536		100.276	0	100.276
Lgam292	A	55.29	0.05	1.93	1.04	2.42	0.05	23.36	8.6	4.61	0.39				silicic edenite	subcalcic sodian						Lgam292	A	55.29	0.05	1.93	1.04	2.68935	0	0.05	23.36	0	0		8.6	4.61	0.39	0	0	0	0	0	2.1789		100.188	0	100.188
Lgam198	A	55.28	0.2	1.98	0.67	2.19	0.03	23.24	9.94	3.6	0.61				silicic edenite	subcalcic						Lgam198	A	55.28	0.2	1.98	0.67	2.43375	0	0.03	23.24	0	0		9.94	3.6	0.61	0	0	0	0	0	2.17848		100.162	0	100.162
Lgam068	A	54.89	0.26	1.21	0.33	3.76	0.07	23.09	7.69	5.09	1.33				richterite							Lgam068	A	54.89	0.26	1.21	0.33	4.17849	0	0.07	23.09	0	0		7.69	5.09	1.33	0	0	0	0	0	2.16308		100.302	0	100.302
Lgam234	A	55.27	0.22	1.91	0.83	2.37	0.05	23.25	8.7	4.59	0.55				silicic edenite	subcalcic sodian						Lgam234	A	55.27	0.22	1.91	0.83	2.63378	0	0.05	23.25	0	0		8.7	4.59	0.55	0	0	0	0	0	2.17752		100.181	0	100.181
OL5-97	A	57.7881	0.2495	1.9177	0.7976	2.5941	0.0461	24.0053	8.7276	5.6878	0.5553				richterite							OL5-97	A	57.7881	0.2495	1.9177	0.7976	2.88282	0	0.0461	24.0053	0	0		8.7276	5.6878	0.5553	0	0	0	0	0	2.27604		104.934	0	104.934
Lgam140	A	53.27	0.37	2.41	0.7	1.98	0.03	21.69	8.81	4.32	0.8				silicic edenite	subcalcic sodian						Lgam140	A	53.27	0.37	2.41	0.7	1.55475	0.58096	0.03	21.69	0	0		8.81	4.32	0.8	0	0	0	0	0	2.09795		96.6337	0	96.6337
Lgam193	A	54.52	0.09	1.72	0.83	1.69	0.02	24.06	6.55	6.25	0.62				richterite							Lgam193	A	54.52	0.09	1.72	0.83	1.8781	0	0.02	24.06	0	0		6.55	6.25	0.62	0	0	0	0	0	2.14686		98.685	0	98.685
OL5-35	A	55.4521	0.0943	1.8455	1.1381	2.508	0.0407	22.767	6.6654	7.4283	0.4992				richterite							OL5-35	A	55.4521	0.0943	1.8455	1.1381	2.78714	0	0.0407	22.767	0	0		6.6654	7.4283	0.4992	0	0	0	0	0	2.18288		100.901	0	100.901
Lgam287	A	55.33	0.04	1.87	0.79	2.57	0.07	23.32	8.78	4.51	0.4				silicic edenite	subcalcic sodian						Lgam287	A	55.33	0.04	1.87	0.79	2.85604	0	0.07	23.32	0	0		8.78	4.51	0.4	0	0	0	0	0	2.17773		100.144	0	100.144
Lgam072	A	55.14	0.31	1.4	0.63	2.13	0.03	23.5	8.88	4.48	1.23				silicic edenite	subcalcic sodian						Lgam072	A	55.14	0.31	1.4	0.63	2.36707	0	0.03	23.5	0	0		8.88	4.48	1.23	0	0	0	0	0	2.16854		100.136	0	100.136
Lgam164	A	53.48	0.28	2.44	0.75	2.33	0.01	21.5	8.64	4.53	0.7				richterite							Lgam164	A	53.48	0.28	2.44	0.75	1.61829	0.873784	0.01	21.5	0	0		8.64	4.53	0.7	0	0	0	0	0	2.10279		96.9249	0	96.9249
Lgam245	A	55.39	0.21	1.74	0.4	2.79	0.05	23.14	9.36	4.12	0.53				silicic edenite	subcalcic sodian						Lgam245	A	55.39	0.21	1.74	0.4	3.10053	0	0.05	23.14	0	0		9.36	4.12	0.53	0	0	0	0	0	2.17773		100.218	0	100.218
OL5-94	A	55.231	0.173	1.9028	0.7776	2.4152	0.0459	22.7893	8.4383	5.1267	0.7454				richterite							OL5-94	A	55.231	0.173	1.9028	0.7776	2.68401	0	0.0459	22.7893	0	0		8.4383	5.1267	0.7454	0	0	0	0	0	2.1711		100.085	0	100.085
OL5-127	A	55.2959	0.2635	1.6169	0.5523	2.2532	0.0302	23.2231	8.5144	5.3646	0.6454				richterite							OL5-127	A	55.2959	0.2635	1.6169	0.5523	2.50398	0	0.0302	23.2231	0	0		8.5144	5.3646	0.6454	0	0	0	0	0	2.17334		100.184	0	100.184
Lgam187	A	55.46	0.22	1.96	0.7	2.15	0.03	23.12	9.87	3.6	0.63				silicic edenite	subcalcic						Lgam187	A	55.46	0.22	1.96	0.7	2.38929	0	0.03	23.12	0	0		9.87	3.6	0.63	0	0	0	0	0	2.17977		100.159	0	100.159
Lgam130	A	55.37	0.22	2.03	0.82	2.47	0.04	22.77	8.71	4.49	0.83				richterite							Lgam130	A	55.37	0.22	2.03	0.82	2.74491	0	0.04	22.77	0	0		8.71	4.49	0.83	0	0	0	0	0	2.17614		100.201	0	100.201
Lgam110	A	55.36	0.23	1.58	0.26	2.72	0.05	23.3	10.03	3.29	0.92				silicic edenite	subcalcic						Lgam110	A	55.36	0.23	1.58	0.26	3.02274	0	0.05	23.3	0	0		10.03	3.29	0.92	0	0	0	0	0	2.17557		100.218	0	100.218
Lgam101	A	55.29	0.3	1.98	0.78	2.1	0.04	22.82	8.64	4.75	1.03				richterite							Lgam101	A	55.29	0.3	1.98	0.78	2.33373	0	0.04	22.82	0	0		8.64	4.75	1.03	0	0	0	0	0	2.17275		100.136	0	100.136
Lgam067	A	55.2	0.35	1.71	0.71	2.77	0.06	22.69	8.46	4.44	1.35				richterite							Lgam067	A	55.2	0.35	1.71	0.71	3.0783	0	0.06	22.69	0	0		8.46	4.44	1.35	0	0	0	0	0	2.16896		100.217	0	100.217
Lgam165	A	53.89	0.17	1.84	0.58	1.76	0.03	22.63	8.47	5.08	0.69				richterite							Lgam165	A	53.89	0.17	1.84	0.58	1.95589	0	0.03	22.63	0	0		8.47	5.08	0.69	0	0	0	0	0	2.11698		97.4529	0	97.4529
Lgam055	A	54.87	0.19	1.45	0.09	4.16	0.03	22.24	8.23	4.82	1.69				richterite	potassian-						Lgam055	A	54.87	0.19	1.45	0.09	3.75969	0.776856	0.03	22.24	0	0		8.23	4.82	1.69	0	0	0	0	0	2.15547		100.302	0	100.302
OL5-93	A	55.6429	0.17	1.8985	0.7515	2.4817	0.0369	22.8926	8.4478	5.1493	0.8779				richterite							OL5-93	A	55.6429	0.17	1.8985	0.7515	2.75791	0	0.0369	22.8926	0	0		8.4478	5.1493	0.8779	0	0	0	0	0	2.18579		100.811	0	100.811
Lgam106	A	55.4	0.36	2	0.89	2.42	0.05	22.63	8.75	4.3	0.95				richterite							Lgam106	A	55.4	0.36	2	0.89	2.68935	0	0.05	22.63	0	0		8.75	4.3	0.95	0	0	0	0	0	2.17579		100.195	0	100.195
OL5-25	A	55.3393	0.4334	1.644	0.8064	2.434	0.0525	22.7852	8.4435	4.8773	1.0093				richterite							OL5-25	A	55.3393	0.4334	1.644	0.8064	2.7049	0	0.0525	22.7852	0	0		8.4435	4.8773	1.0093	0	0	0	0	0	2.17293		100.269	0	100.269
Lgam244	A	55.5	0.09	2.03	0.94	2.66	0.08	22.86	7.95	5.1	0.53				richterite							Lgam244	A	55.5	0.09	2.03	0.94	2.95606	0	0.08	22.86	0	0		7.95	5.1	0.53	0	0	0	0	0	2.17873		100.215	0	100.215
Lgam048	A	55	0.26	1.15	0.3	3.75	0.05	22.8	7.12	5.44	1.86				richterite	potassian-						Lgam048	A	55	0.26	1.15	0.3	4.16737	0	0.05	22.8	0	0		7.12	5.44	1.86	0	0	0	0	0	2.15895		100.306	0	100.306
Lgam179	A	55.15	0.16	1.62	0.72	1.65	0.01	24.29	7.13	5.58	0.64				richterite							Lgam179	A	55.15	0.16	1.62	0.72	1.83364	0	0.01	24.29	0	0		7.13	5.58	0.64	0	0	0	0	0	2.16416		99.2978	0	99.2978
Lgam172	A	55.5	0.08	1.97	1.04	2.65	0.05	22.85	7.76	5.2	0.67				richterite							Lgam172	A	55.5	0.08	1.97	1.04	2.94494	0	0.05	22.85	0	0		7.76	5.2	0.67	0	0	0	0	0	2.17779		100.243	0	100.243
Lgam122	A	55.25	0.23	1.32	0.37	5.53	0.08	21.71	7.15	5.23	0.86				richterite							Lgam122	A	55.25	0.23	1.32	0.37	6.14549	0	0.08	21.71	0	0		7.15	5.23	0.86	0	0	0	0	0	2.16758		100.513	0	100.513
Lgam146	A	55.44	0.16	1.47	0.73	2.4	0.07	23.5	8.1	5.12	0.76				richterite							Lgam146	A	55.44	0.16	1.47	0.73	2.66712	0	0.07	23.5	0	0		8.1	5.12	0.76	0	0	0	0	0	2.17473		100.192	0	100.192
Lgam143	A	55.48	0.21	1.58	0.63	2.62	0.07	23.22	8.74	4.4	0.78				silicic edenite	subcalcic sodian						Lgam143	A	55.48	0.21	1.58	0.63	2.91161	0	0.07	23.22	0	0		8.74	4.4	0.78	0	0	0	0	0	2.1759		100.198	0	100.198
Lgam343	A	52	0.08	2.99	0.71	1.79	0.03	20.24	9.97	3.72	0.26				silicic edenite	sodian						Lgam343	A	52	0.08	2.99	0.71	0	1.79	0.03	20.24	0	0		9.97	3.72	0.26	0	0	0	0	0	2.03892		93.8289	0	93.8289
Lgam113	A	55.46	0.24	1.4	0.56	2.44	0.04	23.52	8.44	4.75	0.9				richterite							Lgam113	A	55.46	0.24	1.4	0.56	2.71157	0	0.04	23.52	0	0		8.44	4.75	0.9	0	0	0	0	0	2.17452		100.196	0	100.196
Lgam086	A	55.43	0.2	1.18	0.49	2.16	0.04	23.88	9.09	4.17	1.11				silicic edenite	subcalcic sodian						Lgam086	A	55.43	0.2	1.18	0.49	2.40041	0	0.04	23.88	0	0		9.09	4.17	1.11	0	0	0	0	0	2.17272		100.163	0	100.163
Lgam231	A	54.2	0.24	1.75	0.51	1.58	0	23.04	8.52	4.83	0.56				silicic edenite	subcalcic sodian						Lgam231	A	54.2	0.24	1.75	0.51	1.75585	0	0	23.04	0	0		8.52	4.83	0.56	0	0	0	0	0	2.12443		97.5303	0	97.5303
Lgam147	A	54.19	0.13	1.8	0.55	1.39	0	23.59	8.55	4.03	0.76				silicic edenite	subcalcic sodian						Lgam147	A	54.19	0.13	1.8	0.55	1.54471	0	0	23.59	0	0		8.55	4.03	0.76	0	0	0	0	0	2.12334		97.268	0	97.268
Lgam332	A	55.74	0.12	1.86	0.78	2.42	0.05	23.34	8.65	4.47	0.28				silicic edenite	subcalcic sodian						Lgam332	A	55.74	0.12	1.86	0.78	2.68935	0	0.05	23.34	0	0		8.65	4.47	0.28	0	0	0	0	0	2.184		100.163	0	100.163
Lgam046	A	55.24	0.25	1.35	0.56	1.77	0.01	23.52	8.23	4.92	1.9				richterite	potassian-						Lgam046	A	55.24	0.25	1.35	0.56	1.967	0	0.01	23.52	0	0		8.23	4.92	1.9	0	0	0	0	0	2.16407		100.111	0	100.111
Lgam108	A	55.38	0.26	1.36	0.37	5.57	0.09	21.66	7.11	5	0.93				richterite							Lgam108	A	55.38	0.26	1.36	0.37	6.18994	0	0.09	21.66	0	0		7.11	5	0.93	0	0	0	0	0	2.16939		100.519	0	100.519
OL5-26	A	53.8983	0.3547	1.5447	0.6863	2.0342	0.0271	22.6713	7.8498	4.8482	0.9191				richterite							OL5-26	A	53.8983	0.3547	1.5447	0.6863	2.26061	0	0.0271	22.6713	0	0		7.8498	4.8482	0.9191	0	0	0	0	0	2.11122		97.1713	0	97.1713
Lgam250	A	54.23	0.14	2.73	0.62	1.64	0	22.11	8.53	4.35	0.51				silicic edenite	subcalcic sodian						Lgam250	A	54.23	0.14	2.73	0.62	1.82253	0	0	22.11	0	0		8.53	4.35	0.51	0	0	0	0	0	2.1241		97.1666	0	97.1666
Lgam123	A	54.12	0.16	1.7	0.71	1.7	0.04	22.67	8.63	4.64	0.86				silicic edenite	subcalcic sodian						Lgam123	A	54.12	0.16	1.7	0.71	1.88921	0	0.04	22.67	0	0		8.63	4.64	0.86	0	0	0	0	0	2.11956		97.5388	0	97.5388
Lgam222	A	55.63	0.1	1.55	1.01	2.43	0.04	23.43	7.52	5.47	0.58				richterite							Lgam222	A	55.63	0.1	1.55	1.01	2.70046	0	0.04	23.43	0	0		7.52	5.47	0.58	0	0	0	0	0	2.1783		100.209	0	100.209
Lgam116	A	54.54	0.18	1.71	0.46	1.43	0.03	23.58	8.41	4.48	0.89				silicic edenite	subcalcic sodian						Lgam116	A	54.54	0.18	1.71	0.46	1.58916	0	0.03	23.58	0	0		8.41	4.48	0.89	0	0	0	0	0	2.13558		98.0047	0	98.0047
Lgam088	A	55.47	0.15	1.39	0.78	2.43	0.03	23.37	7.74	5.3	1.1				richterite							Lgam088	A	55.47	0.15	1.39	0.78	2.70046	0	0.03	23.37	0	0		7.74	5.3	1.1	0	0	0	0	0	2.17184		100.202	0	100.202
Lgam107	A	55.6	0.33	1.49	0.63	2.07	0.04	23.44	9.18	4	0.94				silicic edenite	subcalcic sodian						Lgam107	A	55.6	0.33	1.49	0.63	2.30039	0	0.04	23.44	0	0		9.18	4	0.94	0	0	0	0	0	2.17668		100.127	0	100.127
Lgam240	A	56.28	0.1	1.68	0.96	2.09	0.01	24.61	6.6	5.56	0.54				richterite							Lgam240	A	56.28	0.1	1.68	0.96	2.32262	0	0.01	24.61	0	0		6.6	5.56	0.54	0	0	0	0	0	2.20247		100.865	0	100.865
Lgam247	A	54.44	0.34	2.28	0.61	1.7	0.03	22.17	9.19	4.18	0.53				silicic edenite	subcalcic sodian						Lgam247	A	54.44	0.34	2.28	0.61	1.41103	0.430291	0.03	22.17	0	0		9.19	4.18	0.53	0	0	0	0	0	2.13034		97.7417	0	97.7417
OL5-114	A	53.385	0.2646	2.4968	0.9729	2.6503	0.0508	20.7782	8.7512	4.5103	0.572				silicic edenite	subcalcic sodian						OL5-114	A	53.385	0.2646	2.4968	0.9729	0.227213	2.44584	0.0508	20.7782	0	0		8.7512	4.5103	0.572	0	0	0	0	0	2.08809		96.543	0	96.543
Lgam038	A	55.17	0.2	0.62	0.24	1.95	0.03	24.33	7.18	5.87	2.15				richterite	potassian-						Lgam038	A	55.17	0.2	0.62	0.24	2.16703	0	0.03	24.33	0	0		7.18	5.87	2.15	0	0	0	0	0	2.15782		100.115	0	100.115
Lgam092	A	55.22	0.19	1.33	0.58	1.67	0.01	24.32	8.18	4.19	1.09				silicic edenite	subcalcic sodian						Lgam092	A	55.22	0.19	1.33	0.58	1.85587	0	0.01	24.32	0	0		8.18	4.19	1.09	0	0	0	0	0	2.15948		99.1253	0	99.1253
OL5-59	A	54.5915	0.2236	1.4692	0.7807	2.2014	0.0507	22.51	8.0145	5.1036	1.163				richterite							OL5-59	A	54.5915	0.2236	1.4692	0.7807	2.44642	0	0.0507	22.51	0	0		8.0145	5.1036	1.163	0	0	0	0	0	2.13386		98.4871	0	98.4871
Lgam021	A	55.13	0.28	0.56	0.13	2.17	0.02	24.07	7.18	5.56	2.6				richterite	potassian-						Lgam021	A	55.13	0.28	0.56	0.13	2.41152	0	0.02	24.07	0	0		7.18	5.56	2.6	0	0	0	0	0	2.15352		100.095	0	100.095
Lgam097	A	55.77	0.24	1.17	0.49	2.15	0.05	23.91	9.06	3.83	1.06				silicic edenite	subcalcic sodian						Lgam097	A	55.77	0.24	1.17	0.49	2.38929	0	0.05	23.91	0	0		9.06	3.83	1.06	0	0	0	0	0	2.17753		100.147	0	100.147
Lgam056	A	55.51	0.31	1.07	0.45	2.78	0.04	23.16	7.5	5.23	1.66				richterite	potassian-						Lgam056	A	55.51	0.31	1.07	0.45	3.08941	0	0.04	23.16	0	0		7.5	5.23	1.66	0	0	0	0	0	2.16571		100.185	0	100.185
Lgam077	A	55.77	0.28	1.29	0.59	2.17	0.05	23.34	8.99	4.1	1.16				silicic edenite	subcalcic sodian						Lgam077	A	55.77	0.28	1.29	0.59	2.41152	0	0.05	23.34	0	0		8.99	4.1	1.16	0	0	0	0	0	2.17514		100.157	0	100.157
Lgam157	A	55.81	0.18	1.48	0.63	2.53	0.05	23.03	7.84	5.46	0.72				richterite							Lgam157	A	55.81	0.18	1.48	0.63	2.81159	0	0.05	23.03	0	0		7.84	5.46	0.72	0	0	0	0	0	2.17655		100.188	0	100.188
Lgam117	A	55.8	0.15	1.04	0.57	2.16	0.05	23.95	8.12	5.01	0.88				richterite							Lgam117	A	55.8	0.15	1.04	0.57	2.40041	0	0.05	23.95	0	0		8.12	5.01	0.88	0	0	0	0	0	2.17602		100.146	0	100.146
OL5-29	A	54.7116	0.2169	1.3115	0.6765	2.206	0.0372	22.5822	7.9864	5.3652	0.9043				richterite							OL5-29	A	54.7116	0.2169	1.3115	0.6765	2.39496	0.050899	0.0372	22.5822	0	0		7.9864	5.3652	0.9043	0	0	0	0	0	2.13343		98.3711	0	98.3711
Lgam100	A	55.79	0.23	0.9	0.46	1.99	0.04	24.11	8.53	4.65	1.03				silicic edenite	subcalcic sodian						Lgam100	A	55.79	0.23	0.9	0.46	2.21149	0	0.04	24.11	0	0		8.53	4.65	1.03	0	0	0	0	0	2.17504		100.127	0	100.127
Lgam075	A	55.8	0.28	1.41	0.65	2.16	0.03	23.11	8.48	4.64	1.18				richterite							Lgam075	A	55.8	0.28	1.41	0.65	2.40041	0	0.03	23.11	0	0		8.48	4.64	1.18	0	0	0	0	0	2.17463		100.155	0	100.155
Lgam034	A	55.39	0.21	0.8	0.1	2.76	0.03	23.39	7.16	5.69	2.2				richterite	potassian-						Lgam034	A	55.39	0.21	0.8	0.1	3.06719	0	0.03	23.39	0	0		7.16	5.69	2.2	0	0	0	0	0	2.15858		100.196	0	100.196
Lgam062	A	55.61	0.32	0.86	0.5	2.52	0.05	23.53	6.85	6.04	1.46				richterite	potassian-						Lgam062	A	55.61	0.32	0.86	0.5	2.80048	0	0.05	23.53	0	0		6.85	6.04	1.46	0	0	0	0	0	2.16699		100.187	0	100.187
OL5-89	A	55.5973	0.2253	1.3546	0.6024	2.2327	0.0456	22.9616	7.8308	5.5936	0.9672				richterite							OL5-89	A	55.5973	0.2253	1.3546	0.6024	2.4812	0	0.0456	22.9616	0	0		7.8308	5.5936	0.9672	0	0	0	0	0	2.16595		99.8256	0	99.8256
OL5-53	A	55.6394	0.2466	1.1008	0.1363	3.6781	0.0391	22.5445	7.2537	5.9335	1.6016				richterite	potassian-						OL5-53	A	55.6394	0.2466	1.1008	0.1363	3.17419	0.82181	0.0391	22.5445	0	0		7.2537	5.9335	1.6016	0	0	0	0	0	2.1669		100.658	0	100.658
OL5-71	A	55.7787	0.1845	1.3513	0.6868	2.2689	0.0518	22.9964	8.2883	5.1062	0.9093				richterite							OL5-71	A	55.7787	0.1845	1.3513	0.6868	2.52143	0	0.0518	22.9964	0	0		8.2883	5.1062	0.9093	0	0	0	0	0	2.1722		100.047	0	100.047
Lgam070	A	55.76	0.2	0.78	0.59	2.2	0.05	23.93	6.97	6	1.28				richterite							Lgam070	A	55.76	0.2	0.78	0.59	2.44486	0	0.05	23.93	0	0		6.97	6	1.28	0	0	0	0	0	2.17031		100.175	0	100.175
Lgam195	A	53.71	0.14	2.15	0.64	1.9	0.04	21.59	9.04	3.55	0.62				tremolite	subcalcic						Lgam195	A	53.71	0.14	2.15	0.64	2.11147	0	0.04	21.59	0	0		9.04	3.55	0.62	0	0	0	0	0	2.09		95.6815	0	95.6815
Lgam047	A	55.66	0.25	1.09	0.42	1.95	0.04	23.31	7.95	5.19	1.87				richterite	potassian-						Lgam047	A	55.66	0.25	1.09	0.42	2.16703	0	0.04	23.31	0	0		7.95	5.19	1.87	0	0	0	0	0	2.16531		100.112	0	100.112
OL5-62	A	55.4879	0.2245	1.3439	0.6234	2.2352	0.0345	22.7742	7.8239	5.6687	1.0192				richterite							OL5-62	A	55.4879	0.2245	1.3439	0.6234	2.02899	0.40942	0.0345	22.7742	0	0		7.8239	5.6687	1.0192	0	0	0	0	0	2.15849		99.5971	0	99.5971
OL5-45	A	54.4617	0.1747	1.5765	0.7707	2.2527	0.0483	22.027	7.9743	5.0349	1.1716				richterite							OL5-45	A	54.4617	0.1747	1.5765	0.7707	1.68379	0.737543	0.0483	22.027	0	0		7.9743	5.0349	1.1716	0	0	0	0	0	2.11788		97.7789	0	97.7789
Lgam114	A	54.8	0.22	1.36	0.48	1.75	0.03	22.95	7.93	5.19	0.9				richterite							Lgam114	A	54.8	0.22	1.36	0.48	1.94477	0	0.03	22.95	0	0		7.93	5.19	0.9	0	0	0	0	0	2.13073		97.9355	0	97.9355
Lgam061	A	55.82	0.21	1.29	0.23	2.07	0.03	23.24	8.37	4.99	1.51				richterite	potassian-						Lgam061	A	55.82	0.21	1.29	0.23	2.055	0.220813	0.03	23.24	0	0		8.37	4.99	1.51	0	0	0	0	0	2.17		100.136	0	100.136
Lgam059	A	55.82	0.3	1.02	0.46	2.74	0.05	23.17	7.38	5.24	1.57				richterite	potassian-						Lgam059	A	55.82	0.3	1.02	0.46	3.04496	0	0.05	23.17	0	0		7.38	5.24	1.57	0	0	0	0	0	2.16995		100.225	0	100.225
Lgam073	A	55.93	0.18	1.06	0.57	2.4	0.04	23.43	7.98	4.95	1.2				richterite							Lgam073	A	55.93	0.18	1.06	0.57	2.66712	0	0.04	23.43	0	0		7.98	4.95	1.2	0	0	0	0	0	2.17411		100.181	0	100.181
Lgam308	A	56.2	0.05	1.03	0.88	2.84	0.07	23.95	6.44	5.91	0.35				richterite							Lgam308	A	56.2	0.05	1.03	0.88	3.15609	0	0.07	23.95	0	0		6.44	5.91	0.35	0	0	0	0	0	2.18389		100.22	0	100.22
Lgam049	A	55.75	0.22	0.86	0.37	2.05	0.04	23.63	7.51	5.48	1.85				richterite	potassian-						Lgam049	A	55.75	0.22	0.86	0.37	2.27816	0	0.04	23.63	0	0		7.51	5.48	1.85	0	0	0	0	0	2.1662		100.154	0	100.154
OL5-77	A	55.4852	0.2614	0.8748	0.0773	3.1633	0.0448	22.8146	6.9256	6.4281	2.0031				richterite	potassian-						OL5-77	A	55.4852	0.2614	0.8748	0.0773	1.97015	1.39047	0.0448	22.8146	0	0		6.9256	6.4281	2.0031	0	0	0	0	0	2.15585		100.431	0	100.431
Lgam063	A	55.94	0.25	1.11	0.61	2.04	0.04	23.39	7.61	5.3	1.45				richterite	potassian-						Lgam063	A	55.94	0.25	1.11	0.61	2.26705	0	0.04	23.39	0	0		7.61	5.3	1.45	0	0	0	0	0	2.17219		100.139	0	100.139
Lgam035	A	55.68	0.2	0.7	0.05	2.74	0.04	23.38	7.2	5.58	2.19				richterite	potassian-						Lgam035	A	55.68	0.2	0.7	0.05	3.04496	0	0.04	23.38	0	0		7.2	5.58	2.19	0	0	0	0	0	2.16154		100.227	0	100.227
OL5-139	A	55.2323	0.3256	0.7946	0.1473	2.2868	0.0236	23.1188	6.9496	6.374	1.9803				richterite	potassian-						OL5-139	A	55.2323	0.3256	0.7946	0.1473	1.56916	0.874797	0.0236	23.1188	0	0		6.9496	6.374	1.9803	0	0	0	0	0	2.14337		99.5334	0	99.5334
Lgam136	A	56.26	0.13	1.35	0.46	2.02	0.05	23.43	9.38	3.85	0.81				silicic edenite	subcalcic sodian						Lgam136	A	56.26	0.13	1.35	0.46	2.24483	0	0.05	23.43	0	0		9.38	3.85	0.81	0	0	0	0	0	2.18303		100.148	0	100.148
Lgam091	A	56.04	0.17	1.16	0.52	2.52	0.06	23.05	8.09	5	1.09				richterite							Lgam091	A	56.04	0.17	1.16	0.52	2.80048	0	0.06	23.05	0	0		8.09	5	1.09	0	0	0	0	0	2.17437		100.155	0	100.155
OL5-26	A	55.5532	0.3975	1.5938	0.7955	2.3722	0.0483	22.1537	8.3719	4.6578	1.0013				richterite							OL5-26	A	55.5532	0.3975	1.5938	0.7955	1.65879	0.879545	0.0483	22.1537	0	0		8.3719	4.6578	1.0013	0	0	0	0	0	2.15451		99.2658	0	99.2658
Lgam051	A	55.91	0.2	0.93	0.36	2.15	0.03	23.39	7.64	5.38	1.78				richterite	potassian-						Lgam051	A	55.91	0.2	0.93	0.36	2.38929	0	0.03	23.39	0	0		7.64	5.38	1.78	0	0	0	0	0	2.16827		100.178	0	100.178
Lgam134	A	56.17	0.23	1.13	0.59	2.47	0.04	23.2	7.33	5.77	0.82				richterite							Lgam134	A	56.17	0.23	1.13	0.59	2.74491	0	0.04	23.2	0	0		7.33	5.77	0.82	0	0	0	0	0	2.17807		100.203	0	100.203
Lgam302	A	56.4	0.04	1.05	0.94	2.82	0.08	23.81	6.39	5.86	0.37				richterite							Lgam302	A	56.4	0.04	1.05	0.94	3.13387	0	0.08	23.81	0	0		6.39	5.86	0.37	0	0	0	0	0	2.1862		100.26	0	100.26
Lgam307	A	56.42	0.06	1.15	0.96	2.82	0.08	23.68	6.47	5.74	0.35				richterite							Lgam307	A	56.42	0.06	1.15	0.96	3.13387	0	0.08	23.68	0	0		6.47	5.74	0.35	0	0	0	0	0	2.18663		100.23	0	100.23
Lgam320	A	56.39	0.05	0.95	0.8	2.91	0.07	23.9	6.5	5.81	0.32				richterite							Lgam320	A	56.39	0.05	0.95	0.8	3.23388	0	0.07	23.9	0	0		6.5	5.81	0.32	0	0	0	0	0	2.18526		100.209	0	100.209
Lgam030	A	55.8	0.27	0.54	0.16	1.91	0.02	23.95	7.02	5.76	2.31				richterite	potassian-						Lgam030	A	55.8	0.27	0.54	0.16	2.12258	0	0.02	23.95	0	0		7.02	5.76	2.31	0	0	0	0	0	2.1621		100.115	0	100.115
Lgam050	A	55.86	0.2	0.36	0.48	2.25	0.03	24.12	6.06	6.53	1.83				richterite	potassian-						Lgam050	A	55.86	0.2	0.36	0.48	2.50042	0	0.03	24.12	0	0		6.06	6.53	1.83	0	0	0	0	0	2.16439		100.135	0	100.135
Lgam058	A	54.45	0.24	1.12	0.13	2.8	0.02	22.34	7.27	4.93	1.61				richterite	potassian-						Lgam058	A	54.45	0.24	1.12	0.13	3.11164	0	0.02	22.34	0	0		7.27	4.93	1.61	0	0	0	0	0	2.10966		97.3313	0	97.3313
Lgam312	A	56.41	0.06	0.98	0.82	2.85	0.07	23.88	6.45	5.85	0.34				richterite							Lgam312	A	56.41	0.06	0.98	0.82	3.16721	0	0.07	23.88	0	0		6.45	5.85	0.34	0	0	0	0	0	2.18558		100.213	0	100.213
Lgam019	A	55.73	0.28	0.51	0.18	2.33	0.03	23.68	6.72	5.68	2.61				richterite	potassian-						Lgam019	A	55.73	0.28	0.51	0.18	2.58933	0	0.03	23.68	0	0		6.72	5.68	2.61	0	0	0	0	0	2.15911		100.168	0	100.168
Lgam084	A	56.14	0.22	0.91	0.51	2.25	0.04	23.57	7.24	5.71	1.13				richterite							Lgam084	A	56.14	0.22	0.91	0.51	2.50042	0	0.04	23.57	0	0		7.24	5.71	1.13	0	0	0	0	0	2.17494		100.145	0	100.145
OL5-39	A	55.9482	0.1453	1.0571	0.5366	2.1624	0.0368	23.1532	7.9833	5.4916	0.7803				richterite							OL5-39	A	55.9482	0.1453	1.0571	0.5366	2.40308	0	0.0368	23.1532	0	0		7.9833	5.4916	0.7803	0	0	0	0	0	2.16742		99.7029	0	99.7029
Lgam054	A	56	0.27	0.91	0.39	2.11	0.03	23.34	7.42	5.55	1.71				richterite	potassian-						Lgam054	A	56	0.27	0.91	0.39	2.34484	0	0.03	23.34	0	0		7.42	5.55	1.71	0	0	0	0	0	2.16886		100.134	0	100.134
Lgam111	A	55.89	0.12	1.01	0.43	1.56	0.01	24.28	7.79	4.84	0.9				richterite							Lgam111	A	55.89	0.12	1.01	0.43	1.73363	0	0.01	24.28	0	0		7.79	4.84	0.9	0	0	0	0	0	2.16449		99.1681	0	99.1681
OL5-106	A	56.1979	0.1865	1.0721	0.4999	1.9994	0.0445	23.3737	8.6774	4.893	0.5331				richterite							OL5-106	A	56.1979	0.1865	1.0721	0.4999	2.22193	0	0.0445	23.3737	0	0		8.6774	4.893	0.5331	0	0	0	0	0	2.1763		99.8763	0	99.8763
Lgam319	A	56.51	0.05	1	0.82	2.87	0.09	23.86	6.4	5.83	0.32				richterite							Lgam319	A	56.51	0.05	1	0.82	3.18943	0	0.09	23.86	0	0		6.4	5.83	0.32	0	0	0	0	0	2.1875		100.257	0	100.257
Lgam057	A	56.03	0.33	1.18	0.55	2.45	0.03	22.71	7.48	5.4	1.61				richterite	potassian-						Lgam057	A	56.03	0.33	1.18	0.55	2.3019	0.378646	0.03	22.71	0	0		7.48	5.4	1.61	0	0	0	0	0	2.16888		100.169	0	100.169
Lgam002	A	55.66	0.21	0.42	0.12	2.26	0.03	23.63	6.98	5.26	3.16				richterite	potassium-						Lgam002	A	55.66	0.21	0.42	0.12	2.51154	0	0.03	23.63	0	0		6.98	5.26	3.16	0	0	0	0	0	2.15369		100.135	0	100.135
Lgam318	A	56.58	0.06	0.99	0.79	2.84	0.09	23.89	6.38	5.81	0.32				richterite							Lgam318	A	56.58	0.06	0.99	0.79	3.15609	0	0.09	23.89	0	0		6.38	5.81	0.32	0	0	0	0	0	2.18839		100.254	0	100.254
Lgam239	A	56.42	0.05	1.11	1	2.76	0.05	23.2	6.39	6.23	0.54				richterite							Lgam239	A	56.42	0.05	1.11	1	3.06719	0	0.05	23.2	0	0		6.39	6.23	0.54	0	0	0	0	0	2.18215		100.239	0	100.239
OL5-51	A	55.6344	0.145	1.0674	0.5403	2.1945	0.0486	22.7787	8.1845	5.1301	0.8499				richterite							OL5-51	A	55.6344	0.145	1.0674	0.5403	2.31208	0.113979	0.0486	22.7787	0	0		8.1845	5.1301	0.8499	0	0	0	0	0	2.15111		98.9561	0	98.9561
Lgam043	A	55.34	0.21	0.78	0.01	2.31	0.02	23.2	7.02	5.58	2				richterite	potassian-						Lgam043	A	55.34	0.21	0.78	0.01	2.5671	0	0.02	23.2	0	0		7.02	5.58	2	0	0	0	0	0	2.13925		98.8664	0	98.8664
Lgam008	A	55.77	0.26	0.37	0	2.66	0.03	23.42	6.6	5.73	2.89				richterite	potassium-						Lgam008	A	55.77	0.26	0.37	0	2.95606	0	0.03	23.42	0	0		6.6	5.73	2.89	0	0	0	0	0	2.15538		100.181	0	100.181
Lgam314	A	56.6	0.03	0.99	0.84	2.89	0.08	23.73	6.44	5.75	0.33				richterite							Lgam314	A	56.6	0.03	0.99	0.84	3.21166	0	0.08	23.73	0	0		6.44	5.75	0.33	0	0	0	0	0	2.18685		100.189	0	100.189
Lgam027	A	55.99	0.19	0.46	0.08	2.17	0.02	23.78	6.97	5.75	2.35				richterite	potassian-						Lgam027	A	55.99	0.19	0.46	0.08	2.41152	0	0.02	23.78	0	0		6.97	5.75	2.35	0	0	0	0	0	2.16286		100.164	0	100.164
Lgam064	A	56.34	0.23	0.99	0.47	2.36	0.05	23.15	7.41	5.38	1.4				richterite							Lgam064	A	56.34	0.23	0.99	0.47	2.62267	0	0.05	23.15	0	0		7.41	5.38	1.4	0	0	0	0	0	2.17578		100.218	0	100.218
Lgam033	A	56.03	0.19	0.66	0.23	2.84	0.03	23.09	6.6	5.84	2.24				richterite	potassian-						Lgam033	A	56.03	0.19	0.66	0.23	3.15609	0	0.03	23.09	0	0		6.6	5.84	2.24	0	0	0	0	0	2.16354		100.23	0	100.23
Lgam129	A	56.51	0.1	1.07	0.53	2.13	0.02	23.5	7.24	5.83	0.83				richterite							Lgam129	A	56.51	0.1	1.07	0.53	2.36707	0	0.02	23.5	0	0		7.24	5.83	0.83	0	0	0	0	0	2.18171		100.179	0	100.179
Lgam041	A	56.07	0.21	0.62	0.22	2.82	0.04	23.09	6.55	6.04	2.1				richterite	potassian-						Lgam041	A	56.07	0.21	0.62	0.22	3.13387	0	0.04	23.09	0	0		6.55	6.04	2.1	0	0	0	0	0	2.16435		100.238	0	100.238
OL5-30	A	56.0748	0.2047	0.8673	0.0381	3.1756	0.0342	22.7067	7.1996	6.2286	1.7915				richterite	potassian-						OL5-30	A	56.0748	0.2047	0.8673	0.0381	1.37254	1.94052	0.0342	22.7067	0	0		7.1996	6.2286	1.7915	0	0	0	0	0	2.16387		100.622	0	100.622
OL5-95	A	56.3788	0.1748	0.5665	0.0983	2.4894	0.0267	23.4501	7.0067	6.173	2.1981				richterite	potassian-						OL5-95	A	56.3788	0.1748	0.5665	0.0983	2.06299	0.633021	0.0267	23.4501	0	0		7.0067	6.173	2.1981	0	0	0	0	0	2.17546		100.944	0	100.944
Lgam009	A	55.9	0.29	0.23	0.24	2.83	0.04	23.56	5.62	6.13	2.88				richterite	potassium-						Lgam009	A	55.9	0.29	0.23	0.24	3.14498	0	0.04	23.56	0	0		5.62	6.13	2.88	0	0	0	0	0	2.15674		100.192	0	100.192
Lgam175	A	56.67	0.18	1.39	0.56	2.32	0.05	22.84	8.3	4.81	0.65				richterite							Lgam175	A	56.67	0.18	1.39	0.56	2.57822	0	0.05	22.84	0	0		8.3	4.81	0.65	0	0	0	0	0	2.18632		100.215	0	100.215
Lgam014	A	55.99	0.2	0.45	0.03	2.52	0.04	23.45	6.85	5.49	2.73				richterite	potassian-						Lgam014	A	55.99	0.2	0.45	0.03	2.80048	0	0.04	23.45	0	0		6.85	5.49	2.73	0	0	0	0	0	2.15978		100.19	0	100.19
Lgam079	A	56.47	0.2	0.7	0.46	1.97	0.04	23.81	7.47	5.48	1.15				richterite							Lgam079	A	56.47	0.2	0.7	0.46	2.18926	0	0.04	23.81	0	0		7.47	5.48	1.15	0	0	0	0	0	2.1781		100.147	0	100.147
Lgam006	A	55.96	0.24	0.36	0.12	2.39	0.04	23.57	6.47	5.71	2.91				richterite	potassium-						Lgam006	A	55.96	0.24	0.36	0.12	2.65601	0	0.04	23.57	0	0		6.47	5.71	2.91	0	0	0	0	0	2.15827		100.194	0	100.194
OL5-125	A	56.4922	0.2277	0.5101	0.0179	2.8466	0.0345	23.3173	6.7879	5.7752	2.7167				richterite	potassian-						OL5-125	A	56.4922	0.2277	0.5101	0.0179	2.86428	0.269185	0.0345	23.3173	0	0		6.7879	5.7752	2.7167	0	0	0	0	0	2.17847		101.191	0	101.191
Lgam104	A	56.52	0.05	1.12	0.73	2.35	0.04	23.15	6.78	6.02	0.98				richterite							Lgam104	A	56.52	0.05	1.12	0.73	2.61156	0	0.04	23.15	0	0		6.78	6.02	0.98	0	0	0	0	0	2.17948		100.181	0	100.181
Lgam026	A	56.09	0.19	0.45	0.12	2.2	0.02	23.65	6.68	5.96	2.4				richterite	potassian-						Lgam026	A	56.09	0.19	0.45	0.12	2.44486	0	0.02	23.65	0	0		6.68	5.96	2.4	0	0	0	0	0	2.16283		100.168	0	100.168
Lgam082	A	54.77	0.26	1.37	0.42	1.44	0.05	22.4	7.68	5.52	1.14				richterite							Lgam082	A	54.77	0.26	1.37	0.42	0.474797	1.01276	0.05	22.4	0	0		7.68	5.52	1.14	0	0	0	0	0	2.11165		97.2092	0	97.2092
Lgam121	A	56.68	0.07	1.15	0.5	2.08	0.05	23.32	9.09	3.95	0.86				silicic edenite	subcalcic sodian						Lgam121	A	56.68	0.07	1.15	0.5	2.3115	0	0.05	23.32	0	0		9.09	3.95	0.86	0	0	0	0	0	2.18528		100.167	0	100.167
OL5-110	A	56.5852	0.1799	0.4257	0.3569	2.3504	0.0483	23.662	6.18	7.0574	1.4468				richterite	potassian-						OL5-110	A	56.5852	0.1799	0.4257	0.3569	2.612	0	0.0483	23.662	0	0		6.18	7.0574	1.4468	0	0	0	0	0	2.18061		100.735	0	100.735
OL5-52	A	56.0949	0.2449	0.6281	0.1219	2.4543	0.031	23.1521	7.0078	5.9877	2.3523				richterite	potassian-						OL5-52	A	56.0949	0.2449	0.6281	0.1219	1.52219	1.08456	0.031	23.1521	0	0		7.0078	5.9877	2.3523	0	0	0	0	0	2.1614		100.389	0	100.389
Lgam065	A	55.12	0.2	0.95	0.1	2.81	0.02	22.31	7.2	5.31	1.4				richterite	potassian-						Lgam065	A	55.12	0.2	0.95	0.1	3.12275	0	0.02	22.31	0	0		7.2	5.31	1.4	0	0	0	0	0	2.12362		97.8564	0	97.8564
Lgam040	A	56.21	0.16	0.48	0.19	2.74	0.03	23.36	6.5	5.96	2.12				richterite	potassian-						Lgam040	A	56.21	0.16	0.48	0.19	3.04496	0	0.03	23.36	0	0		6.5	5.96	2.12	0	0	0	0	0	2.16561		100.221	0	100.221
Lgam004	A	56.03	0.26	0.48	0.06	2.3	0.02	23.35	6.98	5.22	3.07				richterite	potassium-						Lgam004	A	56.03	0.26	0.48	0.06	2.55587	0.000110134	0.02	23.35	0	0		6.98	5.22	3.07	0	0	0	0	0	2.15862		100.185	0	100.185
Lgam313	A	56.83	0.05	0.94	0.67	2.82	0.08	23.69	6.49	5.82	0.33				richterite							Lgam313	A	56.83	0.05	0.94	0.67	3.13387	0	0.08	23.69	0	0		6.49	5.82	0.33	0	0	0	0	0	2.18912		100.223	0	100.223
Lgam317	A	56.86	0.05	0.97	0.77	2.87	0.08	23.61	6.44	5.76	0.32				richterite							Lgam317	A	56.86	0.05	0.97	0.77	3.18943	0	0.08	23.61	0	0		6.44	5.76	0.32	0	0	0	0	0	2.18986		100.239	0	100.239
OL5-133	A	55.93	0.2488	0.5764	0.0572	2.5922	0.038	23.0397	6.9407	6.1801	2.2719				richterite	potassian-						OL5-133	A	55.93	0.2488	0.5764	0.0572	1.27829	1.44193	0.038	23.0397	0	0		6.9407	6.1801	2.2719	0	0	0	0	0	2.15401		100.157	0	100.157
Lgam022	A	56.18	0.21	0.33	0.26	1.83	0.02	23.96	6.52	5.87	2.57				richterite	potassian-						Lgam022	A	56.18	0.21	0.33	0.26	2.03368	0	0.02	23.96	0	0		6.52	5.87	2.57	0	0	0	0	0	2.16299		100.117	0	100.117
OL5-153	A	56.4564	0.1908	0.4572	0.1628	2.7799	0.0361	23.2163	6.7529	6.096	2.4883				richterite	potassian-						OL5-153	A	56.4564	0.1908	0.4572	0.1628	2.18185	0.816567	0.0361	23.2163	0	0		6.7529	6.096	2.4883	0	0	0	0	0	2.17348		101.029	0	101.029
Lgam052	A	56.47	0.18	0.8	0.35	1.96	0.03	23.43	7.49	5.31	1.74				richterite	potassian-						Lgam052	A	56.47	0.18	0.8	0.35	2.17815	0	0.03	23.43	0	0		7.49	5.31	1.74	0	0	0	0	0	2.17369		100.152	0	100.152
Lgam007	A	56.1	0.23	0.44	0.01	2.29	0.02	23.4	6.89	5.49	2.89				richterite	potassium-						Lgam007	A	56.1	0.23	0.44	0.01	2.4658	0.0711534	0.02	23.4	0	0		6.89	5.49	2.89	0	0	0	0	0	2.15924		100.166	0	100.166
Lgam066	A	56.52	0.24	0.78	0.68	2.23	0.03	23.26	6.47	6.14	1.39				richterite							Lgam066	A	56.52	0.24	0.78	0.68	2.4782	0	0.03	23.26	0	0		6.47	6.14	1.39	0	0	0	0	0	2.17525		100.163	0	100.163
OL5-23	A	55.8414	0.2473	0.5585	0.2654	2.5555	0.027	22.8844	6.862	6.2069	2.2507				richterite	potassian-						OL5-23	A	55.8414	0.2473	0.5585	0.2654	1.0719	1.59095	0.027	22.8844	0	0		6.862	6.2069	2.2507	0	0	0	0	0	2.14899		99.9554	0	99.9554
OL5-70	A	56.0631	0.2535	0.5708	0.13	2.4315	0.0299	23.1037	6.9702	5.9923	2.3932				richterite	potassian-						OL5-70	A	56.0631	0.2535	0.5708	0.13	1.33147	1.23338	0.0299	23.1037	0	0		6.9702	5.9923	2.3932	0	0	0	0	0	2.15728		100.229	0	100.229
Lgam037	A	56.28	0.17	0.63	0.02	2.78	0.03	23.03	7.1	5.54	2.18				richterite	potassian-						Lgam037	A	56.28	0.17	0.63	0.02	2.75322	0.30252	0.03	23.03	0	0		7.1	5.54	2.18	0	0	0	0	0	2.16462		100.2	0	100.2
Lgam025	A	55.42	0.25	0.62	0.1	1.74	0.02	23.14	6.99	5.76	2.42				richterite	potassian-						Lgam025	A	55.42	0.25	0.62	0.1	1.15997	0.696202	0.02	23.14	0	0		6.99	5.76	2.42	0	0	0	0	0	2.13089		98.7071	0	98.7071
Lgam031	A	56.29	0.16	0.61	0.13	2.1	0.03	23.35	7.35	5.45	2.29				richterite	potassian-						Lgam031	A	56.29	0.16	0.61	0.13	1.94327	0.351353	0.03	23.35	0	0		7.35	5.45	2.29	0	0	0	0	0	2.16403		100.119	0	100.119
Lgam024	A	56.39	0.17	0.23	0.24	2.06	0.03	24.09	6.18	5.89	2.45				richterite	potassian-						Lgam024	A	56.39	0.17	0.23	0.24	2.28928	0	0.03	24.09	0	0		6.18	5.89	2.45	0	0	0	0	0	2.16597		100.125	0	100.125
Lgam311	A	57.05	0.07	1.04	0.91	2.8	0.08	23.32	6.41	5.7	0.34				richterite							Lgam311	A	57.05	0.07	1.04	0.91	3.11164	0	0.08	23.32	0	0		6.41	5.7	0.34	0	0	0	0	0	2.1912		100.223	0	100.223
Lgam032	A	56.37	0.21	0.61	0.01	2.73	0.03	23	7.06	5.51	2.25				richterite	potassian-						Lgam032	A	56.37	0.21	0.61	0.01	2.55266	0.432996	0.03	23	0	0		7.06	5.51	2.25	0	0	0	0	0	2.16467		100.2	0	100.2
Lgam012	A	56.36	0.16	0.45	0.1	2.08	0.02	23.55	6.97	5.24	2.81				richterite	potassian-						Lgam012	A	56.36	0.16	0.45	0.1	2.3115	0	0.02	23.55	0	0		6.97	5.24	2.81	0	0	0	0	0	2.16343		100.135	0	100.135
OL5-79	A	56.1416	0.2352	0.5588	0.1256	2.7646	0.0381	22.8094	6.8812	6.1006	2.2006				richterite	potassian-						OL5-79	A	56.1416	0.2352	0.5588	0.1256	1.26682	1.62466	0.0381	22.8094	0	0		6.8812	6.1006	2.2006	0	0	0	0	0	2.15483		100.137	0	100.137
Lgam045	A	56.61	0.2	0.37	0.43	2.26	0.03	23.63	5.9	6.4	1.94				richterite	potassian-						Lgam045	A	56.61	0.2	0.37	0.43	2.51154	0	0.03	23.63	0	0		5.9	6.4	1.94	0	0	0	0	0	2.17108		100.193	0	100.193
OL5-65	A	56.6091	0.2499	0.2795	0.1186	1.6505	0.0077	23.818	6.5249	6.0491	2.9071				richterite	potassium-						OL5-65	A	56.6091	0.2499	0.2795	0.1186	1.79986	0.0309025	0.0077	23.818	0	0		6.5249	6.0491	2.9071	0	0	0	0	0	2.17074		100.565	0	100.565
Lgam112	A	55.49	0.17	1.1	0.42	1.63	0.03	22.53	8.29	4.55	0.9				richterite							Lgam112	A	55.49	0.17	1.1	0.42	1.70255	0.0979624	0.03	22.53	0	0		8.29	4.55	0.9	0	0	0	0	0	2.1271		97.4076	0	97.4076
Lgam013	A	56.37	0.24	0.22	0.05	3.64	0.04	22.78	5.35	6.33	2.73				richterite	potassian-						Lgam013	A	56.37	0.24	0.22	0.05	4.04513	0	0.04	22.78	0	0		5.35	6.33	2.73	0	0	0	0	0	2.16044		100.316	0	100.316
Lgam017	A	56.47	0.2	0.23	0.25	2.5	0.03	23.56	5.59	6.29	2.65				richterite	potassian-						Lgam017	A	56.47	0.2	0.23	0.25	2.77825	0	0.03	23.56	0	0		5.59	6.29	2.65	0	0	0	0	0	2.16417		100.212	0	100.212
Lgam001	A	56.4	0.31	0.35	0.15	1.99	0.02	23.35	6.57	5.35	3.29				richterite	potassium-						Lgam001	A	56.4	0.31	0.35	0.15	2.17672	0.0312806	0.02	23.35	0	0		6.57	5.35	3.29	0	0	0	0	0	2.16015		100.158	0	100.158
OL5-134	A	56.085	0.2594	0.5884	0.0713	2.6222	0.0323	22.7263	6.9474	6.1453	2.2824				richterite	potassian-						OL5-134	A	56.085	0.2594	0.5884	0.0713	0.335495	2.32031	0.0323	22.7263	0	0		6.9474	6.1453	2.2824	0	0	0	0	0	2.14804		99.9416	0	99.9416
Lgam098	A	54.63	0.22	1.25	0.5	1.53	0.02	21.95	7.74	5.27	1.06				richterite							Lgam098	A	54.63	0.22	1.25	0.5	0	1.53	0.02	21.95	0	0		7.74	5.27	1.06	0	0	0	0	0	2.09227		96.2623	0	96.2623
OL5-82	A	56.562	0.1571	0.2292	0.2357	2.043	0.0114	23.5059	5.842	7.1937	1.8983				richterite	potassian-						OL5-82	A	56.562	0.1571	0.2292	0.2357	2.27039	0	0.0114	23.5059	0	0		5.842	7.1937	1.8983	0	0	0	0	0	2.16545		100.071	0	100.071
Lgam139	A	53.88	0.16	1.75	0.51	1.45	0.01	20.84	8.34	4.94	0.8				richterite							Lgam139	A	53.88	0.16	1.75	0.51	0	1.45	0.01	20.84	0	0		8.34	4.94	0.8	0	0	0	0	0	2.06271		94.7427	0	94.7427
Lgam029	A	55.36	0.25	0.64	0.01	1.57	0	22.78	6.9	6.28	2.32				richterite	potassian-						Lgam029	A	55.36	0.25	0.64	0.01	0	1.57	0	22.78	0	0		6.9	6.28	2.32	0	0	0	0	0	2.11812		98.2281	0	98.2281
Lgam010	A	56.57	0.23	0.22	0.27	2.42	0.02	23.46	5.7	6.05	2.83				richterite	potassium-						Lgam010	A	56.57	0.23	0.22	0.27	2.68935	0	0.02	23.46	0	0		5.7	6.05	2.83	0	0	0	0	0	2.16408		100.203	0	100.203
Lgam018	A	56.56	0.15	0.43	0.09	2.06	0.03	23.35	7	5.47	2.61				richterite	potassian-						Lgam018	A	56.56	0.15	0.43	0.09	1.94209	0.312417	0.03	23.35	0	0		7	5.47	2.61	0	0	0	0	0	2.16369		100.108	0	100.108
Lgam020	A	56.58	0.21	0.44	0.19	1.87	0.02	23.36	6.73	5.77	2.6				richterite	potassian-						Lgam020	A	56.58	0.21	0.44	0.19	1.66829	0.368795	0.02	23.36	0	0		6.73	5.77	2.6	0	0	0	0	0	2.16377		100.101	0	100.101
Lgam003	A	56.46	0.26	0.44	0.15	2.11	0.03	23.16	6.86	5.19	3.09				richterite	potassium-						Lgam003	A	56.46	0.26	0.44	0.15	1.80783	0.483231	0.03	23.16	0	0		6.86	5.19	3.09	0	0	0	0	0	2.15909		100.09	0	100.09
Lgam036	A	56.63	0.21	0.5	0.26	2.76	0.05	22.76	6.56	5.83	2.18				richterite	potassian-						Lgam036	A	56.63	0.21	0.5	0.26	2.51427	0.497539	0.05	22.76	0	0		6.56	5.83	2.18	0	0	0	0	0	2.16495		100.157	0	100.157
OL5-64	A	56.245	0.1655	0.3218	0.109	1.9505	0.0211	23.3005	6.4183	6.3599	2.5345				richterite	potassian-						OL5-64	A	56.245	0.1655	0.3218	0.109	1.18569	0.883562	0.0211	23.3005	0	0		6.4183	6.3599	2.5345	0	0	0	0	0	2.15011		99.695	0	99.695
Lgam011	A	56.57	0.25	0.54	0.02	2.27	0.03	23.09	7.27	4.9	2.82				richterite	potassian-						Lgam011	A	56.57	0.25	0.54	0.02	1.85341	0.602213	0.03	23.09	0	0		7.27	4.9	2.82	0	0	0	0	0	2.16248		100.108	0	100.108
Lgam016	A	56.65	0.25	0.21	0.26	2.5	0.03	23.38	5.68	6.12	2.66				richterite	potassian-						Lgam016	A	56.65	0.25	0.21	0.26	2.77825	0	0.03	23.38	0	0		5.68	6.12	2.66	0	0	0	0	0	2.16523		100.183	0	100.183
Lgam071	A	54.88	0.22	1.43	0.68	1.78	0.01	21.34	8.09	4.83	1.26				richterite							Lgam071	A	54.88	0.22	1.43	0.68	0	1.78	0.01	21.34	0	0		8.09	4.83	1.26	0	0	0	0	0	2.09748		96.6175	0	96.6175
Lgam053	A	56.87	0.19	0.75	0.29	2.05	0.02	23.04	7.47	5.35	1.71				richterite	potassian-						Lgam053	A	56.87	0.19	0.75	0.29	1.6339	0.579737	0.02	23.04	0	0		7.47	5.35	1.71	0	0	0	0	0	2.17283		100.076	0	100.076
Lgam039	A	56.91	0.14	0.21	0.25	2.09	0.03	23.78	5.99	6.25	2.13				richterite	potassian-						Lgam039	A	56.91	0.14	0.21	0.25	2.32262	0	0.03	23.78	0	0		5.99	6.25	2.13	0	0	0	0	0	2.17233		100.185	0	100.185
OL5-80	A	56.9589	0.1594	0.2393	0.3867	2.0185	0.0209	23.399	5.779	7.115	1.9166				richterite	potassian-						OL5-80	A	56.9589	0.1594	0.2393	0.3867	2.17667	0.0598329	0.0209	23.399	0	0		5.779	7.115	1.9166	0	0	0	0	0	2.17399		100.385	0	100.385
Lgam015	A	57.11	0.22	0.35	0.08	1.42	0	23.94	6.37	6.05	2.72				richterite	potassian-						Lgam015	A	57.11	0.22	0.35	0.08	1.57805	0	0	23.94	0	0		6.37	6.05	2.72	0	0	0	0	0	2.17922		100.597	0	100.597
Lgam028	A	56.48	0.23	0.51	0.02	1.74	0.01	23.45	6.82	5.09	2.33				richterite	potassian-						Lgam028	A	56.48	0.23	0.51	0.02	1.93366	0	0.01	23.45	0	0		6.82	5.09	2.33	0	0	0	0	0	2.15248		99.0261	0	99.0261
Lgam093	A	53.92	0.18	1.45	0.59	1.68	0.01	20.63	8.13	4.75	1.09				richterite							Lgam093	A	53.92	0.18	1.45	0.59	0	1.68	0.01	20.63	0	0		8.13	4.75	1.09	0	0	0	0	0	2.05397		94.484	0	94.484
Lgam060	A	53.65	0.2	1.35	0.19	1.89	0	20.62	8.24	4.3	1.56				richterite	potassian-						Lgam060	A	53.65	0.2	1.35	0.19	0	1.89	0	20.62	0	0		8.24	4.3	1.56	0	0	0	0	0	2.04058		94.0406	0	94.0406
Lgam069	A	54.69	0.22	1.26	0.3	2.41	0.04	21.05	7.62	4.79	1.31				richterite							Lgam069	A	54.69	0.22	1.26	0.3	0	2.41	0.04	21.05	0	0		7.62	4.79	1.31	0	0	0	0	0	2.07764		95.7676	0	95.7676
Lgam005	A	56.19	0.2	0.3	0.12	1.22	0	23.53	6.39	5.12	3.02				richterite	potassium-						Lgam005	A	56.19	0.2	0.3	0.12	1.35579	0	0	23.53	0	0		6.39	5.12	3.02	0	0	0	0	0	2.13409		98.3599	0	98.3599
Lgam023	A	54.87	0.28	0.59	0.13	2.03	0	21.24	6.83	5.68	2.48				richterite	potassian-						Lgam023	A	54.87	0.28	0.59	0.13	0	2.03	0	21.24	0	0		6.83	5.68	2.48	0	0	0	0	0	2.07449		96.2045	0	96.2045
Lgam044	A	54.33	0.23	0.83	0.05	2.65	0	20.16	7.09	5.53	1.97				richterite	potassian-						Lgam044	A	54.33	0.23	0.83	0.05	0	2.65	0	20.16	0	0		7.09	5.53	1.97	0	0	0	0	0	2.04699		94.887	0	94.887
Lgam271	A	58.68	0.06	1.24	0.95	3.01	0.08	21.28	6.71	5.19	0.44				winchite							Lgam271	A	58.68	0.06	1.24	0.95	2.48096	0.777518	0.08	21.28	0	0		6.71	5.19	0.44	0	0	0	0	0	2.19685		100.085	0	100.085
Lgam042	A	57.02	0.16	0.21	0.2	1.29	0.01	22.01	5.68	5.82	2				richterite	potassian-						Lgam042	A	57.02	0.16	0.21	0.2	0	1.29	0.01	22.01	0	0		5.68	5.82	2	0	0	0	0	0	2.10924		96.5092	0	96.5092
[truncated: 33 more columns]

## Sheet: amfamg
PROBE-AMPH an amphibole structural formula calculator and classifier (with barometers)
For microprobe analyses: i.e. H2O, Fe2O3 and Li2O not analysed
Based on 23 oxygens with Fe2+/Fe3+ estimation assuming Џ13 cations - except for Fe-Mg-Mn amphiboles where Џ15 is applied.
The method cannot distinguish between orthorhombic and monoclinic Fe-Mg-Mn amphiboles.
See Leake, (1978) Miner. Mag.; Rock and Leake, (1984) Miner. Mag. and Mogessie et al., (1990) Computers and Geosciences for classification info.
See Hammarstrom and Zen (1986), Hollister et al. (1987), Johnson and Rutherford (1989) and Schmidt (1992) for geobarometry info.
Input data here	Magnesio Cummingtonite (m) Magnesio Anthophyllite (orh)	Cummingtonite (m) Anthophyllite (orh)	Sodian-Magnesio Cummingtonite (m) Magnesio Gedrite (orh)	Dannemorite	Tirodite	Lgam271	OL5-97	Lgam015	Lgam311	Lgam042	OL5-80	Lgam039	Lgam053	Lgam317	Lgam313	OL5-104	Lgam121	Lgam175	Lgam016	Lgam036	Lgam045	OL5-65	Lgam314	OL5-110	Lgam020	Lgam318	Lgam010	Lgam011	OL5-82	Lgam018	Lgam066	Lgam104	Lgam129	Lgam319	OL5-125	Lgam028	Lgam017	Lgam052	Lgam079	Lgam003	OL5-153	Lgam239	Lgam307	Lgam312	Lgam001	Lgam302	Lgam024	Lgam320	OL5-95
Sample number	M1	M2	M3	M9	M10	A	A	A	A	A	A	A	A	A	A	A	A	A	A	A	A	A	A	A	A	A	A	A	A	A	A	A	A	A	A	A	A	A	A	A	A	A	A	A	A	A	A	A	A
SiO2	60	52.5	49.01	50.6	55.27	58.68	57.7881	57.11	57.05	57.02	56.9589	56.91	56.87	56.86	56.83	56.7775	56.68	56.67	56.65	56.63	56.61	56.6091	56.6	56.5852	56.58	56.58	56.57	56.57	56.562	56.56	56.52	56.52	56.51	56.51	56.4922	56.48	56.47	56.47	56.47	56.46	56.4564	56.42	56.42	56.41	56.4	56.4	56.39	56.39	56.3788
TiO2	0	0	0.2	0	0	0.06	0.2495	0.22	0.07	0.16	0.1594	0.14	0.19	0.05	0.05	0.3379	0.07	0.18	0.25	0.21	0.2	0.2499	0.03	0.1799	0.21	0.06	0.23	0.25	0.1571	0.15	0.24	0.05	0.1	0.05	0.2277	0.23	0.2	0.18	0.2	0.26	0.1908	0.05	0.06	0.06	0.31	0.04	0.17	0.05	0.1748
Al2O3	0.4	4.4	14.91	0.04	0.34	1.24	1.9177	0.35	1.04	0.21	0.2393	0.21	0.75	0.97	0.94	3.0204	1.15	1.39	0.21	0.5	0.37	0.2795	0.99	0.4257	0.44	0.99	0.22	0.54	0.2292	0.43	0.78	1.12	1.07	1	0.5101	0.51	0.23	0.8	0.7	0.44	0.4572	1.11	1.15	0.98	0.35	1.05	0.23	0.95	0.5665
FeO	0.4	20.4	0.55	36.1	4.52	3.01	2.5941	1.42	2.8	1.29	2.0185	2.09	2.05	2.87	2.82	2.8607	2.08	2.32	2.5	2.76	2.26	1.6505	2.89	2.3504	1.87	2.84	2.42	2.27	2.043	2.06	2.23	2.35	2.13	2.87	2.8466	1.74	2.5	1.96	1.97	2.11	2.7799	2.76	2.82	2.85	1.99	2.82	2.06	2.91	2.4894
MnO	0.6	0.3	0	5.8	16.62	0.08	0.0461	0	0.08	0.01	0.0209	0.03	0.02	0.08	0.08	0.0457	0.05	0.05	0.03	0.05	0.03	0.0077	0.08	0.0483	0.02	0.09	0.02	0.03	0.0114	0.03	0.03	0.04	0.02	0.09	0.0345	0.01	0.03	0.03	0.04	0.03	0.0361	0.05	0.08	0.07	0.02	0.08	0.03	0.07	0.0267
MgO	33.4	18	28.62	6.4	19.18	21.28	24.0053	23.94	23.32	22.01	23.399	23.78	23.04	23.61	23.69	22.8275	23.32	22.84	23.38	22.76	23.63	23.818	23.73	23.662	23.36	23.89	23.46	23.09	23.5059	23.35	23.26	23.15	23.5	23.86	23.3173	23.45	23.56	23.43	23.81	23.16	23.2163	23.2	23.68	23.88	23.35	23.81	24.09	23.9	23.4501
CaO	0.2	0.5	0.23	0.4	1.19	6.71	8.7276	6.37	6.41	5.68	5.779	5.99	7.47	6.44	6.49	9.8916	9.09	8.3	5.68	6.56	5.9	6.5249	6.44	6.18	6.73	6.38	5.7	7.27	5.842	7	6.47	6.78	7.24	6.4	6.7879	6.82	5.59	7.49	7.47	6.86	6.7529	6.39	6.47	6.45	6.57	6.39	6.18	6.5	7.0067
Na2O	0.2	0.1	1.46	0.05	0.26	5.19	5.6878	6.05	5.7	5.82	7.115	6.25	5.35	5.76	5.82	4.6383	3.95	4.81	6.12	5.83	6.4	6.0491	5.75	7.0574	5.77	5.81	6.05	4.9	7.1937	5.47	6.14	6.02	5.83	5.83	5.7752	5.09	6.29	5.31	5.48	5.19	6.096	6.23	5.74	5.85	5.35	5.86	5.89	5.81	6.173
K2O	0	0	0	0	0	0.44	0.5553	2.72	0.34	2	1.9166	2.13	1.71	0.32	0.33	0.4504	0.86	0.65	2.66	2.18	1.94	2.9071	0.33	1.4468	2.6	0.32	2.83	2.82	1.8983	2.61	1.39	0.98	0.83	0.32	2.7167	2.33	2.65	1.74	1.15	3.09	2.4883	0.54	0.35	0.34	3.29	0.37	2.45	0.32	2.1981
BaO
SrO
PbO
ZnO
F
Cl
Cr2O3						0.95	0.7976	0.08	0.91	0.2	0.3867	0.25	0.29	0.77	0.67	0.9594	0.5	0.56	0.26	0.26	0.43	0.1186	0.84	0.3569	0.19	0.79	0.27	0.02	0.2357	0.09	0.68	0.73	0.53	0.82	0.0179	0.02	0.25	0.35	0.46	0.15	0.1628	1	0.96	0.82	0.15	0.94	0.24	0.8	0.0983
NiO
Reformatted oxide %	Magnesio Cummingtonite (m) Magnesio Anthophyllite (orh)	Cummingtonite (m) Anthophyllite (orh)	Sodian-Magnesio Cummingtonite (m) Magnesio Gedrite (orh)	Dannemorite	Tirodite	Lgam271	OL5-97	Lgam015	Lgam311	Lgam042	OL5-80	Lgam039	Lgam053	Lgam317	Lgam313	OL5-104	Lgam121	Lgam175	Lgam016	Lgam036	Lgam045	OL5-65	Lgam314	OL5-110	Lgam020	Lgam318	Lgam010	Lgam011	OL5-82	Lgam018	Lgam066	Lgam104	Lgam129	Lgam319	OL5-125	Lgam028	Lgam017	Lgam052	Lgam079	Lgam003	OL5-153	Lgam239	Lgam307	Lgam312	Lgam001	Lgam302	Lgam024	Lgam320	OL5-95
	M1	M2	M3	M9	M10	A	A	A	A	A	A	A	A	A	A	A	A	A	A	A	A	A	A	A	A	A	A	A	A	A	A	A	A	A	A	A	A	A	A	A	A	A	A	A	A	A	A	A	A
SiO2	60	52.5	49.01	50.6	55.27	58.68	57.7881	57.11	57.05	57.02	56.9589	56.91	56.87	56.86	56.83	56.7775	56.68	56.67	56.65	56.63	56.61	56.6091	56.6	56.5852	56.58	56.58	56.57	56.57	56.562	56.56	56.52	56.52	56.51	56.51	56.4922	56.48	56.47	56.47	56.47	56.46	56.4564	56.42	56.42	56.41	56.4	56.4	56.39	56.39	56.3788
TiO2	0	0	0.2	0	0	0.06	0.2495	0.22	0.07	0.16	0.1594	0.14	0.19	0.05	0.05	0.3379	0.07	0.18	0.25	0.21	0.2	0.2499	0.03	0.1799	0.21	0.06	0.23	0.25	0.1571	0.15	0.24	0.05	0.1	0.05	0.2277	0.23	0.2	0.18	0.2	0.26	0.1908	0.05	0.06	0.06	0.31	0.04	0.17	0.05	0.1748
Al2O3	0.4	4.4	14.91	0.04	0.34	1.24	1.9177	0.35	1.04	0.21	0.2393	0.21	0.75	0.97	0.94	3.0204	1.15	1.39	0.21	0.5	0.37	0.2795	0.99	0.4257	0.44	0.99	0.22	0.54	0.2292	0.43	0.78	1.12	1.07	1	0.5101	0.51	0.23	0.8	0.7	0.44	0.4572	1.11	1.15	0.98	0.35	1.05	0.23	0.95	0.5665
Cr2O3	0	0	0	0	0	0.95	0.7976	0.08	0.91	0.2	0.3867	0.25	0.29	0.77	0.67	0.9594	0.5	0.56	0.26	0.26	0.43	0.1186	0.84	0.3569	0.19	0.79	0.27	0.02	0.2357	0.09	0.68	0.73	0.53	0.82	0.0179	0.02	0.25	0.35	0.46	0.15	0.1628	1	0.96	0.82	0.15	0.94	0.24	0.8	0.0983
Fe2O3	0	0	0	1.00516	0	2.48096	2.88282	1.57805	3.11164	0	2.17667	2.32262	1.6339	3.18943	3.13387	1.77223	2.3115	2.57822	2.77825	2.51427	2.51154	1.79986	3.21166	2.612	1.66829	3.15609	2.68935	1.85341	2.27039	1.94209	2.4782	2.61156	2.36707	3.18943	2.86428	1.93366	2.77825	2.17815	2.18926	1.80783	2.18185	3.06719	3.13387	3.16721	2.17672	3.13387	2.28928	3.23388	2.06299
FeO	0.4	20.4	0.55	35.1955	4.52	0.777518	0	0	0	1.29	0.0598329	0	0.579737	0	0	1.26596	0	0	0	0.497539	0	0.0309025	0	0	0.368795	0	0	0.602213	0	0.312417	0	0	0	0	0.269185	0	0	0	0	0.483231	0.816567	0	0	0	0.0312806	0	0	0	0.633021
MnO	0.6	0.3	0	5.8	16.62	0.08	0.0461	0	0.08	0.01	0.0209	0.03	0.02	0.08	0.08	0.0457	0.05	0.05	0.03	0.05	0.03	0.0077	0.08	0.0483	0.02	0.09	0.02	0.03	0.0114	0.03	0.03	0.04	0.02	0.09	0.0345	0.01	0.03	0.03	0.04	0.03	0.0361	0.05	0.08	0.07	0.02	0.08	0.03	0.07	0.0267
MgO	33.4	18	28.62	6.4	19.18	21.28	24.0053	23.94	23.32	22.01	23.399	23.78	23.04	23.61	23.69	22.8275	23.32	22.84	23.38	22.76	23.63	23.818	23.73	23.662	23.36	23.89	23.46	23.09	23.5059	23.35	23.26	23.15	23.5	23.86	23.3173	23.45	23.56	23.43	23.81	23.16	23.2163	23.2	23.68	23.88	23.35	23.81	24.09	23.9	23.4501
NiO	0	0	0	0	0	0	0	0	0	0	0	0	0	0	0	0	0	0	0	0	0	0	0	0	0	0	0	0	0	0	0	0	0	0	0	0	0	0	0	0	0	0	0	0	0	0	0	0	0
ZnO	0	0	0	0	0	0	0	0	0	0	0	0	0	0	0	0	0	0	0	0	0	0	0	0	0	0	0	0	0	0	0	0	0	0	0	0	0	0	0	0	0	0	0	0	0	0	0	0	0
Li2O* (not implemented)
CaO	0.2	0.5	0.23	0.4	1.19	6.71	8.7276	6.37	6.41	5.68	5.779	5.99	7.47	6.44	6.49	9.8916	9.09	8.3	5.68	6.56	5.9	6.5249	6.44	6.18	6.73	6.38	5.7	7.27	5.842	7	6.47	6.78	7.24	6.4	6.7879	6.82	5.59	7.49	7.47	6.86	6.7529	6.39	6.47	6.45	6.57	6.39	6.18	6.5	7.0067
Na2O	0.2	0.1	1.46	0.05	0.26	5.19	5.6878	6.05	5.7	5.82	7.115	6.25	5.35	5.76	5.82	4.6383	3.95	4.81	6.12	5.83	6.4	6.0491	5.75	7.0574	5.77	5.81	6.05	4.9	7.1937	5.47	6.14	6.02	5.83	5.83	5.7752	5.09	6.29	5.31	5.48	5.19	6.096	6.23	5.74	5.85	5.35	5.86	5.89	5.81	6.173
K2O	0	0	0	0	0	0.44	0.5553	2.72	0.34	2	1.9166	2.13	1.71	0.32	0.33	0.4504	0.86	0.65	2.66	2.18	1.94	2.9071	0.33	1.4468	2.6	0.32	2.83	2.82	1.8983	2.61	1.39	0.98	0.83	0.32	2.7167	2.33	2.65	1.74	1.15	3.09	2.4883	0.54	0.35	0.34	3.29	0.37	2.45	0.32	2.1981
BaO	0	0	0	0	0	0	0	0	0	0	0	0	0	0	0	0	0	0	0	0	0	0	0	0	0	0	0	0	0	0	0	0	0	0	0	0	0	0	0	0	0	0	0	0	0	0	0	0	0
SrO	0	0	0	0	0	0	0	0	0	0	0	0	0	0	0	0	0	0	0	0	0	0	0	0	0	0	0	0	0	0	0	0	0	0	0	0	0	0	0	0	0	0	0	0	0	0	0	0	0
PbO	0	0	0	0	0	0	0	0	0	0	0	0	0	0	0	0	0	0	0	0	0	0	0	0	0	0	0	0	0	0	0	0	0	0	0	0	0	0	0	0	0	0	0	0	0	0	0	0	0
F	0	0	0	0	0	0	0	0	0	0	0	0	0	0	0	0	0	0	0	0	0	0	0	0	0	0	0	0	0	0	0	0	0	0	0	0	0	0	0	0	0	0	0	0	0	0	0	0	0
Cl	0	0	0	0	0	0	0	0	0	0	0	0	0	0	0	0	0	0	0	0	0	0	0	0	0	0	0	0	0	0	0	0	0	0	0	0	0	0	0	0	0	0	0	0	0	0	0	0	0
H2O*	2.23906	2.05406	2.2093	1.9134	2.07438	2.19685	2.27604	2.17922	2.1912	2.10924	2.17399	2.17233	2.17283	2.18986	2.18912	2.25602	2.18528	2.18632	2.16523	2.16495	2.17108	2.17074	2.18685	2.18061	2.16377	2.18839	2.16408	2.16248	2.16545	2.16369	2.17525	2.17948	2.18171	2.1875	2.17847	2.15248	2.16417	2.17369	2.1781	2.15909	2.17348	2.18215	2.18663	2.18558	2.16015	2.1862	2.16597	2.18526	2.17546
	97.4391	98.2541	97.1893	101.404	99.4544	100.085	104.934	100.597	100.223	96.5092	100.385	100.185	100.076	100.239	100.223	104.243	100.167	100.215	100.183	100.157	100.193	100.565	100.189	100.735	100.101	100.254	100.203	100.108	100.071	100.108	100.163	100.181	100.179	100.257	101.191	99.0261	100.212	100.152	100.147	100.09	101.029	100.239	100.23	100.213	100.158	100.26	100.125	100.209	100.944
O=F,Cl	0	0	0	0	0	0	0	0	0	0	0	0	0	0	0	0	0	0	0	0	0	0	0	0	0	0	0	0	0	0	0	0	0	0	0	0	0	0	0	0	0	0	0	0	0	0	0	0	0
Total	97.4391	98.2541	97.1893	101.404	99.4544	100.085	104.934	100.597	100.223	96.5092	100.385	100.185	100.076	100.239	100.223	104.243	100.167	100.215	100.183	100.157	100.193	100.565	100.189	100.735	100.101	100.254	100.203	100.108	100.071	100.108	100.163	100.181	100.179	100.257	101.191	99.0261	100.212	100.152	100.147	100.09	101.029	100.239	100.23	100.213	100.158	100.26	100.125	100.209	100.944
No. of oxygens	23	23	23	23	23	23	23	23	23	23	23	23	23	23	23	23	23	23	23	23	23	23	23	23	23	23	23	23	23	23	23	23	23	23	23	23	23	23	23	23	23	23	23	23	23	23	23	23	23
Structural formulae
Si	8.03496	7.66378	6.65161	7.92944	7.98909	8.00915	7.61301	7.85793	7.80677	8.10585	7.85601	7.85524	7.84791	7.78551	7.78404	7.54623	7.77714	7.77207	7.845	7.84323	7.81834	7.81943	7.76058	7.78075	7.84059	7.7524	7.83808	7.84389	7.83203	7.83812	7.79093	7.77584	7.7665	7.74595	7.77559	7.86779	7.82391	7.78965	7.77387	7.84093	7.78851	7.75258	7.73668	7.73902	7.82875	7.73548	7.80634	7.73741	7.77072
Al iv	0	0.336224	1.34839	0.00738775	0.010907	0	0.297755	0.0567576	0.16773	0	0.0388994	0.0341626	0.121981	0.156535	0.151745	0.453773	0.185972	0.224677	0.0342746	0.0816167	0.0602259	0.0455021	0.159983	0.0689894	0.0718619	0.159871	0.0359258	0.0882469	0.0374046	0.0702314	0.126719	0.181603	0.173318	0.161551	0.0827486	0.0837314	0.0375573	0.130062	0.113574	0.0720178	0.0743374	0.179761	0.185857	0.158459	0.0572588	0.16973	0.0375261	0.153631	0.092025
Al vi	0.0631324	0.420777	1.03656	0	0.0470155	0.19947	0	0	0	0.0351845	0	0	0	0	0	0.019355	0	0	0	0	0	0	0	0	0	0	0	0	0	0	0	0	0	0	0	0	0	0	0	0	0	0	0	0	0	0	0	0	0
Ti	0	0	0.0204174	0	0	0.00615995	0.0247239	0.0227692	0.00720516	0.0171089	0.0165371	0.0145355	0.0197221	0.00514967	0.00515142	0.0337809	0.00722466	0.0185689	0.0260413	0.0218775	0.0207769	0.0259648	0.00309406	0.0186071	0.0218894	0.00618378	0.0239707	0.0260744	0.0163627	0.0156359	0.0248844	0.00517422	0.0103378	0.00515524	0.0235742	0.0240999	0.0208433	0.0186768	0.02071	0.02716	0.0197993	0.00516788	0.00618874	0.00619171	0.0323672	0.00412665	0.0177021	0.00516052	0.0181224
Cr	0	0	0	0	0	0.102517	0.0830765	0.00870284	0.0984539	0.022479	0.0421687	0.0272826	0.0316406	0.0833578	0.0725567	0.100816	0.054242	0.0607221	0.028467	0.0284706	0.0469532	0.0129524	0.091061	0.0388008	0.0208168	0.0855807	0.0295776	0.00219256	0.0258039	0.00986098	0.0741091	0.0794042	0.0575906	0.0888667	0.00194793	0.00220274	0.0273855	0.0381719	0.0500672	0.01647	0.0177571	0.10864	0.10408	0.0889445	0.0164619	0.101932	0.0262683	0.0867879	0.0107121
Fe3+	0	0	0	0.118537	0	0.254824	0.285799	0.163396	0.320428	0	0.225921	0.241253	0.169677	0.328638	0.323022	0.177255	0.238676	0.266089	0.289527	0.262051	0.261027	0.187091	0.331384	0.270281	0.173973	0.325423	0.280411	0.193393	0.236578	0.202533	0.257068	0.270377	0.244814	0.328994	0.296678	0.202704	0.289669	0.226106	0.226799	0.188933	0.226512	0.31716	0.32339	0.326987	0.227375	0.323454	0.238489	0.33392	0.213978
Fe2+	0.0447969	2.4904	0.0624253	4.61249	0.54639	0.0887488	0	0	0	0.153362	0.00690139	0	0.0669049	0	0	0.140712	0	0	0	0.0576278	0	0.00356976	0	0	0.0427392	0	0	0.0698315	0	0.036207	0	0	0	0	0.030985	0	0	0	0	0.0561225	0.0942082	0	0	0	0.00363115	0	0	0	0.0729658
Mn	0.0680565	0.0370929	0	0.769849	2.03481	0.00924851	0.00514404	0	0.00927239	0.00120409	0.00244159	0.00350734	0.00233769	0.00927803	0.00928118	0.00514465	0.00581093	0.00580817	0.00351884	0.00586549	0.00350936	0.000900877	0.00929081	0.00562537	0.00234748	0.0104448	0.00234714	0.00352332	0.00133703	0.00352135	0.00350263	0.00466113	0.00232818	0.0104491	0.00402207	0.0011799	0.00352057	0.00350515	0.00466407	0.00352885	0.00421827	0.00581928	0.00929174	0.00813417	0.00235142	0.00929359	0.00351765	0.00813537	0.00311704
Mg	6.66787	3.9171	5.79055	1.49514	4.133	4.32988	4.71448	4.91053	4.75722	4.66445	4.81112	4.89318	4.73982	4.81931	4.83728	4.52294	4.7701	4.66969	4.82665	4.69926	4.86512	4.90459	4.85047	4.85041	4.82578	4.87976	4.84574	4.77285	4.85216	4.82389	4.77975	4.74793	4.81478	4.87561	4.78445	4.86978	4.8662	4.81816	4.88638	4.79484	4.77466	4.75236	4.84074	4.88397	4.8318	4.86828	4.97154	4.88878	4.81836
Ni	0	0	0	0	0	0	0	0	0	0	0	0	0	0	0	0	0	0	0	0	0	0	0	0	0	0	0	0	0	0	0	0	0	0	0	0	0	0	0	0	0	0	0	0	0	0	0	0	0
Zn	0	0	0	0	0	0	0	0	0	0	0	0	0	0	0	0	0	0	0	0	0	0	0	0	0	0	0	0	0	0	0	0	0	0	0	0	0	0	0	0	0	0	0	0	0	0	0	0	0
Li* (not implemented)	0	0	0	0	0	0	0	0	0	0	0	0	0	0	0	0	0	0	0	0	0	0	0	0	0	0	0	0	0	0	0	0	0	0	0	0	0	0	0	0	0	0	0	0	0	0	0	0	0
Ca	0.0286959	0.0782008	0.0334447	0.0671599	0.184295	0.981242	1.23189	0.939059	0.939792	0.865122	0.853986	0.88584	1.10446	0.944764	0.952423	1.40857	1.33632	1.21961	0.842751	0.973442	0.873033	0.965651	0.946066	0.910468	0.999214	0.936595	0.846167	1.08003	0.8667	1.03934	0.955541	0.999384	1.0661	0.939912	1.00101	1.01789	0.829804	1.10698	1.10179	1.02072	0.998134	0.940744	0.950568	0.948085	0.977095	0.939002	0.916624	0.955575	1.03471
Na	0.0519302	0.0283036	0.384196	0.0151922	0.0728684	1.37348	1.45285	1.61402	1.51234	1.60418	1.90271	1.67266	1.43147	1.52919	1.54564	1.19528	1.05086	1.27905	1.64324	1.56558	1.71379	1.62008	1.52863	1.88157	1.55031	1.5435	1.62531	1.31734	1.93134	1.46976	1.64102	1.60583	1.55355	1.54944	1.54124	1.37478	1.68972	1.42021	1.46271	1.3975	1.63059	1.65981	1.52613	1.55612	1.43988	1.55834	1.58095	1.54571	1.64968
K	0	0	0	0	0	0.0766139	0.0933263	0.477445	0.0593545	0.36271	0.337233	0.375067	0.301041	0.055897	0.0576633	0.0763678	0.150538	0.113725	0.46993	0.38518	0.341807	0.51228	0.0577232	0.253796	0.45964	0.0559348	0.500229	0.49883	0.33533	0.461425	0.244433	0.172001	0.145525	0.0559575	0.47703	0.414069	0.468393	0.306202	0.201965	0.547449	0.437928	0.0946598	0.0612277	0.0595069	0.582597	0.0647393	0.432683	0.0560147	0.386502
Ba	0	0	0	0	0	0	0	0	0	0	0	0	0	0	0	0	0	0	0	0	0	0	0	0	0	0	0	0	0	0	0	0	0	0	0	0	0	0	0	0	0	0	0	0	0	0	0	0	0
Sr	0	0	0	0	0	0	0	0	0	0	0	0	0	0	0	0	0	0	0	0	0	0	0	0	0	0	0	0	0	0	0	0	0	0	0	0	0	0	0	0	0	0	0	0	0	0	0	0	0
Pb	0	0	0	0	0	0	0	0	0	0	0	0	0	0	0	0	0	0	0	0	0	0	0	0	0	0	0	0	0	0	0	0	0	0	0	0	0	0	0	0	0	0	0	0	0	0	0	0	0
F	0	0	0	0	0	0	0	0	0	0	0	0	0	0	0	0	0	0	0	0	0	0	0	0	0	0	0	0	0	0	0	0	0	0	0	0	0	0	0	0	0	0	0	0	0	0	0	0	0
Cl	0	0	0	0	0	0	0	0	0	0	0	0	0	0	0	0	0	0	0	0	0	0	0	0	0	0	0	0	0	0	0	0	0	0	0	0	0	0	0	0	0	0	0	0	0	0	0	0	0
OH*	2	2	2	2	2	2	2	2	2	2	2	2	2	2	2	2	2	2	2	2	2	2	2	2	2	2	2	2	2	2	2	2	2	2	2	2	2	2	2	2	2	2	2	2	2	2	2	2	2
Total	16.9594	16.9719	17.3276	17.0152	17.0184	17.4313	17.802	18.0506	17.6786	17.8316	18.0939	18.0027	17.837	17.7176	17.7388	17.6802	17.5769	17.63	18.0094	17.9242	18.0046	18.098	17.7383	18.0793	18.0092	17.7557	18.0278	17.8962	18.1351	17.9705	17.898	17.8422	17.8348	17.7619	18.0193	17.8582	18.057	17.8577	17.8425	17.9657	18.0666	17.8167	17.7441	17.7754	17.9996	17.7744	18.0316	17.7711	18.0709
Calculation scheme	Џ15	Џ15	Џ15	Џ15	Џ15	Џ13	Џ13	Џ13	Џ13	Џ13	Џ13	Џ13	Џ13	Џ13	Џ13	Џ13	Џ13	Џ13	Џ13	Џ13	Џ13	Џ13	Џ13	Џ13	Џ13	Џ13	Џ13	Џ13	Џ13	Џ13	Џ13	Џ13	Џ13	Џ13	Џ13	Џ13	Џ13	Џ13	Џ13	Џ13	Џ13	Џ13	Џ13	Џ13	Џ13	Џ13	Џ13	Џ13	Џ13
Amphibole group	Fe-Mg-Mn	Fe-Mg-Mn	Fe-Mg-Mn	Fe-Mg-Mn	Fe-Mg-Mn	Na-Ca	Na-Ca	Na-Ca	Na-Ca	Na-Ca	Na-Ca	Na-Ca	Na-Ca	Na-Ca	Na-Ca	Ca	Ca	Na-Ca	Na-Ca	Na-Ca	Na-Ca	Na-Ca	Na-Ca	Na-Ca	Na-Ca	Na-Ca	Na-Ca	Na-Ca	Na-Ca	Na-Ca	Na-Ca	Na-Ca	Na-Ca	Na-Ca	Na-Ca	Na-Ca	Na-Ca	Na-Ca	Na-Ca	Na-Ca	Na-Ca	Na-Ca	Na-Ca	Na-Ca	Na-Ca	Na-Ca	Na-Ca	Na-Ca	Na-Ca
(Ca+Na) (B)	0.0806261	0.106504	0.0905643	0.0685444	0.239638	2	1.97602	2.03052	1.83292	2	2.09393	1.93357	2	1.81223	1.81693	2	1.96083	1.98237	1.95593	2	1.92864	2.09801	1.79413	2.04584	2.00917	1.78034	1.97171	2	2.13337	2	1.94303	1.93501	1.93033	1.78343	2.01928	1.94852	1.98792	1.97568	1.92393	2	2.06665	1.87851	1.79378	1.7883	2	1.7877	1.93026	1.78618	2.07089
Na (B)	0.0519302	0.0283036	0.0571196	0.00138451	0.0553438	1.01876	0.744133	1.09146	0.893129	1.13488	1.23994	1.04773	0.895542	0.867463	0.864504	0.591432	0.624511	0.762769	1.11317	1.02656	1.0556	1.13236	0.848067	1.13537	1.00995	0.843743	1.12554	0.919966	1.26667	0.960659	0.98749	0.935621	0.864237	0.843514	1.01827	0.930629	1.15811	0.868698	0.82214	0.979276	1.06851	0.937764	0.843208	0.840217	1.02291	0.848702	1.01363	0.830603	1.03618
(Na+K) (A)	0	0	0.327076	0.0138077	0.0175246	0.431333	0.80204	1	0.678562	0.83201	1	1	0.83697	0.717619	0.738798	0.680217	0.576888	0.630002	1	0.9242	1	1	0.738289	1	1	0.755694	1	0.896207	1	0.970529	0.897961	0.842208	0.834841	0.761887	1	0.858219	1	0.857712	0.842533	0.965673	1	0.816708	0.744148	0.77541	0.999567	0.774381	1	0.771119	1
Mg/(Mg+Fe2)	0.993327	0.61133	0.989334	0.244798	0.883235	0.979915	1	1	1	0.968168	0.998568	1	0.986081	1	1	0.969828	1	1	1	0.987885	1	0.999273	1	1	0.991221	1	1	0.98558	1	0.99255	1	1	1	1	0.993565	1	1	1	1	0.988431	0.980651	1	1	1	0.999249	1	1	1	0.985083
Fe3/(Fe3+Alvi)	0	0	0	1	0	0.560923	1	1	1	0	1	1	1	1	1	0.901556	1	1	1	1	1	1	1	1	1	1	1	1	1	1	1	1	1	1	1	1	1	1	1	1	1	1	1	1	1	1	1	1	1
Sum of S2	14.8788	14.8654	14.91	14.9328	14.7612	13	13.024	13.0201	13.1671	12.9996	13	13.0692	13	13.1878	13.1831	13	13.0392	13.0176	13.0535	13	13.0759	13	13.2059	13.0335	13	13.2197	13.0561	13	13.0017	13	13.057	13.065	13.0697	13.2166	13	13.0515	13.0691	13.0243	13.0761	13	13	13.1215	13.2062	13.2117	13	13.2123	13.1014	13.2138	13
Amphibole names
								potassian-		potassian-	potassian-	potassian-	potassian-			subcalcic sodian	subcalcic sodian		potassian-	potassian-	potassian-	potassium-		potassian-	potassian-		potassium-	potassian-	potassian-	potassian-					potassian-	potassian-	potassian-	potassian-		potassium-	potassian-				potassium-		potassian-		potassian-
	magnesio-anthophyllite	anthophyllite	magnesio-gedrite	dannemoreite	tirodite	winchite	richterite	richterite	richterite	richterite	richterite	richterite	richterite	richterite	richterite	silicic edenite	silicic edenite	richterite	richterite	richterite	richterite	richterite	richterite	richterite	richterite	richterite	richterite	richterite	richterite	richterite	richterite	richterite	richterite	richterite	richterite	richterite	richterite	richterite	richterite	richterite	richterite	richterite	richterite	richterite	richterite	richterite	richterite	richterite	richterite
Alternative name ?
(monoclinic alternative)			sodian
	magnesio-cummingtonite	cummingtonite	magnesio-cummingtonite
P (kbars)	not valid	not valid	not valid	not valid	not valid	not valid	not valid	not valid	not valid	not valid	not valid	not valid	not valid	not valid	not valid	not valid	not valid	not valid	not valid	not valid	not valid	not valid	not valid	not valid	not valid	not valid	not valid	not valid	not valid	not valid	not valid	not valid	not valid	not valid	not valid	not valid	not valid	not valid	not valid	not valid	not valid	not valid	not valid	not valid	not valid	not valid	not valid	not valid	not valid
Hammarstrom and Zen 86
Hollister et al. 87
Johnson & Rutherford 89
Schmidt 92
Barometers are only valid for certain calcic amphiboles
Hidden calculations	•	•	•	•	•	•	•	•	•	•	•	•	•	•	•	•	•	•	•	•	•	•	•	•	•	•	•	•	•	•	•	•	•	•	•	•	•	•	•	•	•	•	•	•	•	•	•	•	•
Part 1. Anion proportions	raw anions	raw anions	raw anions	raw anions	raw anions	raw anions	raw anions	raw anions	raw anions	raw anions	raw anions	raw anions	raw anions	raw anions	raw anions	raw anions	raw anions	raw anions	raw anions	raw anions	raw anions	raw anions	raw anions	raw anions	raw anions	raw anions	raw anions	raw anions	raw anions	raw anions	raw anions	raw anions	raw anions	raw anions	raw anions	raw anions	raw anions	raw anions	raw anions	raw anions	raw anions	raw anions	raw anions	raw anions	raw anions	raw anions	raw anions	raw anions	raw anions
Si	1.99719	1.74754	1.63137	1.6843	1.83975	1.95326	1.92357	1.901	1.899	1.898	1.89597	1.89434	1.89301	1.89267	1.89168	1.88993	1.88668	1.88635	1.88568	1.88502	1.88435	1.88432	1.88402	1.88353	1.88335	1.88335	1.88302	1.88302	1.88275	1.88269	1.88136	1.88136	1.88102	1.88102	1.88043	1.88003	1.87969	1.87969	1.87969	1.87936	1.87924	1.87803	1.87803	1.8777	1.87736	1.87736	1.87703	1.87703	1.87666
Ti	0	0	0.00500759	0	0	0.00150228	0.00624696	0.00550835	0.00175266	0.00400607	0.00399105	0.00350531	0.00475721	0.0012519	0.0012519	0.00846032	0.00175266	0.00450683	0.00625948	0.00525797	0.00500759	0.00625698	0.000751138	0.00450432	0.00525797	0.00150228	0.00575872	0.00625948	0.00393346	0.00375569	0.0060091	0.0012519	0.00250379	0.0012519	0.00570114	0.00575872	0.00500759	0.00450683	0.00500759	0.00650986	0.00477724	0.0012519	0.00150228	0.00150228	0.00776176	0.00100152	0.00425645	0.0012519	0.00437663
Al	0.0117693	0.129462	0.438701	0.00117693	0.0100039	0.0364848	0.056425	0.0102981	0.0306002	0.00617888	0.00704098	0.00617888	0.0220674	0.0285405	0.0276579	0.08887	0.0338367	0.0408983	0.00617888	0.0147116	0.0108866	0.0082238	0.029129	0.0125255	0.0129462	0.029129	0.00647311	0.0158886	0.00674381	0.012652	0.0229501	0.032954	0.0314829	0.0294232	0.0150088	0.0150059	0.00676735	0.0235386	0.0205963	0.0129462	0.0134523	0.0326598	0.0338367	0.0288348	0.0102981	0.0308944	0.00676735	0.0279521	0.0166683
Cr	0	0	0	0	0	0.0187512	0.0157431	0.00157905	0.0179617	0.00394762	0.00763273	0.00493453	0.00572405	0.0151983	0.0132245	0.0189367	0.00986906	0.0110533	0.00513191	0.00513191	0.00848739	0.00234094	0.01658	0.00704453	0.00375024	0.0155931	0.00532929	0.000394762	0.00465227	0.00177643	0.0134219	0.0144088	0.0104612	0.0161853	0.000353312	0.000394762	0.00493453	0.00690834	0.00907953	0.00296072	0.00321337	0.0197381	0.0189486	0.0161853	0.00296072	0.0185538	0.00473715	0.0157905	0.00194026
Fe3+	0	0	0	0	0	0	0	0	0	0	0	0	0	0	0	0	0	0	0	0	0	0	0	0	0	0	0	0	0	0	0	0	0	0	0	0	0	0	0	0	0	0	0	0	0	0	0	0	0
Fe2+	0.00556743	0.283939	0.00765522	0.502461	0.062912	0.0418949	0.0361062	0.0197644	0.038972	0.017955	0.0280947	0.0290898	0.0285331	0.0399463	0.0392504	0.0398169	0.0289507	0.0322911	0.0347965	0.0384153	0.031456	0.0229726	0.0402247	0.0327142	0.0260277	0.0395288	0.033683	0.0315952	0.0284357	0.0286723	0.0310384	0.0327087	0.0296466	0.0399463	0.0396206	0.0242183	0.0347965	0.0272804	0.0274196	0.0293682	0.0386923	0.0384153	0.0392504	0.039668	0.027698	0.0392504	0.0286723	0.0405031	0.0346489
Mn	0.00845816	0.00422908	0	0.0817622	0.234291	0.00112775	0.000649869	0	0.00112775	0.000140969	0.000294626	0.000422908	0.000281939	0.00112775	0.00112775	0.00064423	0.000704847	0.000704847	0.000422908	0.000704847	0.000422908	0.000108546	0.00112775	0.000680882	0.000281939	0.00126872	0.000281939	0.000422908	0.000160705	0.000422908	0.000422908	0.000563877	0.000281939	0.00126872	0.000486344	0.000140969	0.000422908	0.000422908	0.000563877	0.000422908	0.000508899	0.000704847	0.00112775	0.000986786	0.000281939	0.00112775	0.000422908	0.000986786	0.000376388
Mg	0.828694	0.446601	0.710096	0.158792	0.475879	0.527982	0.5956	0.59398	0.578597	0.546094	0.580557	0.59001	0.57165	0.585792	0.587777	0.566377	0.578597	0.566688	0.580086	0.564703	0.586288	0.590953	0.588769	0.587082	0.579589	0.592739	0.58207	0.57289	0.583209	0.579341	0.577108	0.574379	0.583063	0.591995	0.57853	0.581822	0.584552	0.581326	0.590754	0.574627	0.576024	0.57562	0.587529	0.592491	0.579341	0.590754	0.597701	0.592987	0.581825
Ni	0	0	0	0	0	0	0	0	0	0	0	0	0	0	0	0	0	0	0	0	0	0	0	0	0	0	0	0	0	0	0	0	0	0	0	0	0	0	0	0	0	0	0	0	0	0	0	0	0
Zn	0	0	0	0	0	0	0	0	0	0	0	0	0	0	0	0	0	0	0	0	0	0	0	0	0	0	0	0	0	0	0	0	0	0	0	0	0	0	0	0	0	0	0	0	0	0	0	0	0
Li	0	0	0	0	0	0	0	0	0	0	0	0	0	0	0	0	0	0	0	0	0	0	0	0	0	0	0	0	0	0	0	0	0	0	0	0	0	0	0	0	0	0	0	0	0	0	0	0	0
Ca	0.00356637	0.00891593	0.00410133	0.00713274	0.0212199	0.119652	0.155629	0.113589	0.114302	0.101285	0.10305	0.106813	0.133204	0.114837	0.115729	0.176386	0.162092	0.148004	0.101285	0.116977	0.105208	0.116351	0.114837	0.110201	0.120008	0.113767	0.101642	0.129638	0.104174	0.124823	0.115372	0.1209	0.129103	0.114124	0.121041	0.121613	0.0996801	0.133561	0.133204	0.122327	0.120417	0.113946	0.115372	0.115015	0.117155	0.113946	0.110201	0.115907	0.124942
Na	0.00322698	0.00161349	0.023557	0.000806746	0.00419508	0.0837402	0.0917722	0.0976162	0.091969	0.0939052	0.1148	0.100843	0.0863218	0.0929371	0.0939052	0.0748386	0.0637329	0.0776089	0.0987457	0.0940665	0.103263	0.0976017	0.0927758	0.113871	0.0930985	0.0937438	0.0976162	0.0790611	0.11607	0.088258	0.0990684	0.0971322	0.0940665	0.0940665	0.0931824	0.0821267	0.101489	0.0856764	0.0884193	0.0837402	0.0983584	0.100521	0.0926144	0.0943892	0.0863218	0.0945506	0.0950346	0.0937438	0.0996008
K	0	0	0	0	0	0.00467111	0.00589515	0.028876	0.0036095	0.0212323	0.0203469	0.0226124	0.0181536	0.00339717	0.00350333	0.00478152	0.0091299	0.00690051	0.028239	0.0231432	0.0205954	0.0308622	0.00350333	0.0153595	0.027602	0.00339717	0.0300437	0.0299376	0.0201527	0.0277082	0.0147565	0.0104038	0.00881141	0.00339717	0.0288409	0.0247357	0.0281328	0.0184721	0.0122086	0.0328039	0.0264162	0.00573273	0.00371566	0.0036095	0.0349272	0.00392798	0.0260096	0.00339717	0.0233354
Ba	0	0	0	0	0	0	0	0	0	0	0	0	0	0	0	0	0	0	0	0	0	0	0	0	0	0	0	0	0	0	0	0	0	0	0	0	0	0	0	0	0	0	0	0	0	0	0	0	0
Sr	0	0	0	0	0	0	0	0	0	0	0	0	0	0	0	0	0	0	0	0	0	0	0	0	0	0	0	0	0	0	0	0	0	0	0	0	0	0	0	0	0	0	0	0	0	0	0	0	0
Pb	0	0	0	0	0	0	0	0	0	0	0	0	0	0	0	0	0	0	0	0	0	0	0	0	0	0	0	0	0	0	0	0	0	0	0	0	0	0	0	0	0	0	0	0	0	0	0	0	0
F	0	0	0	0	0	0	0	0	0	0	0	0	0	0	0	0	0	0	0	0	0	0	0	0	0	0	0	0	0	0	0	0	0	0	0	0	0	0	0	0	0	0	0	0	0	0	0	0	0
Cl	0	0	0	0	0	0	0	0	0	0	0	0	0	0	0	0	0	0	0	0	0	0	0	0	0	0	0	0	0	0	0	0	0	0	0	0	0	0	0	0	0	0	0	0	0	0	0	0	0
Total-F-Cl	2.85848	2.62231	2.82049	2.43643	2.64825	2.78906	2.88764	2.77221	2.77789	2.69275	2.76177	2.75875	2.7637	2.7757	2.7751	2.86904	2.77535	2.77501	2.74683	2.74813	2.75597	2.75999	2.77172	2.76751	2.75192	2.77402	2.74592	2.74911	2.75029	2.7501	2.7615	2.76606	2.77044	2.77268	2.7632	2.73584	2.74547	2.76138	2.76695	2.74507	2.7611	2.76662	2.77192	2.77038	2.74411	2.77137	2.75083	2.76955	2.76437
Part 2. Cation proportions	raw cations	raw cations	raw cations	raw cations	raw cations	raw cations	raw cations	raw cations	raw cations	raw cations	raw cations	raw cations	raw cations	raw cations	raw cations	raw cations	raw cations	raw cations	raw cations	raw cations	raw cations	raw cations	raw cations	raw cations	raw cations	raw cations	raw cations	raw cations	raw cations	raw cations	raw cations	raw cations	raw cations	raw cations	raw cations	raw cations	raw cations	raw cations	raw cations	raw cations	raw cations	raw cations	raw cations	raw cations	raw cations	raw cations	raw cations	raw cations	raw cations
Si	0.998597	0.873772	0.815687	0.84215	0.919874	0.976628	0.961784	0.950498	0.949499	0.949	0.947983	0.947169	0.946503	0.946337	0.945838	0.944964	0.943341	0.943175	0.942842	0.942509	0.942176	0.942161	0.94201	0.941763	0.941677	0.941677	0.941511	0.941511	0.941377	0.941344	0.940678	0.940678	0.940512	0.940512	0.940216	0.940013	0.939846	0.939846	0.939846	0.93968	0.93962	0.939014	0.939014	0.938848	0.938681	0.938681	0.938515	0.938515	0.938328
Ti	0	0	0.00250379	0	0	0.000751138	0.00312348	0.00275417	0.000876328	0.00200303	0.00199552	0.00175266	0.0023786	0.000625948	0.000625948	0.00423016	0.000876328	0.00225341	0.00312974	0.00262898	0.00250379	0.00312849	0.000375569	0.00225216	0.00262898	0.000751138	0.00287936	0.00312974	0.00196673	0.00187784	0.00300455	0.000625948	0.0012519	0.000625948	0.00285057	0.00287936	0.00250379	0.00225341	0.00250379	0.00325493	0.00238862	0.000625948	0.000751138	0.000751138	0.00388088	0.000500759	0.00212822	0.000625948	0.00218832
Al	0.0078462	0.0863082	0.292467	0.00078462	0.00666927	0.0243232	0.0376166	0.00686542	0.0204001	0.00411925	0.00469399	0.00411925	0.0147116	0.019027	0.0184386	0.0592466	0.0225578	0.0272655	0.00411925	0.00980775	0.00725773	0.00548253	0.0194193	0.00835032	0.00863082	0.0194193	0.00431541	0.0105924	0.00449587	0.00843466	0.0153001	0.0219694	0.0209886	0.0196155	0.0100059	0.0100039	0.00451156	0.0156924	0.0137308	0.00863082	0.00896821	0.0217732	0.0225578	0.0192232	0.00686542	0.0205963	0.00451156	0.0186347	0.0111122
Cr	0	0	0	0	0	0.0125008	0.0104954	0.0010527	0.0119745	0.00263175	0.00508849	0.00328969	0.00381604	0.0101322	0.00881636	0.0126245	0.00657937	0.0073689	0.00342127	0.00342127	0.00565826	0.00156063	0.0110533	0.00469636	0.00250016	0.0103954	0.00355286	0.000263175	0.00310152	0.00118429	0.00894795	0.00960588	0.00697413	0.0107902	0.000235542	0.000263175	0.00328969	0.00460556	0.00605302	0.00197381	0.00214224	0.0131587	0.0126324	0.0107902	0.00197381	0.0123692	0.0031581	0.010527	0.0012935
Fe3+	0	0	0	0	0	0	0	0	0	0	0	0	0	0	0	0	0	0	0	0	0	0	0	0	0	0	0	0	0	0	0	0	0	0	0	0	0	0	0	0	0	0	0	0	0	0	0	0	0
Fe2+	0.00556743	0.283939	0.00765522	0.502461	0.062912	0.0418949	0.0361062	0.0197644	0.038972	0.017955	0.0280947	0.0290898	0.0285331	0.0399463	0.0392504	0.0398169	0.0289507	0.0322911	0.0347965	0.0384153	0.031456	0.0229726	0.0402247	0.0327142	0.0260277	0.0395288	0.033683	0.0315952	0.0284357	0.0286723	0.0310384	0.0327087	0.0296466	0.0399463	0.0396206	0.0242183	0.0347965	0.0272804	0.0274196	0.0293682	0.0386923	0.0384153	0.0392504	0.039668	0.027698	0.0392504	0.0286723	0.0405031	0.0346489
Mn	0.00845816	0.00422908	0	0.0817622	0.234291	0.00112775	0.000649869	0	0.00112775	0.000140969	0.000294626	0.000422908	0.000281939	0.00112775	0.00112775	0.00064423	0.000704847	0.000704847	0.000422908	0.000704847	0.000422908	0.000108546	0.00112775	0.000680882	0.000281939	0.00126872	0.000281939	0.000422908	0.000160705	0.000422908	0.000422908	0.000563877	0.000281939	0.00126872	0.000486344	0.000140969	0.000422908	0.000422908	0.000563877	0.000422908	0.000508899	0.000704847	0.00112775	0.000986786	0.000281939	0.00112775	0.000422908	0.000986786	0.000376388
Mg	0.828694	0.446601	0.710096	0.158792	0.475879	0.527982	0.5956	0.59398	0.578597	0.546094	0.580557	0.59001	0.57165	0.585792	0.587777	0.566377	0.578597	0.566688	0.580086	0.564703	0.586288	0.590953	0.588769	0.587082	0.579589	0.592739	0.58207	0.57289	0.583209	0.579341	0.577108	0.574379	0.583063	0.591995	0.57853	0.581822	0.584552	0.581326	0.590754	0.574627	0.576024	0.57562	0.587529	0.592491	0.579341	0.590754	0.597701	0.592987	0.581825
Ni	0	0	0	0	0	0	0	0	0	0	0	0	0	0	0	0	0	0	0	0	0	0	0	0	0	0	0	0	0	0	0	0	0	0	0	0	0	0	0	0	0	0	0	0	0	0	0	0	0
Zn	0	0	0	0	0	0	0	0	0	0	0	0	0	0	0	0	0	0	0	0	0	0	0	0	0	0	0	0	0	0	0	0	0	0	0	0	0	0	0	0	0	0	0	0	0	0	0	0	0
Li	0	0	0	0	0	0	0	0	0	0	0	0	0	0	0	0	0	0	0	0	0	0	0	0	0	0	0	0	0	0	0	0	0	0	0	0	0	0	0	0	0	0	0	0	0	0	0	0	0
Ca	0.00356637	0.00891593	0.00410133	0.00713274	0.0212199	0.119652	0.155629	0.113589	0.114302	0.101285	0.10305	0.106813	0.133204	0.114837	0.115729	0.176386	0.162092	0.148004	0.101285	0.116977	0.105208	0.116351	0.114837	0.110201	0.120008	0.113767	0.101642	0.129638	0.104174	0.124823	0.115372	0.1209	0.129103	0.114124	0.121041	0.121613	0.0996801	0.133561	0.133204	0.122327	0.120417	0.113946	0.115372	0.115015	0.117155	0.113946	0.110201	0.115907	0.124942
Na	0.00645397	0.00322698	0.0471139	0.00161349	0.00839016	0.16748	0.183544	0.195232	0.183938	0.18781	0.2296	0.201686	0.172644	0.185874	0.18781	0.149677	0.127466	0.155218	0.197491	0.188133	0.206527	0.195203	0.185552	0.227741	0.186197	0.187488	0.195232	0.158122	0.232139	0.176516	0.198137	0.194264	0.188133	0.188133	0.186365	0.164253	0.202977	0.171353	0.176839	0.16748	0.196717	0.201041	0.185229	0.188778	0.172644	0.189101	0.190069	0.187488	0.199202
K	0	0	0	0	0	0.00934222	0.0117903	0.0577519	0.00721899	0.0424646	0.0406939	0.0452249	0.0363073	0.00679434	0.00700667	0.00956304	0.0182598	0.013801	0.056478	0.0462865	0.0411907	0.0617245	0.00700667	0.0307189	0.055204	0.00679434	0.0600875	0.0598752	0.0403053	0.0554164	0.0295129	0.0208077	0.0176228	0.00679434	0.0576819	0.0494713	0.0562657	0.0369442	0.0244172	0.0656079	0.0528324	0.0114655	0.00743131	0.00721899	0.0698543	0.00785596	0.0520192	0.00679434	0.0466708
Ba	0	0	0	0	0	0	0	0	0	0	0	0	0	0	0	0	0	0	0	0	0	0	0	0	0	0	0	0	0	0	0	0	0	0	0	0	0	0	0	0	0	0	0	0	0	0	0	0	0
Sr	0	0	0	0	0	0	0	0	0	0	0	0	0	0	0	0	0	0	0	0	0	0	0	0	0	0	0	0	0	0	0	0	0	0	0	0	0	0	0	0	0	0	0	0	0	0	0	0	0
Pb	0	0	0	0	0	0	0	0	0	0	0	0	0	0	0	0	0	0	0	0	0	0	0	0	0	0	0	0	0	0	0	0	0	0	0	0	0	0	0	0	0	0	0	0	0	0	0	0	0
F	0	0	0	0	0	0	0	0	0	0	0	0	0	0	0	0	0	0	0	0	0	0	0	0	0	0	0	0	0	0	0	0	0	0	0	0	0	0	0	0	0	0	0	0	0	0	0	0	0
Cl	0	0	0	0	0	0	0	0	0	0	0	0	0	0	0	0	0	0	0	0	0	0	0	0	0	0	0	0	0	0	0	0	0	0	0	0	0	0	0	0	0	0	0	0	0	0	0	0	0
Total	1.85918	1.70699	1.87962	1.5947	1.72924	1.88168	1.99634	1.94149	1.90691	1.8535	1.94205	1.92958	1.91003	1.91049	1.91242	1.96353	1.88942	1.89677	1.92407	1.91359	1.92869	1.93965	1.91038	1.9462	1.92275	1.91383	1.92526	1.90804	1.93937	1.91803	1.91952	1.9165	1.91758	1.9138	1.93703	1.89468	1.92885	1.91328	1.91533	1.91337	1.93831	1.91576	1.91089	1.91377	1.91838	1.91418	1.9274	1.91297	1.94059
Si to Ca sum (Sum FM+Ca+Sr)	1.85273	1.70377	1.83251	1.59308	1.72085	1.70486	1.801	1.6885	1.71575	1.62323	1.67176	1.68267	1.70108	1.71783	1.7176	1.80429	1.7437	1.72775	1.6701	1.67917	1.68097	1.68272	1.71782	1.68774	1.68134	1.71955	1.66994	1.69004	1.66692	1.6861	1.69187	1.70143	1.71182	1.71888	1.69299	1.68095	1.6696	1.70499	1.71408	1.68028	1.68876	1.70326	1.71823	1.71777	1.67588	1.71723	1.68531	1.71869	1.69471
Si to Li sum (Sum FM)	1.84916	1.69485	1.82841	1.58595	1.69963	1.58521	1.64538	1.57491	1.60145	1.52194	1.56871	1.57585	1.56787	1.60299	1.60187	1.6279	1.58161	1.57975	1.56882	1.56219	1.57576	1.56637	1.60298	1.57754	1.56134	1.60578	1.56829	1.5604	1.56275	1.56128	1.5765	1.58053	1.58272	1.60475	1.57194	1.55934	1.56992	1.57143	1.58087	1.55796	1.56834	1.58931	1.60286	1.60276	1.55872	1.60328	1.57511	1.60278	1.56977
Part 3a. Џ13 normalized based on anions
Si	14.0407	13.4042	11.5991	13.8062	14.0718	16.0183	15.198	15.6916	15.4154	16.2122	15.712	15.6273	15.6958	15.3493	15.3519	15.0925	15.5076	15.5231	15.6257	15.6865	15.5459	15.6389	15.2792	15.5215	15.6812	15.2472	15.6089	15.6878	15.662	15.6762	15.5139	15.4743	15.4502	15.238	15.5512	15.6735	15.5651	15.5502	15.4573	15.6819	15.577	15.3616	15.2317	15.23	15.6575	15.2224	15.4919	15.2244	15.5414
Ti	0	0	0.035604	0	0	0.0123199	0.0493568	0.0454682	0.0142275	0.0342187	0.0330741	0.0289171	0.0394443	0.0101527	0.0101598	0.0675618	0.0144059	0.0370875	0.0518692	0.043755	0.0413124	0.0519296	0.00609165	0.0371187	0.0437789	0.0121621	0.0477356	0.0521488	0.0327212	0.0312718	0.0495517	0.010297	0.0205655	0.0101415	0.0471485	0.0480097	0.0414661	0.0372838	0.0411789	0.05432	0.0395985	0.0102401	0.0121842	0.012185	0.0647343	0.00812068	0.0351302	0.010154	0.0362449
Al	0.0827406	0.993014	3.11916	0.00964727	0.0765173	0.299205	0.44581	0.0850051	0.248402	0.0527782	0.0583492	0.0509727	0.182972	0.23146	0.224457	0.709692	0.278121	0.336559	0.0512013	0.122425	0.0898141	0.0682531	0.236233	0.103218	0.107793	0.235821	0.0536574	0.13237	0.0560996	0.105347	0.189249	0.27105	0.258591	0.238356	0.124123	0.125102	0.0560381	0.194729	0.16937	0.108027	0.111506	0.267145	0.274432	0.233879	0.0858881	0.250504	0.0558536	0.226717	0.138038
Cr	0	0	0	0	0	0.153775	0.124385	0.0130341	0.145807	0.0337194	0.063253	0.0407074	0.0474609	0.123256	0.107324	0.151224	0.0811186	0.0909599	0.0425256	0.042706	0.0700207	0.0194285	0.134462	0.0580517	0.0312253	0.126238	0.0441759	0.00328883	0.0387008	0.0147915	0.110679	0.118514	0.0859254	0.131116	0.0029219	0.00329108	0.0408612	0.0571509	0.0746638	0.024705	0.0266356	0.161451	0.153682	0.131279	0.0246929	0.150441	0.0390976	0.128075	0.0160681
Fe3+	0	0	0	0	0	0	0	0	0	0	0	0	0	0	0	0	0	0	0	0	0	0	0	0	0	0	0	0	0	0	0	0	0	0	0	0	0	0	0	0	0	0	0	0	0	0	0	0	0
Fe2+	0.0391402	2.1779	0.0544286	4.11866	0.481198	0.343573	0.285273	0.163143	0.316362	0.153366	0.232823	0.239977	0.236582	0.323959	0.318536	0.317967	0.23796	0.265729	0.288341	0.319679	0.259511	0.19066	0.326218	0.269588	0.216712	0.320015	0.279207	0.263225	0.236547	0.23874	0.255946	0.269032	0.243509	0.323603	0.327663	0.201905	0.288138	0.225684	0.22548	0.245056	0.32072	0.314223	0.31834	0.321748	0.231006	0.318257	0.236644	0.328517	0.286943
Mn	0.0594627	0.0324383	0	0.670204	1.79203	0.00924851	0.00513457	0	0.00915473	0.00120412	0.00244159	0.00348878	0.00233769	0.00914593	0.00915229	0.00514465	0.00579348	0.0058003	0.00350443	0.00586549	0.00348898	0.000900877	0.00914597	0.00561093	0.00234748	0.0102713	0.00233706	0.00352332	0.00133685	0.00352135	0.00348735	0.00463794	0.00231577	0.0102778	0.00402207	0.00117524	0.00350196	0.00349861	0.00463694	0.00352885	0.00421827	0.00576539	0.00914664	0.00800384	0.00235142	0.00914426	0.00349043	0.00800373	0.00311704
Mg	5.82589	3.42556	5.04879	1.30161	3.63987	4.32988	4.7058	4.90296	4.69685	4.66458	4.81112	4.86729	4.73982	4.75069	4.7701	4.52294	4.75577	4.66337	4.80688	4.69926	4.83686	4.90459	4.77486	4.83796	4.82578	4.79867	4.82494	4.77285	4.85153	4.82389	4.7589	4.72432	4.78911	4.79571	4.78445	4.85057	4.84048	4.80916	4.85796	4.79484	4.77466	4.70836	4.76515	4.80571	4.8318	4.79006	4.93307	4.80967	4.81836
Ni	0	0	0	0	0	0	0	0	0	0	0	0	0	0	0	0	0	0	0	0	0	0	0	0	0	0	0	0	0	0	0	0	0	0	0	0	0	0	0	0	0	0	0	0	0	0	0	0	0
Zn	0	0	0	0	0	0	0	0	0	0	0	0	0	0	0	0	0	0	0	0	0	0	0	0	0	0	0	0	0	0	0	0	0	0	0	0	0	0	0	0	0	0	0	0	0	0	0	0	0
Li	0	0	0	0	0	0	0	0	0	0	0	0	0	0	0	0	0	0	0	0	0	0	0	0	0	0	0	0	0	0	0	0	0	0	0	0	0	0	0	0	0	0	0	0	0	0	0	0	0
Ca	0.0250723	0.0683878	0.0291605	0.058467	0.162306	0.981242	1.22962	0.937611	0.927866	0.865146	0.853986	0.881152	1.10446	0.931313	0.939196	1.40857	1.33231	1.21795	0.839298	0.973442	0.867963	0.965651	0.931317	0.90813	0.999214	0.921032	0.842534	1.08003	0.866588	1.03934	0.951372	0.994413	1.06041	0.92451	1.00101	1.01387	0.825418	1.10491	1.09538	1.02072	0.998134	0.932034	0.935725	0.932893	0.977095	0.923914	0.909532	0.940112	1.03471
Na	0.0226864	0.012376	0.16749	0.00661288	0.0320871	0.686738	0.725086	0.805765	0.746573	0.802111	0.951356	0.831906	0.715735	0.753706	0.762087	0.597641	0.523852	0.638657	0.818256	0.782789	0.85192	0.810041	0.752402	0.938371	0.775157	0.758927	0.809167	0.658672	0.965547	0.734881	0.816929	0.79892	0.772636	0.762027	0.770619	0.684679	0.840393	0.708778	0.7271	0.69875	0.815293	0.822222	0.751148	0.765593	0.719938	0.766652	0.784358	0.760348	0.82484
K	0	0	0	0	0	0.0383069	0.0465772	0.238354	0.0293007	0.18136	0.168617	0.186541	0.150521	0.0275506	0.0284313	0.0381839	0.0750431	0.0567854	0.234002	0.19259	0.169911	0.25614	0.0284117	0.126572	0.22982	0.0275027	0.249041	0.249415	0.167644	0.230713	0.121683	0.0855724	0.0723745	0.0275203	0.238515	0.206218	0.232959	0.152815	0.100395	0.273725	0.218964	0.0468917	0.0301358	0.0292767	0.291298	0.0318495	0.214667	0.0275542	0.193251
Ba	0	0	0	0	0	0	0	0	0	0	0	0	0	0	0	0	0	0	0	0	0	0	0	0	0	0	0	0	0	0	0	0	0	0	0	0	0	0	0	0	0	0	0	0	0	0	0	0	0
Sr	0	0	0	0	0	0	0	0	0	0	0	0	0	0	0	0	0	0	0	0	0	0	0	0	0	0	0	0	0	0	0	0	0	0	0	0	0	0	0	0	0	0	0	0	0	0	0	0	0
Pb	0	0	0	0	0	0	0	0	0	0	0	0	0	0	0	0	0	0	0	0	0	0	0	0	0	0	0	0	0	0	0	0	0	0	0	0	0	0	0	0	0	0	0	0	0	0	0	0	0
F	0	0	0	0	0	0	0	0	0	0	0	0	0	0	0	0	0	0	0	0	0	0	0	0	0	0	0	0	0	0	0	0	0	0	0	0	0	0	0	0	0	0	0	0	0	0	0	0	0
Cl	0	0	0	0	0	0	0	0	0	0	0	0	0	0	0	0	0	0	0	0	0	0	0	0	0	0	0	0	0	0	0	0	0	0	0	0	0	0	0	0	0	0	0	0	0	0	0	0	0
Total exc. F,Cl	20.0957	20.1139	20.0537	19.9714	20.2558	22.8726	22.815	22.8829	22.55	23.0006	22.887	22.7583	22.9152	22.5105	22.5213	22.9114	22.8119	22.836	22.7616	22.869	22.7367	22.9065	22.4783	22.8062	22.913	22.4578	22.7617	22.9033	22.8788	22.8987	22.7717	22.7511	22.7556	22.4613	22.8517	22.8083	22.7344	22.8442	22.7535	22.9055	22.8867	22.6299	22.4817	22.4706	22.8863	22.4713	22.7037	22.4636	22.893
Part 3b. Џ15 normalized based on anions
Si	16.1696	15.3854	13.3536	15.8589	16.0364	17.1855	16.0208	16.8877	16.6021	17.5391	17.0117	16.8869	16.6924	16.5268	16.5202	15.712	16.23	16.3769	16.9362	16.8389	16.8149	16.7971	16.4513	16.7401	16.8022	16.4289	16.914	16.7128	16.9422	16.7489	16.6799	16.5862	16.4827	16.415	16.6608	16.7764	16.8875	16.537	16.4493	16.7772	16.6919	16.5391	16.395	16.3965	16.8034	16.3988	16.7064	16.382	16.6104
Ti	0	0	0.0409896	0	0	0.0132176	0.052029	0.048934	0.0153227	0.0370194	0.03581	0.0312478	0.0419487	0.0109315	0.0109329	0.070335	0.015077	0.0391274	0.0562195	0.0469694	0.0446848	0.0557756	0.00655895	0.0400327	0.0469086	0.0131047	0.0517271	0.0555562	0.0353957	0.0334116	0.0532762	0.0110369	0.0219397	0.0109248	0.0505126	0.051388	0.044989	0.0396498	0.0438218	0.0581139	0.0424326	0.011025	0.0131147	0.0131182	0.0694719	0.00874827	0.0378843	0.010926	0.0387378
Al	0.0952862	1.13979	3.59098	0.0110816	0.0872005	0.321007	0.469946	0.0914846	0.267523	0.0570981	0.0631759	0.0550812	0.194589	0.249215	0.241539	0.738822	0.291077	0.355071	0.0554955	0.131419	0.0971456	0.0733082	0.254355	0.111322	0.115499	0.254099	0.058144	0.141019	0.060685	0.112556	0.203474	0.290526	0.275872	0.256766	0.132979	0.133905	0.060799	0.207086	0.180239	0.115572	0.119487	0.287624	0.295391	0.251792	0.0921738	0.269863	0.0602324	0.243954	0.147532
Cr	0	0	0	0	0	0.16498	0.131119	0.0140277	0.157031	0.0364793	0.0684854	0.0439885	0.0504743	0.132712	0.115491	0.157431	0.0848976	0.095963	0.0460922	0.0458434	0.0757365	0.0208675	0.144777	0.0626091	0.0334575	0.136022	0.0478697	0.00350372	0.0418641	0.0158036	0.118998	0.12703	0.0916673	0.141243	0.00313038	0.00352266	0.0443327	0.0607776	0.0794556	0.0264305	0.0285419	0.173827	0.165419	0.141333	0.0265	0.162068	0.0421627	0.137813	0.0171733
Fe3+	0	0	0	0	0	0	0	0	0	0	0	0	0	0	0	0	0	0	0	0	0	0	0	0	0	0	0	0	0	0	0	0	0	0	0	0	0	0	0	0	0	0	0	0	0	0	0	0	0
Fe2+	0.0450749	2.49981	0.0626617	4.73103	0.548382	0.368607	0.300717	0.175579	0.340714	0.165919	0.252082	0.259319	0.251603	0.34881	0.342778	0.331019	0.249045	0.280345	0.312524	0.343164	0.280695	0.204781	0.351243	0.290752	0.232205	0.344819	0.302553	0.280424	0.255882	0.255076	0.275184	0.288363	0.259781	0.348597	0.351042	0.216112	0.312617	0.240005	0.239951	0.262172	0.343674	0.33831	0.342652	0.34639	0.247912	0.342853	0.255196	0.353494	0.306679
Mn	0.0684787	0.0372329	0	0.769849	2.04223	0.00992241	0.00541255	0	0.00985944	0.00130268	0.00264356	0.00376998	0.00248612	0.00984752	0.0098488	0.00535582	0.00606338	0.00611935	0.00379834	0.0062964	0.00377378	0.000967599	0.00984757	0.00605142	0.0025153	0.0110674	0.00253248	0.00375353	0.00144613	0.0037623	0.00374947	0.0049712	0.00247052	0.0110717	0.00430905	0.00125794	0.00379948	0.00372063	0.00493453	0.00377533	0.00452017	0.00620734	0.00984518	0.00861684	0.0025235	0.00985096	0.00376407	0.00861226	0.00333143
Mg	6.70924	3.93189	5.81249	1.49514	4.14807	4.64539	4.96056	5.27668	5.0584	5.04637	5.2091	5.2596	5.04077	5.11512	5.13312	4.70859	4.97732	4.91987	5.21003	5.04449	5.23169	5.26784	5.14114	5.21777	5.17077	5.1706	5.22838	5.0847	5.24808	5.15397	5.11659	5.06379	5.10915	5.16612	5.12583	5.19189	5.25171	5.11434	5.16973	5.12973	5.11639	5.06928	5.12906	5.17377	5.18541	5.16025	5.31981	5.17535	5.14976
Ni	0	0	0	0	0	0	0	0	0	0	0	0	0	0	0	0	0	0	0	0	0	0	0	0	0	0	0	0	0	0	0	0	0	0	0	0	0	0	0	0	0	0	0	0	0	0	0	0	0
Zn	0	0	0	0	0	0	0	0	0	0	0	0	0	0	0	0	0	0	0	0	0	0	0	0	0	0	0	0	0	0	0	0	0	0	0	0	0	0	0	0	0	0	0	0	0	0	0	0	0
Li	0	0	0	0	0	0	0	0	0	0	0	0	0	0	0	0	0	0	0	0	0	0	0	0	0	0	0	0	0	0	0	0	0	0	0	0	0	0	0	0	0	0	0	0	0	0	0	0	0
Ca	0.0288739	0.0784961	0.0335714	0.0671599	0.184967	1.05274	1.29619	1.00908	0.999291	0.935958	0.924629	0.952175	1.17458	1.00275	1.01067	1.46639	1.39438	1.28495	0.90969	1.04496	0.938814	1.03717	1.00276	0.979424	1.07065	0.992418	0.912984	1.1506	0.937421	1.11046	1.02288	1.06587	1.13128	0.995917	1.07243	1.08522	0.895544	1.17503	1.16568	1.09202	1.06957	1.00348	1.00719	1.00434	1.0486	0.995317	0.980836	1.01159	1.10587
Na	0.0261262	0.0142052	0.192825	0.00759608	0.036567	0.736778	0.764341	0.867184	0.804042	0.867763	1.03005	0.898959	0.76118	0.811524	0.820084	0.622172	0.548256	0.673786	0.886883	0.840297	0.921462	0.870036	0.810119	1.01204	0.830572	0.817749	0.876827	0.701708	1.04447	0.785167	0.878332	0.856328	0.824268	0.820884	0.825604	0.732858	0.911791	0.753757	0.773764	0.747554	0.873644	0.88525	0.808514	0.824229	0.772626	0.825901	0.84585	0.818158	0.881571
K	0	0	0	0	0	0.0410982	0.0490989	0.256523	0.0315561	0.196204	0.182565	0.201577	0.160078	0.029664	0.030595	0.0397513	0.0785391	0.0599089	0.253628	0.206739	0.183781	0.275111	0.0305911	0.136509	0.24625	0.0296343	0.269864	0.265712	0.181346	0.246499	0.13083	0.0917214	0.0772109	0.0296458	0.255533	0.220729	0.25275	0.162513	0.106838	0.292843	0.234635	0.0504862	0.0324373	0.031519	0.312617	0.034311	0.231497	0.0296491	0.206543
Ba	0	0	0	0	0	0	0	0	0	0	0	0	0	0	0	0	0	0	0	0	0	0	0	0	0	0	0	0	0	0	0	0	0	0	0	0	0	0	0	0	0	0	0	0	0	0	0	0	0
Sr	0	0	0	0	0	0	0	0	0	0	0	0	0	0	0	0	0	0	0	0	0	0	0	0	0	0	0	0	0	0	0	0	0	0	0	0	0	0	0	0	0	0	0	0	0	0	0	0	0
Pb	0	0	0	0	0	0	0	0	0	0	0	0	0	0	0	0	0	0	0	0	0	0	0	0	0	0	0	0	0	0	0	0	0	0	0	0	0	0	0	0	0	0	0	0	0	0	0	0	0
F	0	0	0	0	0	0	0	0	0	0	0	0	0	0	0	0	0	0	0	0	0	0	0	0	0	0	0	0	0	0	0	0	0	0	0	0	0	0	0	0	0	0	0	0	0	0	0	0	0
Cl	0	0	0	0	0	0	0	0	0	0	0	0	0	0	0	0	0	0	0	0	0	0	0	0	0	0	0	0	0	0	0	0	0	0	0	0	0	0	0	0	0	0	0	0	0	0	0	0	0
Total exc. F,Cl	23.1427	23.0868	23.0871	22.9407	23.0839	24.5392	24.0502	24.6272	24.2858	24.8832	24.7803	24.5926	24.3701	24.2373	24.2353	23.8518	23.8747	24.0921	24.6706	24.549	24.5926	24.603	24.2027	24.5966	24.551	24.1984	24.6649	24.3998	24.7488	24.4656	24.4833	24.3859	24.2763	24.1962	24.4822	24.4133	24.6658	24.2939	24.2137	24.5054	24.5248	24.3646	24.1986	24.1916	24.5612	24.208	24.4836	24.1715	24.4676
Part 4. Iron oxidation state calculations
Џ13 Fe3+	5.80863	5.77228	5.89257	6.05723	5.48844	0.254824	0.369976	0.234101	0.900063	-0.00127632	0.225921	0.483425	0.169677	0.978924	0.957339	0.177255	0.376128	0.328015	0.476819	0.262051	0.526691	0.187091	1.04331	0.387678	0.173973	1.08437	0.4767	0.193393	0.242478	0.202533	0.45665	0.497867	0.488709	1.07738	0.296678	0.383357	0.531292	0.311589	0.493092	0.188933	0.226512	0.740137	1.03666	1.05883	0.227375	1.05739	0.592588	1.07287	0.213978
Џ13 Fe3+ = 0 if Fe3+ < 0	5.80863	5.77228	5.89257	6.05723	5.48844	0.254824	0.369976	0.234101	0.900063	0	0.225921	0.483425	0.169677	0.978924	0.957339	0.177255	0.376128	0.328015	0.476819	0.262051	0.526691	0.187091	1.04331	0.387678	0.173973	1.08437	0.4767	0.193393	0.242478	0.202533	0.45665	0.497867	0.488709	1.07738	0.296678	0.383357	0.531292	0.311589	0.493092	0.188933	0.226512	0.740137	1.03666	1.05883	0.227375	1.05739	0.592588	1.07287	0.213978
Џ15 Fe3+	-0.28539	-0.173699	-0.174228	0.118537	-0.167707	-3.07845	-2.10041	-3.25439	-2.57162	-3.76645	-3.56055	-3.1853	-2.74025	-2.4747	-2.47051	-1.70364	-1.74932	-2.18413	-3.34121	-3.09809	-3.18528	-3.20599	-2.40535	-3.19316	-3.10207	-2.39688	-3.3298	-2.79954	-3.4976	-2.93121	-2.96653	-2.77175	-2.55258	-2.39231	-2.96431	-2.82659	-3.33165	-2.58777	-2.42748	-3.01073	-3.04956	-2.72928	-2.3972	-2.38317	-3.12247	-2.41593	-2.96723	-2.343	-2.93514
Џ15 Fe3+ = 0 if Fe3+ < 0	0	0	0	0.118537	0	0	0	0	0	0	0	0	0	0	0	0	0	0	0	0	0	0	0	0	0	0	0	0	0	0	0	0	0	0	0	0	0	0	0	0	0	0	0	0	0	0	0	0	0
Џ13 Fe3+ = total Fe2+ if Fe3+ > total Fe2+	0.0391402	2.1779	0.0544286	4.11866	0.481198	0.254824	0.285273	0.163143	0.316362	0	0.225921	0.239977	0.169677	0.323959	0.318536	0.177255	0.23796	0.265729	0.288341	0.262051	0.259511	0.187091	0.326218	0.269588	0.173973	0.320015	0.279207	0.193393	0.236547	0.202533	0.255946	0.269032	0.243509	0.323603	0.296678	0.201905	0.288138	0.225684	0.22548	0.188933	0.226512	0.314223	0.31834	0.321748	0.227375	0.318257	0.236644	0.328517	0.213978
Џ13 Fe2+ = total Fe2+ - Fe3+	0	0	0	0	0	0.0887488	0	0	0	0.153366	0.00690139	0	0.0669049	0	0	0.140712	0	0	0	0.0576278	0	0.00356976	0	0	0.0427392	0	0	0.0698315	0	0.036207	0	0	0	0	0.030985	0	0	0	0	0.0561225	0.0942082	0	0	0	0.00363115	0	0	0	0.0729658
Џ15 Fe3+ = total Fe2+ if Fe3+ > total Fe2+	0	0	0	0.118537	0	0	0	0	0	0	0	0	0	0	0	0	0	0	0	0	0	0	0	0	0	0	0	0	0	0	0	0	0	0	0	0	0	0	0	0	0	0	0	0	0	0	0	0	0
Џ15 Fe2+ = total Fe2+ - Fe3+	0.0450749	2.49981	0.0626617	4.61249	0.548382	0.368607	0.300717	0.175579	0.340714	0.165919	0.252082	0.259319	0.251603	0.34881	0.342778	0.331019	0.249045	0.280345	0.312524	0.343164	0.280695	0.204781	0.351243	0.290752	0.232205	0.344819	0.302553	0.280424	0.255882	0.255076	0.275184	0.288363	0.259781	0.348597	0.351042	0.216112	0.312617	0.240005	0.239951	0.262172	0.343674	0.33831	0.342652	0.34639	0.247912	0.342853	0.255196	0.353494	0.306679
Part 5a. Cations based on 23 O. Џ13 (Fe2+ - Fe3+)
Si	8.03496	7.66378	6.65161	7.94993	7.98909	8.05376	7.6606	7.88594	7.86154	8.10585	7.89478	7.89666	7.87697	7.84153	7.83909	7.57542	7.8177	7.81729	7.89469	7.88817	7.86296	7.85136	7.81689	7.82673	7.87036	7.80764	7.88615	7.87701	7.87252	7.87278	7.83472	7.82182	7.80805	7.80175	7.82607	7.90261	7.87349	7.82812	7.81239	7.87327	7.82705	7.8064	7.79145	7.79442	7.86764	7.79025	7.84702	7.79399	7.80704
Ti	0	0	0.0204174	0	0	0.00619426	0.0248785	0.0228504	0.0072557	0.0171089	0.0166187	0.0146121	0.0197952	0.00518673	0.00518785	0.0339116	0.00726235	0.0186769	0.0262062	0.0220028	0.0208955	0.0260708	0.00311651	0.0187171	0.0219725	0.00622784	0.0241177	0.0261845	0.0164473	0.0157051	0.0250243	0.00520481	0.0103931	0.00519238	0.0237273	0.0242066	0.0209753	0.018769	0.0208126	0.027272	0.0198972	0.00520376	0.00623255	0.00623604	0.032528	0.00415587	0.0177943	0.00519825	0.0182071
Al	0.0631324	0.757001	2.38495	0.00740684	0.0579225	0.200581	0.299616	0.0569599	0.168906	0.0351845	0.0390914	0.0343427	0.122433	0.157662	0.152819	0.474958	0.186942	0.225984	0.0344917	0.0820843	0.0605696	0.0456879	0.161144	0.0693972	0.0721348	0.16101	0.0361462	0.0886194	0.0375979	0.070542	0.127431	0.182677	0.174246	0.162715	0.0832858	0.084102	0.0377953	0.130704	0.114137	0.0723148	0.0747053	0.181009	0.187173	0.159593	0.0575432	0.170932	0.0377217	0.154754	0.0924551
Cr	0	0	0	0	0	0.103088	0.0835959	0.00873387	0.0991445	0.022479	0.0423768	0.0274265	0.0317577	0.0839576	0.0730698	0.101206	0.0545249	0.0610754	0.0286473	0.0286338	0.0472211	0.0130053	0.0917218	0.0390301	0.0208959	0.0861905	0.029759	0.00220181	0.0259373	0.00990459	0.0745256	0.0798737	0.0578987	0.0895068	0.00196058	0.00221249	0.0275591	0.0383604	0.0503152	0.0165379	0.0178449	0.109394	0.104817	0.0895813	0.0165437	0.102654	0.0264052	0.0874225	0.0107622
Fe3+	0.0447969	2.4904	0.0624253	4.74325	0.54639	0.256243	0.287586	0.163978	0.322675	0	0.227036	0.242525	0.170305	0.331003	0.325307	0.177941	0.239921	0.267637	0.291361	0.263552	0.262517	0.187855	0.333789	0.271879	0.174634	0.327741	0.282131	0.19421	0.237801	0.203429	0.258513	0.271975	0.246124	0.331364	0.298604	0.203602	0.291505	0.227223	0.227923	0.189713	0.227633	0.319362	0.32568	0.329328	0.228504	0.325745	0.239732	0.336362	0.214978
Fe2+	0	0	0	0	0	0.0892432	0	0	0	0.153362	0.00693545	0	0.0671526	0	0	0.141256	0	0	0	0.0579579	0	0.00358434	0	0	0.0429015	0	0	0.0701263	0	0.0363671	0	0	0	0	0.0311861	0	0	0	0	0.056354	0.0946744	0	0	0	0.00364919	0	0	0	0.0733068
Mn	0.0680565	0.0370929	0	0.771838	2.03481	0.00930003	0.0051762	0	0.00933743	0.00120409	0.00245364	0.00352583	0.00234634	0.00934479	0.00934681	0.00516455	0.00584124	0.00584196	0.00354113	0.0058991	0.00352939	0.000904556	0.00935823	0.00565862	0.00235639	0.0105193	0.00236154	0.0035382	0.00134394	0.00353692	0.00352231	0.00468869	0.00234063	0.0105243	0.00404818	0.00118512	0.00354288	0.00352247	0.00468718	0.00354341	0.00423914	0.00585968	0.00935753	0.00819241	0.0023631	0.00935941	0.00353598	0.00819486	0.00313161
Mg	6.66787	3.9171	5.79055	1.499	4.133	4.354	4.74395	4.92804	4.79059	4.66445	4.83487	4.91898	4.75737	4.85399	4.87149	4.54043	4.79498	4.69686	4.85723	4.72618	4.89288	4.92462	4.88567	4.87908	4.8441	4.91452	4.87546	4.793	4.87724	4.84523	4.80662	4.77601	4.84054	4.91073	4.81551	4.89133	4.89704	4.84195	4.9106	4.81461	4.79829	4.78536	4.87501	4.91893	4.8558	4.90276	4.99745	4.92452	4.84087
Ni	0	0	0	0	0	0	0	0	0	0	0	0	0	0	0	0	0	0	0	0	0	0	0	0	0	0	0	0	0	0	0	0	0	0	0	0	0	0	0	0	0	0	0	0	0	0	0	0	0
Zn	0	0	0	0	0	0	0	0	0	0	0	0	0	0	0	0	0	0	0	0	0	0	0	0	0	0	0	0	0	0	0	0	0	0	0	0	0	0	0	0	0	0	0	0	0	0	0	0	0
Li	0	0	0	0	0	0	0	0	0	0	0	0	0	0	0	0	0	0	0	0	0	0	0	0	0	0	0	0	0	0	0	0	0	0	0	0	0	0	0	0	0	0	0	0	0	0	0	0	0
Ca	0.0286959	0.0782008	0.0334447	0.0673334	0.184295	0.986708	1.23959	0.942407	0.946384	0.865122	0.858201	0.890511	1.10855	0.951563	0.959158	1.41402	1.34329	1.2267	0.848089	0.979019	0.878016	0.969595	0.952931	0.915849	1.00301	0.943268	0.851357	1.08459	0.871181	1.04394	0.960911	1.00529	1.0718	0.946683	1.00751	1.02239	0.835062	1.11245	1.10725	1.02493	1.00307	0.947276	0.957298	0.954872	0.981948	0.945651	0.921401	0.962562	1.03954
Na	0.0519302	0.0283036	0.384196	0.0152314	0.0728684	1.38113	1.46193	1.61977	1.52294	1.60418	1.9121	1.68148	1.43677	1.54019	1.55657	1.1999	1.05634	1.28649	1.65365	1.57455	1.72358	1.6267	1.53973	1.89269	1.5562	1.5545	1.63528	1.32291	1.94133	1.47626	1.65024	1.61532	1.56187	1.56061	1.55124	1.38087	1.70043	1.42722	1.46996	1.40326	1.63865	1.67134	1.53693	1.56726	1.44703	1.56938	1.58919	1.55701	1.65739
K	0	0	0	0	0	0.0770406	0.0939098	0.479147	0.0597708	0.36271	0.338898	0.377045	0.302156	0.0562992	0.0580711	0.0766633	0.151324	0.114387	0.472907	0.387387	0.343758	0.514372	0.058142	0.255296	0.461385	0.0563333	0.503297	0.500936	0.337064	0.463466	0.245807	0.173017	0.146303	0.0563606	0.480126	0.415901	0.471361	0.307714	0.202966	0.549707	0.440095	0.095317	0.0616612	0.0599329	0.585491	0.0651978	0.434938	0.0564243	0.388308
Ba	0	0	0	0	0	0	0	0	0	0	0	0	0	0	0	0	0	0	0	0	0	0	0	0	0	0	0	0	0	0	0	0	0	0	0	0	0	0	0	0	0	0	0	0	0	0	0	0	0
Sr	0	0	0	0	0	0	0	0	0	0	0	0	0	0	0	0	0	0	0	0	0	0	0	0	0	0	0	0	0	0	0	0	0	0	0	0	0	0	0	0	0	0	0	0	0	0	0	0	0
Pb	0	0	0	0	0	0	0	0	0	0	0	0	0	0	0	0	0	0	0	0	0	0	0	0	0	0	0	0	0	0	0	0	0	0	0	0	0	0	0	0	0	0	0	0	0	0	0	0	0
F	0	0	0	0	0	0	0	0	0	0	0	0	0	0	0	0	0	0	0	0	0	0	0	0	0	0	0	0	0	0	0	0	0	0	0	0	0	0	0	0	0	0	0	0	0	0	0	0	0
Cl	0	0	0	0	0	0	0	0	0	0	0	0	0	0	0	0	0	0	0	0	0	0	0	0	0	0	0	0	0	0	0	0	0	0	0	0	0	0	0	0	0	0	0	0	0	0	0	0	0
Total	14.9594	14.9719	15.3276	15.054	15.0184	15.5173	15.9008	16.1078	15.7885	15.8316	16.1734	16.0871	15.8956	15.8307	15.8501	15.7409	15.6581	15.7209	16.1108	16.0154	16.0959	16.1638	15.8525	16.1743	16.0699	15.868	16.1261	15.9633	16.2185	16.0412	15.9873	15.9359	15.9196	15.8754	16.1233	15.9284	16.1588	15.936	15.921	16.0315	16.1462	15.9265	15.8556	15.8884	16.079	15.8861	16.1152	15.8864	16.146
Part 5b. Cations based on 23 O. Џ15 (Fe2+ - Fe3+)
Si	8.03496	7.66378	6.65161	7.94993	7.98909	8.05376	7.6606	7.88594	7.86154	8.10585	7.89478	7.89666	7.87697	7.84153	7.83909	7.57542	7.8177	7.81729	7.89469	7.88817	7.86296	7.85136	7.81689	7.82673	7.87036	7.80764	7.88615	7.87701	7.87252	7.87278	7.83472	7.82182	7.80805	7.80175	7.82607	7.90261	7.87349	7.82812	7.81239	7.87327	7.82705	7.8064	7.79145	7.79442	7.86764	7.79025	7.84702	7.79399	7.80704
Ti	0	0	0.0204174	0	0	0.00619426	0.0248785	0.0228504	0.0072557	0.0171089	0.0166187	0.0146121	0.0197952	0.00518673	0.00518785	0.0339116	0.00726235	0.0186769	0.0262062	0.0220028	0.0208955	0.0260708	0.00311651	0.0187171	0.0219725	0.00622784	0.0241177	0.0261845	0.0164473	0.0157051	0.0250243	0.00520481	0.0103931	0.00519238	0.0237273	0.0242066	0.0209753	0.018769	0.0208126	0.027272	0.0198972	0.00520376	0.00623255	0.00623604	0.032528	0.00415587	0.0177943	0.00519825	0.0182071
Al	0.0631324	0.757001	2.38495	0.00740684	0.0579225	0.200581	0.299616	0.0569599	0.168906	0.0351845	0.0390914	0.0343427	0.122433	0.157662	0.152819	0.474958	0.186942	0.225984	0.0344917	0.0820843	0.0605696	0.0456879	0.161144	0.0693972	0.0721348	0.16101	0.0361462	0.0886194	0.0375979	0.070542	0.127431	0.182677	0.174246	0.162715	0.0832858	0.084102	0.0377953	0.130704	0.114137	0.0723148	0.0747053	0.181009	0.187173	0.159593	0.0575432	0.170932	0.0377217	0.154754	0.0924551
Cr	0	0	0	0	0	0.103088	0.0835959	0.00873387	0.0991445	0.022479	0.0423768	0.0274265	0.0317577	0.0839576	0.0730698	0.101206	0.0545249	0.0610754	0.0286473	0.0286338	0.0472211	0.0130053	0.0917218	0.0390301	0.0208959	0.0861905	0.029759	0.00220181	0.0259373	0.00990459	0.0745256	0.0798737	0.0578987	0.0895068	0.00196058	0.00221249	0.0275591	0.0383604	0.0503152	0.0165379	0.0178449	0.109394	0.104817	0.0895813	0.0165437	0.102654	0.0264052	0.0874225	0.0107622
Fe3+	0	0	0	0.118843	0	0	0	0	0	0	0	0	0	0	0	0	0	0	0	0	0	0	0	0	0	0	0	0	0	0	0	0	0	0	0	0	0	0	0	0	0	0	0	0	0	0	0	0	0
Fe2+	0.0447969	2.4904	0.0624253	4.62441	0.54639	0.345487	0.287586	0.163978	0.322675	0.153362	0.233972	0.242525	0.237457	0.331003	0.325307	0.319197	0.239921	0.267637	0.291361	0.32151	0.262517	0.191439	0.333789	0.271879	0.217535	0.327741	0.282131	0.264336	0.237801	0.239796	0.258513	0.271975	0.246124	0.331364	0.32979	0.203602	0.291505	0.227223	0.227923	0.246067	0.322307	0.319362	0.32568	0.329328	0.232153	0.325745	0.239732	0.336362	0.288284
Mn	0.0680565	0.0370929	0	0.771838	2.03481	0.00930003	0.0051762	0	0.00933743	0.00120409	0.00245364	0.00352583	0.00234634	0.00934479	0.00934681	0.00516455	0.00584124	0.00584196	0.00354113	0.0058991	0.00352939	0.000904556	0.00935823	0.00565862	0.00235639	0.0105193	0.00236154	0.0035382	0.00134394	0.00353692	0.00352231	0.00468869	0.00234063	0.0105243	0.00404818	0.00118512	0.00354288	0.00352247	0.00468718	0.00354341	0.00423914	0.00585968	0.00935753	0.00819241	0.0023631	0.00935941	0.00353598	0.00819486	0.00313161
Mg	6.66787	3.9171	5.79055	1.499	4.133	4.354	4.74395	4.92804	4.79059	4.66445	4.83487	4.91898	4.75737	4.85399	4.87149	4.54043	4.79498	4.69686	4.85723	4.72618	4.89288	4.92462	4.88567	4.87908	4.8441	4.91452	4.87546	4.793	4.87724	4.84523	4.80662	4.77601	4.84054	4.91073	4.81551	4.89133	4.89704	4.84195	4.9106	4.81461	4.79829	4.78536	4.87501	4.91893	4.8558	4.90276	4.99745	4.92452	4.84087
Ni	0	0	0	0	0	0	0	0	0	0	0	0	0	0	0	0	0	0	0	0	0	0	0	0	0	0	0	0	0	0	0	0	0	0	0	0	0	0	0	0	0	0	0	0	0	0	0	0	0
Zn	0	0	0	0	0	0	0	0	0	0	0	0	0	0	0	0	0	0	0	0	0	0	0	0	0	0	0	0	0	0	0	0	0	0	0	0	0	0	0	0	0	0	0	0	0	0	0	0	0
Li	0	0	0	0	0	0	0	0	0	0	0	0	0	0	0	0	0	0	0	0	0	0	0	0	0	0	0	0	0	0	0	0	0	0	0	0	0	0	0	0	0	0	0	0	0	0	0	0	0
Ca	0.0286959	0.0782008	0.0334447	0.0673334	0.184295	0.986708	1.23959	0.942407	0.946384	0.865122	0.858201	0.890511	1.10855	0.951563	0.959158	1.41402	1.34329	1.2267	0.848089	0.979019	0.878016	0.969595	0.952931	0.915849	1.00301	0.943268	0.851357	1.08459	0.871181	1.04394	0.960911	1.00529	1.0718	0.946683	1.00751	1.02239	0.835062	1.11245	1.10725	1.02493	1.00307	0.947276	0.957298	0.954872	0.981948	0.945651	0.921401	0.962562	1.03954
Na	0.0519302	0.0283036	0.384196	0.0152314	0.0728684	1.38113	1.46193	1.61977	1.52294	1.60418	1.9121	1.68148	1.43677	1.54019	1.55657	1.1999	1.05634	1.28649	1.65365	1.57455	1.72358	1.6267	1.53973	1.89269	1.5562	1.5545	1.63528	1.32291	1.94133	1.47626	1.65024	1.61532	1.56187	1.56061	1.55124	1.38087	1.70043	1.42722	1.46996	1.40326	1.63865	1.67134	1.53693	1.56726	1.44703	1.56938	1.58919	1.55701	1.65739
K	0	0	0	0	0	0.0770406	0.0939098	0.479147	0.0597708	0.36271	0.338898	0.377045	0.302156	0.0562992	0.0580711	0.0766633	0.151324	0.114387	0.472907	0.387387	0.343758	0.514372	0.058142	0.255296	0.461385	0.0563333	0.503297	0.500936	0.337064	0.463466	0.245807	0.173017	0.146303	0.0563606	0.480126	0.415901	0.471361	0.307714	0.202966	0.549707	0.440095	0.095317	0.0616612	0.0599329	0.585491	0.0651978	0.434938	0.0564243	0.388308
Ba	0	0	0	0	0	0	0	0	0	0	0	0	0	0	0	0	0	0	0	0	0	0	0	0	0	0	0	0	0	0	0	0	0	0	0	0	0	0	0	0	0	0	0	0	0	0	0	0	0
Sr	0	0	0	0	0	0	0	0	0	0	0	0	0	0	0	0	0	0	0	0	0	0	0	0	0	0	0	0	0	0	0	0	0	0	0	0	0	0	0	0	0	0	0	0	0	0	0	0	0
Pb	0	0	0	0	0	0	0	0	0	0	0	0	0	0	0	0	0	0	0	0	0	0	0	0	0	0	0	0	0	0	0	0	0	0	0	0	0	0	0	0	0	0	0	0	0	0	0	0	0
F	0	0	0	0	0	0	0	0	0	0	0	0	0	0	0	0	0	0	0	0	0	0	0	0	0	0	0	0	0	0	0	0	0	0	0	0	0	0	0	0	0	0	0	0	0	0	0	0	0
Cl	0	0	0	0	0	0	0	0	0	0	0	0	0	0	0	0	0	0	0	0	0	0	0	0	0	0	0	0	0	0	0	0	0	0	0	0	0	0	0	0	0	0	0	0	0	0	0	0	0
Total	14.9594	14.9719	15.3276	15.054	15.0184	15.5173	15.9008	16.1078	15.7885	15.8316	16.1734	16.0871	15.8956	15.8307	15.8501	15.7409	15.6581	15.7209	16.1108	16.0154	16.0959	16.1638	15.8525	16.1743	16.0699	15.868	16.1261	15.9633	16.2185	16.0412	15.9873	15.9359	15.9196	15.8754	16.1233	15.9284	16.1588	15.936	15.921	16.0315	16.1462	15.9265	15.8556	15.8884	16.079	15.8861	16.1152	15.8864	16.146
Part 6a. Intermediate 23 O - recheck sum anions Џ13
Si	16.0699	15.3276	13.3032	15.8999	15.9782	16.1075	15.3212	15.7719	15.7231	16.2117	15.7896	15.7933	15.7539	15.6831	15.6782	15.1508	15.6354	15.6346	15.7894	15.7763	15.7259	15.7027	15.6338	15.6535	15.7407	15.6153	15.7723	15.754	15.745	15.7456	15.6694	15.6436	15.6161	15.6035	15.6521	15.8052	15.747	15.6562	15.6248	15.7465	15.6541	15.6128	15.5829	15.5888	15.7353	15.5805	15.694	15.588	15.6141
Ti	0	0	0.0408349	0	0	0.0123885	0.049757	0.0457008	0.0145114	0.0342177	0.0332374	0.0292242	0.0395903	0.0103735	0.0103757	0.0678232	0.0145247	0.0373538	0.0524125	0.0440057	0.0417909	0.0521416	0.00623302	0.0374342	0.0439451	0.0124557	0.0482355	0.052369	0.0328946	0.0314101	0.0500486	0.0104096	0.0207863	0.0103848	0.0474545	0.0484131	0.0419507	0.0375381	0.0416251	0.054544	0.0397945	0.0104075	0.0124651	0.0124721	0.0650559	0.00831174	0.0355886	0.0103965	0.0364143
Al	0.0946987	1.1355	3.57743	0.0111103	0.0868837	0.300872	0.449425	0.0854399	0.253359	0.0527767	0.0586372	0.051514	0.183649	0.236492	0.229228	0.712437	0.280413	0.338976	0.0517376	0.123126	0.0908544	0.0685318	0.241716	0.104096	0.108202	0.241515	0.0542192	0.132929	0.0563969	0.105813	0.191147	0.274015	0.261368	0.244072	0.124929	0.126153	0.0566929	0.196057	0.171205	0.108472	0.112058	0.271514	0.28076	0.23939	0.0863148	0.256397	0.0565825	0.232131	0.138683
Cr	0	0	0	0	0	0.154632	0.125394	0.0131008	0.148717	0.0337185	0.0635652	0.0411397	0.0476366	0.125936	0.109605	0.151809	0.0817873	0.0916131	0.042971	0.0429506	0.0708317	0.0195079	0.137583	0.0585451	0.0313438	0.129286	0.0446385	0.00330272	0.0389059	0.0148569	0.111788	0.119811	0.086848	0.13426	0.00294086	0.00331873	0.0413386	0.0575406	0.0754728	0.0248069	0.0267674	0.164091	0.157226	0.134372	0.0248155	0.153981	0.0396078	0.131134	0.0161432
Fe3+	0.0671954	3.7356	0.0936379	7.11487	0.819584	0.384365	0.431378	0.245967	0.484013	0	0.340554	0.363788	0.255457	0.496504	0.48796	0.266911	0.359882	0.401456	0.437041	0.395328	0.393775	0.281782	0.500683	0.407818	0.26195	0.491612	0.423196	0.291315	0.356701	0.305143	0.387769	0.407963	0.369185	0.497045	0.447906	0.305402	0.437257	0.340834	0.341885	0.284569	0.341449	0.479043	0.488519	0.493992	0.342756	0.488617	0.359598	0.504543	0.322466
Fe2+	0	0	0	0	0	0.0892432	0	0	0	0.153362	0.00693545	0	0.0671526	0	0	0.141256	0	0	0	0.0579579	0	0.00358434	0	0	0.0429015	0	0	0.0701263	0	0.0363671	0	0	0	0	0.0311861	0	0	0	0	0.056354	0.0946744	0	0	0	0.00364919	0	0	0	0.0733068
Mn	0.0680565	0.0370929	0	0.771838	2.03481	0.00930003	0.0051762	0	0.00933743	0.00120409	0.00245364	0.00352583	0.00234634	0.00934479	0.00934681	0.00516455	0.00584124	0.00584196	0.00354113	0.0058991	0.00352939	0.000904556	0.00935823	0.00565862	0.00235639	0.0105193	0.00236154	0.0035382	0.00134394	0.00353692	0.00352231	0.00468869	0.00234063	0.0105243	0.00404818	0.00118512	0.00354288	0.00352247	0.00468718	0.00354341	0.00423914	0.00585968	0.00935753	0.00819241	0.0023631	0.00935941	0.00353598	0.00819486	0.00313161
Mg	6.66787	3.9171	5.79055	1.499	4.133	4.354	4.74395	4.92804	4.79059	4.66445	4.83487	4.91898	4.75737	4.85399	4.87149	4.54043	4.79498	4.69686	4.85723	4.72618	4.89288	4.92462	4.88567	4.87908	4.8441	4.91452	4.87546	4.793	4.87724	4.84523	4.80662	4.77601	4.84054	4.91073	4.81551	4.89133	4.89704	4.84195	4.9106	4.81461	4.79829	4.78536	4.87501	4.91893	4.8558	4.90276	4.99745	4.92452	4.84087
Ni	0	0	0	0	0	0	0	0	0	0	0	0	0	0	0	0	0	0	0	0	0	0	0	0	0	0	0	0	0	0	0	0	0	0	0	0	0	0	0	0	0	0	0	0	0	0	0	0	0
Zn	0	0	0	0	0	0	0	0	0	0	0	0	0	0	0	0	0	0	0	0	0	0	0	0	0	0	0	0	0	0	0	0	0	0	0	0	0	0	0	0	0	0	0	0	0	0	0	0	0
Li	0	0	0	0	0	0	0	0	0	0	0	0	0	0	0	0	0	0	0	0	0	0	0	0	0	0	0	0	0	0	0	0	0	0	0	0	0	0	0	0	0	0	0	0	0	0	0	0	0
Ca	0.0286959	0.0782008	0.0334447	0.0673334	0.184295	0.986708	1.23959	0.942407	0.946384	0.865122	0.858201	0.890511	1.10855	0.951563	0.959158	1.41402	1.34329	1.2267	0.848089	0.979019	0.878016	0.969595	0.952931	0.915849	1.00301	0.943268	0.851357	1.08459	0.871181	1.04394	0.960911	1.00529	1.0718	0.946683	1.00751	1.02239	0.835062	1.11245	1.10725	1.02493	1.00307	0.947276	0.957298	0.954872	0.981948	0.945651	0.921401	0.962562	1.03954
Na	0.0259651	0.0141518	0.192098	0.00761571	0.0364342	0.690564	0.730965	0.809887	0.761472	0.802088	0.956051	0.840741	0.718385	0.770095	0.778285	0.599952	0.528171	0.643244	0.826826	0.787274	0.861788	0.81335	0.769863	0.946346	0.778099	0.77725	0.81764	0.661453	0.970664	0.738131	0.82512	0.807662	0.780933	0.780303	0.775622	0.690433	0.850213	0.713612	0.734978	0.701632	0.819327	0.835668	0.768466	0.783631	0.723514	0.784689	0.794595	0.778505	0.828695
K	0	0	0	0	0	0.0385203	0.0469549	0.239573	0.0298854	0.181355	0.169449	0.188522	0.151078	0.0281496	0.0290356	0.0383316	0.0756618	0.0571933	0.236453	0.193693	0.171879	0.257186	0.029071	0.127648	0.230693	0.0281667	0.251648	0.250468	0.168532	0.231733	0.122904	0.0865087	0.0731517	0.0281803	0.240063	0.207951	0.235681	0.153857	0.101483	0.274853	0.220047	0.0476585	0.0308306	0.0299665	0.292745	0.0325989	0.217469	0.0282122	0.194154
Ba	0	0	0	0	0	0	0	0	0	0	0	0	0	0	0	0	0	0	0	0	0	0	0	0	0	0	0	0	0	0	0	0	0	0	0	0	0	0	0	0	0	0	0	0	0	0	0	0	0
Sr	0	0	0	0	0	0	0	0	0	0	0	0	0	0	0	0	0	0	0	0	0	0	0	0	0	0	0	0	0	0	0	0	0	0	0	0	0	0	0	0	0	0	0	0	0	0	0	0	0
Pb	0	0	0	0	0	0	0	0	0	0	0	0	0	0	0	0	0	0	0	0	0	0	0	0	0	0	0	0	0	0	0	0	0	0	0	0	0	0	0	0	0	0	0	0	0	0	0	0	0
F	0	0	0	0	0	0	0	0	0	0	0	0	0	0	0	0	0	0	0	0	0	0	0	0	0	0	0	0	0	0	0	0	0	0	0	0	0	0	0	0	0	0	0	0	0	0	0	0	0
Cl	0	0	0	0	0	0	0	0	0	0	0	0	0	0	0	0	0	0	0	0	0	0	0	0	0	0	0	0	0	0	0	0	0	0	0	0	0	0	0	0	0	0	0	0	0	0	0	0	0
Total exc. F, Cl	23.0224	24.2452	23.0312	25.3716	23.2732	23.1281	23.1438	23.082	23.1613	23	23.1135	23.1213	23.0852	23.1655	23.1627	23.089	23.12	23.1338	23.1457	23.1318	23.1313	23.0939	23.1669	23.1359	23.0873	23.1639	23.1411	23.0971	23.1189	23.1017	23.1293	23.136	23.1231	23.1657	23.1493	23.1018	23.1458	23.1136	23.114	23.0949	23.1138	23.1597	23.1628	23.1647	23.1143	23.1629	23.1199	23.1682	23.1075
adjustment factor	0.999027	0.948641	0.998645	0.906525	0.988261	0.99446	0.993787	0.996448	0.993034	1	0.995089	0.994755	0.996311	0.992856	0.992978	0.996147	0.994811	0.994215	0.993706	0.994303	0.994325	0.995933	0.992796	0.994124	0.996218	0.992926	0.993904	0.995796	0.994857	0.995597	0.994412	0.994122	0.994678	0.992848	0.99355	0.995593	0.993703	0.995085	0.99507	0.995893	0.995076	0.993105	0.99297	0.992892	0.995057	0.992968	0.994815	0.992741	0.995348
Part 6b. Intermediate 23 O - recheck sum anions Џ15
Si	16.0699	15.3276	13.3032	15.8999	15.9782	16.1075	15.3212	15.7719	15.7231	16.2117	15.7896	15.7933	15.7539	15.6831	15.6782	15.1508	15.6354	15.6346	15.7894	15.7763	15.7259	15.7027	15.6338	15.6535	15.7407	15.6153	15.7723	15.754	15.745	15.7456	15.6694	15.6436	15.6161	15.6035	15.6521	15.8052	15.747	15.6562	15.6248	15.7465	15.6541	15.6128	15.5829	15.5888	15.7353	15.5805	15.694	15.588	15.6141
Ti	0	0	0.0408349	0	0	0.0123885	0.049757	0.0457008	0.0145114	0.0342177	0.0332374	0.0292242	0.0395903	0.0103735	0.0103757	0.0678232	0.0145247	0.0373538	0.0524125	0.0440057	0.0417909	0.0521416	0.00623302	0.0374342	0.0439451	0.0124557	0.0482355	0.052369	0.0328946	0.0314101	0.0500486	0.0104096	0.0207863	0.0103848	0.0474545	0.0484131	0.0419507	0.0375381	0.0416251	0.054544	0.0397945	0.0104075	0.0124651	0.0124721	0.0650559	0.00831174	0.0355886	0.0103965	0.0364143
Al	0.0946987	1.1355	3.57743	0.0111103	0.0868837	0.300872	0.449425	0.0854399	0.253359	0.0527767	0.0586372	0.051514	0.183649	0.236492	0.229228	0.712437	0.280413	0.338976	0.0517376	0.123126	0.0908544	0.0685318	0.241716	0.104096	0.108202	0.241515	0.0542192	0.132929	0.0563969	0.105813	0.191147	0.274015	0.261368	0.244072	0.124929	0.126153	0.0566929	0.196057	0.171205	0.108472	0.112058	0.271514	0.28076	0.23939	0.0863148	0.256397	0.0565825	0.232131	0.138683
Cr	0	0	0	0	0	0.154632	0.125394	0.0131008	0.148717	0.0337185	0.0635652	0.0411397	0.0476366	0.125936	0.109605	0.151809	0.0817873	0.0916131	0.042971	0.0429506	0.0708317	0.0195079	0.137583	0.0585451	0.0313438	0.129286	0.0446385	0.00330272	0.0389059	0.0148569	0.111788	0.119811	0.086848	0.13426	0.00294086	0.00331873	0.0413386	0.0575406	0.0754728	0.0248069	0.0267674	0.164091	0.157226	0.134372	0.0248155	0.153981	0.0396078	0.131134	0.0161432
Fe3+	0	0	0	0.178264	0	0	0	0	0	0	0	0	0	0	0	0	0	0	0	0	0	0	0	0	0	0	0	0	0	0	0	0	0	0	0	0	0	0	0	0	0	0	0	0	0	0	0	0	0
Fe2+	0.0447969	2.4904	0.0624253	4.62441	0.54639	0.345487	0.287586	0.163978	0.322675	0.153362	0.233972	0.242525	0.237457	0.331003	0.325307	0.319197	0.239921	0.267637	0.291361	0.32151	0.262517	0.191439	0.333789	0.271879	0.217535	0.327741	0.282131	0.264336	0.237801	0.239796	0.258513	0.271975	0.246124	0.331364	0.32979	0.203602	0.291505	0.227223	0.227923	0.246067	0.322307	0.319362	0.32568	0.329328	0.232153	0.325745	0.239732	0.336362	0.288284
Mn	0.0680565	0.0370929	0	0.771838	2.03481	0.00930003	0.0051762	0	0.00933743	0.00120409	0.00245364	0.00352583	0.00234634	0.00934479	0.00934681	0.00516455	0.00584124	0.00584196	0.00354113	0.0058991	0.00352939	0.000904556	0.00935823	0.00565862	0.00235639	0.0105193	0.00236154	0.0035382	0.00134394	0.00353692	0.00352231	0.00468869	0.00234063	0.0105243	0.00404818	0.00118512	0.00354288	0.00352247	0.00468718	0.00354341	0.00423914	0.00585968	0.00935753	0.00819241	0.0023631	0.00935941	0.00353598	0.00819486	0.00313161
Mg	6.66787	3.9171	5.79055	1.499	4.133	4.354	4.74395	4.92804	4.79059	4.66445	4.83487	4.91898	4.75737	4.85399	4.87149	4.54043	4.79498	4.69686	4.85723	4.72618	4.89288	4.92462	4.88567	4.87908	4.8441	4.91452	4.87546	4.793	4.87724	4.84523	4.80662	4.77601	4.84054	4.91073	4.81551	4.89133	4.89704	4.84195	4.9106	4.81461	4.79829	4.78536	4.87501	4.91893	4.8558	4.90276	4.99745	4.92452	4.84087
Ni	0	0	0	0	0	0	0	0	0	0	0	0	0	0	0	0	0	0	0	0	0	0	0	0	0	0	0	0	0	0	0	0	0	0	0	0	0	0	0	0	0	0	0	0	0	0	0	0	0
Zn	0	0	0	0	0	0	0	0	0	0	0	0	0	0	0	0	0	0	0	0	0	0	0	0	0	0	0	0	0	0	0	0	0	0	0	0	0	0	0	0	0	0	0	0	0	0	0	0	0
Li	0	0	0	0	0	0	0	0	0	0	0	0	0	0	0	0	0	0	0	0	0	0	0	0	0	0	0	0	0	0	0	0	0	0	0	0	0	0	0	0	0	0	0	0	0	0	0	0	0
Ca	0.0286959	0.0782008	0.0334447	0.0673334	0.184295	0.986708	1.23959	0.942407	0.946384	0.865122	0.858201	0.890511	1.10855	0.951563	0.959158	1.41402	1.34329	1.2267	0.848089	0.979019	0.878016	0.969595	0.952931	0.915849	1.00301	0.943268	0.851357	1.08459	0.871181	1.04394	0.960911	1.00529	1.0718	0.946683	1.00751	1.02239	0.835062	1.11245	1.10725	1.02493	1.00307	0.947276	0.957298	0.954872	0.981948	0.945651	0.921401	0.962562	1.03954
Na	0.0259651	0.0141518	0.192098	0.00761571	0.0364342	0.690564	0.730965	0.809887	0.761472	0.802088	0.956051	0.840741	0.718385	0.770095	0.778285	0.599952	0.528171	0.643244	0.826826	0.787274	0.861788	0.81335	0.769863	0.946346	0.778099	0.77725	0.81764	0.661453	0.970664	0.738131	0.82512	0.807662	0.780933	0.780303	0.775622	0.690433	0.850213	0.713612	0.734978	0.701632	0.819327	0.835668	0.768466	0.783631	0.723514	0.784689	0.794595	0.778505	0.828695
K	0	0	0	0	0	0.0385203	0.0469549	0.239573	0.0298854	0.181355	0.169449	0.188522	0.151078	0.0281496	0.0290356	0.0383316	0.0756618	0.0571933	0.236453	0.193693	0.171879	0.257186	0.029071	0.127648	0.230693	0.0281667	0.251648	0.250468	0.168532	0.231733	0.122904	0.0865087	0.0731517	0.0281803	0.240063	0.207951	0.235681	0.153857	0.101483	0.274853	0.220047	0.0476585	0.0308306	0.0299665	0.292745	0.0325989	0.217469	0.0282122	0.194154
Ba	0	0	0	0	0	0	0	0	0	0	0	0	0	0	0	0	0	0	0	0	0	0	0	0	0	0	0	0	0	0	0	0	0	0	0	0	0	0	0	0	0	0	0	0	0	0	0	0	0
Sr	0	0	0	0	0	0	0	0	0	0	0	0	0	0	0	0	0	0	0	0	0	0	0	0	0	0	0	0	0	0	0	0	0	0	0	0	0	0	0	0	0	0	0	0	0	0	0	0	0
Pb	0	0	0	0	0	0	0	0	0	0	0	0	0	0	0	0	0	0	0	0	0	0	0	0	0	0	0	0	0	0	0	0	0	0	0	0	0	0	0	0	0	0	0	0	0	0	0	0	0
F	0	0	0	0	0	0	0	0	0	0	0	0	0	0	0	0	0	0	0	0	0	0	0	0	0	0	0	0	0	0	0	0	0	0	0	0	0	0	0	0	0	0	0	0	0	0	0	0	0
Cl	0	0	0	0	0	0	0	0	0	0	0	0	0	0	0	0	0	0	0	0	0	0	0	0	0	0	0	0	0	0	0	0	0	0	0	0	0	0	0	0	0	0	0	0	0	0	0	0	0
Total exc. F, Cl	23	23	23	23.0594	23	23	23	23	23	23	23	23	23	23	23	23	23	23	23	23	23	23	23	23	23	23	23	23	23	23	23	23	23	23	23	23	23	23	23	23	23	23	23	23	23	23	23	23	23
adjustment factor	1	1	1	0.997423	1	1	1	1	1	1	1	1	1	1	1	1	1	1	1	1	1	1	1	1	1	1	1	1	1	1	1	1	1	1	1	1	1	1	1	1	1	1	1	1	1	1	1	1	1
Part 7a. Formula based on 23 (O) inc. Fe2/Fe3 (Џ13)
Si	8.02714	7.27017	6.64259	7.2068	7.89531	8.00915	7.61301	7.85793	7.80677	8.10585	7.85601	7.85524	7.84791	7.78551	7.78404	7.54623	7.77714	7.77207	7.845	7.84323	7.81834	7.81943	7.76058	7.78075	7.84059	7.7524	7.83808	7.84389	7.83203	7.83812	7.79093	7.77584	7.7665	7.74595	7.77559	7.86779	7.82391	7.78965	7.77387	7.84093	7.78851	7.75258	7.73668	7.73902	7.82875	7.73548	7.80634	7.73741	7.77072
Ti	0	0	0.0203898	0	0	0.00615995	0.0247239	0.0227692	0.00720516	0.0171089	0.0165371	0.0145355	0.0197221	0.00514967	0.00515142	0.0337809	0.00722466	0.0185689	0.0260413	0.0218775	0.0207769	0.0259648	0.00309406	0.0186071	0.0218894	0.00618378	0.0239707	0.0260744	0.0163627	0.0156359	0.0248844	0.00517422	0.0103378	0.00515524	0.0235742	0.0240999	0.0208433	0.0186768	0.02071	0.02716	0.0197993	0.00516788	0.00618874	0.00619171	0.0323672	0.00412665	0.0177021	0.00516052	0.0181224
Al	0.063071	0.718122	2.38172	0.00671448	0.0572426	0.19947	0.297755	0.0567576	0.16773	0.0351845	0.0388994	0.0341626	0.121981	0.156535	0.151745	0.473128	0.185972	0.224677	0.0342746	0.0816167	0.0602259	0.0455021	0.159983	0.0689894	0.0718619	0.159871	0.0359258	0.0882469	0.0374046	0.0702314	0.126719	0.181603	0.173318	0.161551	0.0827486	0.0837314	0.0375573	0.130062	0.113574	0.0720178	0.0743374	0.179761	0.185857	0.158459	0.0572588	0.16973	0.0375261	0.153631	0.092025
Cr	0	0	0	0	0	0.102517	0.0830765	0.00870284	0.0984539	0.022479	0.0421687	0.0272826	0.0316406	0.0833578	0.0725567	0.100816	0.054242	0.0607221	0.028467	0.0284706	0.0469532	0.0129524	0.091061	0.0388008	0.0208168	0.0855807	0.0295776	0.00219256	0.0258039	0.00986098	0.0741091	0.0794042	0.0575906	0.0888667	0.00194793	0.00220274	0.0273855	0.0381719	0.0500672	0.01647	0.0177571	0.10864	0.10408	0.0889445	0.0164619	0.101932	0.0262683	0.0867879	0.0107121
Fe3+	0.0447534	2.3625	0.0623407	4.29987	0.539976	0.254824	0.285799	0.163396	0.320428	0	0.225921	0.241253	0.169677	0.328638	0.323022	0.177255	0.238676	0.266089	0.289527	0.262051	0.261027	0.187091	0.331384	0.270281	0.173973	0.325423	0.280411	0.193393	0.236578	0.202533	0.257068	0.270377	0.244814	0.328994	0.296678	0.202704	0.289669	0.226106	0.226799	0.188933	0.226512	0.31716	0.32339	0.326987	0.227375	0.323454	0.238489	0.33392	0.213978
Fe2+	0	0	0	0	0	0.0887488	0	0	0	0.153362	0.00690139	0	0.0669049	0	0	0.140712	0	0	0	0.0576278	0	0.00356976	0	0	0.0427392	0	0	0.0698315	0	0.036207	0	0	0	0	0.030985	0	0	0	0	0.0561225	0.0942082	0	0	0	0.00363115	0	0	0	0.0729658
Mn	0.0679902	0.0351878	0	0.69969	2.01093	0.00924851	0.00514404	0	0.00927239	0.00120409	0.00244159	0.00350734	0.00233769	0.00927803	0.00928118	0.00514465	0.00581093	0.00580817	0.00351884	0.00586549	0.00350936	0.000900877	0.00929081	0.00562537	0.00234748	0.0104448	0.00234714	0.00352332	0.00133703	0.00352135	0.00350263	0.00466113	0.00232818	0.0104491	0.00402207	0.0011799	0.00352057	0.00350515	0.00466407	0.00352885	0.00421827	0.00581928	0.00929174	0.00813417	0.00235142	0.00929359	0.00351765	0.00813537	0.00311704
Mg	6.66139	3.71592	5.78271	1.35888	4.08448	4.32988	4.71448	4.91053	4.75722	4.66445	4.81112	4.89318	4.73982	4.81931	4.83728	4.52294	4.7701	4.66969	4.82665	4.69926	4.86512	4.90459	4.85047	4.85041	4.82578	4.87976	4.84574	4.77285	4.85216	4.82389	4.77975	4.74793	4.81478	4.87561	4.78445	4.86978	4.8662	4.81816	4.88638	4.79484	4.77466	4.75236	4.84074	4.88397	4.8318	4.86828	4.97154	4.88878	4.81836
Ni	0	0	0	0	0	0	0	0	0	0	0	0	0	0	0	0	0	0	0	0	0	0	0	0	0	0	0	0	0	0	0	0	0	0	0	0	0	0	0	0	0	0	0	0	0	0	0	0	0
Zn	0	0	0	0	0	0	0	0	0	0	0	0	0	0	0	0	0	0	0	0	0	0	0	0	0	0	0	0	0	0	0	0	0	0	0	0	0	0	0	0	0	0	0	0	0	0	0	0	0
Li	0	0	0	0	0	0	0	0	0	0	0	0	0	0	0	0	0	0	0	0	0	0	0	0	0	0	0	0	0	0	0	0	0	0	0	0	0	0	0	0	0	0	0	0	0	0	0	0	0
Ca	0.028668	0.0741845	0.0333994	0.0610393	0.182131	0.981242	1.23189	0.939059	0.939792	0.865122	0.853986	0.88584	1.10446	0.944764	0.952423	1.40857	1.33632	1.21961	0.842751	0.973442	0.873033	0.965651	0.946066	0.910468	0.999214	0.936595	0.846167	1.08003	0.8667	1.03934	0.955541	0.999384	1.0661	0.939912	1.00101	1.01789	0.829804	1.10698	1.10179	1.02072	0.998134	0.940744	0.950568	0.948085	0.977095	0.939002	0.916624	0.955575	1.03471
Na	0.0518797	0.0268499	0.383675	0.0138077	0.072013	1.37348	1.45285	1.61402	1.51234	1.60418	1.90271	1.67266	1.43147	1.52919	1.54564	1.19528	1.05086	1.27905	1.64324	1.56558	1.71379	1.62008	1.52863	1.88157	1.55031	1.5435	1.62531	1.31734	1.93134	1.46976	1.64102	1.60583	1.55355	1.54944	1.54124	1.37478	1.68972	1.42021	1.46271	1.3975	1.63059	1.65981	1.52613	1.55612	1.43988	1.55834	1.58095	1.54571	1.64968
K	0	0	0	0	0	0.0766139	0.0933263	0.477445	0.0593545	0.36271	0.337233	0.375067	0.301041	0.055897	0.0576633	0.0763678	0.150538	0.113725	0.46993	0.38518	0.341807	0.51228	0.0577232	0.253796	0.45964	0.0559348	0.500229	0.49883	0.33533	0.461425	0.244433	0.172001	0.145525	0.0559575	0.47703	0.414069	0.468393	0.306202	0.201965	0.547449	0.437928	0.0946598	0.0612277	0.0595069	0.582597	0.0647393	0.432683	0.0560147	0.386502
Ba	0	0	0	0	0	0	0	0	0	0	0	0	0	0	0	0	0	0	0	0	0	0	0	0	0	0	0	0	0	0	0	0	0	0	0	0	0	0	0	0	0	0	0	0	0	0	0	0	0
Sr	0	0	0	0	0	0	0	0	0	0	0	0	0	0	0	0	0	0	0	0	0	0	0	0	0	0	0	0	0	0	0	0	0	0	0	0	0	0	0	0	0	0	0	0	0	0	0	0	0
Pb	0	0	0	0	0	0	0	0	0	0	0	0	0	0	0	0	0	0	0	0	0	0	0	0	0	0	0	0	0	0	0	0	0	0	0	0	0	0	0	0	0	0	0	0	0	0	0	0	0
F	0	0	0	0	0	0	0	0	0	0	0	0	0	0	0	0	0	0	0	0	0	0	0	0	0	0	0	0	0	0	0	0	0	0	0	0	0	0	0	0	0	0	0	0	0	0	0	0	0
Cl	0	0	0	0	0	0	0	0	0	0	0	0	0	0	0	0	0	0	0	0	0	0	0	0	0	0	0	0	0	0	0	0	0	0	0	0	0	0	0	0	0	0	0	0	0	0	0	0	0
OE FM	23	23	23	23	23	23	23	23	23	23	23	23	23	23	23	23	23	23	23	23	23	23	23	23	23	23	23	23	23	23	23	23	23	23	23	23	23	23	23	23	23	23	23	23	23	23	23	23	23
Part 7b. Formula based on 23 (O) inc. Fe2/Fe3 (Џ15)
Si	8.03496	7.66378	6.65161	7.92944	7.98909	8.05376	7.6606	7.88594	7.86154	8.10585	7.89478	7.89666	7.87697	7.84153	7.83909	7.57542	7.8177	7.81729	7.89469	7.88817	7.86296	7.85136	7.81689	7.82673	7.87036	7.80764	7.88615	7.87701	7.87252	7.87278	7.83472	7.82182	7.80805	7.80175	7.82607	7.90261	7.87349	7.82812	7.81239	7.87327	7.82705	7.8064	7.79145	7.79442	7.86764	7.79025	7.84702	7.79399	7.80704
Ti	0	0	0.0204174	0	0	0.00619426	0.0248785	0.0228504	0.0072557	0.0171089	0.0166187	0.0146121	0.0197952	0.00518673	0.00518785	0.0339116	0.00726235	0.0186769	0.0262062	0.0220028	0.0208955	0.0260708	0.00311651	0.0187171	0.0219725	0.00622784	0.0241177	0.0261845	0.0164473	0.0157051	0.0250243	0.00520481	0.0103931	0.00519238	0.0237273	0.0242066	0.0209753	0.018769	0.0208126	0.027272	0.0198972	0.00520376	0.00623255	0.00623604	0.032528	0.00415587	0.0177943	0.00519825	0.0182071
Al	0.0631324	0.757001	2.38495	0.00738775	0.0579225	0.200581	0.299616	0.0569599	0.168906	0.0351845	0.0390914	0.0343427	0.122433	0.157662	0.152819	0.474958	0.186942	0.225984	0.0344917	0.0820843	0.0605696	0.0456879	0.161144	0.0693972	0.0721348	0.16101	0.0361462	0.0886194	0.0375979	0.070542	0.127431	0.182677	0.174246	0.162715	0.0832858	0.084102	0.0377953	0.130704	0.114137	0.0723148	0.0747053	0.181009	0.187173	0.159593	0.0575432	0.170932	0.0377217	0.154754	0.0924551
Cr	0	0	0	0	0	0.103088	0.0835959	0.00873387	0.0991445	0.022479	0.0423768	0.0274265	0.0317577	0.0839576	0.0730698	0.101206	0.0545249	0.0610754	0.0286473	0.0286338	0.0472211	0.0130053	0.0917218	0.0390301	0.0208959	0.0861905	0.029759	0.00220181	0.0259373	0.00990459	0.0745256	0.0798737	0.0578987	0.0895068	0.00196058	0.00221249	0.0275591	0.0383604	0.0503152	0.0165379	0.0178449	0.109394	0.104817	0.0895813	0.0165437	0.102654	0.0264052	0.0874225	0.0107622
Fe3+	0	0	0	0.118537	0	0	0	0	0	0	0	0	0	0	0	0	0	0	0	0	0	0	0	0	0	0	0	0	0	0	0	0	0	0	0	0	0	0	0	0	0	0	0	0	0	0	0	0	0
Fe2+	0.0447969	2.4904	0.0624253	4.61249	0.54639	0.345487	0.287586	0.163978	0.322675	0.153362	0.233972	0.242525	0.237457	0.331003	0.325307	0.319197	0.239921	0.267637	0.291361	0.32151	0.262517	0.191439	0.333789	0.271879	0.217535	0.327741	0.282131	0.264336	0.237801	0.239796	0.258513	0.271975	0.246124	0.331364	0.32979	0.203602	0.291505	0.227223	0.227923	0.246067	0.322307	0.319362	0.32568	0.329328	0.232153	0.325745	0.239732	0.336362	0.288284
Mn	0.0680565	0.0370929	0	0.769849	2.03481	0.00930003	0.0051762	0	0.00933743	0.00120409	0.00245364	0.00352583	0.00234634	0.00934479	0.00934681	0.00516455	0.00584124	0.00584196	0.00354113	0.0058991	0.00352939	0.000904556	0.00935823	0.00565862	0.00235639	0.0105193	0.00236154	0.0035382	0.00134394	0.00353692	0.00352231	0.00468869	0.00234063	0.0105243	0.00404818	0.00118512	0.00354288	0.00352247	0.00468718	0.00354341	0.00423914	0.00585968	0.00935753	0.00819241	0.0023631	0.00935941	0.00353598	0.00819486	0.00313161
Mg	6.66787	3.9171	5.79055	1.49514	4.133	4.354	4.74395	4.92804	4.79059	4.66445	4.83487	4.91898	4.75737	4.85399	4.87149	4.54043	4.79498	4.69686	4.85723	4.72618	4.89288	4.92462	4.88567	4.87908	4.8441	4.91452	4.87546	4.793	4.87724	4.84523	4.80662	4.77601	4.84054	4.91073	4.81551	4.89133	4.89704	4.84195	4.9106	4.81461	4.79829	4.78536	4.87501	4.91893	4.8558	4.90276	4.99745	4.92452	4.84087
Ni	0	0	0	0	0	0	0	0	0	0	0	0	0	0	0	0	0	0	0	0	0	0	0	0	0	0	0	0	0	0	0	0	0	0	0	0	0	0	0	0	0	0	0	0	0	0	0	0	0
Zn	0	0	0	0	0	0	0	0	0	0	0	0	0	0	0	0	0	0	0	0	0	0	0	0	0	0	0	0	0	0	0	0	0	0	0	0	0	0	0	0	0	0	0	0	0	0	0	0	0
Li	0	0	0	0	0	0	0	0	0	0	0	0	0	0	0	0	0	0	0	0	0	0	0	0	0	0	0	0	0	0	0	0	0	0	0	0	0	0	0	0	0	0	0	0	0	0	0	0	0
Ca	0.0286959	0.0782008	0.0334447	0.0671599	0.184295	0.986708	1.23959	0.942407	0.946384	0.865122	0.858201	0.890511	1.10855	0.951563	0.959158	1.41402	1.34329	1.2267	0.848089	0.979019	0.878016	0.969595	0.952931	0.915849	1.00301	0.943268	0.851357	1.08459	0.871181	1.04394	0.960911	1.00529	1.0718	0.946683	1.00751	1.02239	0.835062	1.11245	1.10725	1.02493	1.00307	0.947276	0.957298	0.954872	0.981948	0.945651	0.921401	0.962562	1.03954
Na	0.0519302	0.0283036	0.384196	0.0151922	0.0728684	1.38113	1.46193	1.61977	1.52294	1.60418	1.9121	1.68148	1.43677	1.54019	1.55657	1.1999	1.05634	1.28649	1.65365	1.57455	1.72358	1.6267	1.53973	1.89269	1.5562	1.5545	1.63528	1.32291	1.94133	1.47626	1.65024	1.61532	1.56187	1.56061	1.55124	1.38087	1.70043	1.42722	1.46996	1.40326	1.63865	1.67134	1.53693	1.56726	1.44703	1.56938	1.58919	1.55701	1.65739
K	0	0	0	0	0	0.0770406	0.0939098	0.479147	0.0597708	0.36271	0.338898	0.377045	0.302156	0.0562992	0.0580711	0.0766633	0.151324	0.114387	0.472907	0.387387	0.343758	0.514372	0.058142	0.255296	0.461385	0.0563333	0.503297	0.500936	0.337064	0.463466	0.245807	0.173017	0.146303	0.0563606	0.480126	0.415901	0.471361	0.307714	0.202966	0.549707	0.440095	0.095317	0.0616612	0.0599329	0.585491	0.0651978	0.434938	0.0564243	0.388308
Ba	0	0	0	0	0	0	0	0	0	0	0	0	0	0	0	0	0	0	0	0	0	0	0	0	0	0	0	0	0	0	0	0	0	0	0	0	0	0	0	0	0	0	0	0	0	0	0	0	0
Sr	0	0	0	0	0	0	0	0	0	0	0	0	0	0	0	0	0	0	0	0	0	0	0	0	0	0	0	0	0	0	0	0	0	0	0	0	0	0	0	0	0	0	0	0	0	0	0	0	0
Pb	0	0	0	0	0	0	0	0	0	0	0	0	0	0	0	0	0	0	0	0	0	0	0	0	0	0	0	0	0	0	0	0	0	0	0	0	0	0	0	0	0	0	0	0	0	0	0	0	0
F	0	0	0	0	0	0	0	0	0	0	0	0	0	0	0	0	0	0	0	0	0	0	0	0	0	0	0	0	0	0	0	0	0	0	0	0	0	0	0	0	0	0	0	0	0	0	0	0	0
Cl	0	0	0	0	0	0	0	0	0	0	0	0	0	0	0	0	0	0	0	0	0	0	0	0	0	0	0	0	0	0	0	0	0	0	0	0	0	0	0	0	0	0	0	0	0	0	0	0	0
OE FM	23	23	23	23	23	23	23	23	23	23	23	23	23	23	23	23	23	23	23	23	23	23	23	23	23	23	23	23	23	23	23	23	23	23	23	23	23	23	23	23	23	23	23	23	23	23	23	23	23
Part 8. Select either Џ13 or Џ15
Si	8.03496	7.66378	6.65161	7.92944	7.98909	8.00915	7.61301	7.85793	7.80677	8.10585	7.85601	7.85524	7.84791	7.78551	7.78404	7.54623	7.77714	7.77207	7.845	7.84323	7.81834	7.81943	7.76058	7.78075	7.84059	7.7524	7.83808	7.84389	7.83203	7.83812	7.79093	7.77584	7.7665	7.74595	7.77559	7.86779	7.82391	7.78965	7.77387	7.84093	7.78851	7.75258	7.73668	7.73902	7.82875	7.73548	7.80634	7.73741	7.77072
Ti	0	0	0.0204174	0	0	0.00615995	0.0247239	0.0227692	0.00720516	0.0171089	0.0165371	0.0145355	0.0197221	0.00514967	0.00515142	0.0337809	0.00722466	0.0185689	0.0260413	0.0218775	0.0207769	0.0259648	0.00309406	0.0186071	0.0218894	0.00618378	0.0239707	0.0260744	0.0163627	0.0156359	0.0248844	0.00517422	0.0103378	0.00515524	0.0235742	0.0240999	0.0208433	0.0186768	0.02071	0.02716	0.0197993	0.00516788	0.00618874	0.00619171	0.0323672	0.00412665	0.0177021	0.00516052	0.0181224
Al	0.0631324	0.757001	2.38495	0.00738775	0.0579225	0.19947	0.297755	0.0567576	0.16773	0.0351845	0.0388994	0.0341626	0.121981	0.156535	0.151745	0.473128	0.185972	0.224677	0.0342746	0.0816167	0.0602259	0.0455021	0.159983	0.0689894	0.0718619	0.159871	0.0359258	0.0882469	0.0374046	0.0702314	0.126719	0.181603	0.173318	0.161551	0.0827486	0.0837314	0.0375573	0.130062	0.113574	0.0720178	0.0743374	0.179761	0.185857	0.158459	0.0572588	0.16973	0.0375261	0.153631	0.092025
Cr	0	0	0	0	0	0.102517	0.0830765	0.00870284	0.0984539	0.022479	0.0421687	0.0272826	0.0316406	0.0833578	0.0725567	0.100816	0.054242	0.0607221	0.028467	0.0284706	0.0469532	0.0129524	0.091061	0.0388008	0.0208168	0.0855807	0.0295776	0.00219256	0.0258039	0.00986098	0.0741091	0.0794042	0.0575906	0.0888667	0.00194793	0.00220274	0.0273855	0.0381719	0.0500672	0.01647	0.0177571	0.10864	0.10408	0.0889445	0.0164619	0.101932	0.0262683	0.0867879	0.0107121
Fe3+	0	0	0	0.118537	0	0.254824	0.285799	0.163396	0.320428	0	0.225921	0.241253	0.169677	0.328638	0.323022	0.177255	0.238676	0.266089	0.289527	0.262051	0.261027	0.187091	0.331384	0.270281	0.173973	0.325423	0.280411	0.193393	0.236578	0.202533	0.257068	0.270377	0.244814	0.328994	0.296678	0.202704	0.289669	0.226106	0.226799	0.188933	0.226512	0.31716	0.32339	0.326987	0.227375	0.323454	0.238489	0.33392	0.213978
Fe2+	0.0447969	2.4904	0.0624253	4.61249	0.54639	0.0887488	0	0	0	0.153362	0.00690139	0	0.0669049	0	0	0.140712	0	0	0	0.0576278	0	0.00356976	0	0	0.0427392	0	0	0.0698315	0	0.036207	0	0	0	0	0.030985	0	0	0	0	0.0561225	0.0942082	0	0	0	0.00363115	0	0	0	0.0729658
Mn	0.0680565	0.0370929	0	0.769849	2.03481	0.00924851	0.00514404	0	0.00927239	0.00120409	0.00244159	0.00350734	0.00233769	0.00927803	0.00928118	0.00514465	0.00581093	0.00580817	0.00351884	0.00586549	0.00350936	0.000900877	0.00929081	0.00562537	0.00234748	0.0104448	0.00234714	0.00352332	0.00133703	0.00352135	0.00350263	0.00466113	0.00232818	0.0104491	0.00402207	0.0011799	0.00352057	0.00350515	0.00466407	0.00352885	0.00421827	0.00581928	0.00929174	0.00813417	0.00235142	0.00929359	0.00351765	0.00813537	0.00311704
Mg	6.66787	3.9171	5.79055	1.49514	4.133	4.32988	4.71448	4.91053	4.75722	4.66445	4.81112	4.89318	4.73982	4.81931	4.83728	4.52294	4.7701	4.66969	4.82665	4.69926	4.86512	4.90459	4.85047	4.85041	4.82578	4.87976	4.84574	4.77285	4.85216	4.82389	4.77975	4.74793	4.81478	4.87561	4.78445	4.86978	4.8662	4.81816	4.88638	4.79484	4.77466	4.75236	4.84074	4.88397	4.8318	4.86828	4.97154	4.88878	4.81836
Ni	0	0	0	0	0	0	0	0	0	0	0	0	0	0	0	0	0	0	0	0	0	0	0	0	0	0	0	0	0	0	0	0	0	0	0	0	0	0	0	0	0	0	0	0	0	0	0	0	0
Zn	0	0	0	0	0	0	0	0	0	0	0	0	0	0	0	0	0	0	0	0	0	0	0	0	0	0	0	0	0	0	0	0	0	0	0	0	0	0	0	0	0	0	0	0	0	0	0	0	0
Li	0	0	0	0	0	0	0	0	0	0	0	0	0	0	0	0	0	0	0	0	0	0	0	0	0	0	0	0	0	0	0	0	0	0	0	0	0	0	0	0	0	0	0	0	0	0	0	0	0
Ca	0.0286959	0.0782008	0.0334447	0.0671599	0.184295	0.981242	1.23189	0.939059	0.939792	0.865122	0.853986	0.88584	1.10446	0.944764	0.952423	1.40857	1.33632	1.21961	0.842751	0.973442	0.873033	0.965651	0.946066	0.910468	0.999214	0.936595	0.846167	1.08003	0.8667	1.03934	0.955541	0.999384	1.0661	0.939912	1.00101	1.01789	0.829804	1.10698	1.10179	1.02072	0.998134	0.940744	0.950568	0.948085	0.977095	0.939002	0.916624	0.955575	1.03471
Na	0.0519302	0.0283036	0.384196	0.0151922	0.0728684	1.37348	1.45285	1.61402	1.51234	1.60418	1.90271	1.67266	1.43147	1.52919	1.54564	1.19528	1.05086	1.27905	1.64324	1.56558	1.71379	1.62008	1.52863	1.88157	1.55031	1.5435	1.62531	1.31734	1.93134	1.46976	1.64102	1.60583	1.55355	1.54944	1.54124	1.37478	1.68972	1.42021	1.46271	1.3975	1.63059	1.65981	1.52613	1.55612	1.43988	1.55834	1.58095	1.54571	1.64968
K	0	0	0	0	0	0.0766139	0.0933263	0.477445	0.0593545	0.36271	0.337233	0.375067	0.301041	0.055897	0.0576633	0.0763678	0.150538	0.113725	0.46993	0.38518	0.341807	0.51228	0.0577232	0.253796	0.45964	0.0559348	0.500229	0.49883	0.33533	0.461425	0.244433	0.172001	0.145525	0.0559575	0.47703	0.414069	0.468393	0.306202	0.201965	0.547449	0.437928	0.0946598	0.0612277	0.0595069	0.582597	0.0647393	0.432683	0.0560147	0.386502
Ba	0	0	0	0	0	0	0	0	0	0	0	0	0	0	0	0	0	0	0	0	0	0	0	0	0	0	0	0	0	0	0	0	0	0	0	0	0	0	0	0	0	0	0	0	0	0	0	0	0
Sr	0	0	0	0	0	0	0	0	0	0	0	0	0	0	0	0	0	0	0	0	0	0	0	0	0	0	0	0	0	0	0	0	0	0	0	0	0	0	0	0	0	0	0	0	0	0	0	0	0
Pb	0	0	0	0	0	0	0	0	0	0	0	0	0	0	0	0	0	0	0	0	0	0	0	0	0	0	0	0	0	0	0	0	0	0	0	0	0	0	0	0	0	0	0	0	0	0	0	0	0
F	0	0	0	0	0	0	0	0	0	0	0	0	0	0	0	0	0	0	0	0	0	0	0	0	0	0	0	0	0	0	0	0	0	0	0	0	0	0	0	0	0	0	0	0	0	0	0	0	0
Cl	0	0	0	0	0	0	0	0	0	0	0	0	0	0	0	0	0	0	0	0	0	0	0	0	0	0	0	0	0	0	0	0	0	0	0	0	0	0	0	0	0	0	0	0	0	0	0	0	0
OE FM	23	23	23	23	23	23	23	23	23	23	23	23	23	23	23	23	23	23	23	23	23	23	23	23	23	23	23	23	23	23	23	23	23	23	23	23	23	23	23	23	23	23	23	23	23	23	23	23	23
Part 9. Iron oxide, water and site allocation calcs.
FeO calc	0.4	20.4	0.55	35.1955	4.52	0.777518	0	0	0	1.29	0.0598329	0	0.579737	0	0	1.26596	0	0	0	0.497539	0	0.0309025	0	0	0.368795	0	0	0.602213	0	0.312417	0	0	0	0	0.269185	0	0	0	0	0.483231	0.816567	0	0	0	0.0312806	0	0	0	0.633021
Fe2O3 calc	0	0	0	1.00516	0	2.48096	2.88282	1.57805	3.11164	0	2.17667	2.32262	1.6339	3.18943	3.13387	1.77223	2.3115	2.57822	2.77825	2.51427	2.51154	1.79986	3.21166	2.612	1.66829	3.15609	2.68935	1.85341	2.27039	1.94209	2.4782	2.61156	2.36707	3.18943	2.86428	1.93366	2.77825	2.17815	2.18926	1.80783	2.18185	3.06719	3.13387	3.16721	2.17672	3.13387	2.28928	3.23388	2.06299
H2O - Џ13	2.24124	2.16527	2.2123	2.10526	2.09902	2.19685	2.27604	2.17922	2.1912	2.10924	2.17399	2.17233	2.17283	2.18986	2.18912	2.25602	2.18528	2.18632	2.16523	2.16495	2.17108	2.17074	2.18685	2.18061	2.16377	2.18839	2.16408	2.16248	2.16545	2.16369	2.17525	2.17948	2.18171	2.1875	2.17847	2.15248	2.16417	2.17369	2.1781	2.15909	2.17348	2.18215	2.18663	2.18558	2.16015	2.1862	2.16597	2.18526	2.17546
H2O - Џ15	2.23906	2.05406	2.2093	1.9134	2.07438	2.18468	2.2619	2.17148	2.17593	2.10924	2.16331	2.16094	2.16482	2.17422	2.17375	2.24733	2.17394	2.17367	2.1516	2.15262	2.15876	2.16191	2.1711	2.1678	2.15559	2.1729	2.15089	2.15339	2.15431	2.15416	2.1631	2.16667	2.1701	2.17185	2.16442	2.143	2.15054	2.163	2.16736	2.15022	2.16278	2.1671	2.17126	2.17005	2.14947	2.17083	2.15474	2.1694	2.16534
Site Allocation
Mg+Ni+Li	6.66787	3.9171	5.79055	1.49514	4.133	4.32988	4.71448	4.91053	4.75722	4.66445	4.81112	4.89318	4.73982	4.81931	4.83728	4.52294	4.7701	4.66969	4.82665	4.69926	4.86512	4.90459	4.85047	4.85041	4.82578	4.87976	4.84574	4.77285	4.85216	4.82389	4.77975	4.74793	4.81478	4.87561	4.78445	4.86978	4.8662	4.81816	4.88638	4.79484	4.77466	4.75236	4.84074	4.88397	4.8318	4.86828	4.97154	4.88878	4.81836
Mn+Zn	0.0680565	0.0370929	0	0.769849	2.03481	0.00924851	0.00514404	0	0.00927239	0.00120409	0.00244159	0.00350734	0.00233769	0.00927803	0.00928118	0.00514465	0.00581093	0.00580817	0.00351884	0.00586549	0.00350936	0.000900877	0.00929081	0.00562537	0.00234748	0.0104448	0.00234714	0.00352332	0.00133703	0.00352135	0.00350263	0.00466113	0.00232818	0.0104491	0.00402207	0.0011799	0.00352057	0.00350515	0.00466407	0.00352885	0.00421827	0.00581928	0.00929174	0.00813417	0.00235142	0.00929359	0.00351765	0.00813537	0.00311704
Ca+Sr	0.0286959	0.0782008	0.0334447	0.0671599	0.184295	0.981242	1.23189	0.939059	0.939792	0.865122	0.853986	0.88584	1.10446	0.944764	0.952423	1.40857	1.33632	1.21961	0.842751	0.973442	0.873033	0.965651	0.946066	0.910468	0.999214	0.936595	0.846167	1.08003	0.8667	1.03934	0.955541	0.999384	1.0661	0.939912	1.00101	1.01789	0.829804	1.10698	1.10179	1.02072	0.998134	0.940744	0.950568	0.948085	0.977095	0.939002	0.916624	0.955575	1.03471
K+Ba	0	0	0	0	0	0.0766139	0.0933263	0.477445	0.0593545	0.36271	0.337233	0.375067	0.301041	0.055897	0.0576633	0.0763678	0.150538	0.113725	0.46993	0.38518	0.341807	0.51228	0.0577232	0.253796	0.45964	0.0559348	0.500229	0.49883	0.33533	0.461425	0.244433	0.172001	0.145525	0.0559575	0.47703	0.414069	0.468393	0.306202	0.201965	0.547449	0.437928	0.0946598	0.0612277	0.0595069	0.582597	0.0647393	0.432683	0.0560147	0.386502
Al iv (1)	-0.034957	0.336224	1.34839	0.00738775	0.010907	-0.00914704	0.297755	0.0567576	0.16773	-0.105854	0.0388994	0.0341626	0.121981	0.156535	0.151745	0.453773	0.185972	0.224677	0.0342746	0.0816167	0.0602259	0.0455021	0.159983	0.0689894	0.0718619	0.159871	0.0359258	0.0882469	0.0374046	0.0702314	0.126719	0.181603	0.173318	0.161551	0.0827486	0.0837314	0.0375573	0.130062	0.113574	0.0720178	0.0743374	0.179761	0.185857	0.158459	0.0572588	0.16973	0.0375261	0.153631	0.092025
Al iv (2)	0	0.336224	1.34839	0.00738775	0.010907	0	0.297755	0.0567576	0.16773	0	0.0388994	0.0341626	0.121981	0.156535	0.151745	0.453773	0.185972	0.224677	0.0342746	0.0816167	0.0602259	0.0455021	0.159983	0.0689894	0.0718619	0.159871	0.0359258	0.0882469	0.0374046	0.0702314	0.126719	0.181603	0.173318	0.161551	0.0827486	0.0837314	0.0375573	0.130062	0.113574	0.0720178	0.0743374	0.179761	0.185857	0.158459	0.0572588	0.16973	0.0375261	0.153631	0.092025
Al vi	0.0631324	0.420777	1.03656	0	0.0470155	0.19947	0	0	0	0.0351845	0	0	0	0	0	0.019355	0	0	0	0	0	0	0	0	0	0	0	0	0	0	0	0	0	0	0	0	0	0	0	0	0	0	0	0	0	0	0	0	0
Limit Si max =8	8	7.66378	6.65161	7.92944	7.98909	8	7.61301	7.85793	7.80677	8	7.85601	7.85524	7.84791	7.78551	7.78404	7.54623	7.77714	7.77207	7.845	7.84323	7.81834	7.81943	7.76058	7.78075	7.84059	7.7524	7.83808	7.84389	7.83203	7.83812	7.79093	7.77584	7.7665	7.74595	7.77559	7.86779	7.82391	7.78965	7.77387	7.84093	7.78851	7.75258	7.73668	7.73902	7.82875	7.73548	7.80634	7.73741	7.77072
Total T site (Si max)	8.06313	8.42078	9.05698	8.05537	8.04702	8.56297	8.30436	8.10955	8.40059	8.07477	8.17954	8.17248	8.19094	8.35919	8.33652	8.33121	8.26326	8.34213	8.22331	8.23725	8.20732	8.09094	8.3461	8.17742	8.12913	8.32946	8.20797	8.1538	8.14818	8.13638	8.27371	8.3124	8.25256	8.33052	8.18054	8.18052	8.19936	8.20266	8.18502	8.14551	8.12691	8.36331	8.35619	8.3196	8.16222	8.33472	8.12632	8.31691	8.10556
Excess T if T>8	0.0631324	0.420777	1.05698	0.0553661	0.0470155	0.562971	0.304361	0.109552	0.400589	0.0747723	0.179536	0.172477	0.190935	0.359188	0.336515	0.331207	0.263257	0.342127	0.223312	0.237248	0.20732	0.0909397	0.346103	0.177425	0.129135	0.329461	0.207966	0.153796	0.14818	0.136378	0.273713	0.312399	0.252559	0.330519	0.180544	0.180524	0.199364	0.202663	0.185024	0.145512	0.126912	0.363309	0.356194	0.319599	0.162217	0.334719	0.126323	0.316911	0.105561
Limit XsT max =5	0.0631324	0.420777	1.05698	0.0553661	0.0470155	0.562971	0.304361	0.109552	0.400589	0.0747723	0.179536	0.172477	0.190935	0.359188	0.336515	0.331207	0.263257	0.342127	0.223312	0.237248	0.20732	0.0909397	0.346103	0.177425	0.129135	0.329461	0.207966	0.153796	0.14818	0.136378	0.273713	0.312399	0.252559	0.330519	0.180544	0.180524	0.199364	0.202663	0.185024	0.145512	0.126912	0.363309	0.356194	0.319599	0.162217	0.334719	0.126323	0.316911	0.105561
Total C site (T max)	6.84386	6.86537	6.90996	6.93284	6.76122	4.99085	5.02398	5.02008	5.16708	4.89379	5	5.06917	5	5.18777	5.18307	5	5.03917	5.01763	5.05348	5	5.07595	5	5.20587	5.03346	5	5.21966	5.05605	5	5.00168	5	5.05697	5.06499	5.06967	5.21657	5	5.05148	5.06908	5.02432	5.07607	5	5	5.12149	5.20622	5.2117	5	5.2123	5.10138	5.21382	5
Excess C if C>5	1.84386	1.86537	1.90996	1.93284	1.76122	0	0.023982	0.0200842	0.167079	0	0	0.0691666	0	0.187772	0.183073	0	0.0391654	0.0176263	0.0534847	0	0.0759486	0	0.205867	0.0334594	0	0.219662	0.0560538	0	0.00167615	0	0.0569691	0.0649943	0.069667	0.216574	0	0.0514829	0.0690827	0.024323	0.0760719	0	0	0.121492	0.206224	0.211698	0	0.212296	0.101377	0.213822	0
Limit XsC max =2	1.84386	1.86537	1.90996	1.93284	1.76122	0	0.023982	0.0200842	0.167079	0	0	0.0691666	0	0.187772	0.183073	0	0.0391654	0.0176263	0.0534847	0	0.0759486	0	0.205867	0.0334594	0	0.219662	0.0560538	0	0.00167615	0	0.0569691	0.0649943	0.069667	0.216574	0	0.0514829	0.0690827	0.024323	0.0760719	0	0	0.121492	0.206224	0.211698	0	0.212296	0.101377	0.213822	0
Total B site (C max)	1.92443	1.97188	2.32708	2.01381	2.01752	2.35472	2.70871	2.57316	2.61921	2.4693	2.7567	2.62767	2.53593	2.66172	2.68113	2.60385	2.42635	2.51628	2.53948	2.53902	2.66278	2.58573	2.68057	2.8255	2.54953	2.69976	2.52753	2.39738	2.79972	2.5091	2.65353	2.67021	2.68932	2.70593	2.54225	2.44415	2.5886	2.55151	2.64057	2.41822	2.62872	2.72205	2.68292	2.7159	2.41697	2.70964	2.59895	2.7151	2.68439
Excess B if B>2	0	0	0.327076	0.0138077	0.0175246	0.354719	0.708714	0.573163	0.619207	0.469299	0.756698	0.627671	0.535929	0.661722	0.681135	0.603849	0.426349	0.516278	0.53948	0.53902	0.662777	0.585734	0.680566	0.825499	0.549528	0.699759	0.527532	0.397377	0.79972	0.509104	0.653528	0.670208	0.689316	0.705929	0.542248	0.444151	0.588605	0.551511	0.640568	0.418224	0.62872	0.722048	0.68292	0.715903	0.41697	0.709641	0.598952	0.715105	0.684385
Excess B restricted to Na	0	0	0.327076	0.0138077	0.0175246	0.354719	0.708714	0.573163	0.619207	0.469299	0.756698	0.627671	0.535929	0.661722	0.681135	0.603849	0.426349	0.516278	0.53948	0.53902	0.662777	0.585734	0.680566	0.825499	0.549528	0.699759	0.527532	0.397377	0.79972	0.509104	0.653528	0.670208	0.689316	0.705929	0.542248	0.444151	0.588605	0.551511	0.640568	0.418224	0.62872	0.722048	0.68292	0.715903	0.41697	0.709641	0.598952	0.715105	0.684385
Total A site (No Ca)	0	0	0.327076	0.0138077	0.0175246	0.431333	0.80204	1.05061	0.678562	0.83201	1.09393	1.00274	0.83697	0.717619	0.738798	0.680217	0.576888	0.630002	1.00941	0.9242	1.00458	1.09801	0.738289	1.0793	1.00917	0.755694	1.02776	0.896207	1.13505	0.970529	0.897961	0.842208	0.834841	0.761887	1.01928	0.858219	1.057	0.857712	0.842533	0.965673	1.06665	0.816708	0.744148	0.77541	0.999567	0.774381	1.03163	0.771119	1.07089
Excess Na in A	0	0	0	0	0	0	0	0.050608	0	0	0.093931	0.00273817	0	0	0	0	0	0	0.00941001	0	0.00458432	0.0980142	0	0.0792951	0.00916777	0	0.0277609	0	0.135051	0	0	0	0	0	0.0192776	0	0.0569978	0	0	0	0.0666475	0	0	0	0	0	0.0316349	0	0.070887
Excess Na if K>1	0	0	0	0	0	0	0	0.050608	0	0	0.093931	0.00273817	0	0	0	0	0	0	0.00941001	0	0.00458432	0.0980142	0	0.0792951	0.00916777	0	0.0277609	0	0.135051	0	0	0	0	0	0.0192776	0	0.0569978	0	0	0	0.0666475	0	0	0	0	0	0.0316349	0	0.070887
Set (Na+K)A to max 1	0	0	0.327076	0.0138077	0.0175246	0.431333	0.80204	1	0.678562	0.83201	1	1	0.83697	0.717619	0.738798	0.680217	0.576888	0.630002	1	0.9242	1	1	0.738289	1	1	0.755694	1	0.896207	1	0.970529	0.897961	0.842208	0.834841	0.761887	1	0.858219	1	0.857712	0.842533	0.965673	1	0.816708	0.744148	0.77541	0.999567	0.774381	1	0.771119	1
If K>1 set (Na+K)A=KA	0	0	0.327076	0.0138077	0.0175246	0.431333	0.80204	1	0.678562	0.83201	1	1	0.83697	0.717619	0.738798	0.680217	0.576888	0.630002	1	0.9242	1	1	0.738289	1	1	0.755694	1	0.896207	1	0.970529	0.897961	0.842208	0.834841	0.761887	1	0.858219	1	0.857712	0.842533	0.965673	1	0.816708	0.744148	0.77541	0.999567	0.774381	1	0.771119	1
Na(B)	0.0519302	0.0283036	0.0571196	0.00138451	0.0553438	1.01876	0.744133	1.09146	0.893129	1.13488	1.23994	1.04773	0.895542	0.867463	0.864504	0.591432	0.624511	0.762769	1.11317	1.02656	1.0556	1.13236	0.848067	1.13537	1.00995	0.843743	1.12554	0.919966	1.26667	0.960659	0.98749	0.935621	0.864237	0.843514	1.01827	0.930629	1.15811	0.868698	0.82214	0.979276	1.06851	0.937764	0.843208	0.840217	1.02291	0.848702	1.01363	0.830603	1.03618
(Na+K)A	0	0	0.327076	0.0138077	0.0175246	0.431333	0.80204	1	0.678562	0.83201	1	1	0.83697	0.717619	0.738798	0.680217	0.576888	0.630002	1	0.9242	1	1	0.738289	1	1	0.755694	1	0.896207	1	0.970529	0.897961	0.842208	0.834841	0.761887	1	0.858219	1	0.857712	0.842533	0.965673	1	0.816708	0.744148	0.77541	0.999567	0.774381	1	0.771119	1
(Ca+Na)B	0.0806261	0.106504	0.0905643	0.0685444	0.239638	2	1.97602	2.03052	1.83292	2	2.09393	1.93357	2	1.81223	1.81693	2	1.96083	1.98237	1.95593	2	1.92864	2.09801	1.79413	2.04584	2.00917	1.78034	1.97171	2	2.13337	2	1.94303	1.93501	1.93033	1.78343	2.01928	1.94852	1.98792	1.97568	1.92393	2	2.06665	1.87851	1.79378	1.7883	2	1.7877	1.93026	1.78618	2.07089
Mg/(Mg + Fe2+)	0.993327	0.61133	0.989334	0.244798	0.883235	0.979915	1	1	1	0.968168	0.998568	1	0.986081	1	1	0.969828	1	1	1	0.987885	1	0.999273	1	1	0.991221	1	1	0.98558	1	0.99255	1	1	1	1	0.993565	1	1	1	1	0.988431	0.980651	1	1	1	0.999249	1	1	1	0.985083
Fe3+/(Fe3+ + Al vi)	0	0	0	1	0	0.560923	1	1	1	0	1	1	1	1	1	0.901556	1	1	1	1	1	1	1	1	1	1	1	1	1	1	1	1	1	1	1	1	1	1	1	1	1	1	1	1	1	1	1	1	1
Part 10. Amphibole specific names
tremolite	tremolite	FALSE	FALSE	FALSE	FALSE	tremolite	tremolite	tremolite	tremolite	tremolite	tremolite	tremolite	tremolite	tremolite	tremolite	tremolite	tremolite	tremolite	tremolite	tremolite	tremolite	tremolite	tremolite	tremolite	tremolite	tremolite	tremolite	tremolite	tremolite	tremolite	tremolite	tremolite	tremolite	tremolite	tremolite	tremolite	tremolite	tremolite	tremolite	tremolite	tremolite	tremolite	tremolite	tremolite	tremolite	tremolite	tremolite	tremolite	tremolite
actinolite	FALSE	actinolite	FALSE	FALSE	actinolite	FALSE	FALSE	FALSE	FALSE	FALSE	FALSE	FALSE	FALSE	FALSE	FALSE	FALSE	FALSE	FALSE	FALSE	FALSE	FALSE	FALSE	FALSE	FALSE	FALSE	FALSE	FALSE	FALSE	FALSE	FALSE	FALSE	FALSE	FALSE	FALSE	FALSE	FALSE	FALSE	FALSE	FALSE	FALSE	FALSE	FALSE	FALSE	FALSE	FALSE	FALSE	FALSE	FALSE	FALSE
ferro-actinolite	FALSE	FALSE	FALSE	ferro-actinolite	FALSE	FALSE	FALSE	FALSE	FALSE	FALSE	FALSE	FALSE	FALSE	FALSE	FALSE	FALSE	FALSE	FALSE	FALSE	FALSE	FALSE	FALSE	FALSE	FALSE	FALSE	FALSE	FALSE	FALSE	FALSE	FALSE	FALSE	FALSE	FALSE	FALSE	FALSE	FALSE	FALSE	FALSE	FALSE	FALSE	FALSE	FALSE	FALSE	FALSE	FALSE	FALSE	FALSE	FALSE	FALSE
tremolitic hornblende	FALSE	FALSE	FALSE	FALSE	FALSE	FALSE	FALSE	FALSE	FALSE	FALSE	FALSE	FALSE	FALSE	FALSE	FALSE	FALSE	FALSE	FALSE	FALSE	FALSE	FALSE	FALSE	FALSE	FALSE	FALSE	FALSE	FALSE	FALSE	FALSE	FALSE	FALSE	FALSE	FALSE	FALSE	FALSE	FALSE	FALSE	FALSE	FALSE	FALSE	FALSE	FALSE	FALSE	FALSE	FALSE	FALSE	FALSE	FALSE	FALSE
actinolitic hornblende	FALSE	FALSE	FALSE	FALSE	FALSE	FALSE	FALSE	FALSE	FALSE	FALSE	FALSE	FALSE	FALSE	FALSE	FALSE	FALSE	FALSE	FALSE	FALSE	FALSE	FALSE	FALSE	FALSE	FALSE	FALSE	FALSE	FALSE	FALSE	FALSE	FALSE	FALSE	FALSE	FALSE	FALSE	FALSE	FALSE	FALSE	FALSE	FALSE	FALSE	FALSE	FALSE	FALSE	FALSE	FALSE	FALSE	FALSE	FALSE	FALSE
ferro-actinolitic hornblende	FALSE	FALSE	FALSE	FALSE	FALSE	FALSE	FALSE	FALSE	FALSE	FALSE	FALSE	FALSE	FALSE	FALSE	FALSE	FALSE	FALSE	FALSE	FALSE	FALSE	FALSE	FALSE	FALSE	FALSE	FALSE	FALSE	FALSE	FALSE	FALSE	FALSE	FALSE	FALSE	FALSE	FALSE	FALSE	FALSE	FALSE	FALSE	FALSE	FALSE	FALSE	FALSE	FALSE	FALSE	FALSE	FALSE	FALSE	FALSE	FALSE
magnesio-hornblende	FALSE	FALSE	magnesio-hornblende	FALSE	FALSE	FALSE	FALSE	FALSE	FALSE	FALSE	FALSE	FALSE	FALSE	FALSE	FALSE	FALSE	FALSE	FALSE	FALSE	FALSE	FALSE	FALSE	FALSE	FALSE	FALSE	FALSE	FALSE	FALSE	FALSE	FALSE	FALSE	FALSE	FALSE	FALSE	FALSE	FALSE	FALSE	FALSE	FALSE	FALSE	FALSE	FALSE	FALSE	FALSE	FALSE	FALSE	FALSE	FALSE	FALSE
ferro-hornblende	FALSE	FALSE	FALSE	FALSE	FALSE	FALSE	FALSE	FALSE	FALSE	FALSE	FALSE	FALSE	FALSE	FALSE	FALSE	FALSE	FALSE	FALSE	FALSE	FALSE	FALSE	FALSE	FALSE	FALSE	FALSE	FALSE	FALSE	FALSE	FALSE	FALSE	FALSE	FALSE	FALSE	FALSE	FALSE	FALSE	FALSE	FALSE	FALSE	FALSE	FALSE	FALSE	FALSE	FALSE	FALSE	FALSE	FALSE	FALSE	FALSE
tschermakitic hornblende	FALSE	FALSE	FALSE	FALSE	FALSE	FALSE	FALSE	FALSE	FALSE	FALSE	FALSE	FALSE	FALSE	FALSE	FALSE	FALSE	FALSE	FALSE	FALSE	FALSE	FALSE	FALSE	FALSE	FALSE	FALSE	FALSE	FALSE	FALSE	FALSE	FALSE	FALSE	FALSE	FALSE	FALSE	FALSE	FALSE	FALSE	FALSE	FALSE	FALSE	FALSE	FALSE	FALSE	FALSE	FALSE	FALSE	FALSE	FALSE	FALSE
ferro-tschermakitic hornblende	FALSE	FALSE	FALSE	FALSE	FALSE	FALSE	FALSE	FALSE	FALSE	FALSE	FALSE	FALSE	FALSE	FALSE	FALSE	FALSE	FALSE	FALSE	FALSE	FALSE	FALSE	FALSE	FALSE	FALSE	FALSE	FALSE	FALSE	FALSE	FALSE	FALSE	FALSE	FALSE	FALSE	FALSE	FALSE	FALSE	FALSE	FALSE	FALSE	FALSE	FALSE	FALSE	FALSE	FALSE	FALSE	FALSE	FALSE	FALSE	FALSE
tschermakite	FALSE	FALSE	FALSE	FALSE	FALSE	FALSE	FALSE	FALSE	FALSE	FALSE	FALSE	FALSE	FALSE	FALSE	FALSE	FALSE	FALSE	FALSE	FALSE	FALSE	FALSE	FALSE	FALSE	FALSE	FALSE	FALSE	FALSE	FALSE	FALSE	FALSE	FALSE	FALSE	FALSE	FALSE	FALSE	FALSE	FALSE	FALSE	FALSE	FALSE	FALSE	FALSE	FALSE	FALSE	FALSE	FALSE	FALSE	FALSE	FALSE
ferro-tschermakite	FALSE	FALSE	FALSE	FALSE	FALSE	FALSE	FALSE	FALSE	FALSE	FALSE	FALSE	FALSE	FALSE	FALSE	FALSE	FALSE	FALSE	FALSE	FALSE	FALSE	FALSE	FALSE	FALSE	FALSE	FALSE	FALSE	FALSE	FALSE	FALSE	FALSE	FALSE	FALSE	FALSE	FALSE	FALSE	FALSE	FALSE	FALSE	FALSE	FALSE	FALSE	FALSE	FALSE	FALSE	FALSE	FALSE	FALSE	FALSE	FALSE
subsilicic-tschermakite	FALSE	FALSE	FALSE	FALSE	FALSE	FALSE	FALSE	FALSE	FALSE	FALSE	FALSE	FALSE	FALSE	FALSE	FALSE	FALSE	FALSE	FALSE	FALSE	FALSE	FALSE	FALSE	FALSE	FALSE	FALSE	FALSE	FALSE	FALSE	FALSE	FALSE	FALSE	FALSE	FALSE	FALSE	FALSE	FALSE	FALSE	FALSE	FALSE	FALSE	FALSE	FALSE	FALSE	FALSE	FALSE	FALSE	FALSE	FALSE	FALSE
subsilicic ferro-tschermakite	FALSE	FALSE	FALSE	FALSE	FALSE	FALSE	FALSE	FALSE	FALSE	FALSE	FALSE	FALSE	FALSE	FALSE	FALSE	FALSE	FALSE	FALSE	FALSE	FALSE	FALSE	FALSE	FALSE	FALSE	FALSE	FALSE	FALSE	FALSE	FALSE	FALSE	FALSE	FALSE	FALSE	FALSE	FALSE	FALSE	FALSE	FALSE	FALSE	FALSE	FALSE	FALSE	FALSE	FALSE	FALSE	FALSE	FALSE	FALSE	FALSE
silicic edenite	FALSE	silicic edenite	FALSE	FALSE	silicic edenite	FALSE	silicic edenite	silicic edenite	silicic edenite	FALSE	silicic edenite	silicic edenite	silicic edenite	silicic edenite	silicic edenite	silicic edenite	silicic edenite	silicic edenite	silicic edenite	silicic edenite	silicic edenite	silicic edenite	silicic edenite	silicic edenite	silicic edenite	silicic edenite	silicic edenite	silicic edenite	silicic edenite	silicic edenite	silicic edenite	silicic edenite	silicic edenite	silicic edenite	silicic edenite	silicic edenite	silicic edenite	silicic edenite	silicic edenite	silicic edenite	silicic edenite	silicic edenite	silicic edenite	silicic edenite	silicic edenite	silicic edenite	silicic edenite	silicic edenite	silicic edenite
silicic ferro-edenite	FALSE	FALSE	FALSE	silicic ferro-edenite	FALSE	FALSE	FALSE	FALSE	FALSE	FALSE	FALSE	FALSE	FALSE	FALSE	FALSE	FALSE	FALSE	FALSE	FALSE	FALSE	FALSE	FALSE	FALSE	FALSE	FALSE	FALSE	FALSE	FALSE	FALSE	FALSE	FALSE	FALSE	FALSE	FALSE	FALSE	FALSE	FALSE	FALSE	FALSE	FALSE	FALSE	FALSE	FALSE	FALSE	FALSE	FALSE	FALSE	FALSE	FALSE
edenite	FALSE	FALSE	FALSE	FALSE	FALSE	FALSE	FALSE	FALSE	FALSE	FALSE	FALSE	FALSE	FALSE	FALSE	FALSE	FALSE	FALSE	FALSE	FALSE	FALSE	FALSE	FALSE	FALSE	FALSE	FALSE	FALSE	FALSE	FALSE	FALSE	FALSE	FALSE	FALSE	FALSE	FALSE	FALSE	FALSE	FALSE	FALSE	FALSE	FALSE	FALSE	FALSE	FALSE	FALSE	FALSE	FALSE	FALSE	FALSE	FALSE
ferro-edenite	FALSE	FALSE	FALSE	FALSE	FALSE	FALSE	FALSE	FALSE	FALSE	FALSE	FALSE	FALSE	FALSE	FALSE	FALSE	FALSE	FALSE	FALSE	FALSE	FALSE	FALSE	FALSE	FALSE	FALSE	FALSE	FALSE	FALSE	FALSE	FALSE	FALSE	FALSE	FALSE	FALSE	FALSE	FALSE	FALSE	FALSE	FALSE	FALSE	FALSE	FALSE	FALSE	FALSE	FALSE	FALSE	FALSE	FALSE	FALSE	FALSE
edenitic hornblende	FALSE	FALSE	edenitic hornblende	FALSE	FALSE	FALSE	FALSE	FALSE	FALSE	FALSE	FALSE	FALSE	FALSE	FALSE	FALSE	FALSE	FALSE	FALSE	FALSE	FALSE	FALSE	FALSE	FALSE	FALSE	FALSE	FALSE	FALSE	FALSE	FALSE	FALSE	FALSE	FALSE	FALSE	FALSE	FALSE	FALSE	FALSE	FALSE	FALSE	FALSE	FALSE	FALSE	FALSE	FALSE	FALSE	FALSE	FALSE	FALSE	FALSE
ferro-edenitic hornblende	FALSE	FALSE	FALSE	FALSE	FALSE	FALSE	FALSE	FALSE	FALSE	FALSE	FALSE	FALSE	FALSE	FALSE	FALSE	FALSE	FALSE	FALSE	FALSE	FALSE	FALSE	FALSE	FALSE	FALSE	FALSE	FALSE	FALSE	FALSE	FALSE	FALSE	FALSE	FALSE	FALSE	FALSE	FALSE	FALSE	FALSE	FALSE	FALSE	FALSE	FALSE	FALSE	FALSE	FALSE	FALSE	FALSE	FALSE	FALSE	FALSE
pargasitic hornblende	FALSE	FALSE	FALSE	FALSE	FALSE	FALSE	FALSE	FALSE	FALSE	FALSE	FALSE	FALSE	FALSE	FALSE	FALSE	FALSE	FALSE	FALSE	FALSE	FALSE	FALSE	FALSE	FALSE	FALSE	FALSE	FALSE	FALSE	FALSE	FALSE	FALSE	FALSE	FALSE	FALSE	FALSE	FALSE	FALSE	FALSE	FALSE	FALSE	FALSE	FALSE	FALSE	FALSE	FALSE	FALSE	FALSE	FALSE	FALSE	FALSE
ferroan pargasitic hornblende	FALSE	FALSE	FALSE	FALSE	FALSE	FALSE	FALSE	FALSE	FALSE	FALSE	FALSE	FALSE	FALSE	FALSE	FALSE	FALSE	FALSE	FALSE	FALSE	FALSE	FALSE	FALSE	FALSE	FALSE	FALSE	FALSE	FALSE	FALSE	FALSE	FALSE	FALSE	FALSE	FALSE	FALSE	FALSE	FALSE	FALSE	FALSE	FALSE	FALSE	FALSE	FALSE	FALSE	FALSE	FALSE	FALSE	FALSE	FALSE	FALSE
ferro-pargasitic hornblende	FALSE	FALSE	FALSE	FALSE	FALSE	FALSE	FALSE	FALSE	FALSE	FALSE	FALSE	FALSE	FALSE	FALSE	FALSE	FALSE	FALSE	FALSE	FALSE	FALSE	FALSE	FALSE	FALSE	FALSE	FALSE	FALSE	FALSE	FALSE	FALSE	FALSE	FALSE	FALSE	FALSE	FALSE	FALSE	FALSE	FALSE	FALSE	FALSE	FALSE	FALSE	FALSE	FALSE	FALSE	FALSE	FALSE	FALSE	FALSE	FALSE
pargasite	FALSE	FALSE	FALSE	FALSE	FALSE	FALSE	FALSE	FALSE	FALSE	FALSE	FALSE	FALSE	FALSE	FALSE	FALSE	FALSE	FALSE	FALSE	FALSE	FALSE	FALSE	FALSE	FALSE	FALSE	FALSE	FALSE	FALSE	FALSE	FALSE	FALSE	FALSE	FALSE	FALSE	FALSE	FALSE	FALSE	FALSE	FALSE	FALSE	FALSE	FALSE	FALSE	FALSE	FALSE	FALSE	FALSE	FALSE	FALSE	FALSE
ferroan pargasite	FALSE	FALSE	FALSE	FALSE	FALSE	FALSE	FALSE	FALSE	FALSE	FALSE	FALSE	FALSE	FALSE	FALSE	FALSE	FALSE	FALSE	FALSE	FALSE	FALSE	FALSE	FALSE	FALSE	FALSE	FALSE	FALSE	FALSE	FALSE	FALSE	FALSE	FALSE	FALSE	FALSE	FALSE	FALSE	FALSE	FALSE	FALSE	FALSE	FALSE	FALSE	FALSE	FALSE	FALSE	FALSE	FALSE	FALSE	FALSE	FALSE
ferro-pargasite	FALSE	FALSE	FALSE	FALSE	FALSE	FALSE	FALSE	FALSE	FALSE	FALSE	FALSE	FALSE	FALSE	FALSE	FALSE	FALSE	FALSE	FALSE	FALSE	FALSE	FALSE	FALSE	FALSE	FALSE	FALSE	FALSE	FALSE	FALSE	FALSE	FALSE	FALSE	FALSE	FALSE	FALSE	FALSE	FALSE	FALSE	FALSE	FALSE	FALSE	FALSE	FALSE	FALSE	FALSE	FALSE	FALSE	FALSE	FALSE	FALSE
subsilicic pargasite	FALSE	FALSE	FALSE	FALSE	FALSE	FALSE	FALSE	FALSE	FALSE	FALSE	FALSE	FALSE	FALSE	FALSE	FALSE	FALSE	FALSE	FALSE	FALSE	FALSE	FALSE	FALSE	FALSE	FALSE	FALSE	FALSE	FALSE	FALSE	FALSE	FALSE	FALSE	FALSE	FALSE	FALSE	FALSE	FALSE	FALSE	FALSE	FALSE	FALSE	FALSE	FALSE	FALSE	FALSE	FALSE	FALSE	FALSE	FALSE	FALSE
subsilicic ferroan pargasite	FALSE	FALSE	FALSE	FALSE	FALSE	FALSE	FALSE	FALSE	FALSE	FALSE	FALSE	FALSE	FALSE	FALSE	FALSE	FALSE	FALSE	FALSE	FALSE	FALSE	FALSE	FALSE	FALSE	FALSE	FALSE	FALSE	FALSE	FALSE	FALSE	FALSE	FALSE	FALSE	FALSE	FALSE	FALSE	FALSE	FALSE	FALSE	FALSE	FALSE	FALSE	FALSE	FALSE	FALSE	FALSE	FALSE	FALSE	FALSE	FALSE
subsilicic ferro-pargasite	FALSE	FALSE	FALSE	FALSE	FALSE	FALSE	FALSE	FALSE	FALSE	FALSE	FALSE	FALSE	FALSE	FALSE	FALSE	FALSE	FALSE	FALSE	FALSE	FALSE	FALSE	FALSE	FALSE	FALSE	FALSE	FALSE	FALSE	FALSE	FALSE	FALSE	FALSE	FALSE	FALSE	FALSE	FALSE	FALSE	FALSE	FALSE	FALSE	FALSE	FALSE	FALSE	FALSE	FALSE	FALSE	FALSE	FALSE	FALSE	FALSE
magnesio-sadanagaite	FALSE	FALSE	FALSE	FALSE	FALSE	FALSE	FALSE	FALSE	FALSE	FALSE	FALSE	FALSE	FALSE	FALSE	FALSE	FALSE	FALSE	FALSE	FALSE	FALSE	FALSE	FALSE	FALSE	FALSE	FALSE	FALSE	FALSE	FALSE	FALSE	FALSE	FALSE	FALSE	FALSE	FALSE	FALSE	FALSE	FALSE	FALSE	FALSE	FALSE	FALSE	FALSE	FALSE	FALSE	FALSE	FALSE	FALSE	FALSE	FALSE
sadanagaite	FALSE	FALSE	FALSE	FALSE	FALSE	FALSE	FALSE	FALSE	FALSE	FALSE	FALSE	FALSE	FALSE	FALSE	FALSE	FALSE	FALSE	FALSE	FALSE	FALSE	FALSE	FALSE	FALSE	FALSE	FALSE	FALSE	FALSE	FALSE	FALSE	FALSE	FALSE	FALSE	FALSE	FALSE	FALSE	FALSE	FALSE	FALSE	FALSE	FALSE	FALSE	FALSE	FALSE	FALSE	FALSE	FALSE	FALSE	FALSE	FALSE
magnesio-hastingsitic hornblende	FALSE	FALSE	FALSE	FALSE	FALSE	FALSE	FALSE	FALSE	FALSE	FALSE	FALSE	FALSE	FALSE	FALSE	FALSE	FALSE	FALSE	FALSE	FALSE	FALSE	FALSE	FALSE	FALSE	FALSE	FALSE	FALSE	FALSE	FALSE	FALSE	FALSE	FALSE	FALSE	FALSE	FALSE	FALSE	FALSE	FALSE	FALSE	FALSE	FALSE	FALSE	FALSE	FALSE	FALSE	FALSE	FALSE	FALSE	FALSE	FALSE
magnesian hastingsitic hornblende	FALSE	FALSE	FALSE	FALSE	FALSE	FALSE	FALSE	FALSE	FALSE	FALSE	FALSE	FALSE	FALSE	FALSE	FALSE	FALSE	FALSE	FALSE	FALSE	FALSE	FALSE	FALSE	FALSE	FALSE	FALSE	FALSE	FALSE	FALSE	FALSE	FALSE	FALSE	FALSE	FALSE	FALSE	FALSE	FALSE	FALSE	FALSE	FALSE	FALSE	FALSE	FALSE	FALSE	FALSE	FALSE	FALSE	FALSE	FALSE	FALSE
hastingsitic hornblende	FALSE	FALSE	FALSE	FALSE	FALSE	FALSE	FALSE	FALSE	FALSE	FALSE	FALSE	FALSE	FALSE	FALSE	FALSE	FALSE	FALSE	FALSE	FALSE	FALSE	FALSE	FALSE	FALSE	FALSE	FALSE	FALSE	FALSE	FALSE	FALSE	FALSE	FALSE	FALSE	FALSE	FALSE	FALSE	FALSE	FALSE	FALSE	FALSE	FALSE	FALSE	FALSE	FALSE	FALSE	FALSE	FALSE	FALSE	FALSE	FALSE
magnesio-hastingsite	FALSE	FALSE	FALSE	FALSE	FALSE	FALSE	FALSE	FALSE	FALSE	FALSE	FALSE	FALSE	FALSE	FALSE	FALSE	FALSE	FALSE	FALSE	FALSE	FALSE	FALSE	FALSE	FALSE	FALSE	FALSE	FALSE	FALSE	FALSE	FALSE	FALSE	FALSE	FALSE	FALSE	FALSE	FALSE	FALSE	FALSE	FALSE	FALSE	FALSE	FALSE	FALSE	FALSE	FALSE	FALSE	FALSE	FALSE	FALSE	FALSE
magnesian hastingsite	FALSE	FALSE	FALSE	FALSE	FALSE	FALSE	FALSE	FALSE	FALSE	FALSE	FALSE	FALSE	FALSE	FALSE	FALSE	FALSE	FALSE	FALSE	FALSE	FALSE	FALSE	FALSE	FALSE	FALSE	FALSE	FALSE	FALSE	FALSE	FALSE	FALSE	FALSE	FALSE	FALSE	FALSE	FALSE	FALSE	FALSE	FALSE	FALSE	FALSE	FALSE	FALSE	FALSE	FALSE	FALSE	FALSE	FALSE	FALSE	FALSE
hastingsite	FALSE	FALSE	FALSE	FALSE	FALSE	FALSE	FALSE	FALSE	FALSE	FALSE	FALSE	FALSE	FALSE	FALSE	FALSE	FALSE	FALSE	FALSE	FALSE	FALSE	FALSE	FALSE	FALSE	FALSE	FALSE	FALSE	FALSE	FALSE	FALSE	FALSE	FALSE	FALSE	FALSE	FALSE	FALSE	FALSE	FALSE	FALSE	FALSE	FALSE	FALSE	FALSE	FALSE	FALSE	FALSE	FALSE	FALSE	FALSE	FALSE
subsilicic magnesio-hastingsite	FALSE	FALSE	FALSE	FALSE	FALSE	FALSE	FALSE	FALSE	FALSE	FALSE	FALSE	FALSE	FALSE	FALSE	FALSE	FALSE	FALSE	FALSE	FALSE	FALSE	FALSE	FALSE	FALSE	FALSE	FALSE	FALSE	FALSE	FALSE	FALSE	FALSE	FALSE	FALSE	FALSE	FALSE	FALSE	FALSE	FALSE	FALSE	FALSE	FALSE	FALSE	FALSE	FALSE	FALSE	FALSE	FALSE	FALSE	FALSE	FALSE
subsilicic magnesian hastingsite	FALSE	FALSE	FALSE	FALSE	FALSE	FALSE	FALSE	FALSE	FALSE	FALSE	FALSE	FALSE	FALSE	FALSE	FALSE	FALSE	FALSE	FALSE	FALSE	FALSE	FALSE	FALSE	FALSE	FALSE	FALSE	FALSE	FALSE	FALSE	FALSE	FALSE	FALSE	FALSE	FALSE	FALSE	FALSE	FALSE	FALSE	FALSE	FALSE	FALSE	FALSE	FALSE	FALSE	FALSE	FALSE	FALSE	FALSE	FALSE	FALSE
subsilicic hastingsite	FALSE	FALSE	FALSE	FALSE	FALSE	FALSE	FALSE	FALSE	FALSE	FALSE	FALSE	FALSE	FALSE	FALSE	FALSE	FALSE	FALSE	FALSE	FALSE	FALSE	FALSE	FALSE	FALSE	FALSE	FALSE	FALSE	FALSE	FALSE	FALSE	FALSE	FALSE	FALSE	FALSE	FALSE	FALSE	FALSE	FALSE	FALSE	FALSE	FALSE	FALSE	FALSE	FALSE	FALSE	FALSE	FALSE	FALSE	FALSE	FALSE
kaersutite	FALSE	FALSE	FALSE	FALSE	FALSE	FALSE	FALSE	FALSE	FALSE	FALSE	FALSE	FALSE	FALSE	FALSE	FALSE	FALSE	FALSE	FALSE	FALSE	FALSE	FALSE	FALSE	FALSE	FALSE	FALSE	FALSE	FALSE	FALSE	FALSE	FALSE	FALSE	FALSE	FALSE	FALSE	FALSE	FALSE	FALSE	FALSE	FALSE	FALSE	FALSE	FALSE	FALSE	FALSE	FALSE	FALSE	FALSE	FALSE	FALSE
ferro-kaersutite	FALSE	FALSE	FALSE	FALSE	FALSE	FALSE	FALSE	FALSE	FALSE	FALSE	FALSE	FALSE	FALSE	FALSE	FALSE	FALSE	FALSE	FALSE	FALSE	FALSE	FALSE	FALSE	FALSE	FALSE	FALSE	FALSE	FALSE	FALSE	FALSE	FALSE	FALSE	FALSE	FALSE	FALSE	FALSE	FALSE	FALSE	FALSE	FALSE	FALSE	FALSE	FALSE	FALSE	FALSE	FALSE	FALSE	FALSE	FALSE	FALSE
subsilicic kaersutite	FALSE	FALSE	FALSE	FALSE	FALSE	FALSE	FALSE	FALSE	FALSE	FALSE	FALSE	FALSE	FALSE	FALSE	FALSE	FALSE	FALSE	FALSE	FALSE	FALSE	FALSE	FALSE	FALSE	FALSE	FALSE	FALSE	FALSE	FALSE	FALSE	FALSE	FALSE	FALSE	FALSE	FALSE	FALSE	FALSE	FALSE	FALSE	FALSE	FALSE	FALSE	FALSE	FALSE	FALSE	FALSE	FALSE	FALSE	FALSE	FALSE
subsilicic ferro-kaersutite	FALSE	FALSE	FALSE	FALSE	FALSE	FALSE	FALSE	FALSE	FALSE	FALSE	FALSE	FALSE	FALSE	FALSE	FALSE	FALSE	FALSE	FALSE	FALSE	FALSE	FALSE	FALSE	FALSE	FALSE	FALSE	FALSE	FALSE	FALSE	FALSE	FALSE	FALSE	FALSE	FALSE	FALSE	FALSE	FALSE	FALSE	FALSE	FALSE	FALSE	FALSE	FALSE	FALSE	FALSE	FALSE	FALSE	FALSE	FALSE	FALSE
magnesio-anthophyllite	magnesio-anthophyllite	FALSE	FALSE	FALSE	FALSE	magnesio-anthophyllite	magnesio-anthophyllite	magnesio-anthophyllite	magnesio-anthophyllite	magnesio-anthophyllite	magnesio-anthophyllite	magnesio-anthophyllite	magnesio-anthophyllite	magnesio-anthophyllite	magnesio-anthophyllite	magnesio-anthophyllite	magnesio-anthophyllite	magnesio-anthophyllite	magnesio-anthophyllite	magnesio-anthophyllite	magnesio-anthophyllite	magnesio-anthophyllite	magnesio-anthophyllite	magnesio-anthophyllite	magnesio-anthophyllite	magnesio-anthophyllite	magnesio-anthophyllite	magnesio-anthophyllite	magnesio-anthophyllite	magnesio-anthophyllite	magnesio-anthophyllite	magnesio-anthophyllite	magnesio-anthophyllite	magnesio-anthophyllite	magnesio-anthophyllite	magnesio-anthophyllite	magnesio-anthophyllite	magnesio-anthophyllite	magnesio-anthophyllite	magnesio-anthophyllite	magnesio-anthophyllite	magnesio-anthophyllite	magnesio-anthophyllite	magnesio-anthophyllite	magnesio-anthophyllite	magnesio-anthophyllite	magnesio-anthophyllite	magnesio-anthophyllite	magnesio-anthophyllite
anthophyllite	FALSE	anthophyllite	FALSE	anthophyllite	anthophyllite	FALSE	FALSE	FALSE	FALSE	FALSE	FALSE	FALSE	FALSE	FALSE	FALSE	FALSE	FALSE	FALSE	FALSE	FALSE	FALSE	FALSE	FALSE	FALSE	FALSE	FALSE	FALSE	FALSE	FALSE	FALSE	FALSE	FALSE	FALSE	FALSE	FALSE	FALSE	FALSE	FALSE	FALSE	FALSE	FALSE	FALSE	FALSE	FALSE	FALSE	FALSE	FALSE	FALSE	FALSE
ferro-anthophyllite	FALSE	FALSE	FALSE	FALSE	FALSE	FALSE	FALSE	FALSE	FALSE	FALSE	FALSE	FALSE	FALSE	FALSE	FALSE	FALSE	FALSE	FALSE	FALSE	FALSE	FALSE	FALSE	FALSE	FALSE	FALSE	FALSE	FALSE	FALSE	FALSE	FALSE	FALSE	FALSE	FALSE	FALSE	FALSE	FALSE	FALSE	FALSE	FALSE	FALSE	FALSE	FALSE	FALSE	FALSE	FALSE	FALSE	FALSE	FALSE	FALSE
magnesio-gedrite	FALSE	FALSE	magnesio-gedrite	FALSE	FALSE	FALSE	FALSE	FALSE	FALSE	FALSE	FALSE	FALSE	FALSE	FALSE	FALSE	FALSE	FALSE	FALSE	FALSE	FALSE	FALSE	FALSE	FALSE	FALSE	FALSE	FALSE	FALSE	FALSE	FALSE	FALSE	FALSE	FALSE	FALSE	FALSE	FALSE	FALSE	FALSE	FALSE	FALSE	FALSE	FALSE	FALSE	FALSE	FALSE	FALSE	FALSE	FALSE	FALSE	FALSE
gedrite	FALSE	FALSE	FALSE	FALSE	FALSE	FALSE	FALSE	FALSE	FALSE	FALSE	FALSE	FALSE	FALSE	FALSE	FALSE	FALSE	FALSE	FALSE	FALSE	FALSE	FALSE	FALSE	FALSE	FALSE	FALSE	FALSE	FALSE	FALSE	FALSE	FALSE	FALSE	FALSE	FALSE	FALSE	FALSE	FALSE	FALSE	FALSE	FALSE	FALSE	FALSE	FALSE	FALSE	FALSE	FALSE	FALSE	FALSE	FALSE	FALSE
ferro-gedrite	FALSE	FALSE	FALSE	FALSE	FALSE	FALSE	FALSE	FALSE	FALSE	FALSE	FALSE	FALSE	FALSE	FALSE	FALSE	FALSE	FALSE	FALSE	FALSE	FALSE	FALSE	FALSE	FALSE	FALSE	FALSE	FALSE	FALSE	FALSE	FALSE	FALSE	FALSE	FALSE	FALSE	FALSE	FALSE	FALSE	FALSE	FALSE	FALSE	FALSE	FALSE	FALSE	FALSE	FALSE	FALSE	FALSE	FALSE	FALSE	FALSE
magnesio-cummingtonite	magnesio-cummingtonite	FALSE	magnesio-cummingtonite	FALSE	FALSE	magnesio-cummingtonite	magnesio-cummingtonite	magnesio-cummingtonite	magnesio-cummingtonite	magnesio-cummingtonite	magnesio-cummingtonite	magnesio-cummingtonite	magnesio-cummingtonite	magnesio-cummingtonite	magnesio-cummingtonite	magnesio-cummingtonite	magnesio-cummingtonite	magnesio-cummingtonite	magnesio-cummingtonite	magnesio-cummingtonite	magnesio-cummingtonite	magnesio-cummingtonite	magnesio-cummingtonite	magnesio-cummingtonite	magnesio-cummingtonite	magnesio-cummingtonite	magnesio-cummingtonite	magnesio-cummingtonite	magnesio-cummingtonite	magnesio-cummingtonite	magnesio-cummingtonite	magnesio-cummingtonite	magnesio-cummingtonite	magnesio-cummingtonite	magnesio-cummingtonite	magnesio-cummingtonite	magnesio-cummingtonite	magnesio-cummingtonite	magnesio-cummingtonite	magnesio-cummingtonite	magnesio-cummingtonite	magnesio-cummingtonite	magnesio-cummingtonite	magnesio-cummingtonite	magnesio-cummingtonite	magnesio-cummingtonite	magnesio-cummingtonite	magnesio-cummingtonite	magnesio-cummingtonite
cummingtonite	FALSE	cummingtonite	FALSE	FALSE	FALSE	FALSE	FALSE	FALSE	FALSE	FALSE	FALSE	FALSE	FALSE	FALSE	FALSE	FALSE	FALSE	FALSE	FALSE	FALSE	FALSE	FALSE	FALSE	FALSE	FALSE	FALSE	FALSE	FALSE	FALSE	FALSE	FALSE	FALSE	FALSE	FALSE	FALSE	FALSE	FALSE	FALSE	FALSE	FALSE	FALSE	FALSE	FALSE	FALSE	FALSE	FALSE	FALSE	FALSE	FALSE
grunerite	FALSE	FALSE	FALSE	FALSE	FALSE	FALSE	FALSE	FALSE	FALSE	FALSE	FALSE	FALSE	FALSE	FALSE	FALSE	FALSE	FALSE	FALSE	FALSE	FALSE	FALSE	FALSE	FALSE	FALSE	FALSE	FALSE	FALSE	FALSE	FALSE	FALSE	FALSE	FALSE	FALSE	FALSE	FALSE	FALSE	FALSE	FALSE	FALSE	FALSE	FALSE	FALSE	FALSE	FALSE	FALSE	FALSE	FALSE	FALSE	FALSE
dannemoreite	FALSE	FALSE	FALSE	dannemoreite	FALSE	FALSE	FALSE	FALSE	FALSE	FALSE	FALSE	FALSE	FALSE	FALSE	FALSE	FALSE	FALSE	FALSE	FALSE	FALSE	FALSE	FALSE	FALSE	FALSE	FALSE	FALSE	FALSE	FALSE	FALSE	FALSE	FALSE	FALSE	FALSE	FALSE	FALSE	FALSE	FALSE	FALSE	FALSE	FALSE	FALSE	FALSE	FALSE	FALSE	FALSE	FALSE	FALSE	FALSE	FALSE
tirodite	FALSE	FALSE	FALSE	FALSE	tirodite	FALSE	FALSE	FALSE	FALSE	FALSE	FALSE	FALSE	FALSE	FALSE	FALSE	FALSE	FALSE	FALSE	FALSE	FALSE	FALSE	FALSE	FALSE	FALSE	FALSE	FALSE	FALSE	FALSE	FALSE	FALSE	FALSE	FALSE	FALSE	FALSE	FALSE	FALSE	FALSE	FALSE	FALSE	FALSE	FALSE	FALSE	FALSE	FALSE	FALSE	FALSE	FALSE	FALSE	FALSE
winchite	winchite	winchite	FALSE	FALSE	winchite	winchite	winchite	winchite	winchite	winchite	winchite	winchite	winchite	winchite	winchite	winchite	winchite	winchite	winchite	winchite	winchite	winchite	winchite	winchite	winchite	winchite	winchite	winchite	winchite	winchite	winchite	winchite	winchite	winchite	winchite	winchite	winchite	winchite	winchite	winchite	winchite	winchite	winchite	winchite	winchite	winchite	winchite	winchite	winchite
ferro-winchite	FALSE	FALSE	FALSE	ferro-winchite	FALSE	FALSE	FALSE	FALSE	FALSE	FALSE	FALSE	FALSE	FALSE	FALSE	FALSE	FALSE	FALSE	FALSE	FALSE	FALSE	FALSE	FALSE	FALSE	FALSE	FALSE	FALSE	FALSE	FALSE	FALSE	FALSE	FALSE	FALSE	FALSE	FALSE	FALSE	FALSE	FALSE	FALSE	FALSE	FALSE	FALSE	FALSE	FALSE	FALSE	FALSE	FALSE	FALSE	FALSE	FALSE
barroisite	FALSE	FALSE	barroisite	FALSE	FALSE	FALSE	FALSE	FALSE	FALSE	FALSE	FALSE	FALSE	FALSE	FALSE	FALSE	FALSE	FALSE	FALSE	FALSE	FALSE	FALSE	FALSE	FALSE	FALSE	FALSE	FALSE	FALSE	FALSE	FALSE	FALSE	FALSE	FALSE	FALSE	FALSE	FALSE	FALSE	FALSE	FALSE	FALSE	FALSE	FALSE	FALSE	FALSE	FALSE	FALSE	FALSE	FALSE	FALSE	FALSE
ferro-barroisite	FALSE	FALSE	FALSE	FALSE	FALSE	FALSE	FALSE	FALSE	FALSE	FALSE	FALSE	FALSE	FALSE	FALSE	FALSE	FALSE	FALSE	FALSE	FALSE	FALSE	FALSE	FALSE	FALSE	FALSE	FALSE	FALSE	FALSE	FALSE	FALSE	FALSE	FALSE	FALSE	FALSE	FALSE	FALSE	FALSE	FALSE	FALSE	FALSE	FALSE	FALSE	FALSE	FALSE	FALSE	FALSE	FALSE	FALSE	FALSE	FALSE
richterite	richterite	richterite	FALSE	FALSE	richterite	richterite	richterite	richterite	richterite	richterite	richterite	richterite	richterite	richterite	richterite	richterite	richterite	richterite	richterite	richterite	richterite	richterite	richterite	richterite	richterite	richterite	richterite	richterite	richterite	richterite	richterite	richterite	richterite	richterite	richterite	richterite	richterite	richterite	richterite	richterite	richterite	richterite	richterite	richterite	richterite	richterite	richterite	richterite	richterite
ferro-richterite	FALSE	FALSE	FALSE	ferro-richterite	FALSE	FALSE	FALSE	FALSE	FALSE	FALSE	FALSE	FALSE	FALSE	FALSE	FALSE	FALSE	FALSE	FALSE	FALSE	FALSE	FALSE	FALSE	FALSE	FALSE	FALSE	FALSE	FALSE	FALSE	FALSE	FALSE	FALSE	FALSE	FALSE	FALSE	FALSE	FALSE	FALSE	FALSE	FALSE	FALSE	FALSE	FALSE	FALSE	FALSE	FALSE	FALSE	FALSE	FALSE	FALSE
magnesio-kataphorite	FALSE	FALSE	magnesio-kataphorite	FALSE	FALSE	FALSE	FALSE	FALSE	FALSE	FALSE	FALSE	FALSE	FALSE	FALSE	FALSE	FALSE	FALSE	FALSE	FALSE	FALSE	FALSE	FALSE	FALSE	FALSE	FALSE	FALSE	FALSE	FALSE	FALSE	FALSE	FALSE	FALSE	FALSE	FALSE	FALSE	FALSE	FALSE	FALSE	FALSE	FALSE	FALSE	FALSE	FALSE	FALSE	FALSE	FALSE	FALSE	FALSE	FALSE
katophorite	FALSE	FALSE	FALSE	FALSE	FALSE	FALSE	FALSE	FALSE	FALSE	FALSE	FALSE	FALSE	FALSE	FALSE	FALSE	FALSE	FALSE	FALSE	FALSE	FALSE	FALSE	FALSE	FALSE	FALSE	FALSE	FALSE	FALSE	FALSE	FALSE	FALSE	FALSE	FALSE	FALSE	FALSE	FALSE	FALSE	FALSE	FALSE	FALSE	FALSE	FALSE	FALSE	FALSE	FALSE	FALSE	FALSE	FALSE	FALSE	FALSE
magnesio-taramite	FALSE	FALSE	FALSE	FALSE	FALSE	FALSE	FALSE	FALSE	FALSE	FALSE	FALSE	FALSE	FALSE	FALSE	FALSE	FALSE	FALSE	FALSE	FALSE	FALSE	FALSE	FALSE	FALSE	FALSE	FALSE	FALSE	FALSE	FALSE	FALSE	FALSE	FALSE	FALSE	FALSE	FALSE	FALSE	FALSE	FALSE	FALSE	FALSE	FALSE	FALSE	FALSE	FALSE	FALSE	FALSE	FALSE	FALSE	FALSE	FALSE
taramite	FALSE	FALSE	FALSE	FALSE	FALSE	FALSE	FALSE	FALSE	FALSE	FALSE	FALSE	FALSE	FALSE	FALSE	FALSE	FALSE	FALSE	FALSE	FALSE	FALSE	FALSE	FALSE	FALSE	FALSE	FALSE	FALSE	FALSE	FALSE	FALSE	FALSE	FALSE	FALSE	FALSE	FALSE	FALSE	FALSE	FALSE	FALSE	FALSE	FALSE	FALSE	FALSE	FALSE	FALSE	FALSE	FALSE	FALSE	FALSE	FALSE
ferro-eckermannite	FALSE	FALSE	FALSE	FALSE	FALSE	FALSE	FALSE	FALSE	FALSE	FALSE	FALSE	FALSE	FALSE	FALSE	FALSE	FALSE	FALSE	FALSE	FALSE	FALSE	FALSE	FALSE	FALSE	FALSE	FALSE	FALSE	FALSE	FALSE	FALSE	FALSE	FALSE	FALSE	FALSE	FALSE	FALSE	FALSE	FALSE	FALSE	FALSE	FALSE	FALSE	FALSE	FALSE	FALSE	FALSE	FALSE	FALSE	FALSE	FALSE
eckermannite	eckermannite	eckermannite	eckermannite	FALSE	eckermannite	FALSE	FALSE	FALSE	FALSE	eckermannite	FALSE	FALSE	FALSE	FALSE	FALSE	FALSE	FALSE	FALSE	FALSE	FALSE	FALSE	FALSE	FALSE	FALSE	FALSE	FALSE	FALSE	FALSE	FALSE	FALSE	FALSE	FALSE	FALSE	FALSE	FALSE	FALSE	FALSE	FALSE	FALSE	FALSE	FALSE	FALSE	FALSE	FALSE	FALSE	FALSE	FALSE	FALSE	FALSE
arfvedsonite	FALSE	FALSE	FALSE	arfvedsonite	FALSE	FALSE	FALSE	FALSE	FALSE	FALSE	FALSE	FALSE	FALSE	FALSE	FALSE	FALSE	FALSE	FALSE	FALSE	FALSE	FALSE	FALSE	FALSE	FALSE	FALSE	FALSE	FALSE	FALSE	FALSE	FALSE	FALSE	FALSE	FALSE	FALSE	FALSE	FALSE	FALSE	FALSE	FALSE	FALSE	FALSE	FALSE	FALSE	FALSE	FALSE	FALSE	FALSE	FALSE	FALSE
kozulite	FALSE	FALSE	FALSE	FALSE	FALSE	FALSE	FALSE	FALSE	FALSE	FALSE	FALSE	FALSE	FALSE	FALSE	FALSE	FALSE	FALSE	FALSE	FALSE	FALSE	FALSE	FALSE	FALSE	FALSE	FALSE	FALSE	FALSE	FALSE	FALSE	FALSE	FALSE	FALSE	FALSE	FALSE	FALSE	FALSE	FALSE	FALSE	FALSE	FALSE	FALSE	FALSE	FALSE	FALSE	FALSE	FALSE	FALSE	FALSE	FALSE
magnesio-arfvedsonite	FALSE	FALSE	FALSE	FALSE	FALSE	magnesio-arfvedsonite	magnesio-arfvedsonite	magnesio-arfvedsonite	magnesio-arfvedsonite	FALSE	magnesio-arfvedsonite	magnesio-arfvedsonite	magnesio-arfvedsonite	magnesio-arfvedsonite	magnesio-arfvedsonite	magnesio-arfvedsonite	magnesio-arfvedsonite	magnesio-arfvedsonite	magnesio-arfvedsonite	magnesio-arfvedsonite	magnesio-arfvedsonite	magnesio-arfvedsonite	magnesio-arfvedsonite	magnesio-arfvedsonite	magnesio-arfvedsonite	magnesio-arfvedsonite	magnesio-arfvedsonite	magnesio-arfvedsonite	magnesio-arfvedsonite	magnesio-arfvedsonite	magnesio-arfvedsonite	magnesio-arfvedsonite	magnesio-arfvedsonite	magnesio-arfvedsonite	magnesio-arfvedsonite	magnesio-arfvedsonite	magnesio-arfvedsonite	magnesio-arfvedsonite	magnesio-arfvedsonite	magnesio-arfvedsonite	magnesio-arfvedsonite	magnesio-arfvedsonite	magnesio-arfvedsonite	magnesio-arfvedsonite	magnesio-arfvedsonite	magnesio-arfvedsonite	magnesio-arfvedsonite	magnesio-arfvedsonite	magnesio-arfvedsonite
ferro-glaucophane	FALSE	FALSE	FALSE	FALSE	FALSE	FALSE	FALSE	FALSE	FALSE	FALSE	FALSE	FALSE	FALSE	FALSE	FALSE	FALSE	FALSE	FALSE	FALSE	FALSE	FALSE	FALSE	FALSE	FALSE	FALSE	FALSE	FALSE	FALSE	FALSE	FALSE	FALSE	FALSE	FALSE	FALSE	FALSE	FALSE	FALSE	FALSE	FALSE	FALSE	FALSE	FALSE	FALSE	FALSE	FALSE	FALSE	FALSE	FALSE	FALSE
glaucophane	glaucophane	glaucophane	glaucophane	FALSE	glaucophane	FALSE	FALSE	FALSE	FALSE	glaucophane	FALSE	FALSE	FALSE	FALSE	FALSE	FALSE	FALSE	FALSE	FALSE	FALSE	FALSE	FALSE	FALSE	FALSE	FALSE	FALSE	FALSE	FALSE	FALSE	FALSE	FALSE	FALSE	FALSE	FALSE	FALSE	FALSE	FALSE	FALSE	FALSE	FALSE	FALSE	FALSE	FALSE	FALSE	FALSE	FALSE	FALSE	FALSE	FALSE
crossite	FALSE	FALSE	FALSE	FALSE	FALSE	crossite	FALSE	FALSE	FALSE	FALSE	FALSE	FALSE	FALSE	FALSE	FALSE	FALSE	FALSE	FALSE	FALSE	FALSE	FALSE	FALSE	FALSE	FALSE	FALSE	FALSE	FALSE	FALSE	FALSE	FALSE	FALSE	FALSE	FALSE	FALSE	FALSE	FALSE	FALSE	FALSE	FALSE	FALSE	FALSE	FALSE	FALSE	FALSE	FALSE	FALSE	FALSE	FALSE	FALSE
riebeckite	FALSE	FALSE	FALSE	riebeckite	FALSE	FALSE	FALSE	FALSE	FALSE	FALSE	FALSE	FALSE	FALSE	FALSE	FALSE	FALSE	FALSE	FALSE	FALSE	FALSE	FALSE	FALSE	FALSE	FALSE	FALSE	FALSE	FALSE	FALSE	FALSE	FALSE	FALSE	FALSE	FALSE	FALSE	FALSE	FALSE	FALSE	FALSE	FALSE	FALSE	FALSE	FALSE	FALSE	FALSE	FALSE	FALSE	FALSE	FALSE	FALSE
magnesio-riebeckite	FALSE	FALSE	FALSE	FALSE	FALSE	FALSE	magnesio-riebeckite	magnesio-riebeckite	magnesio-riebeckite	FALSE	magnesio-riebeckite	magnesio-riebeckite	magnesio-riebeckite	magnesio-riebeckite	magnesio-riebeckite	magnesio-riebeckite	magnesio-riebeckite	magnesio-riebeckite	magnesio-riebeckite	magnesio-riebeckite	magnesio-riebeckite	magnesio-riebeckite	magnesio-riebeckite	magnesio-riebeckite	magnesio-riebeckite	magnesio-riebeckite	magnesio-riebeckite	magnesio-riebeckite	magnesio-riebeckite	magnesio-riebeckite	magnesio-riebeckite	magnesio-riebeckite	magnesio-riebeckite	magnesio-riebeckite	magnesio-riebeckite	magnesio-riebeckite	magnesio-riebeckite	magnesio-riebeckite	magnesio-riebeckite	magnesio-riebeckite	magnesio-riebeckite	magnesio-riebeckite	magnesio-riebeckite	magnesio-riebeckite	magnesio-riebeckite	magnesio-riebeckite	magnesio-riebeckite	magnesio-riebeckite	magnesio-riebeckite
ferro-nyboite	FALSE	FALSE	FALSE	FALSE	FALSE	FALSE	FALSE	FALSE	FALSE	FALSE	FALSE	FALSE	FALSE	FALSE	FALSE	FALSE	FALSE	FALSE	FALSE	FALSE	FALSE	FALSE	FALSE	FALSE	FALSE	FALSE	FALSE	FALSE	FALSE	FALSE	FALSE	FALSE	FALSE	FALSE	FALSE	FALSE	FALSE	FALSE	FALSE	FALSE	FALSE	FALSE	FALSE	FALSE	FALSE	FALSE	FALSE	FALSE	FALSE
nyboite	nyboite	nyboite	nyboite	FALSE	nyboite	FALSE	FALSE	FALSE	FALSE	nyboite	FALSE	FALSE	FALSE	FALSE	FALSE	FALSE	FALSE	FALSE	FALSE	FALSE	FALSE	FALSE	FALSE	FALSE	FALSE	FALSE	FALSE	FALSE	FALSE	FALSE	FALSE	FALSE	FALSE	FALSE	FALSE	FALSE	FALSE	FALSE	FALSE	FALSE	FALSE	FALSE	FALSE	FALSE	FALSE	FALSE	FALSE	FALSE	FALSE
ferro-anophorite	FALSE	FALSE	FALSE	ferro-anophorite	FALSE	FALSE	FALSE	FALSE	FALSE	FALSE	FALSE	FALSE	FALSE	FALSE	FALSE	FALSE	FALSE	FALSE	FALSE	FALSE	FALSE	FALSE	FALSE	FALSE	FALSE	FALSE	FALSE	FALSE	FALSE	FALSE	FALSE	FALSE	FALSE	FALSE	FALSE	FALSE	FALSE	FALSE	FALSE	FALSE	FALSE	FALSE	FALSE	FALSE	FALSE	FALSE	FALSE	FALSE	FALSE
anophorite	FALSE	FALSE	FALSE	FALSE	FALSE	anophorite	anophorite	anophorite	anophorite	FALSE	anophorite	anophorite	anophorite	anophorite	anophorite	anophorite	anophorite	anophorite	anophorite	anophorite	anophorite	anophorite	anophorite	anophorite	anophorite	anophorite	anophorite	anophorite	anophorite	anophorite	anophorite	anophorite	anophorite	anophorite	anophorite	anophorite	anophorite	anophorite	anophorite	anophorite	anophorite	anophorite	anophorite	anophorite	anophorite	anophorite	anophorite	anophorite	anophorite
Part 11. Find correct amphibole group
Ca amphibole ?	FALSE	FALSE	FALSE	FALSE	FALSE	FALSE	FALSE	FALSE	FALSE	FALSE	FALSE	FALSE	FALSE	FALSE	FALSE	Ca	Ca	FALSE	FALSE	FALSE	FALSE	FALSE	FALSE	FALSE	FALSE	FALSE	FALSE	FALSE	FALSE	FALSE	FALSE	FALSE	FALSE	FALSE	FALSE	FALSE	FALSE	FALSE	FALSE	FALSE	FALSE	FALSE	FALSE	FALSE	FALSE	FALSE	FALSE	FALSE	FALSE
Fe-Mg-Mn amph ?	Fe-Mg-Mn	Fe-Mg-Mn	Fe-Mg-Mn	Fe-Mg-Mn	Fe-Mg-Mn	FALSE	FALSE	FALSE	FALSE	FALSE	FALSE	FALSE	FALSE	FALSE	FALSE	FALSE	FALSE	FALSE	FALSE	FALSE	FALSE	FALSE	FALSE	FALSE	FALSE	FALSE	FALSE	FALSE	FALSE	FALSE	FALSE	FALSE	FALSE	FALSE	FALSE	FALSE	FALSE	FALSE	FALSE	FALSE	FALSE	FALSE	FALSE	FALSE	FALSE	FALSE	FALSE	FALSE	FALSE
Na-Ca amph ?	FALSE	FALSE	FALSE	FALSE	FALSE	Na-Ca	Na-Ca	Na-Ca	Na-Ca	Na-Ca	Na-Ca	Na-Ca	Na-Ca	Na-Ca	Na-Ca	FALSE	FALSE	Na-Ca	Na-Ca	Na-Ca	Na-Ca	Na-Ca	Na-Ca	Na-Ca	Na-Ca	Na-Ca	Na-Ca	Na-Ca	Na-Ca	Na-Ca	Na-Ca	Na-Ca	Na-Ca	Na-Ca	Na-Ca	Na-Ca	Na-Ca	Na-Ca	Na-Ca	Na-Ca	Na-Ca	Na-Ca	Na-Ca	Na-Ca	Na-Ca	Na-Ca	Na-Ca	Na-Ca	Na-Ca
Alkali amph ?	FALSE	FALSE	FALSE	FALSE	FALSE	FALSE	FALSE	FALSE	FALSE	FALSE	FALSE	FALSE	FALSE	FALSE	FALSE	FALSE	FALSE	FALSE	FALSE	FALSE	FALSE	FALSE	FALSE	FALSE	FALSE	FALSE	FALSE	FALSE	FALSE	FALSE	FALSE	FALSE	FALSE	FALSE	FALSE	FALSE	FALSE	FALSE	FALSE	FALSE	FALSE	FALSE	FALSE	FALSE	FALSE	FALSE	FALSE	FALSE	FALSE
Which amph group ?	Fe-Mg-Mn	Fe-Mg-Mn	Fe-Mg-Mn	Fe-Mg-Mn	Fe-Mg-Mn	Na-Ca	Na-Ca	Na-Ca	Na-Ca	Na-Ca	Na-Ca	Na-Ca	Na-Ca	Na-Ca	Na-Ca	Ca	Ca	Na-Ca	Na-Ca	Na-Ca	Na-Ca	Na-Ca	Na-Ca	Na-Ca	Na-Ca	Na-Ca	Na-Ca	Na-Ca	Na-Ca	Na-Ca	Na-Ca	Na-Ca	Na-Ca	Na-Ca	Na-Ca	Na-Ca	Na-Ca	Na-Ca	Na-Ca	Na-Ca	Na-Ca	Na-Ca	Na-Ca	Na-Ca	Na-Ca	Na-Ca	Na-Ca	Na-Ca	Na-Ca
Part 12. Select TRUE name on each diagram
Ca diagram 1	tremoliteЛОЖЬЛОЖЬЛОЖЬЛОЖЬЛОЖЬЛОЖЬЛОЖЬЛОЖЬЛОЖЬЛОЖЬЛОЖЬЛОЖЬЛОЖЬ	ЛОЖЬactinoliteЛОЖЬЛОЖЬЛОЖЬЛОЖЬЛОЖЬЛОЖЬЛОЖЬЛОЖЬЛОЖЬЛОЖЬЛОЖЬЛОЖЬ	ЛОЖЬЛОЖЬЛОЖЬЛОЖЬЛОЖЬЛОЖЬmagnesio-hornblendeЛОЖЬЛОЖЬЛОЖЬЛОЖЬЛОЖЬЛОЖЬЛОЖЬ	ЛОЖЬЛОЖЬferro-actinoliteЛОЖЬЛОЖЬЛОЖЬЛОЖЬЛОЖЬЛОЖЬЛОЖЬЛОЖЬЛОЖЬЛОЖЬЛОЖЬ	ЛОЖЬactinoliteЛОЖЬЛОЖЬЛОЖЬЛОЖЬЛОЖЬЛОЖЬЛОЖЬЛОЖЬЛОЖЬЛОЖЬЛОЖЬЛОЖЬ	tremoliteЛОЖЬЛОЖЬЛОЖЬЛОЖЬЛОЖЬЛОЖЬЛОЖЬЛОЖЬЛОЖЬЛОЖЬЛОЖЬЛОЖЬЛОЖЬ	tremoliteЛОЖЬЛОЖЬЛОЖЬЛОЖЬЛОЖЬЛОЖЬЛОЖЬЛОЖЬЛОЖЬЛОЖЬЛОЖЬЛОЖЬЛОЖЬ	tremoliteЛОЖЬЛОЖЬЛОЖЬЛОЖЬЛОЖЬЛОЖЬЛОЖЬЛОЖЬЛОЖЬЛОЖЬЛОЖЬЛОЖЬЛОЖЬ	tremoliteЛОЖЬЛОЖЬЛОЖЬЛОЖЬЛОЖЬЛОЖЬЛОЖЬЛОЖЬЛОЖЬЛОЖЬЛОЖЬЛОЖЬЛОЖЬ	tremoliteЛОЖЬЛОЖЬЛОЖЬЛОЖЬЛОЖЬЛОЖЬЛОЖЬЛОЖЬЛОЖЬЛОЖЬЛОЖЬЛОЖЬЛОЖЬ	tremoliteЛОЖЬЛОЖЬЛОЖЬЛОЖЬЛОЖЬЛОЖЬЛОЖЬЛОЖЬЛОЖЬЛОЖЬЛОЖЬЛОЖЬЛОЖЬ	tremoliteЛОЖЬЛОЖЬЛОЖЬЛОЖЬЛОЖЬЛОЖЬЛОЖЬЛОЖЬЛОЖЬЛОЖЬЛОЖЬЛОЖЬЛОЖЬ	tremoliteЛОЖЬЛОЖЬЛОЖЬЛОЖЬЛОЖЬЛОЖЬЛОЖЬЛОЖЬЛОЖЬЛОЖЬЛОЖЬЛОЖЬЛОЖЬ	tremoliteЛОЖЬЛОЖЬЛОЖЬЛОЖЬЛОЖЬЛОЖЬЛОЖЬЛОЖЬЛОЖЬЛОЖЬЛОЖЬЛОЖЬЛОЖЬ	tremoliteЛОЖЬЛОЖЬЛОЖЬЛОЖЬЛОЖЬЛОЖЬЛОЖЬЛОЖЬЛОЖЬЛОЖЬЛОЖЬЛОЖЬЛОЖЬ	tremoliteЛОЖЬЛОЖЬЛОЖЬЛОЖЬЛОЖЬЛОЖЬЛОЖЬЛОЖЬЛОЖЬЛОЖЬЛОЖЬЛОЖЬЛОЖЬ	tremoliteЛОЖЬЛОЖЬЛОЖЬЛОЖЬЛОЖЬЛОЖЬЛОЖЬЛОЖЬЛОЖЬЛОЖЬЛОЖЬЛОЖЬЛОЖЬ	tremoliteЛОЖЬЛОЖЬЛОЖЬЛОЖЬЛОЖЬЛОЖЬЛОЖЬЛОЖЬЛОЖЬЛОЖЬЛОЖЬЛОЖЬЛОЖЬ	tremoliteЛОЖЬЛОЖЬЛОЖЬЛОЖЬЛОЖЬЛОЖЬЛОЖЬЛОЖЬЛОЖЬЛОЖЬЛОЖЬЛОЖЬЛОЖЬ	tremoliteЛОЖЬЛОЖЬЛОЖЬЛОЖЬЛОЖЬЛОЖЬЛОЖЬЛОЖЬЛОЖЬЛОЖЬЛОЖЬЛОЖЬЛОЖЬ	tremoliteЛОЖЬЛОЖЬЛОЖЬЛОЖЬЛОЖЬЛОЖЬЛОЖЬЛОЖЬЛОЖЬЛОЖЬЛОЖЬЛОЖЬЛОЖЬ	tremoliteЛОЖЬЛОЖЬЛОЖЬЛОЖЬЛОЖЬЛОЖЬЛОЖЬЛОЖЬЛОЖЬЛОЖЬЛОЖЬЛОЖЬЛОЖЬ	tremoliteЛОЖЬЛОЖЬЛОЖЬЛОЖЬЛОЖЬЛОЖЬЛОЖЬЛОЖЬЛОЖЬЛОЖЬЛОЖЬЛОЖЬЛОЖЬ	tremoliteЛОЖЬЛОЖЬЛОЖЬЛОЖЬЛОЖЬЛОЖЬЛОЖЬЛОЖЬЛОЖЬЛОЖЬЛОЖЬЛОЖЬЛОЖЬ	tremoliteЛОЖЬЛОЖЬЛОЖЬЛОЖЬЛОЖЬЛОЖЬЛОЖЬЛОЖЬЛОЖЬЛОЖЬЛОЖЬЛОЖЬЛОЖЬ	tremoliteЛОЖЬЛОЖЬЛОЖЬЛОЖЬЛОЖЬЛОЖЬЛОЖЬЛОЖЬЛОЖЬЛОЖЬЛОЖЬЛОЖЬЛОЖЬ	tremoliteЛОЖЬЛОЖЬЛОЖЬЛОЖЬЛОЖЬЛОЖЬЛОЖЬЛОЖЬЛОЖЬЛОЖЬЛОЖЬЛОЖЬЛОЖЬ	tremoliteЛОЖЬЛОЖЬЛОЖЬЛОЖЬЛОЖЬЛОЖЬЛОЖЬЛОЖЬЛОЖЬЛОЖЬЛОЖЬЛОЖЬЛОЖЬ	tremoliteЛОЖЬЛОЖЬЛОЖЬЛОЖЬЛОЖЬЛОЖЬЛОЖЬЛОЖЬЛОЖЬЛОЖЬЛОЖЬЛОЖЬЛОЖЬ	tremoliteЛОЖЬЛОЖЬЛОЖЬЛОЖЬЛОЖЬЛОЖЬЛОЖЬЛОЖЬЛОЖЬЛОЖЬЛОЖЬЛОЖЬЛОЖЬ	tremoliteЛОЖЬЛОЖЬЛОЖЬЛОЖЬЛОЖЬЛОЖЬЛОЖЬЛОЖЬЛОЖЬЛОЖЬЛОЖЬЛОЖЬЛОЖЬ	tremoliteЛОЖЬЛОЖЬЛОЖЬЛОЖЬЛОЖЬЛОЖЬЛОЖЬЛОЖЬЛОЖЬЛОЖЬЛОЖЬЛОЖЬЛОЖЬ	tremoliteЛОЖЬЛОЖЬЛОЖЬЛОЖЬЛОЖЬЛОЖЬЛОЖЬЛОЖЬЛОЖЬЛОЖЬЛОЖЬЛОЖЬЛОЖЬ	tremoliteЛОЖЬЛОЖЬЛОЖЬЛОЖЬЛОЖЬЛОЖЬЛОЖЬЛОЖЬЛОЖЬЛОЖЬЛОЖЬЛОЖЬЛОЖЬ	tremoliteЛОЖЬЛОЖЬЛОЖЬЛОЖЬЛОЖЬЛОЖЬЛОЖЬЛОЖЬЛОЖЬЛОЖЬЛОЖЬЛОЖЬЛОЖЬ	tremoliteЛОЖЬЛОЖЬЛОЖЬЛОЖЬЛОЖЬЛОЖЬЛОЖЬЛОЖЬЛОЖЬЛОЖЬЛОЖЬЛОЖЬЛОЖЬ	tremoliteЛОЖЬЛОЖЬЛОЖЬЛОЖЬЛОЖЬЛОЖЬЛОЖЬЛОЖЬЛОЖЬЛОЖЬЛОЖЬЛОЖЬЛОЖЬ	tremoliteЛОЖЬЛОЖЬЛОЖЬЛОЖЬЛОЖЬЛОЖЬЛОЖЬЛОЖЬЛОЖЬЛОЖЬЛОЖЬЛОЖЬЛОЖЬ	tremoliteЛОЖЬЛОЖЬЛОЖЬЛОЖЬЛОЖЬЛОЖЬЛОЖЬЛОЖЬЛОЖЬЛОЖЬЛОЖЬЛОЖЬЛОЖЬ	tremoliteЛОЖЬЛОЖЬЛОЖЬЛОЖЬЛОЖЬЛОЖЬЛОЖЬЛОЖЬЛОЖЬЛОЖЬЛОЖЬЛОЖЬЛОЖЬ	tremoliteЛОЖЬЛОЖЬЛОЖЬЛОЖЬЛОЖЬЛОЖЬЛОЖЬЛОЖЬЛОЖЬЛОЖЬЛОЖЬЛОЖЬЛОЖЬ	tremoliteЛОЖЬЛОЖЬЛОЖЬЛОЖЬЛОЖЬЛОЖЬЛОЖЬЛОЖЬЛОЖЬЛОЖЬЛОЖЬЛОЖЬЛОЖЬ	tremoliteЛОЖЬЛОЖЬЛОЖЬЛОЖЬЛОЖЬЛОЖЬЛОЖЬЛОЖЬЛОЖЬЛОЖЬЛОЖЬЛОЖЬЛОЖЬ	tremoliteЛОЖЬЛОЖЬЛОЖЬЛОЖЬЛОЖЬЛОЖЬЛОЖЬЛОЖЬЛОЖЬЛОЖЬЛОЖЬЛОЖЬЛОЖЬ	tremoliteЛОЖЬЛОЖЬЛОЖЬЛОЖЬЛОЖЬЛОЖЬЛОЖЬЛОЖЬЛОЖЬЛОЖЬЛОЖЬЛОЖЬЛОЖЬ	tremoliteЛОЖЬЛОЖЬЛОЖЬЛОЖЬЛОЖЬЛОЖЬЛОЖЬЛОЖЬЛОЖЬЛОЖЬЛОЖЬЛОЖЬЛОЖЬ	tremoliteЛОЖЬЛОЖЬЛОЖЬЛОЖЬЛОЖЬЛОЖЬЛОЖЬЛОЖЬЛОЖЬЛОЖЬЛОЖЬЛОЖЬЛОЖЬ	tremoliteЛОЖЬЛОЖЬЛОЖЬЛОЖЬЛОЖЬЛОЖЬЛОЖЬЛОЖЬЛОЖЬЛОЖЬЛОЖЬЛОЖЬЛОЖЬ	tremoliteЛОЖЬЛОЖЬЛОЖЬЛОЖЬЛОЖЬЛОЖЬЛОЖЬЛОЖЬЛОЖЬЛОЖЬЛОЖЬЛОЖЬЛОЖЬ
	tremolite	actinolite	magnesio-hornblende	ferro-actinolite	actinolite	tremolite	tremolite	tremolite	tremolite	tremolite	tremolite	tremolite	tremolite	tremolite	tremolite	tremolite	tremolite	tremolite	tremolite	tremolite	tremolite	tremolite	tremolite	tremolite	tremolite	tremolite	tremolite	tremolite	tremolite	tremolite	tremolite	tremolite	tremolite	tremolite	tremolite	tremolite	tremolite	tremolite	tremolite	tremolite	tremolite	tremolite	tremolite	tremolite	tremolite	tremolite	tremolite	tremolite	tremolite
Ca diagram 2	ЛОЖЬЛОЖЬЛОЖЬЛОЖЬЛОЖЬЛОЖЬЛОЖЬЛОЖЬЛОЖЬЛОЖЬЛОЖЬЛОЖЬЛОЖЬЛОЖЬЛОЖЬЛОЖЬЛОЖЬ	silicic edeniteЛОЖЬЛОЖЬЛОЖЬЛОЖЬЛОЖЬЛОЖЬЛОЖЬЛОЖЬЛОЖЬЛОЖЬЛОЖЬЛОЖЬЛОЖЬЛОЖЬЛОЖЬЛОЖЬ	ЛОЖЬЛОЖЬЛОЖЬЛОЖЬedenitic hornblendeЛОЖЬЛОЖЬЛОЖЬЛОЖЬЛОЖЬЛОЖЬЛОЖЬЛОЖЬЛОЖЬЛОЖЬЛОЖЬЛОЖЬ	ЛОЖЬsilicic ferro-edeniteЛОЖЬЛОЖЬЛОЖЬЛОЖЬЛОЖЬЛОЖЬЛОЖЬЛОЖЬЛОЖЬЛОЖЬЛОЖЬЛОЖЬЛОЖЬЛОЖЬЛОЖЬ	silicic edeniteЛОЖЬЛОЖЬЛОЖЬЛОЖЬЛОЖЬЛОЖЬЛОЖЬЛОЖЬЛОЖЬЛОЖЬЛОЖЬЛОЖЬЛОЖЬЛОЖЬЛОЖЬЛОЖЬ	ЛОЖЬЛОЖЬЛОЖЬЛОЖЬЛОЖЬЛОЖЬЛОЖЬЛОЖЬЛОЖЬЛОЖЬЛОЖЬЛОЖЬЛОЖЬЛОЖЬЛОЖЬЛОЖЬЛОЖЬ	silicic edeniteЛОЖЬЛОЖЬЛОЖЬЛОЖЬЛОЖЬЛОЖЬЛОЖЬЛОЖЬЛОЖЬЛОЖЬЛОЖЬЛОЖЬЛОЖЬЛОЖЬЛОЖЬЛОЖЬ	silicic edeniteЛОЖЬЛОЖЬЛОЖЬЛОЖЬЛОЖЬЛОЖЬЛОЖЬЛОЖЬЛОЖЬЛОЖЬЛОЖЬЛОЖЬЛОЖЬЛОЖЬЛОЖЬЛОЖЬ	silicic edeniteЛОЖЬЛОЖЬЛОЖЬЛОЖЬЛОЖЬЛОЖЬЛОЖЬЛОЖЬЛОЖЬЛОЖЬЛОЖЬЛОЖЬЛОЖЬЛОЖЬЛОЖЬЛОЖЬ	ЛОЖЬЛОЖЬЛОЖЬЛОЖЬЛОЖЬЛОЖЬЛОЖЬЛОЖЬЛОЖЬЛОЖЬЛОЖЬЛОЖЬЛОЖЬЛОЖЬЛОЖЬЛОЖЬЛОЖЬ	silicic edeniteЛОЖЬЛОЖЬЛОЖЬЛОЖЬЛОЖЬЛОЖЬЛОЖЬЛОЖЬЛОЖЬЛОЖЬЛОЖЬЛОЖЬЛОЖЬЛОЖЬЛОЖЬЛОЖЬ	silicic edeniteЛОЖЬЛОЖЬЛОЖЬЛОЖЬЛОЖЬЛОЖЬЛОЖЬЛОЖЬЛОЖЬЛОЖЬЛОЖЬЛОЖЬЛОЖЬЛОЖЬЛОЖЬЛОЖЬ	silicic edeniteЛОЖЬЛОЖЬЛОЖЬЛОЖЬЛОЖЬЛОЖЬЛОЖЬЛОЖЬЛОЖЬЛОЖЬЛОЖЬЛОЖЬЛОЖЬЛОЖЬЛОЖЬЛОЖЬ	silicic edeniteЛОЖЬЛОЖЬЛОЖЬЛОЖЬЛОЖЬЛОЖЬЛОЖЬЛОЖЬЛОЖЬЛОЖЬЛОЖЬЛОЖЬЛОЖЬЛОЖЬЛОЖЬЛОЖЬ	silicic edeniteЛОЖЬЛОЖЬЛОЖЬЛОЖЬЛОЖЬЛОЖЬЛОЖЬЛОЖЬЛОЖЬЛОЖЬЛОЖЬЛОЖЬЛОЖЬЛОЖЬЛОЖЬЛОЖЬ	silicic edeniteЛОЖЬЛОЖЬЛОЖЬЛОЖЬЛОЖЬЛОЖЬЛОЖЬЛОЖЬЛОЖЬЛОЖЬЛОЖЬЛОЖЬЛОЖЬЛОЖЬЛОЖЬЛОЖЬ	silicic edeniteЛОЖЬЛОЖЬЛОЖЬЛОЖЬЛОЖЬЛОЖЬЛОЖЬЛОЖЬЛОЖЬЛОЖЬЛОЖЬЛОЖЬЛОЖЬЛОЖЬЛОЖЬЛОЖЬ	silicic edeniteЛОЖЬЛОЖЬЛОЖЬЛОЖЬЛОЖЬЛОЖЬЛОЖЬЛОЖЬЛОЖЬЛОЖЬЛОЖЬЛОЖЬЛОЖЬЛОЖЬЛОЖЬЛОЖЬ	silicic edeniteЛОЖЬЛОЖЬЛОЖЬЛОЖЬЛОЖЬЛОЖЬЛОЖЬЛОЖЬЛОЖЬЛОЖЬЛОЖЬЛОЖЬЛОЖЬЛОЖЬЛОЖЬЛОЖЬ	silicic edeniteЛОЖЬЛОЖЬЛОЖЬЛОЖЬЛОЖЬЛОЖЬЛОЖЬЛОЖЬЛОЖЬЛОЖЬЛОЖЬЛОЖЬЛОЖЬЛОЖЬЛОЖЬЛОЖЬ	silicic edeniteЛОЖЬЛОЖЬЛОЖЬЛОЖЬЛОЖЬЛОЖЬЛОЖЬЛОЖЬЛОЖЬЛОЖЬЛОЖЬЛОЖЬЛОЖЬЛОЖЬЛОЖЬЛОЖЬ	silicic edeniteЛОЖЬЛОЖЬЛОЖЬЛОЖЬЛОЖЬЛОЖЬЛОЖЬЛОЖЬЛОЖЬЛОЖЬЛОЖЬЛОЖЬЛОЖЬЛОЖЬЛОЖЬЛОЖЬ	silicic edeniteЛОЖЬЛОЖЬЛОЖЬЛОЖЬЛОЖЬЛОЖЬЛОЖЬЛОЖЬЛОЖЬЛОЖЬЛОЖЬЛОЖЬЛОЖЬЛОЖЬЛОЖЬЛОЖЬ	silicic edeniteЛОЖЬЛОЖЬЛОЖЬЛОЖЬЛОЖЬЛОЖЬЛОЖЬЛОЖЬЛОЖЬЛОЖЬЛОЖЬЛОЖЬЛОЖЬЛОЖЬЛОЖЬЛОЖЬ	silicic edeniteЛОЖЬЛОЖЬЛОЖЬЛОЖЬЛОЖЬЛОЖЬЛОЖЬЛОЖЬЛОЖЬЛОЖЬЛОЖЬЛОЖЬЛОЖЬЛОЖЬЛОЖЬЛОЖЬ	silicic edeniteЛОЖЬЛОЖЬЛОЖЬЛОЖЬЛОЖЬЛОЖЬЛОЖЬЛОЖЬЛОЖЬЛОЖЬЛОЖЬЛОЖЬЛОЖЬЛОЖЬЛОЖЬЛОЖЬ	silicic edeniteЛОЖЬЛОЖЬЛОЖЬЛОЖЬЛОЖЬЛОЖЬЛОЖЬЛОЖЬЛОЖЬЛОЖЬЛОЖЬЛОЖЬЛОЖЬЛОЖЬЛОЖЬЛОЖЬ	silicic edeniteЛОЖЬЛОЖЬЛОЖЬЛОЖЬЛОЖЬЛОЖЬЛОЖЬЛОЖЬЛОЖЬЛОЖЬЛОЖЬЛОЖЬЛОЖЬЛОЖЬЛОЖЬЛОЖЬ	silicic edeniteЛОЖЬЛОЖЬЛОЖЬЛОЖЬЛОЖЬЛОЖЬЛОЖЬЛОЖЬЛОЖЬЛОЖЬЛОЖЬЛОЖЬЛОЖЬЛОЖЬЛОЖЬЛОЖЬ	silicic edeniteЛОЖЬЛОЖЬЛОЖЬЛОЖЬЛОЖЬЛОЖЬЛОЖЬЛОЖЬЛОЖЬЛОЖЬЛОЖЬЛОЖЬЛОЖЬЛОЖЬЛОЖЬЛОЖЬ	silicic edeniteЛОЖЬЛОЖЬЛОЖЬЛОЖЬЛОЖЬЛОЖЬЛОЖЬЛОЖЬЛОЖЬЛОЖЬЛОЖЬЛОЖЬЛОЖЬЛОЖЬЛОЖЬЛОЖЬ	silicic edeniteЛОЖЬЛОЖЬЛОЖЬЛОЖЬЛОЖЬЛОЖЬЛОЖЬЛОЖЬЛОЖЬЛОЖЬЛОЖЬЛОЖЬЛОЖЬЛОЖЬЛОЖЬЛОЖЬ	silicic edeniteЛОЖЬЛОЖЬЛОЖЬЛОЖЬЛОЖЬЛОЖЬЛОЖЬЛОЖЬЛОЖЬЛОЖЬЛОЖЬЛОЖЬЛОЖЬЛОЖЬЛОЖЬЛОЖЬ	silicic edeniteЛОЖЬЛОЖЬЛОЖЬЛОЖЬЛОЖЬЛОЖЬЛОЖЬЛОЖЬЛОЖЬЛОЖЬЛОЖЬЛОЖЬЛОЖЬЛОЖЬЛОЖЬЛОЖЬ	silicic edeniteЛОЖЬЛОЖЬЛОЖЬЛОЖЬЛОЖЬЛОЖЬЛОЖЬЛОЖЬЛОЖЬЛОЖЬЛОЖЬЛОЖЬЛОЖЬЛОЖЬЛОЖЬЛОЖЬ	silicic edeniteЛОЖЬЛОЖЬЛОЖЬЛОЖЬЛОЖЬЛОЖЬЛОЖЬЛОЖЬЛОЖЬЛОЖЬЛОЖЬЛОЖЬЛОЖЬЛОЖЬЛОЖЬЛОЖЬ	silicic edeniteЛОЖЬЛОЖЬЛОЖЬЛОЖЬЛОЖЬЛОЖЬЛОЖЬЛОЖЬЛОЖЬЛОЖЬЛОЖЬЛОЖЬЛОЖЬЛОЖЬЛОЖЬЛОЖЬ	silicic edeniteЛОЖЬЛОЖЬЛОЖЬЛОЖЬЛОЖЬЛОЖЬЛОЖЬЛОЖЬЛОЖЬЛОЖЬЛОЖЬЛОЖЬЛОЖЬЛОЖЬЛОЖЬЛОЖЬ	silicic edeniteЛОЖЬЛОЖЬЛОЖЬЛОЖЬЛОЖЬЛОЖЬЛОЖЬЛОЖЬЛОЖЬЛОЖЬЛОЖЬЛОЖЬЛОЖЬЛОЖЬЛОЖЬЛОЖЬ	silicic edeniteЛОЖЬЛОЖЬЛОЖЬЛОЖЬЛОЖЬЛОЖЬЛОЖЬЛОЖЬЛОЖЬЛОЖЬЛОЖЬЛОЖЬЛОЖЬЛОЖЬЛОЖЬЛОЖЬ	silicic edeniteЛОЖЬЛОЖЬЛОЖЬЛОЖЬЛОЖЬЛОЖЬЛОЖЬЛОЖЬЛОЖЬЛОЖЬЛОЖЬЛОЖЬЛОЖЬЛОЖЬЛОЖЬЛОЖЬ	silicic edeniteЛОЖЬЛОЖЬЛОЖЬЛОЖЬЛОЖЬЛОЖЬЛОЖЬЛОЖЬЛОЖЬЛОЖЬЛОЖЬЛОЖЬЛОЖЬЛОЖЬЛОЖЬЛОЖЬ	silicic edeniteЛОЖЬЛОЖЬЛОЖЬЛОЖЬЛОЖЬЛОЖЬЛОЖЬЛОЖЬЛОЖЬЛОЖЬЛОЖЬЛОЖЬЛОЖЬЛОЖЬЛОЖЬЛОЖЬ	silicic edeniteЛОЖЬЛОЖЬЛОЖЬЛОЖЬЛОЖЬЛОЖЬЛОЖЬЛОЖЬЛОЖЬЛОЖЬЛОЖЬЛОЖЬЛОЖЬЛОЖЬЛОЖЬЛОЖЬ	silicic edeniteЛОЖЬЛОЖЬЛОЖЬЛОЖЬЛОЖЬЛОЖЬЛОЖЬЛОЖЬЛОЖЬЛОЖЬЛОЖЬЛОЖЬЛОЖЬЛОЖЬЛОЖЬЛОЖЬ	silicic edeniteЛОЖЬЛОЖЬЛОЖЬЛОЖЬЛОЖЬЛОЖЬЛОЖЬЛОЖЬЛОЖЬЛОЖЬЛОЖЬЛОЖЬЛОЖЬЛОЖЬЛОЖЬЛОЖЬ	silicic edeniteЛОЖЬЛОЖЬЛОЖЬЛОЖЬЛОЖЬЛОЖЬЛОЖЬЛОЖЬЛОЖЬЛОЖЬЛОЖЬЛОЖЬЛОЖЬЛОЖЬЛОЖЬЛОЖЬ	silicic edeniteЛОЖЬЛОЖЬЛОЖЬЛОЖЬЛОЖЬЛОЖЬЛОЖЬЛОЖЬЛОЖЬЛОЖЬЛОЖЬЛОЖЬЛОЖЬЛОЖЬЛОЖЬЛОЖЬ	silicic edeniteЛОЖЬЛОЖЬЛОЖЬЛОЖЬЛОЖЬЛОЖЬЛОЖЬЛОЖЬЛОЖЬЛОЖЬЛОЖЬЛОЖЬЛОЖЬЛОЖЬЛОЖЬЛОЖЬ
		silicic edenite	edenitic hornblende	silicic ferro-edenite	silicic edenite		silicic edenite	silicic edenite	silicic edenite		silicic edenite	silicic edenite	silicic edenite	silicic edenite	silicic edenite	silicic edenite	silicic edenite	silicic edenite	silicic edenite	silicic edenite	silicic edenite	silicic edenite	silicic edenite	silicic edenite	silicic edenite	silicic edenite	silicic edenite	silicic edenite	silicic edenite	silicic edenite	silicic edenite	silicic edenite	silicic edenite	silicic edenite	silicic edenite	silicic edenite	silicic edenite	silicic edenite	silicic edenite	silicic edenite	silicic edenite	silicic edenite	silicic edenite	silicic edenite	silicic edenite	silicic edenite	silicic edenite	silicic edenite	silicic edenite
Ca diagram 3	ЛОЖЬЛОЖЬЛОЖЬЛОЖЬЛОЖЬЛОЖЬЛОЖЬЛОЖЬЛОЖЬЛОЖЬЛОЖЬЛОЖЬЛОЖЬЛОЖЬЛОЖЬ	silicic edeniteЛОЖЬЛОЖЬЛОЖЬЛОЖЬЛОЖЬЛОЖЬЛОЖЬЛОЖЬЛОЖЬЛОЖЬЛОЖЬЛОЖЬЛОЖЬЛОЖЬ	ЛОЖЬЛОЖЬЛОЖЬЛОЖЬedenitic hornblendeЛОЖЬЛОЖЬЛОЖЬЛОЖЬЛОЖЬЛОЖЬЛОЖЬЛОЖЬЛОЖЬЛОЖЬ	ЛОЖЬsilicic ferro-edeniteЛОЖЬЛОЖЬЛОЖЬЛОЖЬЛОЖЬЛОЖЬЛОЖЬЛОЖЬЛОЖЬЛОЖЬЛОЖЬЛОЖЬЛОЖЬ	silicic edeniteЛОЖЬЛОЖЬЛОЖЬЛОЖЬЛОЖЬЛОЖЬЛОЖЬЛОЖЬЛОЖЬЛОЖЬЛОЖЬЛОЖЬЛОЖЬЛОЖЬ	ЛОЖЬЛОЖЬЛОЖЬЛОЖЬЛОЖЬЛОЖЬЛОЖЬЛОЖЬЛОЖЬЛОЖЬЛОЖЬЛОЖЬЛОЖЬЛОЖЬЛОЖЬ	silicic edeniteЛОЖЬЛОЖЬЛОЖЬЛОЖЬЛОЖЬЛОЖЬЛОЖЬЛОЖЬЛОЖЬЛОЖЬЛОЖЬЛОЖЬЛОЖЬЛОЖЬ	silicic edeniteЛОЖЬЛОЖЬЛОЖЬЛОЖЬЛОЖЬЛОЖЬЛОЖЬЛОЖЬЛОЖЬЛОЖЬЛОЖЬЛОЖЬЛОЖЬЛОЖЬ	silicic edeniteЛОЖЬЛОЖЬЛОЖЬЛОЖЬЛОЖЬЛОЖЬЛОЖЬЛОЖЬЛОЖЬЛОЖЬЛОЖЬЛОЖЬЛОЖЬЛОЖЬ	ЛОЖЬЛОЖЬЛОЖЬЛОЖЬЛОЖЬЛОЖЬЛОЖЬЛОЖЬЛОЖЬЛОЖЬЛОЖЬЛОЖЬЛОЖЬЛОЖЬЛОЖЬ	silicic edeniteЛОЖЬЛОЖЬЛОЖЬЛОЖЬЛОЖЬЛОЖЬЛОЖЬЛОЖЬЛОЖЬЛОЖЬЛОЖЬЛОЖЬЛОЖЬЛОЖЬ	silicic edeniteЛОЖЬЛОЖЬЛОЖЬЛОЖЬЛОЖЬЛОЖЬЛОЖЬЛОЖЬЛОЖЬЛОЖЬЛОЖЬЛОЖЬЛОЖЬЛОЖЬ	silicic edeniteЛОЖЬЛОЖЬЛОЖЬЛОЖЬЛОЖЬЛОЖЬЛОЖЬЛОЖЬЛОЖЬЛОЖЬЛОЖЬЛОЖЬЛОЖЬЛОЖЬ	silicic edeniteЛОЖЬЛОЖЬЛОЖЬЛОЖЬЛОЖЬЛОЖЬЛОЖЬЛОЖЬЛОЖЬЛОЖЬЛОЖЬЛОЖЬЛОЖЬЛОЖЬ	silicic edeniteЛОЖЬЛОЖЬЛОЖЬЛОЖЬЛОЖЬЛОЖЬЛОЖЬЛОЖЬЛОЖЬЛОЖЬЛОЖЬЛОЖЬЛОЖЬЛОЖЬ	silicic edeniteЛОЖЬЛОЖЬЛОЖЬЛОЖЬЛОЖЬЛОЖЬЛОЖЬЛОЖЬЛОЖЬЛОЖЬЛОЖЬЛОЖЬЛОЖЬЛОЖЬ	silicic edeniteЛОЖЬЛОЖЬЛОЖЬЛОЖЬЛОЖЬЛОЖЬЛОЖЬЛОЖЬЛОЖЬЛОЖЬЛОЖЬЛОЖЬЛОЖЬЛОЖЬ	silicic edeniteЛОЖЬЛОЖЬЛОЖЬЛОЖЬЛОЖЬЛОЖЬЛОЖЬЛОЖЬЛОЖЬЛОЖЬЛОЖЬЛОЖЬЛОЖЬЛОЖЬ	silicic edeniteЛОЖЬЛОЖЬЛОЖЬЛОЖЬЛОЖЬЛОЖЬЛОЖЬЛОЖЬЛОЖЬЛОЖЬЛОЖЬЛОЖЬЛОЖЬЛОЖЬ	silicic edeniteЛОЖЬЛОЖЬЛОЖЬЛОЖЬЛОЖЬЛОЖЬЛОЖЬЛОЖЬЛОЖЬЛОЖЬЛОЖЬЛОЖЬЛОЖЬЛОЖЬ	silicic edeniteЛОЖЬЛОЖЬЛОЖЬЛОЖЬЛОЖЬЛОЖЬЛОЖЬЛОЖЬЛОЖЬЛОЖЬЛОЖЬЛОЖЬЛОЖЬЛОЖЬ	silicic edeniteЛОЖЬЛОЖЬЛОЖЬЛОЖЬЛОЖЬЛОЖЬЛОЖЬЛОЖЬЛОЖЬЛОЖЬЛОЖЬЛОЖЬЛОЖЬЛОЖЬ	silicic edeniteЛОЖЬЛОЖЬЛОЖЬЛОЖЬЛОЖЬЛОЖЬЛОЖЬЛОЖЬЛОЖЬЛОЖЬЛОЖЬЛОЖЬЛОЖЬЛОЖЬ	silicic edeniteЛОЖЬЛОЖЬЛОЖЬЛОЖЬЛОЖЬЛОЖЬЛОЖЬЛОЖЬЛОЖЬЛОЖЬЛОЖЬЛОЖЬЛОЖЬЛОЖЬ	silicic edeniteЛОЖЬЛОЖЬЛОЖЬЛОЖЬЛОЖЬЛОЖЬЛОЖЬЛОЖЬЛОЖЬЛОЖЬЛОЖЬЛОЖЬЛОЖЬЛОЖЬ	silicic edeniteЛОЖЬЛОЖЬЛОЖЬЛОЖЬЛОЖЬЛОЖЬЛОЖЬЛОЖЬЛОЖЬЛОЖЬЛОЖЬЛОЖЬЛОЖЬЛОЖЬ	silicic edeniteЛОЖЬЛОЖЬЛОЖЬЛОЖЬЛОЖЬЛОЖЬЛОЖЬЛОЖЬЛОЖЬЛОЖЬЛОЖЬЛОЖЬЛОЖЬЛОЖЬ	silicic edeniteЛОЖЬЛОЖЬЛОЖЬЛОЖЬЛОЖЬЛОЖЬЛОЖЬЛОЖЬЛОЖЬЛОЖЬЛОЖЬЛОЖЬЛОЖЬЛОЖЬ	silicic edeniteЛОЖЬЛОЖЬЛОЖЬЛОЖЬЛОЖЬЛОЖЬЛОЖЬЛОЖЬЛОЖЬЛОЖЬЛОЖЬЛОЖЬЛОЖЬЛОЖЬ	silicic edeniteЛОЖЬЛОЖЬЛОЖЬЛОЖЬЛОЖЬЛОЖЬЛОЖЬЛОЖЬЛОЖЬЛОЖЬЛОЖЬЛОЖЬЛОЖЬЛОЖЬ	silicic edeniteЛОЖЬЛОЖЬЛОЖЬЛОЖЬЛОЖЬЛОЖЬЛОЖЬЛОЖЬЛОЖЬЛОЖЬЛОЖЬЛОЖЬЛОЖЬЛОЖЬ	silicic edeniteЛОЖЬЛОЖЬЛОЖЬЛОЖЬЛОЖЬЛОЖЬЛОЖЬЛОЖЬЛОЖЬЛОЖЬЛОЖЬЛОЖЬЛОЖЬЛОЖЬ	silicic edeniteЛОЖЬЛОЖЬЛОЖЬЛОЖЬЛОЖЬЛОЖЬЛОЖЬЛОЖЬЛОЖЬЛОЖЬЛОЖЬЛОЖЬЛОЖЬЛОЖЬ	silicic edeniteЛОЖЬЛОЖЬЛОЖЬЛОЖЬЛОЖЬЛОЖЬЛОЖЬЛОЖЬЛОЖЬЛОЖЬЛОЖЬЛОЖЬЛОЖЬЛОЖЬ	silicic edeniteЛОЖЬЛОЖЬЛОЖЬЛОЖЬЛОЖЬЛОЖЬЛОЖЬЛОЖЬЛОЖЬЛОЖЬЛОЖЬЛОЖЬЛОЖЬЛОЖЬ	silicic edeniteЛОЖЬЛОЖЬЛОЖЬЛОЖЬЛОЖЬЛОЖЬЛОЖЬЛОЖЬЛОЖЬЛОЖЬЛОЖЬЛОЖЬЛОЖЬЛОЖЬ	silicic edeniteЛОЖЬЛОЖЬЛОЖЬЛОЖЬЛОЖЬЛОЖЬЛОЖЬЛОЖЬЛОЖЬЛОЖЬЛОЖЬЛОЖЬЛОЖЬЛОЖЬ	silicic edeniteЛОЖЬЛОЖЬЛОЖЬЛОЖЬЛОЖЬЛОЖЬЛОЖЬЛОЖЬЛОЖЬЛОЖЬЛОЖЬЛОЖЬЛОЖЬЛОЖЬ	silicic edeniteЛОЖЬЛОЖЬЛОЖЬЛОЖЬЛОЖЬЛОЖЬЛОЖЬЛОЖЬЛОЖЬЛОЖЬЛОЖЬЛОЖЬЛОЖЬЛОЖЬ	silicic edeniteЛОЖЬЛОЖЬЛОЖЬЛОЖЬЛОЖЬЛОЖЬЛОЖЬЛОЖЬЛОЖЬЛОЖЬЛОЖЬЛОЖЬЛОЖЬЛОЖЬ	silicic edeniteЛОЖЬЛОЖЬЛОЖЬЛОЖЬЛОЖЬЛОЖЬЛОЖЬЛОЖЬЛОЖЬЛОЖЬЛОЖЬЛОЖЬЛОЖЬЛОЖЬ	silicic edeniteЛОЖЬЛОЖЬЛОЖЬЛОЖЬЛОЖЬЛОЖЬЛОЖЬЛОЖЬЛОЖЬЛОЖЬЛОЖЬЛОЖЬЛОЖЬЛОЖЬ	silicic edeniteЛОЖЬЛОЖЬЛОЖЬЛОЖЬЛОЖЬЛОЖЬЛОЖЬЛОЖЬЛОЖЬЛОЖЬЛОЖЬЛОЖЬЛОЖЬЛОЖЬ	silicic edeniteЛОЖЬЛОЖЬЛОЖЬЛОЖЬЛОЖЬЛОЖЬЛОЖЬЛОЖЬЛОЖЬЛОЖЬЛОЖЬЛОЖЬЛОЖЬЛОЖЬ	silicic edeniteЛОЖЬЛОЖЬЛОЖЬЛОЖЬЛОЖЬЛОЖЬЛОЖЬЛОЖЬЛОЖЬЛОЖЬЛОЖЬЛОЖЬЛОЖЬЛОЖЬ	silicic edeniteЛОЖЬЛОЖЬЛОЖЬЛОЖЬЛОЖЬЛОЖЬЛОЖЬЛОЖЬЛОЖЬЛОЖЬЛОЖЬЛОЖЬЛОЖЬЛОЖЬ	silicic edeniteЛОЖЬЛОЖЬЛОЖЬЛОЖЬЛОЖЬЛОЖЬЛОЖЬЛОЖЬЛОЖЬЛОЖЬЛОЖЬЛОЖЬЛОЖЬЛОЖЬ	silicic edeniteЛОЖЬЛОЖЬЛОЖЬЛОЖЬЛОЖЬЛОЖЬЛОЖЬЛОЖЬЛОЖЬЛОЖЬЛОЖЬЛОЖЬЛОЖЬЛОЖЬ	silicic edeniteЛОЖЬЛОЖЬЛОЖЬЛОЖЬЛОЖЬЛОЖЬЛОЖЬЛОЖЬЛОЖЬЛОЖЬЛОЖЬЛОЖЬЛОЖЬЛОЖЬ
		silicic edenite	edenitic hornblende	silicic ferro-edenite	silicic edenite		silicic edenite	silicic edenite	silicic edenite		silicic edenite	silicic edenite	silicic edenite	silicic edenite	silicic edenite	silicic edenite	silicic edenite	silicic edenite	silicic edenite	silicic edenite	silicic edenite	silicic edenite	silicic edenite	silicic edenite	silicic edenite	silicic edenite	silicic edenite	silicic edenite	silicic edenite	silicic edenite	silicic edenite	silicic edenite	silicic edenite	silicic edenite	silicic edenite	silicic edenite	silicic edenite	silicic edenite	silicic edenite	silicic edenite	silicic edenite	silicic edenite	silicic edenite	silicic edenite	silicic edenite	silicic edenite	silicic edenite	silicic edenite	silicic edenite
Ca diagram 4	FALSE	FALSE	FALSE	FALSE	FALSE	FALSE	FALSE	FALSE	FALSE	FALSE	FALSE	FALSE	FALSE	FALSE	FALSE	FALSE	FALSE	FALSE	FALSE	FALSE	FALSE	FALSE	FALSE	FALSE	FALSE	FALSE	FALSE	FALSE	FALSE	FALSE	FALSE	FALSE	FALSE	FALSE	FALSE	FALSE	FALSE	FALSE	FALSE	FALSE	FALSE	FALSE	FALSE	FALSE	FALSE	FALSE	FALSE	FALSE	FALSE
Fe-Mg-Mn orthorhombic diagram	magnesio-anthophyllite	anthophyllite	magnesio-gedrite	anthophyllite	anthophyllite	magnesio-anthophyllite	magnesio-anthophyllite	magnesio-anthophyllite	magnesio-anthophyllite	magnesio-anthophyllite	magnesio-anthophyllite	magnesio-anthophyllite	magnesio-anthophyllite	magnesio-anthophyllite	magnesio-anthophyllite	magnesio-anthophyllite	magnesio-anthophyllite	magnesio-anthophyllite	magnesio-anthophyllite	magnesio-anthophyllite	magnesio-anthophyllite	magnesio-anthophyllite	magnesio-anthophyllite	magnesio-anthophyllite	magnesio-anthophyllite	magnesio-anthophyllite	magnesio-anthophyllite	magnesio-anthophyllite	magnesio-anthophyllite	magnesio-anthophyllite	magnesio-anthophyllite	magnesio-anthophyllite	magnesio-anthophyllite	magnesio-anthophyllite	magnesio-anthophyllite	magnesio-anthophyllite	magnesio-anthophyllite	magnesio-anthophyllite	magnesio-anthophyllite	magnesio-anthophyllite	magnesio-anthophyllite	magnesio-anthophyllite	magnesio-anthophyllite	magnesio-anthophyllite	magnesio-anthophyllite	magnesio-anthophyllite	magnesio-anthophyllite	magnesio-anthophyllite	magnesio-anthophyllite
Fe-Mg-Mn monoclinic diagram	magnesio-cummingtonite	cummingtonite	magnesio-cummingtonite	dannemoreite	tirodite	magnesio-cummingtonite	magnesio-cummingtonite	magnesio-cummingtonite	magnesio-cummingtonite	magnesio-cummingtonite	magnesio-cummingtonite	magnesio-cummingtonite	magnesio-cummingtonite	magnesio-cummingtonite	magnesio-cummingtonite	magnesio-cummingtonite	magnesio-cummingtonite	magnesio-cummingtonite	magnesio-cummingtonite	magnesio-cummingtonite	magnesio-cummingtonite	magnesio-cummingtonite	magnesio-cummingtonite	magnesio-cummingtonite	magnesio-cummingtonite	magnesio-cummingtonite	magnesio-cummingtonite	magnesio-cummingtonite	magnesio-cummingtonite	magnesio-cummingtonite	magnesio-cummingtonite	magnesio-cummingtonite	magnesio-cummingtonite	magnesio-cummingtonite	magnesio-cummingtonite	magnesio-cummingtonite	magnesio-cummingtonite	magnesio-cummingtonite	magnesio-cummingtonite	magnesio-cummingtonite	magnesio-cummingtonite	magnesio-cummingtonite	magnesio-cummingtonite	magnesio-cummingtonite	magnesio-cummingtonite	magnesio-cummingtonite	magnesio-cummingtonite	magnesio-cummingtonite	magnesio-cummingtonite
Na-Ca diagram 1	winchite	winchite	barroisite	ferro-winchite	winchite	winchite	winchite	winchite	winchite	winchite	winchite	winchite	winchite	winchite	winchite	winchite	winchite	winchite	winchite	winchite	winchite	winchite	winchite	winchite	winchite	winchite	winchite	winchite	winchite	winchite	winchite	winchite	winchite	winchite	winchite	winchite	winchite	winchite	winchite	winchite	winchite	winchite	winchite	winchite	winchite	winchite	winchite	winchite	winchite
Na-Ca diagram 2	richterite	richterite	magnesio-kataphorite	ferro-richterite	richterite	richterite	richterite	richterite	richterite	richterite	richterite	richterite	richterite	richterite	richterite	richterite	richterite	richterite	richterite	richterite	richterite	richterite	richterite	richterite	richterite	richterite	richterite	richterite	richterite	richterite	richterite	richterite	richterite	richterite	richterite	richterite	richterite	richterite	richterite	richterite	richterite	richterite	richterite	richterite	richterite	richterite	richterite	richterite	richterite
Alkali diagram 1	nyboite	nyboite	nyboite	ferro-anophorite	nyboite	anophorite	anophorite	anophorite	anophorite	nyboite	anophorite	anophorite	anophorite	anophorite	anophorite	anophorite	anophorite	anophorite	anophorite	anophorite	anophorite	anophorite	anophorite	anophorite	anophorite	anophorite	anophorite	anophorite	anophorite	anophorite	anophorite	anophorite	anophorite	anophorite	anophorite	anophorite	anophorite	anophorite	anophorite	anophorite	anophorite	anophorite	anophorite	anophorite	anophorite	anophorite	anophorite	anophorite	anophorite
Alkali diagram 2	glaucophane	glaucophane	glaucophane	riebeckite	glaucophane	crossite	magnesio-riebeckite	magnesio-riebeckite	magnesio-riebeckite	glaucophane	magnesio-riebeckite	magnesio-riebeckite	magnesio-riebeckite	magnesio-riebeckite	magnesio-riebeckite	magnesio-riebeckite	magnesio-riebeckite	magnesio-riebeckite	magnesio-riebeckite	magnesio-riebeckite	magnesio-riebeckite	magnesio-riebeckite	magnesio-riebeckite	magnesio-riebeckite	magnesio-riebeckite	magnesio-riebeckite	magnesio-riebeckite	magnesio-riebeckite	magnesio-riebeckite	magnesio-riebeckite	magnesio-riebeckite	magnesio-riebeckite	magnesio-riebeckite	magnesio-riebeckite	magnesio-riebeckite	magnesio-riebeckite	magnesio-riebeckite	magnesio-riebeckite	magnesio-riebeckite	magnesio-riebeckite	magnesio-riebeckite	magnesio-riebeckite	magnesio-riebeckite	magnesio-riebeckite	magnesio-riebeckite	magnesio-riebeckite	magnesio-riebeckite	magnesio-riebeckite	magnesio-riebeckite
Alkali diagram 3	eckermannite	eckermannite	eckermannite	arfvedsonite	eckermannite	magnesio-arfvedsonite	magnesio-arfvedsonite	magnesio-arfvedsonite	magnesio-arfvedsonite	eckermannite	magnesio-arfvedsonite	magnesio-arfvedsonite	magnesio-arfvedsonite	magnesio-arfvedsonite	magnesio-arfvedsonite	magnesio-arfvedsonite	magnesio-arfvedsonite	magnesio-arfvedsonite	magnesio-arfvedsonite	magnesio-arfvedsonite	magnesio-arfvedsonite	magnesio-arfvedsonite	magnesio-arfvedsonite	magnesio-arfvedsonite	magnesio-arfvedsonite	magnesio-arfvedsonite	magnesio-arfvedsonite	magnesio-arfvedsonite	magnesio-arfvedsonite	magnesio-arfvedsonite	magnesio-arfvedsonite	magnesio-arfvedsonite	magnesio-arfvedsonite	magnesio-arfvedsonite	magnesio-arfvedsonite	magnesio-arfvedsonite	magnesio-arfvedsonite	magnesio-arfvedsonite	magnesio-arfvedsonite	magnesio-arfvedsonite	magnesio-arfvedsonite	magnesio-arfvedsonite	magnesio-arfvedsonite	magnesio-arfvedsonite	magnesio-arfvedsonite	magnesio-arfvedsonite	magnesio-arfvedsonite	magnesio-arfvedsonite	magnesio-arfvedsonite
Alkali diagram 4 (kozulite)	FALSE	FALSE	FALSE	FALSE	FALSE	FALSE	FALSE	FALSE	FALSE	FALSE	FALSE	FALSE	FALSE	FALSE	FALSE	FALSE	FALSE	FALSE	FALSE	FALSE	FALSE	FALSE	FALSE	FALSE	FALSE	FALSE	FALSE	FALSE	FALSE	FALSE	FALSE	FALSE	FALSE	FALSE	FALSE	FALSE	FALSE	FALSE	FALSE	FALSE	FALSE	FALSE	FALSE	FALSE	FALSE	FALSE	FALSE	FALSE	FALSE
Part 13. Select TRUE name for each group
Ca amph definition	FALSE	FALSE	FALSE	FALSE	FALSE	FALSE	FALSE	FALSE	FALSE	FALSE	FALSE	FALSE	FALSE	FALSE	FALSE	FALSE	FALSE	FALSE	FALSE	FALSE	FALSE	FALSE	FALSE	FALSE	FALSE	FALSE	FALSE	FALSE	FALSE	FALSE	FALSE	FALSE	FALSE	FALSE	FALSE	FALSE	FALSE	FALSE	FALSE	FALSE	FALSE	FALSE	FALSE	FALSE	FALSE	FALSE	FALSE	FALSE	FALSE
	FALSE	FALSE	FALSE	FALSE	FALSE	FALSE	FALSE	FALSE	FALSE	FALSE	FALSE	FALSE	FALSE	FALSE	FALSE	FALSE	FALSE	FALSE	FALSE	FALSE	FALSE	FALSE	FALSE	FALSE	FALSE	FALSE	FALSE	FALSE	FALSE	FALSE	FALSE	FALSE	FALSE	FALSE	FALSE	FALSE	FALSE	FALSE	FALSE	FALSE	FALSE	FALSE	FALSE	FALSE	FALSE	FALSE	FALSE	FALSE	FALSE
	FALSE	FALSE	FALSE	FALSE	FALSE	FALSE	FALSE	FALSE	FALSE	FALSE	FALSE	FALSE	FALSE	FALSE	FALSE	silicic edenite	silicic edenite	FALSE	FALSE	FALSE	FALSE	FALSE	FALSE	FALSE	FALSE	FALSE	FALSE	FALSE	FALSE	FALSE	FALSE	FALSE	FALSE	FALSE	FALSE	FALSE	FALSE	FALSE	FALSE	FALSE	FALSE	FALSE	FALSE	FALSE	FALSE	FALSE	FALSE	FALSE	FALSE
	FALSE	FALSE	FALSE	FALSE	FALSE	FALSE	FALSE	FALSE	FALSE	FALSE	FALSE	FALSE	FALSE	FALSE	FALSE	FALSE	FALSE	FALSE	FALSE	FALSE	FALSE	FALSE	FALSE	FALSE	FALSE	FALSE	FALSE	FALSE	FALSE	FALSE	FALSE	FALSE	FALSE	FALSE	FALSE	FALSE	FALSE	FALSE	FALSE	FALSE	FALSE	FALSE	FALSE	FALSE	FALSE	FALSE	FALSE	FALSE	FALSE
Fe-Mg-Mn definition	FALSE	FALSE	FALSE	dannemoreite	tirodite	FALSE	FALSE	FALSE	FALSE	FALSE	FALSE	FALSE	FALSE	FALSE	FALSE	FALSE	FALSE	FALSE	FALSE	FALSE	FALSE	FALSE	FALSE	FALSE	FALSE	FALSE	FALSE	FALSE	FALSE	FALSE	FALSE	FALSE	FALSE	FALSE	FALSE	FALSE	FALSE	FALSE	FALSE	FALSE	FALSE	FALSE	FALSE	FALSE	FALSE	FALSE	FALSE	FALSE	FALSE
	magnesio-cummingtonite	cummingtonite	magnesio-cummingtonite			magnesio-cummingtonite	magnesio-cummingtonite	magnesio-cummingtonite	magnesio-cummingtonite	magnesio-cummingtonite	magnesio-cummingtonite	magnesio-cummingtonite	magnesio-cummingtonite	magnesio-cummingtonite	magnesio-cummingtonite	magnesio-cummingtonite	magnesio-cummingtonite	magnesio-cummingtonite	magnesio-cummingtonite	magnesio-cummingtonite	magnesio-cummingtonite	magnesio-cummingtonite	magnesio-cummingtonite	magnesio-cummingtonite	magnesio-cummingtonite	magnesio-cummingtonite	magnesio-cummingtonite	magnesio-cummingtonite	magnesio-cummingtonite	magnesio-cummingtonite	magnesio-cummingtonite	magnesio-cummingtonite	magnesio-cummingtonite	magnesio-cummingtonite	magnesio-cummingtonite	magnesio-cummingtonite	magnesio-cummingtonite	magnesio-cummingtonite	magnesio-cummingtonite	magnesio-cummingtonite	magnesio-cummingtonite	magnesio-cummingtonite	magnesio-cummingtonite	magnesio-cummingtonite	magnesio-cummingtonite	magnesio-cummingtonite	magnesio-cummingtonite	magnesio-cummingtonite	magnesio-cummingtonite
Na-Ca amph definition	FALSE	FALSE	FALSE	FALSE	FALSE	winchite	FALSE	FALSE	FALSE	FALSE	FALSE	FALSE	FALSE	FALSE	FALSE	FALSE	FALSE	FALSE	FALSE	FALSE	FALSE	FALSE	FALSE	FALSE	FALSE	FALSE	FALSE	FALSE	FALSE	FALSE	FALSE	FALSE	FALSE	FALSE	FALSE	FALSE	FALSE	FALSE	FALSE	FALSE	FALSE	FALSE	FALSE	FALSE	FALSE	FALSE	FALSE	FALSE	FALSE
	FALSE	FALSE	FALSE	FALSE	FALSE	FALSE	richterite	richterite	richterite	richterite	richterite	richterite	richterite	richterite	richterite	FALSE	FALSE	richterite	richterite	richterite	richterite	richterite	richterite	richterite	richterite	richterite	richterite	richterite	richterite	richterite	richterite	richterite	richterite	richterite	richterite	richterite	richterite	richterite	richterite	richterite	richterite	richterite	richterite	richterite	richterite	richterite	richterite	richterite	richterite
Alkali amph definition	FALSE	FALSE	FALSE	FALSE	FALSE	FALSE	FALSE	FALSE	FALSE	FALSE	FALSE	FALSE	FALSE	FALSE	FALSE	FALSE	FALSE	FALSE	FALSE	FALSE	FALSE	FALSE	FALSE	FALSE	FALSE	FALSE	FALSE	FALSE	FALSE	FALSE	FALSE	FALSE	FALSE	FALSE	FALSE	FALSE	FALSE	FALSE	FALSE	FALSE	FALSE	FALSE	FALSE	FALSE	FALSE	FALSE	FALSE	FALSE	FALSE
	FALSE	FALSE	FALSE	FALSE	FALSE	FALSE	FALSE	FALSE	FALSE	FALSE	FALSE	FALSE	FALSE	FALSE	FALSE	FALSE	FALSE	FALSE	FALSE	FALSE	FALSE	FALSE	FALSE	FALSE	FALSE	FALSE	FALSE	FALSE	FALSE	FALSE	FALSE	FALSE	FALSE	FALSE	FALSE	FALSE	FALSE	FALSE	FALSE	FALSE	FALSE	FALSE	FALSE	FALSE	FALSE	FALSE	FALSE	FALSE	FALSE
	FALSE	FALSE	FALSE	FALSE	FALSE	FALSE	FALSE	FALSE	FALSE	FALSE	FALSE	FALSE	FALSE	FALSE	FALSE	FALSE	FALSE	FALSE	FALSE	FALSE	FALSE	FALSE	FALSE	FALSE	FALSE	FALSE	FALSE	FALSE	FALSE	FALSE	FALSE	FALSE	FALSE	FALSE	FALSE	FALSE	FALSE	FALSE	FALSE	FALSE	FALSE	FALSE	FALSE	FALSE	FALSE	FALSE	FALSE	FALSE	FALSE
	FALSE	FALSE	FALSE	FALSE	FALSE	FALSE	FALSE	FALSE	FALSE	FALSE	FALSE	FALSE	FALSE	FALSE	FALSE	FALSE	FALSE	FALSE	FALSE	FALSE	FALSE	FALSE	FALSE	FALSE	FALSE	FALSE	FALSE	FALSE	FALSE	FALSE	FALSE	FALSE	FALSE	FALSE	FALSE	FALSE	FALSE	FALSE	FALSE	FALSE	FALSE	FALSE	FALSE	FALSE	FALSE	FALSE	FALSE	FALSE	FALSE
Part 14. Decide on fundamental name
Which calcic amphibole	ЛОЖЬЛОЖЬЛОЖЬЛОЖЬ	ЛОЖЬЛОЖЬЛОЖЬЛОЖЬ	ЛОЖЬЛОЖЬЛОЖЬЛОЖЬ	ЛОЖЬЛОЖЬЛОЖЬЛОЖЬ	ЛОЖЬЛОЖЬЛОЖЬЛОЖЬ	ЛОЖЬЛОЖЬЛОЖЬЛОЖЬ	ЛОЖЬЛОЖЬЛОЖЬЛОЖЬ	ЛОЖЬЛОЖЬЛОЖЬЛОЖЬ	ЛОЖЬЛОЖЬЛОЖЬЛОЖЬ	ЛОЖЬЛОЖЬЛОЖЬЛОЖЬ	ЛОЖЬЛОЖЬЛОЖЬЛОЖЬ	ЛОЖЬЛОЖЬЛОЖЬЛОЖЬ	ЛОЖЬЛОЖЬЛОЖЬЛОЖЬ	ЛОЖЬЛОЖЬЛОЖЬЛОЖЬ	ЛОЖЬЛОЖЬЛОЖЬЛОЖЬ	ЛОЖЬЛОЖЬsilicic edeniteЛОЖЬ	ЛОЖЬЛОЖЬsilicic edeniteЛОЖЬ	ЛОЖЬЛОЖЬЛОЖЬЛОЖЬ	ЛОЖЬЛОЖЬЛОЖЬЛОЖЬ	ЛОЖЬЛОЖЬЛОЖЬЛОЖЬ	ЛОЖЬЛОЖЬЛОЖЬЛОЖЬ	ЛОЖЬЛОЖЬЛОЖЬЛОЖЬ	ЛОЖЬЛОЖЬЛОЖЬЛОЖЬ	ЛОЖЬЛОЖЬЛОЖЬЛОЖЬ	ЛОЖЬЛОЖЬЛОЖЬЛОЖЬ	ЛОЖЬЛОЖЬЛОЖЬЛОЖЬ	ЛОЖЬЛОЖЬЛОЖЬЛОЖЬ	ЛОЖЬЛОЖЬЛОЖЬЛОЖЬ	ЛОЖЬЛОЖЬЛОЖЬЛОЖЬ	ЛОЖЬЛОЖЬЛОЖЬЛОЖЬ	ЛОЖЬЛОЖЬЛОЖЬЛОЖЬ	ЛОЖЬЛОЖЬЛОЖЬЛОЖЬ	ЛОЖЬЛОЖЬЛОЖЬЛОЖЬ	ЛОЖЬЛОЖЬЛОЖЬЛОЖЬ	ЛОЖЬЛОЖЬЛОЖЬЛОЖЬ	ЛОЖЬЛОЖЬЛОЖЬЛОЖЬ	ЛОЖЬЛОЖЬЛОЖЬЛОЖЬ	ЛОЖЬЛОЖЬЛОЖЬЛОЖЬ	ЛОЖЬЛОЖЬЛОЖЬЛОЖЬ	ЛОЖЬЛОЖЬЛОЖЬЛОЖЬ	ЛОЖЬЛОЖЬЛОЖЬЛОЖЬ	ЛОЖЬЛОЖЬЛОЖЬЛОЖЬ	ЛОЖЬЛОЖЬЛОЖЬЛОЖЬ	ЛОЖЬЛОЖЬЛОЖЬЛОЖЬ	ЛОЖЬЛОЖЬЛОЖЬЛОЖЬ	ЛОЖЬЛОЖЬЛОЖЬЛОЖЬ	ЛОЖЬЛОЖЬЛОЖЬЛОЖЬ	ЛОЖЬЛОЖЬЛОЖЬЛОЖЬ	ЛОЖЬЛОЖЬЛОЖЬЛОЖЬ
																silicic edenite	silicic edenite
Which Fe-Mg-Mn amphibole	magnesio-anthophyllite	anthophyllite	magnesio-gedrite	dannemoreite	tirodite	FALSE	FALSE	FALSE	FALSE	FALSE	FALSE	FALSE	FALSE	FALSE	FALSE	FALSE	FALSE	FALSE	FALSE	FALSE	FALSE	FALSE	FALSE	FALSE	FALSE	FALSE	FALSE	FALSE	FALSE	FALSE	FALSE	FALSE	FALSE	FALSE	FALSE	FALSE	FALSE	FALSE	FALSE	FALSE	FALSE	FALSE	FALSE	FALSE	FALSE	FALSE	FALSE	FALSE	FALSE
Which Na-Ca amphibole	ЛОЖЬЛОЖЬ	ЛОЖЬЛОЖЬ	ЛОЖЬЛОЖЬ	ЛОЖЬЛОЖЬ	ЛОЖЬЛОЖЬ	winchiteЛОЖЬ	ЛОЖЬrichterite	ЛОЖЬrichterite	ЛОЖЬrichterite	ЛОЖЬrichterite	ЛОЖЬrichterite	ЛОЖЬrichterite	ЛОЖЬrichterite	ЛОЖЬrichterite	ЛОЖЬrichterite	ЛОЖЬЛОЖЬ	ЛОЖЬЛОЖЬ	ЛОЖЬrichterite	ЛОЖЬrichterite	ЛОЖЬrichterite	ЛОЖЬrichterite	ЛОЖЬrichterite	ЛОЖЬrichterite	ЛОЖЬrichterite	ЛОЖЬrichterite	ЛОЖЬrichterite	ЛОЖЬrichterite	ЛОЖЬrichterite	ЛОЖЬrichterite	ЛОЖЬrichterite	ЛОЖЬrichterite	ЛОЖЬrichterite	ЛОЖЬrichterite	ЛОЖЬrichterite	ЛОЖЬrichterite	ЛОЖЬrichterite	ЛОЖЬrichterite	ЛОЖЬrichterite	ЛОЖЬrichterite	ЛОЖЬrichterite	ЛОЖЬrichterite	ЛОЖЬrichterite	ЛОЖЬrichterite	ЛОЖЬrichterite	ЛОЖЬrichterite	ЛОЖЬrichterite	ЛОЖЬrichterite	ЛОЖЬrichterite	ЛОЖЬrichterite
						winchite	richterite	richterite	richterite	richterite	richterite	richterite	richterite	richterite	richterite			richterite	richterite	richterite	richterite	richterite	richterite	richterite	richterite	richterite	richterite	richterite	richterite	richterite	richterite	richterite	richterite	richterite	richterite	richterite	richterite	richterite	richterite	richterite	richterite	richterite	richterite	richterite	richterite	richterite	richterite	richterite	richterite
Which alkali amphibole	ЛОЖЬЛОЖЬЛОЖЬЛОЖЬ	ЛОЖЬЛОЖЬЛОЖЬЛОЖЬ	ЛОЖЬЛОЖЬЛОЖЬЛОЖЬ	ЛОЖЬЛОЖЬЛОЖЬЛОЖЬ	ЛОЖЬЛОЖЬЛОЖЬЛОЖЬ	ЛОЖЬЛОЖЬЛОЖЬЛОЖЬ	ЛОЖЬЛОЖЬЛОЖЬЛОЖЬ	ЛОЖЬЛОЖЬЛОЖЬЛОЖЬ	ЛОЖЬЛОЖЬЛОЖЬЛОЖЬ	ЛОЖЬЛОЖЬЛОЖЬЛОЖЬ	ЛОЖЬЛОЖЬЛОЖЬЛОЖЬ	ЛОЖЬЛОЖЬЛОЖЬЛОЖЬ	ЛОЖЬЛОЖЬЛОЖЬЛОЖЬ	ЛОЖЬЛОЖЬЛОЖЬЛОЖЬ	ЛОЖЬЛОЖЬЛОЖЬЛОЖЬ	ЛОЖЬЛОЖЬЛОЖЬЛОЖЬ	ЛОЖЬЛОЖЬЛОЖЬЛОЖЬ	ЛОЖЬЛОЖЬЛОЖЬЛОЖЬ	ЛОЖЬЛОЖЬЛОЖЬЛОЖЬ	ЛОЖЬЛОЖЬЛОЖЬЛОЖЬ	ЛОЖЬЛОЖЬЛОЖЬЛОЖЬ	ЛОЖЬЛОЖЬЛОЖЬЛОЖЬ	ЛОЖЬЛОЖЬЛОЖЬЛОЖЬ	ЛОЖЬЛОЖЬЛОЖЬЛОЖЬ	ЛОЖЬЛОЖЬЛОЖЬЛОЖЬ	ЛОЖЬЛОЖЬЛОЖЬЛОЖЬ	ЛОЖЬЛОЖЬЛОЖЬЛОЖЬ	ЛОЖЬЛОЖЬЛОЖЬЛОЖЬ	ЛОЖЬЛОЖЬЛОЖЬЛОЖЬ	ЛОЖЬЛОЖЬЛОЖЬЛОЖЬ	ЛОЖЬЛОЖЬЛОЖЬЛОЖЬ	ЛОЖЬЛОЖЬЛОЖЬЛОЖЬ	ЛОЖЬЛОЖЬЛОЖЬЛОЖЬ	ЛОЖЬЛОЖЬЛОЖЬЛОЖЬ	ЛОЖЬЛОЖЬЛОЖЬЛОЖЬ	ЛОЖЬЛОЖЬЛОЖЬЛОЖЬ	ЛОЖЬЛОЖЬЛОЖЬЛОЖЬ	ЛОЖЬЛОЖЬЛОЖЬЛОЖЬ	ЛОЖЬЛОЖЬЛОЖЬЛОЖЬ	ЛОЖЬЛОЖЬЛОЖЬЛОЖЬ	ЛОЖЬЛОЖЬЛОЖЬЛОЖЬ	ЛОЖЬЛОЖЬЛОЖЬЛОЖЬ	ЛОЖЬЛОЖЬЛОЖЬЛОЖЬ	ЛОЖЬЛОЖЬЛОЖЬЛОЖЬ	ЛОЖЬЛОЖЬЛОЖЬЛОЖЬ	ЛОЖЬЛОЖЬЛОЖЬЛОЖЬ	ЛОЖЬЛОЖЬЛОЖЬЛОЖЬ	ЛОЖЬЛОЖЬЛОЖЬЛОЖЬ	ЛОЖЬЛОЖЬЛОЖЬЛОЖЬ
	magnesio-anthophyllite	anthophyllite	magnesio-gedrite	dannemoreite	tirodite	ЛОЖЬwinchite	ЛОЖЬrichterite	ЛОЖЬrichterite	ЛОЖЬrichterite	ЛОЖЬrichterite	ЛОЖЬrichterite	ЛОЖЬrichterite	ЛОЖЬrichterite	ЛОЖЬrichterite	ЛОЖЬrichterite	silicic edeniteЛОЖЬ	silicic edeniteЛОЖЬ	ЛОЖЬrichterite	ЛОЖЬrichterite	ЛОЖЬrichterite	ЛОЖЬrichterite	ЛОЖЬrichterite	ЛОЖЬrichterite	ЛОЖЬrichterite	ЛОЖЬrichterite	ЛОЖЬrichterite	ЛОЖЬrichterite	ЛОЖЬrichterite	ЛОЖЬrichterite	ЛОЖЬrichterite	ЛОЖЬrichterite	ЛОЖЬrichterite	ЛОЖЬrichterite	ЛОЖЬrichterite	ЛОЖЬrichterite	ЛОЖЬrichterite	ЛОЖЬrichterite	ЛОЖЬrichterite	ЛОЖЬrichterite	ЛОЖЬrichterite	ЛОЖЬrichterite	ЛОЖЬrichterite	ЛОЖЬrichterite	ЛОЖЬrichterite	ЛОЖЬrichterite	ЛОЖЬrichterite	ЛОЖЬrichterite	ЛОЖЬrichterite	ЛОЖЬrichterite
Which amphibole	magnesio-anthophyllite	anthophyllite	magnesio-gedrite	dannemoreite	tirodite	winchite	richterite	richterite	richterite	richterite	richterite	richterite	richterite	richterite	richterite	silicic edenite	silicic edenite	richterite	richterite	richterite	richterite	richterite	richterite	richterite	richterite	richterite	richterite	richterite	richterite	richterite	richterite	richterite	richterite	richterite	richterite	richterite	richterite	richterite	richterite	richterite	richterite	richterite	richterite	richterite	richterite	richterite	richterite	richterite	richterite
Part 15. Check for prefixes
chlor-	FALSE	FALSE	FALSE	FALSE	FALSE	FALSE	FALSE	FALSE	FALSE	FALSE	FALSE	FALSE	FALSE	FALSE	FALSE	FALSE	FALSE	FALSE	FALSE	FALSE	FALSE	FALSE	FALSE	FALSE	FALSE	FALSE	FALSE	FALSE	FALSE	FALSE	FALSE	FALSE	FALSE	FALSE	FALSE	FALSE	FALSE	FALSE	FALSE	FALSE	FALSE	FALSE	FALSE	FALSE	FALSE	FALSE	FALSE	FALSE	FALSE
chromium-	FALSE	FALSE	FALSE	FALSE	FALSE	FALSE	FALSE	FALSE	FALSE	FALSE	FALSE	FALSE	FALSE	FALSE	FALSE	FALSE	FALSE	FALSE	FALSE	FALSE	FALSE	FALSE	FALSE	FALSE	FALSE	FALSE	FALSE	FALSE	FALSE	FALSE	FALSE	FALSE	FALSE	FALSE	FALSE	FALSE	FALSE	FALSE	FALSE	FALSE	FALSE	FALSE	FALSE	FALSE	FALSE	FALSE	FALSE	FALSE	FALSE
chromian-	FALSE	FALSE	FALSE	FALSE	FALSE	FALSE	FALSE	FALSE	FALSE	FALSE	FALSE	FALSE	FALSE	FALSE	FALSE	FALSE	FALSE	FALSE	FALSE	FALSE	FALSE	FALSE	FALSE	FALSE	FALSE	FALSE	FALSE	FALSE	FALSE	FALSE	FALSE	FALSE	FALSE	FALSE	FALSE	FALSE	FALSE	FALSE	FALSE	FALSE	FALSE	FALSE	FALSE	FALSE	FALSE	FALSE	FALSE	FALSE	FALSE
check for hastingsites etc.	FALSE	FALSE	FALSE	FALSE	FALSE	FALSE	FALSE	FALSE	FALSE	FALSE	FALSE	FALSE	FALSE	FALSE	FALSE	FALSE	FALSE	FALSE	FALSE	FALSE	FALSE	FALSE	FALSE	FALSE	FALSE	FALSE	FALSE	FALSE	FALSE	FALSE	FALSE	FALSE	FALSE	FALSE	FALSE	FALSE	FALSE	FALSE	FALSE	FALSE	FALSE	FALSE	FALSE	FALSE	FALSE	FALSE	FALSE	FALSE	FALSE
ferri-	FALSE	FALSE	FALSE	FALSE	FALSE	FALSE	FALSE	FALSE	FALSE	FALSE	FALSE	FALSE	FALSE	FALSE	FALSE	FALSE	FALSE	FALSE	FALSE	FALSE	FALSE	FALSE	FALSE	FALSE	FALSE	FALSE	FALSE	FALSE	FALSE	FALSE	FALSE	FALSE	FALSE	FALSE	FALSE	FALSE	FALSE	FALSE	FALSE	FALSE	FALSE	FALSE	FALSE	FALSE	FALSE	FALSE	FALSE	FALSE	FALSE
ferrian-	FALSE	FALSE	FALSE	FALSE	FALSE	FALSE	FALSE	FALSE	FALSE	FALSE	FALSE	FALSE	FALSE	FALSE	FALSE	FALSE	FALSE	FALSE	FALSE	FALSE	FALSE	FALSE	FALSE	FALSE	FALSE	FALSE	FALSE	FALSE	FALSE	FALSE	FALSE	FALSE	FALSE	FALSE	FALSE	FALSE	FALSE	FALSE	FALSE	FALSE	FALSE	FALSE	FALSE	FALSE	FALSE	FALSE	FALSE	FALSE	FALSE
fluor-	FALSE	FALSE	FALSE	FALSE	FALSE	FALSE	FALSE	FALSE	FALSE	FALSE	FALSE	FALSE	FALSE	FALSE	FALSE	FALSE	FALSE	FALSE	FALSE	FALSE	FALSE	FALSE	FALSE	FALSE	FALSE	FALSE	FALSE	FALSE	FALSE	FALSE	FALSE	FALSE	FALSE	FALSE	FALSE	FALSE	FALSE	FALSE	FALSE	FALSE	FALSE	FALSE	FALSE	FALSE	FALSE	FALSE	FALSE	FALSE	FALSE
hydro-	FALSE	FALSE	FALSE	FALSE	FALSE	FALSE	FALSE	FALSE	FALSE	FALSE	FALSE	FALSE	FALSE	FALSE	FALSE	FALSE	FALSE	FALSE	FALSE	FALSE	FALSE	FALSE	FALSE	FALSE	FALSE	FALSE	FALSE	FALSE	FALSE	FALSE	FALSE	FALSE	FALSE	FALSE	FALSE	FALSE	FALSE	FALSE	FALSE	FALSE	FALSE	FALSE	FALSE	FALSE	FALSE	FALSE	FALSE	FALSE	FALSE
lithian-	FALSE	FALSE	FALSE	FALSE	FALSE	FALSE	FALSE	FALSE	FALSE	FALSE	FALSE	FALSE	FALSE	FALSE	FALSE	FALSE	FALSE	FALSE	FALSE	FALSE	FALSE	FALSE	FALSE	FALSE	FALSE	FALSE	FALSE	FALSE	FALSE	FALSE	FALSE	FALSE	FALSE	FALSE	FALSE	FALSE	FALSE	FALSE	FALSE	FALSE	FALSE	FALSE	FALSE	FALSE	FALSE	FALSE	FALSE	FALSE	FALSE
manganese-	FALSE	FALSE	FALSE	FALSE	FALSE	FALSE	FALSE	FALSE	FALSE	FALSE	FALSE	FALSE	FALSE	FALSE	FALSE	FALSE	FALSE	FALSE	FALSE	FALSE	FALSE	FALSE	FALSE	FALSE	FALSE	FALSE	FALSE	FALSE	FALSE	FALSE	FALSE	FALSE	FALSE	FALSE	FALSE	FALSE	FALSE	FALSE	FALSE	FALSE	FALSE	FALSE	FALSE	FALSE	FALSE	FALSE	FALSE	FALSE	FALSE
manganoan-	FALSE	FALSE	FALSE	FALSE	FALSE	FALSE	FALSE	FALSE	FALSE	FALSE	FALSE	FALSE	FALSE	FALSE	FALSE	FALSE	FALSE	FALSE	FALSE	FALSE	FALSE	FALSE	FALSE	FALSE	FALSE	FALSE	FALSE	FALSE	FALSE	FALSE	FALSE	FALSE	FALSE	FALSE	FALSE	FALSE	FALSE	FALSE	FALSE	FALSE	FALSE	FALSE	FALSE	FALSE	FALSE	FALSE	FALSE	FALSE	FALSE
plumbian-	FALSE	FALSE	FALSE	FALSE	FALSE	FALSE	FALSE	FALSE	FALSE	FALSE	FALSE	FALSE	FALSE	FALSE	FALSE	FALSE	FALSE	FALSE	FALSE	FALSE	FALSE	FALSE	FALSE	FALSE	FALSE	FALSE	FALSE	FALSE	FALSE	FALSE	FALSE	FALSE	FALSE	FALSE	FALSE	FALSE	FALSE	FALSE	FALSE	FALSE	FALSE	FALSE	FALSE	FALSE	FALSE	FALSE	FALSE	FALSE	FALSE
titanium-	FALSE	FALSE	FALSE	FALSE	FALSE	FALSE	FALSE	FALSE	FALSE	FALSE	FALSE	FALSE	FALSE	FALSE	FALSE	FALSE	FALSE	FALSE	FALSE	FALSE	FALSE	FALSE	FALSE	FALSE	FALSE	FALSE	FALSE	FALSE	FALSE	FALSE	FALSE	FALSE	FALSE	FALSE	FALSE	FALSE	FALSE	FALSE	FALSE	FALSE	FALSE	FALSE	FALSE	FALSE	FALSE	FALSE	FALSE	FALSE	FALSE
titanian-	FALSE	FALSE	FALSE	FALSE	FALSE	FALSE	FALSE	FALSE	FALSE	FALSE	FALSE	FALSE	FALSE	FALSE	FALSE	FALSE	FALSE	FALSE	FALSE	FALSE	FALSE	FALSE	FALSE	FALSE	FALSE	FALSE	FALSE	FALSE	FALSE	FALSE	FALSE	FALSE	FALSE	FALSE	FALSE	FALSE	FALSE	FALSE	FALSE	FALSE	FALSE	FALSE	FALSE	FALSE	FALSE	FALSE	FALSE	FALSE	FALSE
potassium-	FALSE	FALSE	FALSE	FALSE	FALSE	FALSE	FALSE	FALSE	FALSE	FALSE	FALSE	FALSE	FALSE	FALSE	FALSE	FALSE	FALSE	FALSE	FALSE	FALSE	FALSE	potassium-	FALSE	FALSE	FALSE	FALSE	potassium-	FALSE	FALSE	FALSE	FALSE	FALSE	FALSE	FALSE	FALSE	FALSE	FALSE	FALSE	FALSE	potassium-	FALSE	FALSE	FALSE	FALSE	potassium-	FALSE	FALSE	FALSE	FALSE
potassian-	FALSE	FALSE	FALSE	FALSE	FALSE	FALSE	FALSE	potassian-	FALSE	potassian-	potassian-	potassian-	potassian-	FALSE	FALSE	FALSE	FALSE	FALSE	potassian-	potassian-	potassian-	FALSE	FALSE	potassian-	potassian-	FALSE	FALSE	potassian-	potassian-	potassian-	FALSE	FALSE	FALSE	FALSE	potassian-	potassian-	potassian-	potassian-	FALSE	FALSE	potassian-	FALSE	FALSE	FALSE	FALSE	FALSE	potassian-	FALSE	potassian-
subsilicic-	FALSE	FALSE	FALSE	FALSE	FALSE	FALSE	FALSE	FALSE	FALSE	FALSE	FALSE	FALSE	FALSE	FALSE	FALSE	FALSE	FALSE	FALSE	FALSE	FALSE	FALSE	FALSE	FALSE	FALSE	FALSE	FALSE	FALSE	FALSE	FALSE	FALSE	FALSE	FALSE	FALSE	FALSE	FALSE	FALSE	FALSE	FALSE	FALSE	FALSE	FALSE	FALSE	FALSE	FALSE	FALSE	FALSE	FALSE	FALSE	FALSE
zinc-	FALSE	FALSE	FALSE	FALSE	FALSE	FALSE	FALSE	FALSE	FALSE	FALSE	FALSE	FALSE	FALSE	FALSE	FALSE	FALSE	FALSE	FALSE	FALSE	FALSE	FALSE	FALSE	FALSE	FALSE	FALSE	FALSE	FALSE	FALSE	FALSE	FALSE	FALSE	FALSE	FALSE	FALSE	FALSE	FALSE	FALSE	FALSE	FALSE	FALSE	FALSE	FALSE	FALSE	FALSE	FALSE	FALSE	FALSE	FALSE	FALSE
zincian-	FALSE	FALSE	FALSE	FALSE	FALSE	FALSE	FALSE	FALSE	FALSE	FALSE	FALSE	FALSE	FALSE	FALSE	FALSE	FALSE	FALSE	FALSE	FALSE	FALSE	FALSE	FALSE	FALSE	FALSE	FALSE	FALSE	FALSE	FALSE	FALSE	FALSE	FALSE	FALSE	FALSE	FALSE	FALSE	FALSE	FALSE	FALSE	FALSE	FALSE	FALSE	FALSE	FALSE	FALSE	FALSE	FALSE	FALSE	FALSE	FALSE
nickeloan-	FALSE	FALSE	FALSE	FALSE	FALSE	FALSE	FALSE	FALSE	FALSE	FALSE	FALSE	FALSE	FALSE	FALSE	FALSE	FALSE	FALSE	FALSE	FALSE	FALSE	FALSE	FALSE	FALSE	FALSE	FALSE	FALSE	FALSE	FALSE	FALSE	FALSE	FALSE	FALSE	FALSE	FALSE	FALSE	FALSE	FALSE	FALSE	FALSE	FALSE	FALSE	FALSE	FALSE	FALSE	FALSE	FALSE	FALSE	FALSE	FALSE
barian-	FALSE	FALSE	FALSE	FALSE	FALSE	FALSE	FALSE	FALSE	FALSE	FALSE	FALSE	FALSE	FALSE	FALSE	FALSE	FALSE	FALSE	FALSE	FALSE	FALSE	FALSE	FALSE	FALSE	FALSE	FALSE	FALSE	FALSE	FALSE	FALSE	FALSE	FALSE	FALSE	FALSE	FALSE	FALSE	FALSE	FALSE	FALSE	FALSE	FALSE	FALSE	FALSE	FALSE	FALSE	FALSE	FALSE	FALSE	FALSE	FALSE
strontian-	FALSE	FALSE	FALSE	FALSE	FALSE	FALSE	FALSE	FALSE	FALSE	FALSE	FALSE	FALSE	FALSE	FALSE	FALSE	FALSE	FALSE	FALSE	FALSE	FALSE	FALSE	FALSE	FALSE	FALSE	FALSE	FALSE	FALSE	FALSE	FALSE	FALSE	FALSE	FALSE	FALSE	FALSE	FALSE	FALSE	FALSE	FALSE	FALSE	FALSE	FALSE	FALSE	FALSE	FALSE	FALSE	FALSE	FALSE	FALSE	FALSE
alumino	FALSE	FALSE	FALSE	FALSE	FALSE	FALSE	FALSE	FALSE	FALSE	FALSE	FALSE	FALSE	FALSE	FALSE	FALSE	FALSE	FALSE	FALSE	FALSE	FALSE	FALSE	FALSE	FALSE	FALSE	FALSE	FALSE	FALSE	FALSE	FALSE	FALSE	FALSE	FALSE	FALSE	FALSE	FALSE	FALSE	FALSE	FALSE	FALSE	FALSE	FALSE	FALSE	FALSE	FALSE	FALSE	FALSE	FALSE	FALSE	FALSE
alumino	FALSE	FALSE	FALSE	FALSE	FALSE	FALSE	FALSE	FALSE	FALSE	FALSE	FALSE	FALSE	FALSE	FALSE	FALSE	FALSE	FALSE	FALSE	FALSE	FALSE	FALSE	FALSE	FALSE	FALSE	FALSE	FALSE	FALSE	FALSE	FALSE	FALSE	FALSE	FALSE	FALSE	FALSE	FALSE	FALSE	FALSE	FALSE	FALSE	FALSE	FALSE	FALSE	FALSE	FALSE	FALSE	FALSE	FALSE	FALSE	FALSE
alumino	FALSE	FALSE	FALSE	FALSE	FALSE	FALSE	FALSE	FALSE	FALSE	FALSE	FALSE	FALSE	FALSE	FALSE	FALSE	FALSE	FALSE	FALSE	FALSE	FALSE	FALSE	FALSE	FALSE	FALSE	FALSE	FALSE	FALSE	FALSE	FALSE	FALSE	FALSE	FALSE	FALSE	FALSE	FALSE	FALSE	FALSE	FALSE	FALSE	FALSE	FALSE	FALSE	FALSE	FALSE	FALSE	FALSE	FALSE	FALSE	FALSE
sodium	FALSE	FALSE	FALSE	FALSE	FALSE	FALSE	FALSE	FALSE	FALSE	FALSE	FALSE	FALSE	FALSE	FALSE	FALSE	FALSE	FALSE	FALSE	FALSE	FALSE	FALSE	FALSE	FALSE	FALSE	FALSE	FALSE	FALSE	FALSE	FALSE	FALSE	FALSE	FALSE	FALSE	FALSE	FALSE	FALSE	FALSE	FALSE	FALSE	FALSE	FALSE	FALSE	FALSE	FALSE	FALSE	FALSE	FALSE	FALSE	FALSE
sodium	FALSE	FALSE	FALSE	FALSE	FALSE	FALSE	FALSE	FALSE	FALSE	FALSE	FALSE	FALSE	FALSE	FALSE	FALSE	FALSE	FALSE	FALSE	FALSE	FALSE	FALSE	FALSE	FALSE	FALSE	FALSE	FALSE	FALSE	FALSE	FALSE	FALSE	FALSE	FALSE	FALSE	FALSE	FALSE	FALSE	FALSE	FALSE	FALSE	FALSE	FALSE	FALSE	FALSE	FALSE	FALSE	FALSE	FALSE	FALSE	FALSE
sodian	FALSE	FALSE	sodian	FALSE	FALSE	FALSE	FALSE	FALSE	FALSE	FALSE	FALSE	FALSE	FALSE	FALSE	FALSE	FALSE	FALSE	FALSE	FALSE	FALSE	FALSE	FALSE	FALSE	FALSE	FALSE	FALSE	FALSE	FALSE	FALSE	FALSE	FALSE	FALSE	FALSE	FALSE	FALSE	FALSE	FALSE	FALSE	FALSE	FALSE	FALSE	FALSE	FALSE	FALSE	FALSE	FALSE	FALSE	FALSE	FALSE
sodian	FALSE	FALSE	FALSE	FALSE	FALSE	FALSE	FALSE	FALSE	FALSE	FALSE	FALSE	FALSE	FALSE	FALSE	FALSE	sodian	sodian	FALSE	FALSE	FALSE	FALSE	FALSE	FALSE	FALSE	FALSE	FALSE	FALSE	FALSE	FALSE	FALSE	FALSE	FALSE	FALSE	FALSE	FALSE	FALSE	FALSE	FALSE	FALSE	FALSE	FALSE	FALSE	FALSE	FALSE	FALSE	FALSE	FALSE	FALSE	FALSE
subcalcic	FALSE	FALSE	FALSE	FALSE	FALSE	FALSE	FALSE	FALSE	FALSE	FALSE	FALSE	FALSE	FALSE	FALSE	FALSE	subcalcic	subcalcic	FALSE	FALSE	FALSE	FALSE	FALSE	FALSE	FALSE	FALSE	FALSE	FALSE	FALSE	FALSE	FALSE	FALSE	FALSE	FALSE	FALSE	FALSE	FALSE	FALSE	FALSE	FALSE	FALSE	FALSE	FALSE	FALSE	FALSE	FALSE	FALSE	FALSE	FALSE	FALSE
calcian	FALSE	FALSE	FALSE	FALSE	FALSE	FALSE	FALSE	FALSE	FALSE	FALSE	FALSE	FALSE	FALSE	FALSE	FALSE	FALSE	FALSE	FALSE	FALSE	FALSE	FALSE	FALSE	FALSE	FALSE	FALSE	FALSE	FALSE	FALSE	FALSE	FALSE	FALSE	FALSE	FALSE	FALSE	FALSE	FALSE	FALSE	FALSE	FALSE	FALSE	FALSE	FALSE	FALSE	FALSE	FALSE	FALSE	FALSE	FALSE	FALSE
calcian	FALSE	FALSE	FALSE	FALSE	FALSE	FALSE	FALSE	FALSE	FALSE	FALSE	FALSE	FALSE	FALSE	FALSE	FALSE	FALSE	FALSE	FALSE	FALSE	FALSE	FALSE	FALSE	FALSE	FALSE	FALSE	FALSE	FALSE	FALSE	FALSE	FALSE	FALSE	FALSE	FALSE	FALSE	FALSE	FALSE	FALSE	FALSE	FALSE	FALSE	FALSE	FALSE	FALSE	FALSE	FALSE	FALSE	FALSE	FALSE	FALSE
silica-poor	FALSE	FALSE	FALSE	FALSE	FALSE	FALSE	FALSE	FALSE	FALSE	FALSE	FALSE	FALSE	FALSE	FALSE	FALSE	FALSE	FALSE	FALSE	FALSE	FALSE	FALSE	FALSE	FALSE	FALSE	FALSE	FALSE	FALSE	FALSE	FALSE	FALSE	FALSE	FALSE	FALSE	FALSE	FALSE	FALSE	FALSE	FALSE	FALSE	FALSE	FALSE	FALSE	FALSE	FALSE	FALSE	FALSE	FALSE	FALSE	FALSE
Part 16. Select TRUE prefixes and tidy	ЛОЖЬЛОЖЬЛОЖЬЛОЖЬЛОЖЬЛОЖЬЛОЖЬЛОЖЬЛОЖЬЛОЖЬЛОЖЬЛОЖЬЛОЖЬЛОЖЬЛОЖЬЛОЖЬЛОЖЬЛОЖЬЛОЖЬЛОЖЬ	ЛОЖЬЛОЖЬЛОЖЬЛОЖЬЛОЖЬЛОЖЬЛОЖЬЛОЖЬЛОЖЬЛОЖЬЛОЖЬЛОЖЬЛОЖЬЛОЖЬЛОЖЬЛОЖЬЛОЖЬЛОЖЬЛОЖЬЛОЖЬ	ЛОЖЬЛОЖЬЛОЖЬЛОЖЬЛОЖЬЛОЖЬЛОЖЬЛОЖЬЛОЖЬЛОЖЬЛОЖЬЛОЖЬЛОЖЬЛОЖЬЛОЖЬЛОЖЬЛОЖЬЛОЖЬЛОЖЬЛОЖЬ	ЛОЖЬЛОЖЬЛОЖЬЛОЖЬЛОЖЬЛОЖЬЛОЖЬЛОЖЬЛОЖЬЛОЖЬЛОЖЬЛОЖЬЛОЖЬЛОЖЬЛОЖЬЛОЖЬЛОЖЬЛОЖЬЛОЖЬЛОЖЬ	ЛОЖЬЛОЖЬЛОЖЬЛОЖЬЛОЖЬЛОЖЬЛОЖЬЛОЖЬЛОЖЬЛОЖЬЛОЖЬЛОЖЬЛОЖЬЛОЖЬЛОЖЬЛОЖЬЛОЖЬЛОЖЬЛОЖЬЛОЖЬ	ЛОЖЬЛОЖЬЛОЖЬЛОЖЬЛОЖЬЛОЖЬЛОЖЬЛОЖЬЛОЖЬЛОЖЬЛОЖЬЛОЖЬЛОЖЬЛОЖЬЛОЖЬЛОЖЬЛОЖЬЛОЖЬЛОЖЬЛОЖЬ	ЛОЖЬЛОЖЬЛОЖЬЛОЖЬЛОЖЬЛОЖЬЛОЖЬЛОЖЬЛОЖЬЛОЖЬЛОЖЬЛОЖЬЛОЖЬЛОЖЬЛОЖЬЛОЖЬЛОЖЬЛОЖЬЛОЖЬЛОЖЬ	ЛОЖЬЛОЖЬЛОЖЬЛОЖЬЛОЖЬЛОЖЬЛОЖЬЛОЖЬЛОЖЬЛОЖЬЛОЖЬЛОЖЬЛОЖЬЛОЖЬЛОЖЬЛОЖЬpotassian-ЛОЖЬЛОЖЬЛОЖЬ	ЛОЖЬЛОЖЬЛОЖЬЛОЖЬЛОЖЬЛОЖЬЛОЖЬЛОЖЬЛОЖЬЛОЖЬЛОЖЬЛОЖЬЛОЖЬЛОЖЬЛОЖЬЛОЖЬЛОЖЬЛОЖЬЛОЖЬЛОЖЬ	ЛОЖЬЛОЖЬЛОЖЬЛОЖЬЛОЖЬЛОЖЬЛОЖЬЛОЖЬЛОЖЬЛОЖЬЛОЖЬЛОЖЬЛОЖЬЛОЖЬЛОЖЬЛОЖЬpotassian-ЛОЖЬЛОЖЬЛОЖЬ	ЛОЖЬЛОЖЬЛОЖЬЛОЖЬЛОЖЬЛОЖЬЛОЖЬЛОЖЬЛОЖЬЛОЖЬЛОЖЬЛОЖЬЛОЖЬЛОЖЬЛОЖЬЛОЖЬpotassian-ЛОЖЬЛОЖЬЛОЖЬ	ЛОЖЬЛОЖЬЛОЖЬЛОЖЬЛОЖЬЛОЖЬЛОЖЬЛОЖЬЛОЖЬЛОЖЬЛОЖЬЛОЖЬЛОЖЬЛОЖЬЛОЖЬЛОЖЬpotassian-ЛОЖЬЛОЖЬЛОЖЬ	ЛОЖЬЛОЖЬЛОЖЬЛОЖЬЛОЖЬЛОЖЬЛОЖЬЛОЖЬЛОЖЬЛОЖЬЛОЖЬЛОЖЬЛОЖЬЛОЖЬЛОЖЬЛОЖЬpotassian-ЛОЖЬЛОЖЬЛОЖЬ	ЛОЖЬЛОЖЬЛОЖЬЛОЖЬЛОЖЬЛОЖЬЛОЖЬЛОЖЬЛОЖЬЛОЖЬЛОЖЬЛОЖЬЛОЖЬЛОЖЬЛОЖЬЛОЖЬЛОЖЬЛОЖЬЛОЖЬЛОЖЬ	ЛОЖЬЛОЖЬЛОЖЬЛОЖЬЛОЖЬЛОЖЬЛОЖЬЛОЖЬЛОЖЬЛОЖЬЛОЖЬЛОЖЬЛОЖЬЛОЖЬЛОЖЬЛОЖЬЛОЖЬЛОЖЬЛОЖЬЛОЖЬ	ЛОЖЬЛОЖЬЛОЖЬЛОЖЬЛОЖЬЛОЖЬЛОЖЬЛОЖЬЛОЖЬЛОЖЬЛОЖЬЛОЖЬЛОЖЬЛОЖЬЛОЖЬЛОЖЬЛОЖЬЛОЖЬЛОЖЬЛОЖЬ	ЛОЖЬЛОЖЬЛОЖЬЛОЖЬЛОЖЬЛОЖЬЛОЖЬЛОЖЬЛОЖЬЛОЖЬЛОЖЬЛОЖЬЛОЖЬЛОЖЬЛОЖЬЛОЖЬЛОЖЬЛОЖЬЛОЖЬЛОЖЬ	ЛОЖЬЛОЖЬЛОЖЬЛОЖЬЛОЖЬЛОЖЬЛОЖЬЛОЖЬЛОЖЬЛОЖЬЛОЖЬЛОЖЬЛОЖЬЛОЖЬЛОЖЬЛОЖЬЛОЖЬЛОЖЬЛОЖЬЛОЖЬ	ЛОЖЬЛОЖЬЛОЖЬЛОЖЬЛОЖЬЛОЖЬЛОЖЬЛОЖЬЛОЖЬЛОЖЬЛОЖЬЛОЖЬЛОЖЬЛОЖЬЛОЖЬЛОЖЬpotassian-ЛОЖЬЛОЖЬЛОЖЬ	ЛОЖЬЛОЖЬЛОЖЬЛОЖЬЛОЖЬЛОЖЬЛОЖЬЛОЖЬЛОЖЬЛОЖЬЛОЖЬЛОЖЬЛОЖЬЛОЖЬЛОЖЬЛОЖЬpotassian-ЛОЖЬЛОЖЬЛОЖЬ	ЛОЖЬЛОЖЬЛОЖЬЛОЖЬЛОЖЬЛОЖЬЛОЖЬЛОЖЬЛОЖЬЛОЖЬЛОЖЬЛОЖЬЛОЖЬЛОЖЬЛОЖЬЛОЖЬpotassian-ЛОЖЬЛОЖЬЛОЖЬ	ЛОЖЬЛОЖЬЛОЖЬЛОЖЬЛОЖЬЛОЖЬЛОЖЬЛОЖЬЛОЖЬЛОЖЬЛОЖЬЛОЖЬЛОЖЬЛОЖЬЛОЖЬpotassium-ЛОЖЬЛОЖЬЛОЖЬЛОЖЬ	ЛОЖЬЛОЖЬЛОЖЬЛОЖЬЛОЖЬЛОЖЬЛОЖЬЛОЖЬЛОЖЬЛОЖЬЛОЖЬЛОЖЬЛОЖЬЛОЖЬЛОЖЬЛОЖЬЛОЖЬЛОЖЬЛОЖЬЛОЖЬ	ЛОЖЬЛОЖЬЛОЖЬЛОЖЬЛОЖЬЛОЖЬЛОЖЬЛОЖЬЛОЖЬЛОЖЬЛОЖЬЛОЖЬЛОЖЬЛОЖЬЛОЖЬЛОЖЬpotassian-ЛОЖЬЛОЖЬЛОЖЬ	ЛОЖЬЛОЖЬЛОЖЬЛОЖЬЛОЖЬЛОЖЬЛОЖЬЛОЖЬЛОЖЬЛОЖЬЛОЖЬЛОЖЬЛОЖЬЛОЖЬЛОЖЬЛОЖЬpotassian-ЛОЖЬЛОЖЬЛОЖЬ	ЛОЖЬЛОЖЬЛОЖЬЛОЖЬЛОЖЬЛОЖЬЛОЖЬЛОЖЬЛОЖЬЛОЖЬЛОЖЬЛОЖЬЛОЖЬЛОЖЬЛОЖЬЛОЖЬЛОЖЬЛОЖЬЛОЖЬЛОЖЬ	ЛОЖЬЛОЖЬЛОЖЬЛОЖЬЛОЖЬЛОЖЬЛОЖЬЛОЖЬЛОЖЬЛОЖЬЛОЖЬЛОЖЬЛОЖЬЛОЖЬЛОЖЬpotassium-ЛОЖЬЛОЖЬЛОЖЬЛОЖЬ	ЛОЖЬЛОЖЬЛОЖЬЛОЖЬЛОЖЬЛОЖЬЛОЖЬЛОЖЬЛОЖЬЛОЖЬЛОЖЬЛОЖЬЛОЖЬЛОЖЬЛОЖЬЛОЖЬpotassian-ЛОЖЬЛОЖЬЛОЖЬ	ЛОЖЬЛОЖЬЛОЖЬЛОЖЬЛОЖЬЛОЖЬЛОЖЬЛОЖЬЛОЖЬЛОЖЬЛОЖЬЛОЖЬЛОЖЬЛОЖЬЛОЖЬЛОЖЬpotassian-ЛОЖЬЛОЖЬЛОЖЬ	ЛОЖЬЛОЖЬЛОЖЬЛОЖЬЛОЖЬЛОЖЬЛОЖЬЛОЖЬЛОЖЬЛОЖЬЛОЖЬЛОЖЬЛОЖЬЛОЖЬЛОЖЬЛОЖЬpotassian-ЛОЖЬЛОЖЬЛОЖЬ	ЛОЖЬЛОЖЬЛОЖЬЛОЖЬЛОЖЬЛОЖЬЛОЖЬЛОЖЬЛОЖЬЛОЖЬЛОЖЬЛОЖЬЛОЖЬЛОЖЬЛОЖЬЛОЖЬЛОЖЬЛОЖЬЛОЖЬЛОЖЬ	ЛОЖЬЛОЖЬЛОЖЬЛОЖЬЛОЖЬЛОЖЬЛОЖЬЛОЖЬЛОЖЬЛОЖЬЛОЖЬЛОЖЬЛОЖЬЛОЖЬЛОЖЬЛОЖЬЛОЖЬЛОЖЬЛОЖЬЛОЖЬ	ЛОЖЬЛОЖЬЛОЖЬЛОЖЬЛОЖЬЛОЖЬЛОЖЬЛОЖЬЛОЖЬЛОЖЬЛОЖЬЛОЖЬЛОЖЬЛОЖЬЛОЖЬЛОЖЬЛОЖЬЛОЖЬЛОЖЬЛОЖЬ	ЛОЖЬЛОЖЬЛОЖЬЛОЖЬЛОЖЬЛОЖЬЛОЖЬЛОЖЬЛОЖЬЛОЖЬЛОЖЬЛОЖЬЛОЖЬЛОЖЬЛОЖЬЛОЖЬЛОЖЬЛОЖЬЛОЖЬЛОЖЬ	ЛОЖЬЛОЖЬЛОЖЬЛОЖЬЛОЖЬЛОЖЬЛОЖЬЛОЖЬЛОЖЬЛОЖЬЛОЖЬЛОЖЬЛОЖЬЛОЖЬЛОЖЬЛОЖЬpotassian-ЛОЖЬЛОЖЬЛОЖЬ	ЛОЖЬЛОЖЬЛОЖЬЛОЖЬЛОЖЬЛОЖЬЛОЖЬЛОЖЬЛОЖЬЛОЖЬЛОЖЬЛОЖЬЛОЖЬЛОЖЬЛОЖЬЛОЖЬpotassian-ЛОЖЬЛОЖЬЛОЖЬ	ЛОЖЬЛОЖЬЛОЖЬЛОЖЬЛОЖЬЛОЖЬЛОЖЬЛОЖЬЛОЖЬЛОЖЬЛОЖЬЛОЖЬЛОЖЬЛОЖЬЛОЖЬЛОЖЬpotassian-ЛОЖЬЛОЖЬЛОЖЬ	ЛОЖЬЛОЖЬЛОЖЬЛОЖЬЛОЖЬЛОЖЬЛОЖЬЛОЖЬЛОЖЬЛОЖЬЛОЖЬЛОЖЬЛОЖЬЛОЖЬЛОЖЬЛОЖЬpotassian-ЛОЖЬЛОЖЬЛОЖЬ	ЛОЖЬЛОЖЬЛОЖЬЛОЖЬЛОЖЬЛОЖЬЛОЖЬЛОЖЬЛОЖЬЛОЖЬЛОЖЬЛОЖЬЛОЖЬЛОЖЬЛОЖЬЛОЖЬЛОЖЬЛОЖЬЛОЖЬЛОЖЬ	ЛОЖЬЛОЖЬЛОЖЬЛОЖЬЛОЖЬЛОЖЬЛОЖЬЛОЖЬЛОЖЬЛОЖЬЛОЖЬЛОЖЬЛОЖЬЛОЖЬЛОЖЬpotassium-ЛОЖЬЛОЖЬЛОЖЬЛОЖЬ	ЛОЖЬЛОЖЬЛОЖЬЛОЖЬЛОЖЬЛОЖЬЛОЖЬЛОЖЬЛОЖЬЛОЖЬЛОЖЬЛОЖЬЛОЖЬЛОЖЬЛОЖЬЛОЖЬpotassian-ЛОЖЬЛОЖЬЛОЖЬ	ЛОЖЬЛОЖЬЛОЖЬЛОЖЬЛОЖЬЛОЖЬЛОЖЬЛОЖЬЛОЖЬЛОЖЬЛОЖЬЛОЖЬЛОЖЬЛОЖЬЛОЖЬЛОЖЬЛОЖЬЛОЖЬЛОЖЬЛОЖЬ	ЛОЖЬЛОЖЬЛОЖЬЛОЖЬЛОЖЬЛОЖЬЛОЖЬЛОЖЬЛОЖЬЛОЖЬЛОЖЬЛОЖЬЛОЖЬЛОЖЬЛОЖЬЛОЖЬЛОЖЬЛОЖЬЛОЖЬЛОЖЬ	ЛОЖЬЛОЖЬЛОЖЬЛОЖЬЛОЖЬЛОЖЬЛОЖЬЛОЖЬЛОЖЬЛОЖЬЛОЖЬЛОЖЬЛОЖЬЛОЖЬЛОЖЬЛОЖЬЛОЖЬЛОЖЬЛОЖЬЛОЖЬ	ЛОЖЬЛОЖЬЛОЖЬЛОЖЬЛОЖЬЛОЖЬЛОЖЬЛОЖЬЛОЖЬЛОЖЬЛОЖЬЛОЖЬЛОЖЬЛОЖЬЛОЖЬpotassium-ЛОЖЬЛОЖЬЛОЖЬЛОЖЬ	ЛОЖЬЛОЖЬЛОЖЬЛОЖЬЛОЖЬЛОЖЬЛОЖЬЛОЖЬЛОЖЬЛОЖЬЛОЖЬЛОЖЬЛОЖЬЛОЖЬЛОЖЬЛОЖЬЛОЖЬЛОЖЬЛОЖЬЛОЖЬ	ЛОЖЬЛОЖЬЛОЖЬЛОЖЬЛОЖЬЛОЖЬЛОЖЬЛОЖЬЛОЖЬЛОЖЬЛОЖЬЛОЖЬЛОЖЬЛОЖЬЛОЖЬЛОЖЬpotassian-ЛОЖЬЛОЖЬЛОЖЬ	ЛОЖЬЛОЖЬЛОЖЬЛОЖЬЛОЖЬЛОЖЬЛОЖЬЛОЖЬЛОЖЬЛОЖЬЛОЖЬЛОЖЬЛОЖЬЛОЖЬЛОЖЬЛОЖЬЛОЖЬЛОЖЬЛОЖЬЛОЖЬ	ЛОЖЬЛОЖЬЛОЖЬЛОЖЬЛОЖЬЛОЖЬЛОЖЬЛОЖЬЛОЖЬЛОЖЬЛОЖЬЛОЖЬЛОЖЬЛОЖЬЛОЖЬЛОЖЬpotassian-ЛОЖЬЛОЖЬЛОЖЬ
Final adjectival modifier								potassian-		potassian-	potassian-	potassian-	potassian-						potassian-	potassian-	potassian-	potassium-		potassian-	potassian-		potassium-	potassian-	potassian-	potassian-					potassian-	potassian-	potassian-	potassian-		potassium-	potassian-				potassium-		potassian-		potassian-
	ЛОЖЬЛОЖЬЛОЖЬЛОЖЬЛОЖЬЛОЖЬЛОЖЬЛОЖЬЛОЖЬ	ЛОЖЬЛОЖЬЛОЖЬЛОЖЬЛОЖЬЛОЖЬЛОЖЬЛОЖЬЛОЖЬ	ЛОЖЬЛОЖЬЛОЖЬЛОЖЬЛОЖЬЛОЖЬЛОЖЬЛОЖЬЛОЖЬ	ЛОЖЬЛОЖЬЛОЖЬЛОЖЬЛОЖЬЛОЖЬЛОЖЬЛОЖЬЛОЖЬ	ЛОЖЬЛОЖЬЛОЖЬЛОЖЬЛОЖЬЛОЖЬЛОЖЬЛОЖЬЛОЖЬ	ЛОЖЬЛОЖЬЛОЖЬЛОЖЬЛОЖЬЛОЖЬЛОЖЬЛОЖЬЛОЖЬ	ЛОЖЬЛОЖЬЛОЖЬЛОЖЬЛОЖЬЛОЖЬЛОЖЬЛОЖЬЛОЖЬ	ЛОЖЬЛОЖЬЛОЖЬЛОЖЬЛОЖЬЛОЖЬЛОЖЬЛОЖЬЛОЖЬ	ЛОЖЬЛОЖЬЛОЖЬЛОЖЬЛОЖЬЛОЖЬЛОЖЬЛОЖЬЛОЖЬ	ЛОЖЬЛОЖЬЛОЖЬЛОЖЬЛОЖЬЛОЖЬЛОЖЬЛОЖЬЛОЖЬ	ЛОЖЬЛОЖЬЛОЖЬЛОЖЬЛОЖЬЛОЖЬЛОЖЬЛОЖЬЛОЖЬ	ЛОЖЬЛОЖЬЛОЖЬЛОЖЬЛОЖЬЛОЖЬЛОЖЬЛОЖЬЛОЖЬ	ЛОЖЬЛОЖЬЛОЖЬЛОЖЬЛОЖЬЛОЖЬЛОЖЬЛОЖЬЛОЖЬ	ЛОЖЬЛОЖЬЛОЖЬЛОЖЬЛОЖЬЛОЖЬЛОЖЬЛОЖЬЛОЖЬ	ЛОЖЬЛОЖЬЛОЖЬЛОЖЬЛОЖЬЛОЖЬЛОЖЬЛОЖЬЛОЖЬ	ЛОЖЬЛОЖЬЛОЖЬsubcalcic sodian ЛОЖЬЛОЖЬЛОЖЬЛОЖЬ	ЛОЖЬЛОЖЬЛОЖЬsubcalcic sodian ЛОЖЬЛОЖЬЛОЖЬЛОЖЬ	ЛОЖЬЛОЖЬЛОЖЬЛОЖЬЛОЖЬЛОЖЬЛОЖЬЛОЖЬЛОЖЬ	ЛОЖЬЛОЖЬЛОЖЬЛОЖЬЛОЖЬЛОЖЬЛОЖЬЛОЖЬЛОЖЬ	ЛОЖЬЛОЖЬЛОЖЬЛОЖЬЛОЖЬЛОЖЬЛОЖЬЛОЖЬЛОЖЬ	ЛОЖЬЛОЖЬЛОЖЬЛОЖЬЛОЖЬЛОЖЬЛОЖЬЛОЖЬЛОЖЬ	ЛОЖЬЛОЖЬЛОЖЬЛОЖЬЛОЖЬЛОЖЬЛОЖЬЛОЖЬЛОЖЬ	ЛОЖЬЛОЖЬЛОЖЬЛОЖЬЛОЖЬЛОЖЬЛОЖЬЛОЖЬЛОЖЬ	ЛОЖЬЛОЖЬЛОЖЬЛОЖЬЛОЖЬЛОЖЬЛОЖЬЛОЖЬЛОЖЬ	ЛОЖЬЛОЖЬЛОЖЬЛОЖЬЛОЖЬЛОЖЬЛОЖЬЛОЖЬЛОЖЬ	ЛОЖЬЛОЖЬЛОЖЬЛОЖЬЛОЖЬЛОЖЬЛОЖЬЛОЖЬЛОЖЬ	ЛОЖЬЛОЖЬЛОЖЬЛОЖЬЛОЖЬЛОЖЬЛОЖЬЛОЖЬЛОЖЬ	ЛОЖЬЛОЖЬЛОЖЬЛОЖЬЛОЖЬЛОЖЬЛОЖЬЛОЖЬЛОЖЬ	ЛОЖЬЛОЖЬЛОЖЬЛОЖЬЛОЖЬЛОЖЬЛОЖЬЛОЖЬЛОЖЬ	ЛОЖЬЛОЖЬЛОЖЬЛОЖЬЛОЖЬЛОЖЬЛОЖЬЛОЖЬЛОЖЬ	ЛОЖЬЛОЖЬЛОЖЬЛОЖЬЛОЖЬЛОЖЬЛОЖЬЛОЖЬЛОЖЬ	ЛОЖЬЛОЖЬЛОЖЬЛОЖЬЛОЖЬЛОЖЬЛОЖЬЛОЖЬЛОЖЬ	ЛОЖЬЛОЖЬЛОЖЬЛОЖЬЛОЖЬЛОЖЬЛОЖЬЛОЖЬЛОЖЬ	ЛОЖЬЛОЖЬЛОЖЬЛОЖЬЛОЖЬЛОЖЬЛОЖЬЛОЖЬЛОЖЬ	ЛОЖЬЛОЖЬЛОЖЬЛОЖЬЛОЖЬЛОЖЬЛОЖЬЛОЖЬЛОЖЬ	ЛОЖЬЛОЖЬЛОЖЬЛОЖЬЛОЖЬЛОЖЬЛОЖЬЛОЖЬЛОЖЬ	ЛОЖЬЛОЖЬЛОЖЬЛОЖЬЛОЖЬЛОЖЬЛОЖЬЛОЖЬЛОЖЬ	ЛОЖЬЛОЖЬЛОЖЬЛОЖЬЛОЖЬЛОЖЬЛОЖЬЛОЖЬЛОЖЬ	ЛОЖЬЛОЖЬЛОЖЬЛОЖЬЛОЖЬЛОЖЬЛОЖЬЛОЖЬЛОЖЬ	ЛОЖЬЛОЖЬЛОЖЬЛОЖЬЛОЖЬЛОЖЬЛОЖЬЛОЖЬЛОЖЬ	ЛОЖЬЛОЖЬЛОЖЬЛОЖЬЛОЖЬЛОЖЬЛОЖЬЛОЖЬЛОЖЬ	ЛОЖЬЛОЖЬЛОЖЬЛОЖЬЛОЖЬЛОЖЬЛОЖЬЛОЖЬЛОЖЬ	ЛОЖЬЛОЖЬЛОЖЬЛОЖЬЛОЖЬЛОЖЬЛОЖЬЛОЖЬЛОЖЬ	ЛОЖЬЛОЖЬЛОЖЬЛОЖЬЛОЖЬЛОЖЬЛОЖЬЛОЖЬЛОЖЬ	ЛОЖЬЛОЖЬЛОЖЬЛОЖЬЛОЖЬЛОЖЬЛОЖЬЛОЖЬЛОЖЬ	ЛОЖЬЛОЖЬЛОЖЬЛОЖЬЛОЖЬЛОЖЬЛОЖЬЛОЖЬЛОЖЬ	ЛОЖЬЛОЖЬЛОЖЬЛОЖЬЛОЖЬЛОЖЬЛОЖЬЛОЖЬЛОЖЬ	ЛОЖЬЛОЖЬЛОЖЬЛОЖЬЛОЖЬЛОЖЬЛОЖЬЛОЖЬЛОЖЬ	ЛОЖЬЛОЖЬЛОЖЬЛОЖЬЛОЖЬЛОЖЬЛОЖЬЛОЖЬЛОЖЬ
Final prefix																subcalcic sodian	subcalcic sodian
Fe-Mg-Mn monoclinic prefix			sodian
Get rid of empty cells 1
Get rid of empty cells 2								potassian-		potassian-	potassian-	potassian-	potassian-			subcalcic sodian	subcalcic sodian		potassian-	potassian-	potassian-	potassium-		potassian-	potassian-		potassium-	potassian-	potassian-	potassian-					potassian-	potassian-	potassian-	potassian-		potassium-	potassian-				potassium-		potassian-		potassian-
Get rid of empty monoclinic cells 1
Get rid of empty monoclinic cells 2			sodian					potassian-		potassian-	potassian-	potassian-	potassian-						potassian-	potassian-	potassian-	potassium-		potassian-	potassian-		potassium-	potassian-	potassian-	potassian-					potassian-	potassian-	potassian-	potassian-		potassium-	potassian-				potassium-		potassian-		potassian-
Part 17. Non IMA scheme amphs.
Sum of oxides	95.2	96.2	94.98	99.39	97.38	97.64	102.369	98.26	97.72	94.4	97.9933	97.78	97.74	97.73	97.72	101.809	97.75	97.77	97.74	97.74	97.77	98.2144	97.68	98.2926	97.77	97.75	97.77	97.76	97.6783	97.75	97.74	97.74	97.76	97.75	98.7261	96.68	97.77	97.76	97.75	97.75	98.6367	97.75	97.73	97.71	97.78	97.76	97.73	97.7	98.5624
? holmquistite	FALSE	FALSE	FALSE	FALSE	FALSE	FALSE	FALSE	FALSE	FALSE	FALSE	FALSE	FALSE	FALSE	FALSE	FALSE	FALSE	FALSE	FALSE	FALSE	FALSE	FALSE	FALSE	FALSE	FALSE	FALSE	FALSE	FALSE	FALSE	FALSE	FALSE	FALSE	FALSE	FALSE	FALSE	FALSE	FALSE	FALSE	FALSE	FALSE	FALSE	FALSE	FALSE	FALSE	FALSE	FALSE	FALSE	FALSE	FALSE	FALSE
? joesmithite	FALSE	FALSE	FALSE	FALSE	FALSE	FALSE	FALSE	FALSE	FALSE	FALSE	FALSE	FALSE	FALSE	FALSE	FALSE	FALSE	FALSE	FALSE	FALSE	FALSE	FALSE	FALSE	FALSE	FALSE	FALSE	FALSE	FALSE	FALSE	FALSE	FALSE	FALSE	FALSE	FALSE	FALSE	FALSE	FALSE	FALSE	FALSE	FALSE	FALSE	FALSE	FALSE	FALSE	FALSE	FALSE	FALSE	FALSE	FALSE	FALSE
? leakeite	FALSE	FALSE	FALSE	FALSE	FALSE	FALSE	FALSE	FALSE	FALSE	FALSE	FALSE	FALSE	FALSE	FALSE	FALSE	FALSE	FALSE	FALSE	FALSE	FALSE	FALSE	FALSE	FALSE	FALSE	FALSE	FALSE	FALSE	FALSE	FALSE	FALSE	FALSE	FALSE	FALSE	FALSE	FALSE	FALSE	FALSE	FALSE	FALSE	FALSE	FALSE	FALSE	FALSE	FALSE	FALSE	FALSE	FALSE	FALSE	FALSE
? kornite	FALSE	FALSE	FALSE	FALSE	FALSE	FALSE	FALSE	FALSE	FALSE	FALSE	FALSE	FALSE	FALSE	FALSE	FALSE	FALSE	FALSE	FALSE	FALSE	FALSE	FALSE	FALSE	FALSE	FALSE	FALSE	FALSE	FALSE	FALSE	FALSE	FALSE	FALSE	FALSE	FALSE	FALSE	FALSE	FALSE	FALSE	FALSE	FALSE	FALSE	FALSE	FALSE	FALSE	FALSE	FALSE	FALSE	FALSE	FALSE	FALSE
	ЛОЖЬЛОЖЬЛОЖЬЛОЖЬ	ЛОЖЬЛОЖЬЛОЖЬЛОЖЬ	ЛОЖЬЛОЖЬЛОЖЬЛОЖЬ	ЛОЖЬЛОЖЬЛОЖЬЛОЖЬ	ЛОЖЬЛОЖЬЛОЖЬЛОЖЬ	ЛОЖЬЛОЖЬЛОЖЬЛОЖЬ	ЛОЖЬЛОЖЬЛОЖЬЛОЖЬ	ЛОЖЬЛОЖЬЛОЖЬЛОЖЬ	ЛОЖЬЛОЖЬЛОЖЬЛОЖЬ	ЛОЖЬЛОЖЬЛОЖЬЛОЖЬ	ЛОЖЬЛОЖЬЛОЖЬЛОЖЬ	ЛОЖЬЛОЖЬЛОЖЬЛОЖЬ	ЛОЖЬЛОЖЬЛОЖЬЛОЖЬ	ЛОЖЬЛОЖЬЛОЖЬЛОЖЬ	ЛОЖЬЛОЖЬЛОЖЬЛОЖЬ	ЛОЖЬЛОЖЬЛОЖЬЛОЖЬ	ЛОЖЬЛОЖЬЛОЖЬЛОЖЬ	ЛОЖЬЛОЖЬЛОЖЬЛОЖЬ	ЛОЖЬЛОЖЬЛОЖЬЛОЖЬ	ЛОЖЬЛОЖЬЛОЖЬЛОЖЬ	ЛОЖЬЛОЖЬЛОЖЬЛОЖЬ	ЛОЖЬЛОЖЬЛОЖЬЛОЖЬ	ЛОЖЬЛОЖЬЛОЖЬЛОЖЬ	ЛОЖЬЛОЖЬЛОЖЬЛОЖЬ	ЛОЖЬЛОЖЬЛОЖЬЛОЖЬ	ЛОЖЬЛОЖЬЛОЖЬЛОЖЬ	ЛОЖЬЛОЖЬЛОЖЬЛОЖЬ	ЛОЖЬЛОЖЬЛОЖЬЛОЖЬ	ЛОЖЬЛОЖЬЛОЖЬЛОЖЬ	ЛОЖЬЛОЖЬЛОЖЬЛОЖЬ	ЛОЖЬЛОЖЬЛОЖЬЛОЖЬ	ЛОЖЬЛОЖЬЛОЖЬЛОЖЬ	ЛОЖЬЛОЖЬЛОЖЬЛОЖЬ	ЛОЖЬЛОЖЬЛОЖЬЛОЖЬ	ЛОЖЬЛОЖЬЛОЖЬЛОЖЬ	ЛОЖЬЛОЖЬЛОЖЬЛОЖЬ	ЛОЖЬЛОЖЬЛОЖЬЛОЖЬ	ЛОЖЬЛОЖЬЛОЖЬЛОЖЬ	ЛОЖЬЛОЖЬЛОЖЬЛОЖЬ	ЛОЖЬЛОЖЬЛОЖЬЛОЖЬ	ЛОЖЬЛОЖЬЛОЖЬЛОЖЬ	ЛОЖЬЛОЖЬЛОЖЬЛОЖЬ	ЛОЖЬЛОЖЬЛОЖЬЛОЖЬ	ЛОЖЬЛОЖЬЛОЖЬЛОЖЬ	ЛОЖЬЛОЖЬЛОЖЬЛОЖЬ	ЛОЖЬЛОЖЬЛОЖЬЛОЖЬ	ЛОЖЬЛОЖЬЛОЖЬЛОЖЬ	ЛОЖЬЛОЖЬЛОЖЬЛОЖЬ	ЛОЖЬЛОЖЬЛОЖЬЛОЖЬ
Alternative name
Hidden calculations	•	•	•	•	•	•	•	•	•	•	•	•	•	•	•	•	•	•	•	•	•	•	•	•	•	•	•	•	•	•	•	•	•	•	•	•	•	•	•	•	•	•	•	•	•	•	•	•	•
[truncated: 206 more columns]
