# Supplementary material for: Unique Amphibole Bearing Mantle Column Beneath the Leningrad Kimberlite Pipe, West Ukukit Field, NE Yakutia
Source: Preprints.org preprint supplement (doi:10.20944/preprints202112.0444.v1), 2021-12-28
Supplement: Supplementary file 4 [file ExperData.xls]

## Sheet: 5he
INDEX	SiCpx	TiCpx	AlCpx	CrCpx	FeCpx	MnCpx	MgCpx	CaCpx	NaCpx	KCpx	Pexp	Fixed ToC
"Tin07 "	44.77	0.76	12.44	1.27	3.87	0	20.85	10.58	2.95	0.51	25	1000
"Tin04 "	44.05	0.68	14.69	1.22	3.7	0	19.03	11.17	2.9	0.56	15	1000
"Tin01 "	45.44	0.63	13.29	1.31	4.02	0	19.64	11.42	1.93	0.32	10	1000
"T-3644 "	44.1	0.76	14.18	0.97	4.83	0	18.72	11.04	3.05	0	25	925
"T-3644 "	44.1	0.76	14.18	0.97	4.83	0	18.72	11.04	3.05	0	25	925
"T-3643 "	43.05	0.78	15.22	0.75	5.62	0	19.8	10.16	2.39	0	15	925
"T-3643 "	43.05	0.78	15.22	0.75	5.62	0	19.8	10.16	2.39	0	15	925
"T-2818 "	43.16	0.93	15.39	1.08	4.48	0	19.4	10.43	3.13	0	18	1050
"T-2818 "	43.16	0.93	15.39	1.08	4.48	0	19.4	10.43	3.13	0	18	1050
"T-2817 "	43.86	0.87	15.07	0.89	4.01	0	19.3	10.59	3.41	0	20	1050
"T-2817 "	43.86	0.87	15.07	0.89	4.01	0	19.3	10.59	3.41	0	20	1050
"T-2738 "	45.47	0.89	13.85	1.06	4.41	0	19.15	11.23	1.94	0	5	975
"T-2738 "	45.47	0.89	13.85	1.06	4.41	0	19.15	11.23	1.94	0	5	975
"T-2721 "	43.55	0.88	15.94	0.89	4.86	0	20.3	9.32	2.26	0	7	1025
"T-2721 "	43.55	0.88	15.94	0.89	4.86	0	20.3	9.32	2.26	0	7	1025
"T-2712 "	44.25	0.84	15.39	1.07	3.97	0	18.88	10.73	2.86	0	20	1050
"T-2712 "	44.25	0.84	15.39	1.07	3.97	0	18.88	10.73	2.86	0	20	1050
"T-2700 "	44.63	0.53	13.8	1.1	4.85	0	20.51	10.46	2.12	0	10	925
"T-2700 "	44.63	0.53	13.8	1.1	4.85	0	20.51	10.46	2.12	0	10	925
"T-2663 "	45.36	0.66	12.6	1.05	4.04	0	20.94	9.71	3.64	0	27	1000
"T-2663 "	45.36	0.66	12.6	1.05	4.04	0	20.94	9.71	3.64	0	27	1000
"T-2649 "	43.16	1.03	16.6	1.3	3.9	0	18.71	10.7	2.6	0	10	1050
"T-2649 "	43.16	1.03	16.6	1.3	3.9	0	18.71	10.7	2.6	0	10	1050
"T-2643 "	44.88	0.79	14.11	0.97	4.45	0	19.47	10.99	2.34	0	10	1000
"T-2643 "	44.88	0.79	14.11	0.97	4.45	0	19.47	10.99	2.34	0	10	1000
"T-2632 "	45.29	0.74	13.07	1.06	3.97	0	19.47	10.44	3.95	0	27	1025
"T-2632 "	45.29	0.74	13.07	1.06	3.97	0	19.47	10.44	3.95	0	27	1025
"T-2626 "	45.04	0.7	13.65	1.47	3.74	0	19.72	10.16	3.52	0	25	1000
"T-2626 "	45.04	0.7	13.65	1.47	3.74	0	19.72	10.16	3.52	0	25	1000
"T-2624 "	44.2	0.91	14.74	0.89	4.16	0	18.98	10.47	3.65	0	23	1075
"T-2624 "	44.2	0.91	14.74	0.89	4.16	0	18.98	10.47	3.65	0	23	1075
"Sub52 "	48.25	1.72	17.77	0	6.02	0.21	14.28	10.28	1.91	0.06	29	800
"OCA26 "	41.5	3.3	15.1	0.1	8.8	0.04	14.8	12.07	2.2	1.93	10	1150
"O21150 "	41.5	3.3	15.1	0.1	8.8	0.04	14.8	12.07	2.2	1.93	10	1150
"mm42 "	52.32	1.86	3.11	0.37	4.08	0.08	19.98	7.05	3.94	3.83	30	1000
"mm41 "	53.67	1.41	1.92	0.12	5.53	0.06	20.31	7.98	3.31	4.49	30	1100
"Ma99s "	56.3	0	1.4	0.1	24	0	2.4	7	2.2	0	90	1100
"Ma97 "	55.44	0.76	1.85	0.01	24.17	0.05	8	3.64	4.84	2.17	40	900
"Ma96s "	56.2	0	2.1	0.1	24.2	0	2.4	6.8	2.2	0	80	1300
"Ma86s "	55.9	0	2.4	0.1	23.9	0	3.5	5.1	2.2	0	50	850
"Ma76s "	56.5	0	2.9	0.1	23.7	0	4.1	4.4	2.2	0	65	800
"Ma64s "	56.3	0	3	0.1	24	0	3.5	5.4	2.2	0	70	1100
"Ma62s "	55.8	0	2.1	0.1	24.2	0	2.8	6.1	2.2	0	80	1100
"Ma57 "	54.36	1.82	2.56	0.01	24	0.05	8.22	3.25	4.85	2.17	40	1100
"Ma54 "	54.69	1.18	3.06	0.01	23.63	0.05	7.85	3.22	5.26	2.17	60	1100
"Ma49 "	54	1.7	2.78	0.01	23.78	0.05	8.01	3.23	5	2.16	50	1100
"Ma47 "	54.62	0.89	2.93	0.01	23.88	0.05	7.82	3.14	5.38	2.17	70	1100
"Ma46 "	53.96	0.89	3.26	0.01	23.59	0.05	7.47	2.51	6.31	2.15	80	1300
"Ma45 "	55.21	0.26	2.67	0.01	23.7	0.05	7.59	2.98	5.99	2.16	80	1000
"Ma40 "	55.66	0.57	2.52	0.01	23.96	0.05	7.56	2.54	6.49	2.18	80	1200
"Ma38 "	53.53	2.65	3.12	0.01	23.46	0.05	7.82	3.37	4.96	2.17	40	1200
"Ma36 "	55.49	0.47	3.21	0.01	23.6	0.05	7.43	3.22	5.88	2.18	80	1100
"Ma106s "	55.6	0	1.9	0.1	24	0	2.3	6.9	2.2	0	80	1200
"JK28 "	55.5	1.48	1.33	0.01	24.47	0.05	8.03	4.06	4.01	2.18	20	900
"JK26 "	55.28	1.73	1.32	0.01	24.27	0.05	8.1	4.13	3.75	2.17	15	900
"JK19 "	54.38	1.36	2.06	0.01	23.93	0.05	8.11	3.77	4.32	2.15	30	1000
"JK17 "	54.14	2.31	2.66	0.01	23.81	0.05	8.13	3.42	4.89	2.18	30	1150
"JK15 "	54.41	2.23	2.49	0.01	23.75	0.05	8.29	3.29	4.69	2.18	30	1100
"JK14 "	55.69	1.67	1.24	0.01	24.31	0.05	7.81	4.48	3.82	2.18	10	900
"IG151080"	43.7	2.86	11.94	0.14	9.77	0.27	15.45	9.64	3.04	1.22	15	1080
"IG151000"	44.34	2.48	10.15	0	11.18	0.39	15.02	9.29	4.02	1.14	15	1000
"IG141110"	43.4	3.2	12.7	0.17	9.2	0	15.4	10.1	2.9	1.6	14	1110
"IG141090"	43.5	3.3	12.1	0.11	8.6	0	15.2	9.9	2.9	1.5	14	1090
"IG051040"	44.25	2.71	10.85	0	10.72	0.39	15.5	9.33	3.2	1.06	5	1040
"IG051000"	44.34	2.48	10.15	0	11.18	0.39	15.02	9.29	4.02	1.14	15	1000
"HAw11 "	45.68	1.78	11.36	1.07	4.64	0	19.27	9.95	3.09	1.17	28	1100
"HAw09 "	43.82	2.56	13.41	1.57	4.84	0	18.47	9.04	3.16	1.15	25	1100
"HAw08 "	44.56	1.41	12.74	1.32	4.38	0	19.35	9.96	3.51	0.76	25	1025
"HAw07 "	44.22	1.57	13.23	1.68	4.61	0	18.38	10.55	2.98	0.78	25	1000
"HAw06 "	44.73	1.69	12.55	1.6	4.76	0	18.37	10.83	2.8	0.68	20	1100
"HAw05 "	43.99	2.35	12.98	1.5	4.69	0	18.39	10.15	3.17	0.79	20	1025
"HAw04 "	44.07	2.51	13.43	1.42	4.85	0	18.58	9.74	2.66	0.73	20	1000
"HAw03 "	44.11	1.87	13.26	1.3	4.94	0	18.97	10.21	2.71	0.62	15	1025
"HAw02 "	44.96	1.88	12.67	1.29	5.34	0	18.07	11.08	2.13	0.58	15	1000
"G311 "	45.2	0.59	13.3	0.47	3.4	0.03	19.9	10.6	3	1.4	30	1100
"G310 "	45.5	0.64	13.6	0.53	3.7	0.03	19.8	9.9	3.42	1.25	20	1100
"G308 "	46.2	0.57	13.2	0.4	3.6	0.02	19.9	10	3.4	1.3	30	1050
"D1064 "	49.7	0.51	9.9	0	4.2	0	19.7	4.9	5.9	0.64	35	1000
"CD2H6 "	45.79	0.21	11.12	0.98	5.04	0.1	21.61	9.4	3.09	0.12	12	1200
"CD2H4 "	46.78	0.2	10.38	0.63	6.84	0.15	21.1	8.52	2.79	0.1	12	1180
"C6 "	46.17	0.82	12.2	1.13	4.04	0	19.66	10.27	3.44	0	30	925
"C6 "	46.17	0.82	12.2	1.13	4.04	0	19.66	10.27	3.44	0	30	925
"C5 "	46.43	0.83	12.57	0.99	3.76	0	19.31	10.4	3.38	0	28	925
"C5 "	46.43	0.83	12.57	0.99	3.76	0	19.31	10.4	3.38	0	28	925
"C4 "	47.72	0.48	12.52	0.9	3.91	0	19.62	11.11	1.59	0	10	925
"C4 "	47.72	0.48	12.52	0.9	3.91	0	19.62	11.11	1.59	0	10	925
"C3 "	47.18	1.23	11.2	1.11	4.66	0	0.2	10.75	1.7	0	5	925
"C3 "	47.18	1.23	11.2	1.11	4.66	0	0.2	10.75	1.7	0	5	925
"An69-3h "	45.7	0.83	11.56	0	6.61	0	17.65	11.47	2.34	0.41	50	970
"An69-3g "	46.16	1.12	12.67	0	7.05	0	17.93	11.2	2.35	0.44	50	970
"An69-3f "	46.33	1.21	11.04	0	7.64	0	17.35	11.09	2.32	0.36	50	970
"An69-3e "	47.51	1.3	11.75	0	7.38	0	18.18	11.54	2.13	0.44	50	970
"An69-3d "	47.3	1.22	11.93	0	7.71	0.33	17.89	11.42	2.28	0.42	50	970
"An69-3c "	47.17	1.47	12.74	0	7.11	0	17.76	11.75	2.45	0.63	50	970
"An69-3b "	47.62	1.29	11.77	0	6.2	0	18.49	11.73	2.23	0.37	50	970
"An69-3a "	46.04	1.72	12.91	0	6.02	0	17.34	11.67	2.47	0.37	50	970
"An69-1f "	42.63	1.23	11.41	0.2	7.55	0.24	14.64	10.81	2.08	0.44	50	990
"An69-1e "	42.17	1.09	11.68	0.06	8.54	0.27	14.34	11.25	2	0.39	50	990
"An69-1d "	40.23	1.2	11.38	0.14	9.1	0.19	13.26	10.72	1.98	0.4	50	990
"An69-1c "	42.68	1.23	12.07	0.21	8.98	0.33	14.54	11.41	2.15	0.44	50	990
"An69-1b "	42.83	0.92	12.48	0.1	8.09	0.03	14.45	11.42	2.24	0.36	50	990
"An69-1a "	44.07	0.84	11.74	0.14	9.3	0.19	14.71	11.69	2.14	0.34	50	990
"An68-6j "	42.63	1.15	11.4	0	7.96	0	16.53	10.18	2.16	0.49	30	980
"An68-6f "	43.15	1.46	11.25	0	8.29	0	16.36	11.19	2.01	0.39	30	980
"An68-6e "	44.69	1.21	11.26	0	8.04	0.38	16.16	10.81	2.42	0.45	30	980
"An68-6d "	41.36	1.12	11.4	0	8.33	0	14.95	10.34	2.2	0.45	30	980
"An68-6c "	41.95	1.57	11.25	0	8.47	0	15.67	11.23	1.88	0.36	30	980
"An68-6b "	42.68	1.25	11.66	0	8.38	0	15.98	10.37	2.03	0.32	30	980
"An68-6a "	42.98	1.69	11.43	0	8.61	0.36	16.31	11.25	1.99	0.44	30	980
"An68-2d "	42.46	0.88	12.35	0.05	9.16	0.27	15.2	11.64	2.2	0.4	30	965
"An68-2c "	41.42	0.82	12.28	0	9.18	0.23	15.14	11.58	2.11	0.31	30	965
"An68-2b "	42.19	1.02	11.63	0.12	8.85	0.31	15.36	11.51	2.23	0.32	30	965
"An68-2a "	45.21	1.19	12.03	0.16	7.94	0	16.81	11.43	2.17	0.36	30	965
"An65-1b "	46.53	1.36	11.26	0	9.18	0.29	17.65	11.37	2.09	0.27	20	950
"An65-1a "	45.1	1.38	11.11	0.35	9.61	0.33	15.21	11.38	2.22	0.34	20	950
"AJE137 "	55.34	0.74	1.24	0.05	5.12	0.07	20.46	6.73	3.5	5.04	30	950
"AG3R79 "	41.36	2.57	12.48	0.02	9.7	0.2	0.01	5.7	8.35	4.13	25	1100
"AG3R78 "	39.26	2.64	11.33	0.02	9.86	0.15	0.01	9.12	6.53	2.91	30	1170
"AG3R77 "	40.89	2.55	11.47	0.05	10.99	0.16	0.01	8.81	8.82	3.7	10	1025
"AG31950 "	42.55	2.75	12.37	0.03	9.95	0.19	0.01	6.88	9.31	3.85	25	1100
"AG21950 "	44.51	2.01	11.32	0.18	7.69	0.09	0.07	17.22	10.1	2.95	30	1170
"AG21949 "	39.88	2.86	11.93	0.04	8.98	0.17	0.01	9.1	7.84	3.43	20	1075
"AG21948 "	40.53	2.68	11.65	0.03	10.22	0.17	0.01	9.6	8.06	3.7	30	1170
"AG21056 "	40.99	3.57	10.66	0.01	5.95	0.13	0.01	6.76	6.87	4.7	35	1180
"99 "	41.88	2.56	14.32	0	16.11	0.24	10.13	10.83	2.41	0.13	8	900
"959 "	43.9	1.21	13.52	0	15.52	0.23	9.49	11.15	2.29	0.16	14	700
"95 "	40.54	2.68	14.77	0	14.65	0.15	11.06	10.05	2.89	0.14	12	950
"95 "	41.64	2.62	14.24	0	16.47	0.24	10.36	10.74	2.38	0.13	10	900
"94 "	41.02	2.42	15.12	0	16.22	0.18	10.14	10.19	2.73	0.14	12	900
"840 "	48.11	0.72	11.76	0	14.01	0.18	10.21	8.03	3.44	0.26	22	650
"765 "	43.55	1.37	13.39	0	16.2	0.26	9.51	10.79	2.42	0.17	14	700
"741 "	45.05	0.91	13.98	0	15.74	0.17	9.81	8.79	3.87	0.18	20	700
"73 "	41.43	2.17	15.16	0	15.8	0.12	10.34	9.99	2.92	0.15	14	900
"720 "	45.2	0.98	12.41	0	15.59	0.24	9.73	8.97	3.44	0.23	18	700
"720 "	43.31	1.04	13.73	0	15.44	0.2	9.4	10.68	2.97	0.16	16	700
"669 "	43.96	1.19	11.93	0	16.78	0.2	9.67	11.52	1.71	0.14	8	700
"573 "	43.47	1.26	12.84	0	16.5	0.15	9.51	11.68	1.89	0.14	10	700
"552 "	48.18	0.8	11.71	0	16.49	0.24	10.83	6.8	3.15	0.29	22	650
"549 "	45.32	1.04	13.49	0	15.35	0.18	9.9	9.07	3.36	0.21	18	700
"500 "	44.05	1.4	12.5	0	16.99	0.21	9.5	11.28	1.81	0.11	12	700
"398 "	44.56	1.22	13.18	0	15.77	0.24	9.69	9.94	2.87	0.16	16	700
"336 "	45.02	1.35	11.82	0	16.34	0.25	9.82	11.29	1.89	0.15	10	750
"330 "	41.83	2.04	12.98	0	16.72	0.26	9.65	11.22	2.32	0.14	9	800
"305 "	40.81	2.17	14.23	0	15.46	0.1	10.94	10.6	2.66	0.15	11	900
"288 "	42.05	1.91	14.02	0	16.3	0.27	9.75	10.88	2.4	0.1	10	800
"284 "	42.32	1.52	15.17	0	15.26	0.25	9.43	10.07	2.64	0.16	16	800
"264 "	42.67	1.25	13.27	0	15.28	0.27	9.17	11.04	2.33	0.14	12	700
"262 "	41.75	1.73	15.79	0	15.72	0.23	8.66	10.19	2.46	0.15	14	800
"241 "	42.23	1.73	14.68	0	16.07	0.25	9.15	10.57	2.04	0.14	12	800
"240 "	43.04	1.03	13.47	0	14.95	0.29	9.47	9.87	2.94	0.2	14	700
"217 "	42.63	1.3	15.01	0	15.45	0.22	9.41	9.44	2.99	0.16	18	800
"168 "	45.84	1.09	12.64	0	14.92	0.23	10.1	9.01	3.03	0.18	18	700
"1630 "	48.56	0.57	11.68	0	15.52	0.24	10.89	6.32	3.43	0.22	22	650
"144 "	40.5	2.75	14.57	0	15.71	0.15	10.85	10.04	2.81	0.13	11	950
"1392 "	49.1	0.59	11.45	0	14.31	0.21	10.32	7.67	3.74	0.21	22	650
"1392 "	48.25	0.6	11.29	0	15.28	0.23	10.86	6.45	3.37	0.27	22	650
"138 "	43.27	1.23	14.43	0	15.99	0.23	9.43	8.64	2.78	0.16	20	800
"1220 "	44.25	1.1	13.33	0	15.97	0.27	9.66	10.22	3.23	0.2	16	700
"119 "	40.72	3.35	14.62	0	15.21	0.18	11.18	10.14	3.1	0.11	10	950
"1172 "	44.66	1.17	12.79	0	15.53	0.24	9.77	10.12	2.86	0.18	14	700
"1118 "	43.79	1.33	15.01	0	15.46	0.24	9.31	9.82	2.96	0.23	16	700
"1101 "	44.99	1.04	12.84	0	15.33	0.21	9.97	8.99	3.56	0.24	18	700
