# Supplementary material for: Unique Amphibole Bearing Mantle Column Beneath the Leningrad Kimberlite Pipe, West Ukukit Field, NE Yakutia
Source: Preprints.org preprint supplement (doi:10.20944/preprints202112.0444.v1), 2021-12-28
Supplement: Supplementary file 5 [file SupplementaryFile1 LeningradEPMA.xls]

## Sheet: LenCpx
		Table 1-1. Microprobe analyses of clinopyroxenes from Leningrad pipe (wt.%)
		SiO2	TiO2	Al2O3	Cr2O3	FeO	MnO	MgO	CaO	Na2O			Total
LenD5-107	D	56.37	0.02	0.83	0.32	1.22	0.04	16.62	23.34	0.21	0.03		99
LenD5-107	D	56.37	0.02	0.83	0.32	1.22	0.04	16.62	23.34	0.21	0.03		99
LenD5-12	D	56.33	0.51	2.83	0.21	8.49	0.15	14.78	19.23	0.41	0.06		103
LenD5-21	D	52.6	0.58	2.75	0.55	8.4	0.15	14.59	19.55	0.51	0.39		100.07
LenD5-48	D	54.78	0.22	1.56	1.64	2.27	0.07	16.57	20.22	1.67	0.03		99.03
LenD5-32	D	53.09	0.39	4.44	1.25	1.16	0.07	15.24	21.2	2.22	0		99.06
LenD5-13	D	51.41	0.34	1.9	0.33	8.48	0.17	14.42	21.66	0.39	0		99.1
Lng78	D	54.7	0.02	2.28	3.09	2.3	0.06	14.84	19.07	2.58	0		98.94
LenD5-100	D	53.55	0.25	3.35	2.51	2.04	0.05	15.39	18.95	2.94	0		99.03
LenD5-100	D	53.55	0.25	3.35	2.51	2.04	0.05	15.39	18.95	2.94	0		99.03
Lng38	D	54.9	0.23	1.25	1.92	2.47	0.09	17.26	19.4	1.52	0.03		99.07
LenD-10	D	51.25	3.23	0.74	0.02	6.19	0.09	13.63	22.15	1.79	0		99.09
Lng07	D	54.98	0.18	2.31	1.73	1.9	0.09	15.96	19.99	2	0.02		99.16
LenD-13	D	52.27	0.19	0.83	0.01	12.38	0.36	10.98	21.46	0.68	0.01		99.17
Lng04	D	55.32	0.14	1.05	2.37	2.7	0.1	15.84	19.74	1.98	0.02		99.26
LenD4-74	D	53.42	0.03	3.64	1.44	2.13	0.08	16.91	20.69	0.96	0		99.3
LenD-7	D	51.5	0.27	1.5	0.04	13.03	0.17	10.54	21.81	0.44	0.01		99.31
LenD4-78	D	52.98	0.48	0.22	0.06	8.73	0.18	12.34	22.22	2.09	0.03		99.33
LenD5-150	D	51.2	0.45	2.27	0.31	8.26	0.14	14.29	22.05	0.39	0		99.36
LenD4-79	D	52.54	1.49	0.46	0.11	4.78	0.08	14.93	23.92	1.06	0		99.37
LenD-14	D	49.84	0.49	5.55	0.06	9.96	0.22	10.62	21.37	1.32	0		99.43
Lng05	D	55.25	0.16	2.25	1.79	1.75	0.04	15.92	20.36	1.94	0.01		99.47
LenD5-76	D	53.85	0.13	2.84	0.95	1.49	0.05	16.39	22.44	1.36	0		99.5
Lng01	D	55.71	0.15	1.33	1.94	2.09	0.08	15.69	20.94	1.57	0.02		99.52
LenD4-26	D	54.9	0.01	1.05	1.05	1.74	0.06	17.12	22.84	0.81	0		99.58
LenD-8	D	51.46	0.19	1.38	0.06	12.71	0.34	11.24	21.44	0.58	0.21		99.61
Lng03	D	55.45	0.04	1.66	3.11	2.13	0.08	15.83	18.99	2.31	0.02		99.62
LenD5-138	D	51.83	0.6	2.26	0.24	8.34	0.17	16.41	19.51	0.27	0		99.63
LenD-15	D	49.8	0.51	5.41	0.05	10.03	0.21	10.92	21.36	1.35	0		99.64
LenD4-68	D	53.89	0.29	2.72	3.15	2.24	0.06	15.6	18.29	3.39	0.01		99.64
LenD4-39	D	54.71	0	1.06	1.12	1.74	0.05	17.33	22.82	0.84	0		99.67
LenD4-75	D	53.35	0.05	3.38	1.36	1.48	0.07	15.92	23.01	1.05	0		99.67
Lng1109	D	54.53	0.05	2.37	2.82	2.47	0.09	15.19	19.48	2.69	0		99.69
LenD4-52	D	54.43	0.31	2.68	3.08	2.33	0.06	15.32	18.13	3.34	0.01		99.69
LenD4-58	D	54.2	0.3	2.71	3.09	2.34	0.07	15.46	18.14	3.39	0.01		99.71
LenD5-132	D	52.91	0.12	2.13	1.72	1.77	0.06	17.35	23.29	0.39	0		99.74
LenD4-56	D	54.34	0.16	0.87	1.47	2.96	0.08	16.31	22.13	1.41	0.01		99.74
Lng37	D	54.95	0.25	1.45	1.09	2.86	0.09	17.69	19.92	1.41	0.03		99.74
LenD4-15	D	54.99	0.02	1.08	1.06	1.73	0.06	17.1	22.85	0.84	0.01		99.74
LenD4-57	D	54.31	0.21	1.49	1.18	2.47	0.07	16.37	22.42	1.21	0.03		99.76
LenD4-32	D	54.78	0.06	1.1	1.55	2.4	0.09	16.71	21.87	1.24	0.02		99.82
LenD4-55	D	54.36	0.31	2.71	3.13	2.32	0.07	15.35	18.3	3.27	0.01		99.83
LenD4-24	D	54.91	0.02	1.1	1.08	1.73	0.06	17.3	22.82	0.83	0		99.85
Lng06	D	55.02	0.04	0.89	0.71	2.18	0.07	17.01	23.43	0.5	0.04		99.89
LenD4-40	D	54.7	0.16	1.23	1.19	2.45	0.07	16.72	22.22	1.15	0		99.89
LenD4-48	D	54.56	0.32	2.74	3.13	2.34	0.07	15.25	18.18	3.31	0.01		99.91
LenD4-64	D	54.11	0.33	0.22	0	4.42	0.11	15.59	24.43	0.7	0		99.91
LenD4-13	D	55.01	0.03	1.07	1.06	1.77	0.05	17.24	22.81	0.87	0.01		99.92
LenD4-47	D	54.59	0.31	2.69	3.14	2.39	0.08	15.37	18.12	3.22	0.01		99.92
LenD4-43	D	54.63	0.18	1.82	3.2	2.36	0.08	16.09	18.76	2.78	0.03		99.93
LenD4-53	D	54.39	0.29	2.71	3.16	2.37	0.08	15.46	18.15	3.32	0.01		99.94
LenD4-31	D	54.8	0.28	1.79	2.21	2.51	0.05	16.27	19.71	2.28	0.04		99.94
LenD4-59	D	54.18	0.27	1.46	3.44	2.13	0.07	15.9	20.46	2.03	0.01		99.95
Lng1107	D	52.84	0.47	4.94	0.04	9.06	0.1	11.78	17.95	2.77	0.01		99.96
LenD5-16	D	53.8	0.16	2.78	0.81	1.68	0.04	16.06	23.11	1.51	0.01		99.96
LenD4-50	D	54.44	0.31	2.68	3.15	2.34	0.07	15.5	18.13	3.33	0.01		99.96
LenD4-28	D	54.87	0.02	1.05	1.01	1.75	0.05	17.43	22.96	0.84	0.01		99.99
LenD4-20	D	54.96	0.42	2.08	0.83	4.07	0.1	17.66	17.8	2.03	0.04		99.99
LenD4-51	D	54.44	0.28	2.73	3.12	2.41	0.07	15.49	18.15	3.29	0.01		99.99
LenD4-30	D	54.84	0.31	2.77	3.11	2.34	0.06	15.18	18.18	3.19	0.01		99.99
LenD4-34	D	54.76	0.3	2.73	3.13	2.39	0.06	15.32	18.14	3.17	0.01		100.01
LenD5-37	D	51.61	0.58	2.7	0.33	7.27	0.14	14.51	22.52	0.36	0		100.02
LenD4-1	D	55.12	0.07	1	1.23	2.33	0.07	16.65	22.49	1.04	0.02		100.02
LenD18-35	D	55.36	0.03	1.11	1.08	1.79	0.06	16.99	22.81	0.79	0		100.02
LenD4-44	D	54.62	0.15	0.83	1.05	2.53	0.06	16.88	22.97	0.92	0.02		100.03
LenD4-41	D	54.69	0.16	0.92	1.06	3.35	0.08	16.12	22.38	1.27	0.01		100.04
LenD4-27	D	54.89	0.27	2.75	3.08	2.35	0.06	15.16	18.21	3.26	0.01		100.04
LenD4-14	D	55	0.08	1.08	1.56	2.39	0.08	16.65	21.99	1.21	0.02		100.06
LenD18-45	D	55.25	0	1.06	1.07	1.8	0.06	17.07	22.86	0.89	0		100.06
LenD5-152	D	51.75	0.38	2.35	0.13	9.1	0.15	14.08	21.76	0.36	0.01		100.07
LenD4-18	D	54.97	0.16	0.8	0.98	3.3	0.07	16.16	22.39	1.24	0.01		100.08
LenD4-61	D	54.18	0.29	2.69	3.2	2.34	0.07	15.71	18.17	3.41	0.02		100.08
LenD4-36	D	54.73	0.17	0.98	1.04	3.34	0.06	16.07	22.39	1.3	0.01		100.09
LenD5-111	D	50.98	0.38	2.57	0.06	11.43	0.26	12.38	21.67	0.33	0.03		100.09
LenD5-111	D	50.98	0.38	2.57	0.06	11.43	0.26	12.38	21.67	0.33	0.03		100.09
LenD4-69	D	53.87	0.42	0.28	0	6.5	0.11	13.84	24.09	0.97	0.01		100.09
LenD4-6	D	55.09	0	1.05	1.02	1.77	0.07	17.38	22.91	0.81	0		100.1
LenD4-42	D	54.68	0.14	0.83	1.36	2.91	0.09	16.41	22.25	1.42	0.01		100.1
LenD18-57	D	55.17	0.42	1.88	1.16	3.4	0.09	18.1	17.83	2.03	0.03		100.11
LenD4-17	D	54.97	0.03	1.72	1.55	2.07	0.07	16.56	21.5	1.64	0		100.11
LenD4-66	D	54.03	0.17	0.15	0.04	7.23	0.08	13.64	23.77	1	0		100.11
LenD4-86	D	52.03	0.62	4.07	0.16	7.68	0.16	12.72	20.87	1.8	0		100.11
LenD4-10	D	55.02	0.28	2.04	2.23	2.52	0.05	15.7	19.86	2.41	0.02		100.13
LenD4-25	D	54.9	0.31	2.76	3.13	2.36	0.06	15.17	18.19	3.23	0.02		100.13
LenD18-32	D	55.4	0.44	2.07	1.07	3.27	0.1	17.69	17.94	2.11	0.04		100.13
LenD18-51	D	55.21	0.09	1.14	1.38	2.09	0.08	16.86	22.01	1.26	0.01		100.13
LenD18-50	D	55.22	0.08	1.1	1.61	2.44	0.07	16.45	21.91	1.24	0.02		100.14
LenD18-56	D	55.17	0.21	0.82	1.48	2.48	0.05	16.11	22.47	1.35	0		100.14
LenD4-37	D	54.72	0.17	2.71	0.16	5.2	0.11	14.6	20.13	2.34	0		100.14
LenD-5	D	51.59	0.11	1.26	0.04	13.75	0.15	8.85	24.01	0.38	0		100.14
LenD4-67	D	53.99	0.05	3.13	1.31	1.4	0.06	16.97	22.37	0.87	0		100.15
LenD5-27	D	55.21	0.24	1.54	1.48	2.3	0.07	17.18	20.37	1.74	0.03		100.16
LenD18-55	D	55.17	0.09	1.09	1.45	2.45	0.08	16.63	22.01	1.17	0.02		100.16
LenD4-9	D	55.03	0.18	0.77	1.39	2.92	0.07	16.2	22.31	1.29	0.01		100.17
LenD4-19	D	54.97	0.36	2.67	2.47	2.52	0.07	15.5	18.67	2.93	0.01		100.17
LenD4-29	D	54.86	0.29	2.72	3.14	2.34	0.06	15.26	18.19	3.31	0.01		100.18
LenD18-28	D	55.46	0.01	1.09	1.02	1.76	0.07	17.12	22.83	0.83	0		100.19
LenD18-31	D	55.44	0	1.09	0.98	1.74	0.06	17.09	22.95	0.84	0		100.19
LenD5-113	D	54.46	0	1.43	0.93	1.1	0.03	17.19	24.2	0.86	0		100.2
LenD4-33	D	54.76	0.3	2.76	3.14	2.28	0.06	15.25	18.37	3.27	0.01		100.2
LenD18-59	D	55.14	0.08	1.08	1.57	2.47	0.09	16.48	22.01	1.27	0.02		100.21
LenD-6	D	51.51	0.32	1.49	0.03	14.74	0.22	9.41	22.07	0.41	0.01		100.21
LenD4-73	D	53.55	0.03	3.52	1.53	1.77	0.07	16.24	22.64	0.86	0.01		100.22
LenD5-42	D	53.78	0.41	4.79	1.33	1.18	0.05	15.06	21.29	2.34	0		100.23
LenD4-35	D	54.75	0.35	0.68	1.41	2.74	0.09	17.27	21.98	0.96	0		100.23
LenD4-45	D	54.62	0.22	1.68	1.37	2.43	0.07	16.31	22.21	1.32	0.01		100.24
LenD-2	D	51.88	0.15	1.62	0.09	12.98	0.34	11.04	21.78	0.35	0.02		100.25
LenD4-12	D	55.01	0.18	1.02	1.28	2.42	0.08	16.54	22.51	1.2	0.01		100.25
LenD5-117	D	51.05	0.32	2.44	0.1	11.15	0.22	12.79	21.86	0.31	0.03		100.27
LenD18-33	D	55.39	0	1.08	1.03	1.74	0.05	17.23	22.89	0.86	0.01		100.28
LenD18-60	D	55.13	0.07	1.1	1.52	2.44	0.08	16.64	21.99	1.29	0.02		100.28
LenD4-2	D	55.12	0.29	2.74	3.14	2.21	0.06	15.05	18.5	3.16	0.01		100.28
LenD4-11	D	55.01	0.3	2.73	3.13	2.34	0.07	15.26	18.18	3.25	0.02		100.29
LenD4-21	D	54.94	0.07	1.1	1.58	2.45	0.09	16.86	21.88	1.3	0.02		100.29
LenD18-53	D	55.19	0.08	1.51	0.85	3.44	0.09	19.62	18.23	1.23	0.05		100.29
LenD18-48	D	55.23	0.1	1.12	1.44	2.05	0.07	16.84	22.19	1.24	0.02		100.3
LenD4-46	D	54.6	0.16	1.3	1.06	3.71	0.08	15.83	22.27	1.27	0.02		100.3
LenD4-8	D	55.06	0.31	2.76	3.19	2.31	0.07	15.13	18.3	3.17	0.01		100.31
LenD18-52	D	55.21	0.29	2.74	3.15	2.34	0.07	15.1	18.2	3.2	0.01		100.31
LenD18-29	D	55.45	0.02	1.08	1.03	1.74	0.07	17.14	22.98	0.8	0.01		100.32
LenD5-15	D	51.41	0.57	2.91	0.52	8.37	0.16	13.93	21.92	0.4	0.14		100.33
LenD18-27	D	55.49	0.28	2.78	1.64	2.17	0.07	16.1	18.99	2.79	0.03		100.34
Lng02	D	55.7	0.09	0.66	0.9	2.2	0.06	16.63	23.15	0.95	0		100.34
LenD18-23	D	55.62	0.01	1.1	1.04	1.75	0.06	17.07	22.89	0.81	0		100.35
LenD18-30	D	55.44	0.34	2.11	0.74	3.41	0.09	18.24	18.06	1.88	0.04		100.35
LenD4-63	D	54.12	0.05	3.39	1.35	1.6	0.07	15.9	22.91	0.97	0		100.36
LenD5-116	D	55.06	0.22	1.52	1.52	2.32	0.07	17.42	20.45	1.75	0.03		100.36
LenD4-72	D	53.56	0.04	3.72	1.56	1.81	0.07	16.38	22.32	0.9	0		100.36
LenD4-16	D	54.97	0.07	1.07	1.47	2.43	0.08	16.96	22.01	1.29	0.02		100.37
LenD18-47	D	55.23	0.11	0.28	0.89	1.16	0.04	17.33	24.79	0.55	0		100.38
LenD4-76	D	53.32	0.04	3.64	1.7	2.19	0.07	17.62	20.99	0.81	0		100.38
LenD18-34	D	55.38	0.07	1.09	1.55	2.45	0.1	16.47	21.98	1.27	0.02		100.38
LenD4-22	D	54.94	0.31	2.73	3.12	2.36	0.06	15.32	18.2	3.33	0.01		100.38
LenD4-5	D	55.1	0.18	0.83	1.53	2.49	0.07	16.4	22.44	1.35	0		100.39
LenD4-23	D	54.94	0.29	2.84	3.14	2.29	0.06	15.24	18.31	3.26	0.02		100.39
LenD5-112	D	54.47	0	1.45	0.97	1.1	0.03	17.3	24.17	0.9	0		100.39
LenD4-70	D	53.86	0.04	3.39	1.36	1.39	0.07	16.53	22.76	1	0		100.4
LenD18-49	D	55.23	0.08	1.63	1.52	2.54	0.08	16.4	21.53	1.39	0.01		100.41
LenD-1	D	51.92	0.22	1.41	0.06	13.91	0.23	9.82	22.44	0.4	0		100.41
LenD18-37	D	55.32	0.32	2.74	2.47	2.54	0.06	15.28	18.69	2.98	0.01		100.41
LenD4-84	D	52.19	0.1	1.05	0	13.51	0.94	9.38	22.57	0.68	0		100.42
LenD5-38	D	51.23	0.59	2.7	0.22	8.43	0.17	14.38	22.35	0.37	0		100.44
LenD18-54	D	55.18	0.08	1.1	1.51	2.51	0.1	16.74	21.94	1.26	0.02		100.44
LenD-9	D	51.34	0.39	1.42	0.04	17.14	0.22	9.33	20.15	0.41	0		100.44
LenD4-65	D	54.05	0.02	3.42	1.47	1.73	0.07	16.27	22.38	1.04	0		100.45
LenD18-58	D	55.15	0.16	0.99	1.3	2.36	0.07	16.53	22.65	1.25	0.01		100.47
LenD18-20	D	55.72	0	1.1	1.12	1.72	0.08	16.92	22.98	0.85	0		100.49
LenD4-85	D	52.09	0.08	1.16	0.04	14.64	0.15	8.05	23.96	0.33	0		100.5
LenD-11	D	50.74	0.18	1.42	0.02	17.85	0.28	6.47	23.19	0.35	0		100.5
LenD18-44	D	55.28	0.29	2.76	3.1	2.3	0.06	15.23	18.16	3.32	0.01		100.51
LenD18-26	D	55.56	0.44	2.1	1.09	3.29	0.1	18.08	17.76	2.06	0.03		100.51
LenD5-33	D	54.7	0.12	2.21	1.33	1.58	0.05	16.63	22.31	1.59	0		100.52
LenD18-25	D	55.59	0.37	1.91	1.28	3.35	0.08	17.77	18.08	2.06	0.03		100.52
LenD4-60	D	54.18	0.32	0.17	0.17	5.05	0.1	15.22	24.54	0.77	0		100.52
LenD4-71	D	53.62	0.02	3.58	1.51	1.72	0.06	16.44	22.65	0.92	0		100.52
LenD4-38	D	54.71	0.01	1.91	0.88	1.29	0.05	16.79	24.01	0.88	0		100.53
LenD4-4	D	55.11	0.3	2.79	3.15	2.27	0.06	15.28	18.33	3.24	0.01		100.54
LenD18-24	D	55.6	0.43	1.91	1.68	3.33	0.11	17.72	17.61	2.11	0.04		100.54
LenD4-77	D	53.02	0.52	0.32	0.02	9.92	0.15	12.22	22.39	1.99	0		100.55
Lng1108	D	51.68	0.37	4.03	0.04	10.25	0.36	11.69	21.32	0.82	0		100.56
LenD18-40	D	55.3	0.15	0.91	0.81	3.62	0.08	16.07	22.35	1.27	0.01		100.57
LenD-4	D	51.74	0.08	1.06	0.02	14.51	0.17	8.51	24.12	0.36	0		100.57
LenD4-81	D	52.51	0.09	1.07	0.02	12.41	0.08	9.84	24.17	0.39	0		100.58
LenD18-21	D	55.69	0.01	1.07	1.02	1.79	0.06	17.18	22.96	0.81	0		100.59
LenD4-80	D	52.53	0.04	0.94	0.03	12.55	0.15	9.78	24.27	0.29	0.01		100.59
LenD18-46	D	55.25	0.25	1.6	2.6	2.47	0.07	15.92	20.02	2.41	0.02		100.61
LenD18-36	D	55.35	0.05	1.09	1.53	2.45	0.07	16.76	22.01	1.28	0.02		100.61
LenD18-41	D	55.29	0.16	0.95	1.45	2.95	0.08	16.03	22.31	1.4	0.01		100.63
LenD4-62	D	54.16	0.04	3.4	1.31	1.89	0.07	16.77	22.17	0.85	0		100.66
LenD4-49	D	54.47	0.31	0.13	0.15	5.86	0.09	14.51	24.01	1.1	0.03		100.66
LenD18-42	D	55.29	0.31	2.77	3.08	2.35	0.08	15.36	18.23	3.18	0.01		100.66
LenD18-39	D	55.31	0.14	0.8	1.38	2.94	0.08	16.24	22.49	1.37	0.01		100.76
LenD18-43	D	55.28	0.3	2.76	3.16	2.32	0.07	15.37	18.19	3.3	0.01		100.76
LenD4-83	D	52.28	0.07	1.13	0.04	13.21	0.13	9.32	24.19	0.41	0.01		100.79
LenD4-82	D	52.49	0	4.45	1.6	1.52	0.07	16.52	23.34	0.81	0		100.8
LenD18-38	D	55.32	0.08	1.11	1.52	2.48	0.09	16.88	22	1.31	0.02		100.81
LenD18-19	D	56.08	0.25	2.85	1.63	2.15	0.07	15.89	19.11	2.77	0.02		100.82
LenD18-22	D	55.67	0.07	1.12	1.55	2.46	0.09	16.53	21.97	1.33	0.03		100.82
LenD5-22	D	51.9	0.42	2.21	0.42	7.63	0.14	15.08	22.71	0.43	0.01		100.95
LenD4-3	D	54.12	0.05	2.89	1.6	1.83	0.05	17.61	20.56	1.29	0		100
LenD4-54	D	53.39	0.12	3.54	2.08	1.76	0.06	16.39	20.99	1.72	0		100.05
LenD-3	D	50.86	0.45	1.13	0.03	14.44	0.22	9.96	21.79	1.35	0.02		100.25
LenD4-7	D	54.06	0.03	2.97	1.11	3.9	0.09	22.64	15.25	0.55	0		100.6
Lng21	A	42.21	1.04	13.41	0.51	8.53	0.09	15.33	11.25	2.41	1.71
Lng21	A	42.21	1.04	13.41	0.51	8.53	0.09	15.33	11.25	2.41	1.71
Lng89	A	43.44	1.4	13.79	0.48	6.71	0.08	15.92	10.98	2.56	1.68
Lng89	A	43.44	1.4	13.79	0.48	6.71	0.08	15.92	10.98	2.56	1.68
LenD5-101	A	50.09	0.18	7.46	0.16	6.54	0.09	19.3	9.82	3.34	0.22
LenD5-102	A	48.25	0.22	7.89	0.14	6.71	0.07	20.29	9.08	3.1	0.21
LenD5-103	A	50.05	0.2	7.8	0.13	6.45	0.09	19.17	9.83	3.32	0.24
LenD5-104	A	56.78	0.34	3.02	0.96	2.86	0.05	22.83	9.89	4.64	0.45
LenD5-105	A	54.09	0.18	2.34	0.99	2.69	0.04	22.02	8.04	5.79	0.47
LenD5-106	A	56.2	0.19	1.07	0.5	2	0.04	23.37	8.68	4.89	0.53
LenD5-108	A	49.52	0.2	7.94	0.11	6.5	0.1	19.13	9.64	3.41	0.22
LenD5-109	A	49.61	0.22	7.83	0.14	6.4	0.09	19.18	10.04	3.34	0.24
LenD5-11	A	49.52	0.53	2.32	0	26.55	0.41	8.12	9.61	0.82	0.3
LenD5-110	A	56.59	0.18	0.43	0.36	2.35	0.05	23.66	6.18	7.06	1.45
LenD5-114	A	53.39	0.26	2.5	0.97	2.65	0.05	20.78	8.75	4.51	0.57
LenD5-115	A	54.24	0.18	2.24	0.93	2.68	0.04	22.8	8.18	5.89	0.42
LenD5-122	A	38.32	0.07	8.91	0.13	17.19	0.28	20.35	0.61	0.26	5.9
LenD5-124	A	41.5	0.05	12.83	0.94	2.49	0	26.22	0	2.36	7.24
LenD5-125	A	56.49	0.23	0.51	0.02	2.85	0.03	23.32	6.79	5.78	2.72
LenD5-127	A	55.3	0.26	1.62	0.55	2.25	0.03	23.22	8.51	5.36	0.65
LenD5-128	A	53.8	0.04	26.77	0.06	1.38	0.05	1.2	3.81	1.54	8.93
LenD5-129	A	54.98	0	0.62	0.31	1.24	0.05	18.18	24.94	0.17	0
LenD5-130	A	49.79	0.17	7.62	0.2	6.48	0.1	19.37	9.78	3.26	0.21
LenD5-133	A	55.93	0.25	0.58	0.06	2.59	0.04	23.04	6.94	6.18	2.27
LenD5-134	A	56.09	0.26	0.59	0.07	2.62	0.03	22.73	6.95	6.15	2.28
LenD5-139	A	55.23	0.33	0.79	0.15	2.29	0.02	23.12	6.95	6.37	1.98
LenD5-14	A	41.55	2.26	10.87	0.14	17.22	0.17	10.39	11.47	2.19	1.22
LenD5-144	A	49.56	0.18	7.73	0.11	6.47	0.1	19.12	9.77	3.29	0.23
LenD5-149	A	46.75	0.01	11.99	1.41	2.42	0.04	18.58	12.52	2.4	0.81
LenD5-151	A	53.12	0.17	3.44	0.96	2.65	0.06	23.16	9.6	4.56	0.2
LenD5-153	A	56.46	0.19	0.46	0.16	2.78	0.04	23.22	6.75	6.1	2.49
LenD5-18	A	44.06	0.46	12.06	1.27	3.89	0.05	18.96	12.13	3.04	0.98
LenD5-20	A	45.81	0.05	11.67	1.48	2.44	0.04	19.79	12.53	2.9	0.22
LenD5-23	A	55.84	0.25	0.56	0.27	2.56	0.03	22.88	6.86	6.21	2.25
LenD5-24	A	50.48	0.2	7.69	0.14	6.49	0.1	19.34	9.83	3.33	0.22
LenD5-25	A	55.34	0.43	1.64	0.81	2.43	0.05	22.79	8.44	4.88	1.01
LenD5-26	A	55.55	0.4	1.59	0.8	2.37	0.05	22.15	8.37	4.66	1
LenD5-26	A	53.9	0.35	1.54	0.69	2.03	0.03	22.67	7.85	4.85	0.92
LenD5-28	A	55.98	0.14	2.3	0.89	2.44	0.06	23.41	9.42	4.6	0.58
LenD5-29	A	54.71	0.22	1.31	0.68	2.21	0.04	22.58	7.99	5.37	0.9
LenD5-30	A	56.07	0.2	0.87	0.04	3.18	0.03	22.71	7.2	6.23	1.79
LenD5-31	A	54.46	0.39	2.36	0.83	2.61	0.05	22.57	8.91	4.95	0.76
LenD5-34	A	53.96	0.23	2.45	0.82	2.73	0.05	22.57	8.69	5.08	0.59
LenD5-35	A	55.45	0.09	1.85	1.14	2.51	0.04	22.77	6.67	7.43	0.5
LenD5-36	A	31.29	3.24	10.95	0.02	32.73	0.34	5.81	2.23	0.45	5.85
LenD5-39	A	55.95	0.15	1.06	0.54	2.16	0.04	23.15	7.98	5.49	0.78
LenD5-4	A	51.07	0.56	4.67	0.23	9.75	0.11	17.68	12.14	1.02	0.04
LenD5-40	A	52.6	0.24	2.31	0.65	9.02	0.1	18.91	11.61	0.37	0.1
LenD5-43	A	44.12	0.28	13.28	1.49	2.57	0.05	19.04	11.99	3.69	0.17
LenD5-44	A	51.64	0.04	4.55	1.55	2.83	0.05	22.04	9.37	4.83	0.32
LenD5-45	A	54.46	0.17	1.58	0.77	2.25	0.05	22.03	7.97	5.03	1.17
LenD5-46	A	53.72	0.42	2.54	0.94	2.73	0.04	22.17	8.8	4.7	0.84
LenD5-47	A	51.05	0.18	5.51	1.53	2.88	0.06	21.63	10.14	4.41	0.21
LenD5-49	A	54.61	0.17	1.99	0.97	2.29	0.04	22.71	8.55	4.99	0.83
LenD5-50	A	47.03	0.4	11.19	0.69	2.87	0.03	20.75	12.81	3.01	0.68
LenD5-51	A	55.63	0.15	1.07	0.54	2.19	0.05	22.78	8.18	5.13	0.85
LenD5-52	A	56.09	0.24	0.63	0.12	2.45	0.03	23.15	7.01	5.99	2.35
LenD5-53	A	55.64	0.25	1.1	0.14	3.68	0.04	22.54	7.25	5.93	1.6
LenD5-54	A	45.64	0.05	11.25	1.48	2.31	0.05	19.41	12.2	2.86	0.38
LenD5-55	A	54.81	0.11	2.26	0.87	2.47	0.05	22.67	9.11	4.47	0.52
LenD5-56	A	42.38	0.3	11.72	1.8	4.22	0.03	18.4	11.83	3.15	0.75
LenD5-57	A	44.05	0.3	13.3	1.49	2.52	0.04	19.1	11.9	3.71	0.17
LenD5-58	A	53.1	0.23	3.56	1.07	2.61	0.05	22.47	9.73	4.34	0.45
LenD5-59	A	54.59	0.22	1.47	0.78	2.2	0.05	22.51	8.01	5.1	1.16
LenD5-60	A	48.93	0.02	7.02	1.74	2.98	0.05	21.13	10.84	3.79	0.28
LenD5-61	A	55.35	0.35	2.43	0.96	2.4	0.05	23.43	9.69	4.51	0.51
LenD5-62	A	55.49	0.22	1.34	0.62	2.24	0.03	22.77	7.82	5.67	1.02
LenD5-63	A	43.79	0.29	13.21	1.58	2.59	0.03	19.23	11.89	3.69	0.16
LenD5-64	A	56.25	0.17	0.32	0.11	1.95	0.02	23.3	6.42	6.36	2.53
LenD5-65	A	56.61	0.25	0.28	0.12	1.65	0.01	23.82	6.52	6.05	2.91
LenD5-66	A	55.51	0.17	1.91	0.74	2.43	0.05	24.03	8.83	5.16	0.71
LenD5-67	A	52.71	0.09	3.45	0.99	2.42	0.05	22.38	10.06	3.94	0.27
LenD5-68	A	54.78	0.16	1.82	1.13	2.37	0.04	22.82	7.15	6.64	0.72
LenD5-69	A	52.17	0.23	3.69	1.01	3.4	0.08	22.16	8.63	5.19	0.36
LenD5-70	A	56.06	0.25	0.57	0.13	2.43	0.03	23.1	6.97	5.99	2.39
LenD5-71	A	55.78	0.18	1.35	0.69	2.27	0.05	23	8.29	5.11	0.91
LenD5-72	A	46.13	0.03	10.58	1.65	2.27	0.03	19.46	12.31	2.57	0.5
LenD5-73	A	46.48	0.36	10.45	0.8	2.87	0.04	19.77	12.01	3.13	0.64
LenD5-74	A	54.01	0.31	2.62	1.02	2.23	0.04	22.56	9.52	4.34	0.47
LenD5-75	A	56.01	0.21	1.08	0.1	3.54	0.04	23.94	7.72	6.12	1.4
LenD5-77	A	55.49	0.26	0.87	0.08	3.16	0.04	22.81	6.93	6.43	2
LenD5-77	A	45.46	0.01	11.81	1.33	2.38	0.03	19.19	12.41	2.48	0.8
LenD5-78	A	55.51	0.44	2.04	0.82	2.71	0.04	23	8.77	5.03	0.84
LenD5-79	A	56.14	0.24	0.56	0.13	2.76	0.04	22.81	6.88	6.1	2.2
LenD5-80	A	56.96	0.16	0.24	0.39	2.02	0.02	23.4	5.78	7.12	1.92
LenD5-81	A	43.15	0.32	12.01	1.39	4.27	0.03	18.51	11.75	3.24	0.76
LenD5-82	A	56.56	0.16	0.23	0.24	2.04	0.01	23.51	5.84	7.19	1.9
LenD5-83	A	54.73	0.37	1.92	0.73	2.61	0.04	22.66	8.66	4.93	0.78
LenD5-84	A	45.74	0	11.39	1.34	2.32	0.02	19.61	12.59	2.43	0.76
LenD5-85	A	45.65	0.12	10.36	1.77	2.26	0.04	19.7	12.27	2.78	0.4
LenD5-86	A	47.57	0.14	3.17	1.16	2.64	0.05	19.44	8.6	3.86	0.26
LenD5-87	A	44.79	0.04	11.13	1.72	3.07	0.04	19.33	12.14	2.91	0.71
LenD5-88	A	49.74	0.19	7.67	0.11	6.57	0.09	19.48	9.82	3.35	0.22
LenD5-89	A	55.6	0.23	1.35	0.6	2.23	0.05	22.96	7.83	5.59	0.97
LenD5-90	A	54.32	0.15	2.51	0.96	2.51	0.06	22.67	8.67	5.49	0.39
LenD5-91	A	56.16	0.3	1.73	0.3	3.2	0.03	23.49	8.72	5.35	1.65
LenD5-92	A	52.86	0.05	3.15	1.13	2.6	0.05	22.35	9.23	4.57	0.4
LenD5-93	A	55.64	0.17	1.9	0.75	2.48	0.04	22.89	8.45	5.15	0.88
LenD5-94	A	55.23	0.17	1.9	0.78	2.42	0.05	22.79	8.44	5.13	0.75
LenD5-95	A	56.38	0.17	0.57	0.1	2.49	0.03	23.45	7.01	6.17	2.2
LenD5-96	A	55.11	0.14	1.89	0.84	2.23	0.05	23.11	8.63	5.22	0.66
LenD5-97	A	57.79	0.25	1.92	0.8	2.59	0.05	24.01	8.73	5.69	0.56
LenD5-98	A	52.54	0.12	3.56	1.04	2.57	0.06	22.63	9.75	4.28	0.21
LenD5-99	A	46.36	0.36	10.48	0.59	2.96	0.03	20.29	12.14	3.17	0.64
op4-14	A	36.22	0.04	19.17	0.14	28.48	11.53	1.15	0.66	0.57	0
LenD-17	A	43.87	2.14	8.29	0	17.92	0.24	10.02	11.21	2.13	1.64
LenD18-11	A	57.11	0.13	0.09	0	2.8	0.32	21.65	3.71	6.09	5.19
LenD18-12	A	57.05	0.49	0.06	0.01	5.78	0.36	19.92	1.7	7.68	5.09
LenD18-13	A	56.97	0.14	0.11	0	1.52	0.41	23.04	2.89	6.47	5.27
LenD18-8	A	57.61	0.2	0.28	0	2.7	0.4	22.27	2.37	6.73	5.44
Lng02	D	54.9	0.23	1.25	1.92	2.47	0.09	17.26	19.4	1.52	0.03
Lng04	D	55.25	0.16	2.25	1.79	1.75	0.04	15.92	20.36	1.94	0.01
Lng05	D	54.7	0.02	2.28	3.09	2.3	0.06	14.84	19.07	2.58	0
Lng06	D	54.95	0.25	1.45	1.09	2.86	0.09	17.69	19.92	1.41	0.03
Lng07	D	51.68	0.37	4.03	0.04	10.25	0.36	11.69	21.32	0.82	0
Lng1107	D	55.45	0.04	1.66	3.11	2.13	0.08	15.83	18.99	2.31	0.02
Lng1108	D	55.71	0.15	1.33	1.94	2.09	0.08	15.69	20.94	1.57	0.02
Lng1109	D	55.32	0.14	1.05	2.37	2.7	0.1	15.84	19.74	1.98	0.02
Lng37	D	54.98	0.18	2.31	1.73	1.9	0.09	15.96	19.99	2	0.02
Lng38	D	54.53	0.05	2.37	2.82	2.47	0.09	15.19	19.48	2.69	0
Lng78	D	52.84	0.47	4.94	0.04	9.06	0.1	11.78	17.95	2.77	0.01
Lng04	G	41.43	1.06	18.87	2.93	10.04	0.35	19.44	4.91	0.1	0.01
Lng04	G	41.43	1.06	18.87	2.93	10.04	0.35	19.44	4.91	0.1	0.01
Lng06	G	40.09	0.58	14.48	10.41	7.42	0.41	20.67	4.97	0.08	0
Lng06	G	40.09	0.58	14.48	10.41	7.42	0.41	20.67	4.97	0.08	0
Lng07	G	39.79	0.34	16.01	7.05	10.24	0.66	16.48	10.35	0.05	0
Lng07	G	39.79	0.34	16.01	7.05	10.24	0.66	16.48	10.35	0.05	0
Lng08	G	40.33	0.42	13.44	12.05	7.2	0.42	19.36	5.92	0.06	0
Lng08	G	40.33	0.42	13.44	12.05	7.2	0.42	19.36	5.92	0.06	0
Lng09	G	40.38	0.62	14.46	10.51	7.46	0.45	20.2	5.21	0.08	0
Lng09	G	40.38	0.62	14.46	10.51	7.46	0.45	20.2	5.21	0.08	0
Lng10	G	41.48	1.11	16.39	6.26	8.2	0.31	20.57	5.41	0.1	0.01
Lng10	G	41.48	1.11	16.39	6.26	8.2	0.31	20.57	5.41	0.1	0.01
Lng11	G	40.56	1.22	14.1	9.72	7.13	0.34	18.02	7.93	0.11	0
Lng11	G	40.56	1.22	14.1	9.72	7.13	0.34	18.02	7.93	0.11	0
Lng1101	G	41.62	0.11	20.22	3.81	9.25	0.54	19.45	4.39	0.07	0.03
Lng1101	G	41.62	0.11	20.22	3.81	9.25	0.54	19.45	4.39	0.07	0.03
Lng1103	G	41.26	0.94	17.44	5.63	7.62	0.37	19.9	6	0.09	0
Lng1103	G	41.26	0.94	17.44	5.63	7.62	0.37	19.9	6	0.09	0
Lng1104	G	41.05	0.32	18.27	6.25	8.1	0.5	19.78	5.05	0.09	0.01
Lng1104	G	41.05	0.32	18.27	6.25	8.1	0.5	19.78	5.05	0.09	0.01
Lng1105	G	39.76	1.18	13.22	10.28	8.08	0.39	20.86	7.02	0.09	0
Lng1105	G	40.45	0.06	17.62	6.8	8.63	0.52	19.36	5.9	0.03	0.01
Lng1105	G	39.76	1.18	13.22	10.28	8.08	0.39	20.86	7.02	0.09	0
Lng1105	G	40.45	0.06	17.62	6.8	8.63	0.52	19.36	5.9	0.03	0.01
Lng1106	G	41.31	1.11	15.82	7.21	7.15	0.29	20.68	5.42	0.09	0
Lng1106	G	41.31	1.11	15.82	7.21	7.15	0.29	20.68	5.42	0.09	0
Lng1110	G	38.69	0.06	21.35	0	26.38	0.6	8.76	4.69	0.03	0
Lng1110	G	38.69	0.06	21.35	0	26.38	0.6	8.76	4.69	0.03	0
Lng1111	G	41.41	0.03	19.81	5.29	7.72	0.43	21.61	2.67	0.03	0
Lng1111	G	41.41	0.03	19.81	5.29	7.72	0.43	21.61	2.67	0.03	0
Lng1112	G	41.55	0.18	19.14	5.16	7.96	0.48	19.48	5.19	0.04	0
Lng1112	G	41.55	0.18	19.14	5.16	7.96	0.48	19.48	5.19	0.04	0
Lng1113	G	42.16	0.2	19.55	5.28	8.11	0.45	19.2	5.24	0.04	0
Lng1113	G	42.16	0.2	19.55	5.28	8.11	0.45	19.2	5.24	0.04	0
Lng1114	G	42.65	0.82	19.76	2.63	8.56	0.29	20.68	4.5	0.07	0
Lng1114	G	42.65	0.82	19.76	2.63	8.56	0.29	20.68	4.5	0.07	0
Lng1115	G	41.29	1.01	21.23	1.22	11.08	0.39	19.37	4.51	0.07	0
Lng1115	G	41.29	1.01	21.23	1.22	11.08	0.39	19.37	4.51	0.07	0
Lng1116	G	39.87	0.04	22.5	0.02	20.25	0.14	15.75	1.3	0.02	0
Lng1116	G	39.87	0.04	22.5	0.02	20.25	0.14	15.75	1.3	0.02	0
Lng1117	G	42.95	0.92	20.74	0.95	9.59	0.24	20.39	4.16	0.1	0.01
Lng1117	G	42.95	0.92	20.74	0.95	9.59	0.24	20.39	4.16	0.1	0.01
Lng1118	G	41.57	0.22	19.09	5.44	8.53	0.48	19.25	5.2	0.07	0.01
Lng1118	G	42.3	0.16	19.97	4.62	8.4	0.48	19.39	5.18	0.04	0
Lng1118	G	41.57	0.22	19.09	5.44	8.53	0.48	19.25	5.2	0.07	0.01
Lng1118	G	42.3	0.16	19.97	4.62	8.4	0.48	19.39	5.18	0.04	0
Lng1119	G	41.33	1	16.08	7.09	8.27	0.34	19.43	5.62	0.08	0.01
Lng1119	G	41.33	1	16.08	7.09	8.27	0.34	19.43	5.62	0.08	0.01
Lng1120	G	41.68	0.18	19.51	5.12	8.23	0.48	19.38	5.2	0.03	0.01
Lng1120	G	41.68	0.18	19.51	5.12	8.23	0.48	19.38	5.2	0.03	0.01
Lng1121	G	41.83	0.19	19.39	5.2	8.32	0.47	19.25	5.17	0.04	0
Lng1121	G	41.83	0.19	19.39	5.2	8.32	0.47	19.25	5.17	0.04	0
Lng1122	G	42.65	0.84	19.69	2.59	8.51	0.27	20.64	4.49	0.07	0
Lng1122	G	42.65	0.84	19.69	2.59	8.51	0.27	20.64	4.49	0.07	0
Lng1123	G	42.52	0.86	18.93	3.25	8.45	0.25	20.89	4.54	0.07	0
Lng1123	G	41.93	0.95	20.73	1.29	11.03	0.38	19.47	4.42	0.09	0
Lng1123	G	42.52	0.86	18.93	3.25	8.45	0.25	20.89	4.54	0.07	0
Lng1123	G	41.93	0.95	20.73	1.29	11.03	0.38	19.47	4.42	0.09	0
Lng1124	G	42.92	0	20.72	4.05	7.92	0.43	19.37	5.27	0.02	0
Lng1124	G	42.92	0	20.72	4.05	7.92	0.43	19.37	5.27	0.02	0
Lng1125	G	42.57	0.84	19.87	2.17	8.59	0.29	20.89	4.41	0.07	0
Lng1125	G	42.57	0.84	19.87	2.17	8.59	0.29	20.89	4.41	0.07	0
Lng1126	G	39.37	0.09	21.61	0	23.66	0.48	10.08	5.56	0.05	0
Lng1126	G	39.37	0.09	21.61	0	23.66	0.48	10.08	5.56	0.05	0
Lng1128	G	41.17	0.94	19.76	2.05	9.98	0.31	20.47	4.51	0.08	0.01
Lng1128	G	41.17	0.94	19.76	2.05	9.98	0.31	20.47	4.51	0.08	0.01
Lng1129	G	43.16	0.89	21.39	0.42	8.69	0.24	21.28	4.17	0.08	0
Lng1129	G	43.16	0.89	21.39	0.42	8.69	0.24	21.28	4.17	0.08	0
Lng1130	G	42.68	0.44	17.21	6.39	7.48	0.36	19.88	5.54	0.03	0.01
Lng1130	G	42.68	0.44	17.21	6.39	7.48	0.36	19.88	5.54	0.03	0.01
Lng1131	G	41.65	0.7	18.21	5.75	7.19	0.33	20.21	5.41	0.09	0
Lng1131	G	41.65	0.7	18.21	5.75	7.19	0.33	20.21	5.41	0.09	0
Lng1132	G	42.49	1.11	19.57	2.2	8.89	0.28	20.75	4.47	0.07	0
Lng1132	G	42.49	1.11	19.57	2.2	8.89	0.28	20.75	4.47	0.07	0
Lng1133	G	41.8	0.98	19.39	2.55	10.17	0.36	19.68	4.7	0.07	0
Lng1133	G	41.8	0.98	19.39	2.55	10.17	0.36	19.68	4.7	0.07	0
Lng1134	G	42.59	0.85	19.88	2.57	8.46	0.29	20.6	4.56	0.09	0
Lng1134	G	42.59	0.85	19.88	2.57	8.46	0.29	20.6	4.56	0.09	0
Lng1135	G	42.7	0.88	21.52	0.14	8.96	0.26	21.08	4.16	0.08	0.01
Lng1135	G	42.7	0.88	21.52	0.14	8.96	0.26	21.08	4.16	0.08	0.01
Lng1136	G	41.73	0.98	16.99	6.41	8.3	0.38	19.5	5.33	0.09	0
Lng1136	G	41.73	0.98	16.99	6.41	8.3	0.38	19.5	5.33	0.09	0
Lng1137	G	41.22	1.27	15.91	6.6	9.41	0.38	18.95	5.84	0.08	0
Lng1137	G	41.22	1.27	15.91	6.6	9.41	0.38	18.95	5.84	0.08	0
Lng1138	G	38.98	0.08	20.9	0.01	26.99	0.86	6.87	5.25	0.06	0.01
Lng1138	G	38.98	0.08	20.9	0.01	26.99	0.86	6.87	5.25	0.06	0.01
Lng1139	G	40.59	0.2	18.69	6.45	8.25	0.49	18.98	5.43	0.05	0
Lng1139	G	40.59	0.2	18.69	6.45	8.25	0.49	18.98	5.43	0.05	0
Lng1140	G	41.82	0.32	19.21	5.35	8.62	0.47	19.62	4.54	0.08	0
Lng1140	G	41.82	0.32	19.21	5.35	8.62	0.47	19.62	4.54	0.08	0
Lng1141	G	42.26	0.94	20.07	1.69	9.71	0.35	20.19	4.48	0.07	0
Lng1141	G	42.26	0.94	20.07	1.69	9.71	0.35	20.19	4.48	0.07	0
Lng1142	G	42.62	0.75	18.53	5.03	7.44	0.38	20.26	5.05	0.08	0.01
Lng1142	G	42.62	0.75	18.53	5.03	7.44	0.38	20.26	5.05	0.08	0.01
Lng1143	G	42.47	0.1	20.84	3.61	8.74	0.45	19.74	4.74	0.04	0
Lng1143	G	42.47	0.1	20.84	3.61	8.74	0.45	19.74	4.74	0.04	0
Lng1144	G	41.81	0.89	19.96	2.41	9.14	0.29	20.23	4.57	0.08	0.01
Lng1144	G	41.81	0.89	19.96	2.41	9.14	0.29	20.23	4.57	0.08	0.01
Lng1145	G	41.88	0.99	19.43	2.44	10.1	0.36	19.83	4.69	0.09	0
Lng1145	G	41.88	0.99	19.43	2.44	10.1	0.36	19.83	4.69	0.09	0
Lng1146	G	41.6	0.14	19.3	5.15	8.37	0.48	19.17	5.18	0.05	0
Lng1146	G	41.6	0.14	19.3	5.15	8.37	0.48	19.17	5.18	0.05	0
Lng1147	G	41.05	1.17	14.48	8.91	7.14	0.36	18.74	7.42	0.12	0
Lng1147	G	41.05	1.17	14.48	8.91	7.14	0.36	18.74	7.42	0.12	0
Lng1148	G	38.77	0.05	21.23	0.06	27.23	0.62	7.18	4.79	0.02	0.01
Lng1148	G	38.77	0.05	21.23	0.06	27.23	0.62	7.18	4.79	0.02	0.01
Lng1149	G	41.9	0.31	19.98	4.07	9.1	0.49	18.93	5	0.07	0
Lng1149	G	41.9	0.31	19.98	4.07	9.1	0.49	18.93	5	0.07	0
Lng1150	G	42.59	0.67	18.29	5.76	7.19	0.4	20.11	5.25	0.07	0
Lng1150	G	42.59	0.67	18.29	5.76	7.19	0.4	20.11	5.25	0.07	0
Lng1151	G	41.87	0.01	18.13	6.86	8.21	0.47	18.19	6.19	0.03	0
Lng1151	G	41.87	0.01	18.13	6.86	8.21	0.47	18.19	6.19	0.03	0
Lng1152	G	40.83	0.17	16.82	7.87	6.92	0.32	21.01	5.2	0.05	0
Lng1152	G	40.83	0.17	16.82	7.87	6.92	0.32	21.01	5.2	0.05	0
Lng1153	G	42.02	0.86	20.85	1.19	11	0.37	19.55	4.33	0.07	0
Lng1153	G	42.02	0.86	20.85	1.19	11	0.37	19.55	4.33	0.07	0
Lng1154	G	41.28	0.06	18.01	6.71	8.67	0.5	18.22	5.75	0.04	0
Lng1154	G	41.28	0.06	18.01	6.71	8.67	0.5	18.22	5.75	0.04	0
Lng1155	G	39.62	0.08	21.66	0.1	24.01	0.54	9.58	5.24	0.04	0
Lng1155	G	39.62	0.08	21.66	0.1	24.01	0.54	9.58	5.24	0.04	0
Lng1156	G	40.64	0.2	19.78	5.05	8.23	0.51	19.55	5.11	0.04	0
Lng1156	G	40.64	0.2	19.78	5.05	8.23	0.51	19.55	5.11	0.04	0
Lng1157	G	41.08	0.92	19.74	2.19	9.78	0.31	20.7	4.49	0.07	0
Lng1157	G	41.08	0.92	19.74	2.19	9.78	0.31	20.7	4.49	0.07	0
Lng1158	G	40.82	0.14	17.79	7.41	7.99	0.52	19.14	5.52	0.06	0
Lng1158	G	40.82	0.14	17.79	7.41	7.99	0.52	19.14	5.52	0.06	0
Lng1160	G	42.3	0.86	19.57	2.94	8.41	0.26	20.81	4.45	0.07	0.01
Lng1160	G	42.3	0.86	19.57	2.94	8.41	0.26	20.81	4.45	0.07	0.01
Lng1161	G	42.93	0.85	19.69	2.46	8.39	0.26	20.87	4.47	0.07	0
Lng1161	G	42.93	0.85	19.69	2.46	8.39	0.26	20.87	4.47	0.07	0
Lng1162	G	42.35	0.98	19.36	2.51	9.97	0.35	19.7	4.73	0.07	0
Lng1162	G	42.35	0.98	19.36	2.51	9.97	0.35	19.7	4.73	0.07	0
Lng1163	G	42.24	0.46	17.27	6.46	7.5	0.33	19.66	5.47	0.05	0
Lng1163	G	42.24	0.46	17.27	6.46	7.5	0.33	19.66	5.47	0.05	0
Lng1164	G	41.57	0.96	18.37	3.85	9.7	0.35	19.35	5	0.07	0
Lng1164	G	41.57	0.96	18.37	3.85	9.7	0.35	19.35	5	0.07	0
Lng1166	G	42.19	0.95	19.38	2.56	9.63	0.31	19.68	4.62	0.07	0
Lng1166	G	42.19	0.95	19.38	2.56	9.63	0.31	19.68	4.62	0.07	0
Lng1167	G	42.38	0.96	19.64	2.46	9.65	0.3	19.98	4.54	0.09	0
Lng1167	G	42.38	0.96	19.64	2.46	9.65	0.3	19.98	4.54	0.09	0
Lng1168	G	41.81	0.94	18.4	3.87	9.91	0.31	19.42	4.97	0.08	0
Lng1168	G	41.81	0.94	18.4	3.87	9.91	0.31	19.42	4.97	0.08	0
Lng1169	G	41.7	0.79	21.16	1.62	8.13	0.28	21.46	4.25	0.06	0
Lng1169	G	41.7	0.79	21.16	1.62	8.13	0.28	21.46	4.25	0.06	0
Lng1170	G	42.59	0.83	17.67	5.19	7.83	0.41	20.15	5.19	0.08	0
Lng1170	G	42.59	0.83	17.67	5.19	7.83	0.41	20.15	5.19	0.08	0
Lng1171	G	41.33	1.24	18.1	5.13	9.1	0.33	19.84	5.23	0.22	0.4
Lng1171	G	41.33	1.24	18.1	5.13	9.1	0.33	19.84	5.23	0.22	0.4
Lng1172	G	39.73	0.04	21.47	0.02	24.85	0.48	8.67	5.38	0.01	0.01
Lng1172	G	39.73	0.04	21.47	0.02	24.85	0.48	8.67	5.38	0.01	0.01
Lng1173	G	39.42	0.12	21.15	0	25.45	0.38	7.55	6.68	0.05	0
Lng1173	G	39.42	0.12	21.15	0	25.45	0.38	7.55	6.68	0.05	0
Lng1174	G	42.46	0.11	21.4	2.65	8.52	0.44	19.77	4.47	0.04	0
Lng1174	G	42.46	0.11	21.4	2.65	8.52	0.44	19.77	4.47	0.04	0
Lng1175	G	41.55	0.76	18	5.37	7.93	0.36	20.06	4.97	0.07	0
Lng1175	G	41.55	0.76	18	5.37	7.93	0.36	20.06	4.97	0.07	0
Lng1176	G	41.06	0.08	18.13	6.57	8.53	0.54	18.61	5.75	0.04	0
Lng1176	G	41.06	0.08	18.13	6.57	8.53	0.54	18.61	5.75	0.04	0
Lng1177	G	42.62	1	19.33	2.64	9.54	0.36	19.84	4.72	0.07	0.01
Lng1177	G	42.62	1	19.33	2.64	9.54	0.36	19.84	4.72	0.07	0.01
Lng1178	G	40.99	0.08	17.82	6.94	8.48	0.51	18.59	5.86	0.04	0
Lng1178	G	40.99	0.08	17.82	6.94	8.48	0.51	18.59	5.86	0.04	0
Lng1179	G	40.9	0.74	17.83	5.33	7.85	0.29	21.35	4.91	0.07	0
Lng1179	G	40.9	0.74	17.83	5.33	7.85	0.29	21.35	4.91	0.07	0
Lng1180	G	40.94	0.96	15.88	7.12	8.12	0.31	20.38	5.6	0.08	0
Lng1180	G	40.94	0.96	15.88	7.12	8.12	0.31	20.38	5.6	0.08	0
Lng1184	G	40.88	0.27	17.19	7.92	8.15	0.51	18.45	6	0.06	0
Lng1184	G	40.88	0.27	17.19	7.92	8.15	0.51	18.45	6	0.06	0
Lng1185	G	41.13	0.58	14.86	10.54	7.51	0.46	19.64	4.97	0.1	0.01
Lng1185	G	41.13	0.58	14.86	10.54	7.51	0.46	19.64	4.97	0.1	0.01
Lng1186	G	41.63	1.18	14.06	9.8	7.48	0.33	19.35	6.88	0.07	0
Lng1186	G	41.63	1.18	14.06	9.8	7.48	0.33	19.35	6.88	0.07	0
Lng1187	G	42.28	0.18	19.99	4.8	8.33	0.51	19.25	5.33	0.04	0
Lng1187	G	42.28	0.18	19.99	4.8	8.33	0.51	19.25	5.33	0.04	0
Lng1188	G	42.24	0.99	16.17	6.47	7.57	0.27	21.28	5.46	0.07	0
Lng1188	G	42.24	0.99	16.17	6.47	7.57	0.27	21.28	5.46	0.07	0
Lng1189	G	41.63	0.32	19.25	5.17	8.64	0.51	19.15	5.54	0.07	0.01
Lng1189	G	41.63	0.32	19.25	5.17	8.64	0.51	19.15	5.54	0.07	0.01
Lng1190	G	42.3	0.97	20.94	0.99	10.23	0.39	19.86	4.53	0.07	0
Lng1190	G	42.3	0.97	20.94	0.99	10.23	0.39	19.86	4.53	0.07	0
Lng1191	G	39.05	0.06	21.47	0.08	25.48	0.79	8.55	5.25	0.05	0
Lng1191	G	39.05	0.06	21.47	0.08	25.48	0.79	8.55	5.25	0.05	0
Lng1193	G	41.78	1.07	17.44	4.85	8.62	0.3	20.55	4.96	0.09	0
Lng1193	G	41.78	1.07	17.44	4.85	8.62	0.3	20.55	4.96	0.09	0
Lng1194	G	42.44	0.83	19.91	2.45	8.3	0.29	20.76	4.62	0.07	0
Lng1194	G	42.44	0.83	19.91	2.45	8.3	0.29	20.76	4.62	0.07	0
Lng1195	G	41.46	0.55	14.52	10.69	7.13	0.39	20.23	5.2	0.09	0
Lng1195	G	41.46	0.55	14.52	10.69	7.13	0.39	20.23	5.2	0.09	0
Lng12	G	40.99	0.94	19.92	2.38	9.64	0.36	20.13	4.63	0.07	0
Lng12	G	41.27	0.41	16.67	8.22	7.02	0.39	20.53	4.62	0.08	0
Lng12	G	41.4	0.99	18.91	2.85	10	0.31	19.81	4.91	0.08	0.01
Lng12	G	42.33	2.14	20.53	0.2	9.81	0.31	20.33	4.7	0.11	0.01
Lng12	G	40.99	0.94	19.92	2.38	9.64	0.36	20.13	4.63	0.07	0
Lng12	G	41.27	0.41	16.67	8.22	7.02	0.39	20.53	4.62	0.08	0
Lng12	G	41.4	0.99	18.91	2.85	10	0.31	19.81	4.91	0.08	0.01
Lng12	G	42.33	2.14	20.53	0.2	9.81	0.31	20.33	4.7	0.11	0.01
Lng13	G	42.09	0.85	19.75	2.82	9.75	0.34	19.39	4.91	0.08	0
Lng13	G	42.09	0.85	19.75	2.82	9.75	0.34	19.39	4.91	0.08	0
Lng14	G	39.11	0.07	21.59	0.11	23.98	0.78	8.63	5.41	0.04	0.01
Lng14	G	39.11	0.07	21.59	0.11	23.98	0.78	8.63	5.41	0.04	0.01
Lng15	G	40.74	1.12	21.1	3.06	10.14	0.38	19.25	5.1	0.1	0
Lng15	G	40.74	1.12	21.1	3.06	10.14	0.38	19.25	5.1	0.1	0
Lng16	G	42	0.16	20.03	4.44	8.95	0.55	19.23	4.66	0.06	0
Lng16	G	42	0.16	20.03	4.44	8.95	0.55	19.23	4.66	0.06	0
Lng17	G	42.61	0.88	21.44	0.1	8.79	0.3	19.18	6.51	0.07	0
Lng17	G	42.61	0.88	21.44	0.1	8.79	0.3	19.18	6.51	0.07	0
Lng18	G	42.5	0.03	19.74	5.38	7.78	0.45	21.17	2.88	0.03	0
Lng18	G	42.5	0.03	19.74	5.38	7.78	0.45	21.17	2.88	0.03	0
Lng19	G	40.91	0.89	15.47	8.12	7.36	0.32	19.89	6.01	0.09	0.01
Lng19	G	40.91	0.89	15.47	8.12	7.36	0.32	19.89	6.01	0.09	0.01
Lng1Lng1	G	39.97	1.22	12.05	11.66	8.3	0.38	19.83	7.43	0.1	0
Lng1Lng1	G	39.97	1.22	12.05	11.66	8.3	0.38	19.83	7.43	0.1	0
Lng20	G	38.96	0.02	20.95	0.01	28.87	0.55	6.17	5.2	0.03	0
Lng20	G	38.96	0.02	20.95	0.01	28.87	0.55	6.17	5.2	0.03	0
Lng22	G	41.39	1.04	19.36	2.54	10.03	0.34	19.84	4.82	0.07	0
Lng22	G	41.39	1.04	19.36	2.54	10.03	0.34	19.84	4.82	0.07	0
Lng23	G	42.08	0.03	19.32	5.51	7.53	0.42	21.47	2.89	0.03	0.01
Lng23	G	42.08	0.03	19.32	5.51	7.53	0.42	21.47	2.89	0.03	0.01
Lng24	G	42.63	0.17	20.88	3.88	8.84	0.51	19.25	4.71	0.04	0
Lng24	G	42.63	0.17	20.88	3.88	8.84	0.51	19.25	4.71	0.04	0
Lng25	G	38.94	0.09	21.17	0.02	26.13	1.11	6.5	6.11	0.03	0.01
Lng25	G	38.94	0.09	21.17	0.02	26.13	1.11	6.5	6.11	0.03	0.01
Lng26	G	41.19	0.23	17.37	7.73	8.41	0.52	17.89	6.19	0.05	0.01
Lng26	G	41.19	0.23	17.37	7.73	8.41	0.52	17.89	6.19	0.05	0.01
Lng27	G	41.51	0.51	17.03	7.57	7.21	0.39	19.9	5.38	0.08	0
Lng27	G	41.51	0.51	17.03	7.57	7.21	0.39	19.9	5.38	0.08	0
Lng28	G	38.64	0.07	20.9	0.08	27.51	1.12	6.65	6.01	0.02	0
Lng28	G	38.64	0.07	20.9	0.08	27.51	1.12	6.65	6.01	0.02	0
Lng29	G	39.58	0.04	21.49	0.11	23.08	0.57	9.44	5.41	0.04	0.01
Lng29	G	39.58	0.04	21.49	0.11	23.08	0.57	9.44	5.41	0.04	0.01
Lng30	G	42.28	0.93	19.67	2.22	9.83	0.33	19.88	4.7	0.09	0
Lng30	G	42.28	0.93	19.67	2.22	9.83	0.33	19.88	4.7	0.09	0
Lng31	G	42.29	0.89	19.22	3.12	8.53	0.29	20.63	4.65	0.06	0
Lng31	G	42.29	0.89	19.22	3.12	8.53	0.29	20.63	4.65	0.06	0
Lng32	G	42.94	0.89	20.31	1.83	7.97	0.27	21.57	4.41	0.08	0.01
Lng32	G	42.33	2.09	20.5	0.25	9.66	0.31	20.42	4.76	0.08	0
Lng32	G	42.94	0.89	20.31	1.83	7.97	0.27	21.57	4.41	0.08	0.01
Lng32	G	42.33	2.09	20.5	0.25	9.66	0.31	20.42	4.76	0.08	0
Lng33	G	41.07	1.36	15.69	7.3	8.51	0.41	19.04	5.95	0.1	0.01
Lng33	G	41.07	1.36	15.69	7.3	8.51	0.41	19.04	5.95	0.1	0.01
Lng34	G	41.54	1.14	18.78	3.11	10.41	0.38	19.16	5.13	0.09	0
Lng34	G	41.54	1.14	18.78	3.11	10.41	0.38	19.16	5.13	0.09	0
Lng35	G	41.68	1.06	19.17	2.71	10.06	0.36	19.69	4.91	0.09	0
Lng35	G	41.68	1.06	19.17	2.71	10.06	0.36	19.69	4.91	0.09	0
Lng36	G	41.46	1.11	16.29	7.72	7.38	0.41	19.38	6.11	0.09	0
Lng36	G	41.46	1.11	16.29	7.72	7.38	0.41	19.38	6.11	0.09	0
Lng39	G	41.3	0.32	19.13	5	8.69	0.49	19.15	5.18	0.07	0
Lng39	G	41.3	0.32	19.13	5	8.69	0.49	19.15	5.18	0.07	0
Lng41	G	42.29	1	19.82	2.26	10.15	0.33	20.1	4.77	0.07	0
Lng41	G	42.29	1	19.82	2.26	10.15	0.33	20.1	4.77	0.07	0
Lng42	G	42.38	0.9	19.94	2.48	8.26	0.27	21.15	4.54	0.09	0
Lng42	G	42.38	0.9	19.94	2.48	8.26	0.27	21.15	4.54	0.09	0
Lng43	G	41.38	0.79	20.77	0.44	12.25	0.55	14.59	9.08	0.11	0
Lng43	G	41.38	0.79	20.77	0.44	12.25	0.55	14.59	9.08	0.11	0
Lng44	G	40.73	1.32	15.02	7.61	10.24	0.36	18.16	6.52	0.11	0.01
Lng44	G	40.73	1.32	15.02	7.61	10.24	0.36	18.16	6.52	0.11	0.01
Lng45	G	40.92	1.21	16.29	6.12	9.96	0.34	18.75	5.82	0.09	0
Lng45	G	40.92	1.21	16.29	6.12	9.96	0.34	18.75	5.82	0.09	0
Lng46	G	41.98	0.86	19.87	2.56	9.54	0.32	19.75	4.9	0.07	0
Lng46	G	41.98	0.86	19.87	2.56	9.54	0.32	19.75	4.9	0.07	0
Lng47	G	42.03	0.97	19.44	2.37	10.04	0.34	19.95	4.79	0.07	0
Lng47	G	42.03	0.97	19.44	2.37	10.04	0.34	19.95	4.79	0.07	0
Lng48	G	41.78	0.94	19.52	2.21	9.97	0.36	20.1	4.71	0.08	0
Lng48	G	41.78	0.94	19.52	2.21	9.97	0.36	20.1	4.71	0.08	0
Lng49	G	42	0.91	20.79	0.57	9.09	0.25	20.66	4.71	0.09	0
Lng49	G	42	0.91	20.79	0.57	9.09	0.25	20.66	4.71	0.09	0
Lng50	G	41.54	0.32	19.54	4.87	8.15	0.44	19.89	5.21	0.07	0
Lng50	G	41.54	0.32	19.54	4.87	8.15	0.44	19.89	5.21	0.07	0
Lng51	G	41.24	0.92	17.53	5.38	7.89	0.27	20.76	5.14	0.05	0
Lng51	G	41.24	0.92	17.53	5.38	7.89	0.27	20.76	5.14	0.05	0
Lng52	G	41.35	0.52	19.06	3.22	7.86	0.3	20.93	4.71	0.05	0
Lng52	G	41.35	0.52	19.06	3.22	7.86	0.3	20.93	4.71	0.05	0
Lng53	G	42.15	0.95	19.8	2.23	9.98	0.31	19.77	4.68	0.09	0
Lng53	G	42.15	0.95	19.8	2.23	9.98	0.31	19.77	4.68	0.09	0
Lng54	G	41.34	1.17	17.13	5.35	7.99	0.27	20.68	5.08	0.1	0
Lng54	G	41.34	1.17	17.13	5.35	7.99	0.27	20.68	5.08	0.1	0
Lng55	G	42.24	0.79	21.12	0.56	8.83	0.23	21.23	4.25	0.07	0
Lng55	G	42.24	0.79	21.12	0.56	8.83	0.23	21.23	4.25	0.07	0
Lng56	G	41.35	0.35	18.51	6	8.43	0.48	18.71	5.71	0.06	0
Lng56	G	41.35	0.35	18.51	6	8.43	0.48	18.71	5.71	0.06	0
Lng57	G	39.1	0.04	21.13	0.02	26.52	0.79	7.44	5.78	0.05	0
Lng57	G	39.1	0.04	21.13	0.02	26.52	0.79	7.44	5.78	0.05	0
Lng58	G	42.14	0.99	19.48	2.48	9.82	0.35	19.81	4.74	0.07	0
Lng58	G	42.14	0.99	19.48	2.48	9.82	0.35	19.81	4.74	0.07	0
Lng59	G	42.44	0.85	19.98	2.39	8.43	0.28	20.83	4.55	0.07	0
Lng59	G	42.44	0.85	19.98	2.39	8.43	0.28	20.83	4.55	0.07	0
Lng60	G	39.44	0.06	21.54	0.04	24.88	0.41	8.88	5.56	0.04	0.01
Lng60	G	39.44	0.06	21.54	0.04	24.88	0.41	8.88	5.56	0.04	0.01
Lng61	G	41.2	1.31	12.76	10.63	8.22	0.35	17.74	7.27	0.1	0
Lng61	G	41.2	1.31	12.76	10.63	8.22	0.35	17.74	7.27	0.1	0
Lng62	G	42.29	1.01	19.47	2.57	9.88	0.34	19.38	4.85	0.09	0
Lng62	G	42.29	1.01	19.47	2.57	9.88	0.34	19.38	4.85	0.09	0
Lng63	G	40.51	1.16	14.32	9.6	7.14	0.33	18.36	7.84	0.1	0
Lng63	G	40.51	1.16	14.32	9.6	7.14	0.33	18.36	7.84	0.1	0
Lng64	G	41.98	1.01	19.28	2.97	10.05	0.34	19.51	4.88	0.09	0
Lng64	G	41.98	1.01	19.28	2.97	10.05	0.34	19.51	4.88	0.09	0
Lng65	G	41.33	0.33	19.82	4.13	8.96	0.53	18.98	5.07	0.05	0
Lng65	G	41.33	0.33	19.82	4.13	8.96	0.53	18.98	5.07	0.05	0
Lng66	G	41.71	0.23	18.54	6.36	8.21	0.49	19.06	5.44	0.08	0
Lng66	G	41.71	0.23	18.54	6.36	8.21	0.49	19.06	5.44	0.08	0
Lng67	G	41.77	0.13	21.08	2.84	8.61	0.48	19.68	4.7	0.03	0.01
Lng67	G	41.77	0.13	21.08	2.84	8.61	0.48	19.68	4.7	0.03	0.01
Lng68	G	41.13	0.13	17.61	7.26	8.46	0.54	18.48	6.1	0.06	0
Lng68	G	41.13	0.13	17.61	7.26	8.46	0.54	18.48	6.1	0.06	0
Lng69	G	39.44	0.07	21.71	0.01	24.39	0.62	9.27	5.42	0.03	0
Lng69	G	39.44	0.07	21.71	0.01	24.39	0.62	9.27	5.42	0.03	0
Lng70	G	41.11	0.12	17.64	7.35	8.43	0.58	18.22	6.04	0.05	0
Lng70	G	41.11	0.12	17.64	7.35	8.43	0.58	18.22	6.04	0.05	0
Lng71	G	40.83	0.08	17.62	7.4	8.64	0.52	17.82	6.13	0.03	0
Lng71	G	40.83	0.08	17.62	7.4	8.64	0.52	17.82	6.13	0.03	0
Lng72	G	40.78	0.37	17.62	7.01	8.4	0.51	18.35	5.94	0.07	0
Lng72	G	40.78	0.37	17.62	7.01	8.4	0.51	18.35	5.94	0.07	0
Lng73	G	41.67	0.17	18.55	6.24	8.5	0.48	18.74	5.35	0.05	0.01
Lng73	G	41.67	0.17	18.55	6.24	8.5	0.48	18.74	5.35	0.05	0.01
Lng75	G	40.34	0.09	17.43	7.44	8.37	0.57	19.06	6.05	0.06	0.01
Lng75	G	40.34	0.09	17.43	7.44	8.37	0.57	19.06	6.05	0.06	0.01
Lng76	G	42.71	0.9	19.41	3.22	8.49	0.3	20.6	4.69	0.08	0
Lng76	G	42.71	0.9	19.41	3.22	8.49	0.3	20.6	4.69	0.08	0
Lng77	G	42.08	0.54	20.06	3.68	7.35	0.33	21.07	4.44	0.07	0
Lng77	G	42.08	0.54	20.06	3.68	7.35	0.33	21.07	4.44	0.07	0
Lng78	G	41.93	0.98	19.57	2.24	9.78	0.35	20.06	4.63	0.07	0
Lng78	G	41.93	0.98	19.57	2.24	9.78	0.35	20.06	4.63	0.07	0
Lng79	G	42.1	0.92	20.57	1.25	9.06	0.32	19.28	5.94	0.08	0
Lng79	G	42.1	0.92	20.57	1.25	9.06	0.32	19.28	5.94	0.08	0
Lng80	G	41.45	0.19	19.67	4.7	8.24	0.48	19.72	4.92	0.03	0
Lng80	G	41.45	0.19	19.67	4.7	8.24	0.48	19.72	4.92	0.03	0
Lng81	G	38.64	0.05	20.95	0.04	27.76	1.17	6.16	6.05	0.03	0
Lng81	G	38.64	0.05	20.95	0.04	27.76	1.17	6.16	6.05	0.03	0
Lng82	G	41.21	0.28	18.42	6.19	8.21	0.54	18.49	5.77	0.09	0
Lng82	G	41.79	0.24	19.34	5.26	8.22	0.49	19.33	5.18	0.06	0
Lng82	G	41.21	0.28	18.42	6.19	8.21	0.54	18.49	5.77	0.09	0
Lng82	G	41.79	0.24	19.34	5.26	8.22	0.49	19.33	5.18	0.06	0
Lng83	G	42.02	0.8	18.53	4.35	7.45	0.31	20.59	4.89	0.06	0
Lng83	G	42.03	0.22	18.34	6.01	6.93	0.35	20.44	4.69	0.03	0
Lng83	G	42.02	0.8	18.53	4.35	7.45	0.31	20.59	4.89	0.06	0
Lng83	G	42.03	0.22	18.34	6.01	6.93	0.35	20.44	4.69	0.03	0
Lng85	G	41.78	0.96	19.71	2.22	9.9	0.32	19.51	4.61	0.08	0.02
Lng85	G	41.78	0.96	19.71	2.22	9.9	0.32	19.51	4.61	0.08	0.02
Lng86	G	41.63	0.06	19.1	5.62	8.2	0.54	19.82	4.7	0.06	0
Lng86	G	41.63	0.06	19.1	5.62	8.2	0.54	19.82	4.7	0.06	0
Lng90	G	41.32	0.99	20.43	2.12	9.94	0.34	19.8	4.64	0.08	0
Lng90	G	41.32	0.99	20.43	2.12	9.94	0.34	19.8	4.64	0.08	0
Lng91	G	41.63	1.12	19.03	2.79	9.94	0.37	19.75	4.86	0.07	0
Lng91	G	41.63	1.12	19.03	2.79	9.94	0.37	19.75	4.86	0.07	0
Lng94	G	41.58	0.11	20.15	3.91	8.9	0.51	19.85	4.34	0.04	0.01
Lng94	G	41.58	0.11	20.15	3.91	8.9	0.51	19.85	4.34	0.04	0.01
Lng95	G	39.97	1.19	11.95	11.81	7.99	0.4	19.26	7.44	0.1	0
Lng95	G	39.97	1.19	11.95	11.81	7.99	0.4	19.26	7.44	0.1	0
Lng96	G	38.48	0.07	20.84	0	28.6	0.88	6.56	5.38	0.06	0
Lng96	G	38.48	0.07	20.84	0	28.6	0.88	6.56	5.38	0.06	0
Lng97	G	42.46	0.8	20.07	2.27	8.24	0.29	21.35	4.39	0.06	0
Lng97	G	42.46	0.8	20.07	2.27	8.24	0.29	21.35	4.39	0.06	0
Lng98	G	41.65	0.16	19.13	5.59	8.3	0.49	18.87	5.37	0.04	0.01
Lng98	G	41.65	0.16	19.13	5.59	8.3	0.49	18.87	5.37	0.04	0.01
Lng99	G	39.86	1.26	12.6	11.77	8.32	0.34	17.35	7.52	0.11	0
Lng99	G	39.86	1.26	12.6	11.77	8.32	0.34	17.35	7.52	0.11	0
Lng040	I		50.35	0.51	0.76	37.24	0.31	9.93	0.1	0.4
Lng040	I		50.35	0.51	0.76	37.24	0.31	9.93	0.1	0.4
Lng041	I		50.43	0.49	0.87	36.88	0.29	10.16	0.12	0.28
Lng041	I		50.43	0.49	0.87	36.88	0.29	10.16	0.12	0.28
Lng042	I		50.51	0.48	0.89	37.24	0.3	9.99	0.15	0.34
Lng042	I		50.51	0.48	0.89	37.24	0.3	9.99	0.15	0.34
Lng043	I		50.62	0.48	0.94	36.14	0.3	10.44	0.1	0.18
Lng043	I		50.62	0.48	0.94	36.14	0.3	10.44	0.1	0.18
Lng044	I		50.62	0.5	0.62	36.84	0.29	9.97	0.08	0.2
Lng044	I		50.62	0.5	0.62	36.84	0.29	9.97	0.08	0.2
Lng045	I		50.64	0.47	0.61	36.84	0.3	10.18	0.14	0.3
Lng045	I		50.64	0.47	0.61	36.84	0.3	10.18	0.14	0.3
Lng046	I		50.67	0.49	0.94	36.8	0.29	9.96	0.09	0.25
Lng046	I		50.67	0.49	0.94	36.8	0.29	9.96	0.09	0.25
Lng047	I		50.77	0.47	0.78	36.98	0.31	9.83	0.12	0.38
Lng047	I		50.77	0.47	0.78	36.98	0.31	9.83	0.12	0.38
Lng048	I		50.85	0.54	0.6	35.51	0.27	11.08	0.1	0.37
Lng048	I		50.85	0.54	0.6	35.51	0.27	11.08	0.1	0.37
Lng049	I		50.88	0.5	0.52	36.32	0.32	10.54	0.08	0.52
Lng049	I		50.88	0.5	0.52	36.32	0.32	10.54	0.08	0.52
Lng050	I		50.92	0.48	1.14	36.93	0.33	9.88	0.11	0.14
Lng050	I		50.92	0.48	1.14	36.93	0.33	9.88	0.11	0.14
Lng051	I		51.05	0.5	1.06	36.84	0.31	9.82	0.12	0.24
Lng051	I		51.05	0.5	1.06	36.84	0.31	9.82	0.12	0.24
Lng052	I		51.14	0.47	0.71	36.03	0.3	10.41	0.1	0.4
Lng052	I		51.14	0.47	0.71	36.03	0.3	10.41	0.1	0.4
Lng053	I		51.18	0.5	0.56	36.26	0.29	10.59	0.09	0.42
Lng053	I		51.18	0.5	0.56	36.26	0.29	10.59	0.09	0.42
Lng054	I		51.3	0.48	0.52	36.1	0.28	10.58	0.11	0.44
Lng054	I		51.3	0.48	0.52	36.1	0.28	10.58	0.11	0.44
Lng055	I		51.33	0.46	0.55	35.92	0.27	10.69	0.08	0.29
Lng055	I		51.33	0.46	0.55	35.92	0.27	10.69	0.08	0.29
Lng056	I		51.37	0.48	0.47	35.18	0.27	10.81	0.08	0.52
Lng056	I		51.37	0.48	0.47	35.18	0.27	10.81	0.08	0.52
Lng057	I		51.38	0.52	0.44	35.43	0.27	10.68	0.08	0.46
Lng057	I		51.38	0.52	0.44	35.43	0.27	10.68	0.08	0.46
Lng058	I		51.38	0.56	0.77	34.34	0.31	11.94	0.11	0.39
Lng058	I		51.38	0.56	0.77	34.34	0.31	11.94	0.11	0.39
Lng059	I		51.45	0.5	0.58	36.23	0.27	10.21	0.1	0.15
Lng059	I		51.45	0.5	0.58	36.23	0.27	10.21	0.1	0.15
Lng060	I		51.47	0.49	0.56	36.32	0.3	10.18	0.09	0.29
Lng060	I		51.47	0.49	0.56	36.32	0.3	10.18	0.09	0.29
Lng061	I		51.5	0.46	0.59	34.82	0.25	11	0.11	0.45
Lng061	I		51.5	0.46	0.59	34.82	0.25	11	0.11	0.45
Lng062	I		51.56	0.59	0.53	35.37	0.25	11.02	0.11	0.42
Lng062	I		51.56	0.59	0.53	35.37	0.25	11.02	0.11	0.42
Lng063	I		51.6	0.49	0.82	33.52	0.21	11.57	0.13	0.83
Lng063	I		51.6	0.49	0.82	33.52	0.21	11.57	0.13	0.83
Lng064	I		51.69	0.5	0.65	34.66	0.27	11.17	0.11	0.68
Lng064	I		51.69	0.5	0.65	34.66	0.27	11.17	0.11	0.68
Lng065	I		51.69	0.51	0.66	34.45	0.27	11.38	0.11	0.51
Lng065	I		51.69	0.51	0.66	34.45	0.27	11.38	0.11	0.51
Lng066	I		51.76	0.49	0.48	35.93	0.27	10.49	0.09	0.41
Lng066	I		51.76	0.49	0.48	35.93	0.27	10.49	0.09	0.41
Lng067	I		51.78	0.46	0.52	34.91	0.26	10.75	0.1	0.35
Lng067	I		51.78	0.46	0.52	34.91	0.26	10.75	0.1	0.35
Lng068	I		51.84	0.5	0.76	33.97	0.27	11.63	0.17	0.75
Lng068	I		51.84	0.5	0.76	33.97	0.27	11.63	0.17	0.75
Lng069	I		51.86	0.51	0.5	35.08	0.27	10.83	0.1	0.17
Lng069	I		51.86	0.51	0.5	35.08	0.27	10.83	0.1	0.17
Lng070	I		51.86	0.5	0.64	34.45	0.26	11.34	0.1	0.57
Lng070	I		51.86	0.5	0.64	34.45	0.26	11.34	0.1	0.57
Lng071	I		51.94	0.48	0.53	35.39	0.27	10.66	0.09	0.48
Lng071	I		51.94	0.48	0.53	35.39	0.27	10.66	0.09	0.48
Lng072	I		51.96	0.53	0.66	33.11	0.25	12.28	0.14	0.6
Lng072	I		51.96	0.53	0.66	33.11	0.25	12.28	0.14	0.6
Lng073	I		51.98	0.5	0.52	34.77	0.29	11.2	0.12	0.24
Lng073	I		51.98	0.5	0.52	34.77	0.29	11.2	0.12	0.24
Lng074	I		52.12	0.5	1.19	32.91	0.23	11.83	0.14	0.52
Lng074	I		52.12	0.5	1.19	32.91	0.23	11.83	0.14	0.52
Lng075	I		52.14	0.52	0.62	34.96	0.32	11.1	0.09	0.18
Lng075	I		52.14	0.52	0.62	34.96	0.32	11.1	0.09	0.18
Lng076	I		52.19	0.51	0.62	34.37	0.32	11.34	0.12	0.4
Lng076	I		52.19	0.51	0.62	34.37	0.32	11.34	0.12	0.4
Lng077	I		52.23	0.49	0.46	35.02	0.32	10.89	0.1	0.26
Lng077	I		52.23	0.49	0.46	35.02	0.32	10.89	0.1	0.26
Lng078	I		52.26	0.54	0.46	32.47	0.32	12.71	0.09	0.4
Lng078	I		52.26	0.54	0.46	32.47	0.32	12.71	0.09	0.4
Lng079	I		52.28	0.51	0.68	34.34	0.27	11.17	0.09	0.44
Lng079	I		52.28	0.51	0.68	34.34	0.27	11.17	0.09	0.44
Lng080	I		52.33	0.48	0.58	34.51	0.26	11.23	0.12	0.27
Lng080	I		52.33	0.48	0.58	34.51	0.26	11.23	0.12	0.27
Lng081	I		52.34	0.46	0.54	34.16	0.28	11.01	0.11	0.04
Lng081	I		52.34	0.46	0.54	34.16	0.28	11.01	0.11	0.04
Lng082	I		52.35	0.47	0.65	34.49	0.29	10.93	0.11	0.3
Lng082	I		52.35	0.47	0.65	34.49	0.29	10.93	0.11	0.3
Lng083	I		52.39	0.48	0.69	34.02	0.25	11.24	0.1	0.32
Lng083	I		52.39	0.48	0.69	34.02	0.25	11.24	0.1	0.32
Lng084	I		52.44	0.54	0.75	33.78	0.25	11.56	0.13	0.22
Lng084	I		52.44	0.54	0.75	33.78	0.25	11.56	0.13	0.22
Lng085	I		52.46	0.5	0.65	35.16	0.25	10.42	0.1	0.41
Lng085	I		52.46	0.5	0.65	35.16	0.25	10.42	0.1	0.41
Lng086	I		52.46	0.44	0.63	33.62	0.25	11.32	0.13	0.31
Lng086	I		52.46	0.44	0.63	33.62	0.25	11.32	0.13	0.31
Lng087	I		52.46	0.49	0.64	34.03	0.27	11.59	0.11	0.27
Lng087	I		52.46	0.49	0.64	34.03	0.27	11.59	0.11	0.27
Lng088	I		52.47	0.46	0.82	33.55	0.27	11.55	0.15	0.25
Lng088	I		52.47	0.46	0.82	33.55	0.27	11.55	0.15	0.25
Lng089	I		52.5	0.5	0.84	33.13	0.27	11.55	0.12	0.16
Lng089	I		52.5	0.5	0.84	33.13	0.27	11.55	0.12	0.16
Lng090	I		52.5	0.63	2.58	29.75	0.27	12.78	0.21	0.53
Lng090	I		52.5	0.63	2.58	29.75	0.27	12.78	0.21	0.53
Lng091	I		52.51	0.5	0.75	33.17	0.28	11.59	0.1	0.35
Lng091	I		52.51	0.5	0.75	33.17	0.28	11.59	0.1	0.35
Lng092	I		52.55	0.6	1.22	32.04	0.27	12.47	0.14	0.23
Lng092	I		52.55	0.6	1.22	32.04	0.27	12.47	0.14	0.23
Lng093	I		52.57	0.52	0.69	33.74	0.27	11.56	0.1	0.34
Lng093	I		52.57	0.52	0.69	33.74	0.27	11.56	0.1	0.34
Lng094	I		52.58	0.61	0.67	33.31	0.29	11.64	0.11	0.09
Lng094	I		52.58	0.61	0.67	33.31	0.29	11.64	0.11	0.09
Lng095	I		52.6	0.53	0.96	33.09	0.28	12.04	0.14	0.16
Lng095	I		52.6	0.53	0.96	33.09	0.28	12.04	0.14	0.16
Lng096	I		52.72	0.52	0.97	31.53	0.45	12.68	0.11	0.4
Lng096	I		52.72	0.52	0.97	31.53	0.45	12.68	0.11	0.4
Lng097	I		52.72	0.51	0.9	33.47	0.29	11.53	0.14	0.33
Lng097	I		52.72	0.51	0.9	33.47	0.29	11.53	0.14	0.33
Lng098	I		52.81	0.5	0.75	33.71	0.23	11.18	0.16	0.26
Lng098	I		52.81	0.5	0.75	33.71	0.23	11.18	0.16	0.26
Lng099	I		52.82	0.49	0.94	33.12	0.26	11.57	0.13	0.17
Lng099	I		52.82	0.49	0.94	33.12	0.26	11.57	0.13	0.17
Lng100	I		52.82	0.48	0.76	33.45	0.29	11.3	0.14	0.03
Lng100	I		52.82	0.48	0.76	33.45	0.29	11.3	0.14	0.03
Lng101	I		52.84	0.49	0.9	32.47	0.26	12.1	0.14	0.17
Lng101	I		52.84	0.49	0.9	32.47	0.26	12.1	0.14	0.17
Lng102	I		52.88	0.53	0.8	32.81	0.25	11.88	0.13	0.09
Lng102	I		52.88	0.53	0.8	32.81	0.25	11.88	0.13	0.09
Lng103	I		52.89	0.51	0.86	32.87	0.25	11.51	0.13	0.1
Lng103	I		52.89	0.51	0.86	32.87	0.25	11.51	0.13	0.1
Lng104	I		52.95	0.57	0.75	32.99	0.25	11.54	0.13	0.17
Lng104	I		52.95	0.57	0.75	32.99	0.25	11.54	0.13	0.17
Lng105	I		52.96	0.51	0.87	33.06	0.23	11.46	0.14	0.18
Lng105	I		52.96	0.51	0.87	33.06	0.23	11.46	0.14	0.18
Lng106	I		52.97	0.6	0.87	32.76	0.26	11.32	0.13	0.17
Lng106	I		52.97	0.6	0.87	32.76	0.26	11.32	0.13	0.17
Lng107	I		52.99	0.44	0.49	31.88	0.51	12.67	0.12	0.22
Lng107	I		52.99	0.44	0.49	31.88	0.51	12.67	0.12	0.22
Lng108	I		52.99	0.49	0.81	33.39	0.28	11.61	0.14	0.21
Lng108	I		52.99	0.49	0.81	33.39	0.28	11.61	0.14	0.21
Lng109	I		53.04	0.51	0.79	33.32	0.29	11.4	0.14	0.31
Lng109	I		53.04	0.51	0.79	33.32	0.29	11.4	0.14	0.31
Lng110	I		53.04	0.44	0.67	32.93	0.32	11.98	0.12	0.34
Lng110	I		53.04	0.44	0.67	32.93	0.32	11.98	0.12	0.34
Lng111	I		53.08	0.48	0.86	32.74	0.3	11.88	0.14	0.15
Lng111	I		53.08	0.48	0.86	32.74	0.3	11.88	0.14	0.15
Lng112	I		53.12	0.54	0.77	33.05	0.28	11.48	0.12	0.09
Lng112	I		53.12	0.54	0.77	33.05	0.28	11.48	0.12	0.09
Lng113	I		53.17	0.5	1.11	31.48	0.25	12.25	0.15	0.08
Lng113	I		53.17	0.5	1.11	31.48	0.25	12.25	0.15	0.08
Lng114	I		53.18	0.47	0.83	32.7	0.27	11.69	0.14	0.24
Lng114	I		53.18	0.47	0.83	32.7	0.27	11.69	0.14	0.24
Lng115	I		53.19	0.53	1.19	30.28	0.24	13.13	0.19	0.25
Lng115	I		53.19	0.53	1.19	30.28	0.24	13.13	0.19	0.25
Lng116	I		53.19	0.51	1.21	32.14	0.27	11.94	0.16	0.23
Lng116	I		53.19	0.51	1.21	32.14	0.27	11.94	0.16	0.23
Lng117	I		53.46	0.51	0.81	32.8	0.25	11.79	0.12	0.11
Lng117	I		53.46	0.51	0.81	32.8	0.25	11.79	0.12	0.11
Lng118	I		53.89	0.45	0.66	30.53	0.52	13.09	0.06	0.09
Lng118	I		53.89	0.45	0.66	30.53	0.52	13.09	0.06	0.09
Lng119	I		54.04	0.48	0.59	36.02	0.24	7.97	0.08	0
Lng119	I		54.04	0.48	0.59	36.02	0.24	7.97	0.08	0
Lng120	I		54.23	0.57	1.01	31.48	0.31	11.98	0.13	0.1
Lng120	I		54.23	0.57	1.01	31.48	0.31	11.98	0.13	0.1
Lng121	I		54.38	0.58	0.8	29.12	0.4	13.7	0.16	0.21
Lng121	I		54.38	0.58	0.8	29.12	0.4	13.7	0.16	0.21
Lng122	I		55.96	0.04	0.1	34.65	0.57	8.06	0.02	0.4
Lng122	I		55.96	0.04	0.1	34.65	0.57	8.06	0.02	0.4
Lng123	I		65.34	0.15	0.21	32.2	0.09	0.9	0	0.56
Lng123	I		65.34	0.15	0.21	32.2	0.09	0.9	0	0.56
Lng09	S	0	0.02	66.23	0.12	6.84	0.04	24.51	0.05	0.02	0
Lng09	S	0	0.02	66.23	0.12	6.84	0.04	24.51	0.05	0.02	0
Lng09	S		0.02	66.23	0.12	6.84	0.04	24.51
Lng88	S	0	0.01	67.41	0.09	6.53	0.05	23.64	0.02	0.01	0
Lng88	S	0	0.01	67.41	0.09	6.53	0.05	23.64	0.02	0.01	0
Lng88	S		0.01	67.41	0.09	6.53	0.05	23.64
LNGS001	S		2.58	0.72	43.3	47.69	0.55	4.31
LNGS002	S		5.54	0.74	42.77	48.82	0.61	3.91
LNGS003	S		0.36	9.81	58.18	18.58	0.34	11
LNGS004	S		1.18	8.04	57.92	20.44	0.32	10.88
LNGS005	S		0.08	3.44	59.19	29.95	0.51	6.06
LNGS008	S		0.06	33	35.62	16.86	0.31	12.92
LNGS009	S		1.83	5.69	59.38	20.87	0.43	10.27
LNGS010	S		0.09	3.44	58.83	30.11	0.53	6.04
LNGS011	S		1.21	8.55	58.43	19.25	0.52	10.9
LNGS012	S		2.45	6.16	58.08	21.85	0.46	10.36
LNGS013	S		2.28	8.96	57.41	20.41	0.36	9.32
LNGS014	S		2.3	8.73	57.3	20.09	0.37	9.71
LNGS015	S		0.68	0.74	56.81	35.4	0.56	5.12
LNGS016	S		2.42	8.8	56.79	19.03	0.31	11.68
LNGS017	S		2.1	8.92	56.55	20.72	0.36	9.14
LNGS018	S		1.99	7.52	56.52	20.22	0.36	12.24
LNGS019	S		2.57	8.69	56.46	20.16	0.37	10.46
LNGS020	S		2.29	9.72	56.16	20.52	0.39	11.02
LNGS021	S		2.28	9.13	55.91	20.96	0.36	10.37
LNGS022	S		2.24	8.21	55.8	21.05	0.41	12.35
LNGS023	S		2.56	8.48	55.6	20.84	0.41	11.18
LNGS024	S		2.32	8.17	55.44	21.17	0.35	11.78
LNGS025	S		2.28	9.24	55.39	20.32	0.38	11.32
LNGS026	S		2.14	10.48	55.35	20.67	0.4	11.5
LNGS027	S		2.47	9.32	55.29	21	0.37	11.2
LNGS028	S		1.98	7.84	55.15	21.88	0.45	10.64
LNGS029	S		2.13	9.02	55.09	20.22	0.36	12.12
LNGS030	S		2.37	8.71	54.91	21.29	0.39	11.34
LNGS031	S		2.37	6.97	54.74	23.6	0.44	11.54
LNGS032	S		2.53	8.97	54.74	21.45	0.4	12.49
LNGS033	S		2.29	6.24	54.59	22.81	0.44	11.14
LNGS034	S		1.23	1.23	54.56	36.05	0.59	5.72
LNGS035	S		3.31	7.72	54.48	22.64	0.45	10.55
LNGS036	S		2.4	8.64	54.47	21.25	0.36	11.68
LNGS037	S		2.93	8.62	54.37	20.71	0.4	11.54
LNGS038	S		1.13	0.99	54.19	36.21	0.66	5.36
LNGS039	S		2.94	7.71	54.09	24.35	0.48	9.29
LNGS040	S		2.48	7.93	54	21.5	0.43	11.81
LNGS041	S		2.39	9.72	53.96	20.18	0.38	11.81
LNGS042	S		1.2	1.33	53.88	36.13	0.57	5.63
LNGS043	S		2.18	8.4	53.52	20.16	0.37	11.86
LNGS044	S		2.48	7.55	52.89	21.81	0.47	11.25
LNGS045	S		2.01	9.9	52.74	21.28	0.38	11.07
LNGS046	S		3.38	9.61	52.72	23.05	0.43	10.86
LNGS047	S		3.82	6.87	52.6	24.3	0.47	12.05
LNGS048	S		3.62	5.31	51.76	27.42	0.56	9.47
LNGS049	S		2.12	9.5	51.48	21.39	0.47	11.54
LNGS050	S		1.5	0.17	50.68	41.32	0.71	4.55
LNGS051	S		2.95	6.36	50.1	26.63	0.64	11.14
LNGS052	S		4.14	3.73	49.87	27.1	0.7	14.24
LNGS053	S		1.85	0.31	49.52	40.94	0.74	5.1
LNGS054	S		0.06	17.99	48.52	21.8	0.39	10.16
LNGS055	S		6.03	7.22	45.92	29.3	0.47	10.2
LNGS056	S		6.38	0.61	45.66	39.55	0.55	6.81
LNGS057	S		7.15	3.57	44.69	35.66	0.53	9.72
LNGS058	S		6.37	4.1	43.93	34.96	0.59	8.34
LNGS059	S		6.44	3.36	43.76	35.59	0.59	9.29
LNGS060	S		6.68	4.31	43.07	34.15	0.49	10.55
LNGS061	S		2.57	0.76	42.62	48.25	0.59	3.92
LNGS062	S		3.08	0.7	36.2	54.64	0.52	3.45
LNGS063	S		0.07	27.06	35.48	23.56	0.38	12.32
LNGS064	S		0.05	33.52	35.02	16.99	0.33	12.87
LNGS065	S		10.38	2.48	30.96	46.09	0.63	9.84
LNGS066	S		12.2	1.64	27.9	50.25	1.03	7.77
LNGS067	S		0.15	41.04	27.23	14.91	0.22	15.11
LNGS068	S		0.65	4.77	63.7	18.95	0.42	10.82
LNGS069	S		0.66	4.75	63.58	18.34	0.4	10.72
LNGS070	S		0.67	4.57	63.95	18.37	0.43	10.57
LNGS071	S		0.05	2.83	63.68	25.55	0.55	6.32
LNGS072	S		0.07	2.91	63.85	25.59	0.52	6.24
LNGS073	S		0.77	1.45	60.69	29.38	0.5	5.41
LNGS074	S		2.13	0.58	48.3	42.42	0.56	4.6
LNGS075	S		3.02	0.43	43.03	47.12	0.65	4.34
LNGS076	S		2.82	0.37	43.99	47.35	0.63	4.31
LNGS077	S		3.01	0.41	37.32	52.9	0.54	3.83
LNGS078	S		2.65	8.65	56.89	19.83	0.38	11.95
LNGS079	S		2.18	8.39	56.66	19.9	0.33	11.32
LNGS080	S		2.48	8.31	56.35	21.12	0.38	11.6
LNGS081	S		2.69	7.91	55.9	19.88	0.35	11.74
LNGS082	S		2.86	8.27	54.42	21.57	0.38	11.62
LNGS083	S		2.85	7.19	54.1	21.04	0.29	11.48
LNGS084	S		3.38	7.38	53.3	22.08	0.34	11.16
LNGS085	S		2.25	8.15	53.17	20.42	0.35	11.3
LNGS086	S		2.6	8.05	53.03	19.98	0.32	11.71
LNGS087	S		10.36	1.79	38	39.88	0.61	7.89
LNGS088	S		11.28	1.66	27.16	47.86	0.42	9.26
LNGS116	S		0.81	4.63	63	18.95	0.35	12.08
LNGS117	S		0.19	5.08	65.05	17.98	0.43	11.34
LNGS118	S		0.8	5.21	62.72	19.31	0.34	11.75
LNGS119	S		0.18	5.32	65.08	18.27	0.4	11.52
LNGS120	S		0.76	5.52	64.9	16.81	0.33	12.69
LNGS121	S		0	5.6	65.22	16.41	0.36	12.53
LNGS122	S		0.13	5.91	64.9	17.13	0.33	12.61
LNGS123	S		0.08	5.93	64.46	17.67	0.36	12.14
LNGS124	S		0.8	5.93	62.25	18.84	0.33	11.99
LNGS125	S		0.11	5.89	65.47	16.62	0.38	11.37
LNGS126	S		0.28	5.97	63.89	15.87	0.34	13.27
LNGS127	S		0.28	6.01	64.24	15.56	0.34	13.43
LNGS128	S		0.21	5.87	63.05	17.59	0.35	11.61
LNGS129	S		0.55	5.92	61.14	18.33	0.39	11.99
LNGS130	S		0.27	6.02	63.88	15.63	0.34	13.11
LNGS131	S		0.06	6.17	64.62	18.71	0.36	11.75
LNGS132	S		0.1	5.96	63.06	17.03	0.36	11.53
LNGS133	S		0.02	6.21	65.64	16.37	0.34	12.64
LNGS134	S		0.09	6.09	62.33	17.75	0.35	12.01
LNGS135	S		1.11	6.22	63.34	18.17	0.37	11.83
LNGS136	S		0.09	6.15	62.83	17.96	0.36	11.82
LNGS137	S		0.07	6.32	65.04	17.67	0.37	11.78
LNGS138	S		0.08	6.36	64.82	17.69	0.34	11.93
LNGS139	S		0.34	6.23	63.7	17.81	0.33	11.12
LNGS140	S		0.07	6.27	63.31	17.58	0.31	11.82
LNGS141	S		0.1	6.26	63.28	17.25	0.36	11.95
LNGS142	S		0.08	6.42	65.13	17.83	0.37	11.89
LNGS143	S		0.25	6.49	64.27	17.05	0.33	12.68
LNGS144	S		0.08	6.52	64.88	17.81	0.35	12
LNGS145	S		0.08	6.51	64.47	17.77	0.35	11.93
LNGS146	S		0.08	6.4	62.36	17.33	0.34	11.8
LNGS147	S		0.07	6.61	65.02	17.94	0.33	11.85
LNGS148	S		0.54	6.42	61.03	18.03	0.34	11.99
LNGS149	S		0.09	6.63	63.49	17.95	0.38	11.99
LNGS150	S		0.13	6.53	61.6	17.19	0.34	12.43
LNGS151	S		0.09	6.55	62.3	16.95	0.39	12.34
LNGS152	S		0.07	6.67	63.41	17.9	0.34	12.08
LNGS153	S		0.09	6.63	63.23	17.1	0.37	12.08
LNGS154	S		1.11	6.66	60.91	18.55	0.37	11.59
LNGS155	S		0.08	6.8	64.24	17.56	0.36	11.57
LNGS156	S		0.17	6.77	64	15.97	0.32	12.29
LNGS157	S		0.08	6.81	63.38	17.21	0.36	11.96
LNGS158	S		0.54	6.84	62.81	18.1	0.36	11.8
LNGS159	S		0.07	6.88	63.38	17.57	0.31	12.17
LNGS160	S		0.08	6.95	64.21	17.58	0.37	12.1
LNGS161	S		0	6.83	63.26	17.44	0.34	11.72
LNGS162	S		0	7.01	64.39	15.42	0.37	13.45
LNGS163	S		0.09	6.85	63.21	15.41	0.31	12.6
LNGS164	S		0.09	6.95	63.59	17.6	0.34	11.95
LNGS165	S		0.57	6.93	61.35	17.52	0.35	12.28
LNGS166	S		0.09	7	62.7	17.55	0.3	12.01
LNGS167	S		0.08	7.12	62.92	17.64	0.28	12.07
LNGS168	S		0.04	7.04	63.53	15.51	0.31	12.16
LNGS169	S		0.08	7.12	62.06	17.82	0.33	12.03
LNGS170	S		0.2	7.32	64.95	16.08	0.34	12.59
LNGS171	S		0.05	7.33	65.46	15.65	0.34	12.59
LNGS172	S		0.08	7.28	63.51	17.5	0.35	11.83
LNGS173	S		0.44	7.09	58.43	19.39	0.38	11.7
LNGS174	S		0.09	7.32	63.37	17.44	0.31	11.93
LNGS175	S		0	7.34	61.61	15.27	0.37	13.16
LNGS176	S		0.41	7.8	57.51	19.33	0.36	11.01
LNGS177	S		0.58	8.36	59.91	17.35	0.35	12.21
LNGS178	S		0.23	8.64	61.21	16.73	0.37	12.28
LNGS179	S		0.46	8.72	56.78	24.98	0.4	10.1
LNGS180	S		0.7	8.65	60.01	16.77	0.35	12.34
LNGS181	S		0	8.91	63.65	16.84	0.35	12.08
LNGS182	S		0.25	9.12	60.72	17.32	0.37	12.26
LNGS183	S		0.1	9.12	60.35	15.32	0.34	13.05
LNGS184	S		0.19	9.27	58.61	17.96	0.33	12.26
LNGS185	S		0.09	9.73	63.74	15.26	0.34	12.72
LNGS186	S		0.02	9.91	62.57	15.44	0.33	12.96
LNGS187	S		0.14	10	62.95	15.03	0.29	13.13
LNGS188	S		0.32	10.03	57.28	21.02	0.32	12.3
LNGS189	S		0.18	9.97	59.34	17.14	0.34	12.97
LNGS190	S		0.3	9.87	55.69	20.58	0.31	12.34
LNGS191	S		0.07	10.15	62.49	15.54	0.3	12.73
LNGS192	S		0.55	11.66	55.92	17.91	0.34	12.75
LNGS193	S		0.03	11.87	60.05	14.21	0.3	13.74
LNGS194	S		0.06	11.9	59.83	15.51	0.34	12.98
LNGS195	S		0.45	11.98	55.53	18.8	0.32	12.3
LNGS196	S		0.19	13.32	53.24	19.68	0.29	13.11
LNGS197	S		0.19	13.85	53	19.63	0.29	13.35
LNGS198	S		0.19	14.07	54.22	15.77	0.31	13.83
LNGS199	S		0.22	14.51	56	15.66	0.29	14.26
LNGS200	S		0	14.32	56.57	14.36	0.28	13.86
LNGS201	S		0.11	14.8	56.29	15.02	0.32	12.88
LNGS202	S		0.08	14.81	55.46	16.47	0.3	12.25
LNGS203	S		0.81	15.37	54.98	15.87	0.29	14.27
LNGS204	S		0.23	15.68	55.93	15.49	0.27	13.96
LNGS205	S		0.06	15.78	55.25	15.06	0.27	14.4
LNGS206	S		0.22	15.31	52.91	16.88	0.36	12.18
LNGS207	S		0.06	15.83	54.2	14.79	0.29	13.8
LNGS208	S		0.09	16.48	53.42	18.35	0.35	11.76
LNGS209	S		0.23	16.82	52.71	15.27	0.23	14.21
LNGS210	S		0.3	16.79	50.53	22.16	0.38	11.28
LNGS211	S		0.01	17.13	53.01	14.53	0.32	13.66
LNGS212	S		0.02	17.99	52.2	16.43	0.35	12.75
LNGS213	S		0.25	17.79	47.44	20.86	0.32	11.73
LNGS214	S		0.03	18.44	53.5	17.68	0.33	11.82
LNGS215	S		0.06	17.81	49.72	20.25	0.3	10.66
LNGS216	S		0.06	18.76	51.5	17.34	0.29	12.41
LNGS217	S		0.55	20.02	44.59	17.66	0.25	15.68
LNGS218	S		0.39	21.42	45.13	17.47	0.29	15.75
LNGS219	S		0.08	20.93	48.51	16.49	0.32	13.32
LNGS220	S		0.09	21.66	48.81	17.54	0.33	12.84
LNGS221	S		0.07	21.73	47.32	16.97	0.28	12.49
LNGS222	S		0.09	21.75	46.47	16.88	0.33	13.06
LNGS223	S		0.31	22.18	46.06	16.76	0.31	13.42
LNGS224	S		0.18	23.54	47.97	11.84	0.28	15.68
LNGS225	S		0.49	24.37	45.68	13.74	0.22	16.19
LNGS226	S		0.09	24.05	47.67	16.55	0.3	12.81
LNGS227	S		0.08	25.73	44.36	17.56	0.27	12.85
LNGS228	S		0.07	25.56	44.17	16.84	0.28	12.42
LNGS229	S		0.04	26.86	42.87	12.63	0.24	16.75
LNGS230	S		0.03	26.69	42.49	18.34	0.29	12.14
LNGS231	S		0.34	27.41	42.15	14.28	0.28	14.95
LNGS232	S		0.23	30.98	37.88	16.44	0.24	14.29
LNGS233	S		0.02	30.76	36.95	16.41	0.25	14.42
LNGS234	S		0.23	31.9	37.83	15.42	0.32	14.26
LNGS235	S		0	31.9	33.67	17.84	0.28	14.2
LNGS236	S		0	33.19	34.39	15.64	0.24	15.59
LNGS237	S		0	33.03	35.41	15.4	0.29	14.75
LNGS238	S		0	33.13	35.94	16.34	0.24	14.05
LNGS239	S		0	32.93	34.61	15.73	0.23	14.78
LNGS240	S		0	33.63	33.51	17.95	0.23	14.82
LNGS241	S		0	33.99	35.04	15.98	0.21	14.8
LNGS242	S		0	34.14	32.27	18.49	0.25	14.55
LNGS243	S		0	33.48	33.82	15.12	0.23	14.76
LNGS244	S		0	34.27	35.43	15.52	0.22	14.64
LNGS245	S		0	34.53	34.44	15.41	0.24	15.06
LNGS246	S		0.05	35.34	33.09	12.45	0.21	18.18
LNGS247	S		0.13	35.27	35.33	14.94	0.23	15.44
LNGS248	S		0	35.11	35.44	15.62	0.22	14.85
LNGS249	S		0.12	35.54	31.7	13.19	0.18	18.37
LNGS250	S		0	35.45	35.04	15.47	0.23	15.2
LNGS251	S		0	35.29	33.75	15.6	0.22	15.42
LNGS252	S		0	35.14	30.82	18.61	0.2	15.04
LNGS253	S		0	34.96	33.23	15.41	0.22	15.26
LNGS254	S		0	35.62	35.08	15.52	0.22	14.91
LNGS255	S		0	35.28	34.21	15.55	0.24	14.82
LNGS256	S		0.02	35.61	34.55	15.46	0.2	14.87
LNGS257	S		0	35.36	31.53	15.28	0.24	16.2
LNGS258	S		0	35.29	33.81	15.63	0.24	14.56
LNGS259	S		0	35.61	32.87	15.48	0.22	15.37
LNGS260	S		0	35.67	34.44	15.62	0.24	14.49
LNGS261	S		0.12	36.65	32.25	12.6	0.2	18.23
LNGS262	S		0	35.65	32.63	15.68	0.26	15.11
LNGS263	S		0.01	35.66	32.85	15.64	0.17	15.05
LNGS264	S		0	36.42	32.69	15.38	0.21	15.61
LNGS265	S		0.13	36.64	32.94	12.26	0.21	17.1
LNGS266	S		0.04	36.51	33.24	14.01	0.21	15.81
LNGS267	S		0.15	38.03	31.6	10.82	0.16	19.68
LNGS268	S		0	37.64	29.62	18.27	0.21	14.56
LNGS269	S		0	36.84	33.4	14.85	0.2	15.08
LNGS270	S		0	36.74	32.92	15.67	0.23	14.72
LNGS271	S		0.11	38.09	32.22	13.02	0.21	17.97
LNGS272	S		0.03	36.42	31.05	15.48	0.17	15.07
LNGS273	S		0	37	32.73	15.17	0.2	14.69
LNGS274	S		0	37.41	31.4	15.23	0.19	15.61
LNGS275	S		0	37.33	30.99	14.8	0.18	15.92
LNGS276	S		0	37.99	32.17	14.84	0.22	15.51
LNGS277	S		0	37.81	31.99	15.12	0.2	15.18
LNGS278	S		0	37.59	30.9	14.7	0.2	15.46
LNGS279	S		0	38.6	31.03	14.61	0.2	15.78
LNGS280	S		0	38.45	30.12	14.52	0.19	16.16
LNGS281	S		0.09	38.97	31.5	13.76	0.22	16.28
LNGS282	S		0	39.16	30.89	14.43	0.21	15.88
LNGS283	S		0.15	40.13	31.04	12.04	0.19	17.72
LNGS284	S		0	39.16	30.79	14.35	0.2	15.49
LNGS285	S		0.02	39.32	30.02	14.85	0.23	15.6
LNGS286	S		0	39.08	28.6	14.47	0.21	16.16
LNGS287	S		0	39.53	27.83	14.03	0.16	17.21
LNGS288	S		0	39.58	29.53	14.3	0.21	16.15
LNGS289	S		0	39.47	29.16	14.16	0.21	16.3
LNGS290	S		0.02	39.78	29.88	13.14	0.22	16.62
LNGS291	S		0	40.01	30.12	14.27	0.18	16.03
LNGS292	S		0	40.08	29.74	14.51	0.22	15.89
LNGS293	S		0	39.86	29.46	14.03	0.19	15.93
LNGS294	S		0	40.27	29.57	14.55	0.22	15.93
LNGS295	S		0	40.06	28.47	13.87	0.22	16.35
LNGS296	S		0.13	40.67	29.31	12.15	0.2	17.4
LNGS297	S		0.24	41.55	28.55	11.33	0.19	19.03
LNGS298	S		0	40.45	28.99	13.95	0.21	16.31
LNGS299	S		0	40.34	26.98	13.62	0.21	17.36
LNGS300	S		0	40.79	29.57	13.89	0.2	16.07
LNGS301	S		0	41.16	29.04	14.12	0.18	16.11
LNGS302	S		0	41.13	28.92	13.72	0.23	16.11
LNGS303	S		0.01	40.76	27.68	13.97	0.16	16.83
LNGS304	S		0	40.65	28.45	14.14	0.2	16.1
LNGS305	S		0	40.61	27.94	14.56	0.22	16.06
LNGS306	S		0	42.59	27.46	13.74	0.18	16.32
LNGS307	S		0	40.47	26.89	13.85	0.17	16.61
LNGS308	S		0.14	41.13	28.49	12.19	0.2	17.14
LNGS309	S		0	42.06	27.57	14.15	0.19	16.4
LNGS310	S		0	41.67	28.76	13.72	0.2	16.48
LNGS311	S		0	42.79	27.05	13.47	0.16	16.45
LNGS312	S		0	43.42	26.92	13.57	0.18	16.65
LNGS313	S		0.05	41.96	26.48	12.51	0.22	17.38
LNGS314	S		0.06	42.7	27.72	12.85	0.15	17.18
LNGS315	S		0.08	42.74	27.32	12.88	0.18	17.38
LNGS316	S		0.06	42.73	26.19	12.58	0.17	17.97
LNGS317	S		0.05	42.71	26.57	12.78	0.17	17.31
LNGS318	S		0.03	43.2	26.87	12.69	0.18	17.02
LNGS319	S		0.04	43.08	25.36	12.98	0.18	17.23
LNGS320	S		0.14	43.58	26.07	11.19	0.17	17.91
LNGS321	S		0.06	43.42	24.87	12.76	0.2	17.43
LNGS322	S		0.07	44.93	25.9	12.5	0.14	17.78
LNGS323	S		0.06	58.67	10.18	11.5	0.12	19.44
LNGS324	S		0.07	54.03	16.25	11.16	0.11	19.63
LNGS325	S		0.07	57.9	10.68	11.39	0.1	19.9
LNGS326	S		0.04	55.55	10.64	12.3	0.11	19.74
LNGS327	S		0.08	54.11	16.66	8.43	0.06	21.13
LNGS328	S		0.71	4.82	63.14	19.42	0.3	10.21
LNGS329	S		0.31	4.95	63.98	18.99	0.27	10.89
LNGS330	S		0.03	4.96	66.16	17.68	0.31	10.63
LNGS331	S		0.02	5.05	65.57	17.71	0.3	11.28
LNGS332	S		0.33	5.07	64.23	17.26	0.27	11.23
LNGS333	S		0.03	5.19	64.12	18.06	0.28	11.4
LNGS334	S		0.93	5.22	60.48	22.17	0.23	11.02
LNGS335	S		0.31	5.25	64.52	18.78	0.28	10.49
LNGS336	S		0.3	5.33	64.9	19.19	0.27	10.88
LNGS337	S		0.6	5.4	61.72	18.2	0.29	10.46
LNGS338	S		0.14	5.44	61.78	19.32	0.29	11.51
LNGS339	S		0.67	5.45	65.05	18.02	0.27	11.17
LNGS340	S		0.11	5.46	62.86	19.65	0.26	11.36
LNGS341	S		0.25	5.46	63.45	20.5	0.28	10.42
LNGS342	S		0.12	5.57	60.84	20.32	0.25	11.41
LNGS343	S		0.13	5.58	62.96	17.1	0.26	11.44
LNGS344	S		0.04	5.82	62.68	19.12	0.24	10.88
LNGS345	S		0.59	5.82	63.83	19.25	0.28	10.27
LNGS346	S		0.12	5.93	63.14	17.71	0.28	11.5
LNGS347	S		0.11	5.98	63.91	18.61	0.27	10.1
LNGS348	S		0.13	5.99	60.72	20.05	0.27	11.5
LNGS349	S		0.1	6	63.63	19.23	0.26	11.36
LNGS350	S		0.12	6.01	62.49	18.92	0.28	11.43
LNGS351	S		0.11	6.09	64.8	18.72	0.26	9.9
LNGS352	S		0.01	6.21	65.63	16.95	0.27	10.39
LNGS353	S		0.26	6.21	60.23	23.08	0.27	9.13
LNGS354	S		0.68	6.25	62.77	20.85	0.29	10.32
LNGS355	S		0.03	6.26	63.5	18.93	0.27	10.74
LNGS356	S		0.43	6.28	61.95	18.9	0.29	11.46
LNGS357	S		0.11	6.34	64.63	17.83	0.28	10.41
LNGS358	S		0.08	6.55	65.58	15.52	0.23	11.25
LNGS359	S		1.15	6.61	61.41	18.58	0.24	11.21
LNGS360	S		0.05	6.62	65.53	16.92	0.29	10.88
LNGS361	S		0.06	6.72	65.82	16.21	0.31	11.19
LNGS362	S		0.02	7.03	63.98	16.76	0.3	11.55
LNGS363	S		0.41	7.28	62.25	18.28	0.25	11.09
LNGS364	S		0.81	7.82	61.59	17.29	0.27	12.07
LNGS365	S		0.47	8.12	60.27	17.33	0.27	12.36
LNGS366	S		0.02	8.35	62.98	16.7	0.27	10.67
LNGS367	S		0.3	8.43	63.37	15.45	0.25	11.65
LNGS368	S		0.1	8.58	61.02	17.85	0.3	10.78
LNGS369	S		0.1	9.51	60.29	15.84	0.26	12.01
LNGS370	S		0.33	9.65	59.5	19.52	0.25	10.75
LNGS371	S		0.2	10.16	60.58	16.18	0.23	11.09
LNGS372	S		0.28	10.93	58.2	18.56	0.24	10.98
LNGS373	S		0.14	13.16	54.08	18.5	0.25	11.46
LNGS374	S		0.16	14.72	55.4	18.02	0.23	11.47
LNGS375	S		0.31	14.76	54.36	16.13	0.27	11.71
LNGS376	S		0.27	15.08	53.49	17.59	0.21	12.11
LNGS377	S		0.45	15.58	51.5	16.32	0.21	13.63
LNGS378	S		0.46	15.78	53.27	16.45	0.2	13.18
LNGS379	S		0.29	16.07	53.31	16.9	0.25	11.88
LNGS380	S		1.11	16.44	47.93	21.58	0.23	12.25
LNGS381	S		0.13	16.86	49.78	22.12	0.23	11.02
LNGS382	S		0.3	17.21	52.57	17.17	0.27	11.27
LNGS383	S		0.21	17.39	51.76	14.56	0.27	12.6
LNGS384	S		0.05	20.98	43.49	19.16	0.22	13.11
LNGS385	S		0.15	24.86	44.26	13.41	0.19	14.73
LNGS386	S		0.11	28.78	40.95	16.92	0.2	12.76
LNGS387	S		0.11	28.78	41.15	17.01	0.2	12.76
LNGS388	S		0.04	30.3	36.7	17.64	0.2	13.87
LNGS389	S		0.02	31.44	33.44	18.34	0.18	14.45
LNGS390	S		0.02	32.1	33.83	18.96	0.19	14.08
LNGS391	S		0.03	32.66	35.03	19.27	0.19	12.49
LNGS392	S		0.04	32.99	34.82	16.56	0.19	13.8
LNGS393	S		0.05	33.04	34.27	16.07	0.22	13.94
LNGS394	S		0.02	33.16	34.8	16.02	0.2	13.88
LNGS395	S		0.02	33.3	32.84	17.56	0.2	14.11
LNGS396	S		0.04	33.61	33.98	17.61	0.2	12.92
LNGS397	S		0.02	33.71	32.43	17.44	0.2	14.33
LNGS398	S		0.03	33.77	34.03	16.84	0.21	13.18
LNGS399	S		0.04	33.87	34.22	15.91	0.21	14.04
LNGS400	S		0.02	33.97	34.13	16.51	0.21	14.03
LNGS401	S		0.02	33.98	34.37	16.17	0.21	13.75
LNGS402	S		0.02	34.75	33.61	17.61	0.19	14.36
LNGS403	S		0.03	34.89	32.44	16.32	0.18	14.2
LNGS404	S		0.01	35.26	30.57	16.55	0.17	14.92
LNGS405	S		0.02	35.61	30.89	14.31	0.18	14.71
LNGS406	S		0.03	35.69	32.07	15.16	0.19	14.3
LNGS407	S		0.01	35.72	32.72	16.08	0.21	13.68
LNGS408	S		0.01	36.8	27.51	15.61	0.14	15.7
LNGS409	S		0	37	31.45	16.19	0.15	13.81
LNGS410	S		0.54	37.01	30.29	12.66	0.15	17.46
LNGS411	S		0.53	37.21	29.84	12.82	0.16	17.92
LNGS412	S		0.05	37.25	31.93	17.13	0.16	13.55
LNGS413	S		0.04	37.26	30.31	15.41	0.17	14.08
LNGS414	S		0.01	37.95	28.19	16.04	0.14	15.17
LNGS415	S		0	38.39	29.6	14.11	0.17	15.31
LNGS416	S		0.01	38.56	27.6	16.09	0.16	15.45
LNGS417	S		0.01	39.66	28.64	14.61	0.17	15.26
LNGS418	S		0.02	39.75	25.32	15.04	0.16	16.37
LNGS419	S		0.01	40.08	28.14	15.03	0.17	14.8
LNGS420	S		0.01	40.13	27.93	14.91	0.16	15.96
LNGS421	S		0	40.29	28.31	15.79	0.13	14.53
LNGS422	S		0	40.38	27.09	16.1	0.15	15.59
LNGS423	S		0.09	40.74	25.71	14.11	0.15	16.68
LNGS424	S		0.07	42.16	25.72	14.06	0.11	16.87
LNGS425	S		1.81	5.64	56.51	23.95	0.35	10.58
LNGS426	S		1.62	5.86	59.37	24.24	0.37	10.36
LNGS427	S		2.18	5.87	56.19	21.97	0.32	11.77
LNGS428	S		2.64	6.22	57.82	22.35	0.41	11.41
LNGS429	S		2.09	6.32	57.66	23.55	0.35	10.89
LNGS430	S		2.02	6.89	58.04	19.9	0.34	12.29
LNGS431	S		2.65	7.14	59.22	17.51	0.24	12.4
LNGS432	S		1.86	7.95	56.76	19.32	0.37	12.9
LNGS433	S		2.26	7.95	53.5	20.74	0.33	12.25
LNGS434	S		2.77	8.2	51.85	24.03	0.37	11.84
LNGS435	S		2.36	8.29	57.06	21.01	0.25	11.4
LNGS436	S		2.39	8.78	54.36	21.45	0.33	12.45
LNGS437	S		2.59	8.82	53.54	20.63	0.26	12.28
LNGS438	S		2.31	9.24	56.23	19.43	0.34	13.83
LNGS439	S		2.12	9.16	53.33	20.46	0.33	12.57
LNGS440	S		2.35	9.29	53.86	19.55	0.35	13.14
LNGS441	S		2.05	9.65	56	20.25	0.35	12.76
LNGS442	S		2.47	9.69	53.51	20.88	0.38	13.18
LNGS443	S		2.56	11.71	52.23	20.54	0.32	13.18
LNGS444	S		2.83	11.98	50.65	21.34	0.36	13.23
LNGS445	S		2.56	4.52	58.62	21.23	0.26	10.44
LNGS446	S		3.24	5.44	52.05	27.58	0.3	11.72
LNGS447	S		3.25	5.25	56.45	23.7	0.32	11.66
LNGS448	S		3.28	5.34	56.5	22.33	0.3	10.86
LNGS449	S		3.35	5.34	54.93	23.68	0.32	11.96
LNGS450	S		3.36	5.94	55.41	22.43	0.37	11.86
LNGS451	S		3.78	5.13	54.87	24.12	0.25	12.39
LNGS452	S		1.6	12.07	50.35	25.13	0.33	10.45
LNGS453	S		1.75	13.8	50.82	21.44	0.35	12.28
LNGS454	S		1.72	15.09	47.86	20.84	0.29	13.42
LNGS455	S		3.08	21.9	33.11	24.9	0.4	15.38
LNGS456	S		0.4	6.14	58.65	21.89	0.29	11.45
LNGS457	S		0.36	8.21	56.17	22.22	0.24	10.78
LNGS458	S		1.85	6.99	56.8	20.82	0.4	11.36
LNGS459	S		1.89	7.4	57.13	19.91	0.38	12.18
LNGS460	S		2.34	7.58	54.69	20.16	0.39	12.15
LNGS461	S		2.83	7.83	53.94	23.32	0.45	11.3
LNGS462	S		2.53	8.3	53.88	20.34	0.43	11.72
LNGS463	S		2.24	9.06	54.81	20.99	0.37	11.75
LNGS464	S		2.36	9.14	54.32	19.48	0.34	13.22
LNGS465	S		0.95	1.28	59.36	27.66	0.46	8.51
LNGS466	S		0.98	2.05	63.14	25.51	0.32	8
LNGS467	S		1	1.73	58.74	30.4	0.4	7.24
LNGS468	S		0.37	1.32	58.13	32.34	0.55	5.78
LNGS469	S		0.42	1.39	58.36	31.99	0.55	5.8
LNGS470	S		1.51	1.66	52.13	39.48	0.52	5.23
LNGS471	S		2.67	0.79	40.55	50.43	0.56	4.28
LNGS472	S		2.7	0.12	40.17	54.23	0.45	3.93
LNGS473	S		2.87	0.28	38	54.54	0.42	4.15
LNGS474	S		2.77	0.29	44.67	47.7	0.5	3.91
LNGS475	S		3.08	0.32	42.21	50.81	0.46	3.86
LNGS478	S		0.65	1.32	54.51	35.45	0.66	5.98
LNGS479	S		0.33	1.46	60.37	30.37	0.55	5.48
LNGS480	S		1.14	1.89	54.1	35.09	0.63	5.98
LNGS481	S		1.73	0.7	52.68	39.61	0.71	4.67
LNGS482	S		2.29	0.33	49.69	40.09	0.7	4.48
LNGS483	S		1.81	0.68	52.73	39.54	0.67	4.74
LNGS484	S		4.37	11.43	42.82	25.87	0.42	15.46
LNGS485	S		4.88	7.89	44.77	26.62	0.43	14.03
LNGS486	S		4.33	5.47	51.76	25.42	0.32	11.95
LNGS487	S		4.28	5.86	50.85	25.05	0.34	11.63
LNGS488	S		4.7	6.25	50.42	25.09	0.3	12.05
LNGS489	S		4.53	5.87	52.76	26.2	0.38	11.62
LNGS490	S		4.34	6.24	51.84	26.68	0.32	11.56
LNGS491	S		4.24	6.46	51.5	25.95	0.31	11.29
LNGS492	S		4.35	6.4	52.27	26.13	0.35	11.41
LNGS493	S		4.03	10.48	47.7	26.16	0.41	12.53
LNGS494	S		4.41	7.07	51.94	25.94	0.33	11.53
LNGS495	S		4.38	6.51	52.04	26.17	0.32	11.18
LNGS496	S		6.18	4.61	45.46	32.58	0.45	11.33
LNGS497	S		7.31	3.74	42.41	36.13	0.61	9.98
LNGS498	S		9.13	3.89	33.01	41.11	0.63	11.36
LNGS499	S		5.95	10.61	32.86	30.74	0.61	9.52
LNGS500	S		9.17	7.32	25.69	39.69	0.99	12.08
LNGS501	S		10.08	2.2	35.58	41.19	0.56	10.12
LNGS502	S		11.77	2.11	28.38	47.01	0.59	10.32
LNGS503	S		0.51	3.52	57.56	30.03	0.46	6.54
LNGS504	S		0.94	4.29	54.92	27.78	0.36	9.83
LNGS505	S		3.24	4.3	46.59	37.05	0.38	7.91
LNGS506	S		1.05	4.39	55.62	29.63	0.45	8.48
LNGS507	S		4.76	5.78	48.1	27.96	0.26	11.98
LNGS508	S		3.65	6.72	53.12	25.55	0.31	11.24
LNGS509	S		4.8	5.02	52.55	27.32	0.26	10.62
LNGS510	S		4.43	6.21	52.35	26.47	0.25	10.7
LNGS511	S		4.63	4.68	51.38	27.01	0.23	10.13
LNGS512	S		4.92	5.44	50.69	26.32	0.24	10.73
LNGS513	S		4.44	6.32	52.44	25.78	0.26	10.51
LNGS514	S		4.55	15.4	31.78	35.73	1.52	10.92
LNGS515	S		5.02	5.98	48.52	29.31	0.44	9.29
LNGS516	S		0.2	3.36	60.26	30.36	0.5	6.69
LNGS517	S		0.39	4.19	59.17	29.03	0.53	6
LNGS518	S		6.16	3.17	44.61	32.59	0.49	10.47
LNGS519	S		6.39	3.46	44.56	32.71	0.5	9.42
LNGS520	S		11.45	2.37	30.46	41.92	0.58	9.48
LenD5-117	S		0.001	39.42	28.51	13.96	0.14	16.23
LenD5-118	S		0	39.51	28.41	13.84	0.132	16.27
LenD5-119	S		6.525	3.36	38.75	34.15	0.538	11.79
LenD5-123	S	0.01	0.05	5.4	57.33	30.67	0.36	6.72	0.05	0.03	0
LenD5-131	S		0.012	36.47	34.4	13.92	0.169	16.17
LenD5-135	S		0.001	36.4	31.95	14.95	0.175	15.04
LenD5-136	S		0.097	0.13	0.13	6.73	0.025	24.29
LenD5-137	S		0.018	28.04	40.21	16.83	0.209	13.42
LenD5-140	S		0.078	38.75	28.75	13.1	0.125	16.86
LenD5-141	S		0.075	38.28	28.66	12.88	0.133	16.29
LenD5-142	S		0.071	38.89	28.88	12.98	0.125	16.34
LenD5-147	S		0	37.4	29.76	14.34	0.141	15.84
LenD5-148	S		0	33.8	34.38	15.55	0.16	14.49
LenD5-154	S		0.018	33.25	34.44	15.58	0.173	14.82
LenD1-58	S		4.36	15.36	42.04	24.62	0.18	12.88
LenD1-62	S		0.04	69.11	0.03	2.37	0.01	28.09

## Sheet: LenEnstatite
		Table 1-2. Microprobe analyses of orthopyroxenes from Leningrad pipe (wt.%)
		SiO2	TiO2	Al2O3	Cr2O3	FeO	MnO	MgO	CaO	Na2O			Total
sv18-2	E	58.36	0.01	0.39	0.21	4.93	0.11	35.94	0.21	0.07			100.23
sv18-3	E	58.12	0	1.06	0.39	4.7	0.1	35.5	0.33	0.08			100.28
sv18-4	E	57.89	0.01	1.15	0.37	4.77	0.1	35.43	0.31	0.06			100.09
sv18-5	E	57.88	0.01	1.12	0.4	4.84	0.11	35.38	0.31	0.09			100.14
sv18-6	E	57.73	0.02	1.15	0.38	4.83	0.09	35.31	0.32	0.11			99.94
sv18-7	E	57.71	0	1.1	0.37	4.91	0.11	35.33	0.27	0.08			99.88
sv18-9	E	57.57	0.01	1.43	0.39	5.01	0.12	34.91	0.36	0.06			99.86
sv18-10	E	57.51	0.02	1.41	0.38	4.93	0.1	35.16	0.34	0.09			99.94
SV-12	E	50.33	0.03	9.67	0.14	10.94	0.17	27.65	0.54	0.05			99.52

## Sheet: LenGarnet
		Table 1-2. Microprobe analyses of orthoroxenes from Leningrad pipe (wt.%)
		SiO2	TiO2	Al2O3	Cr2O3	FeO	MnO	MgO	CaO	Na2O			Total
"Lng01	G	41.03	0.41	13.93	11.61	6.98	0.36	19.23	5.66	0.07			99.28
"Lng02	G	41.92	0.78	21.8	0.14	9.34	0.33	19.47	5.36	0.07			99.21
"Lng03	G	41.66	0.87	20.74	3.68	8.16	0.31	20.18	4.75	0.08			100.43
"Lng04	G	41.43	1.06	18.87	2.93	10.04	0.35	19.44	4.91	0.1			99.13
"Lng06	G	40.09	0.58	14.48	10.41	7.42	0.41	20.67	4.97	0.08			99.11
"Lng07	G	39.79	0.34	16.01	7.05	10.24	0.66	16.48	10.35	0.05			100.97
"Lng08	G	40.33	0.42	13.44	12.05	7.2	0.42	19.36	5.92	0.06			99.2
"Lng09	G	40.38	0.62	14.46	10.51	7.46	0.45	20.2	5.21	0.08			99.37
"Lng10	G	41.48	1.11	16.39	6.26	8.2	0.31	20.57	5.41	0.1			99.83
"Lng11	G	40.56	1.22	14.1	9.72	7.13	0.34	18.02	7.93	0.11			99.13
"Lng110	G	41.62	0.11	20.22	3.81	9.25	0.54	19.45	4.39	0.07			99.46
"Lng110	G	41.05	0.32	18.27	6.25	8.1	0.5	19.78	5.05	0.09			99.41
"Lng110	G	41.31	1.11	15.82	7.21	7.15	0.29	20.68	5.42	0.09			99.08
"Lng110	G	40.45	0.06	17.62	6.8	8.63	0.52	19.36	5.9	0.03			99.37
"Lng110	G	41.26	0.94	17.44	5.63	7.62	0.37	19.9	6	0.09			99.25
"Lng111	G	39.87	0.04	22.5	0.02	20.25	0.14	15.75	1.3	0.02			99.89
"Lng111	G	41.41	0.03	19.81	5.29	7.72	0.43	21.61	2.67	0.03			99
"Lng111	G	42.95	0.92	20.74	0.95	9.59	0.24	20.39	4.16	0.1			100.04
"Lng111	G	42.65	0.82	19.76	2.63	8.56	0.29	20.68	4.5	0.07			99.96
"Lng111	G	41.29	1.01	21.23	1.22	11.08	0.39	19.37	4.51	0.07			100.17
"Lng111	G	38.69	0.06	21.35	0	26.38	0.6	8.76	4.69	0.03			100.56
"Lng111	G	42.3	0.16	19.97	4.62	8.4	0.48	19.39	5.18	0.04			100.54
"Lng111	G	41.55	0.18	19.14	5.16	7.96	0.48	19.48	5.19	0.04			99.18
"Lng111	G	42.16	0.2	19.55	5.28	8.11	0.45	19.2	5.24	0.04			100.23
"Lng111	G	41.33	1	16.08	7.09	8.27	0.34	19.43	5.62	0.08			99.24
"Lng112	G	43.16	0.89	21.39	0.42	8.69	0.24	21.28	4.17	0.08			100.32
"Lng112	G	42.57	0.84	19.87	2.17	8.59	0.29	20.89	4.41	0.07			99.7
"Lng112	G	41.93	0.95	20.73	1.29	11.03	0.38	19.47	4.42	0.09			100.29
"Lng112	G	42.65	0.84	19.69	2.59	8.51	0.27	20.64	4.49	0.07			99.75
"Lng112	G	41.17	0.94	19.76	2.05	9.98	0.31	20.47	4.51	0.08			99.27
"Lng112	G	41.83	0.19	19.39	5.2	8.32	0.47	19.25	5.17	0.04			99.86
"Lng112	G	41.68	0.18	19.51	5.12	8.23	0.48	19.38	5.2	0.03			99.81
"Lng112	G	42.92	0	20.72	4.05	7.92	0.43	19.37	5.27	0.02			100.7
"Lng112	G	39.37	0.09	21.61	0	23.66	0.48	10.08	5.56	0.05			100.9
"Lng113	G	42.7	0.88	21.52	0.14	8.96	0.26	21.08	4.16	0.08			99.78
"Lng113	G	42.49	1.11	19.57	2.2	8.89	0.28	20.75	4.47	0.07			99.83
"Lng113	G	42.59	0.85	19.88	2.57	8.46	0.29	20.6	4.56	0.09			99.89
"Lng113	G	41.8	0.98	19.39	2.55	10.17	0.36	19.68	4.7	0.07			99.7
"Lng113	G	38.98	0.08	20.9	0.01	26.99	0.86	6.87	5.25	0.06			100
"Lng113	G	41.73	0.98	16.99	6.41	8.3	0.38	19.5	5.33	0.09			99.71
"Lng113	G	41.65	0.7	18.21	5.75	7.19	0.33	20.21	5.41	0.09			99.54
"Lng113	G	40.59	0.2	18.69	6.45	8.25	0.49	18.98	5.43	0.05			99.13
"Lng113	G	42.68	0.44	17.21	6.39	7.48	0.36	19.88	5.54	0.03			100.01
"Lng113	G	41.22	1.27	15.91	6.6	9.41	0.38	18.95	5.84	0.08			99.66
"Lng114	G	42.26	0.94	20.07	1.69	9.71	0.35	20.19	4.48	0.07			99.76
"Lng114	G	41.82	0.32	19.21	5.35	8.62	0.47	19.62	4.54	0.08			100.03
"Lng114	G	41.81	0.89	19.96	2.41	9.14	0.29	20.23	4.57	0.08			99.38
"Lng114	G	41.88	0.99	19.43	2.44	10.1	0.36	19.83	4.69	0.09			99.81
"Lng114	G	42.47	0.1	20.84	3.61	8.74	0.45	19.74	4.74	0.04			100.73
"Lng114	G	38.77	0.05	21.23	0.06	27.23	0.62	7.18	4.79	0.02			99.95
"Lng114	G	41.9	0.31	19.98	4.07	9.1	0.49	18.93	5	0.07			99.85
"Lng114	G	42.62	0.75	18.53	5.03	7.44	0.38	20.26	5.05	0.08			100.14
"Lng114	G	41.6	0.14	19.3	5.15	8.37	0.48	19.17	5.18	0.05			99.44
"Lng114	G	41.05	1.17	14.48	8.91	7.14	0.36	18.74	7.42	0.12			99.39
"Lng115	G	42.02	0.86	20.85	1.19	11	0.37	19.55	4.33	0.07			100.24
"Lng115	G	41.08	0.92	19.74	2.19	9.78	0.31	20.7	4.49	0.07			99.28
"Lng115	G	40.64	0.2	19.78	5.05	8.23	0.51	19.55	5.11	0.04			99.11
"Lng115	G	40.83	0.17	16.82	7.87	6.92	0.32	21.01	5.2	0.05			99.19
"Lng115	G	39.62	0.08	21.66	0.1	24.01	0.54	9.58	5.24	0.04			100.87
"Lng115	G	42.59	0.67	18.29	5.76	7.19	0.4	20.11	5.25	0.07			100.33
"Lng115	G	40.82	0.14	17.79	7.41	7.99	0.52	19.14	5.52	0.06			99.39
"Lng115	G	41.28	0.06	18.01	6.71	8.67	0.5	18.22	5.75	0.04			99.24
"Lng115	G	41.87	0.01	18.13	6.86	8.21	0.47	18.19	6.19	0.03			99.96
"Lng116	G	41.7	0.79	21.16	1.62	8.13	0.28	21.46	4.25	0.06			99.45
"Lng116	G	42.3	0.86	19.57	2.94	8.41	0.26	20.81	4.45	0.07			99.67
"Lng116	G	42.93	0.85	19.69	2.46	8.39	0.26	20.87	4.47	0.07			99.99
"Lng116	G	42.38	0.96	19.64	2.46	9.65	0.3	19.98	4.54	0.09			100
"Lng116	G	42.19	0.95	19.38	2.56	9.63	0.31	19.68	4.62	0.07			99.39
"Lng116	G	42.35	0.98	19.36	2.51	9.97	0.35	19.7	4.73	0.07			100.02
"Lng116	G	41.81	0.94	18.4	3.87	9.91	0.31	19.42	4.97	0.08			99.71
"Lng116	G	41.57	0.96	18.37	3.85	9.7	0.35	19.35	5	0.07			99.22
"Lng116	G	42.24	0.46	17.27	6.46	7.5	0.33	19.66	5.47	0.05			99.44
"Lng117	G	42.46	0.11	21.4	2.65	8.52	0.44	19.77	4.47	0.04			99.86
"Lng117	G	42.62	1	19.33	2.64	9.54	0.36	19.84	4.72	0.07			100.12
"Lng117	G	40.9	0.74	17.83	5.33	7.85	0.29	21.35	4.91	0.07			99.27
"Lng117	G	41.55	0.76	18	5.37	7.93	0.36	20.06	4.97	0.07			99.07
"Lng117	G	42.59	0.83	17.67	5.19	7.83	0.41	20.15	5.19	0.08			99.94
"Lng117	G	41.33	1.24	18.1	5.13	9.1	0.33	19.84	5.23	0.22			100.52
"Lng117	G	39.73	0.04	21.47	0.02	24.85	0.48	8.67	5.38	0.02			100.66
"Lng117	G	41.06	0.08	18.13	6.57	8.53	0.54	18.61	5.75	0.04			99.31
"Lng117	G	40.99	0.08	17.82	6.94	8.48	0.51	18.59	5.86	0.04			99.31
"Lng117	G	39.42	0.12	21.15	0	25.45	0.38	7.55	6.68	0.05			100.8
"Lng118	G	41.13	0.58	14.86	10.54	7.51	0.46	19.64	4.97	0.1			99.79
"Lng118	G	42.28	0.18	19.99	4.8	8.33	0.51	19.25	5.33	0.04			100.71
"Lng118	G	42.24	0.99	16.17	6.47	7.57	0.27	21.28	5.46	0.07			100.52
"Lng118	G	41.63	0.32	19.25	5.17	8.64	0.51	19.15	5.54	0.07			100.28
"Lng118	G	40.94	0.96	15.88	7.12	8.12	0.31	20.38	5.6	0.08			99.39
"Lng118	G	40.88	0.27	17.19	7.92	8.15	0.51	18.45	6	0.06			99.43
"Lng118	G	41.63	1.18	14.06	9.8	7.48	0.33	19.35	6.88	0.07			100.78
"Lng119	G	42.3	0.97	20.94	0.99	10.23	0.39	19.86	4.53	0.07			100.28
"Lng119	G	42.44	0.83	19.91	2.45	8.3	0.29	20.76	4.62	0.07			99.67
"Lng119	G	41.78	1.07	17.44	4.85	8.62	0.3	20.55	4.96	0.09			99.66
"Lng119	G	41.46	0.55	14.52	10.69	7.13	0.39	20.23	5.2	0.09			100.26
"Lng119	G	39.05	0.06	21.47	0.08	25.48	0.79	8.55	5.25	0.05			100.78
"Lng12	G	42.33	2.14	20.53	0.2	9.81	0.31	20.33	4.7	0.11			100.46
"Lng13	G	42.09	0.85	19.75	2.82	9.75	0.34	19.39	4.91	0.08			99.98
"Lng14	G	39.11	0.07	21.59	0.11	23.98	0.78	8.63	5.41	0.04			99.72
"Lng15	G	40.74	1.12	21.1	3.06	10.14	0.38	19.25	5.1	0.1			100.99
"Lng16	G	42	0.16	20.03	4.44	8.95	0.55	19.23	4.66	0.06			100.08
"Lng17	G	42.61	0.88	21.44	0.1	8.79	0.3	19.18	6.51	0.07			99.88
"Lng18	G	42.5	0.03	19.74	5.38	7.78	0.45	21.17	2.88	0.03			99.96
"Lng19	G	40.91	0.89	15.47	8.12	7.36	0.32	19.89	6.01	0.09			99.06
"Lng1Ln	G	39.97	1.22	12.05	11.66	8.3	0.38	19.83	7.43	0.1			100.94
"Lng20	G	38.96	0.02	20.95	0.01	28.87	0.55	6.17	5.2	0.03			100.76
"Lng22	G	41.39	1.04	19.36	2.54	10.03	0.34	19.84	4.82	0.07			99.43
"Lng23	G	42.08	0.03	19.32	5.51	7.53	0.42	21.47	2.89	0.03			99.28
"Lng24	G	42.63	0.17	20.88	3.88	8.84	0.51	19.25	4.71	0.04			100.91
"Lng25	G	38.94	0.09	21.17	0.02	26.13	1.11	6.5	6.11	0.03			100.1
"Lng26	G	41.19	0.23	17.37	7.73	8.41	0.52	17.89	6.19	0.05			99.58
"Lng27	G	41.51	0.51	17.03	7.57	7.21	0.39	19.9	5.38	0.08			99.58
"Lng28	G	38.64	0.07	20.4	0.08	27.51	1.12	6.65	6.01	0.02			100.5	19.9
"Lng29	G	39.58	0.04	21.49	0.11	23.08	0.57	9.44	5.41	0.04			99.76
"Lng30	G	42.28	0.93	19.67	2.22	9.83	0.33	19.88	4.7	0.09			99.93
"Lng31	G	42.29	0.89	19.22	3.12	8.53	0.29	20.63	4.65	0.06			99.68
"Lng32	G	42.33	2.09	20.5	0.25	9.66	0.31	20.42	4.76	0.08			100.4
"Lng33	G	41.07	1.36	15.69	7.3	8.51	0.41	19.04	5.95	0.1			99.43
"Lng34	G	41.54	1.14	18.78	3.11	10.41	0.38	19.16	5.13	0.09			99.74
"Lng35	G	41.68	1.06	19.17	2.71	10.06	0.36	19.69	4.91	0.09			99.73
"Lng36	G	41.46	1.11	16.29	7.72	7.38	0.41	19.38	6.11	0.09			99.95
"Lng39	G	41.3	0.32	19.13	5	8.69	0.49	19.15	5.18	0.07			99.33
"Lng41	G	42.29	1	19.82	2.26	10.15	0.33	20.1	4.77	0.07			100.79
"Lng42	G	42.38	0.9	19.94	2.48	8.26	0.27	21.15	4.54	0.09			100.01
"Lng43	G	41.38	0.79	20.77	0.44	12.25	0.55	14.59	9.08	0.11			99.96
"Lng44	G	40.73	1.32	15.02	7.61	10.24	0.36	18.16	6.52	0.11			100.07
"Lng45	G	40.92	1.21	16.29	6.12	9.96	0.34	18.75	5.82	0.09			99.5
"Lng46	G	41.98	0.86	19.87	2.56	9.54	0.32	19.75	4.9	0.07			99.85
"Lng47	G	42.03	0.97	19.44	2.37	10.04	0.34	19.95	4.79	0.07			100
"Lng48	G	41.78	0.94	19.52	2.21	9.97	0.36	20.1	4.71	0.08			99.67
"Lng49	G	42	0.91	20.79	0.57	9.09	0.25	20.66	4.71	0.09			99.07
"Lng50	G	41.54	0.32	19.54	4.87	8.15	0.44	19.89	5.21	0.07			100.03
"Lng51	G	41.24	0.92	17.53	5.38	7.89	0.27	20.76	5.14	0.05			99.18
"Lng52	G	42.05	0.52	19.76	3.22	7.86	0.3	20.93	4.71	0.05			99.4
"Lng53	G	42.15	0.95	19.8	2.23	9.98	0.31	19.77	4.68	0.09			99.96
"Lng54	G	41.34	1.17	17.13	5.35	7.99	0.27	20.68	5.08	0.1			99.11
"Lng55	G	42.24	0.79	21.12	0.56	8.83	0.23	21.23	4.25	0.07			99.32
"Lng56	G	41.35	0.35	18.51	6	8.43	0.48	18.71	5.71	0.06			99.6
"Lng57	G	39.1	0.04	21.13	0.02	26.52	0.79	7.44	5.78	0.05			100.87
"Lng58	G	42.14	0.99	19.48	2.48	9.82	0.35	19.81	4.74	0.07			99.88
"Lng59	G	42.44	0.85	19.98	2.39	8.43	0.28	20.83	4.55	0.07			99.82
"Lng60	G	39.44	0.06	21.54	0.04	24.88	0.41	8.88	5.56	0.04			100.85
"Lng61	G	41.2	1.31	12.76	10.63	8.22	0.35	17.74	7.27	0.1			99.58
"Lng62	G	42.29	1.01	19.47	2.57	9.88	0.34	19.38	4.85	0.09			99.88
"Lng63	G	40.51	1.16	14.32	9.6	7.14	0.33	18.36	7.84	0.1			99.36
"Lng64	G	41.98	1.01	19.28	2.97	10.05	0.34	19.51	4.88	0.09			100.11
"Lng65	G	41.33	0.33	19.82	4.13	8.96	0.53	18.98	5.07	0.05			99.2
"Lng66	G	41.71	0.23	18.54	6.36	8.21	0.49	19.06	5.44	0.08			100.12
"Lng67	G	41.77	0.13	21.08	2.84	8.61	0.48	19.68	4.7	0.03			99.32
"Lng68	G	41.13	0.13	17.61	7.26	8.46	0.54	18.48	6.1	0.06			99.77
"Lng69	G	39.44	0.07	21.71	0.01	24.39	0.62	9.27	5.42	0.03			100.96
"Lng70	G	41.11	0.12	17.64	7.35	8.43	0.58	18.22	6.04	0.05			99.54
"Lng71	G	40.83	0.08	17.62	7.4	8.64	0.52	17.82	6.13	0.03			99.07
"Lng72	G	40.78	0.37	17.62	7.01	8.4	0.51	18.35	5.94	0.07			99.05
"Lng73	G	41.67	0.17	18.55	6.24	8.5	0.48	18.74	5.35	0.05			99.75
"Lng75	G	40.34	0.09	17.43	7.44	8.37	0.57	19.06	6.05	0.06			99.41
"Lng76	G	42.71	0.9	19.41	3.22	8.49	0.3	20.6	4.69	0.08			100.4
"Lng77	G	42.08	0.54	20.06	3.68	7.35	0.33	21.07	4.44	0.07			99.62
"Lng78	G	41.93	0.98	19.57	2.24	9.78	0.35	20.06	4.63	0.07			99.61
"Lng79	G	42.1	0.92	20.57	1.25	9.06	0.32	19.28	5.94	0.08			99.52
"Lng80	G	41.45	0.19	19.67	4.7	8.24	0.48	19.72	4.92	0.03			99.4
"Lng81	G	38.64	0.05	20.95	0.04	27.76	1.17	6.16	6.05	0.03			100.85
"Lng82	G	41.79	0.24	19.34	5.26	8.22	0.49	19.33	5.18	0.06			99.91
"Lng83	G	42.03	0.22	18.34	6.01	6.93	0.35	20.44	4.69	0.03			99.04
"Lng85	G	41.78	0.96	19.71	2.22	9.9	0.32	19.51	4.61	0.08			99.09
"Lng86	G	41.63	0.06	19.1	5.62	8.2	0.54	19.82	4.7	0.06			99.73
"Lng90	G	41.32	0.99	20.43	2.12	9.94	0.34	19.8	4.64	0.08			99.66
"Lng91	G	41.63	1.12	19.03	2.79	9.94	0.37	19.75	4.86	0.07			99.56
"Lng94	G	41.58	0.11	20.15	3.91	8.9	0.51	19.85	4.34	0.04			99.39
"Lng95	G	39.97	1.19	11.95	11.81	7.99	0.4	19.26	7.44	0.1			100.11
"Lng96	G	38.48	0.07	20.84	0	28.6	0.88	6.56	5.38	0.06			100.87
"Lng97	G	42.46	0.8	20.07	2.27	8.24	0.29	21.35	4.39	0.06			99.93
"Lng98	G	41.65	0.16	19.13	5.59	8.3	0.49	18.87	5.37	0.04			99.6
"Lng99	G	39.86	1.26	12.6	11.77	8.32	0.34	17.35	7.52	0.11			99.13
"lngdG0	G	42.07	0.01	18.48	7.75	6.51	0.37	22.78	1.34	0			99.31
"lngdG0	G	43.09	0	20.83	5.92	5.78	0.31	21.51	1.81	0			99.25
"lngdG0	G	41.63	0.05	17.21	9.86	6.25	0.38	22.08	1.84	0			99.3
"lngdG0	G	42.23	0.05	18.03	6.6	7.66	0.42	21.31	2.86	0			99.16
"lngdG0	G	42.02	0.04	22.79	1.67	7.91	0.43	21.43	4.2	0			100.49
"lngdG0	G	42.3	0.07	21.93	1.39	8.19	0.35	20.8	4.21	0			99.24
"lngdG0	G	42.21	0.06	23.21	1.39	8.34	0.41	20.12	4.21	0			99.95
"lngdG0	G	42.9	0.05	23.07	1.45	7.26	0.39	20.03	4.38	0			99.53
"lngdG0	G	42.46	0.07	22.13	1.33	8.34	0.35	20.21	4.38	0			99.27
"lngdG0	G	41.87	0.04	22.93	1.49	8.29	0.38	19.7	4.39	0			99.09
"lngdG0	G	41.89	0.41	18.09	3.99	7.3	0.38	22.55	4.39	0			99
"lngdG0	G	41.8	0.4	19.95	4.09	7.38	0.37	21.14	4.54	0			99.67
"lngdG0	G	42.07	0.43	19.43	4.14	6.94	0.4	21.72	4.55	0			99.68
"lngdG0	G	41.47	0.36	19.31	3.95	7.39	0.35	21.87	4.63	0			99.33
"lngdG0	G	41.68	0.08	19.47	2.02	9.21	0.58	21.79	4.84	0			99.67
"lngdG0	G	42.15	0.06	21.66	1.82	8.47	0.56	19.78	4.87	0			99.37
"lngdG0	G	42.36	0.11	22.99	1.54	9.95	0.42	17.44	4.91	0			99.72
"lngdG0	G	41.62	0.12	19.99	4.89	7.13	0.33	20.21	4.94	0			99.23
"lngdG0	G	41.59	0.07	23.23	1.53	9.44	0.58	19.09	4.94	0			100.47
"lngdG0	G	41.74	0.12	19.25	5.12	7.34	0.34	21.22	4.96	0			100.09
"lngdG0	G	41.96	0.07	21.61	2.63	8.48	0.44	19.38	4.97	0			99.54
"lngdG0	G	42.2	0.06	20.97	1.96	8.16	0.53	20.14	4.98	0			99
"lngdG0	G	41.89	0.04	22.04	1.43	9.62	0.51	19.8	4.98	0			100.31
"lngdG0	G	42.44	0.04	23.19	2.04	8.55	0.55	17.8	5.01	0			99.62
"lngdG0	G	42.15	0.06	21.87	2.52	8.47	0.42	19.99	5.01	0			100.49
"lngdG0	G	41.38	0.07	23.09	2.1	8.22	0.49	19.38	5.04	0			99.77
"lngdG0	G	42.01	0.02	22.54	1.85	9.44	0.46	18.46	5.04	0			99.82
"lngdG0	G	42.16	0.09	21.71	3.31	8.52	0.49	18.24	5.05	0			99.57
"lngdG0	G	42.16	0.09	21.21	4.24	7.14	0.33	19.19	5.06	0			99.42
"lngdG0	G	42.03	0.02	21.58	1.62	9.16	0.41	19.44	5.09	0			99.35
"lngdG0	G	42.22	0.08	20.16	3.17	8.02	0.52	19.96	5.2	0			99.33
"lngdG0	G	41.91	0.04	22.54	2.2	8.44	0.49	18.92	5.31	0			99.85
"lngdG0	G	41.83	0.09	20.6	3.61	8.06	0.53	20.25	5.31	0			100.28
"lngdG0	G	41.83	0.09	21.24	3.4	7.97	0.49	19.1	5.36	0			99.48
"lngdG0	G	42.26	0.07	20.49	3.14	8.03	0.5	19.36	5.41	0			99.26
"lngdG0	G	42.05	0.1	21.85	3.43	7.64	0.47	18.73	5.44	0			99.71
"lngdG0	G	41.67	0.09	20.74	3.65	7.88	0.51	19.21	5.45	0			99.2
"lngdG0	G	42.41	0.08	21.64	3.53	7.88	0.51	18.47	5.45	0			99.97
"lngdG0	G	42.48	0.09	21.71	3.83	7.58	0.48	19.21	5.45	0			100.83
"lngdG0	G	41.83	0.08	22	2.73	8.44	0.48	18	5.47	0			99.03
"lngdG0	G	42.08	0.09	21.24	3.01	8.37	0.53	18.62	5.49	0			99.43
"lngdG0	G	42.56	0.08	20.86	3.19	8.34	0.56	18.19	5.5	0			99.28
"lngdG0	G	41.76	0.07	19.62	3.23	8.44	0.52	20.06	5.5	0			99.2
"lngdG0	G	42.04	0.03	22.32	1.36	9.07	0.62	18.31	5.51	0			99.26
"lngdG0	G	42.13	0.05	19.66	3.23	8.79	0.61	19.59	5.51	0			99.57
"lngdG0	G	41.75	0.08	19.5	3.73	7.9	0.49	20.74	5.51	0			99.7
"lngdG0	G	41.83	0.12	21.23	4.11	7.69	0.48	19.04	5.51	0			100.01
"lngdG0	G	41.75	0.29	15.32	9.53	6.86	0.47	19.48	5.54	0			99.24
"lngdG0	G	42.3	0.05	20.75	2.78	8.17	0.58	19.12	5.54	0			99.29
"lngdG0	G	41.75	0.09	20.65	3.76	7.72	0.5	19.55	5.55	0			99.57
"lngdG0	G	42.36	0.06	21.47	2.98	8.43	0.57	19.05	5.55	0			100.47
"lngdG0	G	40.98	0.27	15.34	10.25	7.07	0.36	19.6	5.58	0			99.45
"lngdG0	G	42.12	0.08	18.73	3.2	8.29	0.58	21.12	5.58	0			99.7
"lngdG0	G	41.53	0.12	20.42	4.05	7.59	0.43	19.82	5.59	0			99.55
"lngdG0	G	41.72	0.08	20.73	3.38	8.61	0.55	19.15	5.59	0			99.81
"lngdG0	G	41.88	0.06	21.02	3.04	8.23	0.57	19.24	5.6	0			99.64
"lngdG0	G	42.28	0.07	21.54	2.82	7.94	0.52	18.34	5.61	0			99.12
"lngdG0	G	41.94	0.05	20.85	3.15	8.41	0.51	18.84	5.61	0			99.36
"lngdG0	G	41.63	0.08	20.74	3.54	9.29	0.61	17.83	5.63	0			99.35
"lngdG0	G	41.85	0.06	21	2.61	8.44	0.52	19.34	5.63	0			99.45
"lngdG0	G	41.25	0.3	15.12	10.1	7.17	0.37	19.45	5.66	0			99.42
"lngdG0	G	41.56	0.13	20.81	4.21	7.62	0.44	18.88	5.66	0			99.31
"lngdG0	G	41.66	0.25	15.61	9.87	7.2	0.37	18.84	5.68	0			99.48
"lngdG0	G	41	0.26	17.32	9.72	7.06	0.37	18.59	5.68	0			100
"lngdG0	G	41.5	0.27	16.41	8.92	6.88	0.34	19.28	5.71	0			99.31
"lngdG0	G	42.3	0.14	19.49	4.06	7.71	0.48	19.58	5.73	0			99.49
"lngdG0	G	40.69	0.25	14.89	9.89	6.98	0.44	20.38	5.74	0			99.26
"lngdG0	G	41.97	0.13	20.18	4.26	7.58	0.49	19.15	5.75	0			99.51
"lngdG0	G	42.31	0.06	21.35	2.83	7.61	0.47	19.2	5.76	0			99.59
"lngdG0	G	41.44	0.03	20.64	3.33	9.31	0.55	18.61	5.79	0			99.7
"lngdG0	G	41.98	0.07	22.56	3.59	8.31	0.61	17.35	5.79	0			100.26
"lngdG0	G	40.72	0.3	15.39	10.24	7.16	0.39	19.71	5.81	0			99.72
"lngdG0	G	41.98	0.07	21.63	3.16	7.91	0.49	18.61	5.84	0			99.69
"lngdG0	G	41.59	0.06	20.72	3.17	9.65	0.62	18.55	5.85	0			100.21
"lngdG0	G	41.02	0.05	21.35	3	9.46	0.55	17.88	5.96	0			99.27
"lngdG0	G	41.38	0.08	20.63	3.67	8.81	0.49	19.12	5.98	0			100.16
"lngdG0	G	41.69	0.38	15.51	11.16	6.42	0.33	17.6	6.06	0			99.15
"lngdG0	G	40.82	0.35	14.81	11.49	6.61	0.37	18.68	6.09	0			99.22
"lngdG0	G	41.07	0.35	13.22	11.58	6.58	0.4	19.96	6.17	0			99.33
"lngdG0	G	40.8	0.34	14.35	11.26	7.92	0.36	17.92	6.24	0			99.19
"lngdG0	G	41.11	0.35	13.14	11.51	6.39	0.4	20.32	6.24	0			99.46
"lngdG0	G	40.35	0.35	14.12	12.06	7.29	0.38	18.42	6.26	0			99.23
"lngdG0	G	40.35	0.35	14.2	12.47	7.51	0.33	17.98	6.26	0			99.45
"lngdG0	G	40.81	0.37	14.31	11.93	6.76	0.35	18.82	6.29	0			99.64
"lngdG0	G	40.88	0.33	14.31	11.54	7.87	0.41	18.56	6.29	0			100.19
"lngdG0	G	40.74	0.33	14.1	12	8.05	0.47	17.36	6.3	0			99.35
"lngdG0	G	40.46	0.35	14.99	12.05	7.09	0.39	17.53	6.31	0			99.17
"lngdG0	G	40.69	0.34	14.51	12.09	7.41	0.45	17.4	6.33	0			99.22
"lngdG0	G	40.98	0.32	15.69	11.12	7.38	0.4	17.33	6.33	0			99.55
"lngdG0	G	40.65	0.33	12.76	11.71	7.46	0.38	19.68	6.36	0			99.33
"lngdG0	G	40.38	0.36	15.22	12.14	6.63	0.42	18.06	6.36	0			99.57
"lngdG0	G	40.48	0.28	14.98	11.55	8.15	0.42	16.98	6.38	0			99.22
"lngdG0	G	39.98	0.31	14.01	12.31	8.47	0.39	17.23	6.38	0			99.08
"lngdG0	G	40.52	0.31	14.6	12.07	8.27	0.4	16.78	6.38	0			99.33
"lngdG0	G	40.44	0.29	14.72	12.33	8.25	0.44	17.3	6.39	0			100.16
"lngdG0	G	40.57	0.28	14.2	12.8	8.52	0.38	16.24	6.41	0			99.4
"lngdG0	G	40.74	0.34	14.34	12.61	7.37	0.39	18.34	6.41	0			100.54
"lngdG0	G	40.82	0.35	13.79	12.19	7.91	0.39	17.46	6.42	0			99.33
"lngdG0	G	42.03	0.32	15.71	7.97	8.66	0.46	17.69	6.79	0			99.63
"lngdG1	G	41.6	0.11	22.64	1.08	10.79	0.54	17.96	4.53	0.02			99.27
"lngdG1	G	42.14	0.04	22.08	0.98	10.69	0.59	19.52	4.56	0.02			100.62
"lngdG1	G	41.28	0.07	22.47	1.03	10.87	0.58	18.68	4.64	0.02			99.64
"lngdG1	G	41.82	0.08	22.79	0.92	10.31	0.55	18.01	4.66	0.02			99.16
"lngdG1	G	43.12	0.01	23.95	0.99	8.81	0.52	17.37	4.91	0			99.68
"lngdG1	G	41.9	0.05	23.04	0.98	9.22	0.43	18.51	5.07	0			99.2
"lngdG1	G	42.52	0.04	22.7	1.01	8.75	0.5	19.09	5.11	0			99.72
"lngdG1	G	42.36	0.02	21.76	1.07	9.84	0.64	18.38	5.17	0			99.24
"lngdG1	G	42.38	0.05	24.57	1.12	8.78	0.4	18.27	5.19	0			100.76
"lngdG1	G	41.51	0.03	22.95	1	10.1	0.51	17.77	5.24	0.02			99.13
"lngdG1	G	41.99	0.04	22.61	0.92	9.89	0.58	18.24	5.28	0			99.55
"lngdG1	G	42.65	0.01	20.82	1.09	9.09	0.66	19.59	5.31	0			99.22
"lngdG1	G	41.22	0.03	23.42	0.94	10.02	0.51	18.1	5.34	0.02			99.6
"lngdG1	G	41.55	0	22.52	1.1	9.77	0.65	18.35	5.36	0			99.3
"lngdG1	G	41.86	0.02	22.43	0.93	9.44	0.55	18.98	5.38	0			99.59
"lngdG1	G	41.97	0.1	21.76	1.02	10.12	0.56	18.35	5.38	0.02			99.28
"lngdG1	G	41.96	0.01	21.92	1.19	9.46	0.5	19.07	5.38	0			99.49
"lngdG1	G	42.26	0.03	23.73	0.96	8.98	0.48	18.49	5.38	0			100.31
"lngdG1	G	42.29	0.03	21.34	1.13	9.18	0.56	19.64	5.4	0			99.57
"lngdG1	G	41.51	0.02	22.87	0.96	10.15	0.58	17.78	5.4	0.02			99.29
"lngdG1	G	42.13	0.02	21.42	0.99	10.08	0.58	18.75	5.4	0.02			99.39
"lngdG1	G	42	0.02	23.73	0.96	10.37	0.53	16.98	5.4	0.02			100.01
"lngdG1	G	42.52	0	22.91	0.94	8.16	0.55	19.08	5.41	0			99.57
"lngdG1	G	42.59	0.04	20.37	0.97	9.47	0.61	19.81	5.41	0			99.27
"lngdG1	G	42.04	0.03	22.95	0.98	9.5	0.53	17.73	5.41	0			99.17
"lngdG1	G	43.06	0.02	21.68	1.18	9.51	0.61	17.96	5.42	0			99.44
"lngdG1	G	42.64	0.03	20.88	0.98	10.36	0.59	18.39	5.42	0.02			99.31
"lngdG1	G	41.89	0.02	22.32	1.02	10.18	0.55	18.25	5.43	0.02			99.68
"lngdG1	G	42.35	0.03	22.52	0.93	10.04	0.54	17.87	5.43	0.02			99.73
"lngdG1	G	41.57	0.02	23.49	0.94	9.23	0.54	18.98	5.43	0			100.2
"lngdG1	G	41.93	0.02	22.44	0.93	10.1	0.54	17.97	5.44	0.02			99.39
"lngdG1	G	42.26	0.03	22.53	1.07	9.68	0.56	17.51	5.45	0			99.09
"lngdG1	G	42.1	0.04	23.35	1.05	9.54	0.57	17.19	5.45	0			99.29
"lngdG1	G	42.07	0.03	20.58	0.98	10.3	0.59	19.55	5.45	0.02			99.57
"lngdG1	G	41.68	0.03	21.84	0.95	10.28	0.58	18.81	5.45	0.02			99.64
"lngdG1	G	42.01	0.02	24.02	0.92	9.47	0.54	17.77	5.45	0			100.2
"lngdG1	G	42.03	0.1	22.44	1.06	10.03	0.55	17.53	5.46	0.02			99.22
"lngdG1	G	42.19	0.02	20.57	1.03	10.15	0.62	19.45	5.46	0.02			99.51
"lngdG1	G	42.04	0.02	22.7	0.96	10.29	0.56	17.67	5.46	0.02			99.72
"lngdG1	G	42.85	0.01	23.41	1	8.64	0.6	18.01	5.47	0			99.99
"lngdG1	G	42.1	0.03	21.67	0.93	9.89	0.56	18.82	5.47	0			99.47
"lngdG1	G	41.46	0.03	21.96	1.08	9.67	0.58	19.51	5.47	0			99.76
"lngdG1	G	41.98	0.03	21.42	1	10.02	0.62	19.52	5.47	0.02			100.08
"lngdG1	G	42.18	0.03	20.61	1.04	10.46	0.54	20.12	5.47	0.02			100.47
"lngdG1	G	41.21	0.01	21.7	1.01	9.87	0.47	19.28	5.48	0			99.03
"lngdG1	G	42.05	0.02	22.16	1.04	9.44	0.54	18.71	5.49	0			99.45
"lngdG1	G	42.06	0.01	21.83	0.95	9.21	0.57	19.18	5.49	0			99.3
"lngdG1	G	42.32	0.03	21.99	0.98	9.99	0.53	18.33	5.49	0			99.66
"lngdG1	G	42.32	0.03	23.27	0.93	10.23	0.57	17.11	5.49	0.02			99.97
"lngdG1	G	42.14	0.03	23.28	1.05	10.14	0.48	18.29	5.49	0.02			100.92
"lngdG1	G	41.85	0.02	22.21	1	10.12	0.54	18.21	5.5	0.02			99.47
"lngdG1	G	41.86	0.02	23.49	0.98	9.64	0.54	17.27	5.5	0			99.3
"lngdG1	G	42.07	0.01	22.95	0.92	9.57	0.56	17.54	5.5	0			99.12
"lngdG1	G	41.76	0.01	22.83	0.95	9.83	0.46	17.99	5.5	0			99.33
"lngdG1	G	41.64	0.03	23.08	0.98	10.11	0.51	17.84	5.5	0.02			99.71
"lngdG1	G	41.62	0.03	23.15	0.96	10.08	0.56	17.5	5.51	0.02			99.43
"lngdG1	G	42.21	0.1	23.37	0.92	10.03	0.52	16.77	5.51	0.02			99.45
"lngdG1	G	41.48	0.03	22.4	1.12	10.28	0.59	18.23	5.51	0.02			99.66
"lngdG1	G	41.96	0.03	20.58	1.08	10.3	0.6	19.03	5.52	0.02			99.12
"lngdG1	G	41.81	0.03	22.76	1.04	10.25	0.5	17.32	5.52	0.02			99.25
"lngdG1	G	41.74	0.02	21.39	1.01	10.43	0.58	18.57	5.52	0.02			99.28
"lngdG1	G	42.26	0.01	21.7	0.94	10	0.52	18.33	5.53	0			99.29
"lngdG1	G	41.72	0.03	22.94	1.1	10.06	0.51	17.39	5.53	0.02			99.3
"lngdG1	G	41.76	0.1	23.3	0.99	10.3	0.54	17.84	5.53	0.02			100.38
"lngdG1	G	42.18	0	22.95	1.3	8.45	0.53	18.12	5.54	0			99.07
"lngdG1	G	41.8	0.02	21.89	0.99	10.28	0.57	18.43	5.54	0.02			99.54
"lngdG1	G	42.44	0.02	21.99	0.97	9.8	0.61	18.11	5.54	0			99.48
"lngdG1	G	42.06	0.02	22.01	1.07	10.03	0.56	18.25	5.54	0.02			99.56
"lngdG1	G	41.6	0.1	21.7	1.13	10.14	0.55	19.01	5.54	0.02			99.79
"lngdG1	G	42.45	0.1	23.71	0.95	10.12	0.55	17.54	5.54	0.02			100.98
"lngdG1	G	42.17	0.02	22.02	0.96	9	0.63	18.88	5.55	0			99.23
"lngdG1	G	41.81	0.1	22.06	1.09	10.34	0.57	17.85	5.55	0.02			99.39
"lngdG1	G	41.41	0.03	23.11	1.05	10.18	0.54	17.43	5.55	0.02			99.32
"lngdG1	G	42.19	0	24	1.1	9.39	0.51	17.53	5.55	0			100.27
"lngdG1	G	42.56	0.02	22.64	0.92	10.29	0.56	18.13	5.55	0.02			100.69
"lngdG1	G	42.22	0.1	22.91	1.04	10.16	0.56	16.84	5.56	0.02			99.41
"lngdG1	G	41.89	0.03	22.48	1.01	10.22	0.6	17.72	5.56	0.02			99.53
"lngdG1	G	41.72	0.02	23.62	0.96	10.24	0.55	17.36	5.56	0.02			100.05
"lngdG1	G	42.74	0.01	22.42	0.97	9.21	0.55	18.09	5.57	0			99.56
"lngdG1	G	42.2	0.02	22.43	0.94	10.1	0.5	18.35	5.57	0.02			100.13
"lngdG1	G	42.3	0.02	22.81	0.97	10.43	0.52	17.92	5.57	0.02			100.56
"lngdG1	G	43.54	0.02	19.24	1.04	9.84	0.55	20.12	5.57	0			99.92
"lngdG1	G	41.9	0.01	21.14	0.97	9.37	0.58	19.78	5.58	0			99.33
"lngdG1	G	41.87	0.01	22.45	1.03	9.53	0.46	18.08	5.58	0			99.01
"lngdG1	G	41.98	0.02	23.39	1.03	10.01	0.52	17.1	5.58	0.02			99.65
"lngdG1	G	42.04	0.02	23.23	1.04	8.84	0.54	17.99	5.59	0			99.29
"lngdG1	G	41.3	0.1	21.71	0.99	10.15	0.54	18.74	5.59	0.02			99.14
"lngdG1	G	42.29	0	23.29	1.13	8.7	0.55	18.12	5.59	0			99.67
"lngdG1	G	41.88	0.1	22.71	1.02	10.2	0.53	17.17	5.6	0.02			99.23
"lngdG1	G	41.85	0.01	21.87	0.95	9.06	0.59	19.21	5.61	0			99.15
"lngdG1	G	41.71	0.02	23.94	0.93	9.03	0.45	17.73	5.61	0			99.42
"lngdG1	G	41.29	0.02	21.48	1.25	10.3	0.56	18.71	5.62	0.02			99.25
"lngdG1	G	41.03	0.1	22.41	1.17	10.05	0.54	18.35	5.62	0.02			99.29
"lngdG1	G	42.26	0.02	21.93	0.98	10.17	0.54	18.16	5.62	0.02			99.7
"lngdG1	G	41.85	0.02	24.67	1.15	9.99	0.54	17.13	5.63	0			100.98
"lngdG1	G	42.26	0.02	23.15	1.16	10.01	0.59	18	5.64	0.02			100.85	22.65
"lngdG1	G	42.29	0.01	22.7	1.01	9.43	0.56	18.05	5.66	0			99.71	22.2
"lngdG1	G	42.16	0.02	23.44	0.93	10.12	0.56	17.87	5.68	0.02			100.8	22.94
"lngdG1	G	42.04	0.01	22.96	1.15	9.99	0.55	17.18	5.72	0			99.6	22.46
"lngdG1	G	42.18	0.03	22.9	1.24	9.1	0.6	17.34	5.99	0			99.38	20.9
"lngdG2	G	42.28	0.02	23.43	0.79	7.83	0.42	19.72	4.7	0.02			99.21
"lngdG2	G	42.36	0.05	24.16	0.4	7.35	0.25	20.13	4.72	0.02			99.44
"lngdG2	G	42.8	0.04	22.63	0.81	9.43	0.4	18.45	4.76	0.02			99.34
"lngdG2	G	42.22	0.02	23.24	0.77	9.44	0.43	19.08	4.76	0.02			99.98
"lngdG2	G	42.44	0.03	22.79	0.49	9.37	0.42	19.52	4.82	0.02			99.9
"lngdG2	G	42.22	0.04	23.32	0.86	10.21	0.57	18.44	4.83	0.02			100.51
"lngdG2	G	42.32	0.04	22.11	0.58	8.46	0.37	20.63	4.85	0.02			99.38
"lngdG2	G	42.04	0.04	23.22	0.72	8.64	0.29	19.55	4.87	0.02			99.39
"lngdG2	G	42.76	0.03	23.46	0.69	9.02	0.34	19.52	4.9	0.02			100.74
"lngdG2	G	42.38	0.03	23.58	0.71	8.72	0.35	18.9	4.91	0.02			99.6
"lngdG2	G	42.26	0.02	23.99	0.69	8.91	0.33	18.58	4.91	0.02			99.71
"lngdG2	G	42.28	0.07	22.29	0.7	10.46	0.5	18.07	4.95	0.02			99.34
"lngdG2	G	42.49	0.03	23.62	0.56	7.85	0.27	19.25	4.96	0.02			99.05
"lngdG2	G	42.74	0.04	23.29	0.7	8.58	0.3	20.15	4.97	0.02			100.79
"lngdG2	G	42.65	0.04	23.62	0.65	8.54	0.33	19.99	4.97	0.02			100.81
"lngdG2	G	42.53	0.02	23	0.63	9.01	0.33	19.83	4.98	0.02			100.35
"lngdG2	G	42.09	0.06	22.38	0.8	7.56	0.27	21.44	4.99	0.02			99.61
"lngdG2	G	42.71	0.03	24.68	0.52	8.39	0.33	18.96	5.1	0.02			100.74
"lngdG2	G	42.36	0.02	24.78	0.62	9.01	0.39	18.66	5.11	0.02			100.97
"lngdG2	G	42.11	0.03	23.74	0.79	10.59	0.6	17.91	5.14	0.02			100.93
"lngdG2	G	42.24	0.02	23.2	0.52	9.93	0.56	17.44	5.16	0.02			99.09
"lngdG2	G	41.91	0.02	22.15	0.63	8.45	0.35	20.29	5.2	0.02			99.02
"lngdG2	G	42.78	0.03	23.71	0.39	8.68	0.3	18.84	5.2	0.02			99.95
"lngdG2	G	41.83	0.03	22.56	0.77	9.6	0.54	18.65	5.23	0.02			99.23
"lngdG2	G	42.34	0.02	23.65	0.83	9.94	0.48	16.69	5.24	0.02			99.21
"lngdG2	G	41.6	0.02	23.91	0.84	10.01	0.62	17.17	5.28	0.02			99.47
"lngdG2	G	41.89	0.02	23.98	0.9	9.11	0.53	17.89	5.28	0			99.6
"lngdG2	G	42.17	0.02	22.08	0.85	10.03	0.55	18.71	5.28	0.02			99.71
"lngdG2	G	41.99	0.02	23.77	0.79	10.33	0.57	16.57	5.3	0.02			99.36
"lngdG2	G	42.34	0.03	21.08	0.83	9.66	0.58	19.4	5.31	0.02			99.25
"lngdG2	G	41.91	0.1	23.44	0.84	10.03	0.49	17.17	5.32	0.02			99.32
"lngdG2	G	42.45	0.02	23.26	0.77	9.38	0.53	17.67	5.32	0.02			99.42
"lngdG2	G	42.22	0.03	21.67	0.88	9.18	0.58	19.76	5.34	0.02			99.68
"lngdG2	G	41.93	0.02	20.84	0.82	9.23	0.54	20.4	5.35	0.02			99.15
"lngdG2	G	42.3	0.03	22.5	0.68	9.52	0.54	18.74	5.35	0.02			99.68
"lngdG2	G	42.46	0.02	22.63	0.84	9.76	0.53	17.72	5.36	0.02			99.34
"lngdG2	G	42.09	0.02	21.75	0.87	9.71	0.59	18.76	5.37	0.02			99.18
"lngdG2	G	41.62	0.03	23.75	0.82	10.12	0.57	17.26	5.37	0.02			99.56
"lngdG2	G	42.67	0.02	22.6	0.76	8.39	0.54	19.15	5.38	0.02			99.53
"lngdG2	G	41.78	0.02	23.09	0.9	10.22	0.55	17.07	5.38	0.02			99.03
"lngdG2	G	42.25	0.03	21.82	0.85	10.02	0.48	19.03	5.38	0.02			99.88
"lngdG2	G	42.09	0.1	22.91	0.85	10.2	0.55	17.14	5.39	0.02			99.25
"lngdG2	G	42.19	0.1	22.51	0.85	9.79	0.5	18	5.4	0.02			99.36
"lngdG2	G	42.18	0.02	21.73	0.88	9.56	0.48	19.4	5.4	0.02			99.67
"lngdG2	G	41.83	0.03	23.59	0.9	9.72	0.6	16.96	5.41	0			99.04
"lngdG2	G	42	0.1	22.35	0.81	10.07	0.55	18.1	5.41	0.02			99.41
"lngdG2	G	42.33	0.03	21.08	0.91	9.99	0.57	19.02	5.41	0			99.34
"lngdG2	G	42.31	0.1	23.21	0.79	10.06	0.48	18.32	5.41	0.02			100.7
"lngdG2	G	42.38	0.1	24.22	0.75	10.16	0.56	17.21	5.41	0.02			100.81
"lngdG2	G	42.21	0.02	23.58	0.89	9.89	0.46	16.58	5.42	0.02			99.07
"lngdG2	G	42.22	0.03	23.99	0.77	9.08	0.51	17.38	5.43	0.02			99.43
"lngdG2	G	42.15	0.04	22.12	0.76	9.43	0.54	18.56	5.43	0.02			99.05
"lngdG2	G	42.33	0.03	22.7	0.86	9.86	0.61	17.85	5.43	0.02			99.69
"lngdG2	G	42.16	0.03	21.15	0.92	10.14	0.61	18.79	5.44	0.02			99.26
"lngdG2	G	41.9	0.1	22.77	0.77	10.44	0.56	17.07	5.44	0.02			99.07
"lngdG2	G	41.92	0.02	22.65	0.51	9.56	0.54	19.08	5.44	0.02			99.74
"lngdG2	G	41.52	0.02	22.74	0.8	10.1	0.51	18.7	5.44	0.02			99.85
"lngdG2	G	42.57	0.1	23.71	0.51	9.71	0.54	18.1	5.44	0.02			100.7
"lngdG2	G	42.07	0.03	21.17	0.86	9.63	0.54	19.55	5.45	0.02			99.32
"lngdG2	G	42.43	0.03	24.19	0.73	8.76	0.48	17.2	5.45	0.02			99.29
"lngdG2	G	42.16	0.03	23.89	0.83	10.24	0.56	17.16	5.45	0.02			100.34
"lngdG2	G	42.45	0.03	23.65	0.59	9.79	0.54	18.21	5.45	0.02			100.73
"lngdG2	G	41.82	0.03	21.79	0.85	10.26	0.55	18.68	5.46	0.02			99.46
"lngdG2	G	41.97	0.03	22.89	0.82	9.66	0.48	18.02	5.46	0.02			99.35
"lngdG2	G	42.3	0.02	22.46	0.63	10.23	0.55	19.01	5.46	0.02			100.68
"lngdG2	G	42.28	0.03	22.52	0.91	9.99	0.53	17.91	5.47	0			99.64
"lngdG2	G	41.8	0.1	22.2	0.85	10.09	0.55	18.63	5.48	0.02			99.72
"lngdG2	G	41.87	0.02	23.53	0.85	10.16	0.53	17.42	5.49	0.02			99.89
"lngdG2	G	42.03	0.03	23.8	0.88	9.7	0.52	18.16	5.49	0.02			100.63
"lngdG2	G	42.29	0.1	21.84	0.75	10.24	0.51	19.57	5.49	0.02			100.81
"lngdG2	G	41.81	0.03	22.62	0.79	9.26	0.49	19.03	5.5	0.02			99.55
"lngdG2	G	41.36	0.02	23.24	0.9	9.54	0.52	17.98	5.5	0			99.06
"lngdG2	G	42.12	0.02	22.62	0.88	10.03	0.55	17.56	5.5	0.02			99.3
"lngdG2	G	42.67	0.02	22.7	0.88	9.02	0.56	17.87	5.51	0.02			99.25
"lngdG2	G	42.18	0.02	23.02	0.85	9.31	0.5	17.97	5.51	0.02			99.38
"lngdG2	G	41.88	0.02	23.44	0.88	10.29	0.58	16.83	5.51	0.02			99.45
"lngdG2	G	42.52	0.02	23.29	0.68	8.65	0.44	18.9	5.51	0.02			100.03
"lngdG2	G	41.71	0.1	22.85	0.88	10.17	0.53	18.37	5.51	0.02			100.14
"lngdG2	G	41.97	0.04	23.74	0.69	10.23	0.54	17.85	5.51	0.02			100.59
"lngdG2	G	41.58	0.03	21.74	0.76	10.21	0.56	18.94	5.52	0.02			99.36
"lngdG2	G	42.38	0.02	23.2	0.53	8.62	0.47	18.65	5.52	0.02			99.41
"lngdG2	G	41.49	0.1	22.02	0.78	9.8	0.53	18.96	5.53	0.02			99.23
"lngdG2	G	42.8	0.02	23.28	0.81	9.19	0.43	17.36	5.53	0.02			99.44
"lngdG2	G	42.46	0.02	23.86	0.79	9.22	0.51	17.52	5.54	0.02			99.94
"lngdG2	G	41.81	0.1	22.79	0.63	9.59	0.54	17.97	5.56	0.02			99.01
"lngdG2	G	42.89	0.02	23.45	0.89	8.75	0.42	17.48	5.57	0.02			99.49
"lngdG2	G	42.13	0.03	23.5	0.63	10	0.56	17.76	5.57	0.02			100.2
"lngdG2	G	42.07	0.02	24.16	0.87	10.26	0.51	17.28	5.57	0.02			100.76
"lngdG2	G	41.93	0.02	23.06	0.77	9.48	0.53	17.91	5.59	0.02			99.31
"lngdG2	G	41.54	0.1	22.96	0.87	9.41	0.55	18.11	5.59	0.02			99.15
"lngdG2	G	42.69	0.1	23.18	0.59	8.46	0.43	18.43	5.59	0.02			99.49
"lngdG2	G	41.47	0.1	22.72	0.92	10.25	0.5	18.48	5.59	0.02			100.05
"lngdG2	G	42.1	0.02	24.32	0.76	9	0.46	17.71	5.61	0.02			100
"lngdG2	G	41.55	0.1	23.33	0.74	9.48	0.58	18.09	5.63	0.02			99.52
"lngdG2	G	42.15	0.02	22.13	0.73	9.97	0.53	19.21	5.63	0.02			100.39	21.63
"lngdG2	G	41.81	0.04	23.57	0.87	9.43	0.5	17.86	5.64	0.02			99.74	23.07
"lngdG2	G	42.27	0.03	22.15	0.89	9.38	0.49	18.23	5.65	0.02			99.11	21.65
"lngdG2	G	39.79	0.06	22.06	0.32	19.69	0.49	10.97	5.81	0.02			99.21	21.56
"lngdG2	G	39.93	0.14	22.64	0.33	18.41	0.5	11.71	5.87	0.02			99.55	21.84
"lngdG2	G	40.6	0.05	22.74	0.31	16.51	0.39	12.55	5.96	0.02			99.13	21.94
"lngdG3	G	38.8	0.75	21.39	0.02	26.71	0.41	5.96	5.21	0.02			99.27
"lngdG3	G	37.91	0.05	21.27	0.02	28.42	0.51	6.02	5.46	0.02			99.68
"lngdG3	G	40.21	0.48	22.67	0.24	17.95	0.37	12.6	5.59	0.02			100.13
"lngdG3	G	40.84	0.11	22.48	0.26	15.19	0.31	14.63	5.61	0.02			99.45
"lngdG3	G	40.02	0.04	21.99	0.22	18.52	0.42	13.23	5.65	0.02			100.11
"lngdG3	G	40.72	0.03	22.44	0.25	14.93	0.33	14.7	5.68	0.02			99.1
"lngdG3	G	40.49	0.04	20.7	0.21	20.82	0.6	11.47	5.7	0.02			100.05
"lngdG3	G	41.09	0.08	20.45	0.25	15.89	0.38	16.25	5.7	0.02			100.11
"lngdG3	G	40.8	0.16	21.7	0.3	17.07	0.41	13.16	5.71	0.02			99.33
"lngdG3	G	40.58	0.08	22	0.25	18.21	0.52	12.12	5.72	0.02			99.5
"lngdG3	G	40.83	0.08	22.72	0.25	15.04	0.35	14.45	5.72	0.02			99.46
"lngdG3	G	40.87	0.07	22.31	0.31	16.03	0.3	14.03	5.75	0.02			99.69
"lngdG3	G	40.91	0.11	22.42	0.26	14.91	0.35	14.56	5.75	0.02			99.29
"lngdG3	G	39.71	0.09	22.61	0.29	18.13	0.4	12.54	5.75	0.02			99.54
"lngdG3	G	40.85	0.05	22.76	0.21	18.88	0.52	10.5	5.76	0.02			99.55
"lngdG3	G	40.04	0.1	22.63	0.26	19.45	0.56	10.69	5.76	0.02			99.51
"lngdG3	G	41.21	0.1	21.75	0.25	15.7	0.31	14.27	5.76	0.02			99.37
"lngdG3	G	40.8	0.09	22.81	0.31	18.62	0.43	11.88	5.76	0.02			100.72
"lngdG3	G	39.87	0.15	22.04	0.27	18.99	0.44	11.68	5.78	0.02			99.24
"lngdG3	G	40.77	0.11	23.05	0.26	14.95	0.29	14.82	5.78	0.02			100.05
"lngdG3	G	40.65	0.24	22.1	0.27	15.51	0.39	14.66	5.79	0.02			99.63
"lngdG3	G	40.7	0.05	22.6	0.25	16.48	0.36	13.86	5.79	0.02			100.11
"lngdG3	G	41.06	0.2	24.52	0.19	15.5	0.32	13.21	5.79	0.02			100.81
"lngdG3	G	41.01	0.03	23.21	0.27	17.21	0.57	11.43	5.8	0.02			99.55
"lngdG3	G	41.05	0.02	21.48	0.29	17.32	0.49	12.77	5.8	0.02			99.24
"lngdG3	G	41.8	0.05	20.43	0.24	16.23	0.35	14.78	5.8	0.02			99.7
"lngdG3	G	40.63	0.05	23.84	0.23	18.13	0.4	11.85	5.8	0.02			100.95
"lngdG3	G	40.16	0.18	21.75	0.28	20.16	0.65	10.16	5.81	0.02			99.17
"lngdG3	G	40.25	0.05	23.04	0.27	16.42	0.4	12.78	5.81	0.02			99.04
"lngdG3	G	39.8	0.03	22.36	0.23	19.1	0.4	11.41	5.81	0.02			99.16
"lngdG3	G	40.98	0.05	21.36	0.27	15.13	0.38	15.08	5.82	0.02			99.09
"lngdG3	G	40.44	0.03	22.84	0.27	17.44	0.43	11.89	5.82	0.02			99.18
"lngdG3	G	40.54	0.05	22.75	0.31	16.67	0.35	12.83	5.84	0.02			99.36
"lngdG3	G	40.99	0.1	22.03	0.25	16.35	0.39	14.66	5.84	0.02			100.63
"lngdG3	G	40.68	0.04	22.98	0.31	16.49	0.46	12.61	5.86	0.02			99.45
"lngdG3	G	40.91	0.07	21.67	0.29	15.8	0.33	15.08	5.86	0.02			100.03
"lngdG3	G	41.91	0.07	22.07	0.25	15.25	0.35	14.19	5.86	0.02			99.97
"lngdG3	G	41.16	0.1	21.65	0.26	16.1	0.38	13.89	5.87	0.02			99.43
"lngdG3	G	41.28	0.08	22.58	0.27	14.91	0.33	13.91	5.87	0.02			99.25
"lngdG3	G	40.27	0.12	21.75	0.29	19.37	0.55	11.66	5.87	0.02			99.9
"lngdG3	G	41	0.03	22.59	0.24	14.8	0.37	14.21	5.88	0.02			99.14
"lngdG3	G	39.88	0.14	22.15	0.25	18.27	0.43	12.12	5.88	0.02			99.14
"lngdG3	G	41.06	0.08	24.05	0.22	14.88	0.37	14.16	5.88	0.02			100.72
"lngdG3	G	41.02	0.07	21.29	0.24	18.37	0.49	12.2	5.89	0.02			99.59
"lngdG3	G	40.7	0.15	22.33	0.25	17.76	0.44	12.13	5.89	0.02			99.67
"lngdG3	G	40.46	0.08	23.11	0.24	16.11	0.34	13.47	5.89	0.02			99.72
"lngdG3	G	40.66	0.04	21.96	0.15	17.65	0.39	13.61	5.89	0.02			100.37
"lngdG3	G	41.02	0.04	23.04	0.27	16.2	0.39	13.88	5.89	0.02			100.75
"lngdG3	G	41.06	0.04	21.59	0.26	16.94	0.38	13.08	5.9	0.02			99.27
"lngdG3	G	40.82	0.09	22.26	0.26	15.36	0.31	14.99	5.9	0.02			100.01
"lngdG3	G	40.51	0.1	22.37	0.24	17.51	0.45	11.9	5.91	0.02			99.01
"lngdG3	G	39.77	0.03	22.47	0.23	19.64	0.59	11.21	5.92	0.02			99.88
"lngdG3	G	39.72	0.17	20.88	0.04	23.39	0.55	8.73	5.93	0.02			99.43
"lngdG3	G	40.96	0.05	22	0.29	15.79	0.35	14.06	5.93	0.02			99.45
"lngdG3	G	40.8	0.05	21.96	0.26	16.04	0.35	14.28	5.94	0.02			99.7
"lngdG3	G	39.98	0.07	21.09	0.25	18.02	0.34	13.75	5.94	0.02			99.46
"lngdG3	G	40.68	0.14	22.61	0.26	15.68	0.3	14.54	5.94	0.02			100.17
"lngdG3	G	41.14	0.36	23.45	0.24	15.13	0.37	14.05	5.94	0.02			100.7
"lngdG3	G	40.46	0.02	24.41	0.3	16.14	0.41	13.03	5.95	0.02			100.74
"lngdG3	G	40.48	0.03	22.36	0.25	17.65	0.43	12.3	5.96	0.02			99.48
"lngdG3	G	40.84	0.12	22.93	0.26	15.53	0.35	13.27	5.96	0.02			99.28
"lngdG3	G	40.57	0.2	22.3	0.28	16.41	0.32	13.45	5.96	0.02			99.51
"lngdG3	G	40.19	0.06	22.82	0.24	19.64	0.47	11.32	5.96	0.02			100.72
"lngdG3	G	40.32	0.22	21.11	0.29	16.56	0.36	14.52	5.97	0.02			99.37
"lngdG3	G	40.41	0.19	21.87	0.18	17.17	0.34	13.55	5.97	0.02			99.7
"lngdG3	G	40.38	0.13	22.03	0.31	15.23	0.29	15.34	5.97	0.02			99.7
"lngdG3	G	40.55	0.19	22.98	0.18	17.74	0.37	12.37	5.97	0.02			100.37
"lngdG3	G	40.96	0.05	23.01	0.27	15.09	0.36	13.31	5.98	0.02			99.05
"lngdG3	G	40.6	0.16	22.48	0.16	15.59	0.33	14.17	5.98	0.02			99.49
"lngdG3	G	40.96	0.09	21.98	0.16	16.9	0.38	13.54	5.98	0.02			100.01
"lngdG3	G	40.96	0.25	21.84	0.28	16.91	0.41	14.2	5.99	0.02			100.86
"lngdG3	G	41.16	0.03	24.57	0.18	12.98	0.26	13.96	6	0.02			99.16
"lngdG3	G	41.36	0.15	21.49	0.29	15.24	0.35	14.22	6.01	0.02			99.13
"lngdG3	G	40.56	0.03	22.47	0.2	17.3	0.36	13.41	6.03	0.02			100.38
"lngdG3	G	40.76	0.08	21.88	0.25	16.53	0.39	13.45	6.04	0.02			99.4
"lngdG3	G	40.78	0.04	21.82	0.28	15.63	0.37	14.34	6.04	0.02			99.32
"lngdG3	G	40.71	0.08	21.42	0.25	15.73	0.32	14.75	6.04	0.02			99.32
"lngdG3	G	40.78	0.1	22.92	0.24	15.82	0.36	13.43	6.05	0.02			99.72
"lngdG3	G	41.71	0.09	22.01	0.3	14.9	0.38	14.06	6.06	0.02			99.53
"lngdG3	G	40.38	0.05	21.6	0.25	14.99	0.32	15.38	6.06	0.02			99.05
"lngdG3	G	41.18	0.03	23.77	0.22	14	0.4	13.53	6.07	0.02			99.22
"lngdG3	G	40.97	0.09	23.28	0.25	15.58	0.38	13.24	6.07	0.02			99.88
"lngdG3	G	41.28	0.06	23.36	0.28	16.08	0.37	13.07	6.07	0.02			100.59
"lngdG3	G	41.03	0.12	23.56	0.27	16.23	0.34	13.1	6.1	0.02			100.77
"lngdG3	G	41.21	0.11	22.6	0.15	15.05	0.37	13.9	6.11	0.02			99.52
"lngdG3	G	41.51	0.03	23.37	0.27	16.42	0.39	12.22	6.15	0.03			100.39
"lngdG3	G	40.08	0.1	22.4	0.24	19.2	0.48	11.55	6.15	0.03			100.23
"lngdG3	G	41.06	0.03	22.19	0.2	16.38	0.37	13.77	6.16	0.03			100.19
"lngdG3	G	39.24	0.33	22.36	0.02	23.15	0.52	8.93	6.2	0.03			100.78
"lngdG3	G	40.58	0.1	22.1	0.26	16.44	0.36	13.31	6.3	0.03			99.48
"lngdG3	G	39.76	0.1	22.15	0.27	19.08	0.63	10.96	6.45	0.03			99.43
"lngdG3	G	38.12	0.05	21.28	0.04	25.87	0.54	5.88	7.56	0.03			99.37	20.78
"lngdG3	G	41.69	0.1	23.43	0.3	15.49	0.47	10.24	7.78	0.03			99.53	22.93
"lngdG3	G	38.53	0.62	20.78	0.02	24.23	0.64	6.37	8.03	0.03			99.25	20.28
"lngdG3	G	38	0.03	21.62	0	25.3	0.54	5.84	8.32	0.03			99.68	21.12
"lngdG3	G	38.3	0.04	21.73	0	25	0.51	6.08	8.38	0.03			100.07	20.93
"lngdG3	G	39.02	0.03	22.09	0.01	23.52	0.51	5.9	8.39	0.03			99.5	21.29
"lngdG3	G	38.93	0.03	20.64	0.02	24.11	0.56	6.89	8.39	0.03			99.6	19.84
"lngdG3	G	38.95	0.03	22.99	0.01	22.57	0.6	6.03	8.78	0.04			100	20.99
"lngdG3	G	37.89	0.06	21.3	0.02	23.26	2.17	3.82	11.69	0.05			100.26	19.3
"lngdG4	G	42.51	0.04	18.98	7.72	6.23	0.33	22.35	1.24	0			99.4
"lngdG4	G	42.13	0.03	18.36	7.88	6.14	0.31	23.12	1.24	0			99.21
"lngdG4	G	41.72	0.04	18.97	7.63	6.1	0.31	23.09	1.27	0			99.13
"lngdG4	G	42.28	0.03	17.37	7.13	7.27	0.33	24.43	1.28	0			100.12
"lngdG4	G	42.36	0.03	16.75	8.81	6.98	0.31	23.84	1.28	0			100.36
"lngdG4	G	42.53	0.04	17.55	7.05	6.95	0.31	24.71	1.29	0			100.43
"lngdG4	G	42.2	0.03	17.42	6.98	6.93	0.29	25.01	1.3	0			100.16
"lngdG4	G	38.68	0.06	21.92	0.08	29.86	1.15	4.65	2.6	0.01			99.01
"lngdG4	G	39.68	0.09	20.84	0.09	28.03	0.86	6.68	2.92	0.01			99.2
"lngdG4	G	38.71	0.07	22.16	0.12	27.46	0.83	7.28	3.03	0.01			99.67
"lngdG4	G	41.08	0.03	17.29	8.55	7.3	0.36	20.92	3.73	0			99.26
"lngdG4	G	42.19	0.06	23.65	1.77	7.98	0.42	18.43	4.86	0			99.36
"lngdG4	G	42.73	0.09	23.2	1.63	7.91	0.29	20	4.86	0			100.71
"lngdG4	G	41.91	0.09	22.07	1.22	9.87	0.34	19.73	5.08	0			100.31
"lngdG4	G	42.46	0.07	23.96	0.83	9.47	0.33	18.67	5.08	0.02			100.89
"lngdG4	G	42.95	0.08	22.53	1.29	7.38	0.23	20.9	5.11	0			100.47
"lngdG4	G	41.84	0.05	23.36	1.2	7.35	0.24	21.38	5.12	0			100.54
"lngdG4	G	38.05	0.02	20.87	0.04	28.55	0.52	6.24	5.15	0.02			99.46
"lngdG4	G	42.32	0.02	23.34	0.43	8.42	0.28	19.9	5.27	0.02			100
"lngdG4	G	41.82	0.2	21.35	4.1	7.55	0.33	19.9	5.29	0			100.54
"lngdG4	G	41.51	0.1	23.27	0.77	10.23	0.5	17.67	5.31	0.02			99.38
"lngdG4	G	41.77	0.1	23.99	0.71	10.47	0.51	17.92	5.31	0.02			100.8
"lngdG4	G	41.09	0.01	23.72	0.93	9.55	0.5	18.08	5.33	0			99.21
"lngdG4	G	41.68	0.02	23.78	0.89	9.59	0.5	18.59	5.34	0.02			100.41
"lngdG4	G	41.68	0.13	22.65	2.8	9.62	0.41	18.36	5.34	0			100.99
"lngdG4	G	42.07	0.1	21.38	0.58	10.75	0.45	20.12	5.34	0.02			100.81
"lngdG4	G	41.65	0.02	23.1	0.74	9.93	0.41	17.86	5.36	0.02			99.09
"lngdG4	G	41.9	0.1	23.45	0.82	10.25	0.46	18.45	5.36	0.02			100.81
"lngdG4	G	41.21	0.02	24.8	0.77	10.09	0.53	17.88	5.37	0.02			100.69
"lngdG4	G	41.87	0.1	23.91	0.69	9.77	0.48	18.57	5.37	0.02			100.78
"lngdG4	G	42.65	0.1	20.09	0.73	10.92	0.38	20.2	5.37	0.02			100.46
"lngdG4	G	41.69	0.02	23.69	0.92	10.43	0.5	17.14	5.38	0.02			99.79
"lngdG4	G	41.84	0.1	23.73	0.84	10.73	0.52	17.38	5.38	0.02			100.54
"lngdG4	G	41.62	0.15	21.24	2.85	9.83	0.49	19.33	5.38	0			100.89
"lngdG4	G	41.99	0.03	23.82	0.92	9.58	0.49	17.17	5.39	0			99.39
"lngdG4	G	41.34	0.1	24.4	0.65	10.46	0.48	17.92	5.41	0.02			100.78
"lngdG4	G	41.51	0.1	23.86	0.98	10.65	0.47	17.64	5.41	0.02			100.64
"lngdG4	G	42.21	0.02	21	0.78	10.73	0.44	19.92	5.42	0.02			100.54
"lngdG4	G	41.17	0.02	23.81	0.94	9.55	0.45	17.65	5.43	0			99.02
"lngdG4	G	41.62	0.12	21.95	2.86	8.65	0.45	17.97	5.43	0			99.05
"lngdG4	G	42.01	0.02	23.58	1.14	10.53	0.49	17.7	5.44	0.02			100.93
"lngdG4	G	41.87	0.65	18.71	4.3	8.11	0.32	20.44	5.45	0			99.85
"lngdG4	G	41.9	0.03	23.48	1.04	9.77	0.48	17.15	5.46	0			99.31
"lngdG4	G	41.78	0.19	19.33	3.25	7.65	0.34	21.71	5.46	0			99.71
"lngdG4	G	41.64	0.02	24.22	0.78	9.91	0.48	17.73	5.46	0.02			100.26
"lngdG4	G	41.7	0.02	22.53	1.06	10.59	0.52	18.04	5.47	0.02			99.95
"lngdG4	G	41.53	0.02	22.71	0.85	10.77	0.44	18.67	5.47	0.02			100.48
"lngdG4	G	41.85	0.67	18.96	4.29	8.17	0.25	20.54	5.48	0			100.21
"lngdG4	G	41.67	0.68	19.02	3.94	8.12	0.24	21.57	5.48	0			100.72
"lngdG4	G	41.58	0.02	22.65	0.83	10.31	0.49	18.1	5.49	0.02			99.49
"lngdG4	G	41.34	0.1	23.7	0.97	11.01	0.52	17.68	5.49	0.02			100.83
"lngdG4	G	41.42	0.02	23.71	0.98	9.91	0.51	16.96	5.51	0			99.02
"lngdG4	G	41.16	0.03	23.6	1.14	10.24	0.48	18.05	5.51	0.02			100.23
"lngdG4	G	42.48	0.67	16.81	4.16	7.94	0.27	22.18	5.52	0			100.03
"lngdG4	G	41.85	0.02	22.47	0.87	10.51	0.45	19.2	5.53	0.02			100.92
"lngdG4	G	41.88	0.1	21.64	0.83	11.05	0.41	19.36	5.54	0.02			100.83
"lngdG4	G	41.22	0.1	23.79	0.89	10.49	0.5	18.39	5.54	0.02			100.94
"lngdG4	G	41.81	0.1	24.05	0.86	10.18	0.48	17.73	5.56	0.02			100.79
"lngdG4	G	41.56	0.03	23.53	1.19	10.3	0.52	17.79	5.56	0.02			100.5
"lngdG4	G	41.28	0.03	23.33	1.12	10.39	0.55	16.95	5.58	0.02			99.25
"lngdG4	G	41.25	0.66	19.77	5.34	8.06	0.33	19.17	5.58	0			100.16
"lngdG4	G	41.69	0.69	20.05	5.43	8.24	0.32	18.95	5.6	0			100.97
"lngdG4	G	41.86	0.1	21.24	2.52	9.82	0.38	19.26	5.61	0			100.79
"lngdG4	G	41.85	0.64	18.57	4.42	7.78	0.3	21.16	5.68	0			100.4
"lngdG4	G	41.67	1.34	19.12	5.41	7.82	0.32	18.23	5.7	0			99.61	18.62
"lngdG4	G	41.41	0.03	21.96	1.12	10.47	0.48	18.24	5.73	0.02			99.46	21.46
"lngdG4	G	39.95	0.2	21.11	0.04	23.48	0.65	8.06	6	0.02			99.51	20.61
"lngdG4	G	42.13	0.83	17.31	4.83	8.86	0.31	20.36	6.04	0			100.67	16.81
"lngdG4	G	38.69	0.22	22.47	0.06	23.54	0.59	7.7	6.05	0.02			99.34	21.97
"lngdG4	G	41.72	0.04	23.83	0.9	9.88	0.54	16.97	6.05	0			99.93	23.33
"lngdG4	G	38.95	0.39	21.91	0.05	23.4	0.51	8.24	6.16	0.03			99.64	21.41
"lngdG4	G	41.82	0.24	18.95	5.1	6.86	0.26	20.32	6.37	0			99.92	18.45
"lngdG4	G	41.83	0.27	18.31	4.89	6.59	0.28	20.69	6.46	0			99.32	17.81
"lngdG4	G	42.63	0.35	18.87	4.04	6.86	0.23	20.92	6.66	0			100.56	18.37
"lngdG4	G	41.23	0.05	19.72	3.68	8.5	0.42	19.02	6.71	0			99.33	19.22
"lngdG4	G	42.87	0.35	18.84	4.09	6.66	0.31	20.76	6.72	0			100.6	18.34
"lngdG4	G	42.03	0.34	19.25	4.04	6.83	0.25	20.19	6.73	0			99.66	18.45
"lngdG4	G	42.23	0.36	20.36	4.6	6.37	0.29	19.12	6.86	0			100.19	19.56
"lngdG4	G	41.89	0.36	20.78	4.72	5.91	0.28	18.23	7.01	0			99.18	19.98
"lngdG4	G	40.85	0.26	17.49	7.55	7.89	0.3	17.74	7.07	0			99.15	16.69
"lngdG4	G	42.01	0.35	20.13	5.17	6.56	0.25	18.46	7.1	0			100.03	18.13
"lngdG4	G	38.63	0.02	20.13	0.04	25.88	0.54	6.54	7.59	0.03			99.4	18.13
"lngdG4	G	38.35	0.05	21.2	0.04	24.61	0.43	7.09	7.68	0.03			99.48	19.2
"lngdG4	G	38.23	0.1	20.44	0.06	23.74	0.71	6.62	9.09	0.04			99.03	18.44
"lngdG4	G	39.15	0.03	22.87	0.05	20.07	2.46	3.58	11.26	0.05			99.52	20.87
LenG1-1	G	40.93	0.98	18.38	4.49	8.5	0.26	20.44	5.12	0.1	0.01		99.21
LenG1-12	G	39.53	0.04	21.99	0.06	23.85	0.42	12.76	1.26	0	0		99.91
LenG1-13	G	39.37	0.05	21.94	0.04	26.14	0.38	11.18	1.27	0.02	0		100.39
LenG1-14	G	39.32	0.04	21.92	0.04	25.37	0.35	11.8	1.1	0	0		99.94
LenG1-15	G	39.32	0.05	21.88	0.1	25.21	0.32	11.96	1.18	0.01	0		100.03
LenG1-16	G	39.24	0.02	21.84	0.05	27.2	0.69	10.28	1.39	0	0.01		100.72
LenG1-17	G	39.23	0.05	21.95	0.02	26.1	0.4	11.28	1.27	0.01	0		100.31
LenG1-18	G	39.21	0.06	21.79	0.04	25.29	0.42	11.87	1.3	0	0		99.98
LenG1-19	G	39.21	0.05	21.93	0.05	27.34	0.41	10.6	1.19	0.02	0		100.8
LenG1-20	G	39.18	0.03	21.67	0.09	24.86	0.21	9.33	5.02	0.02	0		100.41
LenG1-21	G	39.16	0.05	21.52	0.08	24.76	0.22	9.37	4.84	0.02	0.01		100.03
LenG1-22	G	39.06	0.07	21.58	0.06	25.92	0.38	11.64	1.23	0.05	0		99.99
LenG1-23	G	39.02	0.06	21.8	0.06	26	0.46	11.39	1.2	0	0		99.99
LenG1-24	G	39.02	0.04	21.71	0.07	27.43	0.5	10.19	1.2	0	0		100.16
LenG1-25	G	38.98	0.05	21.79	0.03	26.77	0.45	10.86	1.21	0	0		100.14
LenG1-26	G	38.95	0.04	21.64	0.07	25.47	0.43	11.76	1.28	0	0.01		99.65
LenG1-27	G	38.86	0.06	21.62	0.03	28.29	0.5	9.83	1.14	0.02	0		100.35
LenG1-28	G	38.83	0.07	21.17	0.05	26.24	0.67	7.77	5.66	0.02	0		100.48
LenG1-29	G	38.82	0.06	21.71	0.04	27.16	0.46	10.85	1.21	0.01	0		100.32
LenG1-30	G	38.72	0.07	21.57	0.06	25.93	0.41	11.37	1.27	0.01	0		99.41
LenG1-31	G	38.7	0.03	21.64	0.01	28.46	0.47	9.72	1.12	0.01	0		100.16
LenG1-32	G	38.65	0.04	21.52	0.05	26.53	0.46	11.28	1.25	0	0		99.78
LenG1-33	G	38.63	0.04	21.44	0.04	29.31	1.29	8.43	1.4	0.03	0.02		100.63	20.64
LenG1-34	G	38.61	0.08	20.95	0.09	26.04	0.69	7.84	5.74	0.01	0		100.05
LenG1-35	G	38.56	0.02	21.5	0.11	27.56	0.73	9.76	1.52	0	0		99.76
LenG1-36	G	38.54	0.05	21.45	0.04	29.32	0.59	9	1.3	0.06	0		100.35
LenG1-37	G	38.5	0.06	21.37	0.11	26.41	0.34	9.17	3.68	0.03	0		99.67
LenG1-38	G	38.37	0.02	21.44	0.09	26.52	0.35	9.27	3.62	0	0		99.68
LenG1-39	G	38.33	0.02	21.35	0.02	30.89	0.96	7.25	1.61	0	0		100.43
LenG1-40	G	38.26	0.06	21.27	0.03	30.24	0.71	8.27	1.32	0	0		100.16
LenG1-41	G	38.23	0.04	21.23	0.08	26.56	0.36	9.14	3.64	0.02	0		99.3	20.73
LenG1-42	G	38.18	0.05	21.18	0.11	30.08	0.89	8.03	1.5	0.02	0		100.04
LenG1-43	G	37.86	0.04	21.23	0.08	30.72	0.7	8.14	1.17	0.04	0		99.98
LenG1-44	G	37.81	0.04	20.96	0.06	30.91	0.98	7.52	1.5	0	0		99.78
LenG16 1	G	39.64	0.23	22.12	0.28	16.67	0.32	14.42	5.83	0.01	0		99.52
LenG16 10	G	41.26	0.03	22.39	0.92	10.56	0.48	19	5.48	0.01	0		100.13
LenG16 100	G	41.35	0.04	22.36	0.99	10.49	0.45	18.68	5.47	0.01	0		99.84
LenG16 101	G	41.32	0.01	22.52	0.96	10.55	0.47	18.74	5.41	0	0		99.98
LenG16 102	G	41.51	0.01	22.6	0.95	10.47	0.46	18.58	5.45	0	0.01		100.04
LenG16 103	G	40.91	0.02	21.96	1.26	10.48	0.45	18.93	5.62	0.01	0		99.64
LenG16 104	G	41.5	0.02	22.38	1.13	10.59	0.47	18.47	5.46	0.01	0		100.03
LenG16 105	G	39.99	0.01	22.07	0.27	18.74	0.34	13.21	5.72	0	0		100.35
LenG16 106	G	42.03	0.01	22.98	0.7	9.31	0.32	20.12	4.96	0.03	0		100.46
LenG16 107	G	41.49	0	22.37	1.19	10.1	0.52	18.82	5.38	0.01	0		99.88
LenG16 108	G	41.63	0.01	22.65	0.89	10.6	0.45	18.81	5.41	0	0		100.45
LenG16 109	G	41.4	0.02	22.52	0.96	10.43	0.45	18.52	5.45	0.01	0		99.76
LenG16 11	G	41.17	0.05	22.04	1.3	10.93	0.49	18.42	5.21	0.03	0		99.64
LenG16 110	G	41.63	0.01	22.49	1.21	10.52	0.45	18.6	5.56	0.02	0		100.49
LenG16 111	G	41.79	0.01	22.83	0.71	9.32	0.33	19.8	5.04	0.03	0		99.86
LenG16 112	G	41.51	0.05	20.84	3.62	8.78	0.47	19.55	5.68	0.02	0		100.52
LenG16 113	G	41.79	0.02	22.7	0.85	10.53	0.47	18.66	5.45	0	0		100.47
LenG16 114	G	40.32	0.1	22.22	0.31	17.18	0.31	13.84	5.89	0.02	0		100.19
LenG16 115	G	41.48	0.02	22.42	0.93	10.46	0.47	18.56	5.45	0.02	0		99.81
LenG16 116	G	41.45	0.02	22.46	0.92	10.57	0.46	18.71	5.44	0.01	0		100.04
LenG16 117	G	41.33	0.08	21.64	2.25	9.97	0.42	19.39	4.91	0.01	0		100
LenG16 118	G	40.44	0.13	22.45	0.28	15.62	0.31	14.9	6.01	0.01	0		100.15
LenG16 119	G	40.94	0.06	21.72	0.32	16.94	0.31	14.38	6.05	0.02	0		100.74
LenG16 12	G	41.14	0.06	20.94	3.11	9.91	0.53	18.34	5.82	0.02	0		99.87
LenG16 120	G	39.83	0.02	21.95	0.31	18.38	0.34	13.02	6.05	0.01	0		99.91
LenG16 121	G	41.75	0.03	22.81	0.82	9.58	0.32	19.99	4.77	0.01	0		100.08
LenG16 122	G	41.55	0.02	22.46	1.04	10.5	0.46	18.58	5.49	0.01	0.01		100.12
LenG16 123	G	40.15	0.07	22.16	0.32	17.54	0.31	13.61	5.94	0.03	0.01		100.14
LenG16 124	G	41.43	0.01	22.4	0.92	10.54	0.47	18.73	5.26	0	0		99.76
LenG16 13	G	41.61	0	22.54	0.99	10.43	0.48	18.75	5.43	0.01	0		100.24
LenG16 14	G	39.3	0.33	21.37	0.03	23.87	0.47	9.2	6.18	0.03	0		100.78
LenG16 15	G	40.15	0.1	22.25	0.27	17.7	0.33	13.99	5.65	0	0		100.44
LenG16 16	G	41.63	0.05	22.08	1.86	8.75	0.45	20.05	5.08	0.01	0		99.96
LenG16 17	G	41.48	0.02	22.48	1.03	10.43	0.46	18.58	5.54	0.02	0		100.04
LenG16 18	G	41.47	0.09	20.89	3.62	8.06	0.44	20.09	5.29	0.02	0		99.97
LenG16 19	G	41.52	0.03	22.34	0.99	10.43	0.48	18.72	5.42	0.03	0		99.96
LenG16 2	G	40.01	0.06	21.68	0.89	16.27	0.31	14.26	5.8	0.05	0.01		99.34
LenG16 20	G	41.29	0.03	22.42	1.02	10.53	0.47	18.8	5.5	0	0		100.06
LenG16 21	G	41.56	0.02	22.62	0.87	10.48	0.46	18.62	5.41	0.02	0		100.06
LenG16 22	G	41.46	0.1	20.79	3.65	7.95	0.41	20.03	5.35	0.04	0		99.78
LenG16 24	G	41.2	0.02	22.47	0.97	10.51	0.46	18.8	5.45	0	0		99.88
LenG16 25	G	41.23	0.02	22.6	0.86	10.38	0.47	19.05	5.41	0	0		100.02
LenG16 26	G	40.4	0.04	22.25	0.28	17.31	0.35	14.22	5.59	0.02	0		100.46
LenG16 27	G	41.53	0.02	22.61	1.03	10.51	0.48	18.44	5.49	0	0		100.11
LenG16 28	G	40.88	0.01	21.93	1.02	10.44	0.47	18.9	5.48	0.03	0		99.16
LenG16 29	G	41.57	0.03	22.48	1	10.4	0.47	18.57	5.47	0	0		99.99
LenG16 3	G	39.88	0.21	21.85	0.3	17.33	0.34	13.69	5.78	0.03	0		99.41
LenG16 30	G	41.99	0.04	17.66	9.85	6.41	0.31	21.43	1.76	0.04	0.01		99.5
LenG16 31	G	41.27	0.12	20.6	3.76	8.12	0.43	19.9	5.4	0.03	0		99.63
LenG16 32	G	41.59	0.11	20.42	4.22	7.95	0.42	19.68	5.62	0.05	0		100.06
LenG16 33	G	41.6	0.01	22.72	0.76	9.35	0.34	19.98	5.11	0.01	0		99.88
LenG16 34	G	39.99	0.29	13.62	12.45	8.67	0.37	17.76	6.52	0.06	0		99.73
LenG16 35	G	41.41	0.09	20.74	3.73	7.95	0.43	19.91	5.33	0.03	0		99.62
LenG16 36	G	41.79	0.03	22.95	0.78	9.61	0.33	19.9	4.71	0.01	0		100.11
LenG16 37	G	41.27	0.06	21.06	3.16	8.64	0.45	19.61	5.55	0.03	0		99.83
LenG16 38	G	41.01	0.04	22.02	1.15	11.06	0.48	19.05	4.73	0.02	0.01		99.57
LenG16 39	G	41.12	0.02	22.29	0.91	10.58	0.48	18.78	5.45	0.01	0		99.64
LenG16 4	G	39.85	0.07	22.21	0.27	18.77	0.38	12.87	5.79	0	0		100.21
LenG16 40	G	41.48	0.01	22.53	0.92	10.51	0.48	18.78	5.36	0.01	0		100.08
LenG16 41	G	41.49	0.03	22.51	0.97	10.52	0.47	18.68	5.38	0.01	0		100.06
LenG16 42	G	41.94	0.05	23	0.6	8.93	0.26	20.12	5.11	0.03	0		100.04	22.5
LenG16 43	G	41.63	0.1	22.7	0.71	9.06	0.28	20.36	4.86	0.03	0		99.73
LenG16 44	G	39.85	0.32	22.05	0.27	18	0.3	13.28	5.92	0	0		99.99
LenG16 45	G	41.56	0.03	22.48	0.96	10.48	0.45	18.82	5.55	0.01	0		100.34
LenG16 46	G	40.4	0.4	22.37	0.3	15.52	0.32	14.72	5.98	0.02	0		100.03
LenG16 47	G	39.72	0.11	22.08	0.3	16.66	0.33	14.32	5.93	0	0		99.45	21.58
LenG16 48	G	41.45	0.02	22.56	0.94	10.56	0.47	18.59	5.48	0.02	0		100.09
LenG16 49	G	41.28	0.09	20.65	3.58	8.07	0.43	20.17	5.32	0.05	0		99.64
LenG16 5	G	40.2	0.27	22.29	0.29	18.98	0.35	12.64	5.69	0.01	0		100.72
LenG16 50	G	41.67	0.04	22.9	0.68	9.38	0.33	20.01	5	0.02	0		100.03
LenG16 51	G	40.97	0	22.18	1.02	10.46	0.46	18.77	5.47	0.02	0		99.35
LenG16 52	G	41.68	0.13	20.52	4.17	7.84	0.38	19.84	5.6	0.05	0		100.21
LenG16 53	G	41.69	0.01	22.5	0.97	10.43	0.48	18.66	5.49	0	0		100.23
LenG16 54	G	39.98	0.16	22.09	0.23	19.64	0.38	12.31	6	0	0.01		100.8
LenG16 55	G	42.12	0.03	23.1	0.66	9.11	0.3	20.25	4.83	0.01	0		100.41
LenG16 56	G	41.85	0.06	22.99	0.45	8.97	0.27	20.2	5.11	0.03	0		99.93
LenG16 57	G	41.94	0.02	23	0.7	9.2	0.32	19.88	4.9	0.02	0		99.98
LenG16 58	G	41.5	0.01	22.53	1.11	10.47	0.46	18.56	5.47	0.01	0		100.12
LenG16 59	G	41.59	0.03	22.67	0.98	10.54	0.44	18.58	5.5	0	0		100.33
LenG16 6	G	40.49	0.05	22.29	0.31	16.95	0.31	13.79	5.96	0	0		100.15
LenG16 60	G	40.27	0.35	13.99	12.17	7.32	0.33	18.64	6.31	0.07	0.03		99.48
LenG16 62	G	39.96	0.33	13.95	12.34	8.38	0.34	18.23	6.4	0.05	0		99.98
LenG16 63	G	41.46	0.06	21.54	2.64	8.74	0.4	20.2	4.86	0.03	0		99.93
LenG16 64	G	41.23	0.02	22.47	1.2	10.62	0.46	18.09	5.35	0.02	0		99.46
LenG16 65	G	40.07	0.09	22.07	0.32	16.46	0.34	14.56	5.96	0.02	0		99.89
LenG16 66	G	40.27	0.37	14.02	12.25	7.47	0.32	18.79	6.37	0.05	0		99.91
LenG16 67	G	40.51	0.13	22.25	0.29	16.59	0.29	14.65	5.99	0	0		100.7
LenG16 68	G	41.63	0.02	22.71	0.85	9.79	0.35	19.79	4.69	0.01	0		99.84
LenG16 69	G	41.6	0.03	22.45	1.18	10.47	0.45	18.71	5.52	0.02	0		100.43
LenG16 7	G	41.43	0.02	22.42	1.17	10.52	0.48	18.16	5.56	0	0		99.76
LenG16 70	G	41.47	0.13	20.35	4.12	7.95	0.4	19.78	5.58	0.03	0		99.81
LenG16 71	G	40.71	0.27	15.64	10.25	7.46	0.35	19.5	5.74	0.06	0		99.98
LenG16 72	G	41.2	0.02	22.33	0.96	10.44	0.47	18.9	5.45	0.01	0		99.78
LenG16 73	G	40.3	0.34	14.09	12.17	7.9	0.33	18.64	6.38	0.08	0		100.23
LenG16 74	G	42.15	0	22.21	1.46	9.79	0.52	19.06	5.56	0.01	0		100.76
LenG16 75	G	41.94	0.1	19.75	5.08	7.55	0.34	20.62	5.01	0.04	0		100.43
LenG16 77	G	40.89	0.05	17.78	7.49	8.07	0.36	22.12	2.87	0.02	0		99.65
LenG16 78	G	41.65	0.04	22.44	1.22	9.37	0.34	20.07	4.98	0.02	0		100.13
LenG16 79	G	41.93	0.08	21.42	2.95	8.84	0.43	19.75	4.92	0.02	0		100.34
LenG16 8	G	39.86	0.03	21.7	0.27	20.53	0.44	11.82	5.89	0.02	0		100.56
LenG16 80	G	41.57	0.06	21.45	2.64	8.67	0.48	19.73	5.39	0.03	0.01		100.03
LenG16 81	G	41.46	0.14	19.99	4.4	8.02	0.42	19.63	5.7	0.04	0		99.8
LenG16 82	G	41.79	0.04	22.62	1.06	10.55	0.45	18.5	5.53	0	0		100.54
LenG16 83	G	41.35	0.03	22.34	1.15	10.6	0.47	18.89	5.55	0	0		100.38
LenG16 84	G	41.64	0.12	21.83	1.74	10.38	0.37	19.2	4.95	0.02	0		100.25
LenG16 85	G	41.63	0.02	22.48	1.01	10.49	0.47	18.61	5.32	0	0		100.03
LenG16 86	G	38.63	0.04	20.93	0.03	25.68	0.59	6.27	8.54	0.01	0		100.72
LenG16 87	G	41.48	0.07	20.7	3.62	8.69	0.47	19	5.8	0.02	0		99.85
LenG16 88	G	41.55	0.07	20.74	3.56	8.72	0.47	19.24	5.81	0.01	0		100.17
LenG16 89	G	41.66	0.03	22.54	0.93	10.46	0.45	18.46	5.49	0.02	0		100.04
LenG16 9	G	41.39	0.02	22.48	0.96	10.52	0.46	18.94	5.36	0.01	0		100.14
LenG16 90	G	40.26	0.01	22.4	0.37	17.72	0.33	13.81	5.92	0	0		100.82
LenG16 91	G	39.61	0.1	21.97	0.33	16.23	0.31	14.92	5.89	0.02	0		99.38
LenG16 92	G	40.57	0.11	22.35	0.3	15.78	0.33	15.14	5.96	0	0		100.54
LenG16 93	G	41.43	0.02	22.49	0.96	10.52	0.46	18.62	5.42	0.01	0.01		99.94
LenG16 94	G	41.72	0.02	22.8	0.82	10.48	0.46	18.75	5.44	0.01	0		100.5
LenG16 95	G	40.11	0.04	22.1	0.3	18.7	0.37	12.91	5.83	0	0		100.36
LenG16 96	G	41.33	0.02	22.42	0.95	10.5	0.47	18.67	5.46	0	0		99.82
LenG16 97	G	41.94	0	19.52	5.99	6.11	0.29	24.28	1.79	0.04	0		99.96
LenG16 98	G	41.5	0.03	22.62	0.87	10.55	0.47	18.78	5.43	0	0		100.25
LenG16 99	G	41.66	0.07	21.16	3.32	8.56	0.45	19.28	5.44	0.02	0		99.96
LenG-18	G	42.33	0.02	22.47	1.5	8.95	0.44	19.28	5.29	0	0.01		100.29
LenG-19	G	42.22	0	21.09	3.72	6.3	0.32	23.58	2.2	0.04	0		99.47
LenG-20	G	42.13	0	20.76	3.93	6.35	0.31	23.76	1.98	0.01	0		99.23
LenG-21	G	42.09	0.01	20.83	3.82	6.37	0.3	23.59	2.13	0.03	0		99.17
LenG-22	G	42.02	0	19.48	6.02	5.99	0.27	25.04	0.53	0	0		99.35
LenG-23	G	41.95	0.02	22.47	1.19	8.91	0.44	19.79	5.08	0	0		99.85
LenG-24	G	41.9	0.02	22.46	1.16	8.86	0.44	19.76	5.12	0.01	0		99.73
LenG-25	G	41.85	0.1	20.39	4.23	7.72	0.35	19.73	5.38	0.02	0		99.77
LenG-26	G	41.83	0	20.75	3.81	6.33	0.31	23.76	2.14	0.07	0		99
LenG-27	G	41.52	0.07	20.09	4.26	7.52	0.35	20.16	5.4	0.04	0		99.41
LenG-29	G	41.26	0.29	20.1	4.11	7.78	0.34	20.16	5.28	0.03	0		99.35
LenG-32	G	41.2	0.51	18.79	4.92	7.27	0.22	21.25	5.06	0.07	0		99.29
LenG-36	G	41.6	0.9	20.8	1.72	8.38	0.23	21.37	4.51	0.11	0		99.62
LenG4-10	G	40.42	0.5	17.51	0.01	15.55	17.96	0.33	6.97	0.18	0		99.43
LenG4-12	G	42.69	0.05	21.96	0.48	14.86	0.26	11.41	7.47	0.03	0		99.21
LenG4-15	G	42.12	0.71	18.99	4.3	7.39	0.24	20.88	4.78	0.16	0.01		99.58
LenG4-16	G	37.61	0.04	19.52	0.03	27.5	10.21	1.91	2.82	0.03	0		99.67
LenG4-17	G	37.9	0.04	19.28	0	21.52	7.91	1.31	11.3	0.06	0		99.32
LenG4-18	G	36.93	0.04	20.11	0.01	28.85	11.4	0.21	1.79	0.06	0		99.4
LenG4-19	G	37.72	0.06	19.38	0.03	22.95	6.47	1.66	11.1	0.1	0		99.47
LenG4-20	G	36.9	0.03	20.41	0	29.28	8.75	2.78	1.19	0.02	0		99.36
LenG4-21	G	42.95	0.77	21.12	1.61	8.43	0.18	20.38	4.3	0.14	0		99.88
LenG4-22	G	37.79	0.04	19.74	0.02	22.91	6.43	2.05	10.95	0.06	0		99.99
LenG4-23	G	37.73	0.22	19.36	0	22.59	8.28	0.97	10.8	0.06	0		100.01
LenG4-24	G	38.41	0	21.58	0.02	29.05	1.59	8.12	1.58	0.05	0		100.4
LenG4-25	G	41.22	0.05	22.65	0.59	15.81	0.24	12.28	7.58	0.05	0		100.47
LenG4-26	G	42.95	0.86	20.53	2.41	8.32	0.22	20.61	4.77	0.07	0		100.74
LenG4-27	G	38.63	0.01	21.67	0	29.16	1.6	8.14	1.57	0.01	0		100.79
LenG4-28	G	37.67	0.06	20.6	0.2	30.85	4.09	2.99	4.26	0.06	0		100.78
LenG4-29	G	41.15	0.89	18.85	5.47	7.16	0.24	20.11	5.37	0.08	0		99.32
LenG4-30	G	41.01	0.04	23.54	0.15	13.35	0.22	16.47	5.37	0.02	0		100.17
LenG4-31	G	39.6	0.05	22.81	0.2	17.35	0.29	13.7	4.98	0.02	0		99
LenG4-32	G	39.64	0.03	21.85	0.01	23.33	3.4	8.96	1.82	0.02	0		99.06
LenG4-33	G	38.59	0.09	21	0.06	25.83	1.43	6.65	5.4	0.03	0		99.08
LenG4-34	G	39.28	0.04	22.72	0.31	16.49	0.29	12.4	7.54	0	0		99.07
LenG4-35	G	39.06	0.1	20.78	0.4	24.78	0.9	7.13	5.9	0.06	0		99.11
LenG4-36	G	41.41	0.37	19.8	4.83	7.4	0.25	20	5	0.07	0		99.13
LenG4-37	G	37.35	0.34	19.92	0	31.35	2.06	2.77	5.36	0	0		99.15
LenG4-38	G	39.42	0.03	22.95	0.47	15.99	0.26	13.42	6.56	0.06	0		99.16
LenG4-39	G	39.67	0.03	22.97	0.16	16.31	0.28	13.44	6.28	0	0.01		99.15
LenG4-40	G	38.1	0.15	20.37	0.01	25.27	4.68	2.55	7.99	0.04	0		99.16
LenG4-41	G	38	0.1	20.67	0.02	28.61	1.23	3.63	6.91	0.03	0		99.2
LenG4-42	G	39.71	0.06	23.31	0.13	15.84	0.26	14.76	5.14	0.02	0		99.23
LenG4-43	G	40.38	0.05	22.44	0.04	21.7	0.32	13.75	0.59	0.01	0		99.28
LenG4-44	G	39.55	0.05	22.93	0.29	15.52	0.27	12.36	8.26	0.05	0		99.28
LenG4-45	G	39.44	0.04	22.98	0.25	16.56	0.28	13.3	6.4	0.03	0		99.28
LenG4-46	G	36.92	0	20.36	0.02	34.32	5.62	1.3	0.7	0.08	0		99.32
LenG4-47	G	39.98	0.01	23.29	0.36	15.49	0.33	15.23	4.59	0.05	0		99.33
LenG4-48	G	39.05	0.03	21.39	0.02	27.61	1.46	8.27	1.48	0.03	0		99.34
LenG4-49	G	39.06	0.06	22.72	0.81	18.74	0.31	12.36	5.32	0.03	0		99.41
LenG4-50	G	39.2	0.01	21.74	0.01	25.74	1.04	9.35	2.3	0.03	0		99.42
LenG4-51	G	39.21	0.02	21.57	0.02	26.18	1.21	8.64	2.57	0	0		99.42
LenG4-52	G	39.91	0.04	23.24	0.33	15.51	0.25	14.82	5.29	0.04	0		99.43
LenG4-53	G	39.84	0.04	21.92	0.02	24.43	1.53	10.1	1.57	0.03	0		99.48
LenG4-54	G	39.99	0.06	23.18	0.1	15.27	0.24	13.76	6.9	0.03	0		99.53
LenG4-55	G	39.56	0.05	22.88	0.23	17.34	0.29	13.46	5.72	0.03	0		99.56
LenG4-56	G	39.72	0.04	23.1	0.3	16.21	0.27	13.66	6.28	0.01	0		99.59
LenG4-57	G	39.77	0.06	23.12	0.13	16.31	0.26	12.39	7.54	0.01	0		99.59
LenG4-58	G	39.58	0.07	23	0.32	17.94	0.3	13.47	4.88	0.05	0		99.61
LenG4-59	G	37.84	0.09	20.37	0.06	29.82	1.04	3.02	7.37	0.02	0		99.63
LenG4-60	G	38.75	0.1	20.85	0.02	26.55	0.81	5.21	7.32	0.04	0		99.65
LenG4-61	G	38.92	0.13	21.15	0	22.7	0.63	4.64	11.44	0.03	0		99.64
LenG4-62	G	39.19	0.03	22.83	1.42	16.58	0.28	12.9	6.41	0.02	0		99.66
LenG4-63	G	39.34	0.16	21.46	0.06	24.68	0.57	7.54	5.81	0.03	0		99.65
LenG4-64	G	39.82	0.05	23.28	0.08	14.89	0.24	13.13	8.16	0.01	0		99.66
LenG4-65	G	39.73	0.06	23.11	0.16	16.97	0.29	13.47	5.86	0.03	0		99.68
LenG4-66	G	39.48	0.05	22.98	0.06	16.37	0.24	11.45	9	0.05	0		99.68
LenG4-67	G	39.8	0.03	23.15	0.14	15.65	0.24	12.7	7.94	0.04	0		99.69
LenG4-68	G	40.2	0.03	23.34	0.42	14.73	0.25	15.03	5.66	0.03	0		99.69
LenG4-69	G	36.97	0.07	19.86	0	34.77	2.21	0.19	5.56	0.06	0		99.69
LenG4-70	G	37.63	0.05	20.55	0.01	32.13	1.43	2.4	5.46	0.02	0		99.68
LenG4-71	G	39.07	0.05	21.18	0.09	27.97	0.58	7.62	3.12	0.02	0		99.7	20.68
LenG4-72	G	39.59	0.08	23	0.26	18.17	0.25	13.63	4.66	0.06	0		99.7
LenG4-73	G	39.66	0.05	22.97	0.16	16.31	0.25	12.61	7.69	0.01	0		99.71
LenG4-74	G	39.77	0.05	23.11	0.12	16.74	0.31	13.76	5.86	0.01	0		99.73
LenG4-9	G	41.82	0.69	16.14	18.66	5.39	0.21	11.37	4.43	0.32	0.03		99.06
lngdG001	G	41.63	0.05	17.21	9.86	6.25	0.38	22.08	1.84				99.3
lngdG002	G	42.07	0.01	18.48	7.75	6.51	0.37	22.78	1.34				99.31	17.98
lngdG003	G	42.23	0.05	18.03	6.6	7.66	0.42	21.31	2.86				99.16
lngdG004	G	43.09	0	20.83	5.92	5.78	0.31	21.51	1.81				99.25
lngdG005	G	40.57	0.28	14.2	12.8	8.52	0.38	16.24	6.41				99.4
lngdG006	G	40.74	0.34	14.34	12.61	7.37	0.39	18.34	6.41				100.54
lngdG007	G	40.35	0.35	14.2	12.47	7.51	0.33	17.98	6.26				99.45
lngdG008	G	40.44	0.29	14.72	12.33	8.25	0.44	17.3	6.39				100.16
lngdG009	G	39.98	0.31	14.01	12.31	8.47	0.39	17.23	6.38				99.08
lngdG010	G	40.82	0.35	13.79	12.19	7.91	0.39	17.46	6.42				99.33
lngdG011	G	40.38	0.36	15.22	12.14	6.63	0.42	18.06	6.36				99.57
lngdG012	G	40.69	0.34	14.51	12.09	7.41	0.45	17.4	6.33				99.22
lngdG013	G	40.52	0.31	14.6	12.07	8.27	0.4	16.78	6.38				99.33
lngdG014	G	40.35	0.35	14.12	12.06	7.29	0.38	18.42	6.26				99.23
lngdG015	G	40.46	0.35	14.99	12.05	7.09	0.39	17.53	6.31				99.17
lngdG016	G	40.74	0.33	14.1	12	8.05	0.47	17.36	6.3				99.35
lngdG017	G	40.81	0.37	14.31	11.93	6.76	0.35	18.82	6.29				99.64
lngdG018	G	40.65	0.33	12.76	11.71	7.46	0.38	19.68	6.36				99.33
lngdG019	G	41.07	0.35	13.22	11.58	6.58	0.4	19.96	6.17				99.33
lngdG020	G	40.48	0.28	14.98	11.55	8.15	0.42	16.98	6.38				99.22
lngdG021	G	40.88	0.33	14.31	11.54	7.87	0.41	18.56	6.29				100.19
lngdG022	G	41.11	0.35	13.14	11.51	6.39	0.4	20.32	6.24				99.46
lngdG023	G	40.82	0.35	14.81	11.49	6.61	0.37	18.68	6.09				99.22	12.81
lngdG024	G	40.8	0.34	14.35	11.26	7.92	0.36	17.92	6.24				99.19
lngdG025	G	41.69	0.38	15.51	11.16	6.42	0.33	17.6	6.06				99.15
lngdG026	G	40.98	0.32	15.69	11.12	7.38	0.4	17.33	6.33				99.55
lngdG027	G	40.98	0.27	15.34	10.25	7.07	0.36	19.6	5.58				99.45
lngdG028	G	40.72	0.3	15.39	10.24	7.16	0.39	19.71	5.81				99.72
lngdG029	G	41.25	0.3	15.12	10.1	7.17	0.37	19.45	5.66				99.42
lngdG030	G	40.69	0.25	14.89	9.89	6.98	0.44	20.38	5.74				99.26
lngdG031	G	41.66	0.25	15.61	9.87	7.2	0.37	18.84	5.68				99.48
lngdG032	G	41	0.26	17.32	9.72	7.06	0.37	18.59	5.68				100
lngdG033	G	41.75	0.29	15.32	9.53	6.86	0.47	19.48	5.54				99.24
lngdG034	G	41.5	0.27	16.41	8.92	6.88	0.34	19.28	5.71				99.31
lngdG035	G	42.03	0.32	15.71	7.97	8.66	0.46	17.69	6.79				99.63
lngdG036	G	41.74	0.12	19.25	5.12	7.34	0.34	21.22	4.96				100.09
lngdG037	G	41.62	0.12	19.99	4.89	7.13	0.33	20.21	4.94				99.23
lngdG038	G	42.16	0.09	21.21	4.24	7.14	0.33	19.19	5.06				99.42
lngdG039	G	42.07	0.43	19.43	4.14	6.94	0.4	21.72	4.55				99.68
lngdG040	G	41.8	0.4	19.95	4.09	7.38	0.37	21.14	4.54				99.67
lngdG041	G	41.89	0.41	18.09	3.99	7.3	0.38	22.55	4.39				99
lngdG042	G	41.47	0.36	19.31	3.95	7.39	0.35	21.87	4.63				99.33
lngdG043	G	41.97	0.13	20.18	4.26	7.58	0.49	19.15	5.75				99.51
lngdG044	G	41.56	0.13	20.81	4.21	7.62	0.44	18.88	5.66				99.31
lngdG045	G	41.83	0.12	21.23	4.11	7.69	0.48	19.04	5.51				100.01
lngdG046	G	42.3	0.14	19.49	4.06	7.71	0.48	19.58	5.73				99.49
lngdG047	G	41.53	0.12	20.42	4.05	7.59	0.43	19.82	5.59				99.55
lngdG048	G	42.48	0.09	21.71	3.83	7.58	0.48	19.21	5.45				100.83
lngdG049	G	41.75	0.09	20.65	3.76	7.72	0.5	19.55	5.55				99.57
lngdG050	G	41.75	0.08	19.5	3.73	7.9	0.49	20.74	5.51				99.7
lngdG051	G	41.38	0.08	20.63	3.67	8.81	0.49	19.12	5.98				100.16
lngdG052	G	41.67	0.09	20.74	3.65	7.88	0.51	19.21	5.45				99.2
lngdG053	G	41.83	0.09	20.6	3.61	8.06	0.53	20.25	5.31				100.28
lngdG054	G	41.98	0.07	22.56	3.59	8.31	0.61	17.35	5.79				100.26
lngdG055	G	41.63	0.08	20.74	3.54	9.29	0.61	17.83	5.63				99.35
lngdG056	G	42.41	0.08	21.64	3.53	7.88	0.51	18.47	5.45				99.97
lngdG057	G	42.05	0.1	21.85	3.43	7.64	0.47	18.73	5.44				99.71
lngdG058	G	41.63	0.09	21.04	3.4	7.97	0.49	19.1	5.36				99.08
lngdG059	G	41.72	0.08	20.73	3.38	8.61	0.55	19.15	5.59				99.81
lngdG060	G	41.44	0.03	20.64	3.33	9.31	0.55	18.61	5.79				99.7
lngdG061	G	42.16	0.09	21.71	3.31	8.52	0.49	18.24	5.05				99.57
lngdG062	G	41.76	0.07	19.62	3.23	8.44	0.52	20.06	5.5				99.2
lngdG063	G	42.13	0.05	19.66	3.23	8.79	0.61	19.59	5.51				99.57
lngdG064	G	42.12	0.08	18.73	3.2	8.29	0.58	21.12	5.58				99.7
lngdG065	G	42.56	0.08	20.86	3.19	8.34	0.56	18.19	5.5				99.28
lngdG066	G	42.22	0.08	20.16	3.17	8.02	0.52	19.96	5.2				99.33
lngdG067	G	41.59	0.06	20.72	3.17	9.65	0.62	18.55	5.85				100.21
lngdG068	G	41.98	0.07	21.63	3.16	7.91	0.49	18.61	5.84				99.69	21.13
lngdG069	G	41.94	0.05	20.85	3.15	8.41	0.51	18.84	5.61				99.36
lngdG070	G	42.26	0.07	20.49	3.14	8.03	0.5	19.36	5.41				99.26
lngdG071	G	41.88	0.06	21.02	3.04	8.23	0.57	19.24	5.6				99.64
lngdG072	G	42.08	0.09	21.24	3.01	8.37	0.53	18.62	5.49				99.43
lngdG073	G	41.02	0.05	21.35	3	9.46	0.55	17.88	5.96				99.27
lngdG074	G	42.36	0.06	21.47	2.98	8.43	0.57	19.05	5.55				100.47
lngdG075	G	42.31	0.06	21.35	2.83	7.61	0.47	19.2	5.76				99.59
lngdG076	G	42.28	0.07	21.54	2.82	7.94	0.52	18.34	5.61				99.12
lngdG077	G	42.3	0.05	20.75	2.78	8.17	0.58	19.12	5.54				99.29
lngdG078	G	41.83	0.08	22	2.73	8.44	0.48	18	5.47				99.03
lngdG079	G	41.96	0.07	21.61	2.63	8.48	0.44	19.38	4.97				99.54
lngdG080	G	41.85	0.06	21	2.61	8.44	0.52	19.34	5.63				99.45
lngdG081	G	42.15	0.06	21.87	2.52	8.47	0.42	19.99	5.01				100.49
lngdG082	G	41.91	0.04	22.54	2.2	8.44	0.49	18.92	5.31				99.85
lngdG083	G	41.38	0.07	23.09	2.1	8.22	0.49	19.38	5.04				99.77
lngdG084	G	42.44	0.04	23.19	2.04	8.55	0.55	17.8	5.01				99.62
lngdG085	G	41.68	0.08	19.47	2.02	9.21	0.58	21.79	4.84				99.67
lngdG086	G	42.2	0.06	20.97	1.96	8.16	0.53	20.14	4.98				99
lngdG087	G	42.01	0.02	22.54	1.85	9.44	0.46	18.46	5.04				99.82	22.04
lngdG088	G	42.15	0.06	21.66	1.82	8.47	0.56	19.78	4.87				99.37
lngdG089	G	42.02	0.04	22.79	1.67	7.91	0.43	21.43	4.2				100.49
lngdG090	G	42.03	0.02	21.58	1.62	9.16	0.41	19.44	5.09				99.35
lngdG091	G	42.36	0.11	22.99	1.54	9.95	0.42	17.44	4.91				99.72
lngdG092	G	41.59	0.07	23.23	1.53	9.44	0.58	19.09	4.94				100.47
lngdG093	G	41.87	0.04	22.93	1.49	8.29	0.38	19.7	4.39				99.09
lngdG094	G	42.9	0.05	23.07	1.45	7.26	0.39	20.03	4.38				99.53
lngdG095	G	41.89	0.04	22.04	1.43	9.62	0.51	19.8	4.98				100.31
lngdG096	G	42.21	0.06	23.21	1.39	8.34	0.41	20.12	4.21				99.95
lngdG097	G	42.3	0.07	21.93	1.39	8.19	0.35	20.8	4.21				99.24
lngdG098	G	42.46	0.07	22.13	1.33	8.34	0.35	20.21	4.38				99.27
lngdG099	G	42.04	0.03	22.32	1.36	9.07	0.62	18.31	5.51				99.26
lngdG100	G	42.18	0	22.95	1.3	8.45	0.53	18.12	5.54				99.07
lngdG101	G	41.29	0.02	21.48	1.25	10.3	0.56	18.71	5.62				99.23
lngdG102	G	42.18	0.03	22.9	1.24	9.1	0.6	17.34	5.99				99.38
lngdG103	G	41.96	0.01	21.92	1.19	9.46	0.5	19.07	5.38				99.49
lngdG104	G	43.06	0.02	21.68	1.18	9.51	0.61	17.96	5.42				99.44
lngdG105	G	41.03	0.01	22.41	1.17	10.05	0.54	18.35	5.62				99.18
lngdG106	G	42.26	0.02	23.15	1.16	10.01	0.59	18	5.64				100.83
lngdG107	G	41.85	0.02	24.67	1.15	9.99	0.54	17.13	5.63				100.98
lngdG108	G	42.04	0.01	22.96	1.15	9.99	0.55	17.18	5.72				99.6
lngdG109	G	42.29	0.03	21.34	1.13	9.18	0.56	19.64	5.4				99.57
lngdG110	G	41.6	0.01	21.7	1.13	10.14	0.55	19.01	5.54				99.68
lngdG111	G	42.29	0	23.29	1.13	8.7	0.55	18.12	5.59				99.67
lngdG112	G	42.38	0.05	24.57	1.12	8.78	0.4	18.27	5.19				100.76
lngdG113	G	41.48	0.03	22.4	1.12	10.28	0.59	18.23	5.51				99.64
lngdG114	G	41.55	0	22.52	1.1	9.77	0.65	18.35	5.36				99.3
lngdG115	G	41.72	0.03	22.94	1.1	10.06	0.51	17.39	5.53				99.28
lngdG116	G	42.19	0	24	1.1	9.39	0.51	17.53	5.55				100.27
lngdG117	G	42.65	0.01	20.82	1.09	9.09	0.66	19.59	5.31				99.22
lngdG118	G	41.81	0.01	22.06	1.09	10.34	0.57	17.85	5.55				99.28
lngdG119	G	41.6	0.11	22.64	1.08	10.79	0.54	17.96	4.53				99.25
lngdG120	G	41.46	0.03	21.96	1.08	9.67	0.58	19.51	5.47				99.76
lngdG121	G	41.96	0.03	20.58	1.08	10.3	0.6	19.03	5.52				99.1
lngdG122	G	42.36	0.02	21.76	1.07	9.84	0.64	18.38	5.17				99.24
lngdG123	G	42.26	0.03	22.53	1.07	9.68	0.56	17.51	5.45				99.09
lngdG124	G	42.06	0.02	22.01	1.07	10.03	0.56	18.25	5.54				99.54
lngdG125	G	42.03	0.01	22.44	1.06	10.03	0.55	17.53	5.46				99.11
lngdG126	G	42.1	0.04	23.35	1.05	9.54	0.57	17.19	5.45				99.29
lngdG127	G	42.14	0.03	23.28	1.05	10.14	0.48	18.29	5.49				100.9
lngdG128	G	41.41	0.03	23.11	1.05	10.18	0.54	17.43	5.55				99.3
lngdG129	G	42.18	0.03	20.61	1.04	10.46	0.54	20.12	5.47				100.45
lngdG130	G	42.05	0.02	22.16	1.04	9.44	0.54	18.71	5.49				99.45
lngdG131	G	41.81	0.03	23.26	1.04	10.25	0.5	17.32	5.52				99.73
lngdG132	G	42.22	0.01	22.91	1.04	10.16	0.56	16.84	5.56				99.3
lngdG133	G	42.74	0.02	19.24	1.04	9.84	0.55	20.12	5.57				99.12
lngdG134	G	42.04	0.02	23.23	1.04	8.84	0.54	17.99	5.59				99.29
lngdG135	G	41.28	0.07	22.47	1.03	10.87	0.58	18.68	4.64				99.62
lngdG136	G	42.19	0.02	20.57	1.03	10.15	0.62	19.45	5.46				99.49
lngdG137	G	41.87	0.01	22.45	1.03	9.53	0.46	18.08	5.58				99.01	21.95
lngdG138	G	41.98	0.02	23.39	1.03	10.01	0.52	17.1	5.58				99.63
lngdG139	G	41.97	0.01	22.26	1.02	10.12	0.56	18.35	5.38				99.67
lngdG140	G	41.89	0.02	22.32	1.02	10.18	0.55	18.25	5.43				99.66
lngdG141	G	41.88	0.01	22.71	1.02	10.2	0.53	17.17	5.6				99.12
lngdG142	G	42.52	0.04	22.7	1.01	8.75	0.5	19.09	5.11				99.72
lngdG143	G	41.21	0.01	21.7	1.01	9.87	0.47	19.28	5.48				99.03
lngdG144	G	41.74	0.02	21.39	1.01	10.43	0.58	18.57	5.52				99.26
lngdG145	G	41.89	0.03	22.48	1.01	10.22	0.6	17.72	5.56				99.51
lngdG146	G	42.29	0.01	22.7	1.01	9.43	0.56	18.05	5.66				99.71
lngdG147	G	41.51	0.03	22.95	1	10.1	0.51	17.77	5.24				99.11
lngdG148	G	42.85	0.01	23.41	1	8.64	0.6	18.01	5.47				99.99
lngdG149	G	41.98	0.03	21.42	1	10.02	0.62	19.52	5.47				100.06
lngdG150	G	41.85	0.02	22.21	1	10.12	0.54	18.21	5.5				99.45
lngdG151	G	41.3	0.01	21.71	0.99	10.15	0.54	18.74	5.59				99.03
lngdG152	G	43.12	0.01	23.95	0.99	8.81	0.52	17.37	4.91				99.68
lngdG153	G	41.8	0.02	21.89	0.99	10.28	0.57	18.43	5.54				99.52
lngdG154	G	41.76	0.01	23.3	0.99	10.3	0.54	17.84	5.53				100.27	22.8
lngdG155	G	42.13	0.02	21.42	0.99	10.08	0.58	18.75	5.4				99.37	20.92
lngdG156	G	42.14	0.04	22.08	0.98	10.69	0.59	19.52	4.56				100.6
lngdG157	G	41.86	0.02	23.49	0.98	9.64	0.54	17.27	5.5				99.3
lngdG158	G	42.26	0.02	21.93	0.98	10.17	0.54	18.16	5.62				99.68
lngdG159	G	42.32	0.03	21.99	0.98	9.99	0.53	18.33	5.49				99.66
lngdG160	G	41.64	0.03	23.08	0.98	10.11	0.51	17.84	5.5				99.69
lngdG161	G	41.9	0.05	23.04	0.98	9.22	0.43	18.51	5.07				99.2
lngdG162	G	42.07	0.03	20.58	0.98	10.3	0.59	19.55	5.45				99.55	19.78
lngdG163	G	42.04	0.03	22.95	0.98	9.5	0.53	17.73	5.41				99.17
lngdG164	G	42.64	0.03	20.88	0.98	10.36	0.59	18.39	5.42				99.29
lngdG165	G	42.44	0.02	21.99	0.97	9.8	0.61	18.11	5.54				99.48
lngdG166	G	42.74	0.01	22.42	0.97	9.21	0.55	18.09	5.57				99.56
lngdG167	G	42.59	0.04	20.37	0.97	9.47	0.61	19.81	5.41				99.27
lngdG168	G	41.9	0.01	21.14	0.97	9.37	0.58	19.78	5.58				99.33	20.34
lngdG169	G	42.3	0.02	22.81	0.97	10.43	0.52	17.92	5.57				100.54
lngdG170	G	41.62	0.03	23.15	0.96	10.08	0.56	17.5	5.51				99.41
lngdG171	G	42	0.02	23.73	0.96	10.37	0.53	16.98	5.4				99.99
lngdG172	G	41.51	0.02	22.87	0.96	10.15	0.58	17.78	5.4				99.27
lngdG173	G	42.26	0.03	23.73	0.96	8.98	0.48	18.49	5.38				100.31
lngdG174	G	42.04	0.02	22.7	0.96	10.29	0.56	17.67	5.46				99.7
lngdG175	G	42.17	0.02	22.02	0.96	9	0.63	18.88	5.55				99.23	21.52
lngdG176	G	41.72	0.02	23.62	0.96	10.24	0.55	17.36	5.56				100.03
lngdG177	G	41.76	0.01	22.83	0.95	9.83	0.46	17.99	5.5				99.33
lngdG178	G	42.45	0.01	23.71	0.95	10.12	0.55	17.54	5.54				100.87
lngdG179	G	41.68	0.03	21.84	0.95	10.28	0.58	18.81	5.45				99.62
lngdG180	G	41.85	0.01	21.87	0.95	9.06	0.59	19.21	5.61				99.15
lngdG181	G	42.06	0.01	21.83	0.95	9.21	0.57	19.18	5.49				99.3
lngdG182	G	42.2	0.02	22.43	0.94	10.1	0.5	18.35	5.57				100.11
lngdG183	G	41.22	0.03	23.42	0.94	10.02	0.51	18.1	5.34				99.58
lngdG184	G	42.52	0	22.91	0.94	8.16	0.55	19.08	5.41				99.57
lngdG185	G	41.57	0.02	23.49	0.94	9.23	0.54	18.98	5.43				100.2
lngdG186	G	42.26	0.01	21.7	0.94	10	0.52	18.33	5.53				99.29
lngdG187	G	41.86	0.02	22.43	0.93	9.44	0.55	18.98	5.38				99.59
lngdG188	G	42.16	0.02	23.44	0.93	10.12	0.56	17.87	5.68				100.78
lngdG189	G	42.35	0.03	22.52	0.93	10.04	0.54	17.87	5.43				99.71
lngdG190	G	41.93	0.02	22.44	0.93	10.1	0.54	17.97	5.44				99.37
lngdG191	G	42.32	0.03	23.27	0.93	10.23	0.57	17.11	5.49				99.95
lngdG192	G	41.71	0.02	23.94	0.93	9.03	0.45	17.73	5.61				99.42
lngdG193	G	42.1	0.03	21.67	0.93	9.89	0.56	18.82	5.47				99.47
lngdG194	G	41.99	0.04	22.61	0.92	9.89	0.58	18.24	5.28				99.55
lngdG195	G	41.82	0.08	22.79	0.92	10.31	0.55	18.01	4.66				99.14
lngdG196	G	42.01	0.02	24.02	0.92	9.47	0.54	17.77	5.45				100.2
lngdG197	G	42.56	0.02	22.64	0.92	10.29	0.56	18.13	5.55				100.67
lngdG198	G	42.21	0.01	23.37	0.92	10.03	0.52	16.77	5.51				99.34
lngdG199	G	42.07	0.01	22.95	0.92	9.57	0.56	17.54	5.5				99.12
lngdG200	G	42.16	0.03	21.15	0.92	10.14	0.61	18.79	5.44				99.24
lngdG201	G	41.47	0.01	22.72	0.92	10.25	0.5	18.48	5.59				99.94
lngdG202	G	42.33	0.03	21.08	0.91	9.99	0.57	19.02	5.41				99.34
lngdG203	G	42.28	0.03	22.52	0.91	9.99	0.53	17.91	5.47				99.64
lngdG204	G	41.89	0.02	23.98	0.9	9.11	0.53	17.89	5.28				99.6
lngdG205	G	41.83	0.03	23.59	0.9	9.72	0.6	16.96	5.41				99.04
lngdG206	G	41.78	0.02	23.09	0.9	10.22	0.55	17.07	5.38				99.01
lngdG207	G	41.36	0.02	23.24	0.9	9.54	0.52	17.98	5.5				99.06
lngdG208	G	42.21	0.02	23.58	0.89	9.89	0.46	16.58	5.42				99.05	23.08
lngdG209	G	42.89	0.02	23.45	0.89	8.75	0.42	17.48	5.57				99.47
lngdG210	G	42.27	0.03	22.15	0.89	9.38	0.49	18.23	5.65				99.09
lngdG211	G	42.12	0.02	22.62	0.88	10.03	0.55	17.56	5.5				99.28
lngdG212	G	42.03	0.03	23.8	0.88	9.7	0.52	18.16	5.49				100.61
lngdG213	G	42.22	0.03	21.67	0.88	9.18	0.58	19.76	5.34				99.66
lngdG214	G	41.88	0.02	23.44	0.88	10.29	0.58	16.83	5.51				99.43
lngdG215	G	41.71	0.01	22.85	0.88	10.17	0.53	18.37	5.51				100.03
lngdG216	G	42.18	0.02	21.73	0.88	9.56	0.48	19.4	5.4				99.65
lngdG217	G	42.67	0.02	22.7	0.88	9.02	0.56	17.87	5.51				99.23
lngdG218	G	41.74	0.01	23.16	0.87	9.41	0.55	18.11	5.59				99.44
lngdG219	G	42.09	0.02	21.75	0.87	9.71	0.59	18.76	5.37				99.16	20.95
lngdG220	G	42.07	0.02	24.16	0.87	10.26	0.51	17.28	5.57				100.74
lngdG221	G	41.81	0.04	23.57	0.87	9.43	0.5	17.86	5.64				99.72
lngdG222	G	42.33	0.03	22.7	0.86	9.86	0.61	17.85	5.43				99.67
lngdG223	G	42.07	0.03	21.17	0.86	9.63	0.54	19.55	5.45				99.3
lngdG224	G	42.22	0.04	23.32	0.86	10.21	0.57	18.44	4.83				100.49
lngdG225	G	41.87	0.02	23.53	0.85	10.16	0.53	17.42	5.49				99.87
lngdG226	G	42.25	0.03	21.82	0.85	10.02	0.48	19.03	5.38				99.86
lngdG227	G	42.17	0.02	22.08	0.85	10.03	0.55	18.71	5.28				99.69
lngdG228	G	42.18	0.02	23.02	0.85	9.31	0.5	17.97	5.51				99.36
lngdG229	G	41.8	0.01	22.2	0.85	10.09	0.55	18.63	5.48				99.61
lngdG230	G	42.19	0.01	22.51	0.85	9.79	0.5	18	5.4				99.25
lngdG231	G	41.82	0.03	21.79	0.85	10.26	0.55	18.68	5.46				99.44
lngdG232	G	42.09	0	22.91	0.85	10.2	0.55	17.14	5.39				99.13
lngdG233	G	41.6	0.02	23.91	0.84	10.01	0.62	17.17	5.28				99.45
lngdG234	G	42.46	0.02	22.63	0.84	9.76	0.53	17.72	5.36				99.32
lngdG235	G	41.91	0.01	23.94	0.84	10.03	0.49	17.17	5.32				99.71
lngdG236	G	42.34	0.02	23.65	0.83	9.94	0.48	16.69	5.24				99.19	23.15
lngdG237	G	42.34	0.03	21.08	0.83	9.66	0.58	19.4	5.31				99.23	19.08
lngdG238	G	42.16	0.03	23.89	0.83	10.24	0.56	17.16	5.45				100.32
lngdG239	G	41.97	0.03	22.89	0.82	9.66	0.48	18.02	5.46				99.33
lngdG240	G	41.93	0.02	20.84	0.82	9.23	0.54	20.4	5.35				99.13
lngdG241	G	41.62	0.03	23.75	0.82	10.12	0.57	17.26	5.37				99.54
lngdG242	G	42.8	0.04	22.63	0.81	9.43	0.4	18.45	4.76				99.32
lngdG243	G	42.8	0.02	23.28	0.81	9.19	0.43	17.36	5.53				99.42
lngdG244	G	42	0.01	22.35	0.81	10.07	0.55	18.1	5.41				99.3
lngdG245	G	42.09	0.06	22.38	0.8	7.56	0.27	21.44	4.99				99.59
lngdG246	G	41.52	0.02	22.74	0.8	10.1	0.51	18.7	5.44				99.83
lngdG247	G	42.31	0.01	23.21	0.79	10.06	0.48	18.32	5.41				100.59
lngdG248	G	42.28	0.02	23.43	0.79	7.83	0.42	19.72	4.7				99.19
lngdG249	G	42.11	0.03	23.74	0.79	10.59	0.6	17.91	5.14				100.91
lngdG250	G	41.81	0.03	22.62	0.79	9.26	0.49	19.03	5.5				99.53
lngdG251	G	41.99	0.02	23.77	0.79	10.33	0.57	16.57	5.3				99.34
lngdG252	G	42.46	0.02	23.86	0.79	9.22	0.51	17.52	5.54				99.92
lngdG253	G	41.49	0.01	22.02	0.78	9.8	0.53	18.96	5.53				99.12
lngdG254	G	42.22	0.03	23.99	0.77	9.08	0.51	17.38	5.43				99.41	23.49
lngdG255	G	41.93	0.02	23.06	0.77	9.48	0.53	17.91	5.59				99.29
lngdG256	G	41.83	0.03	22.56	0.77	9.6	0.54	18.65	5.23				99.21
lngdG257	G	42.4	0.01	22.77	0.77	10.44	0.56	17.07	5.44				99.46	22.27
lngdG258	G	42.22	0.02	23.24	0.77	9.44	0.43	19.08	4.76				99.96
lngdG259	G	42.45	0.02	23.26	0.77	9.38	0.53	17.67	5.32				99.4
lngdG260	G	41.58	0.03	21.74	0.76	10.21	0.56	18.94	5.52				99.34
lngdG261	G	42.15	0.04	22.12	0.76	9.43	0.54	18.56	5.43				99.03
lngdG262	G	42.1	0.02	24.32	0.76	9	0.46	17.71	5.61				99.98
lngdG263	G	42.67	0.02	22.6	0.76	8.39	0.54	19.15	5.38				99.51
lngdG264	G	42.29	0.01	21.84	0.75	10.24	0.51	19.57	5.49				100.7
lngdG265	G	42.38	0.01	24.22	0.75	10.16	0.56	17.21	5.41				100.7
lngdG266	G	41.55	0	23.33	0.74	9.48	0.58	18.09	5.63				99.4
lngdG267	G	42.43	0.03	24.19	0.73	8.76	0.48	17.2	5.45				99.27
lngdG268	G	42.15	0.02	22.13	0.73	9.97	0.53	19.21	5.63				100.37	21.63
lngdG269	G	42.04	0.04	23.22	0.72	8.64	0.29	19.55	4.87				99.37
lngdG270	G	42.38	0.03	23.58	0.71	8.72	0.35	18.9	4.91				99.58
lngdG271	G	42.28	0.07	22.29	0.7	10.46	0.5	18.07	4.95				99.32
lngdG272	G	42.74	0.04	23.29	0.7	8.58	0.3	20.15	4.97				100.77
lngdG273	G	41.97	0.04	23.74	0.69	10.23	0.54	17.85	5.51				100.57	21.74
lngdG274	G	42.26	0.02	23.99	0.69	8.91	0.33	18.58	4.91				99.69
lngdG275	G	42.76	0.03	23.46	0.69	9.02	0.34	19.52	4.9				100.72
lngdG276	G	42.52	0.02	23.29	0.68	8.65	0.44	18.9	5.51				100.01
lngdG277	G	42.3	0.03	22.5	0.68	9.52	0.54	18.74	5.35				99.66
lngdG278	G	42.65	0.04	23.62	0.65	8.54	0.33	19.99	4.97				100.79
lngdG279	G	42.3	0.02	22.46	0.63	10.23	0.55	19.01	5.46				100.66
lngdG280	G	42.13	0.03	23.5	0.63	10	0.56	17.76	5.57				100.18
lngdG281	G	41.91	0.02	22.15	0.63	8.45	0.35	20.29	5.2				99
lngdG282	G	42.53	0.02	23	0.63	9.01	0.33	19.83	4.98				100.33	22.2
lngdG283	G	42.31	0.01	22.79	0.63	9.59	0.54	17.97	5.56				99.4
lngdG284	G	42.36	0.02	24.78	0.62	9.01	0.39	18.66	5.11				100.95
lngdG285	G	42.45	0.03	23.65	0.59	9.79	0.54	18.21	5.45				100.71
lngdG286	G	42.69	0.01	23.18	0.59	8.46	0.43	18.43	5.59				99.38
lngdG287	G	42.32	0.04	22.11	0.58	8.46	0.37	20.63	4.85				99.36
lngdG288	G	42.49	0.03	23.62	0.56	7.85	0.27	19.25	4.96				99.03
lngdG289	G	42.38	0.02	23.2	0.53	8.62	0.47	18.65	5.52				99.39
lngdG290	G	42.71	0.03	24.68	0.52	8.39	0.33	18.96	5.1				100.72
lngdG291	G	42.44	0.02	23.4	0.52	9.93	0.56	17.44	5.16				99.47
lngdG292	G	42.57	0	23.71	0.51	9.71	0.54	18.1	5.44				100.58
lngdG293	G	41.92	0.02	22.65	0.51	9.56	0.54	19.08	5.44				99.72
lngdG294	G	42.44	0.03	22.79	0.49	9.37	0.42	19.52	4.82				99.88
lngdG295	G	42.36	0.05	24.16	0.4	7.35	0.25	20.13	4.72				99.42
lngdG296	G	42.78	0.03	23.71	0.39	8.68	0.3	18.84	5.2				99.93
lngdG297	G	39.93	0.14	22.64	0.33	18.41	0.5	11.71	5.87				99.53
lngdG298	G	39.79	0.06	22.06	0.32	19.69	0.49	10.97	5.81				99.19
lngdG299	G	40.6	0.05	22.74	0.31	16.51	0.39	12.55	5.96				99.11
lngdG300	G	40.38	0.13	22.03	0.31	15.23	0.29	15.34	5.97				99.68
lngdG301	G	40.8	0.09	22.81	0.31	18.62	0.43	11.88	5.76				100.7	22.31
lngdG302	G	40.54	0.05	22.75	0.31	16.67	0.35	12.83	5.84				99.34	20.75
lngdG303	G	40.68	0.04	22.98	0.31	16.49	0.46	12.61	5.86				99.43
lngdG304	G	40.87	0.07	22.31	0.31	16.03	0.3	14.03	5.75				99.67
lngdG305	G	40.46	0.02	24.41	0.3	16.14	0.41	13.03	5.95				100.72	23.91
lngdG306	G	40.8	0.16	21.7	0.3	17.07	0.41	13.16	5.71				99.31	20.9
lngdG307	G	41.71	0.09	22.01	0.3	14.9	0.38	14.06	6.06				99.51	20.01
lngdG308	G	41.05	0.02	21.48	0.29	17.32	0.49	12.77	5.8				99.22
lngdG309	G	40.32	0.22	21.11	0.29	16.56	0.36	14.52	5.97				99.35	20.61
lngdG310	G	40.91	0.07	21.67	0.29	15.8	0.33	15.08	5.86				100.01
lngdG311	G	40.96	0.05	22	0.29	15.79	0.35	14.06	5.93				99.43
lngdG312	G	39.71	0.09	22.61	0.29	18.13	0.4	12.54	5.75				99.52	22.11
lngdG313	G	40.27	0.12	21.75	0.29	19.37	0.55	11.66	5.87				99.88
lngdG314	G	41.36	0.15	21.49	0.29	15.24	0.35	14.22	6.01				99.11	20.99
lngdG315	G	40.96	0.25	21.84	0.28	16.91	0.41	14.2	5.99				100.84
lngdG316	G	40.16	0.18	21.75	0.28	20.16	0.65	10.16	5.81				99.15	20.95
lngdG317	G	40.78	0.04	21.82	0.28	15.63	0.37	14.34	6.04				99.3	21.32
lngdG318	G	41.28	0.06	23.36	0.28	16.08	0.37	13.07	6.07				100.57
lngdG319	G	40.57	0.2	22.3	0.28	16.41	0.32	13.45	5.96				99.49
lngdG320	G	40.98	0.05	21.36	0.27	15.13	0.38	15.08	5.82				99.07
lngdG321	G	40.44	0.03	22.84	0.27	17.44	0.43	11.89	5.82				99.16
lngdG322	G	40.25	0.05	23.04	0.27	16.42	0.4	12.78	5.81				99.02
lngdG323	G	39.76	0	22.15	0.27	19.08	0.63	10.96	6.45				99.3
lngdG324	G	41.01	0.03	23.21	0.27	17.21	0.57	11.43	5.8				99.53
lngdG325	G	39.87	0.15	22.04	0.27	18.99	0.44	11.68	5.78				99.22
lngdG326	G	41.51	0.03	23.37	0.27	16.42	0.39	12.22	6.15				100.36
lngdG327	G	40.96	0.05	23.01	0.27	15.09	0.36	13.31	5.98				99.03
lngdG328	G	41.78	0.08	23.08	0.27	14.91	0.33	13.91	5.87				100.23
lngdG329	G	41.03	0.12	23.56	0.27	16.23	0.34	13.1	6.1				100.75
lngdG330	G	40.65	0.24	22.1	0.27	15.51	0.39	14.66	5.79				99.61
lngdG331	G	41.02	0.04	23.04	0.27	16.2	0.39	13.88	5.89				100.73
lngdG332	G	40.77	0.11	23.05	0.26	14.95	0.29	14.82	5.78				100.03	22.55
lngdG333	G	40.04	0.01	22.63	0.26	19.45	0.56	10.69	5.76				99.4
lngdG334	G	41.16	0.1	21.65	0.26	16.1	0.38	13.89	5.87				99.41
lngdG335	G	41.06	0.04	21.59	0.26	16.94	0.38	13.08	5.9				99.25
lngdG336	G	40.8	0.05	21.96	0.26	16.04	0.35	14.28	5.94				99.68
lngdG337	G	40.84	0.12	22.93	0.26	15.53	0.35	13.27	5.96				99.26
lngdG338	G	40.84	0.11	22.48	0.26	15.19	0.31	14.63	5.61				99.43
lngdG339	G	40.68	0.14	22.61	0.26	15.68	0.3	14.54	5.94				100.15
lngdG340	G	40.58	0	22.1	0.26	16.44	0.36	13.31	6.3				99.35
lngdG341	G	40.91	0.11	22.42	0.26	14.91	0.35	14.56	5.75				99.27
lngdG342	G	40.82	0.09	22.26	0.26	15.36	0.31	14.99	5.9				99.99
lngdG343	G	40.58	0.08	22	0.25	18.21	0.52	12.12	5.72				99.48
lngdG344	G	41.21	0.1	21.75	0.25	15.7	0.31	14.27	5.76				99.35
lngdG345	G	40.48	0.03	22.36	0.25	17.65	0.43	12.3	5.96				99.46
lngdG346	G	40.99	0.1	22.03	0.25	16.35	0.39	14.66	5.84				100.61
lngdG347	G	41.91	0.07	22.07	0.25	15.25	0.35	14.19	5.86				99.95
lngdG348	G	39.88	0.14	22.15	0.25	18.27	0.43	12.12	5.88				99.12
lngdG349	G	40.7	0.05	22.6	0.25	16.48	0.36	13.86	5.79				100.09
lngdG350	G	40.83	0.08	22.72	0.25	15.04	0.35	14.45	5.72				99.44
lngdG351	G	39.98	0.07	21.09	0.25	18.02	0.34	13.75	5.94				99.44	20.59
lngdG352	G	40.38	0.05	21.6	0.25	14.99	0.32	15.38	6.06				99.03
lngdG353	G	40.7	0.15	22.33	0.25	17.76	0.44	12.13	5.89				99.65
lngdG354	G	40.97	0.09	23.28	0.25	15.58	0.38	13.24	6.07				99.86	22.78
lngdG355	G	41.09	0.08	20.45	0.25	15.89	0.38	16.25	5.7				100.09
lngdG356	G	40.76	0.08	21.88	0.25	16.53	0.39	13.45	6.04				99.38
lngdG357	G	40.72	0.03	22.44	0.25	14.93	0.33	14.7	5.68				99.08	20.44
lngdG358	G	40.71	0.08	21.42	0.25	15.73	0.32	14.75	6.04				99.3
lngdG359	G	40.46	0.08	23.11	0.24	16.11	0.34	13.47	5.89				99.7	22.31
lngdG360	G	40.81	0.01	22.67	0.24	17.51	0.45	11.9	5.91				99.5
lngdG361	G	41	0.03	22.59	0.24	14.8	0.37	14.21	5.88				99.12	21.79
lngdG362	G	41.8	0.05	20.43	0.24	16.23	0.35	14.78	5.8				99.68
lngdG363	G	40.08	0	22.4	0.24	19.2	0.48	11.55	6.15				100.1	20.4
lngdG364	G	41.14	0.36	23.45	0.24	15.13	0.37	14.05	5.94				100.68
lngdG365	G	40.21	0.48	22.67	0.24	17.95	0.37	12.6	5.59				100.11
lngdG366	G	41.02	0.07	21.29	0.24	18.37	0.49	12.2	5.89				99.57
lngdG367	G	40.19	0.06	22.82	0.24	19.64	0.47	11.32	5.96				100.7
lngdG368	G	40.78	0.01	22.92	0.24	15.82	0.36	13.43	6.05				99.61
lngdG369	G	39.77	0.03	22.47	0.23	19.64	0.59	11.21	5.92				99.86	20.47
lngdG370	G	39.8	0.03	22.36	0.23	19.1	0.4	11.41	5.81				99.14
lngdG371	G	40.63	0.05	23.84	0.23	18.13	0.4	11.85	5.8				100.93
lngdG372	G	40.02	0.04	21.99	0.22	18.52	0.42	13.23	5.65				100.09
lngdG373	G	41.06	0.08	24.05	0.22	14.88	0.37	14.16	5.88				100.7	23.55
lngdG374	G	41.18	0.03	23.77	0.22	14	0.4	13.53	6.07				99.2
lngdG375	G	40.85	0.05	22.76	0.21	18.88	0.52	10.5	5.76				99.53
lngdG376	G	40.49	0.04	20.7	0.21	20.82	0.6	11.47	5.7				100.03
lngdG377	G	40.56	0.03	22.47	0.2	17.3	0.36	13.41	6.03				100.36
lngdG378	G	41.06	0.03	22.99	0.2	16.38	0.37	13.77	6.16				100.96
lngdG379	G	41.06	0.2	24.52	0.19	15.5	0.32	13.21	5.79				100.79
lngdG380	G	40.55	0.19	22.98	0.18	17.74	0.37	12.37	5.97				100.35
lngdG381	G	40.41	0.19	21.87	0.18	17.17	0.34	13.55	5.97				99.68
lngdG382	G	41.16	0.03	24.57	0.18	12.98	0.26	13.96	6				99.14
lngdG383	G	40.96	0.09	21.98	0.16	16.9	0.38	13.54	5.98				99.99
lngdG384	G	40.6	0.16	22.48	0.16	15.59	0.33	14.17	5.98				99.47
lngdG385	G	40.66	0.04	21.96	0.15	17.65	0.39	13.61	5.89				100.35
lngdG386	G	41.21	0.11	22.6	0.15	15.05	0.37	13.9	6.11				99.5
lngdG387	G	41.69	0	23.43	0.3	15.49	0.47	10.24	7.78				99.4
lngdG388	G	38	0.03	21.62	0	25.3	0.54	5.84	8.32				99.65
lngdG389	G	38.3	0.04	21.73	0	25	0.51	6.08	8.38				100.04
lngdG390	G	38.95	0.03	22.99	0.01	22.57	0.6	6.03	8.78				99.96
lngdG391	G	39.02	0.03	22.09	0.01	23.52	0.51	5.9	8.39				99.47
lngdG392	G	39.24	0.33	22.36	0.02	23.15	0.52	8.93	6.2				100.75
lngdG393	G	38.53	0.62	20.78	0.02	24.23	0.64	6.37	8.03				99.22
lngdG394	G	38.8	0.75	21.39	0.02	26.71	0.41	5.96	5.21				99.25
lngdG395	G	38.93	0.03	20.64	0.02	24.11	0.56	6.89	8.39				99.57
lngdG396	G	37.91	0.05	21.27	0.02	28.42	0.51	6.02	5.46				99.66
lngdG397	G	37.89	0.06	21.3	0.02	23.26	2.17	3.82	11.69				100.21
lngdG398	G	38.12	0.05	21.28	0.04	25.87	0.54	5.88	7.56				99.34
lngdG399	G	39.72	0.17	20.88	0.04	23.39	0.55	8.73	5.93				99.41
lngdG400	G	38.35	0.05	21.2	0.04	24.61	0.43	7.09	7.68				99.45
lngdG401	G	38.05	0.02	20.87	0.04	28.55	0.52	6.24	5.15				99.44
lngdG402	G	39.95	0.2	21.11	0.04	23.48	0.65	8.06	6				99.49
lngdG403	G	38.63	0.02	20.13	0.04	25.88	0.54	6.54	7.59				99.37
lngdG404	G	39.15	0.03	22.87	0.05	20.07	2.46	3.58	11.26				99.47
lngdG405	G	38.95	0.39	21.91	0.05	23.4	0.51	8.24	6.16				99.61
lngdG406	G	38.73	0.01	20.44	0.06	23.74	0.71	6.62	9.09				99.4
lngdG407	G	38.69	0.22	22.47	0.06	23.54	0.59	7.7	6.05				99.32
lngdG408	G	38.68	0.06	22.72	0.08	29.86	1.15	4.65	2.6				99.8
lngdG409	G	39.68	0.09	20.84	0.09	28.03	0.86	6.68	2.92				99.19
lngdG410	G	38.71	0.07	22.16	0.12	27.46	0.83	7.28	3.03				99.66
lngdG411	G	41.34	0.01	23.7	0.97	11.01	0.52	17.68	5.49				100.72
lngdG412	G	42.95	0.08	22.53	1.29	7.38	0.23	20.9	5.11				100.47
lngdG413	G	41.84	0.05	23.36	1.2	7.35	0.24	21.38	5.12				100.54
lngdG414	G	42.01	0.35	20.13	5.17	6.56	0.25	18.46	7.1				100.03
lngdG415	G	41.62	0.15	21.24	2.85	9.83	0.49	19.33	5.38				100.89
lngdG416	G	42.73	0.09	23.2	1.63	7.91	0.29	20	4.86				100.71
lngdG417	G	42.32	0.02	23.34	0.43	8.42	0.28	19.9	5.27				99.98
lngdG418	G	41.69	0.69	20.05	5.43	8.24	0.32	18.95	5.6				100.97
lngdG419	G	41.82	0.2	21.35	4.1	7.55	0.33	19.9	5.29				100.54
lngdG420	G	41.25	0.66	19.77	5.34	8.06	0.33	19.17	5.58				100.16
lngdG421	G	42.36	0.03	16.75	8.81	6.98	0.31	23.84	1.28				100.36
lngdG422	G	42.46	0.07	23.96	0.83	9.47	0.33	18.67	5.08				100.87
lngdG423	G	41.68	0.13	22.65	2.8	9.62	0.41	18.36	5.34				100.99
lngdG424	G	41.77	0.01	23.99	0.71	10.47	0.51	17.92	5.31				100.69
lngdG425	G	41.84	0.01	24.23	0.84	10.73	0.52	17.38	5.38				100.93
lngdG426	G	41.22	0.01	23.79	0.89	10.49	0.5	18.39	5.54				100.83
lngdG427	G	41.51	0.01	23.86	0.98	10.65	0.47	17.64	5.41				100.53
lngdG428	G	41.28	0.03	23.33	1.12	10.39	0.55	16.95	5.58				99.23
lngdG429	G	40.85	0.26	17.49	7.55	7.89	0.3	17.74	7.07				99.15
lngdG430	G	41.7	0.02	22.53	1.06	10.59	0.52	18.04	5.47				99.93
lngdG431	G	41.41	0.03	21.96	1.12	10.47	0.48	18.24	5.73				99.44
lngdG432	G	41.69	0.02	23.69	0.92	10.43	0.5	17.14	5.38				99.77
lngdG433	G	41.58	0.02	22.65	0.83	10.31	0.49	18.1	5.49				99.47
lngdG434	G	41.16	0.03	23.6	1.14	10.24	0.48	18.05	5.51				100.21
lngdG435	G	42.01	0.02	23.58	1.14	10.53	0.49	17.7	5.44				100.91
lngdG436	G	41.51	0.01	23.27	0.77	10.23	0.5	17.67	5.31				99.27
lngdG437	G	41.08	0.03	17.29	8.55	7.3	0.36	20.92	3.73				99.26
lngdG438	G	41.21	0.02	24.8	0.77	10.09	0.53	17.88	5.37				100.67
lngdG439	G	41.34	0	24.4	0.65	10.46	0.48	17.92	5.41				100.66
lngdG440	G	41.81	0.01	24.05	0.86	10.18	0.48	17.73	5.56				100.68
lngdG441	G	41.56	0.03	24.03	1.19	10.3	0.52	17.79	5.56				100.98
lngdG442	G	41.9	0.01	23.45	0.82	10.25	0.46	18.45	5.36				100.7
lngdG443	G	41.65	0.02	23.1	0.74	9.93	0.41	17.86	5.36				99.07
lngdG444	G	41.64	0.02	24.22	0.78	9.91	0.48	17.73	5.46				100.24
lngdG445	G	41.42	0.02	23.71	0.98	9.91	0.51	16.96	5.51				99.02
lngdG446	G	41.72	0.04	23.83	0.9	9.88	0.54	16.97	6.05				99.93
lngdG447	G	41.87	0.01	23.91	0.69	9.77	0.48	18.57	5.37				100.67
lngdG448	G	41.89	0.36	20.78	4.72	5.91	0.28	18.23	7.01				99.18
lngdG449	G	41.99	0.03	23.82	0.92	9.58	0.49	17.17	5.39				99.39
lngdG450	G	41.17	0.02	23.81	0.94	9.55	0.45	17.65	5.43				99.02
lngdG451	G	42.19	0.06	23.65	1.77	7.98	0.42	18.43	4.86				99.36
lngdG452	G	42.23	0.36	20.36	4.6	6.37	0.29	19.12	6.86				100.19
lngdG453	G	41.62	0.12	21.95	2.86	8.65	0.45	17.97	5.43				99.05
lngdG454	G	42.51	0.04	18.98	7.72	6.23	0.33	22.35	1.24				99.4
lngdG455	G	42.13	0.03	18.36	7.88	6.14	0.31	23.12	1.24				99.21
lngdG456	G	41.68	0.02	23.78	0.89	9.59	0.5	18.59	5.34				100.39
lngdG457	G	41.9	0.03	23.48	1.04	9.77	0.48	17.15	5.46				99.31
lngdG458	G	41.37	1.34	18.82	5.41	7.82	0.32	18.23	5.7				99.01
lngdG459	G	41.72	0.04	18.97	7.63	6.1	0.31	23.09	1.27				99.13
lngdG460	G	41.09	0.01	23.72	0.93	9.55	0.5	18.08	5.33				99.21
lngdG461	G	42.13	0.83	17.31	4.83	8.86	0.31	20.36	6.04				100.67
lngdG462	G	42.28	0.03	17.37	7.13	7.27	0.33	24.43	1.28				100.12
lngdG463	G	41.85	0.64	18.57	4.42	7.78	0.3	21.16	5.68				100.4
lngdG464	G	42.87	0.35	18.84	4.09	6.66	0.31	20.76	6.72				100.6
lngdG465	G	41.78	0.19	19.33	3.25	7.65	0.34	21.71	5.46				99.71
lngdG466	G	42.53	0.04	17.55	7.05	6.95	0.31	24.71	1.29				100.43
lngdG467	G	42.21	0.02	21	0.78	10.73	0.44	19.92	5.42				100.52
lngdG468	G	41.86	0.1	21.24	2.52	9.82	0.38	19.26	5.61				100.79
lngdG469	G	42.07	0.01	21.38	0.58	10.75	0.45	20.12	5.34				100.7
lngdG470	G	41.53	0.02	22.71	0.85	10.77	0.44	18.67	5.47				100.46
lngdG471	G	41.88	0.01	21.64	0.83	11.05	0.41	19.36	5.54				100.72
lngdG472	G	41.85	0.02	22.47	0.87	10.51	0.45	19.2	5.53				100.9
lngdG473	G	42.65	0.01	20.69	0.73	10.92	0.38	20.2	5.37				100.95
lngdG474	G	41.91	0.09	22.07	1.22	9.87	0.34	19.73	5.08				100.31
lngdG475	G	41.23	0.05	19.72	3.68	8.5	0.42	19.02	6.71				99.33
lngdG476	G	41.82	0.24	18.95	5.1	6.86	0.26	20.32	6.37				99.92
lngdG477	G	41.83	0.27	18.31	4.89	6.59	0.28	20.69	6.46				99.32
lngdG478	G	42.03	0.34	19.25	4.04	6.83	0.25	20.19	6.73				99.66
lngdG479	G	42.48	0.67	16.81	4.16	7.94	0.27	22.18	5.52				100.03
lngdG480	G	41.85	0.67	18.96	4.29	8.17	0.25	20.54	5.48				100.21
lngdG481	G	42.2	0.03	17.42	6.98	6.93	0.29	25.01	1.3				100.16
lngdG482	G	41.87	0.65	18.71	4.3	8.11	0.32	20.44	5.45				99.85
lngdG483	G	42.63	0.35	18.87	4.04	6.86	0.23	20.92	6.66				100.56
lngdG484	G	41.67	0.68	19.02	3.94	8.12	0.24	21.57	5.48				100.72
SILenG10	G	41.22	0.03	22.34	0.97	10.54	0.46	18.69	5.46	0	0		99.71

## Sheet: LenIlm
		Table 1-4. Microprobe analyses of ilmenites from Leningrad pipe (wt.%)
		SiO2	TiO2	Al2O3	Cr2O3	FeO	MnO	MgO					Total
lnIdI001	I		49.91	0.52	0.94	42.04	0.41	6.31					100.13
lnIdI002	I		50.84	0.61	0.06	41.05	0.54	6.27					99.37
lnIdI003	I		51.16	0.5	1.23	39.24	0.28	7.48					99.89
lnIdI004	I		48.47	0.52	1.16	43.19	0.28	5.77					99.39
lnIdI005	I		50.08	0.54	0.64	40.82	0.37	6.92					99.37
lnIdI006	I		49.19	0.57	0	48.39	1.22	0.34					99.71
lnIdI007	I		49.97	0.47	0.02	42.49	0.48	5.88					99.31
lnIdI008	I		49.12	0.6	0.57	42.2	0.35	6.43					99.27
lnIdI009	I		51.16	0.57	0.05	41.51	0.5	5.71					99.5
lnIdI010	I		50.82	0.58	0.08	41.09	0.51	5.92					99
lnIdI011	I		51.74	0.53	0.33	34.68	0.27	11.73					99.28
lnIdI012	I		50.75	0.51	0.24	41.48	0.56	5.79					99.33
lnIdI013	I		48.8	0.48	0.02	43.11	0.52	6.34					99.27
lnIdI014	I		52.29	0.59	0.29	33.79	0.21	12.01					99.18
lnIdI015	I		50.68	0.57	0.25	40.03	0.47	7.21					99.21
lnIdI016	I		49.49	0.56	0.04	42.77	0.39	6					99.25
lnIdI017	I		50.28	0.56	0.03	42.19	0.51	5.55					99.12
lnIdI018	I		48.63	0.52	0.02	44.1	0.41	5.58					99.26
lnIdI019	I		50.23	0.56	0.04	41.83	0.46	6.03					99.15
lnIdI020	I		50.22	0.51	1.23	39.92	0.22	6.99					99.09
lnIdI021	I		50.88	0.52	0.08	41.64	0.35	5.58					99.05
lnIdI022	I		50.52	0.51	0.22	41.83	0.55	5.69					99.32
lnIdI023	I		48.47	0.55	0.64	44.03	0.23	5.31					99.23
lnIdI024	I		52.09	0.5	1.3	36.18	0.23	9.07					99.37
lnIdI025	I		47.78	0.45	0.82	45.06	0.55	4.62					99.28
lnIdI026	I		48.52	0.51	0.02	47.89	1.94	0.29					99.17
lnIdI027	I		48.77	0.46	0.64	42.37	0.62	6.26					99.12
lnIdI028	I		51.22	0.54	0.53	38.67	0.78	7.54					99.28
lnIdI029	I		52.39	0.44	0.66	36.17	0.69	8.89					99.24
lnIdI030	I		50.6	0.42	0.02	42.18	0.78	5.12					99.12
lnIdI031	I		50.54	0.4	0	41.52	0.96	5.81					99.23
lnIdI032	I		50.17	0.54	1.08	42.56	1.95	2.73					99.03
lnIdI033	I		51.94	0.44	0.11	40.46	0.73	6.16					99.84
lnIdI034	I		46.64	0.37	0.01	45.81	0.71	5.91					99.45
lnIdI035	I		50.84	0.36	0.17	41.15	0.86	6.16					99.54
lnIdI036	I		50.69	0.44	0.3	39.8	0.59	7.44					99.26
lnIdI037	I		49.12	0.42	0.18	43.37	0.64	5.71					99.44
lnIdI038	I		49.52	0.42	0	43.21	0.78	5.56					99.49
lnIdI039	I		50.79	0.32	0.14	41.69	0.64	5.7					99.28
lnIdI040	I		53.04	0.57	0.46	37.26	0.44	8.52					100.29
lnIdI041	I		51.56	0.58	0.16	41.38	0.63	5.79					100.1
lnIdI042	I		51.6	0.6	0.7	39.58	0.53	6.79					99.8
lnIdI043	I		52.02	0.52	0.38	38.53	0.71	7.16					99.32
lnIdI044	I		51.27	0.4	0.43	39.51	0.73	7.09					99.43
lnIdI045	I		52.74	0.43	0.39	36.28	0.75	8.7					99.29
lnIdI046	I		52.4	0.46	0.42	34.68	2.1	9.5					99.56
lnIdI047	I		48.38	0.48	0.14	45.05	0.49	4.63					99.17
lnIdI048	I		47.83	0.48	0.14	45.77	0.49	4.47					99.18
lnIdI049	I		51.57	0.51	0.27	39.39	0.67	6.93					99.34
lnIdI050	I		49.29	0.53	0.25	43.12	0.58	5.35					99.12
lnIdI051	I		50.36	0.38	0.33	38.92	0.79	8.83					99.61
lnIdI052	I		50.98	0.57	0.02	41.27	0.79	5.49					99.12
lnIdI053	I		51.35	0.36	0.97	39.33	0.51	6.81					99.33
lnIdI054	I		51.66	0.47	0.48	38.87	3.68	3.94					99.1
lnIdI055	I		52.1	0.45	0.94	37.88	0.54	7.93					99.84
lnIdI056	I		52.49	0.52	0.45	34.84	0.36	10.48					99.14
lnIdI057	I		50.9	0.48	0.93	36.53	4	6.41					99.25
lnIdI058	I		49.88	0.51	0.25	41.73	0.5	6.5					99.37
lnIdI059	I		48.38	0.46	0.51	44.21	0.57	5.31					99.44
lnIdI060	I		49.84	0.57	0.48	42.37	0.47	5.66					99.39
lnIdI061	I		50.99	0.48	0.06	41.65	0.62	5.45					99.25
lnIdI062	I		52.6	0.59	0.6	36.59	0.36	8.74					99.48
lnIdI063	I		49.76	0.51	0.1	41.35	0.73	6.67					99.12
lnIdI064	I		50.53	0.52	0.25	41.03	0.72	6.1					99.15
lnIdI065	I		48.28	0.55	0.77	43.12	0.53	6.31					99.56
lnIdI066	I		48.55	0.5	0.75	42.66	0.5	6.21					99.17
lnIdI067	I		49.49	0.58	0.01	42.27	0.69	6.21					99.25
lnIdI068	I		50.81	0.53	0.94	38.3	0.47	8.26					99.31
lnIdI069	I		46.49	0.51	0.07	46.14	0.54	5.3					99.05
lnIdI070	I		52.41	0.52	0.67	37.21	0.5	7.99					99.3
lnIdI071	I		51.34	0.55	0.29	39.53	0.84	6.56					99.11
lnIdI072	I		50.66	0.53	0.03	41.89	0.74	5.54					99.39
lnIdI073	I		49.71	0.56	0.05	42.18	0.77	6.09					99.36
lnIdI074	I		50.09	0.51	0.06	42.82	0.65	5.41					99.54
lnIdI075	I		54.71	0.7	0.3	31.1	3.68	8.88					99.37
lnIdI076	I		51.79	0.57	0.41	37.04	0.52	8.79					99.12
lnIdI077	I		51.02	0.55	0.45	39.22	0.55	7.3					99.09
lnIdI078	I		51.95	0.6	0.37	36.72	0.29	9.36					99.29
lnIdI079	I		50.77	0.56	0.15	40.5	0.57	6.79					99.34
lnIdI080	I		49.92	0.51	0.12	42.45	0.59	5.57					99.16
lnIdI081	I		49.32	0.53	0.02	43.37	0.57	5.5					99.31
lnIdI082	I		49.53	0.56	0.37	41.66	0.57	6.7					99.39
lnIdI083	I		49.93	0.72	0	42.41	0.66	5.44					99.16
lnIdI084	I		50.11	0.54	0.08	41.49	0.58	6.21					99.01
lnIdI085	I		53.38	0.66	0.96	31.57	0.51	12.33					99.41
lnIdI086	I		52.5	0.79	0.9	34.13	0.7	10.7					99.72
lnIdI087	I		49.1	0.55	0	43.03	0.57	5.92					99.17
lnIdI088	I		51.3	0.5	0.38	38.04	0.34	8.79					99.35
lnIdI089	I		50.93	0.56	0.19	41.3	0.49	5.75					99.22
lnIdI090	I		49.9	0.47	0.12	41.9	0.5	6.33					99.22
lnIdI091	I		49.88	0.54	0.01	42.46	0.57	5.87					99.33
lnIdI092	I		49.31	0.49	0.37	42.6	0.44	5.86					99.07
lnIdI093	I		53.31	0.83	0.99	29.06	1.8	13.29					99.28
lnIdI094	I		50.21	0.51	0.62	39.75	0.44	7.62					99.15
lnIdI095	I		49.59	0.53	0.08	42.73	0.54	5.95					99.42
lnIdI096	I		49.92	0.48	0.02	42.27	0.57	6.08					99.34
lnIdI097	I		50.04	0.55	0.36	39.66	0.35	8.36					99.32
lnIdI098	I		49.25	0.55	0.32	43.3	0.4	5.5					99.32
lnIdI099	I		53.93	0.55	0.71	33.14	0.39	10.83					99.55
lnIdI101	I		50.48	0.51	0.3	41.74	0.52	5.96					99.51
lnIdI102	I		54.32	0.58	0.5	29.05	0.31	14.54					99.3
lnIdI103	I		49.54	0.46	0.32	41.39	0.49	7.33					99.53
lnIdI104	I		50.35	0.52	0.08	42	0.49	5.79					99.23
lnIdI105	I		48.61	0.52	0.06	43.47	0.5	5.96					99.12
lnIdI106	I		51.87	0.63	1.03	31.65	0.42	13.54					99.14
lnIdI107	I		48.5	0.51	0.18	43.9	0.39	5.66					99.14
lnIdI108	I		51.58	0.46	0.22	40.21	0.77	6.12					99.36
lnIdI109	I		51.97	0.51	0.29	39.5	0.86	6.38					99.51
lnIdI110	I		53.38	0.56	1.29	29.13	1.83	12.93					99.12
lnIdI111	I		53.03	0.54	1.73	31.72	0.67	11.54					99.23
lnIdI112	I		53.01	0.56	1.81	31.49	0.66	11.78					99.31
lnIdI113	I		52.39	0.49	1.28	32.48	0.69	11.9					99.23
lnIdI114	I		51.22	0.5	0.26	38.25	2.86	6.33					99.42
lnIdI115	I		49.04	0.57	0.28	43.17	0.77	5.35					99.18
lnIdI116	I		51.11	0.56	0.14	40.67	0.83	6.15					99.46
lnIdI117	I		47.67	0.47	0	48.88	1.76	0.26					99.04
lnIdI118	I		51.13	0.56	0.29	41.48	0.82	5.46					99.74
lnIdI119	I		49.97	0.54	0	42.25	0.76	5.51					99.03
lnIdI120	I		51.03	0.53	0.15	40.84	0.96	5.9					99.41
lnIdI121	I		48.08	0.54	1.08	43.76	0.48	5.43					99.37
lnIdI122	I		51.19	0.56	0.3	36.08	0.38	10.61					99.12
lnIdI123	I		51.93	0.55	0.22	39.68	0.8	6.2					99.38
lnIdI124	I		51.24	0.56	0.04	41.39	0.76	5.29					99.28
lnIdI125	I		51.89	0.47	0.29	39.5	0.87	6.42					99.44
lnIdI126	I		51.84	0.52	0.17	39.74	0.76	6.42					99.45
lnIdI127	I		54.79	0.55	0.4	29.45	0.75	13.07					99.01
lnIdI128	I		53.93	0.6	1.24	31.18	0.65	11.74					99.34
lnIdI129	I		53.62	0.56	0.55	33.19	1.51	9.82					99.25
lnIdI130	I		53.46	0.71	1.43	31.33	0.58	11.94					99.45
lnIdI131	I		52.22	0.61	0.85	34.92	1.82	8.73					99.15
lnIdI132	I		51.96	0.5	0.29	37.77	0.76	8.02					99.3
lnIdI133	I		51.54	0.5	0.29	40.26	0.7	5.9					99.19
lnIdI134	I		51.34	0.44	0.3	39.87	0.72	6.76					99.43
lnIdI135	I		50.25	0.61	0.62	42.52	3.05	2					99.05
lnIdI136	I		52.54	0.49	0.52	37.11	0.73	7.77					99.16
lnIdI137	I		50.56	0.5	0.05	42.12	0.85	5.38					99.46
lnIdI138	I		51.87	0.57	0.27	39.21	0.89	6.57					99.38
lnIdI139	I		51.54	0.49	0.57	38.62	0.63	7.56					99.41
lnIdI140	I		50.93	0.51	0.5	39.99	0.6	6.81					99.34
lnIdI141	I		54.98	0.58	0.75	32.53	0.41	11.14					100.39
lnIdI142	I		48.23	0.5	1.11	42.79	0.44	5.95					99.02
lnIdI143	I		50.76	0.53	0.26	35.29	0.33	11.99					99.16
lnIdI144	I		53.05	0.55	1.26	34.02	0.4	9.89					99.17
lnIdI145	I		49.92	0.49	0.02	41.9	3.04	4.03					99.4
lnIdI146	I		44.96	0.43	0.26	48.22	0.51	4.68					99.06
lnIdI147	I		50	0.48	0.02	42.24	0.81	5.69					99.24
lnIdI148	I		50	0.58	1.24	40.71	0.46	6.57					99.56
lnIdI149	I		52.07	0.47	0.11	39.82	0.74	6.38					99.59
lnIdI150	I		51.36	0.51	0.12	40.48	0.75	5.94					99.16
lnIdI151	I		56.08	0.77	0.53	30.57	0.37	12					100.32
lnIdI152	I		50.96	0.49	0.14	41.3	0.65	5.78					99.32
lnIdI153	I		50.49	0.44	0.17	40.73	0.91	6.31					99.05
lnIdI154	I		50.51	0.51	0.32	40.95	0.76	6.5					99.55
lnIdI155	I		50.34	0.54	0.18	41.42	0.81	6					99.29
lnIdI156	I		51.82	0.55	0.15	39.18	0.66	6.64					99
lnIdI157	I		51	0.56	0.06	40.87	0.67	5.92					99.08
lnIdI158	I		51.46	0.48	0.26	39.54	0.76	6.59					99.09
lnIdI159	I		49.18	0.5	0.02	43.03	0.63	5.86					99.22
lnIdI160	I		50.62	0.43	0.02	42.09	0.64	5.52					99.32
lnIdI161	I		50.48	0.49	0.63	42.07	0.43	5.5					99.6
lnIdI162	I		51.73	0.43	0.25	39.96	0.7	6.14					99.21
lnIdI163	I		51.77	0.53	0.37	36.68	0.37	9.48					99.2
lnIdI164	I		50.59	0.49	0	42.08	0.71	5.6					99.47
lnIdI165	I		50.53	0.47	0.07	38.66	0.88	8.76					99.37
lnIdI166	I		50.52	0.46	0.1	41.89	0.61	5.92					99.5
lnIdI167	I		52.53	0.47	0.28	35.08	5.29	6.24					99.89
lnIdI168	I		52.99	0.55	1.06	35.11	0.37	9.06					99.14
lnIdI169	I		50.48	0.49	0.12	41.44	0.59	6.07					99.19
lnIdI170	I		48.84	0.44	0.49	43.05	0.5	6.07					99.39
lnIdI171	I		50.21	0.43	0.04	42.45	0.72	5.51					99.36
lnIdI172	I		49.92	0.38	0.07	42.68	0.52	5.98					99.55
lnIdI173	I		50.69	0.53	0.05	41.91	0.64	5.49					99.31
lnIdI174	I		51.29	0.5	0.23	35.1	0.3	11.8					99.22
lnIdI175	I		50.59	0.56	0.28	42.21	0.46	5.15					99.25
lnIdI176	I		52.34	0.52	0.27	32.61	1.86	11.55					99.15
lnIdI177	I		50.14	0.55	0.21	41.89	0.6	5.73					99.12
lnIdI178	I		50.08	0.42	0.21	42.33	0.55	5.57					99.16
lnIdI179	I		53.16	0.49	1.3	33.86	0.47	9.85					99.13
lnIdI180	I		48.31	0.45	1.09	42.95	0.43	5.97					99.2
lnIdI181	I		53.33	0.56	0.71	35.83	0.42	8.69					99.54
lnIdI182	I		49.25	0.42	0.27	40.24	0.83	8.3					99.31
lnIdI183	I		50.36	0.45	0	42.63	0.72	5.17					99.33
lnIdI184	I		51.16	0.5	0.24	40.37	0.85	6.43					99.55
lnIdI185	I		50.81	0.39	0.15	42.43	0.68	4.84					99.3
lnIdI186	I		50.18	0.52	0.17	42.79	0.97	5.5					100.13
lnIdI187	I		50.05	0.53	0	45.68	3.05	0.23					99.54
lnIdI188	I		48.71	0.48	0	43.67	0.77	5.88					99.51
lnIdI189	I		50.18	0.5	0.05	47.82	1.81	0.32					100.68
lnIdI190	I		51.03	0.46	0.16	42.2	0.58	5.63					100.06
lnIdI191	I		47.61	0.48	1.02	44.78	0.43	5.39					99.71
lnIdI192	I		50.74	0.56	1.49	32.59	3.27	10.86					99.51
lnIdI193	I		51.03	0.45	0.16	44.85	2.74	0.22					99.45
lnIdI194	I		49.98	0.46	0.04	42.65	0.63	5.88					99.64
lnIdI195	I		51.14	0.52	0.62	39.25	0.55	7.25					99.33
lnIdI196	I		50.81	0.46	0.17	41.75	0.73	5.93					99.85
lnIdI197	I		51.03	0.54	0.36	42.54	2.88	2.12					99.47
lnIdI198	I		47.66	0.44	0.31	44.87	0.49	5.47					99.24
lnIdI199	I		50.35	0.43	0.16	41.49	0.71	5.9					99.04
lnIdI200	I		50.67	0.44	0.01	42.37	0.61	5.63					99.73
lnIdI201	I		48.03	0.46	0.34	45.45	0.48	4.83					99.59
lnIdI202	I		47.76	0.47	0.9	44.99	0.38	5.43					99.93
lnIdI203	I		51.47	0.44	1.1	38.39	0.39	8.14					99.93
lnIdI204	I		50.41	0.47	0.31	41.62	0.41	6.8					100.02
lnIdI205	I		51.09	0.45	0.26	40.53	0.7	6.69					99.72
lnIdI206	I		48.78	0.5	0	42.62	0.65	6.75					99.3
lnIdI207	I		51.23	0.47	0.24	40.52	0.63	6.74					99.83
lnIdI208	I		50.32	0.45	0.09	41.96	0.56	5.86					99.24
lnIdI209	I		50.43	0.52	0.05	42.21	0.71	5.28					99.2
lnIdI210	I		50.97	0.48	0.37	39.94	0.5	6.84					99.1
lnIdI211	I		53.04	0.54	1.33	34.04	0.44	9.95					99.34
lnIdI212	I		56.06	0.52	0.14	22.64	5.41	14.69					99.46
lnIdI213	I		51.45	0.54	0.26	33.17	1.52	12.53					99.47
lnIdI214	I		51.41	0.43	0.2	33.94	1.34	11.72					99.04
lnIdI215	I		51.34	0.52	0.23	34.66	0.89	11.52					99.16
lnIdI216	I		51.22	0.58	0.19	35.56	2	9.7					99.25
lnIdI217	I		49.37	0.47	0.19	41.87	0.76	6.48					99.14
lnIdI218	I		50.31	0.46	0.06	41.3	0.77	6.45					99.35
lnIdI219	I		51.05	0.48	0.25	40.97	0.84	5.52					99.11
lnIdI220	I		49.53	0.56	0.14	43.45	0.58	4.82					99.08
lnIdI221	I		49.77	0.55	0.11	42.65	0.58	5.64					99.3
lnIdI222	I		53.79	0.56	1.43	31.82	0.43	11.53					99.56
lnIdI223	I		53.37	0.48	1.92	31.49	0.45	11.66					99.37
lnIdI224	I		53.23	0.49	2.02	30.93	0.46	12.28					99.41
lnIdI225	I		51.68	0.46	0.33	39.32	0.64	6.86					99.29
lnIdI226	I		57.19	0.55	0.09	27.62	0.35	13.83					99.63
lnIdI227	I		47.76	0.55	0.17	44.79	0.49	5.68					99.44
lnIdI228	I		50.42	0.54	0.15	41.19	0.6	6.1					99
lnIdI229	I		51.26	0.58	0.4	40.67	3.22	3.16					99.29
lnIdI230	I		54.41	0.53	0.54	29.53	0.64	13.55					99.2
lnIdI231	I		53.81	0.53	0.52	31.16	0.58	12.77					99.37
lnIdI232	I		53.63	0.56	0.54	32.21	0.68	11.38					99
lnIdI233	I		53.01	0.53	0.54	34.34	0.61	10.04					99.07
lnIdI234	I		52.92	0.59	0.52	33.77	0.52	10.92					99.24
lnIdI235	I		52.84	0.57	0.51	36.25	0.54	8.48					99.19
lnIdI236	I		52.74	0.46	0.5	35.35	0.52	9.6					99.17
lnIdI237	I		52.34	0.49	0.47	36.62	0.53	8.63					99.08
lnIdI238	I		52.18	0.53	0.46	36.27	0.5	9.56					99.5
lnIdI239	I		51.98	0.48	0.49	38.17	0.5	7.51					99.13
lnIdI240	I		51.69	0.43	0.54	38.99	0.5	7.11					99.26
lnIdI241	I		51.72	0.47	0.59	38.7	0.5	7.3					99.28
lnIdI242	I		50.42	0.58	0.06	41.88	0.63	5.8					99.37
lnIdI243	I		50.11	0.49	0.07	41.69	0.58	6.45					99.39
lnIdI244	I		50.39	0.54	0.05	42.05	0.64	5.81					99.48
lnIdI245	I		50.02	0.55	0.31	41.35	0.45	6.38					99.06
lnIdI246	I		49.82	0.44	0.32	41.87	0.37	6.32					99.14
lnIdI247	I		49.5	0.55	0	42.94	0.58	5.5					99.07
lnIdI248	I		49.62	0.44	0.01	43.08	0.55	5.58					99.28
lnIdI249	I		52.35	0.53	1.31	36.28	0.35	8.44					99.26
lnIdI250	I		50.71	0.45	0.21	41.34	0.55	6.03					99.29
lnIdI251	I		50.67	0.43	0.24	41.12	0.57	6.14					99.17
lnIdI252	I		52.37	0.48	0.2	36.14	0.44	9.45					99.08
lnIdI253	I		52.04	0.53	0.19	37.76	0.46	8.09					99.07
lnIdI254	I		51.89	0.5	0.21	37.95	0.5	8.21					99.26
lnIdI255	I		51.84	0.47	0.19	38.2	0.46	8.24					99.4
lnIdI256	I		51.82	0.52	0.21	38.16	0.48	7.81					99
lnIdI258	I		51.16	0.49	0.04	41.7	0.47	5.43					99.29
lnIdI259	I		50.36	0.48	0.49	40.11	0.34	8.11					99.89
lnIdI260	I		50.53	0.45	0.13	41.3	0.52	6.21					99.14
lnIdI261	I		52.2	0.56	0.32	39.15	0.42	6.58					99.23
lnIdI262	I		54.43	0.57	1.37	31.34	0.38	11.4					99.49
lnIdI263	I		49.3	0.44	0.03	42.93	0.47	6.13					99.3
lnIdI264	I		50.97	0.48	0.27	41.79	0.58	5.61					99.7
lnIdI265	I		50.97	0.55	0.09	41.67	0.47	5.88					99.63
lnIdI266	I		53.63	0.61	1.31	30.69	0.42	12.62					99.28
lnIdI267	I		52.97	0.62	1.24	31.01	0.64	13.06					99.54
lnIdI268	I		50.68	0.51	0.07	41.96	0.48	5.52					99.22
lnIdI269	I		49.38	0.48	0.51	46.01	1.52	1.33					99.23
lnIdI270	I		52.59	0.52	1.26	35.62	0.36	9.1					99.45
lnIdI271	I		53.27	0.52	0.27	37.19	2.5	5.54					99.29
lnIdI272	I		52.69	0.57	0.69	38.21	2.39	4.65					99.2
lnIdI273	I		49.94	0.45	0.11	42.47	0.51	5.85					99.33
lnIdI274	I		52.28	0.5	0.22	36.39	1.14	8.59					99.12
lnIdI275	I		50.98	0.53	0.18	41.22	0.49	6.13					99.53
lnIdI276	I		50.66	0.44	0.23	41.59	0.5	5.91					99.33
lnIdI277	I		49.2	0.54	0.89	41.07	6.11	1.25					99.06
lnIdI278	I		47.99	0.47	0.59	44.39	0.37	5.24					99.05
lnIdI279	I		47.97	0.54	0.56	44.75	0.35	5.32					99.49
lnIdI280	I		47.88	0.47	0.55	44.6	0.36	5.43					99.29
lnIdI281	I		47.82	0.48	0.53	44.7	0.32	5.38					99.23
lnIdI282	I		47.8	0.49	0.56	44.29	0.38	5.72					99.24
lnIdI283	I		48.74	0.46	0.28	44.13	0.43	5.27					99.31
lnIdI284	I		49.24	0.47	0.15	43.72	0.29	5.55					99.42
lnIdI285	I		51.12	0.5	0.88	39.57	0.56	6.76					99.39
lnIdI286	I		50.12	0.47	0.06	41.88	0.89	6					99.42
lnIdI287	I		50.32	0.52	0.21	41.09	1.01	6.06					99.21
lnIdI288	I		50.44	0.48	0.03	41.52	0.95	6.06					99.48
lnIdI289	I		51.39	0.43	0.22	33.74	0.97	12.42					99.17
lnIdI290	I		51.22	0.56	0.18	34.04	2.79	10.75					99.54
lnIdI291	I		50.19	0.55	0.18	39.61	0.97	8.24					99.74
lnIdI292	I		49.02	0.46	0.24	42.43	0.71	6.42					99.28
lnIdI293	I		52.35	0.51	0.28	39.76	0.72	6.76					100.38
lnIdI294	I		52.29	0.55	0.25	39.75	0.74	6.64					100.22
lnIdI295	I		49.06	0.48	0.11	42.93	0.51	6.04					99.13
lnIdI296	I		48.73	0.49	0.09	43.71	0.48	5.95					99.45
lnIdI297	I		54.33	0.65	0.65	29.31	0.66	13.83					99.43
lnIdI298	I		52.79	0.65	0.77	33.84	1.21	10.08					99.34
lnIdI299	I		52.47	0.51	0.07	33.81	0.7	11.55					99.11
lnIdI300	I		51.29	0.54	0.04	40.01	0.7	6.9					99.48
lnIdI301	I		50.8	0.47	0.11	41.01	0.84	6.22					99.45
lnIdI302	I		50.28	0.51	0.02	42.13	0.77	5.36					99.07
lnIdI303	I		52.7	0.55	0.5	36.79	0.65	7.91					99.1
lnIdI304	I		48.56	0.48	0.36	43.92	0.53	5.57					99.42
lnIdI305	I		49.46	0.52	0	42.32	0.86	6.05					99.21
lnIdI306	I		50.91	0.47	0.17	41.36	0.85	5.55					99.31
lnIdI307	I		49.93	0.51	0.01	42.31	0.96	5.57					99.29
lnIdI308	I		49.42	0.49	0.23	42.78	0.69	5.43					99.04
lnIdI309	I		49.09	0.47	0	45.56	3.56	0.37					99.05
lnIdI310	I		53.47	0.56	1.15	29.56	1.15	13.21					99.1
lnIdI311	I		53.4	0.5	0.19	33.95	3.4	7.98					99.42
lnIdI312	I		52.99	0.61	1.43	32.01	0.66	11.62					99.32
lnIdI313	I		52.13	0.51	0.38	32.67	0.79	12.97					99.45
lnIdI314	I		51.34	0.55	0.39	36.33	0.74	9.95					99.3
lnIdI315	I		51.97	0.48	0.05	39.33	0.8	6.8					99.43
lnIdI316	I		51.76	0.57	0.05	41.34	0.46	5.28					99.46
lnIdI317	I		51.29	0.53	0.05	41.81	0.5	5.37					99.55
lnIdI318	I		51.08	0.47	0.44	39.58	0.53	6.96					99.06
lnIdI319	I		42.45	0.57	0.1	55.01	1.22	0.67					100.02
lnIdI320	I		49.98	0.85	0.04	47.84	1.45	0.81					100.97
lnIdI321	I		48.61	0.88	0.03	48.79	1.35	1.11					100.77
lnIdI322	I		50.49	0.72	0	44.65	4.75	0.34					100.95
lnIdI323	I		51.34	0.76	0	43.93	3.57	0.58					100.18
lnIdI324	I		51.32	0.79	0	44.08	3.68	0.43					100.3
lnIdI325	I		51.18	0.7	0	43.44	3.6	0.53					99.45
lnIdI326	I		50.29	0.99	0.47	40.05	0.43	6.37					98.6
lnIdI328	I		50.95	0.51	0	41.95	0.86	5.01					99.28
lnIdI329	I		50.71	0.43	0.22	39.39	0.46	7.94					99.15
lnIdI330	I		51.2	0.43	0.04	40.1	1.21	5.9					98.88
lnIdI331	I		49.24	0.17	0.08	45.03	0.55	4.33					99.4
lnIdI332	I		52.2	0.13	0.18	40.98	0.73	5.61					99.83
lnIdI333	I		50.68	0.14	0	43.42	0.63	4.81					99.68
lnIdI334	I		50.62	0.13	0.06	42.05	0.7	5.69					99.25
lnIdI335	I		50.78	0.15	0.07	41.24	0.5	7.11					99.85
lnIdI336	I		49.67	0.18	0.36	44.17	0.51	4.77					99.66
lnIdI337	I		45.17	0.11	0.01	49.65	0.44	3.77					99.15
lnIdI338	I		50.52	0.15	0.17	43.53	0.5	4.39					99.26
lnIdI339	I		49.8	0.14	0.29	43.58	0.52	4.83					99.16
lnIdI340	I		51.6	0.14	0.11	41.16	0.7	5.72					99.43
lnIdI341	I		49.71	0.14	0.42	43.45	0.48	5.22					99.42
lnIdI342	I		52.67	0.15	0.75	38.54	0.38	6.78					99.27
lnIdI343	I		46.31	0.15	0.87	48.17	0.35	3.63					99.48
lnIdI344	I		48.8	0.15	0.62	44.85	0.47	4.27					99.16
lnIdI345	I		51.19	0.16	0.05	40.09	0.35	7.53					99.37
lnIdI346	I		50.38	0.13	0.02	43.46	0.73	5.06					99.78
lnIdI347	I		55.08	0.15	1.21	33.84	0.31	9.02					99.61
lnIdI348	I		55.36	0.16	1.21	33.08	0.32	9.01					99.14
lnIdI349	I		50.9	0.12	0.01	42.73	0.66	5.04					99.46
lnIdI350	I		51.57	0.18	0.13	42.24	0.64	5.03					99.79
lnIdI351	I		53.67	0.12	0.6	37	0.49	7.46					99.34
lnIdI352	I		51.4	0.13	0.33	42.41	0.45	5.24					99.96
lnIdI353	I		50.52	0.14	0.25	43.34	0.49	4.73					99.47
lnIdI354	I		51.26	0.16	0.16	42.3	0.66	4.84					99.38
lnIdI355	I		51.2	0.15	0.06	42.62	0.66	5.07					99.76
lnIdI356	I		49.27	0.15	0.53	44.76	0.47	4.1					99.28
lnIdI357	I		53.31	0.14	0.64	37.02	0.57	7.6					99.28
lnIdI358	I		50.52	0.14	0.69	41.37	0.42	6.53					99.67
lnIdI359	I		48.48	0.17	0.23	45.34	0.58	4.36					99.16
lnIdI360	I		52.07	0.15	1.31	37.31	0.47	8.19					99.5
lnIdI361	I		56.84	0.17	0.55	32.13	0.28	10.49					100.46
lnIdI362	I		51.22	0.16	0	42.09	0.72	5.34					99.53
lnIdI363	I		51.22	0.14	0.06	42.03	0.72	5					99.17
lnIdI364	I		50.08	0.16	0.44	43.63	0.4	4.76					99.47
lnIdI365	I		50.68	0.15	0.04	42.51	0.64	5.12					99.14
lnIdI366	I		55.31	0.44	7.43	21.36	0.18	14.32					99.04
lnIdI367	I		48.55	0.15	0.79	45.72	0.45	3.86					99.52
lnIdI368	I		48.92	0.15	0.56	44.83	0.44	4.6					99.5
lnIdI369	I		52.03	0.14	0.71	39.28	0.51	6.58					99.25
lnIdI370	I		50.72	0.13	0.79	41.32	0.48	6.79					100.23
lnIdI371	I		53.44	0.15	1.22	35.45	0.31	8.71					99.28
lnIdI372	I		50.46	0.14	0	42.33	0.67	5.54					99.14
lnIdI373	I		58.75	0.19	0.05	27.06	0.32	13.41					99.78
lnIdI374	I		51.93	0.14	1.45	39.39	0.37	6.53					99.81
lnIdI375	I		48.1	0.14	0.18	47.91	0.33	4.08					100.74
lnIdI376	I		52.74	0.14	0.27	39.33	0.72	6.1					99.3
lnIdI377	I		50.99	0.14	0.39	41.32	0.49	6.6					99.93
lnIdI378	I		48.76	0.12	0.55	43.39	0.42	5.85					99.09
lnIdI379	I		52.84	0.12	0.24	39.26	0.58	6.06					99.1
lnIdI380	I		51.2	0.15	0.14	42.11	0.41	5.39					99.4
lnIdI381	I		50.08	0.12	0.05	43.94	0.64	4.37					99.2
lnIdI382	I		52.24	0.13	0.12	36.08	0.28	10.52					99.37
lnIdI383	I		51.85	0.13	0.12	41.06	0.53	5.69					99.38
lnIdI384	I		54.98	0.14	1.23	32.19	0.33	10.36					99.23
lnIdI385	I		49.84	0.14	0.19	42.51	0.39	6.84					99.91
lnIdI386	I		53.69	0.15	0.32	37.78	0.36	7.19					99.49
lnIdI387	I		52.58	0.18	0.23	35.32	0.34	10.44					99.09
lnIdI388	I		50.81	0.14	0.35	40.99	0.36	6.66					99.31
lnIdI389	I		51.14	0.13	0.35	40.75	0.57	6.54					99.48
lnIdI390	I		50.03	0.16	0.12	43.2	0.4	5.13					99.04
lnIdI391	I		51.11	0.13	0.27	41.77	0.58	5.6					99.46
lnIdI392	I		52.23	0.13	0.33	37.17	0.33	9.03					99.22
lnIdI393	I		50.36	0.13	0.08	42.54	0.49	5.77					99.37
lnIdI394	I		51.02	0.15	0.01	43.24	0.53	4.75					99.7
lnIdI395	I		53.44	0.13	1.14	35.28	0.29	9.12					99.4
lnIdI396	I		48.98	0.16	0.09	44.44	0.48	5.39					99.54
lnIdI397	I		50.96	0.12	0	41.75	0.61	6.06					99.5
lnIdI398	I		50.75	0.13	1.09	41.28	0.43	5.84					99.52
lnIdI399	I		50.28	0.14	0.02	42.55	0.57	5.73					99.29
lnIdI400	I		51.55	0.47	1.24	38.57	0.42	7.09					99.34
lnIdI401	I		54.41	0.44	1.21	32.55	0.48	10.2					99.29
lnIdI401	I		49.17	0.14	0	44.75	4.38	1.91					100.35
lnIdI402	I		51.95	0.49	2.23	34.83	0.51	9.28					99.29
lnIdI402	I		50.12	0.06	0.02	43.17	4.37	3.09					100.83
lnIdI403	I		50.98	0.02	0.01	39.99	4.96	3.51					99.47
lnIdI403	I		54.88	0.44	1.77	30.05	0.47	12.16					99.77
lnIdI404	I		50.02	0.03	0	44.69	4.2	1.3					100.24
lnIdI405	I		50.65	0.1	0.05	42.53	4.37	3.23					100.93
lnIdI405	I		49.87	0.09	0.06	46.66	2.8	0.54					100.02
lnIdI406	I		49.94	0.08	0.03	44.84	4.15	1.54					100.58
lnIdI406	I		49.54	0.08	0	46.9	3.47	0.86					100.85
lnIdI407	I		53.81	0.15	0.02	31.67	3.28	10.12					99.05
lnIdI407	I		48.94	0.06	0	47.15	3.54	1.17					100.86
lnIdI408	I		53.58	0.07	0.01	34.13	3.35	8.12					99.26
lnIdI408	I		49.33	0.09	0	46.46	3.48	0.98					100.34
lnIdI409	I		49.36	0.77	0.43	33.93	11.68	3.03					99.2
lnIdI409	I		49.87	0.09	0.01	46.88	2.94	0.75					100.54
lnIdI410	I		48.11	0.38	0.51	41.82	0.49	8.32					99.63
lnIdI410	I		49.29	0.06	0	48.73	2.61	0.27					100.96
lnIdI411	I		54.1	0.54	2.34	30.72	0.63	11.12					99.45
lnIdIlnI	I		52.93	0.48	0.37	34.77	0.23	10.67					99.45

## Sheet: LenChr
		Table 1-5. Microprobe analyses of chromites from Leningrad pipe (wt.%)
Sample			TiO2	Al2O3	Cr2O3	FeO	MnO	MgO	NiO	V2O5		Total
					Chromites
Lng002	S		0.01	44.72	25.26	11.6	0.13	17.37				99.09
Lng003	S		0.02	27.51	42.1	16.61	0.24	12.92				99.4
Lng004	S		0.02	37.82	31.28	14.53	0.16	15.45				99.26
Lng005	S		0.03	18.35	54.82	15.61	0.23	10.16				99.2
Lng006	S		0.18	11.44	57.36	21.05	0.31	9.03				99.37
Lng007	S		0.18	11.7	57.48	20.87	0.28	8.87				99.38
Lng008	S		0.68	8.23	58.14	21.84	0.26	9.92				99.07
Lng009	S		1.37	14.52	32.38	37.27	0.19	13.41				99.14
Lng09	S		0.02	66.23	0.12	8.34	0.04	24.51				99.26
Lng88	S		0.01	67.41	0.09	8.03	0.05	23.64				99.23
LNGS001	S		2.58	0.72	43.3	47.69	0.55	4.31				99.15
LNGS002	S		5.54	0.74	42.77	48.82	0.61	3.91				102.39
LNGS003	S		0.36	9.81	58.18	19.58	0.34	11				99.27
LNGS004	S		1.18	8.04	57.92	20.94	0.32	10.88				99.28
LNGS005	S		0.08	3.44	59.19	29.95	0.51	6.06				99.23
LNGS008	S		0.06	33	35.62	17.36	0.31	12.92				99.27
LNGS009	S		1.83	5.69	59.38	21.87	0.43	10.27				99.47
LNGS010	S		0.09	3.44	58.83	30.11	0.53	6.04				99.04
LNGS011	S		1.21	8.55	58.43	19.75	0.52	10.9				99.36
LNGS012	S		2.45	6.16	58.08	21.85	0.46	10.36				99.36
LNGS013	S		2.28	8.96	57.41	20.91	0.36	9.32				99.24
LNGS014	S		2.3	8.73	57.3	21.09	0.37	9.71				99.5
LNGS015	S		0.68	0.74	56.81	35.4	0.56	5.12				99.31
LNGS016	S		2.42	8.8	56.79	19.03	0.31	11.68				99.03
LNGS017	S		2.1	8.92	56.55	22.22	0.36	9.14				99.29
LNGS018	S		1.99	7.52	56.52	20.72	0.36	12.24				99.35
LNGS019	S		2.57	8.69	56.46	20.66	0.37	10.46				99.21
LNGS020	S		2.29	9.72	56.16	20.52	0.39	11.02				100.1
LNGS021	S		2.28	9.13	55.91	20.96	0.36	10.37				99.01
LNGS022	S		2.24	8.21	55.8	21.05	0.41	12.35				100.06
LNGS023	S		2.56	8.48	55.6	20.84	0.41	11.18				99.07
LNGS024	S		2.32	8.17	55.44	21.17	0.35	11.78				99.23
LNGS025	S		2.28	9.24	55.39	20.82	0.38	11.32				99.43
LNGS026	S		2.14	10.48	55.35	20.67	0.4	11.5				100.54
LNGS027	S		2.47	9.32	55.29	21	0.37	11.2				99.65
LNGS028	S		1.98	7.84	55.15	23.18	0.45	10.64				99.24
LNGS029	S		2.13	9.02	55.09	20.72	0.36	12.12				99.44
LNGS030	S		2.37	8.71	54.91	21.29	0.39	11.34				99.01
LNGS031	S		2.37	6.97	54.74	23.6	0.44	11.54				99.66
LNGS032	S		2.53	8.97	54.74	21.45	0.4	12.49				100.58
LNGS033	S		2.29	6.24	55.09	24.31	0.44	11.14				99.51
LNGS034	S		1.23	1.23	54.56	36.05	0.59	5.72				99.38
LNGS035	S		3.31	7.72	54.48	22.64	0.45	10.55				99.15
LNGS036	S		2.4	8.64	54.47	21.75	0.36	11.68				99.3
LNGS037	S		2.93	8.62	54.37	21.21	0.4	11.54				99.07
LNGS038	S		1.13	0.99	54.19	36.71	0.66	5.36				99.04
LNGS039	S		2.94	7.71	54.09	24.85	0.48	9.29				99.36
LNGS040	S		2.48	7.93	54	22.5	0.43	11.81				99.15
LNGS041	S		2.39	9.72	53.96	21.18	0.38	11.81				99.44
LNGS042	S		1.2	1.33	53.88	36.63	0.57	5.63				99.24
LNGS043	S		2.18	8.9	55.02	21.66	0.37	11.86				99.99
LNGS044	S		2.48	8.05	54.39	23.31	0.47	11.25				99.95
LNGS045	S		2.01	9.9	53.24	22.78	0.38	11.07				99.38
LNGS046	S		3.38	9.61	52.72	23.05	0.43	10.86				100.05
LNGS047	S		3.82	6.87	52.6	24.3	0.47	12.05				100.11
LNGS048	S		3.62	5.31	51.76	28.42	0.56	9.47				99.14
LNGS049	S		2.12	10	52.98	22.89	0.47	11.54				100
LNGS050	S		1.5	0.17	50.68	41.82	0.71	4.55				99.43
LNGS051	S		2.95	6.36	50.1	28.13	0.64	11.14				99.32
LNGS052	S		4.14	3.73	49.87	27.1	0.7	14.24				99.78
LNGS053	S		1.85	0.31	49.52	41.94	0.74	5.1				99.46
LNGS054	S		0.06	17.99	48.52	22.3	0.39	10.16				99.42
LNGS055	S		6.03	7.22	45.92	29.3	0.47	10.2				99.14
LNGS056	S		6.38	0.61	45.66	39.55	0.55	6.81				99.56
LNGS057	S		7.15	3.57	44.69	35.66	0.53	9.72				101.32
LNGS058	S		6.37	4.1	43.93	35.96	0.59	8.34				99.29
LNGS059	S		6.44	3.36	43.76	35.59	0.59	9.29				99.03
LNGS060	S		6.68	4.31	43.07	34.15	0.49	10.55				99.25
LNGS061	S		2.57	0.76	42.62	48.75	0.59	3.92				99.21
LNGS062	S		3.08	0.7	36.2	55.14	0.52	3.45				99.09
LNGS063	S		0.07	27.06	35.48	24.06	0.38	12.32				99.37
LNGS064	S		0.05	33.52	35.02	17.49	0.33	12.87				99.28
LNGS065	S		10.38	2.48	30.96	46.09	0.63	9.84				100.38
LNGS066	S		12.2	1.64	27.9	50.25	1.03	7.77				100.79
LNGS067	S		0.15	41.04	27.23	15.41	0.22	15.11				99.16
LNGS068	S		0.65	4.77	63.7	18.95	0.42	10.82				99.31
LNGS069	S		0.66	4.75	63.58	19.34	0.4	10.72				99.45
LNGS070	S		0.67	4.57	63.95	18.87	0.43	10.57				99.06
LNGS071	S		0.05	2.83	63.68	26.05	0.55	6.32				99.48
LNGS072	S		0.07	2.91	63.85	25.59	0.52	6.24				99.18
LNGS073	S		0.77	1.45	60.69	30.38	0.5	5.41				99.2
LNGS074	S		2.13	0.58	48.3	42.92	0.56	4.6				99.09
LNGS075	S		3.02	0.43	43.03	47.62	0.65	4.34				99.09
LNGS076	S		2.82	0.37	43.99	47.35	0.63	4.31				99.47
LNGS077	S		3.01	0.41	37.32	54.2	0.54	3.83				99.31
LNGS078	S		2.65	8.65	56.89	19.83	0.38	11.95				100.35
LNGS079	S		2.18	8.39	56.66	20.4	0.33	11.32				99.28
LNGS080	S		2.48	8.31	56.35	21.12	0.38	11.6				100.24
LNGS081	S		2.69	7.91	55.9	20.88	0.35	11.74				99.47
LNGS082	S		2.86	8.27	54.42	21.57	0.38	11.62				99.12
LNGS083	S		2.85	7.69	55.6	22.54	0.29	11.48				100.45
LNGS084	S		3.38	7.38	53.3	23.58	0.34	11.16				99.14
LNGS085	S		2.25	8.65	55.67	21.92	0.35	11.3				100.14
LNGS086	S		2.6	8.55	55.53	21.48	0.32	11.71				100.19
LNGS087	S		10.36	1.79	38	40.38	0.61	7.89				99.03
LNGS088	S		11.28	1.66	27.16	49.36	0.42	9.26				99.14
LNGS116	S		0.81	4.63	63	18.95	0.35	12.08				99.82
LNGS117	S		0.19	5.08	65.05	17.98	0.43	11.34				100.07
LNGS118	S		0.8	5.21	62.72	19.31	0.34	11.75				100.13
LNGS119	S		0.18	5.32	65.08	18.27	0.4	11.52				100.77
LNGS120	S		0.76	5.52	64.9	16.81	0.33	12.69				101.01
LNGS121	S		0	5.6	65.22	16.41	0.36	12.53				100.12
LNGS122	S		0.13	5.91	64.9	17.13	0.33	12.61				101.01
LNGS123	S		0.08	5.93	64.46	17.67	0.36	12.14				100.64
LNGS124	S		0.8	5.93	62.25	18.84	0.33	11.99				100.14
LNGS125	S		0.11	5.89	65.47	16.62	0.38	11.37				99.84
LNGS126	S		0.28	5.97	63.89	15.87	0.34	13.27				99.62
LNGS127	S		0.28	6.01	64.24	15.56	0.34	13.43				99.86
LNGS128	S		0.21	5.87	63.05	18.09	0.35	11.61				99.18
LNGS129	S		0.55	5.92	61.14	19.33	0.39	11.99				99.32
LNGS130	S		0.27	6.02	63.88	15.63	0.34	13.11				99.25
LNGS131	S		0.06	6.17	64.62	18.71	0.36	11.75				101.67
LNGS132	S		0.1	5.96	63.06	18.03	0.36	11.53				99.04
LNGS133	S		0.02	6.21	65.64	16.37	0.34	12.64				101.22
LNGS134	S		0.09	6.09	62.33	18.25	0.35	12.01				99.12
LNGS135	S		1.11	6.22	63.34	18.17	0.37	11.83				101.04
LNGS136	S		0.09	6.15	62.83	17.96	0.36	11.82				99.21
LNGS137	S		0.07	6.32	65.04	17.67	0.37	11.78				101.25
LNGS138	S		0.08	6.36	64.82	17.69	0.34	11.93				101.22
LNGS139	S		0.34	6.23	63.7	17.81	0.33	11.12				99.53
LNGS140	S		0.07	6.27	63.31	17.58	0.31	11.82				99.36
LNGS141	S		0.1	6.26	63.28	17.25	0.36	11.95				99.2
LNGS142	S		0.08	6.42	65.13	17.83	0.37	11.89				101.72
LNGS143	S		0.25	6.49	64.27	17.05	0.33	12.68				101.07
LNGS144	S		0.08	6.52	64.88	17.81	0.35	12				101.64
LNGS145	S		0.08	6.51	64.47	17.77	0.35	11.93				101.11
LNGS146	S		0.08	6.4	62.36	18.33	0.34	11.8				99.31
LNGS147	S		0.07	6.61	65.02	17.94	0.33	11.85				101.82
LNGS148	S		0.54	6.42	61.03	19.03	0.34	11.99				99.35
LNGS149	S		0.09	6.63	63.49	17.95	0.38	11.99				100.53
LNGS150	S		0.13	6.53	61.6	18.19	0.34	12.43				99.22
LNGS151	S		0.09	6.55	62.3	17.45	0.39	12.34				99.12
LNGS152	S		0.07	6.67	63.41	17.9	0.34	12.08				100.47
LNGS153	S		0.09	6.63	63.23	17.1	0.37	12.08				99.5
LNGS154	S		1.11	6.66	60.91	18.55	0.37	11.59				99.19
LNGS155	S		0.08	6.8	64.24	17.56	0.36	11.57				100.61
LNGS156	S		0.17	6.77	64	15.97	0.32	12.29				99.52
LNGS157	S		0.08	6.81	63.38	17.21	0.36	11.96				99.8
LNGS158	S		0.54	6.84	62.81	18.1	0.36	11.8				100.45
LNGS159	S		0.07	6.88	63.38	17.57	0.31	12.17				100.38
LNGS160	S		0.08	6.95	64.21	17.58	0.37	12.1				101.29
LNGS161	S		0	6.83	63.26	17.44	0.34	11.72				99.59
LNGS162	S		0	7.01	64.39	15.42	0.37	13.45				100.64
LNGS163	S		0.09	6.85	63.21	16.41	0.31	12.6				99.47
LNGS164	S		0.09	6.95	63.59	17.6	0.34	11.95				100.52
LNGS165	S		0.57	6.93	61.35	17.52	0.35	12.28				99
LNGS166	S		0.09	7	62.7	17.55	0.3	12.01				99.65
LNGS167	S		0.08	7.12	62.92	17.64	0.28	12.07				100.11
LNGS168	S		0.04	7.04	63.53	16.01	0.31	12.16				99.09
LNGS169	S		0.08	7.12	62.06	17.82	0.33	12.03				99.44
LNGS170	S		0.2	7.32	64.95	16.08	0.34	12.59				101.48
LNGS171	S		0.05	7.33	65.46	15.65	0.34	12.59				101.42
LNGS172	S		0.08	7.28	63.51	17.5	0.35	11.83				100.55
LNGS173	S		0.44	7.09	58.93	20.89	0.38	11.7				99.43
LNGS174	S		0.09	7.32	63.37	17.44	0.31	11.93				100.46
LNGS175	S		0	7.34	61.61	16.77	0.37	13.16				99.25
LNGS176	S		0.41	8.3	59.01	20.83	0.36	11.01				99.92
LNGS177	S		0.58	8.36	59.91	17.85	0.35	12.21				99.26
LNGS178	S		0.23	8.64	61.21	16.73	0.37	12.28				99.46
LNGS179	S		0.46	8.72	56.78	24.98	0.4	10.1				101.44
LNGS180	S		0.7	8.65	60.01	17.27	0.35	12.34				99.32
LNGS181	S		0	8.91	63.65	16.84	0.35	12.08				101.83
LNGS182	S		0.25	9.12	60.72	17.32	0.37	12.26				100.04
LNGS183	S		0.1	9.12	60.35	16.32	0.34	13.05				99.28
LNGS184	S		0.19	9.27	58.61	18.46	0.33	12.26				99.12
LNGS185	S		0.09	9.73	63.74	15.26	0.34	12.72				101.88
LNGS186	S		0.02	9.91	62.57	15.44	0.33	12.96				101.23
LNGS187	S		0.14	10	62.95	15.03	0.29	13.13				101.54
LNGS188	S		0.32	10.03	57.28	21.02	0.32	12.3				101.27
LNGS189	S		0.18	9.97	59.34	17.14	0.34	12.97				99.94
LNGS190	S		0.3	9.87	55.69	20.58	0.31	12.34				99.09
LNGS191	S		0.07	10.15	62.49	15.54	0.3	12.73				101.28
LNGS192	S		0.55	11.66	55.92	17.91	0.34	12.75				99.13
LNGS193	S		0.03	11.87	60.05	14.21	0.3	13.74				100.2
LNGS194	S		0.06	11.9	59.83	15.51	0.34	12.98				100.62
LNGS195	S		0.45	11.98	55.53	18.8	0.32	12.3				99.38
LNGS196	S		0.19	13.32	53.24	19.68	0.29	13.11				99.83
LNGS197	S		0.19	13.85	53	19.63	0.29	13.35				100.31
LNGS198	S		0.19	14.07	54.22	16.77	0.31	13.83				99.39
LNGS199	S		0.22	14.51	56	15.66	0.29	14.26				100.94
LNGS200	S		0	14.32	56.57	14.36	0.28	13.86				99.39
LNGS201	S		0.11	14.8	56.29	15.02	0.32	12.88				99.42
LNGS202	S		0.08	14.81	55.46	16.47	0.3	12.25				99.37
LNGS203	S		0.81	15.37	54.98	15.87	0.29	14.27				101.59
LNGS204	S		0.23	15.68	55.93	15.49	0.27	13.96				101.56
LNGS205	S		0.06	15.78	55.25	15.06	0.27	14.4				100.82
LNGS206	S		0.22	15.31	52.91	18.18	0.36	12.18				99.16
LNGS207	S		0.06	15.83	54.2	15.29	0.29	13.8				99.47
LNGS208	S		0.09	16.48	53.42	18.35	0.35	11.76				100.45
LNGS209	S		0.23	16.82	52.71	15.27	0.23	14.21				99.47
LNGS210	S		0.3	16.79	50.53	22.16	0.38	11.28				101.44
LNGS211	S		0.01	17.13	53.01	15.03	0.32	13.66				99.16
LNGS212	S		0.02	17.99	52.2	16.43	0.35	12.75				99.74
LNGS213	S		0.25	17.79	47.44	21.86	0.32	11.73				99.39
LNGS214	S		0.03	18.44	53.5	17.68	0.33	11.82				101.8
LNGS215	S		0.06	17.81	49.72	20.75	0.3	10.66				99.3
LNGS216	S		0.06	18.76	51.5	17.34	0.29	12.41				100.36
LNGS217	S		0.55	20.02	44.59	18.16	0.25	15.68				99.25
LNGS218	S		0.39	21.42	45.13	17.47	0.29	15.75				100.45
LNGS219	S		0.08	20.93	48.51	16.49	0.32	13.32				99.65
LNGS220	S		0.09	21.66	48.81	17.54	0.33	12.84				101.27
LNGS221	S		0.07	21.73	47.32	17.47	0.28	12.49				99.36
LNGS222	S		0.09	21.75	46.47	17.38	0.33	13.06				99.08
LNGS223	S		0.31	22.18	46.06	16.76	0.31	13.42				99.04
LNGS224	S		0.18	23.54	47.97	11.84	0.28	15.68				99.49
LNGS225	S		0.49	24.37	45.68	13.74	0.22	16.19				100.69
LNGS226	S		0.09	24.05	47.67	16.55	0.3	12.81				101.47
LNGS227	S		0.08	25.73	44.36	17.56	0.27	12.85				100.85
LNGS228	S		0.07	25.56	44.17	16.84	0.28	12.42				99.34
LNGS229	S		0.04	26.86	42.87	12.63	0.24	16.75				99.39
LNGS230	S		0.03	26.69	42.49	18.34	0.29	12.14				99.98
LNGS231	S		0.34	27.41	42.15	14.28	0.28	14.95				99.41
LNGS232	S		0.23	30.98	37.88	16.44	0.24	14.29				100.06
LNGS233	S		0.02	30.76	36.95	16.91	0.25	14.42				99.31
LNGS234	S		0.23	31.9	37.83	15.42	0.32	14.26				99.96
LNGS235	S		0	31.9	33.67	19.14	0.28	14.2				99.19
LNGS236	S		0	33.19	34.39	15.64	0.24	15.59				99.05
LNGS237	S		0	33.03	35.41	15.9	0.29	14.75				99.38
LNGS238	S		0	33.13	35.94	16.34	0.24	14.05				99.7
LNGS239	S		0	32.93	34.61	16.73	0.23	14.78				99.28
LNGS240	S		0	33.63	33.51	17.95	0.23	14.82				100.14
LNGS241	S		0	33.99	35.04	15.98	0.21	14.8				100.02
LNGS242	S		0	34.14	32.27	18.49	0.25	14.55				99.7
LNGS243	S		0	33.48	34.32	16.62	0.23	14.76				99.41
LNGS244	S		0	34.27	35.43	15.52	0.22	14.64				100.08
LNGS245	S		0	34.53	34.44	15.41	0.24	15.06				99.68
LNGS246	S		0.05	35.34	33.09	12.45	0.21	18.18				99.32
LNGS247	S		0.13	35.27	35.33	14.94	0.23	15.44				101.34
LNGS248	S		0	35.11	35.44	15.62	0.22	14.85				101.24
LNGS249	S		0.12	35.54	31.7	13.19	0.18	18.37				99.1
LNGS250	S		0	35.45	35.04	15.47	0.23	15.2				101.39
LNGS251	S		0	35.29	33.75	15.6	0.22	15.42				100.28
LNGS252	S		0	35.14	30.82	18.61	0.2	15.04				99.81
LNGS253	S		0	34.96	33.23	15.41	0.22	15.26				99.08
LNGS254	S		0	35.62	35.08	15.52	0.22	14.91				101.35
LNGS255	S		0	35.28	34.21	15.55	0.24	14.82				100.1
LNGS256	S		0.02	35.61	34.55	15.46	0.2	14.87				100.71
LNGS257	S		0	35.36	31.53	15.78	0.24	16.2				99.11
LNGS258	S		0	35.29	33.81	15.63	0.24	14.56				99.53
LNGS259	S		0	35.61	32.87	15.48	0.22	15.37				99.55
LNGS260	S		0	35.67	34.44	15.62	0.24	14.49				100.46
LNGS261	S		0.12	36.65	32.25	12.6	0.2	18.23				100.05
LNGS262	S		0	35.65	32.63	15.68	0.26	15.11				99.33
LNGS263	S		0.01	35.66	32.85	15.64	0.17	15.05				99.38
LNGS264	S		0	36.42	32.69	15.38	0.21	15.61				100.31
LNGS265	S		0.13	36.64	32.94	12.26	0.21	17.1				99.28
LNGS266	S		0.04	36.51	33.24	14.01	0.21	15.81				99.82
LNGS267	S		0.15	38.03	31.6	10.82	0.16	19.68				100.44
LNGS268	S		0	37.64	29.62	18.27	0.21	14.56				100.3
LNGS269	S		0	36.84	33.4	14.85	0.2	15.08				100.37
LNGS270	S		0	36.74	32.92	15.67	0.23	14.72				100.28
LNGS271	S		0.11	38.09	32.22	13.02	0.21	17.97				101.62
LNGS272	S		0.03	36.42	31.05	16.48	0.17	15.07				99.22
LNGS273	S		0	37	32.73	15.17	0.2	14.69				99.79
LNGS274	S		0	37.41	31.4	15.23	0.19	15.61				99.84
LNGS275	S		0	37.33	30.99	14.8	0.18	15.92				99.22
LNGS276	S		0	37.99	32.17	14.84	0.22	15.51				100.73
LNGS277	S		0	37.81	31.99	15.12	0.2	15.18				100.3
LNGS278	S		0	37.59	30.9	15.2	0.2	15.46				99.35
LNGS279	S		0	38.6	31.03	14.61	0.2	15.78				100.22
LNGS280	S		0	38.45	30.12	14.52	0.19	16.16				99.44
LNGS281	S		0.09	38.97	31.5	13.76	0.22	16.28				100.82
LNGS282	S		0	39.16	30.89	14.43	0.21	15.88				100.57
LNGS283	S		0.15	40.13	31.04	12.04	0.19	17.72				101.27
LNGS284	S		0	39.16	30.79	14.35	0.2	15.49				99.99
LNGS285	S		0.02	39.32	30.02	14.85	0.23	15.6				100.04
LNGS286	S		0	39.08	28.6	15.97	0.21	16.16				100.02
LNGS287	S		0	39.53	27.83	14.53	0.16	17.21				99.26
LNGS288	S		0	39.58	29.53	14.3	0.21	16.15				99.77
LNGS289	S		0	39.47	29.16	14.16	0.21	16.3				99.3
LNGS290	S		0.02	39.78	29.88	13.14	0.22	16.62				99.66
LNGS291	S		0	40.01	30.12	14.27	0.18	16.03				100.61
LNGS292	S		0	40.08	29.74	14.51	0.22	15.89				100.44
LNGS293	S		0	39.86	29.46	14.03	0.19	15.93				99.47
LNGS294	S		0	40.27	29.57	14.55	0.22	15.93				100.54
LNGS295	S		0	40.06	28.47	14.37	0.22	16.35				99.47
LNGS296	S		0.13	40.67	29.31	12.15	0.2	17.4				99.86
LNGS297	S		0.24	41.55	28.55	11.33	0.19	19.03				100.89
LNGS298	S		0	40.45	28.99	13.95	0.21	16.31				99.91
LNGS299	S		0	40.34	26.98	14.62	0.21	17.36				99.51
LNGS300	S		0	40.79	29.57	13.89	0.2	16.07				100.52
LNGS301	S		0	41.16	29.04	14.12	0.18	16.11				100.61
LNGS302	S		0	41.13	28.92	13.72	0.23	16.11				100.11
LNGS303	S		0.01	40.76	27.68	13.97	0.16	16.83				99.41
LNGS304	S		0	40.65	28.45	14.14	0.2	16.1				99.54
LNGS305	S		0	40.61	27.94	14.56	0.22	16.06				99.39
LNGS306	S		0	42.59	27.46	13.74	0.18	16.32				100.29
LNGS307	S		0	40.47	26.89	15.15	0.17	16.61				99.29
LNGS308	S		0.14	41.13	28.49	12.19	0.2	17.14				99.29
LNGS309	S		0	42.06	27.57	14.15	0.19	16.4				100.37
LNGS310	S		0	41.67	28.76	13.72	0.2	16.48				100.83
LNGS311	S		0	42.79	27.05	13.47	0.16	16.45				99.92
LNGS312	S		0	43.42	26.92	13.57	0.18	16.65				100.74
LNGS313	S		0.05	41.96	26.48	13.01	0.22	17.38				99.1
LNGS314	S		0.06	42.7	27.72	12.85	0.15	17.18				100.66
LNGS315	S		0.08	42.74	27.32	12.88	0.18	17.38				100.58
LNGS316	S		0.06	42.73	26.19	12.58	0.17	17.97				99.7
LNGS317	S		0.05	42.71	26.57	12.78	0.17	17.31				99.59
LNGS318	S		0.03	43.2	26.87	12.69	0.18	17.02				99.99
LNGS319	S		0.04	43.08	25.36	13.48	0.18	17.23				99.37
LNGS320	S		0.14	43.58	26.07	11.19	0.17	17.91				99.06
LNGS321	S		0.06	43.42	24.87	13.26	0.2	17.43				99.24
LNGS322	S		0.07	44.93	25.9	12.5	0.14	17.78				101.32
LNGS323	S		0.06	58.67	10.18	11.5	0.12	19.44				99.97
LNGS324	S		0.07	54.03	16.25	11.16	0.11	19.63				101.25
LNGS325	S		0.07	57.9	10.68	11.39	0.1	19.9				100.04
LNGS326	S		0.04	55.55	10.64	13.3	0.11	19.74				99.38
LNGS327	S		0.08	54.11	16.66	8.43	0.06	21.13				100.47
LNGS328	S		0.71	4.82	63.14	19.92	0.3	10.21				99.1
LNGS329	S		0.31	4.95	63.98	18.99	0.27	10.89				99.39
LNGS330	S		0.03	4.96	66.16	17.68	0.31	10.63				99.77
LNGS331	S		0.02	5.05	65.57	17.71	0.3	11.28				99.93
LNGS332	S		0.33	5.07	64.23	18.26	0.27	11.23				99.39
LNGS333	S		0.03	5.19	64.12	18.06	0.28	11.4				99.08
LNGS334	S		0.93	5.22	60.48	22.17	0.23	11.02				100.05
LNGS335	S		0.31	5.25	64.52	18.78	0.28	10.49				99.63
LNGS336	S		0.3	5.33	64.9	19.19	0.27	10.88				100.87
LNGS337	S		0.6	5.9	63.22	19.7	0.29	10.46				100.17
LNGS338	S		0.14	5.44	61.78	20.32	0.29	11.51				99.48
LNGS339	S		0.67	5.45	65.05	18.02	0.27	11.17				100.63
LNGS340	S		0.11	5.46	62.86	19.65	0.26	11.36				99.7
LNGS341	S		0.25	5.46	63.45	20.5	0.28	10.42				100.36
LNGS342	S		0.12	5.57	60.84	21.32	0.25	11.41				99.51
LNGS343	S		0.13	5.58	63.46	18.6	0.26	11.44				99.47
LNGS344	S		0.04	5.82	62.68	19.62	0.24	10.88				99.28
LNGS345	S		0.59	5.82	63.83	19.25	0.28	10.27				100.04
LNGS346	S		0.12	5.93	63.14	18.21	0.28	11.5				99.18
LNGS347	S		0.11	5.98	63.91	19.11	0.27	10.1				99.48
LNGS348	S		0.13	5.99	60.72	20.55	0.27	11.5				99.16
LNGS349	S		0.1	6	63.63	19.23	0.26	11.36				100.58
LNGS350	S		0.12	6.01	62.49	18.92	0.28	11.43				99.25
LNGS351	S		0.11	6.09	64.8	18.72	0.26	9.9				99.88
LNGS352	S		0.01	6.21	65.63	16.95	0.27	10.39				99.46
LNGS353	S		0.26	6.21	60.23	23.08	0.27	9.13				99.18
LNGS354	S		0.68	6.25	62.77	20.85	0.29	10.32				101.16
LNGS355	S		0.03	6.26	63.5	18.93	0.27	10.74				99.73
LNGS356	S		0.43	6.28	61.95	18.9	0.29	11.46				99.31
LNGS357	S		0.11	6.34	64.63	17.83	0.28	10.41				99.6
LNGS358	S		0.08	6.55	65.58	15.52	0.23	11.25				99.21
LNGS359	S		1.15	6.61	61.41	18.58	0.24	11.21				99.2
LNGS360	S		0.05	6.62	65.53	16.92	0.29	10.88				100.29
LNGS361	S		0.06	6.72	65.82	16.21	0.31	11.19				100.31
LNGS362	S		0.02	7.03	63.98	16.76	0.3	11.55				99.64
LNGS363	S		0.41	7.28	62.25	18.28	0.25	11.09				99.56
LNGS364	S		0.81	7.82	61.59	17.29	0.27	12.07				99.85
LNGS365	S		0.47	8.12	60.27	17.83	0.27	12.36				99.32
LNGS366	S		0.02	8.35	62.98	17.2	0.27	10.67				99.49
LNGS367	S		0.3	8.43	63.37	15.45	0.25	11.65				99.45
LNGS368	S		0.1	8.58	61.02	18.35	0.3	10.78				99.13
LNGS369	S		0.1	9.51	60.29	17.14	0.26	12.01				99.31
LNGS370	S		0.33	9.65	59.5	19.52	0.25	10.75				100
LNGS371	S		0.2	10.16	60.58	17.18	0.23	11.09				99.44
LNGS372	S		0.28	10.93	58.2	18.56	0.24	10.98				99.19
LNGS373	S		0.14	13.16	54.08	20	0.25	11.46				99.09
LNGS374	S		0.16	14.72	55.4	18.02	0.23	11.47				100
LNGS375	S		0.31	14.76	54.86	17.63	0.27	11.71				99.54
LNGS376	S		0.27	15.08	53.49	18.09	0.21	12.11				99.25
LNGS377	S		0.45	15.58	51.5	17.82	0.21	13.63				99.19
LNGS378	S		0.46	15.78	53.27	16.45	0.2	13.18				99.34
LNGS379	S		0.29	16.07	53.31	17.4	0.25	11.88				99.2
LNGS380	S		1.11	16.44	47.93	21.58	0.23	12.25				99.54
LNGS381	S		0.13	16.86	49.78	22.12	0.23	11.02				100.14
LNGS382	S		0.3	17.21	52.57	17.67	0.27	11.27				99.29
LNGS383	S		0.21	17.89	53.26	16.06	0.27	12.6				100.29
LNGS384	S		0.05	21.48	44.99	20.66	0.22	13.11				100.51
LNGS385	S		0.15	24.86	44.26	14.91	0.19	14.73				99.1
LNGS386	S		0.11	28.78	40.95	16.92	0.2	12.76				99.72
LNGS387	S		0.11	28.78	41.15	17.01	0.2	12.76				100.01
LNGS388	S		0.04	30.3	36.7	18.14	0.2	13.87				99.25
LNGS389	S		0.02	31.44	33.44	19.64	0.18	14.45				99.17
LNGS390	S		0.02	32.1	33.83	18.96	0.19	14.08				99.18
LNGS391	S		0.03	32.66	35.03	19.27	0.19	12.49				99.67
LNGS392	S		0.04	32.99	34.82	17.56	0.19	13.8				99.4
LNGS393	S		0.05	33.04	34.27	17.57	0.22	13.94				99.09
LNGS394	S		0.02	33.16	34.8	17.02	0.2	13.88				99.08
LNGS395	S		0.02	33.3	32.84	18.86	0.2	14.11				99.33
LNGS396	S		0.04	33.61	33.98	18.61	0.2	12.92				99.36
LNGS397	S		0.02	33.71	32.43	18.44	0.2	14.33				99.13
LNGS398	S		0.03	33.77	34.03	17.84	0.21	13.18				99.06
LNGS399	S		0.04	33.87	34.22	16.91	0.21	14.04				99.29
LNGS400	S		0.02	33.97	34.13	17.01	0.21	14.03				99.37
LNGS401	S		0.02	33.98	34.37	17.17	0.21	13.75				99.5
LNGS402	S		0.02	34.75	33.61	17.61	0.19	14.36				100.54
LNGS403	S		0.03	34.89	32.44	17.32	0.18	14.2				99.06
LNGS404	S		0.01	35.26	31.07	18.05	0.17	14.92				99.48
LNGS405	S		0.02	36.11	32.39	15.81	0.18	14.71				99.22
LNGS406	S		0.03	35.69	32.57	16.66	0.19	14.3				99.44
LNGS407	S		0.01	35.72	32.72	17.08	0.21	13.68				99.42
LNGS408	S		0.01	37.3	29.01	17.11	0.14	15.7				99.27
LNGS409	S		0	37	31.45	16.69	0.15	13.81				99.1
LNGS410	S		0.54	37.01	30.29	13.66	0.15	17.46				99.11
LNGS411	S		0.53	37.21	29.84	13.82	0.16	17.92				99.48
LNGS412	S		0.05	37.25	31.93	17.13	0.16	13.55				100.07
LNGS413	S		0.04	37.26	30.81	16.91	0.17	14.08				99.27
LNGS414	S		0.01	37.95	28.69	17.54	0.14	15.17				99.5
LNGS415	S		0	38.39	30.1	15.61	0.17	15.31				99.58
LNGS416	S		0.01	38.56	27.6	17.39	0.16	15.45				99.17
LNGS417	S		0.01	39.66	28.64	15.61	0.17	15.26				99.35
LNGS418	S		0.02	40.25	26.82	16.54	0.16	16.37				100.16
LNGS419	S		0.01	40.08	28.14	16.03	0.17	14.8				99.23
LNGS420	S		0.01	40.13	27.93	14.91	0.16	15.96				99.1
LNGS421	S		0	40.29	28.31	15.79	0.13	14.53				99.05
LNGS422	S		0	40.38	27.09	16.1	0.15	15.59				99.31
LNGS423	S		0.09	40.74	26.21	15.61	0.15	16.68				99.48
LNGS424	S		0.07	42.16	25.72	14.56	0.11	16.87				99.49
LNGS425	S		1.81	5.64	56.51	24.45	0.35	10.58				99.34
LNGS426	S		1.62	5.86	59.37	24.24	0.37	10.36				101.82
LNGS427	S		2.18	5.87	56.19	22.97	0.32	11.77				99.3
LNGS428	S		2.64	6.22	57.82	22.35	0.41	11.41				100.85
LNGS429	S		2.09	6.32	57.66	23.55	0.35	10.89				100.86
LNGS430	S		2.02	6.89	58.04	19.9	0.34	12.29				99.48
LNGS431	S		2.65	7.14	59.22	17.51	0.24	12.4				99.16
LNGS432	S		1.86	7.95	56.76	19.32	0.37	12.9				99.16
LNGS433	S		2.26	8.45	55	22.24	0.33	12.25				100.53
LNGS434	S		2.77	8.2	51.85	24.03	0.37	11.84				99.06
LNGS435	S		2.36	8.29	57.06	21.01	0.25	11.4				100.37
LNGS436	S		2.39	8.78	54.36	21.45	0.33	12.45				99.76
LNGS437	S		2.59	8.82	53.54	21.63	0.26	12.28				99.12
LNGS438	S		2.31	9.24	56.23	19.43	0.34	13.83				101.38
LNGS439	S		2.12	9.16	53.33	21.76	0.33	12.57				99.27
LNGS440	S		2.35	9.29	53.86	20.05	0.35	13.14				99.04
LNGS441	S		2.05	9.65	56	20.25	0.35	12.76				101.06
LNGS442	S		2.47	9.69	53.51	20.88	0.38	13.18				100.11
LNGS443	S		2.56	11.71	52.23	20.54	0.32	13.18				100.54
LNGS444	S		2.83	11.98	50.65	21.34	0.36	13.23				100.39
LNGS445	S		2.56	4.52	58.62	22.73	0.26	10.44				99.13
LNGS446	S		3.24	5.44	52.05	27.58	0.3	11.72				100.33
LNGS447	S		3.25	5.25	56.45	23.7	0.32	11.66				100.63
LNGS448	S		3.28	5.34	56.5	22.83	0.3	10.86				99.11
LNGS449	S		3.35	5.34	54.93	23.68	0.32	11.96				99.58
LNGS450	S		3.36	5.94	55.41	22.43	0.37	11.86				99.37
LNGS451	S		3.78	5.13	54.87	24.12	0.25	12.39				100.54
LNGS452	S		1.6	12.07	50.35	25.13	0.33	10.45				99.93
LNGS453	S		1.75	13.8	50.82	21.44	0.35	12.28				100.44
LNGS454	S		1.72	15.09	47.86	20.84	0.29	13.42				99.22
LNGS455	S		3.08	21.9	33.11	25.4	0.4	15.38				99.27
LNGS456	S		0.4	6.14	58.65	22.39	0.29	11.45				99.32
LNGS457	S		0.36	8.21	56.17	23.52	0.24	10.78				99.28
LNGS458	S		1.85	6.99	56.8	21.82	0.4	11.36				99.22
LNGS459	S		1.89	7.4	57.13	20.41	0.38	12.18				99.39
LNGS460	S		2.34	7.58	55.19	21.66	0.39	12.15				99.31
LNGS461	S		2.83	7.83	53.94	23.32	0.45	11.3				99.67
LNGS462	S		2.53	8.8	55.88	23.34	0.43	11.72				102.7
LNGS463	S		2.24	9.06	54.81	20.99	0.37	11.75				99.22
LNGS464	S		2.36	9.14	54.32	19.98	0.34	13.22				99.36
LNGS465	S		0.95	1.28	59.36	28.66	0.46	8.51				99.22
LNGS466	S		0.98	2.05	63.14	25.51	0.32	8				100
LNGS467	S		1	1.73	58.74	30.4	0.4	7.24				99.51
LNGS468	S		0.37	1.32	58.13	33.34	0.55	5.78				99.49
LNGS469	S		0.42	1.39	58.36	32.99	0.55	5.8				99.51
LNGS470	S		1.51	1.66	52.13	39.48	0.52	5.23				100.53
LNGS471	S		2.67	0.79	40.55	50.43	0.56	4.28				99.28
LNGS472	S		2.7	0.12	40.17	54.23	0.45	3.93				101.6
LNGS473	S		2.87	0.28	38	54.54	0.42	4.15				100.26
LNGS474	S		2.77	0.29	44.67	47.7	0.5	3.91				99.84
LNGS475	S		3.08	0.32	42.21	50.81	0.46	3.86				100.74
LNGS478	S		0.65	1.32	54.51	35.95	0.66	5.98				99.07
LNGS479	S		0.33	1.46	60.37	30.87	0.55	5.48				99.06
LNGS480	S		1.14	1.89	54.1	35.59	0.63	5.98				99.33
LNGS481	S		1.73	0.7	52.68	39.61	0.71	4.67				100.1
LNGS482	S		2.29	0.33	50.19	43.09	0.7	4.48				101.08
LNGS483	S		1.81	0.68	52.73	39.54	0.67	4.74				100.17
LNGS484	S		4.37	11.43	42.82	25.87	0.42	15.46				100.37
LNGS485	S		4.88	7.89	44.77	27.12	0.43	14.03				99.12
LNGS486	S		4.33	5.47	51.76	25.42	0.32	11.95				99.25
LNGS487	S		4.28	5.86	50.85	26.35	0.34	11.63				99.31
LNGS488	S		4.7	6.25	50.42	25.59	0.3	12.05				99.31
LNGS489	S		4.53	5.87	52.76	26.2	0.38	11.62				101.36
LNGS490	S		4.34	6.24	51.84	26.68	0.32	11.56				100.98
LNGS491	S		4.24	6.46	51.5	25.95	0.31	11.29				99.75
LNGS492	S		4.35	6.4	52.27	26.13	0.35	11.41				100.91
LNGS493	S		4.03	10.48	47.7	26.16	0.41	12.53				101.31
LNGS494	S		4.41	7.07	51.94	25.94	0.33	11.53				101.22
LNGS495	S		4.38	6.51	52.04	26.17	0.32	11.18				100.6
LNGS496	S		6.18	4.61	45.46	32.58	0.45	11.33				100.61
LNGS497	S		7.31	3.74	42.41	36.13	0.61	9.98				100.18
LNGS498	S		9.13	3.89	33.01	41.11	0.63	11.36				99.13
LNGS500	S		9.17	7.82	28.19	41.19	0.99	12.08				99.44
LNGS501	S		10.08	2.2	35.58	41.19	0.56	10.12				99.73
LNGS502	S		11.77	2.11	28.38	47.01	0.59	10.32				100.18
LNGS503	S		0.51	3.52	57.56	30.53	0.46	6.54				99.12
LNGS504	S		0.94	4.29	54.92	28.78	0.36	9.83				99.12
LNGS505	S		3.24	4.3	46.59	37.05	0.38	7.91				99.47
LNGS506	S		1.05	4.39	55.62	29.63	0.45	8.48				99.62
LNGS507	S		4.76	5.78	48.1	28.46	0.26	11.98				99.34
LNGS508	S		3.65	6.72	53.12	25.55	0.31	11.24				100.59
LNGS509	S		4.8	5.02	52.55	27.32	0.26	10.62				100.57
LNGS510	S		4.43	6.21	52.35	26.47	0.25	10.7				100.41
LNGS511	S		4.63	4.68	51.38	28.01	0.23	10.13				99.06
LNGS512	S		4.92	5.44	50.69	27.32	0.24	10.73				99.34
LNGS513	S		4.44	6.32	52.44	25.78	0.26	10.51				99.75
LNGS514	S		4.55	15.4	31.78	35.73	1.52	10.92				99.9
LNGS515	S		5.02	5.98	48.52	29.81	0.44	9.29				99.06
LNGS516	S		0.2	3.36	60.26	30.36	0.5	6.69				101.37
LNGS517	S		0.39	4.19	59.17	29.03	0.53	6				99.31
LNGS518	S		6.16	3.17	45.11	34.09	0.49	10.47				99.49
LNGS519	S		6.39	3.96	46.06	34.21	0.5	9.42				100.54
LNGS520	S		11.45	2.87	31.96	43.42	0.58	9.48				99.76
BD sh16	S		0.0097	64.3517	1.2495	15.14	0.0814	18.8596				99.6919
LenD1-58	S		4.3595	15.3557	42.0363	24.6242	0.1844	12.8839				99.444
LenD1-62	S		0.0365	69.1057	0.0285	2.3714	0.0115	28.0874				99.641
LenD5-117	S		0.0006	39.4183	28.5084	14.9646	0.1398	16.2339				99.2656
LenD5-118	S		0	39.5078	28.4095	14.8353	0.1318	16.2693				99.1537
LenD5-119	S		6.5249	3.8631	41.2457	35.652	0.5376	11.786				99.6093
LenD5-131	S		0.0117	36.4665	34.3981	13.9153	0.1688	16.1662				101.127
LenD5-135	S		0.0005	36.3989	31.95	15.9505	0.1751	15.0367				99.5117
LenD5-137	S		0.0181	28.0394	40.2096	17.3267	0.209	13.4219				99.2247
LenD5-140	S		0.078	38.7541	28.7528	14.604	0.1246	16.8573				99.1708
LenD5-141	S		0.0753	38.7844	30.1566	14.3783	0.1326	16.2867				99.8139
LenD5-142	S		0.0711	38.8924	29.3842	14.4799	0.1248	16.3392				99.2916
LenD5-147	S		0	37.3981	30.2559	15.8413	0.1408	15.841				99.4771
LenD5-148	S		0	33.7994	34.3751	16.5503	0.1599	14.4905				99.3752
LenD5-154	S		0.0184	33.2456	34.4404	16.5784	0.1733	14.8248				99.2809
Lng002	S		0.00714286	44.7245	25.2551	11.602	0.132653	17.3673	0.171429	0.0755102		99.3357
Lng003	S		0.0192893	27.5127	42.1015	16.6091	0.238579	12.9239	0.0649746	0.116751		99.5868
Lng004	S		0.0234694	37.8163	31.2755	14.0306	0.163265	15.449	0.132653	0.155102		99.0459
Lng005	S		0.0329897	18.3505	54.8247	15.6082	0.228866	10.1649	0.0391753	0.135052		99.3845
Lng006	S		0.176	11.44	57.36	20.55	0.307	9.03	0.039	0.229		99.131
Lng007	S		0.182	11.7	57.48	20.37	0.28	8.87	0.06	0.242		99.184
Lng008	S		0.683	8.23	58.14	21.84	0.255	9.92	0.097	0.382		99.547
Lng009	S		1.37056	14.5178	32.3756	36.7716	0.185787	13.4112	0.366497	0.290355		99.2893

## Sheet: LenAmphibole
		Table 1-4. Microprobe analyses from Leningrad pipe (wt.%)
		SiO2	TiO2	Al2O3	Cr2O3	FeO	MnO	MgO	CaO	Na2O	K2O		Total
					Amphiboles
Lam5-14	A	41.5465	2.2563	10.8739	0.1364	17.2182	0.1745	10.3938	11.4692	2.1873	1.2239		97.48
Lng21	A	42.71	1.04	13.41	0.514	8.53	0.094	15.33	11.25	2.41	1.71		96.998
Lam5-122	A	50.3152	0.0717	5.9074	0.1301	17.187	0.2758	20.3472	0.6101	0.2554	5.8997		101
Lng89	A	43.44	1.4	13.79	0.48	6.71	0.079	15.92	10.98	2.56	1.68		97.039
Lgam083	A	43.75	0.47	13.53	0.01	5.05	0.04	18.56	12.6	2.58	1.14		97.73
Lgam085	A	43.78	0.47	13.44	0.02	5.03	0.05	18.68	12.55	2.59	1.13		97.74
Lgam078	A	43.94	0.46	13.53	0.04	5.02	0.04	18.53	12.5	2.53	1.16		97.75
Lgam090	A	43.98	0.48	13.43	0.01	5	0.05	18.53	12.6	2.55	1.1		97.73
Lgam081	A	43.99	0.45	13.53	0.01	5.02	0.04	18.44	12.58	2.52	1.15		97.73
Lgam080	A	44.08	0.49	13.52	0.04	5.03	0.05	18.26	12.55	2.56	1.15		97.73
Lgam087	A	44.08	0.44	13.51	0.02	4.97	0.05	18.47	12.51	2.57	1.11		97.73
Lgam373	A	44.22	0.38	14.22	1.39	3.7	0.06	18.09	12.05	3.57	0.05		97.73
Lgam229	A	44.23	0.08	12.22	1.38	2.91	0.04	20.64	12.75	2.92	0.57		97.74
Lam5-18	A	44.4086	0.4643	12.0612	1.2663	3.8858	0.0485	18.9617	12.1345	3.0402	0.9827		97.2538
Lgam249	A	44.42	0.05	12.54	1.47	2.98	0.04	20.05	12.85	2.77	0.52		97.69
Lgam297	A	44.44	0.36	12.9	1.35	3.55	0.05	19.18	12.33	3.17	0.39		97.72
Lam5-57	A	44.5509	0.2976	13.2965	1.4887	2.5237	0.0369	19.1003	11.9028	3.7148	0.1678		97.08
Lam5-43	A	44.6207	0.2778	13.2817	1.4875	2.5698	0.0511	19.0409	11.9897	3.6904	0.1692		97.1788
Lam5-63	A	44.6858	0.2854	13.2103	1.5753	2.5908	0.0319	19.2342	11.8894	3.6869	0.158		97.348
Lgam305	A	44.88	0.03	13.04	1.31	3.13	0.05	19.46	12.66	2.83	0.37		97.76
Lgam372	A	44.89	0.21	13.21	1.27	2.69	0.05	19.64	12.52	3.13	0.13		97.74
Lgam144	A	44.93	0.48	11.7	0.02	7.1	0.04	18.12	11.75	2.81	0.78		97.73
Lgam252	A	45.01	0.07	12.53	1.5	2.98	0.04	19.59	12.83	2.66	0.51		97.72
Lam5-81	A	45.0464	0.3218	12.0118	1.3889	4.2737	0.0302	18.5112	11.7504	3.2387	0.7621		97.3352
Lam5-56	A	45.0751	0.3033	11.7209	1.7963	4.2233	0.0332	18.3954	11.8341	3.1487	0.7535		97.2838
Lgam209	A	45.28	0.29	11.49	1.69	2.44	0.03	20.43	12.76	2.7	0.61		97.72
Lam5-124	A	45.2966	0.051	12.8338	0.9425	2.4882	0.0027	26.2199	0.0042	2.3576	7.2355		97.432
Lgam366	A	45.38	0.31	11.99	1.31	1.97	0.05	20.69	11.91	3.41	0.2		97.22
Lgam192	A	45.39	0.06	11.63	1.8	3.01	0.05	19.84	12.32	3.02	0.63		97.75
Lgam197	A	45.42	0.64	12.44	1.34	2.5	0.04	19.39	12.84	2.48	0.62		97.71
Lgam370	A	45.47	0.3	12.52	1.15	1.83	0.02	20.82	11.7	3.23	0.18		97.22
Lgam156	A	45.57	0.02	11.96	1.53	2.95	0.04	19.7	12.45	2.8	0.73		97.75
Lgam196	A	45.57	0.3	11.46	1.73	2.5	0.04	20	12.85	2.63	0.62		97.7
Lgam186	A	45.6	0.32	11.47	1.65	2.47	0.05	20.09	12.68	2.75	0.64		97.72
Lgam153	A	45.69	0.01	12.85	1.29	2.62	0.04	19.34	12.74	2.41	0.74		97.73
Lgam208	A	45.69	0.28	11.67	1.8	2.47	0.04	19.84	12.64	2.69	0.61		97.73
Lgam138	A	45.7	0.34	11.63	1.15	3.26	0.03	19.42	11.77	2.94	0.81		97.05
Lgam255	A	45.7	0.07	11.89	1.52	2.83	0.05	19.68	12.9	2.54	0.5		97.68
Lgam207	A	45.71	0.29	11.52	1.8	2.42	0.05	20.02	12.64	2.67	0.61		97.73
Lgam168	A	45.72	0.05	11.98	1.44	2.83	0.04	19.68	12.76	2.54	0.69		97.73
Lgam263	A	45.73	0.22	11.82	1.68	2.5	0.04	19.89	12.76	2.59	0.48		97.71
Lgam274	A	45.75	0.07	12	1.56	2.86	0.05	19.72	12.69	2.6	0.44		97.74
Lgam128	A	45.81	0.4	12.15	0.36	2.77	0.04	20.11	12.78	2.47	0.84		97.73
Lgam089	A	45.84	0.07	12.32	1.44	2.44	0.03	19.41	12.69	2.4	1.1		97.74
Lgam185	A	45.84	0.32	11.46	1.74	2.45	0.05	19.88	12.69	2.65	0.64		97.72
Lgam206	A	45.88	0.3	11.48	1.77	2.43	0.04	19.95	12.63	2.63	0.61		97.72
Lgam205	A	45.89	0.1	11.13	1.72	2.46	0.05	20.39	12.76	2.6	0.61		97.71
Lgam262	A	45.89	0.02	11.93	1.66	2.41	0.04	20.02	12.7	2.59	0.48		97.74
Lgam184	A	45.9	0.04	12.04	1.6	2.4	0.05	19.75	12.88	2.45	0.64		97.75
Lgam204	A	45.9	0.29	11.5	1.82	2.47	0.04	19.82	12.62	2.66	0.61		97.73
Lgam261	A	45.9	0.02	12.33	1.25	2.4	0.05	19.88	12.92	2.5	0.48		97.73
Lgam203	A	45.92	0.3	11.51	1.77	2.43	0.04	19.94	12.62	2.6	0.61		97.74
Lgam219	A	45.93	0.26	11.53	1.67	2.43	0.03	19.98	12.58	2.7	0.6		97.71
Lgam218	A	45.94	0.29	11.55	1.77	2.47	0.05	19.84	12.61	2.62	0.6		97.74
Lgam202	A	45.95	0.02	11.56	1.56	3.06	0.04	19.67	12.59	2.69	0.61		97.75
Lgam178	A	45.96	0.02	11.5	1.56	2.3	0.03	20.38	12.93	2.36	0.65		97.69
Lgam182	A	45.96	0.29	11.56	1.64	2.46	0.04	19.99	12.61	2.56	0.64		97.75
Lgam183	A	45.96	0.1	11.81	1.48	2.37	0.03	19.95	13.01	2.35	0.64		97.7
Lgam260	A	45.96	0.08	11.86	1.54	2.86	0.03	19.57	12.72	2.63	0.48		97.73
Lgam228	A	45.98	0.03	11.7	1.51	2.99	0.04	19.59	12.73	2.59	0.57		97.73
Lgam177	A	46	0.08	11.84	1.45	2.4	0.04	19.84	13.04	2.36	0.65		97.7
Lgam227	A	46	0.08	11.9	1.69	2.39	0.04	19.89	12.5	2.68	0.57		97.74
Lam5-50	A	46.0292	0.3954	11.1943	0.6892	2.8696	0.0315	20.7514	12.8138	3.0075	0.6841		98.466
Lgam217	A	46.03	0.3	11.37	1.75	2.44	0.05	19.95	12.65	2.61	0.6		97.75
Lgam233	A	46.03	0.02	11.7	1.5	2.99	0.04	19.61	12.61	2.66	0.56		97.72
Lgam191	A	46.04	0.07	10.43	1.65	2.38	0.04	20.96	13	2.48	0.63		97.68
Lgam152	A	46.06	0.04	11.4	1.81	2.4	0.03	19.94	12.9	2.4	0.74		97.72
Lgam243	A	46.06	0.28	11.36	1.7	2.43	0.03	19.93	12.75	2.63	0.54		97.71
Lgam369	A	46.06	0.01	12.37	1.33	2.4	0.05	19.86	12.72	2.77	0.18		97.75
Lgam181	A	46.1	0.32	11.57	1.67	2.45	0.04	19.62	12.72	2.61	0.64		97.74
Lgam201	A	46.1	0.29	11.59	1.78	2.42	0.04	19.65	12.64	2.61	0.61		97.73
Lgam200	A	46.12	0.11	11.2	1.75	2.45	0.05	20.05	12.8	2.57	0.61		97.71
Lgam127	A	46.13	0.14	11.39	1.54	2.47	0.03	20.11	12.74	2.34	0.84		97.73
Lgam226	A	46.15	0.3	11.51	1.66	2.44	0.05	19.88	12.59	2.58	0.58		97.74
Lgam279	A	46.15	0.15	11.75	1.42	2.51	0.04	20	12.77	2.53	0.43		97.75
Lam5-20	A	46.1588	0.0498	11.6684	1.4778	2.4432	0.0371	19.7914	12.5306	2.8968	0.2212		97.2751
Lgam283	A	46.18	0.14	11.67	1.42	2.45	0.05	20.17	12.68	2.56	0.42		97.74
Lgam258	A	46.24	0.27	11.32	1.72	2.48	0.06	19.86	12.6	2.7	0.49		97.74
Lgam301	A	46.24	0.14	11.67	1.47	2.47	0.04	20.1	12.72	2.52	0.38		97.75
Lgam109	A	46.25	0.07	12.35	1.04	2.49	0.04	19.53	12.75	2.28	0.93		97.73
Lgam160	A	46.27	0.02	10.68	1.66	2.94	0.05	20.25	12.56	2.58	0.72		97.73
Lgam251	A	46.29	0.29	11.44	1.55	2.39	0.04	19.97	12.73	2.5	0.51		97.71
Lam5-87	A	46.2902	0.035	11.1277	1.7241	3.0727	0.0446	19.3343	12.1367	2.911	0.7149		97.3912
Lgam266	A	46.31	0	12.32	1.2	2.42	0.05	19.62	12.87	2.45	0.47		97.71
Lgam291	A	46.33	0.13	11.84	1.36	2.47	0.05	19.9	12.75	2.5	0.4		97.73
Lgam365	A	46.34	0.02	12.45	1.3	2.43	0.05	19.51	12.67	2.78	0.2		97.75
Lam5-99	A	46.3638	0.3581	10.4754	0.5907	2.9572	0.0338	20.294	12.1409	3.1724	0.638		97.0243
Lgam371	A	46.38	0.04	12.38	1.34	2.29	0.04	19.73	12.7	2.69	0.15		97.74
Lgam296	A	46.41	0.14	11.54	1.55	2.42	0.03	19.84	12.79	2.63	0.39		97.74
Lgam155	A	46.44	0.29	10.83	1.82	2.47	0.04	19.96	12.75	2.38	0.73		97.71
Lgam135	A	46.45	0.39	10.75	1.57	2.53	0.03	20.21	12.71	2.28	0.82		97.74
Lgam162	A	46.46	0.4	10.77	1.85	2.49	0.04	20.04	12.69	2.29	0.71		97.74
Lgam225	A	46.47	0.03	10.74	1.62	3.01	0.05	20.04	12.59	2.62	0.58		97.75
Lgam190	A	46.56	0.01	11.3	1.75	2.34	0.03	19.79	13	2.3	0.63		97.71
Lgam159	A	46.57	0.28	10.55	1.95	2.38	0.05	20.17	12.74	2.33	0.72		97.74
Lgam290	A	46.58	0.13	11.24	1.49	2.45	0.03	20.14	12.71	2.57	0.4		97.74
Lgam224	A	46.6	0.04	10.53	2	2.46	0.04	20.29	12.6	2.59	0.58		97.73
Lgam154	A	46.61	0.02	10.67	1.64	2.96	0.04	20.06	12.47	2.55	0.73		97.75
Lam5-84	A	46.6387	0.0022	11.3934	1.341	2.3224	0.0248	19.6095	12.587	2.4271	0.7563		97.1024
Lgam170	A	46.65	0.09	11.58	1.09	2.4	0.03	20.15	12.75	2.32	0.68		97.74
Lgam148	A	46.7	0.06	10.75	1.71	2.31	0.03	20.25	12.94	2.22	0.76		97.73
Lgam295	A	46.72	0.12	11.05	1.3	2.38	0.04	20.33	12.9	2.5	0.39		97.73
Lgam306	A	46.78	0.11	11.05	1.49	2.39	0.04	20.21	12.81	2.48	0.36		97.72
Lam5-77	A	46.9611	0.0116	11.8105	1.3312	2.3847	0.0295	19.1922	12.4089	2.48	0.8025		97.4122
Lam5-73	A	46.9822	0.3614	10.4493	0.8026	2.8662	0.037	19.7687	12.0091	3.1275	0.6388		97.0428
Lgam132	A	46.99	0.01	11.13	1.02	1.47	0	20.9	12.38	2.35	0.83		97.08
Lgam347	A	47.02	0.04	10.06	1.87	3.01	0.07	20.4	11.54	3.48	0.26		97.75
Lgam149	A	47.07	0.05	10.47	1.14	2.03	0	20.79	12.05	2.77	0.76		97.13
Lam5-149	A	47.1029	0.0135	11.9857	1.4057	2.4191	0.0383	18.5841	12.5165	2.3952	0.8105		97.2715
Lam5-54	A	47.136	0.0482	11.2483	1.4757	2.309	0.0459	19.4084	12.1983	2.8645	0.378		97.1123
Lgam248	A	47.24	0.08	10.53	1.59	2.2	0.04	20.43	12.78	2.34	0.53		97.76
Lgam167	A	47.27	0.35	10.04	0.75	2.16	0.01	21.16	11.88	3.12	0.69		97.43
Lgam166	A	47.4	0.04	11.09	1.48	3.03	0.04	18.81	12.71	2.42	0.69		97.71
Lgam267	A	47.47	0.03	10.65	0.99	1.61	0.03	20.77	12.31	2.69	0.47		97.02
Lgam215	A	47.54	0.29	10.08	0.15	2.8	0.04	21.04	12.46	2.72	0.6		97.72
Lgam286	A	47.54	0.03	11.71	1.25	1.86	0.03	19.58	12.32	2.64	0.41		97.37
Lam5-85	A	47.5453	0.1226	10.3577	1.7661	2.262	0.0438	19.6998	12.271	2.7807	0.4016		97.2506
Lam5-72	A	47.6321	0.029	10.5833	1.645	2.2673	0.0314	19.4615	12.3071	2.5683	0.4955		97.0205
Lgam216	A	47.82	0.12	10.85	1.09	1.48	0	20.55	12.21	2.54	0.6		97.26
Lgam221	A	47.82	0.03	10.05	1.28	1.69	0.03	20.94	12.37	2.26	0.59		97.06
Lgam171	A	47.97	0.35	10.67	0.6	2.28	0.02	19.74	11.92	3.05	0.68		97.28
Lgam367	A	48.39	0.3	12.08	1.22	1.95	0.04	18.35	11.77	3.02	0.2		97.32
Lgam330	A	48.57	0.07	7.7	1.78	3.01	0.05	21.53	11.12	3.6	0.3		97.73
Lgam362	A	48.57	0	7.81	1.69	3.11	0.05	21.54	11.02	3.71	0.23		97.73
Lgam124	A	48.94	0.07	11.66	1.09	1.56	0	18.84	12.26	1.9	0.86		97.18
Lgam133	A	49.27	0.33	11.01	0.95	2.78	0	17.71	11.71	2.55	0.83		97.14
Lam5-60	A	49.2752	0.0216	7.0219	1.741	2.9774	0.0525	21.131	10.8442	3.7895	0.2767		97.131
Lgam316	A	49.47	0.09	6.61	1.88	3.14	0.05	21.74	10.51	3.9	0.33		97.72
Lam5-11	A	49.5201	0.5319	2.3225	0	26.5527	0.407	8.1234	9.6082	0.8211	0.2955		98.1824
Lgam368	A	49.61	0.23	11.25	1.04	1.89	0.01	17.92	12.09	2.76	0.19		96.99
Lam5-109	A	49.6143	0.2178	7.8318	0.1368	6.3957	0.0873	19.1784	10.0421	3.3363	0.2358		97.0763
Lam5-88	A	49.7428	0.1905	7.6726	0.1117	6.567	0.0909	19.4792	9.815	3.3485	0.2236		97.2418
Lam5-102	A	49.7499	0.2236	7.8925	0.1408	6.7105	0.0739	20.2877	9.0826	3.0971	0.2136		97.4722
Lgam329	A	49.78	0.1	6.68	1.8	3.15	0.05	21.4	10.62	3.83	0.3		97.71
Lam5-108	A	49.8673	0.2027	7.9389	0.1116	6.497	0.0983	19.1322	9.6445	3.4109	0.2195		97.1229
Lgam324	A	50	0.11	6.71	1.84	3.14	0.06	21.25	10.44	3.89	0.31		97.75
Lgam232	A	50.05	0.56	4.96	0.31	9.3	0.1	18.66	8.21	5.01	0.56		97.72
Lam5-103	A	50.0532	0.2017	7.8028	0.1299	6.4532	0.0908	19.1732	9.8345	3.3151	0.2356		97.29
Lam5-144	A	50.0561	0.1775	7.7318	0.1141	6.4664	0.0981	19.1245	9.7706	3.2874	0.2253		97.0518
Lgam242	A	50.08	0.54	5.01	0.3	9.32	0.11	18.58	8.25	5	0.54		97.73
Lam5-101	A	50.0945	0.1818	7.4625	0.1625	6.5381	0.0876	19.3031	9.8206	3.3416	0.222		97.2143
Lgam339	A	50.11	0.1	6.66	1.82	3.12	0.07	21.23	10.51	3.85	0.27		97.74
Lam5-130	A	50.1376	0.1698	7.6195	0.2013	6.4807	0.1008	19.3652	9.7814	3.2593	0.2135		97.3291
Lgam355	A	50.33	0.19	7.36	0.08	6.3	0.07	19.84	9.77	2.91	0.24		97.09
Lam5-24	A	50.4839	0.1986	7.6895	0.1449	6.4869	0.1034	19.3385	9.8304	3.3298	0.2242		97.8301
Lgam357	A	50.52	0.03	6.26	1.37	2.15	0	22.21	10.75	3.78	0.24		97.31
Lgam120	A	50.73	0.01	10.51	0.84	1.52	0	18.4	12.27	2.05	0.87		97.2
Lgam346	A	50.75	0.09	5.94	1.68	3.18	0.06	21.73	10.08	3.95	0.26		97.72
Lgam354	A	51.01	0.12	5.54	1.55	2.81	0.05	21.99	10.61	3.78	0.24		97.7
Lgam363	A	51.02	0.13	5.57	1.53	2.77	0.06	22.13	10.58	3.72	0.22		97.73
Lam5-130	A	50.1376	0.1698	7.6195	0.2013	6.4807	0.1008	19.3652	9.7814	3.2593	0.2135		97.3291
Lgam300	A	51.06	0.2	5.44	1.56	2.56	0.04	21.96	11.03	3.52	0.38		97.75
Lam5-4	A	51.0685	0.5639	4.6676	0.2316	9.7549	0.105	17.6823	12.1357	1.023	0.038		97.2705
Lgam323	A	51.3	0.04	5.2	1.73	3.01	0.06	22.1	9.74	4.25	0.31		97.74
Lgam180	A	51.33	0.39	9.54	0.3	1.83	0.01	18.61	12.01	3.24	0.64		97.9
Lgam331	A	51.36	0.17	6.67	0.11	6.38	0.1	19.6	9.54	3.02	0.29		97.24
Lgam269	A	51.45	0.16	5.09	1.52	3.06	0.05	22.17	9.84	3.94	0.46		97.74
Lam5-129	A	51.4761	0.0009	0.6164	0.3093	1.2424	0.0549	18.1783	24.936	0.1676	0.0011		96.983
Lgam345	A	51.53	0.1	5.46	1.47	2.9	0.05	21.86	10.31	3.8	0.26		97.74
Lgam299	A	51.56	0.12	5.21	1.31	3.2	0.06	21.95	9.84	4.08	0.38		97.71
Lam5-44	A	51.643	0.0361	4.5503	1.5474	2.8321	0.0513	22.036	9.3698	4.8274	0.3199		97.2133
Lgam265	A	51.66	0.16	5.31	1.49	3.01	0.06	21.73	9.95	3.89	0.47		97.73
Lgam289	A	51.7	0.36	4.06	0.81	3.11	0.06	23.04	10.66	3.51	0.4		97.71
Lgam356	A	51.71	0.18	7.82	0.06	6.4	0.12	17.88	9.81	2.95	0.24		97.17
Lgam223	A	51.77	0.29	4.64	1.47	2.75	0.05	22.11	10.16	3.92	0.58		97.74
Lgam344	A	51.85	0.11	5.01	1.49	2.8	0.06	22.13	10.04	3.98	0.26		97.73
Lgam328	A	51.91	0.18	4.67	1.28	2.67	0.04	22.24	10.86	3.55	0.3		97.7
Lgam360	A	51.91	0.05	4.74	1.17	2.47	0.04	22.79	10.85	3.48	0.23		97.73
Lgam254	A	51.99	0.06	4.58	1.49	2.81	0.04	22.43	9.71	4.12	0.5		97.73
Lgam353	A	52.01	0.07	4.82	1.44	2.89	0.06	22.32	10.07	3.82	0.24		97.74
Lgam214	A	52.02	0.35	3.61	0.19	6.91	0.11	20.49	8.61	4.83	0.6		97.72
Lgam257	A	52.04	0.05	4.55	1.47	2.88	0.06	22.39	9.75	4.05	0.49		97.73
Lgam322	A	52.07	0.16	4.83	1.44	3.1	0.05	22.05	9.54	4.21	0.32		97.77
Lgam359	A	52.07	0.05	4.74	1.21	2.5	0.06	22.51	10.92	3.43	0.23		97.72
Lgam213	A	52.15	0.34	3.6	0.2	6.82	0.12	20.53	8.57	4.79	0.6		97.72
Lgam333	A	52.25	0.1	4.49	1.34	2.93	0.06	22.26	10.17	3.82	0.28		97.7
Lgam349	A	52.26	0.1	4.79	1.21	2.89	0.06	22.35	9.94	3.89	0.25		97.74
Lgam259	A	52.29	0.2	4.99	1.36	2.04	0.02	21.94	9.76	4.18	0.48		97.26
Lgam358	A	52.31	0.06	4.67	1.41	2.83	0.05	22.12	10	4.07	0.23		97.75
Lgam342	A	52.35	0.14	4.94	1.4	2.74	0.06	21.88	9.96	4	0.26		97.73
Lgam337	A	52.46	0.12	4.52	1.34	2.84	0.06	22.32	9.95	3.86	0.27		97.74
Lgam264	A	52.52	0.33	3.79	1.33	2.54	0.04	22.71	9.86	4.13	0.47		97.72
Lam5-69	A	52.5228	0.2322	3.6915	1.0057	3.3976	0.0782	22.1609	8.6336	5.1896	0.36		97.2721
Lgam341	A	52.55	0.03	4.63	1.55	2.92	0.06	22.04	9.31	4.37	0.26		97.72
Lgam336	A	52.56	0.07	4.45	1.17	2.68	0.06	22.52	10.04	3.91	0.27		97.73
Lam5-91	A	52.6645	0.3	1.726	0.2961	3.2029	0.0257	23.4942	8.7166	5.3484	1.6536		97.428
Lgam285	A	52.69	0.13	3.91	1.23	2.78	0.05	22.71	9.52	4.33	0.41		97.76
Lgam340	A	52.76	0.09	4.73	1.22	2.85	0.07	21.94	10.03	3.78	0.26		97.73
Lam5-97	A	52.7881	0.2495	1.9177	0.7976	2.5941	0.0461	24.0053	8.7276	5.6878	0.5553		97.3691
Lam5-98	A	52.8896	0.1153	3.5622	1.0364	2.5743	0.0562	22.6313	9.7503	4.2804	0.2111		97.1071
Lgam199	A	52.97	0.32	3.15	0.18	6.65	0.11	20.54	8.45	4.76	0.61		97.74
Lgam352	A	52.99	0.17	5.73	1.23	1.93	0.01	20.93	9.99	3.91	0.25		97.14
Lgam334	A	53.09	0.19	7.81	0.07	6.19	0.09	16.87	9.94	3.53	0.28		98.06
Lam5-58	A	53.0964	0.2346	3.5646	1.066	2.6097	0.0541	22.4689	9.7315	4.3397	0.4516		97.6171
Lgam119	A	53.11	0.5	3.06	0.75	3.44	0.06	22.28	9.93	3.72	0.88		97.73
Lam5-151	A	53.1198	0.1719	3.4394	0.9598	2.6495	0.062	23.159	9.5977	4.5625	0.1983		97.9199
Lgam364	A	53.17	0.02	3.86	1.22	2.92	0.06	22.78	8.95	4.55	0.21		97.74
Lgam220	A	53.2	0.3	2.89	0.25	5.78	0.12	21.41	8.56	4.64	0.59		97.74
Lgam212	A	53.21	0.32	2.91	0.24	5.88	0.11	21.41	8.52	4.55	0.6		97.75
Lam5-104	A	53.2775	0.3379	3.0204	0.9594	2.8607	0.0457	22.8275	9.8916	4.6383	0.4504		98.3094
Lgam281	A	53.43	0.19	3.32	1.28	2.89	0.05	22.67	8.47	4.99	0.42		97.71
Lgam298	A	53.5	0.14	3.41	0.93	2.6	0.06	22.92	10.12	3.67	0.38		97.73
Lgam280	A	53.56	0.17	3.27	1.34	2.86	0.05	22.63	8.42	5	0.42		97.72
Lgam327	A	53.57	0.19	3.36	1.28	2.86	0.07	22.66	8.52	4.92	0.3		97.73
Lgam338	A	53.61	0.05	3.88	1.14	2.15	0.03	22.41	9.34	4.14	0.27		97.02
Lam5-67	A	53.6144	0.0911	3.4506	0.9871	2.4214	0.0533	22.3784	10.0563	3.9366	0.2728		97.262
Lgam309	A	53.62	0.14	3.45	0.89	2.59	0.06	22.89	10.14	3.6	0.35		97.73
Lgam161	A	53.63	0.3	2.63	0.31	5.03	0.07	21.86	8.49	4.69	0.71		97.72
Lgam238	A	53.65	0.1	3.49	0.97	2.67	0.07	22.67	9.54	4.05	0.55		97.76
Lgam211	A	53.66	0.23	2.66	0.33	5.11	0.09	21.78	9	4.26	0.6		97.72
Lgam326	A	53.68	0.09	2.94	1.23	2.85	0.06	23.09	8.43	5.04	0.3		97.71
Lgam351	A	53.69	0.11	3.34	0.67	1.54	0	22.56	12.17	3.13	0.25		97.46
Lgam237	A	53.72	0.3	2.97	0.3	5.62	0.11	21.06	8.51	4.58	0.55		97.72
Lam5-92	A	53.7582	0.0473	3.1482	1.1316	2.5957	0.0515	22.3506	9.2327	4.5719	0.4024		97.2901
Lgam126	A	53.78	0.36	2.29	0.9	2.6	0.05	23.42	8.2	5.32	0.84		97.76
Lgam294	A	53.78	0.24	3.04	0.68	2.73	0.05	22.98	9.89	3.97	0.39		97.75
Lgam270	A	53.79	0.12	2.87	1.01	2.73	0.05	23.02	9.15	4.54	0.45		97.73
Lgam335	A	53.79	0.16	3.67	1.24	2.56	0.06	22.39	9.49	4.12	0.27		97.75
Lam5-128	A	53.8049	0.0352	26.7666	0.0587	1.3804	0.0477	1.1957	3.8059	1.5366	8.9306		97.5623
Lgam194	A	53.84	0.25	2.55	0.25	5.05	0.08	21.9	8.94	4.24	0.62		97.72
Lgam273	A	53.87	0.29	2.99	1	2.57	0.05	22.74	9.71	4.08	0.44		97.74
Lgam278	A	53.87	0.34	2.86	1.02	2.59	0.06	22.96	9.39	4.22	0.43		97.74
Lgam174	A	53.91	0.21	2.51	0.33	5.04	0.09	21.84	8.91	4.24	0.67		97.75
Lgam151	A	53.93	0.41	2.35	0.29	7.11	0.11	20.79	7.07	4.93	0.74		97.73
Lgam293	A	53.94	0.15	3.31	1.24	2.86	0.06	22.48	8.52	4.8	0.39		97.75
Lam5-34	A	53.9557	0.2334	2.4503	0.8196	2.7268	0.0481	22.5693	8.6943	5.0845	0.5908		97.1728
Lgam304	A	53.99	0.24	3.81	0.94	2.69	0.04	22.01	8.66	4.42	0.37		97.17
Lam5-74	A	54.0064	0.314	2.6242	1.0197	2.2266	0.0372	22.5551	9.5203	4.3371	0.4664		97.107
Lam5-75	A	54.0091	0.2137	1.0774	0.0959	3.5365	0.0436	23.9388	7.7166	6.1166	1.3977		98.1459
Lgam272	A	54.06	0.32	3.1	0.98	2.59	0.05	22.58	9.55	4.05	0.44		97.72
Lam5-46	A	54.0666	0.4228	2.5385	0.9392	2.7336	0.0433	22.1704	8.7956	4.7029	0.843		97.2559
Lam5-40	A	54.0954	0.2387	2.3141	0.6513	9.0208	0.0991	18.9137	11.6114	0.3681	0.1001		97.4127
Lgam277	A	54.16	0.04	1.74	1	2.81	0.07	24.04	8.02	5.33	0.43		97.64
Lam5-115	A	54.2418	0.181	2.2367	0.9252	2.6766	0.0391	22.7973	8.1814	5.8871	0.4179		97.5841
Lgam276	A	54.25	0.17	2.7	0.76	2.48	0.06	23.04	10.22	3.63	0.43		97.74
Lgam096	A	54.28	0.41	2.08	0.31	4.22	0.07	22.31	8.31	4.68	1.08		97.75
Lgam102	A	54.29	0.39	2.05	0.31	4.34	0.06	22.22	8.29	4.74	1.02		97.71
Lgam268	A	54.29	0.15	2.61	0.96	2.46	0.06	23.3	8.96	4.5	0.46		97.75
Lgam310	A	54.29	0.23	3.4	0.94	2.04	0.05	22.29	9.98	3.46	0.35		97.03
Lgam173	A	54.31	0.24	2.09	0.27	4.89	0.08	22.09	8.71	4.38	0.67		97.73
Lam5-90	A	54.3162	0.1472	2.5148	0.9642	2.5072	0.0599	22.6689	8.6718	5.4924	0.3891		97.7317
Lgam350	A	54.34	0.14	3.65	0.69	2.78	0.04	21.44	9.24	4.52	0.25		97.09
Lam5-61	A	54.3478	0.3524	2.4301	0.9586	2.4015	0.0455	23.4265	9.6866	4.5078	0.5134		98.6702
Lgam095	A	54.36	0.38	2.1	0.32	4.23	0.08	22.19	8.39	4.63	1.08		97.76
Lgam094	A	54.37	0.4	2.1	0.32	4.21	0.07	22.2	8.39	4.58	1.08		97.72
Lgam210	A	54.45	0.19	2.46	0.9	2.7	0.05	22.82	9.3	4.28	0.6		97.75
Lam5-31	A	54.4595	0.3945	2.3563	0.8261	2.6107	0.0546	22.5691	8.9055	4.9455	0.7568		97.8786
Lgam235	A	54.48	0.24	2.21	0.67	2.86	0.06	23.15	8.98	4.55	0.55		97.75
Lgam103	A	54.5	0.41	2.35	0.55	3.93	0.08	21.7	9.14	4.06	1		97.72
Lam5-78	A	54.5085	0.4411	2.035	0.8154	2.7055	0.0373	23.0012	8.7656	5.0322	0.8395		98.1813
Lam5-66	A	54.5097	0.1692	1.9128	0.7372	2.4294	0.0499	24.0302	8.8318	5.1551	0.709		98.5343
Lgam076	A	54.53	0.49	2.11	0.48	2.81	0.05	22.86	9.24	4.01	1.18		97.76
Lgam315	A	54.53	0.02	2.73	1	2.59	0.05	23.11	9.21	4.15	0.33		97.72
Lgam321	A	54.53	0.09	2.62	1.19	2.74	0.06	22.97	8.19	5.02	0.32		97.73
Lgam246	A	54.55	0.28	2.16	0.7	2.56	0.05	23.41	9.26	4.23	0.53		97.73
Lgam131	A	54.57	0.38	2.34	0.95	2.64	0.05	22.61	8.32	5.05	0.83		97.74
Lam5-105	A	54.5898	0.1818	2.3395	0.9864	2.6882	0.0429	22.0226	8.0441	5.7923	0.467		97.1546
Lgam163	A	54.59	0.26	2.15	0.27	4.84	0.09	21.92	8.66	4.26	0.7		97.74
Lgam361	A	54.6	0.15	5.02	1.18	2.19	0.03	19.75	10.03	3.94	0.23		97.12
Lgam105	A	54.61	0.35	2.05	0.16	4.3	0.07	22.19	9.1	3.96	0.96		97.75
Lgam253	A	54.61	0.12	1.85	0.58	1.93	0.04	24.56	9.13	3.89	0.5		97.21
Lgam275	A	54.61	0.17	2.53	0.71	2.82	0.07	23.14	8.95	4.31	0.43		97.74
Lam5-49	A	54.6111	0.1722	1.9882	0.9719	2.2938	0.0372	22.7147	8.5494	4.9914	0.8264		97.1563
Lgam158	A	54.66	0.35	1.88	0.57	2.15	0	23.74	8.84	4.46	0.72		97.37
Lgam074	A	54.69	0.49	2.09	0.48	2.82	0.07	22.68	9.27	3.98	1.19		97.76
Lgam137	A	54.71	0.21	2.21	0.85	2.66	0.05	22.86	8.89	4.5	0.81		97.75
Lgam284	A	54.71	0.19	2.6	0.71	2.83	0.06	22.9	8.97	4.37	0.41		97.75
Lgam118	A	54.73	0.39	2.37	0.97	2.64	0.06	22.47	8.19	5.04	0.88		97.74
Lam5-83	A	54.7348	0.3688	1.918	0.726	2.6097	0.0449	22.6614	8.6615	4.9293	0.7816		97.436
Lgam288	A	54.75	0.18	2.38	1.12	2.26	0.05	23.07	9.04	4.5	0.4		97.75
Lam5-68	A	54.7837	0.16	1.8182	1.1265	2.3657	0.0429	22.8249	7.1487	6.6391	0.7174		97.6271
Lgam230	A	54.79	0.25	2.21	0.85	2.56	0.06	22.96	8.92	4.56	0.56		97.72
Lam5-55	A	54.8054	0.1125	2.2557	0.8673	2.4668	0.0492	22.6732	9.1116	4.4668	0.5159		97.3244
Lgam142	A	54.82	0.2	1.99	0.79	2.56	0.05	23.09	8.81	4.6	0.79		97.7
Lgam125	A	54.86	0.2	1.97	0.79	2.54	0.05	23	8.82	4.62	0.84		97.69
Lgam150	A	54.86	0.33	2.09	0.45	1.84	0.03	23.73	8.82	4.18	0.74		97.07
Lgam189	A	54.86	0.34	2.21	0.73	2.66	0.06	22.82	9.48	3.95	0.63		97.74
Lgam055	A	54.87	0.19	1.45	0.09	4.16	0.03	22.24	8.23	4.82	1.69		97.77
Lgam068	A	54.89	0.26	1.21	0.33	3.76	0.07	23.09	7.69	5.09	1.33		97.72
Lgam099	A	54.94	0.2	1.58	0.07	3.24	0.04	22.94	7.86	5.83	1.05		97.75
Lgam188	A	54.98	0.31	1.92	0.8	2.57	0.06	23.07	8.3	5.1	0.63		97.74
Lgam236	A	54.98	0.08	1.67	0.32	2.35	0.04	23.82	8.39	4.88	0.55		97.08
Lam5-28	A	54.9835	0.1388	2.302	0.8887	2.4395	0.0587	23.4134	9.4178	4.597	0.5825		98.8219
Lgam048	A	55	0.26	1.15	0.3	3.75	0.05	22.8	7.12	5.44	1.86		97.73
Lgam176	A	55.02	0.3	1.88	0.84	2.56	0.05	23.07	8.35	5.01	0.65		97.73
Lgam141	A	55.03	0.31	1.95	0.62	2.71	0.05	22.95	9.22	4.1	0.79		97.73
Lgam145	A	55.03	0.3	1.54	0.41	1.55	0.02	24.59	8.57	4.35	0.77		97.13
Lgam348	A	55.07	0.11	2.54	1.07	2.68	0.07	22.88	8.48	4.59	0.25		97.74
Lam5-96	A	55.1088	0.1449	1.8891	0.8407	2.2343	0.0495	23.1051	8.6296	5.2238	0.6632		97.889
Lgam021	A	55.13	0.28	0.56	0.13	2.17	0.02	24.07	7.18	5.56	2.6		97.7
Lgam241	A	55.13	0.13	1.82	0.81	2.42	0.06	23.19	8.65	4.97	0.54		97.72
Lgam072	A	55.14	0.31	1.4	0.63	2.13	0.03	23.5	8.88	4.48	1.23		97.73
Lgam169	A	55.15	0.05	2.15	1.04	2.62	0.06	22.94	7.93	5.12	0.68		97.74
Lgam038	A	55.17	0.2	0.62	0.24	1.95	0.03	24.33	7.18	5.87	2.15		97.74
Lgam067	A	55.2	0.35	1.71	0.71	2.77	0.06	22.69	8.46	4.44	1.35		97.74
Lam5-94	A	55.231	0.173	1.9028	0.7776	2.4152	0.0459	22.7893	8.4383	5.1267	0.7454		97.6452
Lam5-139	A	55.2323	0.3256	0.7946	0.1473	2.2868	0.0236	23.1188	6.9496	6.374	1.9803		97.2329
Lgam046	A	55.24	0.25	1.35	0.56	1.77	0.01	23.52	8.23	4.92	1.9		97.75
Lgam122	A	55.25	0.23	1.32	0.37	5.53	0.08	21.71	7.15	5.23	0.86		97.73
Lgam325	A	55.26	0.09	2.53	1.04	2.73	0.07	22.65	8.1	5	0.3		97.77
Lgam234	A	55.27	0.22	1.91	0.83	2.37	0.05	23.25	8.7	4.59	0.55		97.74
Lgam198	A	55.28	0.2	1.98	0.67	2.19	0.03	23.24	9.94	3.6	0.61		97.74
Lgam101	A	55.29	0.3	1.98	0.78	2.1	0.04	22.82	8.64	4.75	1.03		97.73
Lgam292	A	55.29	0.05	1.93	1.04	2.42	0.05	23.36	8.6	4.61	0.39		97.74
Lam5-127	A	55.2959	0.2635	1.6169	0.5523	2.2532	0.0302	23.2231	8.5144	5.3646	0.6454		97.7595
Lgam287	A	55.33	0.04	1.87	0.79	2.57	0.07	23.32	8.78	4.51	0.4		97.68
Lam5-25	A	55.3393	0.4334	1.644	0.8064	2.434	0.0525	22.7852	8.4435	4.8773	1.0093		97.8249
Lgam110	A	55.36	0.23	1.58	0.26	2.72	0.05	23.3	10.03	3.29	0.92		97.74
Lgam303	A	55.36	0.04	3.13	0.67	1.65	0.01	22.78	9.25	4.16	0.37		97.42
Lgam130	A	55.37	0.22	2.03	0.82	2.47	0.04	22.77	8.71	4.49	0.83		97.75
Lgam108	A	55.38	0.26	1.36	0.37	5.57	0.09	21.66	7.11	5	0.93		97.73
Lgam034	A	55.39	0.21	0.8	0.1	2.76	0.03	23.39	7.16	5.69	2.2		97.73
Lgam245	A	55.39	0.21	1.74	0.4	2.79	0.05	23.14	9.36	4.12	0.53		97.73
Lgam106	A	55.4	0.36	2	0.89	2.42	0.05	22.63	8.75	4.3	0.95		97.75
Lgam115	A	55.41	0.42	1.8	0.54	1.8	0.01	23.56	8.45	4.2	0.9		97.09
Lgam193	A	55.42	0.09	1.72	0.83	1.69	0.02	24.06	6.55	6.25	0.62		97.25
Lgam086	A	55.43	0.2	1.18	0.49	2.16	0.04	23.88	9.09	4.17	1.11		97.75
Lgam146	A	55.44	0.16	1.47	0.73	2.4	0.07	23.5	8.1	5.12	0.76		97.75
Lam5-35	A	55.4521	0.0943	1.8455	1.1381	2.508	0.0407	22.767	6.6654	7.4283	0.4992		98.4386
Lgam113	A	55.46	0.24	1.4	0.56	2.44	0.04	23.52	8.44	4.75	0.9		97.75
Lgam187	A	55.46	0.22	1.96	0.7	2.15	0.03	23.12	9.87	3.6	0.63		97.74
Lgam088	A	55.47	0.15	1.39	0.78	2.43	0.03	23.37	7.74	5.3	1.1		97.76
Lgam143	A	55.48	0.21	1.58	0.63	2.62	0.07	23.22	8.74	4.4	0.78		97.73
Lam5-77	A	55.4852	0.2614	0.8748	0.0773	3.1633	0.0448	22.8146	6.9256	6.4281	2.0031		98.0782
Lam5-62	A	55.4879	0.2245	1.3439	0.6234	2.2352	0.0345	22.7742	7.8239	5.6687	1.0192		97.2354
Lam5-59	A	55.4915	0.2236	1.4692	0.7807	2.2014	0.0507	22.51	8.0145	5.1036	1.163		97.0082
Lam5-125	A	55.4922	0.2277	0.5101	0.0179	2.8466	0.0345	23.3173	6.7879	5.7752	2.7167		97.7261
Lgam172	A	55.5	0.08	1.97	1.04	2.65	0.05	22.85	7.76	5.2	0.67		97.77
Lgam179	A	55.5	0.16	1.62	0.72	1.65	0.01	24.29	7.13	5.58	0.64		97.3
Lgam244	A	55.5	0.09	2.03	0.94	2.66	0.08	22.86	7.95	5.1	0.53		97.74
Lgam056	A	55.51	0.31	1.07	0.45	2.78	0.04	23.16	7.5	5.23	1.66		97.71
Lgam092	A	55.57	0.19	1.33	0.58	1.67	0.01	24.32	8.18	4.19	1.09		97.13
Lgam256	A	55.59	0.25	2.45	0.62	1.64	0.03	22.18	9.67	4.11	0.49		97.03
Lam5-89	A	55.5973	0.2253	1.3546	0.6024	2.2327	0.0456	22.9616	7.8308	5.5936	0.9672		97.4111
Lgam107	A	55.6	0.33	1.49	0.63	2.07	0.04	23.44	9.18	4	0.94		97.72
Lgam062	A	55.61	0.32	0.86	0.5	2.52	0.05	23.53	6.85	6.04	1.46		97.74
Lgam222	A	55.63	0.1	1.55	1.01	2.43	0.04	23.43	7.52	5.47	0.58		97.76
Lam5-53	A	55.6394	0.2466	1.1008	0.1363	3.6781	0.0391	22.5445	7.2537	5.9335	1.6016		98.1736
Lam5-93	A	55.6429	0.17	1.8985	0.7515	2.4817	0.0369	22.8926	8.4478	5.1493	0.8779		98.3491
Lgam002	A	55.66	0.21	0.42	0.12	2.26	0.03	23.63	6.98	5.26	3.16		97.73
Lgam047	A	55.66	0.25	1.09	0.42	1.95	0.04	23.31	7.95	5.19	1.87		97.73
Lgam035	A	55.68	0.2	0.7	0.05	2.74	0.04	23.38	7.2	5.58	2.19		97.76
Lgam282	A	55.69	0.33	3.25	0.87	1.63	0	21.28	9.65	4.02	0.42		97.14
Lgam019	A	55.73	0.28	0.51	0.18	2.33	0.03	23.68	6.72	5.68	2.61		97.75
Lgam332	A	55.74	0.12	1.86	0.78	2.42	0.05	23.34	8.65	4.47	0.28		97.71
Lgam049	A	55.75	0.22	0.86	0.37	2.05	0.04	23.63	7.51	5.48	1.85		97.76
Lgam070	A	55.76	0.2	0.78	0.59	2.2	0.05	23.93	6.97	6	1.28		97.76
Lgam008	A	55.77	0.26	0.37	0	2.66	0.03	23.42	6.6	5.73	2.89		97.73
Lgam077	A	55.77	0.28	1.29	0.59	2.17	0.05	23.34	8.99	4.1	1.16		97.74
Lgam097	A	55.77	0.24	1.17	0.49	2.15	0.05	23.91	9.06	3.83	1.06		97.73
Lam5-71	A	55.7787	0.1845	1.3513	0.6868	2.2689	0.0518	22.9964	8.2883	5.1062	0.9093		97.6222
Lgam100	A	55.79	0.23	0.9	0.46	1.99	0.04	24.11	8.53	4.65	1.03		97.73
Lgam165	A	55.79	0.17	1.84	0.58	1.76	0.03	22.63	8.47	5.08	0.69		97.04
Lgam030	A	55.8	0.27	0.54	0.16	1.91	0.02	23.95	7.02	5.76	2.31		97.74
Lgam075	A	55.8	0.28	1.41	0.65	2.16	0.03	23.11	8.48	4.64	1.18		97.74
Lgam117	A	55.8	0.15	1.04	0.57	2.16	0.05	23.95	8.12	5.01	0.88		97.73
Lgam157	A	55.81	0.18	1.48	0.63	2.53	0.05	23.03	7.84	5.46	0.72		97.73
Lgam059	A	55.82	0.3	1.02	0.46	2.74	0.05	23.17	7.38	5.24	1.57		97.75
Lgam061	A	55.82	0.21	1.29	0.23	2.07	0.03	23.24	8.37	4.99	1.51		97.76
Lam5-23	A	55.8414	0.2473	0.5585	0.2654	2.5555	0.027	22.8844	6.862	6.2069	2.2507		97.6991
Lgam050	A	55.86	0.2	0.36	0.48	2.25	0.03	24.12	6.06	6.53	1.83		97.72
Lgam009	A	55.9	0.29	0.23	0.24	2.83	0.04	23.56	5.62	6.13	2.88		97.72
Lam5-26	A	55.9032	0.3975	1.5938	0.7955	2.3722	0.0483	22.1537	8.3719	4.6578	1.0013		97.2952
Lgam051	A	55.91	0.2	0.93	0.36	2.15	0.03	23.39	7.64	5.38	1.78		97.77
Lam5-133	A	55.93	0.2488	0.5764	0.0572	2.5922	0.038	23.0397	6.9407	6.1801	2.2719		97.875
Lgam073	A	55.93	0.18	1.06	0.57	2.4	0.04	23.43	7.98	4.95	1.2		97.74
Lgam043	A	55.94	0.21	0.78	0.01	2.31	0.02	23.2	7.02	5.58	2		97.07
Lgam063	A	55.94	0.25	1.11	0.61	2.04	0.04	23.39	7.61	5.3	1.45		97.74
Lam5-39	A	55.9482	0.1453	1.0571	0.5366	2.1624	0.0368	23.1532	7.9833	5.4916	0.7803		97.2948
Lgam006	A	55.96	0.24	0.36	0.12	2.39	0.04	23.57	6.47	5.71	2.91		97.77
Lgam140	A	55.97	0.37	2.41	0.7	1.98	0.03	21.69	8.81	4.32	0.8		97.08
Lgam014	A	55.99	0.2	0.45	0.03	2.52	0.04	23.45	6.85	5.49	2.73		97.75
Lgam027	A	55.99	0.19	0.46	0.08	2.17	0.02	23.78	6.97	5.75	2.35		97.76
Lgam054	A	56	0.27	0.91	0.39	2.11	0.03	23.34	7.42	5.55	1.71		97.73
Lgam025	A	56.02	0.25	0.62	0.1	1.74	0.02	23.14	6.99	5.76	2.42		97.06
Lgam123	A	56.02	0.16	1.7	0.71	1.7	0.04	22.67	8.63	4.64	0.86		97.13
Lgam004	A	56.03	0.26	0.48	0.06	2.3	0.02	23.35	6.98	5.22	3.07		97.77
Lgam033	A	56.03	0.19	0.66	0.23	2.84	0.03	23.09	6.6	5.84	2.24		97.75
Lgam057	A	56.03	0.33	1.18	0.55	2.45	0.03	22.71	7.48	5.4	1.61		97.77
Lgam091	A	56.04	0.17	1.16	0.52	2.52	0.06	23.05	8.09	5	1.09		97.7
Lgam116	A	56.04	0.18	1.71	0.46	1.43	0.03	23.58	8.41	4.48	0.89		97.21
Lam5-70	A	56.0631	0.2535	0.5708	0.13	2.4315	0.0299	23.1037	6.9702	5.9923	2.3932		97.9382
Lgam041	A	56.07	0.21	0.62	0.22	2.82	0.04	23.09	6.55	6.04	2.1		97.76
Lam5-30	A	56.0748	0.2047	0.8673	0.0381	3.1756	0.0342	22.7067	7.1996	6.2286	1.7915		98.3211
Lam5-114	A	56.085	0.2646	2.4968	0.9729	2.6503	0.0508	20.7782	8.7512	4.5103	0.572		97.1321
Lam5-134	A	56.085	0.2594	0.5884	0.0713	2.6222	0.0323	22.7263	6.9474	6.1453	2.2824		97.76
Lgam026	A	56.09	0.19	0.45	0.12	2.2	0.02	23.65	6.68	5.96	2.4		97.76
Lam5-52	A	56.0949	0.2449	0.6281	0.1219	2.4543	0.031	23.1521	7.0078	5.9877	2.3523		98.075
Lgam007	A	56.1	0.23	0.44	0.01	2.29	0.02	23.4	6.89	5.49	2.89		97.76
Lgam231	A	56.1	0.24	1.75	0.51	1.58	0	23.04	8.52	4.83	0.56		97.13
Lam5-51	A	56.1344	0.145	1.0674	0.5403	2.1945	0.0486	22.7787	8.1845	5.1301	0.8499		97.0734
Lgam084	A	56.14	0.22	0.91	0.51	2.25	0.04	23.57	7.24	5.71	1.13		97.72
Lam5-79	A	56.1416	0.2352	0.5588	0.1256	2.7646	0.0381	22.8094	6.8812	6.1006	2.2006		97.8557
Lgam134	A	56.17	0.23	1.13	0.59	2.47	0.04	23.2	7.33	5.77	0.82		97.75
Lgam022	A	56.18	0.21	0.33	0.26	1.83	0.02	23.96	6.52	5.87	2.57		97.75
Lgam164	A	56.18	0.28	2.44	0.75	2.33	0.01	21.5	8.64	4.53	0.7		97.36
Lam5-106	A	56.1979	0.1865	1.0721	0.4999	1.9994	0.0445	23.3737	8.6774	4.893	0.5331		97.4775
Lam5-26	A	56.1983	0.3547	1.5447	0.6863	2.0342	0.0271	22.6713	7.8498	4.8482	0.9191		97.1337
Lgam308	A	56.2	0.05	1.03	0.88	2.84	0.07	23.95	6.44	5.91	0.35		97.72
Lgam040	A	56.21	0.16	0.48	0.19	2.74	0.03	23.36	6.5	5.96	2.12		97.75
Lam5-29	A	56.2116	0.2169	1.3115	0.6765	2.206	0.0372	22.5822	7.9864	5.3652	0.9043		97.4978
Lgam111	A	56.24	0.12	1.01	0.43	1.56	0.01	24.28	7.79	4.84	0.9		97.18
Lam5-64	A	56.245	0.1655	0.3218	0.109	1.9505	0.0211	23.3005	6.4183	6.3599	2.5345		97.4261
Lgam029	A	56.26	0.25	0.64	0.01	1.57	0	22.78	6.9	6.28	2.32		97.01
Lgam136	A	56.26	0.13	1.35	0.46	2.02	0.05	23.43	9.38	3.85	0.81		97.74
Lgam037	A	56.28	0.17	0.63	0.02	2.78	0.03	23.03	7.1	5.54	2.18		97.76
Lgam240	A	56.28	0.1	1.68	0.96	2.09	0.01	24.61	6.6	5.56	0.54		98.43
Lgam031	A	56.29	0.16	0.61	0.13	2.1	0.03	23.35	7.35	5.45	2.29		97.76
Lgam114	A	56.3	0.22	1.36	0.48	1.75	0.03	22.95	7.93	5.19	0.9		97.11
Lgam064	A	56.34	0.23	0.99	0.47	2.36	0.05	23.15	7.41	5.38	1.4		97.78
Lgam247	A	56.34	0.34	2.28	0.61	1.7	0.03	22.17	9.19	4.18	0.53		97.37
Lgam012	A	56.36	0.16	0.45	0.1	2.08	0.02	23.55	6.97	5.24	2.81		97.74
Lam5-45	A	56.3617	0.1747	1.5765	0.7707	2.2527	0.0483	22.027	7.9743	5.0349	1.1716		97.3924
Lgam013	A	56.37	0.24	0.22	0.05	3.64	0.04	22.78	5.35	6.33	2.73		97.75
Lgam032	A	56.37	0.21	0.61	0.01	2.73	0.03	23	7.06	5.51	2.25		97.78
Lam5-95	A	56.3788	0.1748	0.5665	0.0983	2.4894	0.0267	23.4501	7.0067	6.173	2.1981		98.5624
Lgam024	A	56.39	0.17	0.23	0.24	2.06	0.03	24.09	6.18	5.89	2.45		97.73
Lgam320	A	56.39	0.05	0.95	0.8	2.91	0.07	23.9	6.5	5.81	0.32		97.7
Lgam001	A	56.4	0.31	0.35	0.15	1.99	0.02	23.35	6.57	5.35	3.29		97.78
Lgam302	A	56.4	0.04	1.05	0.94	2.82	0.08	23.81	6.39	5.86	0.37		97.76
Lgam312	A	56.41	0.06	0.98	0.82	2.85	0.07	23.88	6.45	5.85	0.34		97.71
Lgam239	A	56.42	0.05	1.11	1	2.76	0.05	23.2	6.39	6.23	0.54		97.75
Lgam307	A	56.42	0.06	1.15	0.96	2.82	0.08	23.68	6.47	5.74	0.35		97.73
Lam5-153	A	56.4564	0.1908	0.4572	0.1628	2.7799	0.0361	23.2163	6.7529	6.096	2.4883		98.6367
Lgam003	A	56.46	0.26	0.44	0.15	2.11	0.03	23.16	6.86	5.19	3.09		97.75
Lgam017	A	56.47	0.2	0.23	0.25	2.5	0.03	23.56	5.59	6.29	2.65		97.77
Lgam052	A	56.47	0.18	0.8	0.35	1.96	0.03	23.43	7.49	5.31	1.74		97.76
Lgam079	A	56.47	0.2	0.7	0.46	1.97	0.04	23.81	7.47	5.48	1.15		97.75
Lgam147	A	56.49	0.13	1.8	0.55	1.39	0	23.59	8.55	4.03	0.76		97.29
Lgam129	A	56.51	0.1	1.07	0.53	2.13	0.02	23.5	7.24	5.83	0.83		97.76
Lgam319	A	56.51	0.05	1	0.82	2.87	0.09	23.86	6.4	5.83	0.32		97.75
Lgam066	A	56.52	0.24	0.78	0.68	2.23	0.03	23.26	6.47	6.14	1.39		97.74
Lgam104	A	56.52	0.05	1.12	0.73	2.35	0.04	23.15	6.78	6.02	0.98		97.74
Lgam250	A	56.53	0.14	2.73	0.62	1.64	0	22.11	8.53	4.35	0.51		97.16
Lgam018	A	56.56	0.15	0.43	0.09	2.06	0.03	23.35	7	5.47	2.61		97.75
Lam5-82	A	56.562	0.1571	0.2292	0.2357	2.043	0.0114	23.5059	5.842	7.1937	1.8983		97.6783
Lgam010	A	56.57	0.23	0.22	0.27	2.42	0.02	23.46	5.7	6.05	2.83		97.77
Lgam011	A	56.57	0.25	0.54	0.02	2.27	0.03	23.09	7.27	4.9	2.82		97.76
Lgam020	A	56.58	0.21	0.44	0.19	1.87	0.02	23.36	6.73	5.77	2.6		97.77
Lgam318	A	56.58	0.06	0.99	0.79	2.84	0.09	23.89	6.38	5.81	0.32		97.75
Lam5-110	A	56.5852	0.1799	0.4257	0.3569	2.3504	0.0483	23.662	6.18	7.0574	1.4468		98.2926
Lgam314	A	56.6	0.03	0.99	0.84	2.89	0.08	23.73	6.44	5.75	0.33		97.68
Lam5-65	A	56.6091	0.2499	0.2795	0.1186	1.6505	0.0077	23.818	6.5249	6.0491	2.9071		98.2144
Lgam045	A	56.61	0.2	0.37	0.43	2.26	0.03	23.63	5.9	6.4	1.94		97.77
Lgam036	A	56.63	0.21	0.5	0.26	2.76	0.05	22.76	6.56	5.83	2.18		97.74
Lgam016	A	56.65	0.25	0.21	0.26	2.5	0.03	23.38	5.68	6.12	2.66		97.74
Lgam175	A	56.67	0.18	1.39	0.56	2.32	0.05	22.84	8.3	4.81	0.65		97.77
Lgam121	A	56.68	0.07	1.15	0.5	2.08	0.05	23.32	9.09	3.95	0.86		97.75
Lgam058	A	56.75	0.24	1.12	0.13	2.8	0.02	22.34	7.27	4.93	1.61		97.21
Lgam313	A	56.83	0.05	0.94	0.67	2.82	0.08	23.69	6.49	5.82	0.33		97.72
Lgam317	A	56.86	0.05	0.97	0.77	2.87	0.08	23.61	6.44	5.76	0.32		97.73
Lgam053	A	56.87	0.19	0.75	0.29	2.05	0.02	23.04	7.47	5.35	1.71		97.74
Lgam039	A	56.91	0.14	0.21	0.25	2.09	0.03	23.78	5.99	6.25	2.13		97.78
Lam5-80	A	56.9589	0.1594	0.2393	0.3867	2.0185	0.0209	23.399	5.779	7.115	1.9166		97.9933
Lgam028	A	56.98	0.23	0.51	0.02	1.74	0.01	23.45	6.82	5.09	2.33		97.18
Lgam065	A	57.02	0.2	0.95	0.1	2.81	0.02	22.31	7.2	5.31	1.4		97.32
Lgam311	A	57.05	0.07	1.04	0.91	2.8	0.08	23.32	6.41	5.7	0.34		97.72
Lgam082	A	57.07	0.26	1.37	0.42	1.44	0.05	22.4	7.68	5.52	1.14		97.35
Lgam015	A	57.11	0.22	0.35	0.08	1.42	0	23.94	6.37	6.05	2.72		98.26
Lgam343	A	57.3	0.08	2.99	0.71	1.79	0.03	20.24	9.97	3.72	0.26		97.09
Lgam112	A	57.39	0.17	1.1	0.42	1.63	0.03	22.53	8.29	4.55	0.9		97.01
Lgam195	A	57.51	0.14	2.15	0.64	1.9	0.04	21.59	9.04	3.55	0.62		97.18
Lgam098	A	57.53	0.22	1.25	0.5	1.53	0.02	21.95	7.74	5.27	1.06		97.07
Lgam071	A	57.58	0.22	1.43	0.68	1.78	0.01	21.34	8.09	4.83	1.26		97.22
Lgam005	A	57.69	0.2	0.3	0.12	1.22	0	23.53	6.39	5.12	3.02		97.59
Lgam023	A	57.77	0.28	0.59	0.13	2.03	0	21.24	6.83	5.68	2.48		97.03
Lam5-86	A	57.7735	0.142	3.1722	1.1633	2.638	0.0489	19.4448	8.599	3.8613	0.2559		97.0989
Lgam069	A	58.49	0.22	1.26	0.3	2.41	0.04	21.05	7.62	4.79	1.31		97.49
Lgam060	A	58.65	0.2	1.35	0.19	1.89	0	20.62	8.24	4.3	1.56		97
Lgam271	A	58.68	0.06	1.24	0.95	3.01	0.08	21.28	6.71	5.19	0.44		97.64
Lgam139	A	58.88	0.16	1.75	0.51	1.45	0.01	20.84	8.34	4.94	0.8		97.68
Lgam093	A	58.92	0.18	1.45	0.59	1.68	0.01	20.63	8.13	4.75	1.09		97.43
Lgam044	A	59.33	0.23	0.83	0.05	2.65	0	20.16	7.09	5.53	1.97		97.84
Lgam042	A	59.72	0.16	0.21	0.2	1.29	0.01	22.01	5.68	5.82	2		97.1

## Sheet: SvetlanaGar
		Table 2-1. Microprobe analyses of garnets and clinopyroxenes from Svetlana kimberlite pipe (wt.%)
Sample		SiO2	TiO2	Al2O3	Cr2O3	FeO	MnO	MgO	CaO	Na2O	K2O	Total
"Svetl471"		42.44	0.01	19.95	3.71	6.42	0.38	24.37	2.33	0		99.61
"Svetl472"		42.07	0.02	21.65	3.87	6.72	0.34	23.86	2.09	0		100.62
"Svetl472"		42.22	0.91	19.78	3.5	9.35	0.32	18.32	5.58	0		99.98
"Svetl473"		42.83	0.02	21.08	3.75	6.62	0.35	23.41	2.27	0		100.33
"Svetl474"		42.84	0.01	21.93	3.8	6.57	0.34	22.96	2.23	0		100.68
"Svetl475"		41.82	0.07	19.28	5.66	8.27	0.59	19.55	6.42	0		101.66
"Svetl476"		39.1	0.07	21.52	0.1	24.83	0.66	8.4	6.96	0.028		101.668
"Svetl477"		38.51	0.04	20.87	0.01	29.36	0.67	9.48	1.33	0.005		100.275
"Svetl478"		38.59	0.05	21.67	0.04	29.19	0.7	9.77	1.34	0.005		101.355
"Svetl479"		38.6	0.04	21.22	0.02	29.72	0.66	9.71	1.3	0.005		101.275
"Svetl480"		38.49	0.06	21.93	0.04	29.31	0.67	9.22	1.24	0.005		100.965
"Svetl481"		42.87	0.01	22.45	2.2	5.81	0.36	23.91	2.07	0		99.68
"Svetl482"		42.37	0.01	22.47	2.14	5.6	0.29	24.18	1.96	0		99.02
"Svetl483"		42.07	0.01	23.58	2.12	5.9	0.28	22.81	2.29	0		99.06
"Svetl484"		42.12	0.01	23.65	2.04	5.62	0.32	23.57	2.07	0		99.4
"Svetl485"		42.37	0.01	22.32	2	5.94	0.29	24.35	2.15	0		99.43
"Svetl486"		42.64	0.03	23.76	2	5.84	0.3	22.16	2.32	0		99.05
"Svetl487"		42.43	0.01	23.83	1.9	5.67	0.34	23.14	2.38	0		99.7
"Svetl488"		42.04	1.29	18.76	3.41	7.87	0.29	19.86	6.01	0		99.53
"Svetl489"		43.17	0.01	22.23	2.12	5.83	0.32	23.94	2	0		99.62
"Svetl490"		42.48	0	22.86	1.93	5.38	0.27	23.98	2.45	0		99.35
"Svetl491"		42.04	0.84	22.29	1.09	8.35	0.22	20.2	4.53	0		99.56
"Svetl492"		42.89	1.08	21.37	1.45	7.37	0.21	20.79	4.64	0		99.8
"Svetl493"		42.78	0.01	22.68	1.88	5.52	0.36	23.94	2	0		99.17
"Svetl494"		42.4	0.01	22.55	1.99	5.65	0.2	24.78	1.99	0		99.57
"Svetl495"		42.73	0	23.65	2.11	5.53	0.26	22.78	1.99	0		99.05
"Svetl496"		42.72	0	23.57	2.02	5.33	0.24	23.21	2	0		99.09
"Svetl497"		42.97	0.01	22.62	1.91	5.54	0.28	23.99	2.34	0		99.66
"Svetl498"		42.98	0.01	22.49	2.02	5.22	0.3	24.02	2.07	0		99.11
"Svetl499"		42.79	0.02	23.9	2.05	5.53	0.26	22.41	2.01	0		98.97
"Svetl500"		42.83	0.36	21.35	2.46	7.11	0.3	20.21	5.13	0		99.75
"Svetl501"		40.57	0.04	20.88	0.04	28.45	0.51	8.71	1.05	0.004		100.254
"Svetl502"		38.68	0.2	20.31	0	32.65	4.39	3.11	0.67	0.013		100.023
"Svetl503"		42.38	0.13	18.24	6.73	6.41	0.34	18.43	7.73	0		100.39
"Svetl504"		43	0.31	21.07	2.5	6.99	0.23	20.89	5.24	0		100.23
"Svetl505"		37.86	0.03	22.43	0	26.89	5.88	2.62	4.4	0.018		100.128
"Svetl506"		42.25	0.99	22.19	2.2	7.24	0.22	19.31	5.2	0		99.6
"Svetl507"		42.86	0.03	20.97	3.02	6.68	0.38	19.1	6.22	0		99.26
"Svetl508"		39.27	1	20.87	1.71	8.98	0.32	22.39	4.63	0		99.17
"Svetl509"		42.45	1	21.37	1.85	8.78	0.29	20.64	4.65	0		101.03
"Svetl510"		41.79	1.1	18.1	4.63	8.83	0.32	19.03	5.26	0		99.06
"Svetl511"		41.96	1.15	20.17	2.51	8.07	0.21	20.52	5.42	0		100.01
"Svetl512"		41.83	0.88	19.06	2.6	8.94	0.17	20.4	5.17	0		99.05
"Svetl513"		43.01	1.35	16.72	5.6	7.7	0.29	18.04	6.45	0		99.16
"Svetl514"		42.63	1.08	18.72	2.63	8.51	0.33	20.68	5.3	0		99.88
"Svetl515"		42.3	1.17	21.14	2.35	7.21	0.23	19.44	5.2	0		99.04
"Svetl516"		42.4	1.16	20.53	2.53	8.03	0.28	20.11	5.32	0		100.36
"Svetl517"		42.99	1.13	19.96	2.32	7.34	0.23	20.84	5.11	0		99.92
						Clinopyroxenes
"SvtD01 "		54.1	0	1.04	1.1	1.77	0.1	17.13	22.75	1.29	0.03	99.28
"SvtD02 "		53.93	0.32	2.59	3.16	2.33	0.11	15.67	17.98	3.33	0.02	99.42
"SvtD03 "		54.11	0	0.97	1.12	1.68	0.08	17.74	22.79	1.21	0.02	99.7
"SvtD04 "		54.08	0.31	2.59	3.11	2.32	0.07	15.8	18.07	3.49	0.02	99.84
"SvtD05 "		54.62	0	1.09	1.09	1.68	0.07	16.54	22.84	1.41	0.02	99.34
"SvtD06 "		53.74	0.37	1.81	1.34	3.26	0.13	18.7	17.85	2.08	0.05	99.28
"SvtD07 "		54.05	0.31	2.43	3.14	2.14	0.08	15.7	18.23	3.24	0.03	99.32
"SvtD08 "		54.62	0.3	2.68	3.1	2.2	0.07	15.17	18.08	3.24	0.02	99.46
"SvtD09 "		54.39	0.3	2.66	2.98	2.31	0.07	15.74	18.04	3.55	0.03	100.04
"SvtD10 "		53.69	0.05	2.91	1.79	1.84	0.05	17.48	20.57	1.32	0.01	99.7
"SvtD101 "		55.44	0.05	1.37	0.66	2.94	0.12	18.92	18.17	1.63	0.06	99.3
"SvtD102 "		54.18	0.07	1.03	1.16	2.46	0.1	17.19	21.7	1.59	0.03	99.48
"SvtD103 "		55.12	0.05	1.01	1.18	2.35	0.13	15.59	22.04	1.65	0.03	99.12
"SvtD104 "		55.09	0.3	2.79	1.31	2.11	0.08	15.76	18.94	2.72	0.03	99.1
"SvtD105 "		53.78	0.05	1.02	1.14	2.39	0.12	16.79	21.95	1.91	0.02	99.15
"SvtD106 "		54.11	0.06	0.91	1.07	2.47	0.1	17.52	22.06	1.27	0.02	99.57
"SvtD107 "		54.87	0.31	2.8	1.2	2.03	0.1	16.02	18.91	2.93	0.04	99.17
"SvtD108 "		53.79	0.18	0.85	0.76	2.98	0.05	16.95	22.32	1.21	0.02	99.09
"SvtD109 "		53.98	0.24	1.79	1.24	2.08	0.07	16.78	21.9	1.15	0.03	99.23
"SvtD11 "		54.69	0	0.99	1.07	1.64	0.1	18.35	22.87	1.22	0.01	100.93
"SvtD110 "		54.37	0.25	1.76	1.99	2.21	0.08	18.24	19.85	2.04	0.03	100.79
"SvtD111 "		53.66	0.27	1.56	1.87	2.35	0.02	17.64	19.6	2.24	0.04	99.21
"SvtD112 "		55.33	0.07	1.04	1.35	2.04	0.07	16.46	21.77	1.08	0.03	99.21
"SvtD113 "		54.05	0.16	0.94	0.93	2.8	0.06	16.84	22.12	1.34	0.02	99.24
"SvtD114 "		53.02	0.46	0.76	1.45	2.18	0.04	17.47	23.01	1.09	0.02	99.48
"SvtD115 "		54.5	0.41	1.84	0.76	3.61	0.08	18.32	17.73	1.87	0.05	99.12
"SvtD12 "		55.03	0	0.9	1.16	1.76	0.06	17.79	22.88	1.07	0.02	100.65
"SvtD13 "		55.1	0.32	2.6	3.2	2.27	0.08	14.71	18.07	3.31	0.02	99.66
"SvtD14 "		54.65	0.31	2.58	2.99	2.24	0.06	15.11	18.14	3.2	0.02	99.28
"SvtD15 "		54.21	0.28	2.59	3	2.32	0.09	15.76	18.31	2.89	0.03	99.45
"SvtD16 "		54.05	0.25	1.22	3.36	2.09	0.07	17.52	19.8	2.2	0.01	100.56
"SvtD17 "		55.5	0.16	0.66	1.27	2.87	0.1	15.58	22.34	1.23	0.03	99.71
"SvtD18 "		54.69	0	0.98	1.05	1.68	0.06	16.52	22.99	1.3	0.01	99.27
"SvtD19 "		55.35	0.36	1.94	0.69	3.86	0.11	17.53	18.51	2.16	0.04	100.51
"SvtD20 "		55.24	0.28	2.52	3.1	2.27	0.08	14.82	18.44	2.76	0.01	99.51
"SvtD21 "		55.25	0.33	2.67	2.37	2.46	0.08	14.63	18.63	3.27	0.06	99.69
"SvtD22 "		54.15	0	1.08	1.04	1.69	0.1	17.21	22.92	0.94	0.02	99.13
"SvtD23 "		54.41	0.17	1.14	1.12	2.33	0.08	17.78	22.07	1.48	0.02	100.58
"SvtD24 "		54.15	0.31	2.5	3.07	2.26	0.08	16.08	18.26	4.09	0.02	100.8
"SvtD25 "		55.29	0	1.04	0.96	1.66	0.11	16.31	22.96	1.12	0.02	99.45
"SvtD26 "		55.11	0.29	2.59	3.24	2.23	0.05	15.22	18.24	3.09	0.03	100.06
"SvtD27 "		54.34	0.17	0.69	1.45	2.88	0.06	16.94	22.17	1.56	0.03	100.26
"SvtD28 "		54.08	0.46	1.85	1.06	3.2	0.09	18.27	17.92	2.35	0.05	99.28
"SvtD29 "		55.63	0.41	1.84	1.8	3.22	0.1	16.52	17.5	2.03	0.05	99.05
"SvtD30 "		54.03	0.15	0.77	1.36	2.85	0.1	16.27	22.34	1.51	0.04	99.38
"SvtD31 "		54.23	0	1.02	1.08	1.63	0.08	17.81	22.83	1.36	0.09	100.04
"SvtD32 "		54.8	0.31	2.65	2.32	2.34	0.1	15.31	18.59	2.78	0.02	99.2
"SvtD33 "		54.43	0.29	2.57	3.06	2.04	0.05	15.22	18.51	3.41	0.03	99.58
"SvtD34 "		54.39	0.31	2.65	3.01	2.26	0.09	15.27	18.28	3.65	0.03	99.91
"SvtD35 "		54.09	0	0.94	0.99	1.63	0.04	18.24	22.91	1.36	0.03	100.2
"SvtD36 "		54.52	0.3	2.49	3	2.2	0.07	15.47	18.18	3.13	0.02	99.36
"SvtD37 "		54.01	0.3	2.72	2.97	2.26	0.07	15.32	18.11	3.61	0.03	99.37
"SvtD38 "		54.84	0.3	2.55	2.86	2.18	0.08	15	17.97	3.34	0.06	99.12
"SvtD39 "		54.99	0	0.94	1.07	1.64	0.09	16.97	22.84	1.02	0.02	99.56
"SvtD40 "		54.66	0.29	2.64	2.36	2.3	0.09	15.64	18.19	3.24	0.03	99.41
"SvtD41 "		53.92	0.13	0.76	1	2.87	0.07	16.87	22.2	1.65	0.02	99.47
"SvtD42 "		54.41	0.32	2.5	2.37	2.24	0.07	16.09	18.05	3.35	0.02	99.4
"SvtD43 "		55.38	0	1.03	0.77	1.62	0.07	17.02	22.68	0.9	0.02	99.47
"SvtD44 "		54.19	0.32	2.7	2.33	2.21	0.1	15.97	18	3.56	0.03	99.38
"SvtD45 "		54.57	0	1.02	0.81	1.71	0.08	17.67	22.6	1.22	0.01	99.68
"SvtD46 "		54.61	0.3	2.72	2.39	2.3	0.07	15.22	17.82	3.89	0.07	99.32
"SvtD47 "		55.07	0	1	0.78	1.62	0.09	17.5	22.47	1.09	0.01	99.62
"SvtD48 "		55.9	0.14	0.68	0.98	2.85	0.09	15.39	22.04	1.35	0.03	99.42
"SvtD49 "		53.5	0.3	2.83	3.04	2.26	0.03	16.17	17.93	3.06	0.02	99.12
"SvtD50 "		54.21	0	0.96	0.96	1.68	0.04	18.1	22.47	0.79	0.01	99.21
"SvtD51 "		53.8	0.3	2.53	2.99	2.25	0.04	17.38	17.91	3.01	0.03	100.21
"SvtD52 "		53.99	0.28	2.82	2.9	2.12	0.03	15.67	18	3.43	0.03	99.24
"SvtD53 "		54.39	0.29	2.79	3.06	2.1	0.05	16.1	18.07	3.33	0.03	100.18
"SvtD54 "		53.64	0.29	2.33	3.09	2.05	0.06	16.52	18.21	3.54	0.02	99.73
"SvtD55 "		54.63	0.09	0.98	1.14	2.18	0.04	17.04	22.45	1.13	0.02	99.68
"SvtD56 "		53.89	0.02	1.04	0.98	1.64	0.05	18.77	22.81	1.1	0.02	100.3
"SvtD57 "		54.95	0.55	0.66	1.18	2.67	0.08	15.68	22.25	1.2	0.01	99.22
"SvtD58 "		54.98	0.27	1.4	2.32	2.33	0.07	15.54	20.18	2.34	0.03	99.43
"SvtD59 "		55.04	0.08	1.03	1.3	1.95	0.1	16.74	22.04	1.51	0.02	99.79
"SvtD60 "		55	0.15	0.71	0.78	3.35	0.08	16.82	22.25	1.52	0.03	100.66
"SvtD61 "		53.08	0.03	3.24	1.38	1.44	0.04	15.45	23.01	1.36	0.01	99.03
"SvtD62 "		54.84	0.39	2.12	0.95	3.02	0.12	18.17	17.72	1.99	0.04	99.32
"SvtD63 "		55.55	0.14	1.01	0.99	3.43	0.07	14.65	22.25	1.56	0.03	99.65
"SvtD64 "		53.12	0.05	3.02	1.25	1.31	0.07	16.45	23.05	1.19	0.01	99.51
"SvtD65 "		54.1	0.02	2.84	1.18	1.73	0.06	17.81	20.61	0.93	0.02	99.28
"SvtD66 "		54.6	0.19	0.66	0.85	3.1	0.07	16.57	22.49	1.48	0.03	100.01
"SvtD67 "		53.21	0.03	3.54	1.57	1.44	0.07	15.57	22.78	1.27	0.02	99.48
"SvtD68 "		54.22	0.02	3.16	1.21	1.32	0.1	15.11	23.07	1.45	0.03	99.66
"SvtD69 "		55.28	0.07	1.08	1.27	2.01	0.1	16.56	22.2	1.72	0.03	100.29
"SvtD70 "		53.2	0.03	3.23	1.22	1.36	0.1	16.55	23.06	1.18	0.02	99.93
"SvtD71 "		54.13	0.13	3.29	1.64	1.43	0.09	16.3	20.48	1.83	0.01	99.32
"SvtD72 "		53.94	0.04	2.55	1.15	1.17	0.06	16.27	23.1	1.06	0.01	99.34
"SvtD73 "		53.45	0.03	3.05	1.27	1.29	0.08	16.1	23.2	1.73	0.13	100.2
"SvtD74 "		54.6	0.25	0.79	2.49	1.91	0.04	15.73	21.96	1.94	0.03	99.71
"SvtD75 "		53.31	0.03	2.79	1.28	1.77	0.06	18.53	20.53	0.81	0.01	99.11
"SvtD76 "		53.8	0.02	2.89	1.15	1.47	0.1	17.24	22.45	1.11	0.01	100.23
"SvtD77 "		52.93	0.04	3.12	1.25	1.2	0.09	16	23.4	1.03	0.02	99.06
"SvtD78 "		54.34	0.08	1.78	1.35	2.26	0.09	17.31	21.59	1.84	0.02	100.64
"SvtD79 "		53.91	0	2.81	1.13	1.18	0.08	16.61	23.91	0.9	0.02	100.53
"SvtD80 "		52.95	0.21	1.31	0.1	11.38	0.27	10.8	22.03	0.48	0.01	99.53
"SvtD81 "		53.97	0.44	1.69	1.56	3.07	0.06	19.19	17.26	2.19	0.04	99.43
"SvtD82 "		54.11	0.05	1.74	1.57	1.97	0.06	17.08	21.29	1.61	0.02	99.48
"SvtD83 "		52.32	0.01	2.76	1.37	1.46	0.05	17.59	22.76	1.38	0.02	99.7
"SvtD84 "		53.36	0	1.73	0.77	1.14	0.03	18.44	23.79	0.81	0.01	100.07
"SvtD85 "		54.63	0.18	0.82	0.95	2.27	0.07	17.47	23.03	0.87	0.04	100.29
"SvtD86 "		54.31	0.18	1.46	1.08	2.22	0.07	16.76	22.62	1.31	0.02	100.01
"SvtD87 "		54.45	0.17	1.82	2.97	2.12	0.06	16.4	18.46	2.86	0.04	99.31
"SvtD88 "		54.92	0.35	2.03	0.58	2.88	0.06	18.6	18.17	1.78	0.04	99.37
"SvtD89 "		54.99	0.07	0.93	1.29	2.24	0.08	16.66	22	1.21	0.03	99.47
"SvtD90 "		54.51	0.05	0.99	1.42	2.15	0.09	17.03	22.06	1.54	0.03	99.84
"SvtD91 "		55.84	0.27	2.45	1.37	1.95	0.07	15.99	19.15	2.59	0.06	99.68
"SvtD92 "		55.82	0.06	1.02	1.27	2.05	0.07	15.6	21.92	1.55	0.04	99.36
"SvtD93 "		54.67	0.17	0.81	1.08	2.13	0.09	15.9	22.77	1.54	0.04	99.16
"SvtD94 "		54.82	0.06	0.99	1.3	2.19	0.08	16.73	22.08	1.37	0.07	99.62
"SvtD95 "		54.98	0.15	0.75	1.13	2.11	0.06	17.33	22.68	1.31	0.02	100.5
"SvtD96 "		54.77	0.06	1.04	1.22	2.01	0.07	17.07	22.04	1.44	0.03	99.72
"SvtD97 "		54.73	0.07	0.91	1.12	2.08	0.08	16.87	22.04	1.31	0.03	99.21
"SvtD98 "		55.32	0.17	0.85	1.1	2.09	0.03	15.61	22.26	1.91	0.05	99.34
"SvtD99 "		54.71	0.06	1.07	1.15	2.05	0.09	17.12	21.91	1.15	0.03	99.31
"SvtDSvtD"		54.87	0.17	0.67	1.26	2.02	0.07	16.63	22.57	1.58	0.02	99.84

## Sheet: SvetlanaIlmSp 
	Table 2-2. Microprobe analyses of chromites and ilmenites from Svetlana kimberlite pipe (wt.%)
Sample	SiO2	TiO2	Al2O3	Cr2O3	FeO	MnO	MgO	CaO	Na2O	K2O	Total
					Chromites
"Svetl550"		0	31.99	36.53	16.35	0.27	14.6				99.74
"Svetl551"		2.11	7.06	57.07	20.48	0.38	12.25				99.35
"Svetl552"		0	36.02	34	15.84	0.24	14.39				100.49
"Svetl553"		3.23	3.26	55.2	27.74	0.44	9.36				99.23
"Svetl554"		0.6	6.41	58.03	23.6	0.38	10.1				99.12
"Svetl555"		3.29	3.29	55.33	27.85	0.43	8.96				99.15
"Svetl556"		3.24	5.69	53.98	27.21	0.45	8.99				99.56
"Svetl557"		2.37	14.37	49.02	19.86	0.33	13.54				99.49
"Svetl558"		0.09	28.98	40.36	15.84	0.26	14.24				99.77
"Svetl559"		2.39	14.27	48.79	19.83	0.32	13.54				99.14
"Svetl560"		1.66	10.52	52.09	23.82	0.35	10.77				99.21
"Svetl561"		4.12	4.83	49.51	31.03	0.4	9.28				99.17
"Svetl562"		0.48	10.14	59.48	17.3	0.37	13.16				100.93
"Svetl563"		0	32.15	38.65	16	0.25	13.59				100.64
"Svetl564"		0	33.96	35.17	15.5	0.28	14.35				99.26
"Svetl565"		0.12	10.64	59.62	16.89	0.35	11.95				99.57
"Svetl566"		2.98	8.43	54.06	21.76	0.36	11.46				99.05
"Svetl567"		3.69	4.9	52.1	28.95	0.39	9.27				99.3
"Svetl568"		1.7	8.87	56.27	20.19	0.36	11.87				99.26
"Svetl569"		2.32	15.37	48.72	19.38	0.29	13.57				99.65
"Svetl570"		2.56	11.42	55.57	18.22	0.32	12.3				100.39
"Svetl571"		3.12	5.53	56	23.62	0.33	10.81				99.41
"Svetl572"		2.56	10.62	55.65	18.51	0.33	12.21				99.88
"Svetl573"		0	34.57	34.55	14.96	0.28	14.72				99.08
"Svetl574"		0	32.73	36.12	15.44	0.25	14.63				99.17
"Svetl575"		0	32.41	36.7	15.71	0.22	14.85				99.89
"Svetl576"		0.2	10.15	59.7	16.75	0.34	12.46				99.6
"Svetl577"		0.53	5.73	60.51	22.63	0.38	10.08				99.86
"Svetl578"		0	37.01	33.15	15.39	0.25	14.37				100.17
"Svetl579"		3.09	8.58	54.23	21.66	0.34	11.44				99.34
"Svetl580"		0	35.28	35.2	14.95	0.24	14.2				99.87
"Svetl581"		3.28	3.08	56	26.86	0.42	9.38				99.02
"Svetl582"		0.51	4.83	60.93	22.72	0.33	10.21				99.53
"Svetl583"		0	28.79	39.25	18.35	0.27	13.31				99.97
"Svetl584"		0	14.82	56.77	16.73	0.32	12.15				100.79
"Svetl585"		3.06	5.65	57.85	23.19	0.35	10.71				100.81
"Svetl586"		4.65	11.57	49.03	22.06	0.38	12.94				100.63
"Svetl587"		0	35.12	34.68	15.38	0.25	14.57				100
"Svetl588"		0	33.84	35.11	15.87	0.26	14.92				100
"Svetl589"		0	33.48	36.43	15.61	0.24	15.22				100.98
"Svetl590"		0	34.46	35.71	15.19	0.25	14.42				100.03
"Svetl591"		0	36.47	34.14	15.24	0.24	14.6				100.69
"Svetl592"		2.39	15.76	49.55	19.28	0.31	13.51				100.8
"Svetl593"		0.06	34.38	36.67	12.98	0.26	15.28				99.63
"Svetl594"		0	34.39	36.34	15.34	0.24	14.43				100.74
"Svetl595"		0	33.67	36.78	15.05	0.26	15.17				100.93
"Svetl596"		0.08	12.07	57.33	17.41	0.34	11.87				99.1
"Svetl597"		0	32.66	37.51	15.73	0.23	14.46				100.59
"Svetl598"		0.06	14.84	56.04	16.57	0.31	11.78				99.6
"Svetl599"		3.18	5.87	56.47	22.83	0.38	11.15				99.88
"Svetl600"		0	37.44	34.08	14.84	0.26	13.91				100.53
"Svetl601"		5.65	11.5	43.61	25.42	0.4	13.52				100.1
"Svetl602"		0	36.13	34.23	14.97	0.24	14.78				100.35
"Svetl603"		0.33	6.66	62.84	18.45	0.33	11.27				99.88
"Svetl604"		0.13	12.41	57.36	18	0.35	11.7				99.95
"Svetl605"		0	35.89	34.97	14.64	0.22	14.39				100.11
"Svetl606"		0	32.64	36.8	14.9	0.26	14.62				99.22
"Svetl607"		3.37	3.88	53.73	28.45	0.42	9.23				99.08
"Svetl608"		0.17	9.73	60.32	16.43	0.36	12.02				99.03
"Svetl609"		0.24	8.44	61.04	18.14	0.36	11.76				99.98
"Svetl610"		0.61	10.42	56.64	18.88	0.35	12.98				99.88
"Svetl611"		0.06	26.94	43.63	16.36	0.33	11.94				99.26
"Svetl612"		3.11	6.9	49.75	31.21	0.45	8				99.42
"Svetl613"		0.28	14.63	54.83	17.33	0.37	11.81				99.25
"Svetl614"		0.55	9.36	58.2	19.6	0.35	11.12				99.18
"Svetl615"		0.37	17.23	48.1	21.82	0.32	11.62				99.46
"Svetl616"		0.83	16.25	49.78	22	0.32	10.6				99.78
"Svetl617"		1.37	6.39	57.72	23.62	0.42	9.97				99.49
"Svetl618"		0	28.41	42.22	16.32	0.29	12.25				99.49
"Svetl619"		0	26.29	44.74	16.34	0.3	11.58				99.25
"Svetl620"		1.84	3.82	61.6	22.23	0.47	9.82				99.78
"Svetl621"		1.8	4.06	60.33	23.56	0.48	9.88				100.11
"Svetl622"		0.64	10.84	56.77	19.3	0.35	12.76				100.66
"Svetl623"		3.86	4.75	49.36	32.9	0.42	8.62				99.91
"Svetl624"		0.09	13.13	56.03	18.56	0.33	12.13				100.27
"Svetl625"		0.21	17.06	53.24	18.11	0.33	11.53				100.48
"Svetl626"		0.61	5.82	61.15	22.02	0.4	10.2				100.2
"Svetl627"		0.63	7.11	60.87	20.7	0.42	10.54				100.27
"Svetl628"		2.6	5.53	52.92	30.71	0.46	8.34				100.56
"Svetl629"		0.74	10.74	56.29	19.19	0.33	12.73				100.02
"Svetl630"		0.77	10.53	56.76	19.21	0.35	12.67				100.29
"Svetl631"		1.57	12.94	53.62	20.3	0.35	11.8				100.58
"Svetl632"		0.01	23.21	47.23	14.64	0.3	15.51				100.9
"Svetl633"		1.86	4.66	58.19	25.43	0.41	9.51				100.06
"Svetl634"		0.83	11.24	56.03	19.11	0.34	12.57				100.12
"Svetl635"		2.95	5.4	57.44	22.8	0.42	11.2				100.21
"Svetl636"		2.56	6.19	48.14	34.6	0.42	7.92				99.83
"Svetl637"		0	33.27	38.06	15.64	0.29	12.96				100.22
"Svetl638"		1.59	9.2	57.45	19.3	0.37	12.13				100.04
"Svetl639"		0.99	10.24	55.76	23.85	0.38	8.91				100.13
"Svetl640"		0.25	10.42	61.28	15.81	0.33	12.22				100.31
"Svetl641"		1.17	10.97	56.07	19.21	0.34	12.76				100.52
"Svetl642"		0.75	11.12	56.1	18.77	0.29	12.77				99.8
"Svetl643"		2.22	7.48	59.03	18.51	0.34	12.13				99.71
"Svetl644"		0.45	8.35	59.66	18.71	0.32	12.67				100.16
"Svetl645"		2.96	14.61	46.78	20.71	0.3	13.81				99.17
"Svetl646"		0.25	15	54.16	18.48	0.36	11.93				100.18
"Svetl647"		0.27	10.73	57.2	21.29	0.39	10.77				100.65
"Svetl648"		4.32	4.13	49.17	32.72	0.4	8.85				99.59
"Svetl649"		0	44.72	23.52	15.01	0.2	15.7				99.15
"Svetl650"		0.04	12.34	56.84	17.75	0.34	12.31				99.62
"Svetl651"		2.43	8.14	53.53	24.51	0.41	11.02				100.04
"Svetl652"		1.61	8.23	58.07	19.53	0.38	12.13				99.95
"Svetl653"		0.57	9.17	57.97	20.85	0.41	10.74				99.71
"Svetl654"		2.38	7.02	58.22	20.41	0.38	12.06				100.47
"Svetl655"		0.16	10.5	61.34	16.46	0.35	12				100.81
"Svetl656"		0	33.99	37.54	15.92	0.26	12.77				100.48
"Svetl657"		0.31	14.37	53.65	18.98	0.36	12.09				99.76
"Svetl658"		0.43	13.69	55.49	17.38	0.34	11.95				99.28
"Svetl659"		1.25	10.22	55.89	19.63	0.34	12.5				99.83
"Svetl660"		0.13	10.84	52.94	24.14	0.42	11.19				99.66
"Svetl661"		0.6	9.67	57.07	21.83	0.41	10.41				99.99
"Svetl662"		2.38	2.62	59.11	25.17	0.43	9.4				99.11
"Svetl663"		1.12	11.38	53.86	19.74	0.35	12.91				99.36
"Svetl664"		6.23	7.08	44.55	27.86	0.38	13				99.1
"Svetl665"		0	13.61	55.95	17.28	0.35	11.98				99.17
"Svetl666"		0.78	8.57	58.96	17.81	0.34	12.66				99.12
"Svetl667"		1.48	6.29	54.11	27.92	0.39	8.93				99.12
"Svetl668"		0	44.57	22.94	14.5	0.18	17.14				99.33
"Svetl669"		3.7	13.75	41.97	29.47	0.34	10.08				99.31
"Svetl670"		5.31	3.11	43.47	40.82	0.4	7.05				100.16
"Svetl671"		0.6	10.19	56.2	21.4	0.4	10.94				99.73
"Svetl672"		3.99	6.19	48.18	31.36	0.39	9.38				99.49
"Svetl673"		0.67	11.24	56.44	19.33	0.3	12.6				100.58
"Svetl674"		4.22	4.89	46.31	35.07	0.39	8.15				99.03
"Svetl675"		1.32	8.46	57.59	21.84	0.39	10.64				100.24
"Svetl676"		3.43	5.29	53.01	29.27	0.41	9.53				100.94
"Svetl677"		0.69	9.66	55.92	23.03	0.38	9.93				99.61
"Svetl678"		0	33.56	37.32	16.11	0.27	12.79				100.05
"Svetl679"		0.13	13.57	47.69	20.16	0.33	17.29				99.17
"Svetl680"		3.09	6.12	56.85	22.74	0.36	11.23				100.39
"Svetl681"		0.75	11.55	55.14	19.36	0.31	13.01				100.12
"Svetl682"		0.19	10.2	56.9	20.82	0.35	10.88				99.34
"Svetl683"		0.03	12.25	57.75	18.08	0.34	10.98				99.43
"Svetl684"		3.01	10.01	51.81	23.92	0.4	10.8				99.95
"Svetl686"		0	34.15	36.51	15.86	0.27	13.3				100.09
"Svetl687"		0.14	17.85	52.66	17.16	0.33	11.8				99.94
"Svetl688"		1.59	11.53	53.05	20.71	0.37	11.84				99.09
"Svetl689"		0.49	36.26	30.35	13.35	0.19	19.08				99.72
"Svetl690"		0.03	41.71	25.92	14.57	0.21	16.95				99.39
"Svetl691"		0.53	10.69	58.31	18.04	0.34	11.19				99.1
"Svetl692"		0	35.65	34.54	16.01	0.23	13.57				100
"Svetl693"		2.9	3.24	57.14	26.67	0.41	8.89				99.25
"Svetl694"		0.8	7.95	56.5	24.7	0.42	9.42				99.79
"Svetl695"		0.79	9.9	54.11	23.29	0.34	11.2				99.63
"Svetl696"		0.75	7.42	57.19	24.75	0.41	9.88				100.4
"Svetl697"		0.16	11.41	58.61	17.18	0.38	11.66				99.4
"Svetl698"		0.06	9.34	60.86	16.34	0.35	12.18				99.13
"Svetl699"		2.03	8.41	50.91	31.11	0.33	7.02				99.81
"Svetl700"		3.61	7.52	51.34	27.93	0.4	8.94				99.74
"Svetl701"		0.55	13.91	55.21	18.03	0.37	11.37				99.44
"Svetl702"		0.02	6.04	65.59	14.9	0.35	12.57				99.47
"Svetl703"		2	4.48	58.34	24.39	0.41	9.85				99.47
"Svetl704"		0	37.67	30.65	15.68	0.28	15.54				99.82
"Svetl705"		2.76	12.58	46.31	25.62	0.39	11.46				99.12
"Svetl706"		0.14	8.92	58.29	19.8	0.4	11.57				99.12
"Svetl707"		0.67	6.52	58.13	24.83	0.44	10.13				100.72
"Svetl708"		0.18	8.38	61.7	15.74	0.39	12.75				99.14
"Svetl709"		0	31.58	36.63	16.68	0.29	14.03				99.21
"Svetl710"		0	32.11	35.7	16.74	0.29	14.28				99.12
"Svetl711"		0.16	9.89	58.66	17.17	0.32	13.51				99.71
"Svetl712"		2.79	2.78	58.14	25.09	0.4	10.58				99.78
"Svetl713"		3.3	2.9	56.01	26.71	0.39	10.06				99.37
"Svetl714"		3.27	2.84	55.96	27.33	0.41	9.88				99.69
"Svetl715"		3.27	2.93	56.15	26.29	0.43	11.01				100.08
"Svetl716"		0	29.11	40.93	16.29	0.29	13.64				100.26
"Svetl717"		0	28.74	40.38	16.22	0.32	13.94				99.6
"Svetl718"		0	30.07	40.37	16.41	0.32	13.1				100.27
"Svetl719"		0	27.71	42.79	16.79	0.34	12.98				100.61
"Svetl720"		0.19	38.47	29.42	14.5	0.23	16.56				99.37
"Svetl721"		3.58	6.37	50.61	28.71	0.44	9.38				99.09
"Svetl722"		3.26	4.36	56.23	24.37	0.4	11.55				100.17
"Svetl723"		0.33	10.38	53.45	22.67	0.38	11.94				99.15
"Svetl724"		0.01	9.28	61.38	16.24	0.35	12.66				99.92
"Svetl725"		0	32.26	35.37	16.58	0.3	14.63				99.14
"Svetl726"		0.17	37.63	30.31	14.7	0.28	16.26				99.35
"Svetl727"		0.68	6.09	57.28	24.92	0.44	9.81				99.22
"Svetl728"		0	33.74	34.72	16.95	0.25	13.6				99.26
"Svetl729"		0.08	46	23.43	14.39	0.17	16.82				100.89
"Svetl730"		0.74	7.97	59.06	21.05	0.45	10.62				99.89
"Svetl731"		0.73	9.17	54.09	24.14	0.4	10.95				99.48
"Svetl732"		0	5.18	65.05	15.88	0.36	12.79				99.26
"Svetl733"		1.72	6.19	53.86	27.84	0.39	9.86				99.86
"Svetl734"		0.17	39.92	28.84	14.97	0.22	16.34				100.46
"Svetl735"		0.18	39.88	28.97	14.79	0.24	16.56				100.62
"Svetl736"		0	33.06	35.52	16.8	0.29	13.58				99.25
"Svetl737"		0	15.41	54.44	17.38	0.34	12.99				100.56
"Svetl738"		3.53	7.8	50.41	26.29	0.39	10.86				99.28
"Svetl739"		0.17	39.44	29.19	14.58	0.24	16.45				100.07
"Svetl740"		0	32.07	38.32	15.99	0.25	13.44				100.07
"Svetl741"		3.88	5.18	48.21	33.6	0.41	8.29				99.57
"Svetl742"		2.87	7.52	57.1	20.58	0.36	12.23				100.66
"Svetl743"		0	33.55	36.99	15.6	0.25	14.46				100.85
"Svetl744"		0.71	10.14	55.85	19.66	0.33	13.11				99.8
					Ilmenites
"Svetl745"		55.01	0.39	2.41	28.9	0.25	13.31				100.27
"Svetl746"		47.26	0.21	0	49.56	3.49	0.27				100.79
"Svetl747"

## Sheet: LorikIlmSp
	Table 3-2. Microprobe analyses of chromites and ilmenites from Lorik pipe (wt.%)
Sample	SiO2	TiO2	Al2O3	Cr2O3	FeO	MnO	MgO	CaO	Na2O	K2O	Total
					Chromites
LorS001		5.68	5.19	47.29	26.99	0.43	13.46				99.04
LorS002		5.67	6.85	47.77	26.9	0.33	11.89				99.41
LorS003		5.52	4.12	42.46	39.51	0.36	7.48				99.45
LorS004		5.26	5.63	47.81	28.3	0.33	11.75				99.08
LorS005		4.94	5.67	45.09	34.93	0.39	8.05				99.07
LorS006		4.7	4.21	46.09	36.22	0.37	7.8				99.39
LorS007		4.67	5.4	45.78	34.54	0.43	8.21				99.03
LorS008		4.51	3.71	49.57	33.62	0.37	7.45				99.23
LorS009		4.49	3.56	48.92	34.31	0.43	7.37				99.08
LorS010		4.46	9.64	45.76	27.73	0.3	11.77				99.66
LorS011		4.43	4.05	49.21	34.38	0.42	8.49				100.98
LorS012		4.2	4.46	50.32	31.02	0.4	8.8				99.2
LorS013		4.11	8.25	52.77	21.36	0.39	12.99				99.87
LorS014		4.06	5.66	49.77	31.32	0.47	8.53				99.81
LorS015		3.86	6.92	47.83	31.9	0.38	9.3				100.19
LorS016		3.82	8.05	48.13	29.92	0.39	10.13				100.44
LorS017		3.71	4.81	50.06	31.48	0.41	8.97				99.44
LorS018		3.65	10.42	50.11	26.78	0.38	9.11				100.45
LorS019		3.65	5.05	54.64	26.87	0.4	8.75				99.36
LorS020		3.57	8.14	50.11	25.97	0.4	10.96				99.15
LorS021		3.5	7.19	50.38	24.03	0.42	13.54				99.06
LorS022		3.4	7.68	53.51	22.59	0.38	11.47				99.03
LorS023		3.34	4.59	53.53	28.12	0.45	9.68				99.71
LorS024		3.28	8.36	51.99	22.91	0.38	12.16				99.08
LorS025		3.28	4.49	58.26	22.71	0.33	10.47				99.54
LorS026		3.25	7.58	57.52	20.78	0.37	11.29				100.79
LorS027		3.2	10.83	49.54	23	0.39	12.27				99.23
LorS028		3.19	5.16	55.9	24.71	0.32	10.1				99.38
LorS029		3.16	7.77	56.04	21.52	0.33	10.99				99.81
LorS030		3.14	9.2	52.88	21.29	0.37	12.16				99.04
LorS031		3.05	5.65	52.13	28.64	0.38	9.7				99.55
LorS032		3.03	12.43	50.01	21.44	0.31	12.24				99.46
LorS033		2.99	8.25	53.14	23.72	0.4	10.63				99.13
LorS034		2.98	4.91	53.29	28.44	0.4	8.98				99
LorS035		2.97	6.76	52.83	26.21	0.39	9.96				99.12
LorS036		2.88	7.86	54.52	22.02	0.32	11.41				99.01
LorS037		2.65	8.31	56.51	19.33	0.34	12.16				99.3
LorS038		2.61	10.82	50.86	23.45	0.39	11.43				99.56
LorS039		2.55	4.89	56.7	24.04	0.37	10.53				99.08
LorS040		2.54	4.26	57.15	25.49	0.36	10.04				99.84
LorS041		2.44	5.45	55.37	27.25	0.43	9.45				100.39
LorS042		2.3	7.46	58.55	20.3	0.36	11.6				100.57
LorS043		2.19	9.6	48.51	28.75	0.34	10.09				99.48
LorS044		2.19	10.55	55	17.64	0.31	13.45				99.14
LorS045		2.15	5.9	59.49	19.61	0.38	11.49				99.02
LorS046		1.84	14.52	51.07	16.7	0.28	15.15				99.56
LorS047		1.81	9.5	51.05	26.85	0.36	9.54				99.11
LorS048		1.8	4.52	60.31	23.08	0.38	9.92				100.01
LorS049		1.79	9.1	55.04	21.99	0.4	11.51				99.83
LorS050		1.74	9.84	54.98	22.71	0.37	10.41				100.05
LorS051		1.68	7.95	56.5	21.93	0.44	10.62				99.12
LorS052		1.66	14.73	45.72	27.25	0.35	9.83				99.54
LorS053		1.64	13.34	47.49	27.17	0.41	9.94				99.99
LorS054		1.53	8.5	58.79	20.41	0.35	10.19				99.77
LorS055		1.42	6.05	57.66	25.55	0.43	9.63				100.74
LorS056		1.18	3.77	60.12	25.23	0.44	9.17				99.91
LorS057		1.15	6.23	61.24	19.71	0.33	12.1				100.76
LorS058		1.12	9.07	55.83	23.69	0.39	10.34				100.44
LorS059		1.07	5.19	63.5	18.35	0.35	11.39				99.85
LorS060		1.07	7.3	61.15	19.32	0.36	11.71				100.91
LorS061		1.06	8.31	60.43	18.27	0.37	11.8				100.24
LorS062		0.99	9.66	58.57	18.17	0.34	12.48				100.21
LorS063		0.98	9.82	58.79	18.26	0.33	12.54				100.72
LorS064		0.97	13.85	52.52	20.92	0.32	10.79				99.37
LorS065		0.97	10.72	53.29	23.77	0.38	10.26				99.39
LorS066		0.95	10.95	54.31	23.07	0.34	10.54				100.16
LorS067		0.92	12.22	57.65	18.24	0.31	10.66				100
LorS068		0.88	11.9	55.21	21.65	0.36	9.72				99.72
LorS069		0.85	14.2	52.3	17.67	0.28	14.04				99.34
LorS070		0.77	10.22	56.69	20.39	0.32	10.61				99
LorS071		0.77	11.47	56.33	20.87	0.38	10.98				100.8
LorS072		0.76	11.31	56.86	18.85	0.38	11.7				99.86
LorS073		0.76	9.91	59.04	17.95	0.33	11.82				99.81
LorS074		0.72	11.43	55.81	21.29	0.36	11.09				100.7
LorS075		0.7	10.34	55.84	21.68	0.35	11.45				100.36
LorS076		0.62	7.12	59.78	22.39	0.39	10.1				100.4
LorS077		0.62	7.22	60.12	21.69	0.36	10.26				100.27
LorS078		0.61	25.37	45.95	12.89	0.23	14.76				99.81
LorS079		0.57	15.01	54.71	17.84	0.34	12.25				100.72
LorS080		0.56	6.36	59.88	20.22	0.35	11.9				99.27
LorS081		0.52	8.03	62.68	15.39	0.31	12.24				99.17
LorS082		0.52	11.35	56.47	20.67	0.36	11.24				100.61
LorS083		0.51	11.48	55.44	22.13	0.37	10.82				100.75
LorS084		0.51	11.21	54.28	21.93	0.34	11.11				99.38
LorS085		0.5	12.74	55.3	19.98	0.32	10.7				99.54
LorS086		0.5	11.1	56.59	20.94	0.38	11.46				100.97
LorS087		0.5	11.82	54.26	21.51	0.34	11.08				99.51
LorS088		0.5	12.18	54.81	21.44	0.31	11.02				100.26
LorS089		0.49	11.77	56.13	20.67	0.33	11.6				100.99
LorS090		0.49	10.94	56.58	20.84	0.32	11.58				100.75
LorS091		0.47	12.06	55.5	21.25	0.39	10.74				100.41
LorS092		0.46	10.66	56.25	19.96	0.33	11.62				99.28
LorS093		0.44	12.86	56.49	17.57	0.32	12.5				100.18
LorS094		0.39	12.46	54.72	20.12	0.36	11.14				99.19
LorS095		0.39	14.71	54.79	17.03	0.34	12.04				99.3
LorS096		0.37	12.04	57.45	18.02	0.33	11.53				99.74
LorS097		0.37	13.08	57.69	17.1	0.34	12.41				100.99
LorS098		0.37	11.89	55.51	20.68	0.33	10.54				99.32
LorS099		0.35	15.06	50.8	20.5	0.34	12.21				99.26
LorS100		0.35	15.06	54.16	18.08	0.36	11.48				99.49
LorS101		0.34	16.84	51.62	17.64	0.35	12.32				99.11
LorS102		0.34	9.14	62.44	15.49	0.33	12.49				100.23
LorS103		0.33	18.7	49.36	17.95	0.3	12.75				99.39
LorS104		0.3	12.61	55.92	19.6	0.37	11.42				100.22
LorS105		0.29	7.85	61.9	17.83	0.34	12.72				100.93
LorS106		0.29	14.24	55.42	17.58	0.32	11.6				99.45
LorS107		0.28	13.57	56.71	16.61	0.34	11.98				99.49
LorS108		0.28	15.91	53.44	17.78	0.35	11.6				99.36
LorS109		0.27	9.5	59.81	18.95	0.39	11.36				100.28
LorS110		0.26	10.18	59.47	19.63	0.36	10.75				100.65
LorS111		0.24	11.67	55.02	20.37	0.33	11.99				99.62
LorS112		0.24	17.39	53.27	16.55	0.31	12.83				100.59
LorS113		0.23	13.87	56.81	15.82	0.33	12.69				99.75
LorS114		0.22	12.06	56.12	19.73	0.35	11.12				99.6
LorS115		0.22	16.72	52.88	17.67	0.34	11.56				99.39
LorS116		0.21	9.92	59.97	16.74	0.35	11.88				99.07
LorS117		0.2	16.97	54.12	16.66	0.32	12.22				100.49
LorS118		0.2	15.7	54.15	17.29	0.36	11.91				99.61
LorS119		0.2	15.84	53.8	17.55	0.34	11.76				99.49
LorS120		0.19	16.74	54.57	16.54	0.3	12.62				100.96
LorS121		0.18	8.74	62.46	15.01	0.31	12.7				99.4
LorS122		0.18	14.79	55.09	17.33	0.34	12.77				100.5
LorS123		0.18	28.07	42.35	12.81	0.19	16.4				100
LorS124		0.17	10.2	62.84	13.41	0.3	13.4				100.32
LorS125		0.17	17	52.54	17.43	0.3	11.71				99.15
LorS126		0.17	10.6	60.68	16.25	0.35	11.74				99.79
LorS127		0.16	15.43	55.95	17.52	0.35	11.56				100.97
LorS128		0.16	10.31	61.69	16.23	0.34	12.22				100.95
LorS129		0.15	16.02	55.64	16.61	0.29	10.68				99.39
LorS130		0.15	13.26	55.55	18.62	0.36	11.19				99.13
LorS131		0.15	10.21	62.01	15.93	0.32	11.89				100.51
LorS132		0.13	30.87	40.13	15.36	0.26	13.84				100.59
LorS133		0.13	13.65	56.52	18.03	0.35	11.94				100.62
LorS134		0.13	15.73	54.98	16.47	0.3	11.91				99.52
LorS135		0.13	11.92	55.52	20.53	0.31	11.14				99.55
LorS136		0.13	10.25	58.55	20.01	0.38	11.51				100.83
LorS137		0.13	8.56	58.97	20.39	0.35	11.68				100.08
LorS138		0.12	13.88	57.52	16.85	0.32	11.95				100.64
LorS139		0.11	12.88	57.27	18.67	0.33	10.49				99.75
LorS140		0.11	13.88	55.75	17.96	0.36	12.31				100.37
LorS141		0.1	16.01	54.44	16.97	0.3	12.02				99.84
LorS142		0.09	16.2	53.29	17.63	0.32	11.82				99.35
LorS143		0.09	13.48	56.8	17.81	0.34	11.52				100.04
LorS144		0.08	12.92	58.69	16.82	0.35	11.78				100.64
LorS145		0.08	13.34	58.23	16.68	0.35	11.98				100.66
LorS146		0.08	9.83	61.56	15.18	0.34	13.29				100.28
LorS147		0.08	12.69	57.42	17.8	0.35	11.85				100.19
LorS148		0.07	7.13	64.44	17.33	0.3	11.35				100.62
LorS149		0.07	12.32	55.21	19.95	0.38	11.53				99.46
LorS150		0.07	15.01	56.06	15.15	0.33	12.92				99.54
LorS151		0.07	12.08	58.47	17	0.3	12.62				100.54
LorS152		0.06	12.5	58.46	17.99	0.32	11.19				100.52
LorS153		0.06	13.48	56.82	16.25	0.37	12.89				99.87
LorS154		0.05	11.93	58.86	16.4	0.35	11.53				99.12
LorS155		0.04	14.37	56.61	16.77	0.33	11.23				99.35
LorS156		0.03	12.94	56.03	18.73	0.29	11.43				99.45
LorS157		0.03	46.45	21.33	17.78	0.18	14.64				100.41
LorS158		0.03	11.31	56.66	19.36	0.38	12.08				99.82
LorS159		0.02	44.36	27.66	11.31	0.2	16.44				99.99
LorS160		0.02	44.55	27.51	11.41	0.16	15.63				99.28
LorS161		0.01	34.92	34.74	15.4	0.25	14.29				99.61
LorS162			33.06	35.58	16.12	0.25	14.22				99.23
LorS163			22.83	48.84	14.01	0.28	13.54				99.5
					Ilmenites
"Lorik865"		49.27	0.33	0.02	48.18	0.85	1.68				100.33
"Lorik866"		48.38	0.34	0.01	47.71	0.44	1.12				98
"Lorik867"		50.08	0.28	0	46.93	0.65	1.49				99.43
"Lorik868"		50.76	0.3	0.01	44.62	0.78	2.99				99.46
"Lorik869"		45.43	0.25	0.03	52.81	0.2	1.07				99.79
"Lorik870"		44.87	0.27	0.09	52.65	0.3	2				100.18
"Lorik871"		44.76	0.31	0.14	52.94	0.77	1.48				100.4
"Lorik872"		44.07	0.26	0.11	54.31	0.34	0.91				100
"Lorik873"		44.67	0.36	0.15	53.22	0.39	1.61				100.4
"Lorik874"		48.74	0.29	0.07	47.69	0.41	3.1				100.3
"Lorik875"		50.64	0.49	0	42.06	5.07	0.75				99.01
"Lorik876"		53.38	0.36	0.08	39.26	0.69	7.09				100.86

## Sheet: LorikGarCpx
	Table 3-1. Microprobe analyses of garnets and clinopyroxenes from Lorik kimberlite pipe (wt.%)
Sample	SiO2	TiO2	Al2O3	Cr2O3	FeO	MnO	MgO	CaO	Na2O	K2O	Total
					Garnets
"Lorik782"		41.61	0.56	21.44	2.13	7.6	0.2	21.28	4.62	0	99.44
"Lorik780"		38.41	0.02	22.46	0.05	24.53	0.14	11.12	2.87	0.011	99.611
"Lorik786"		42.1	0	20.84	3.84	5.94	0.24	26.21	0.54	0	99.71
"Lorik788"		37.59	0.08	22.56	0.06	26.22	0.28	9.39	3.57	0.014	99.764
"Lorik785"		37.18	0.03	22.68	0.06	25.95	0.25	9.96	3.64	0.015	99.765
"Lorik752"		43.95	0.02	20.89	3.42	6.33	0.32	22.65	2.24	0	99.82
"Lorik787"		42.17	0.81	21.44	1.29	7.49	0.17	22.06	4.44	0	99.87
"Lorik792"		38.45	0.04	21.39	0.05	26.53	0.24	8.62	3.85	0.015	99.185
"Lorik766"		41.6	0	20.05	4.42	6.31	0.2	26.11	0.54	0	99.23
"Lorik774"		42.83	0	19.6	4.25	6.18	0.2	25.65	0.55	0	99.26
"Lorik779"		38.21	0.04	21.44	0.06	26.98	0.24	8.81	3.52	0.014	99.314
"Lorik777"		41.02	1.08	19.2	2.15	8.66	0.17	22.25	4.86	0	99.39
"Lorik763"		41.79	1.07	19.36	2.37	8.65	0.18	21	5.01	0	99.43
"Lorik776"		38.3	0.04	21.38	0.06	26.2	0.27	9.44	3.74	0.015	99.445
"Lorik751"		42.44	0.94	20.91	1.37	7.6	0.25	21.37	4.75	0	99.63
"Lorik784"		38.33	0.03	21.69	0.03	26.02	0.24	9.93	3.56	0.014	99.844
"Lorik761"		42.06	1.09	19.36	2.45	8.67	0.18	21.16	4.96	0	99.93
"Lorik768"		42.02	1.06	19.3	2.36	8.82	0.22	21.23	4.92	0	99.93
"Lorik789"		38.23	0.03	21.7	0.07	27.41	0.26	8.37	3.93	0.016	100.016
"Lorik790"		37.74	0.04	21.78	0.04	27.28	0.24	8.96	3.94	0.016	100.036
"Lorik778"		41.6	0.58	20.18	2.16	8.05	0.18	22.61	4.68	0	100.04
"Lorik791"		38.28	0.04	21.55	0.03	27.42	0.27	8.73	3.77	0.015	100.105
"LorD795 "		50.7	2.61	0.57	0.13	4.74	0.07	17.52	23.27	0.52	100.13
"Lorik757"		42.58	0.77	20.09	1.42	8.17	0.2	22.53	4.37	0	100.13
"Lorik770"		38.55	0.02	21.58	0.05	27.07	0.29	8.88	3.7	0.015	100.155
"Lorik758"		38.97	0.02	21.81	0.07	25.48	0.21	10.86	2.86	0.011	100.291
"Lorik783"		39.04	0.03	21.4	0.03	24.85	0.16	12.07	2.75	0.011	100.341
"Lorik781"		38.31	0.05	21.65	0.06	26.33	0.29	10.04	3.63	0.015	100.375
"Lorik750"		44.05	0.63	20.72	1.51	7.56	0.27	20.93	4.73	0	100.4
"Lorik759"		38.75	0.03	20.77	0.04	27.45	0.28	9.39	3.69	0.015	100.415
"Lorik754"		38.77	0.03	21.61	0.04	26.94	0.4	8.99	3.69	0.015	100.485
"Lorik753"		43.23	0.02	20.96	6.21	5.63	0.33	23.58	0.56	0	100.52
"Lorik772"		38.41	0.04	20.88	0.1	27.13	0.31	9.9	3.8	0.015	100.585
"Lorik775"		38.9	0.05	21.34	0.05	26.48	0.27	9.8	3.72	0.015	100.625
"Lorik769"		38.99	0.06	21.19	0.05	26.68	0.3	9.74	3.64	0.015	100.665
"Lorik749"		40.86	0.02	22.23	0.05	24.99	0.21	10.8	1.5	0.006	100.666
"Lorik771"		38.62	0.04	21.6	0.04	26.98	0.3	9.46	3.63	0.015	100.685
"Lorik756"		39.13	0.03	20.46	0.1	27.92	0.42	8.89	3.76	0.015	100.725
"Lorik773"		38.25	0.03	21.64	0.05	27.64	0.31	9.14	3.68	0.015	100.755
"Lorik748"		42.05	0.49	19.12	5.02	7.68	0.34	20.82	5.28	0	100.8
"Lorik755"		39.34	0.04	21.13	0.09	27.13	0.4	8.4	3.76	0.015	100.305
"Lorik767"		39.43	0.02	20.36	0.03	25.36	0.21	11.49	2.8	0.011	99.711
"Lorik765"		39.08	0.05	21.31	0.04	26.31	0.31	9.7	3.54	0.014	100.354
"Lorik764"		39.04	0.03	21.57	0.03	26.57	0.26	9.49	3.64	0.015	100.645
"Lorik760"		38.87	0.03	21.63	0.1	26.63	0.29	9.63	3.63	0.015	100.825
"Lorik762"		38.59	0.03	22.38	0.08	26.18	0.26	9.73	3.6	0.014	100.864
					Clinopyroxenes
"LorD794 "		54.28	0.12	0.9	0.77	2.73	0.12	16.32	22.9	0.96	99.1
"LorD793 "		54.2	0.09	0.24	0.78	0.94	0.04	17.61	24.56	0.72	99.18
"LorD794 "		54.28	0.12	0.9	0.77	2.73	0.12	16.32	22.9	0.96	99.1
"LorD795 "		50.7	2.61	0.57	0.13	4.74	0.07	17.52	23.27	0.52	100.13
