# Supplementary material for: Unique Amphibole Bearing Mantle Column Beneath the Leningrad Kimberlite Pipe, West Ukukit Field, NE Yakutia
Source: Preprints.org preprint supplement (doi:10.20944/preprints202112.0444.v1), 2021-12-28
Supplement: Supplementary file 6 [file SupplementaryFile2 ICPDataMinerals.xls]

## Sheet: DataAmfLen
	Clinopyroxenes
Sample	La	Ce	Pr	Nd	Sm	Eu	Gd	Tb	Dy	Ho	Er	Tm	Yb	Lu	Cs	Rb	Ba	Th	U	Nb	Ta	Pb	Sr	Hf	Zr	Y		Sample		SiO2	TiO2	Al2O3	Cr2O3	FeO	MnO	MgO	CaO	Na2O	K2O	Total
LenD4-79	14.015	36.1664	6.33389	28.9376	5.89828	1.41496	4.71225	0.449431	1.91615	0.308434	0.603439	0.0650225	0.312556	0.0449764	0.0230742	0.114425	3.22502	0.543752	0.0437995	2.83643	0.230508	1.1782	1065	2.73895	102.003	9.89097		LenD4-79		52.54	1.49	0.46	0.11	4.78	0.08	14.93	23.92	1.06	0	99.37
LenD4-47	485.56	610.064	54.1507	160.234	17.4368	4.40207	13.811	1.02646	4.79674	0.879862	2.09321	0.284862	1.52017	0.195969	0.101527	2.56457	42.2983	21.2034	4.69944	0.858912	3.81968	9.61391	3240.59	0.794858	144.637	35.8562		LenD4-47		54.59	0.31	2.69	3.14	2.39	0.08	15.37	18.12	3.22	0.01	99.92
LenD5-132	1.7642	5.02105	0.708513	4.5991	2.03248	0.797405	3.48827	0.646604	4.3709	0.902589	2.20635	0.232224	1.66224	0.22167	0.156905	3.7964	45.5761	0.325037	0.402168	1.07863	0.000131815	1.53741	220.908	0.909778	50.935	41.5181		LenD5-132		52.91	0.12	2.13	1.72	1.77	0.06	17.35	23.29	0.39	0	99.74
LenD4-43	41.6006	126.489	20.8467	100.81	23.9735	6.2271	20.4211	2.16898	10.8213	1.38961	3.07383	0.322018	1.52017	0.183119	0.0876822	0.63944	4.90312	0.188337	0.0119453	18.5179	0.166675	1.30752	1975.46	17.8917	678.346	53.0135		LenD4-43		54.63	0.18	1.82	3.2	2.36	0.08	16.09	18.76	2.78	0.03	99.93
	Olivine
OL5-17	8.07289	10.0278	0.894594	2.59814	0.350924	0.0835766	0.265189	0.0405934	0.229327	0.0649331	0.207432	0.0283304	0.213106	0.064252	0.0738378	0.558674	4.95607	0.419223	0.149324	0.00089125	0.109936	0.402311	340.43	0.00957653	0.494231	1.75168		OL5-17		40.686	0.008	0.001	0.013	7.679	0.091	51.801	0.008	0	0	100.287
	Orthopyroxenes
Opx18-7	15.2652	38.9926	4.63734	20.4475	5.04142	1.10508	3.71267	0.501624	3.30634	0.717522	1.48975	0.238416	1.71907	0.311624	0.419957	14.989	31.861	11.8691	4.4624	1.33831	5.41228	7.3138	58.0781	1.22581	132.036	29.4692		sv18-7		57.71	0	1.1	0.37	4.91	0.11	35.33	0.27			99.8
	Clinopyroxenes
	La	Ce	Pr	Nd	Sm	Eu	Gd	Tb	Dy	Ho	Er	Tm	Yb	Lu	Cs	Rb	Ba	Th	U	Nb	Ta	Pb	Sr	Hf	Zr	Y				SiO2	TiO2	Al2O3	Cr2O3	FeO	MnO	MgO	CaO	Na2O	K2O	Total
Lgam087	91.5329	193.584	31.8451	147.66	29.1723	4.15502	23.6412	2.22923	10.3784	1.52321	3.74186	0.375327	2.96259	0.369606	0.00606266	1.31988	131.727	1.54466	0.17951	2.38316	2.41092	1.2429	414.909	2.34496	68.1117	60.7606		Lgam087		44.08	0.44	13.51	0.02	4.97	0.05	18.47	12.51	2.57	1.11	97.73
Lgam373	66.4754	151.494	25.5365	131.555	28.1579	3.21291	21.4241	2.21689	10.6392	1.6236	3.50827	0.454426	2.5031	0.358357	0.00808355	0.75035	85.4705	0.787826	0.122941	2.31875	2.04998	1.00121	384.276	2.0884	57.6258	59.9718		Lgam373		44.22	0.38	14.22	1.39	3.7	0.06	18.09	12.05	3.57	0.05	97.73
Lgam229	67.5191	83.4204	6.8123	17.8716	1.5054	1.0468	1.33409	0.0662835	0.274137	0.0732871	0.3083	0.052731	0.692625	0.144627	0.0070731	3.42314	168.845	1.55937	0.160654	0.0368049	0.0280991	0.970319	422.997	0.00900141	0.839236	2.85172		Lgam229		44.23	0.08	12.22	1.38	2.91	0.04	20.64	12.75	2.92	0.57	97.74
Lam5-18	26.606	69.1488	5.61122	22.5692	3.65604	0.883597	3.13086	0.265137	1.31052	0.175253	0.355012	0.0418746	0.23316	0.0401739	0.00456987	1.9183	23.4311	0.127487	0.00754232	3.6438	3.90956	1.33739	304.635	3.56479	170.434	5.69851		Lam5-18		44.4086	0.4643	12.0612	1.2663	3.8858	0.0485	18.9617	12.1345	3.0402	0.9827	97.2538
Lgam249	29.0981	39.42	4.50143	14.8483	1.97649	0.608487	1.53851	0.172646	0.956143	0.200744	0.789441	0.110115	0.905215	0.155876	0.00909399	6.5739	433.81	0.836864	0.0429913	0.322044	0.0192257	0.797691	279.93	0.342056	20.6557	8.59459		Lgam249		44.42	0.05	12.54	1.47	2.98	0.04	20.05	12.85	2.77	0.52	97.69
Lgam297	3.32794	10.521	2.52885	15.7488	4.90549	1.42684	4.0992	0.525657	2.64115	0.391933	0.873525	0.125624	0.733771	0.12695	0.00505222	1.39688	13.2789	0.063743	0.0075423	1.61944	1.05895	2.34054	891.876	1.57979	119.32	15.3947		Lgam297		44.44	0.36	12.9	1.35	3.55	0.05	19.18	12.33	3.17	0.39	97.72
Lam5-57	17.6651	39.7922	6.33942	31.6233	7.55809	1.82787	6.10047	0.747643	3.83139	0.591092	1.56489	0.217129	1.36469	0.170339	0.00808355	1.59503	43.8819	0.225554	0.0263981	4.85845	4.12558	1.23199	199.134	4.8927	296.399	21.7552		Lam5-57		44.5509	0.2976	13.2965	1.4887	2.5237	0.0369	19.1003	11.9028	3.7148	0.1678	97.08
Lgam168	46.6077	67.0051	6.27208	16.4565	1.19817	1.44783	0.946774	0.0616591	0.468039	0.0924055	0.490479	0.0728929	0.624048	0.133378	0.00606266	1.27177	151.995	1.00849	0.132746	0.0552073	0.0221835	0.532393	293.328	0.0450071	1.94043	4.38622		Lgam168		45.72	0.05	11.98	1.44	2.83	0.04	19.68	12.76	2.54	0.69	97.73
Lgam252	26.2844	61.1756	10.3053	45.7089	8.7769	1.82787	5.54097	0.55957	2.38706	0.363255	0.621275	0.111666	0.480036	0.0755271	0.0070731	0.756122	28.4457	0.140562	0.0150846	0.754505	2.42571	1.24289	352.015	0.526588	71.2074	12.4785		Lgam252		45.01	0.07	12.53	1.5	2.98	0.04	19.59	12.83	2.66	0.51	97.72
Lam5-81	40.3409	94.5059	15.2876	76.6851	16.1926	1.79523	12.492	1.30417	6.21867	0.955962	2.34036	0.293126	1.57042	0.236225	0.00606266	0.461748	70.638	0.408617	0.0724067	1.43541	1.21278	0.790422	246.743	1.18371	30.1511	37.1265		Lam5-81		45.0464	0.3218	12.0118	1.3889	4.2737	0.0302	18.5112	11.7504	3.2387	0.7621	97.3352
Lam5-56	3.79956	12.3546	2.72297	16.6495	5.03863	1.31959	3.83021	0.487117	2.4138	0.328203	0.864182	0.0790965	0.569186	0.078741	0.00202089	0.367473	18.3893	0.107873	0.0011508	1.84948	1.43465	2.11337	870.879	1.57529	114.581	13.7046		Lam5-56		45.0751	0.3033	11.7209	1.7963	4.2233	0.0332	18.3954	11.8341	3.1487	0.7535	97.2838
Lgam209	4.04354	5.18054	0.676126	2.63651	0.645168	0.137548	0.355039	0.0508687	0.274137	0.0844399	0.19619	0.0403237	0.322309	0.080348	0.00606266	4.31814	190.937	0.429865	0.0256439	0.009269	0.0414093	0.545113	314.42	0.0135021	1.35241	2.38001		Lgam209		45.28	0.29	11.49	1.69	2.44	0.03	20.43	12.76	2.7	0.61	97.72
Lam5-124	11.7342	28.5065	4.99345	24.7631	5.51998	1.33358	4.34666	0.500991	2.78157	0.387153	0.840825	0.113217	0.665194	0.0899898	0.00505222	1.24676	11.7624	0.178155	0.00527961	4.15911	1.73787	0.966684	190.165	3.87988	156.018	13.3818		Lam5-124		45.2966	0.051	12.8338	0.9425	2.4882	0.0027	26.2199	0.0042	2.3576	7.2355	97.432
Lgam366	8.17235	23.8549	4.8801	26.8863	6.19593	1.4758	4.60489	0.488659	2.07947	0.329796	0.569891	0.100809	0.562328	0.0771341	0.00707311	1.07936	17.2466	0.101335	0.00301692	2.19914	2.83106	1.8226	376.346	1.6158	152.904	11.6512		Lgam366		45.38	0.31	11.99	1.31	1.97	0.05	20.69	11.91	3.41	0.2	97.22
Lgam192	14.5771	44.5923	8.55067	44.9526	9.17634	2.03072	6.76758	0.645898	2.90862	0.426985	0.896881	0.111666	0.658336	0.0915967	0.00707311	0.85425	14.3728	0.230458	0.0188558	2.26354	2.96125	1.26652	470.767	2.25945	181.171	16.7106		Lgam192		45.39	0.06	11.63	1.8	3.01	0.05	19.84	12.32	3.02	0.63	97.75
Lgam186	8.83182	18.6223	3.11961	14.0443	2.81626	0.69475	1.83977	0.218891	1.24366	0.148168	0.266259	0.0418746	0.246875	0.0674923	0.009094	1.71625	18.4308	0.0849907	0.00075423	2.72363	3.63438	1.00666	295.59	2.60153	180.896	5.12097		Lgam186		45.6	0.32	11.47	1.65	2.47	0.05	20.09	12.68	2.75	0.64	97.72
Lgam153	28.3176	29.141	2.29016	5.57865	0.686131	0.345039	0.527179	0.0739909	0.581707	0.183219	0.537192	0.0853002	1.01494	0.152662	0.0101044	3.6483	219.478	1.49398	0.110873	0.184025	0.0088734	0.670493	258.091	0.12602	6.1531	5.38398		Lgam153		45.69	0.01	12.85	1.29	2.62	0.04	19.34	12.74	2.41	0.74	97.73
Lgam208	44.0978	103.154	17.5196	90.1626	18.4769	2.11466	14.2999	1.41363	7.22846	1.12486	2.45715	0.300881	1.92703	0.236225	0.0111149	0.694555	87.0678	0.640719	0.0897542	1.55503	1.36069	0.837667	263.84	1.39075	33.9454	42.145		Lgam208		45.69	0.28	11.67	1.8	2.47	0.04	19.84	12.64	2.69	0.61	97.73
Lgam138	6.5859	8.75	1.12932	4.04325	0.624686	0.184175	0.462626	0.0801568	0.52153	0.125863	0.60259	0.0884021	0.918931	0.226583	0.0131358	3.58479	175.886	0.179789	0.032432	0.0184024	0.0133101	0.592359	267.295	0.0495078	1.50744	5.79883		Lgam138		45.7	0.34	11.63	1.15	3.26	0.03	19.42	11.77	2.94	0.81	97.05
Lgam255	9.06007	14.2482	1.72364	7.34734	1.17769	0.331051	0.731597	0.070908	0.314254	0.0541687	0.107437	0.0108564	0.0685762	0.0144626	0.00505222	1.5527	15.9177	0.112777	0.0497796	1.06735	0.45995	0.508771	246.986	1.01718	57.2295	2.10351		Lgam255		45.7	0.07	11.89	1.52	2.83	0.05	19.68	12.9	2.54	0.5	97.68
	La	Ce	Pr	Nd	Sm	Eu	Gd	Tb	Dy	Ho	Er	Tm	Yb	Lu	Cs	Rb	Ba	Th	U	Nb	Ta	Pb	Sr	Hf	Zr	Y														97.73
Lgam226	14.0949	61.1354	6.68728	35.2734	9.99545	1.81315	4.94457	0.53246	2.11123	0.337627	0.618386	0.0679052	0.501599	0.0628166	0.0356319	4.39081	43.3209	0.150097	2.98309	165.513	5.78264	0.960238	540.268	4.36384	260.74	13.7359		Lgam226		46.15	0.3	11.51	1.66	2.44	0.05	19.88	12.59	2.58	0.58	97.74
Lgam251	12.1853	41.9636	4.56918	23.8563	6.05901	1.26435	3.62872	0.373288	1.65445	0.263685	0.555881	0.0568603	0.404932	0.0658647	0.0534494	12.3814	65.6611	0.0866061	0.000759413	113.16	6.02656	1.45688	541.672	4.46314	199.434	9.6066		Lgam251		46.29	0.29	11.44	1.55	2.39	0.04	19.97	12.73	2.5	0.51	97.71
Lam5-87	10.213	39.9918	4.11362	20.4978	5.4336	1.17469	3.024	0.324027	1.5855	0.214575	0.484815	0.0502722	0.3246	0.0592203	0.0656561	4.09231	82.1248	0.100549	0.00387934	141.799	5.07625	2.80557	593.742	4.14315	210.927	9.39188		Lam5-87		46.2902	0.035	11.1277	1.7241	3.0727	0.0446	19.3343	12.1367	2.911	0.7149	97.3912
Lam5-99	14.3338	51.6135	5.07842	25.4814	5.57304	1.47615	3.72279	0.371793	1.78304	0.281696	0.555265	0.0680981	0.469476	0.0541085	0.0718921	9.88507	89.4809	0.0591645	0.00542134	95.513	3.47816	2.12541	374.922	6.77628	223.812	9.11635		Lam5-99		46.3638	0.3581	10.4754	0.5907	2.9572	0.0338	20.294	12.1409	3.1724	0.638	97.0243
Lgam371	15.1609	57.5052	5.80941	27.7406	5.6589	1.45835	3.76352	0.397954	1.79542	0.258612	0.569663	0.061685	0.461884	0.0636679	0.0863157	9.17041	76.0821	0.0423	0.0065908	90.0532	3.1756	2.06556	396.192	7.58412	255.736	11.1383		Lgam371		46.38	0.04	12.38	1.34	2.29	0.04	19.73	12.7	2.69	0.15	97.74
Lgam135	21.3619	83.5786	9.306	48.2631	9.02002	2.25933	7.20593	0.728453	3.19181	0.459084	1.02979	0.105069	0.798134	0.112018	0.024225	3.36938	60.7046	0.0559606	0.00285758	143.008	4.60794	1.72972	681.172	2.86768	196.675	16.7778		Lgam135		46.45	0.39	10.75	1.57	2.53	0.03	20.21	12.71	2.28	0.82	97.74
Lgam347	58.6133	179.293	19.9893	109.856	18.9665	2.84508	12.5048	1.37594	5.99636	0.994062	2.23012	0.257678	1.80413	0.23698	0.0426552	1.21387	180.148	0.368618	0.0741399	302.785	1.91951	0.662921	346.269	1.64341	42.1151	43.4418		Lgam347		47.02	0.04	10.06	1.87	3.01	0.07	20.4	11.54	3.48	0.26	97.75
Lgam171	63.2324	201.322	24.374	128.057	22.2541	3.13287	14.5094	1.56892	6.99218	1.13874	2.63966	0.292464	2.12747	0.273786	0.0698432	2.92875	258.282	0.358796	0.0890284	396.257	2.13426	0.952997	440.067	1.91643	42.0341	53.5375		Lgam171		47.97	0.35	10.67	0.6	2.28	0.02	19.74	11.92	3.05	0.68	97.28
Lam5-130	16.0829	52.3619	5.61265	28.6619	4.7664	1.55908	3.88698	0.362546	2.00868	0.304044	0.610289	0.0717453	0.544999	0.0862434	0.121025	8.9195	86.7477	0.0865394	0.0109705	92.0971	3.27706	2.08622	374.067	8.18059	248.615	10.4591		Lam5-130		50.1376	0.1698	7.6195	0.2013	6.4807	0.1008	19.3652	9.7814	3.2593	0.2135	97.3291
Lam5-130	15.216	52.6972	5.51431	29.0489	5.22589	1.7725	4.24353	0.484973	1.83974	0.286738	0.626727	0.0686163	0.522859	0.0683683	0.0739856	7.78527	69.1708	0.0803635	0.0026729	76.5175	3.00048	1.80086	358.458	7.79025	240.604	10.2081		Lam5-130		50.1376	0.1698	7.6195	0.2013	6.4807	0.1008	19.3652	9.7814	3.2593	0.2135	97.3291
Lgam180	14.5356	45.3017	5.25521	28.6241	4.45686	1.59207	4.79405	0.449249	2.02056	0.321445	0.796642	0.0871479	0.454859	0.0618165	0.159177	13.1611	76.05	0.0944609	0.00210258	133.531	6.01817	1.65656	641.1	5.11791	236.833	12.1761		Lgam180		51.33	0.39	9.54	0.3	1.83	0.01	18.61	12.01	3.24	0.64	97.9
Lgam289	22.2514	90.3132	10.7956	60.9478	11.6081	3.48997	8.47901	0.938854	4.30595	0.700121	1.41047	0.153836	1.09505	0.201443	0.243147	4.29345	88.2258	0.0446767	0.00603297	299.881	5.30072	2.99037	745.681	4.18189	313.661	27.4962		Lgam289		51.7	0.36	4.06	0.81	3.11	0.06	23.04	10.66	3.51	0.4	97.71
Lgam289	12.2485	36.0399	3.97757	22.8883	4.10442	1.36145	2.52684	0.347736	1.56851	0.25965	0.50246	0.0521019	0.313799	0.0327337	0.192613	2.15657	88.2998	0.259719	0.010206	160.595	7.35381	3.09149	436.226	4.53167	303.488	9.8003		Lgam289		51.7	0.36	4.06	0.81	3.11	0.06	23.04	10.66	3.51	0.4	97.71
Lgam356	7.99153	22.2932	2.58527	13.1826	2.71338	1.08861	0.836222	0.125733	0.766015	0.125087	0.302015	0.0347542	0.292463	0.0491283	0.298692	18.0574	115.092	0.250241	0.0631271	63.3305	3.99873	2.34052	610.9	11.794	432.784	4.06732		Lgam356		51.71	0.18	7.82	0.06	6.4	0.12	17.88	9.81	2.95	0.24	97.17
Lgam223	6.36204	17.1609	1.64399	8.82486	1.95602	0.860395	1.94342	0.130607	0.527646	0.0996391	0.228837	0.0350541	0.308886	0.0616649	0.31013	16.6641	76.9433	0.283896	0.0291308	50.6047	2.95401	2.43864	533.435	10.6362	331.814	3.13004		Lgam223		51.77	0.29	4.64	1.47	2.75	0.05	22.11	10.16	3.92	0.58	97.74
Lgam344	5.04876	14.3662	1.20924	5.13798	2.65015	0.866742	2.11535	0.275756	0.459118	0.0695443	0.159719	0.0251189	0.261683	0.0842047	0.330172	20.2096	48.547	0.0463752	0.00536771	39.5903	1.72965	1.38779	713.386	9.14019	237.473	2.82503		Lgam344		51.85	0.11	5.01	1.49	2.8	0.06	22.13	10.04	3.98	0.26	97.73
Lgam359	13.7642	49.5084	6.29241	31.3595	5.04821	2.236	5.94411	0.514727	2.49769	0.412779	0.859825	0.0965882	0.620834	0.0707966	0.365916	5.95005	42.8204	0.0832179	0.00864417	124.404	6.62049	2.54473	861.058	3.95505	154.846	13.1134		Lgam359		52.07	0.05	4.74	1.21	2.5	0.06	22.51	10.92	3.43	0.23	97.72
Lgam359	17.3264	60.2424	5.67439	30.482	4.42701	2.00971	3.71842	0.487236	2.44705	0.334512	0.661061	0.136478	0.667775	0.119159	0.243265	8.97107	83.9386	0.0518762	0.0130096	91.6244	3.66728	2.46181	434.935	8.09297	305.69	14.1		Lgam359		52.07	0.05	4.74	1.21	2.5	0.06	22.51	10.92	3.43	0.23	97.72
Lgam213	24.8656	104.644	11.4746	59.9	9.07076	3.63867	9.35201	0.929538	3.55884	0.599045	1.40314	0.135104	0.905	0.171047	0.17386	2.37883	105.892	0.0582009	0.00306203	283.256	4.49044	2.14548	1116.87	2.50079	191.342	22.1301		Lgam213		52.15	0.34	3.6	0.2	6.82	0.12	20.53	8.57	4.79	0.6	97.72
Lgam333	18.6543	60.6403	6.45149	31.4947	5.28601	2.15239	5.02016	0.652931	3.06616	0.520176	1.05955	0.129409	0.688123	0.100123	0.330752	9.24803	49.2245	0.136273	0.00119492	179.002	7.01916	1.51911	485.968	5.66404	223.205	16.6951		Lgam333		52.25	0.1	4.49	1.34	2.93	0.06	22.26	10.17	3.82	0.28	97.7
Lgam264	25.3793	73.577	8.92361	51.3793	8.91159	3.25624	8.47444	1.01441	5.02196	0.947634	2.12429	0.297163	1.68685	0.231674	0.320267	5.68006	65.5628	0.237408	0.014817	189.433	10.8025	2.0772	416.219	11.2815	418.782	28.3146		Lgam264		52.52	0.33	3.79	1.33	2.54	0.04	22.71	9.86	4.13	0.47	97.72
Lam5-69	52.6308	156.574	16.3036	87.7082	9.91105	3.81824	9.51955	0.827671	3.35396	0.476068	1.24495	0.141301	1.06015	0.167305	0.232713	2.74582	110.491	0.151708	0.0162588	269.119	6.74135	1.88044	771.072	3.05496	247.679	26.3601		Lam5-69		52.5228	0.2322	3.6915	1.0057	3.3976	0.0782	22.1609	8.6336	5.1896	0.36	97.2721
Lgam341	15.2589	52.5521	7.10702	38.9388	6.40359	2.80428	6.65539	0.662527	2.44714	0.399096	0.846906	0.137286	0.872716	0.0993031	0.35479	3.1686	57.4178	0.149409	0.00900698	193.636	5.4108	1.72793	816.633	3.57707	271.611	13.584		Lgam341		52.55	0.03	4.63	1.55	2.92	0.06	22.04	9.31	4.37	0.26	97.72
	La	Ce	Pr	Nd	Sm	Eu	Gd	Tb	Dy	Ho	Er	Tm	Yb	Lu	Cs	Rb	Ba	Th	U	Nb	Ta	Pb	Sr	Hf	Zr	Y
Lgam011	359.266	566.905	59.4728	201.421	30.3709	6.6171	24.3584	2.11384	8.97988	1.49999	4.045	0.585207	3.23925	0.472255	2.83139	199.638	1543.91	113.126	12.8789	13.3036	38.0948	12.4148	1229.52	11.7799	1144.37	65.4665		Lgam011		56.57	0.25	0.54	0.02	2.27	0.03	23.09	7.27	4.9	2.82	97.76
Lgam020	14.1367	34.257	5.35533	22.2221	4.39377	1.12132	2.90687	0.321848	1.67193	0.180189	0.424292	0.0696669	0.554076	0.0867401	0.0415336	14.7019	106.448	0.150365	0.000495264	9.34835	5.70819	5.06488	1373.08	9.53874	360.95	8.15142		Lgam020		56.58	0.21	0.44	0.19	1.87	0.02	23.36	6.73	5.77	2.6	97.77
Lgam010	7.91677	18.2336	2.5934	10.5539	2.09226	0.480564	1.19334	0.12178	0.788997	0.0681796	0.268718	0.0464445	0.383591	0.0578268	0.0415336	21.8926	75.5237	0.150365	0.00115284	10.3671	2.56404	2.9527	1604.98	10.1565	379.249	2.6467		Lgam010		56.57	0.23	0.22	0.27	2.42	0.02	23.46	5.7	6.05	2.83	97.77
Lgam045	7.548	14.4048	1.83836	7.45545	1.28524	0.431812	0.948555	0.113081	0.60114	0.0584397	0.127287	0.0232223	0.191795	0.0674646	0.0276891	22.7117	28.201	2.43792	0.295651	6.71162	1.34584	2.37078	1090.68	7.31206	261.458	2.57958		Lgam045		56.61	0.2	0.37	0.43	2.26	0.03	23.63	5.9	6.4	1.94	97.77
Lgam053	25.0117	57.53	7.71533	31.0101	5.4997	1.38599	3.39646	0.434931	1.74707	0.233759	0.565723	0.0761736	0.447523	0.0771024	0.110756	25.0644	157.41	0.852082	0.113481	11.0563	10.0765	6.25031	2493.07	11.2771	599.896	12.5824		Lgam053		56.87	0.19	0.75	0.29	2.05	0.02	23.04	7.47	5.35	1.71	97.74
Lgam039	19.3979	41.3402	6.09	24.8367	4.72256	1.12829	2.81508	0.282704	1.27743	0.170449	0.282861	0.0382335	0.277038	0.0752915	0.539946	38.8472	164.121	2.62032	0.0656995	6.80148	3.34075	7.06934	3376.57	7.77169	270.964	6.78958		Lgam039		56.91	0.14	0.21	0.25	2.09	0.03	23.78	5.99	6.25	2.13	97.78
Lam5-80	8.62676	20.6808	3.04891	12.442	2.51071	0.557176	1.34634	0.12178	0.638711	0.0779196	0.198003	0.0242889	0.362281	0.0915592	0.0830673	27.0136	54.6737	0.0364521	0.000767523	12.1949	2.29274	3.12512	2082.37	11.3633	460.042	3.07823		Lam5-80		56.9589	0.1594	0.2393	0.3867	2.0185	0.0209	23.399	5.779	7.115	1.9166	97.9933
Lgam028	7.99636	16.3751	2.08044	8.08477	1.64391	0.278587	1.16274	0.0782871	0.356926	0.0389598	0.155574	0.102178	0.916368	0.120473	0.0830673	29.2055	38.3883	0.168592	0.026877	8.89893	1.57458	2.19835	1452.65	8.36075	508.34	2.4549		Lgam028		56.98	0.23	0.51	0.02	1.74	0.01	23.45	6.82	5.09	2.33	97.18
Lgam065	94.0723	143.964	17.4713	69.5654	14.9755	6.10852	13.2499	1.60062	8.11585	1.67534	4.85127	0.640946	4.30485	0.65056	1.14219	100.058	3777.93	1.70422	0.0866037	0.958785	0.117027	19.916	7658.04	0.96245	35.6113	73.5418		Lgam065		57.02	0.2	0.95	0.1	2.81	0.02	22.31	7.2	5.31	1.4	97.32
Lgam016	425.891	661.251	63.0636	196.864	25.1688	6.08068	16.8912	1.45271	6.66911	1.07628	2.31949	0.278669	2.04583	0.298773	5.50375	371.619	2499.76	63.0367	11.3812	6.53185	30.6657	11.6389	3678.3	6.10533	434.604	45.9042		Lgam016		56.65	0.25	0.21	0.26	2.5	0.03	23.38	5.68	6.12	2.66	97.74
Lgam317	3.41866	10.5328	1.50184	7.74588	1.76347	0.431811	1.16274	0.139177	0.544783	0.0681796	0.212146	0.0464446	0.255727	0.0578268	0.0899896	25.1552	45.2722	0.113913	0.0298633	6.32208	2.4949	1.81041	967.81	7.77175	251.683	3.0207		Lgam317		56.86	0.05	0.97	0.77	2.87	0.08	23.61	6.44	5.76	0.32
	Garnets
	La	Ce	Pr	Nd	Sm	Eu	Gd	Tb	Dy	Ho	Er	Tm	Yb	Lu	Cs	Rb	Ba	Th	U	Nb	Ta	Pb	Sr	Hf	Zr	Y
LenG-21	0.472028	3.95975	0.93727	11.794	3.23172	0.888053	1.99004	0.25087	1.08209	0.183175	0.607896	0.156888	1.10046	0.285567	0.00253008	0.310803	0.0542178	0.11815	0.127552	0.727453	0.0421267	0.124405	7.48573	0.649226	46.7736	8.28866		LenG-21	G	42.09	0.01	20.83	3.82	6.37	0.3	23.59	2.13	0.03	0		99.17
"Lng76	0.190819	1.86919	0.58033	5.67176	3.88336	2.14322	7.60559	1.71517	11.4635	2.69242	7.61345	1.19516	8.06028	1.23199	0.00506016	0.411604	0.0813266	0.0243801	0.0527795	1.59686	0.195766	0.0130948	10.9937	7.79902	433.018	100.372		"Lng76	G	42.71	0.9	19.41	3.22	8.49	0.3	20.6	4.69	0.08			100.4
lngdG003	0.28623	1.75407	0.62912	4.11125	2.33352	0.678865	1.20328	0.178504	0.756504	0.134971	0.466524	0.0899796	1.17178	0.238365	0.00759024	0.596405	1.00305	0.0693896	0.0948779	0.70971	0.0396487	0.0698394	3.31583	0.347798	28.7962	4.57522		lngdG003	G	42.23	0.05	18.03	6.6	7.66	0.42	21.31	2.86				99.16
lngdG409	0.145625	1.58743	0.493023	4.51637	3.65441	1.42485	3.99555	0.564463	2.4898	0.339839	0.664445	0.0992082	1.02913	0.254886	0.00253008	0.361203	0.0542178	0.02438	0.0376995	1.16216	0.0892096	0.0589266	7.94903	4.52158	243.549	12.4113		lngdG409	G	39.68	0.09	20.84	0.09	28.03	0.86	6.68	2.92				99.19
"Lng58	3.11456	7.55275	0.996417	5.6569	3.1965	1.33801	5.3223	1.14342	7.79533	1.7065	4.4039	0.627562	4.98278	0.767031	0.0177106	0.520806	5.69338	0.148158	0.0376996	2.26229	0.161073	0.163687	7.55199	5.76605	325.842	60.8958		"Lng58	G	42.14	0.99	19.48	2.48	9.82	0.35	19.81	4.74	0.07			99.88
"Lng03	0.175756	1.01486	0.336384	3.79614	3.1965	1.40906	5.55371	1.0035	6.43538	1.30878	3.44957	0.542193	3.5358	0.717468	0.0202407	0.378003	0.108436	0.0243801	0.0238763	0.896012	0.0842535	0.0305547	11.4571	4.45201	254.936	48.5415		"Lng03	G	41.66	0.87	20.74	3.68	8.16	0.31	20.18	4.75	0.08			100.43
LenG1-1	0.230992	1.47837	0.505862	4.26129	3.12605	1.58668	5.67713	1.23992	9.15531	2.16209	5.78949	0.932123	5.91009	0.901561	0.00506016	0.344403	0.0128555	0.0187539	0.023248	0.842782	0.0991218	0.0240071	10.067	5.97475	266.303	77.0015		LenG1-1	G	40.93	0.98	18.38	4.49	8.5	0.26	20.44	5.12	0.1	0.01		99.21
"Lng114	0.00251077	0.0302933	0.061627	1.57545	11.7386	2.99977	26.8768	5.32948	38.8049	10.1913	34.3807	6.01835	44.6655	6.99447	0.00126504	0.294002	0.0121566	0.0054875	0.00125665	0.00089125	0.0123902	0.00654738	6.29443	1.53806	87.107	407.414		"Lng114	G	41.6	0.14	19.3	5.15	8.37	0.48	19.17	5.18	0.05			99.44
"Lng111	0.105452	1.24207	0.351791	3.16594	2.54486	1.21565	4.4738	0.945608	7.68042	1.64624	4.78564	0.64602	5.21716	0.828395	0.00759024	0.520804	0.0135544	0.0225047	0.0263896	0.691968	0.111512	0.0109123	6.49284	4.95443	228.315	56.4713		"Lng111	G	42.16	0.2	19.55	5.28	8.11	0.45	19.2	5.24	0.04			100.23
"Lng112	0.0652801	0.711905	0.215695	2.28066	1.80517	0.832795	3.59444	0.776745	5.98527	1.35458	4.60184	0.729081	5.56362	0.896841	0.00126504	0.487204	0.0153334	0.0131277	0.0226197	0.709711	0.0792974	0.0109123	10.5304	4.45974	232.907	55.52		"Lng112	G	42.92	0	20.72	4.05	7.92	0.43	19.37	5.27	0.02			100.7
"Lng113	0.0200862	0.408963	0.197721	2.58076	2.08696	0.817007	3.10078	0.504156	3.92627	0.79779	2.7356	0.426831	3.66827	0.568779	0.00506016	0.369603	0.0275324	0.0187539	0.00125665	0.0532279	5.1414e-05	0.00654739	7.41951	3.23849	174.468	33.4039		"Lng113	G	41.73	0.98	16.99	6.41	8.3	0.38	19.5	5.33	0.09			99.71
"Lng118	0.200862	1.49958	0.518701	4.3063	2.93232	1.46432	6.00111	1.22786	10.0365	2.26816	6.46111	0.97827	6.78648	1.05733	0.00253008	0.487204	1.97897	0.0300062	0.0333012	0.887139	0.1016	0.037102	6.16193	6.18347	257.885	70.7291		"Lng118	G	42.28	0.18	19.99	4.8	8.33	0.51	19.25	5.33	0.04			100.71
"lngdG4	0.175754	1.39657	0.523837	4.77146	3.07322	1.67351	5.26059	0.996267	6.99087	1.39315	3.95149	0.52835	4.39176	0.649025	0.00759024	0.294003	0.162654	0.0150031	0.0395845	1.57025	0.195766	0.0130948	7.9491	4.98536	218.971	51.1408		"lngdG4	G	41.99	0.03	23.82	0.92	9.58	0.49	17.17	5.39	0			99.39
"Lng115	0.467009	1.96919	0.613713	5.2216	3.44306	1.49984	5.92397	1.20373	9.80659	2.13316	6.27022	0.989807	6.91894	1.10218	0.0253008	0.79801	8.37735	0.129403	0.0301596	1.46379	0.143727	0.19206	15.561	5.56507	277.368	82.8226		"Lng115	G	40.82	0.14	17.79	7.41	7.99	0.52	19.14	5.52	0.06			99.39
"lngdG1	0.195841	1.92069	0.760083	5.64175	3.67202	1.65772	5.10632	1.07105	6.95255	1.52814	4.25546	0.6714	5.00317	0.785913	0.00506016	0.336003	0.0135544	0.0543863	0.0364429	1.40169	0.121424	0.0196422	12.0528	4.19694	213.616	56.959		"lngdG1	G	41.96	0.03	20.58	1.08	10.3	0.6	19.03	5.52	0.02			99.12
lngdG115	0.195841	1.54199	0.382605	3.78114	3.07322	1.47616	4.85948	1.12412	7.02916	1.81256	4.81393	0.678321	5.31906	0.74579	0.00126504	0.319203	0.108436	0.0543863	0.0383279	0.82504	0.0545169	0.0283721	11.6556	4.79984	280.735	65.564		lngdG115	G	41.72	0.03	22.94	1.1	10.06	0.51	17.39	5.53				99.28
