# Supplementary material for: Unique Amphibole Bearing Mantle Column Beneath the Leningrad Kimberlite Pipe, West Ukukit Field, NE Yakutia
Source: Preprints.org preprint supplement (doi:10.20944/preprints202112.0444.v1), 2021-12-28
Supplement: Supplementary file 7 [file SupplementaryFile3 ElectronMicroscopeData.xls]

## Sheet: ConcentrateAmphiboleIntergrowth
	Table 3-1. Composition of amphiboles and associated minerals from Leningrad pipe.
Project	Sample	Site	Spectrum	Mineral	Total	SiO2	TiO2	Al2O3	Cr2O3	FeO	MnO	MgO	CaO	Na2O	K2O	BaO	SrO	CoO	NiO	CuO	ZnO	V2O3	Sc2O3	Ce2O3	La2O3	Pr2O3	Nd2O3	Sm2O3	Eu2O3	Gd2O3	Tb2O3	Ho2O3	Lu2O3	Y2O3	UO2	ZrO2	Ag2O	OsO4	In2O3	SnO2	MoO3	WO3	Re2O7	Nb2O5	Ta2O5	As2O5	P2O5	SO3	Br
Aschepkov_2020_11_02	Sample 5	AmfLeningrad	Spectr 536	0xide_ox O-48	100	58.44		1.83	1.07	2.61		22.44	8.05	4.9	0.66
Aschepkov_2020_11_02	Sample 5	AmfLeningrad	Spectr 537	Amphibole_amp O-23 H=2.0	98	53.62		4.72	1.58	2.67		21.27	10.14	3.69	0.32
Aschepkov_2020_11_02	Sample 5	AmfLeningrad	Spectr 538	Amphibole_amp O-23 H=2.0	98	57.6		1.38	0.81	2.46		22.04	7.8	4.82	1.09
Aschepkov_2020_11_02	Sample 5	AmfLeningrad	Spectr 539	Amphibole_amp O-23 H=2.0	98	48.4		10.4	1.64	2.18		19.52	13.01	2.16	0.52
Aschepkov_2020_11_02	Sample 5	AmfLeningrad	Spectr 540	Pyroxene_px O-6	100	55.93	0.36	2.87	2.53	1.85		14.97	19.05	2.45
Aschepkov_2020_11_02	Sample 5	AmfLeningrad	Spectr 541	Amphibole_amp O-23 H=2.0	100	48.51	0.48	11.16	1.88	2.43		19.57	12.82	2.37	0.61
Aschepkov_2020_11_02	Sample 5	AmfLeningrad	Spectr 542	Amphibole_amp O-23 H=2.0	100	47.78		12.25	1.56	2.92		19.16	13.1	2.46	0.49
Aschepkov_2020_11_02	Sample 5	Site 2	Spectr 543	Amphibole_amp O-23 H=2.0	98	55.64	0.39	2.63		5.73		20.47	8.47	4.08	0.58
Aschepkov_2020_11_02	Sample 5	Site 2	Spectr 544	Amphibole_amp O-23 H=2.0	98	47.48		11.17	1.46	2.91		19.11	12.58	2.5	0.57
Aschepkov_2020_11_02	Sample 5	Site 2	Spectr 545	Amphibole_amp O-23 H=2.0	98	58.67		0.95	0.87	3.03		22.33	6.46	5.36	0.32
Aschepkov_2020_11_02	Sample 5	Site 2	Spectr 546	Amphibole_amp O-23 H=2.0	98	47.47	0.4	11.09	1.83	2.44		19.18	12.63	2.31	0.52
Aschepkov_2020_11_02	Sample 5	Site 2	Spectr 547	Amphibole_amp O-23 H=2.0	100	55.61		4.16	1.52	2.67		21.84	9.91	3.86	0.42
Aschepkov_2020_11_02	Sample 5	Site 2	Spectr 548	Amphibole_amp O-23 H=2.0	100	48.76		10.89	1.92	2.6		19.71	13	2.39	0.55
Aschepkov_2020_11_02	Sample 5	Site 3	Spectr 549	Amphibole_amp O-23 H=2.0	98	52.22	0.46	4.63	0.32	9.23		17.75	8.27	4.64	0.48
Aschepkov_2020_11_02	Sample 5	Site 3	Spectr 550	Amphibole_amp O-23 H=2.0	98	58.91		0.84	0.74	2.97		22.5	6.41	5.33	0.3
Aschepkov_2020_11_02	Sample 5	Site 3	Spectr 551	Amphibole_amp O-23 H=2.0	98	47.94		11.45	1.38	2.34		19.17	12.76	2.15	0.61
Aschepkov_2020_11_02	Sample 5	Site 3	Spectr 552	Amphibole_amp O-23 H=2.0	98	56.69	0.23	1.84	0.83	2.5		21.87	8.91	4.31	0.83
Aschepkov_2020_11_02	Sample 5	Site 3	Spectr 553	Pyroxene_px O-6	100	55.95			0.91	1.97		16.32	24.02	0.84
Aschepkov_2020_11_02	Sample 5	Site 3	Spectr 554	Amphibole_amp O-23 H=2.0	100	49.2		10.67	1.68	2.52		19.61	13.01	2.17	0.9
Aschepkov_2020_11_02	Sample 5	Site 3	Spectr 555	Amphibole_amp O-23 H=2.0	100	48.54	0.52	11.19	1.7	2.63		19.47	13.25	2.19	0.5
Aschepkov_2020_11_02	Sample 5	Site 4	Spectr 556	Amphibole_amp O-23 H=2.0	100	48.36		11.33	1.84	2.53		19.69	13.2	2.33	0.57
Aschepkov_2020_11_02	Sample 5	Site 4	Spectr 557	Apatite	100								52.22	0.38																												0	0				42.19
Aschepkov_2020_11_02	Sample 5	Site 4	Spectr 559	Amphibole_amp O-23 H=2.0	98	48.14		10.89	1.5	2.42		19.15	12.85	2.04	0.82
Aschepkov_2020_11_02	Sample 5	Site 4	Spectr 560	Amphibole_amp O-23 H=2.0	100	55.1		2.51	3.28	3.61		21.57	10.2	3.21	0.52
Aschepkov_2020_11_02	Sample 5	Site 5	Spectr 562	Ilmenite_Ilm O-3	100		54.5	0.32		34.62	0.37	9.75										0.45
Aschepkov_2020_11_02	Sample 5	Site 5	Spectr 563	Spinel_spl O-4	100			30.55	38.85	15.62		13.95	0.22																0.81
Aschepkov_2020_11_02	Sample 5	Site 5	Spectr 564	Amphibole_amp O-23 H=2.0	98	41.9		11.47	8.1	4.78		18.54	10.7	1.93	0.58
Aschepkov_2020_11_02	Sample 5	Site 5	Spectr 565	Amphibole_amp O-23 H=2.0	100	58.7		1	1.9	3.42		22.65	6.46	5.55	0.32
Aschepkov_2020_11_02	Sample 5	Site 5	Spectr 566	Amphibole_amp O-23 H=2.0	100	59.68		1.11	1.27	3.06		22.57	6.59	5.38	0.34
Aschepkov_2020_11_02	Sample 5	Site 5	Spectr 567	Amphibole_amp O-23 H=2.0	98	58.81				2.79		21.93	6.71	5.53	2.22
Aschepkov_2020_11_02	Sample 5	Site 5	Spectr 568	Amphibole_amp O-23 H=2.0	98	57.47	0.23	1.03	0.57	2.21		22.68	7.8	4.59	1.42
Aschepkov_2020_11_02	Sample 5	Site 5	Spectr 570	Sulfite	100					30.39		9.7	13.02																																			46.89
Aschepkov_2020_11_02	Sample 5	Site 5	Spectr 571	Apatite	100			1.63		1.01		6.29	54.21	1.45																																	34.71
Aschepkov_2020_11_02	LenAm2	Site 1	Spectr 572	Amphibole_amp O-23 H=2.0	100	57.15		2.6	1.13	2.63		22.31	9.72	3.92	0.53
Aschepkov_2020_11_02	LenAm2	Site 1	Spectr 573	Amphibole_amp O-23 H=2.0	100	58.19	0.34	1.63	0.92	2.3		22.35	9.18	4.04	1.05
Aschepkov_2020_11_02	LenAm2	Site 1	Spectr 574	Amphibole_amp O-23 H=2.0	98	57.74		1.3	0.78	2.52		22.03	8.68	4.4	0.55
Aschepkov_2020_11_02	LenAm2	Site 1	Spectr 575	Amphibole_amp O-23 H=2.0	98	56.17	0.42	1.97	0.35	4.14		21.29	8.3	4.34	1.01
Aschepkov_2020_11_02	LenAm2	Site 1	Spectr 576	Amphibole_amp O-23 H=2.0	100	57.27	0.5	2.04	0.36	4.24		21.64	8.61	4.3	1.05
Aschepkov_2020_11_02	LenAm2	Site 2	Spectr 577	Amphibole_amp O-23 H=2.0	100	57.25		2.75	1.15	2.42		22.36	10.18	3.49	0.4
Aschepkov_2020_11_02	LenAm2	Site 2	Spectr 578	Amphibole_amp O-23 H=2.0	98	47.44	0.32	11.05	1.74	2.39		19.2	12.91	2.33	0.52
Aschepkov_2020_11_02	LenAm2	Site 2	Spectr 579	Amphibole_amp O-23 H=2.0	98	56.37	0.41	1.91	0.25	4.31		20.91	8.54	4.24	1.06
Aschepkov_2020_11_02	LenAm2	Site 2	Spectr 580	Amphibole_amp O-23 H=2.0	98	56.1	0.39	1.93	0.42	4.16		20.95	8.74	4.33	0.97
Aschepkov_2020_11_02	LenAm2	Site 2	Spectr 581	0xide_ox O-48	100	58.73		1.67	0.75	2.46		22.39	9.07	3.94	0.99
Aschepkov_2020_11_02	LenAm2	Site 3	Spectr 582	0xide_ox O-48	100	57.55		2	1.16	2.98		21.98	8.92	4.69	0.71
Aschepkov_2020_11_02	LenAm2	Site 3	Spectr 583	Amphibole_amp O-23 H=2.0	98	57.42		1.63	1.02	2.22		22.15	8.32	4.55	0.69
Aschepkov_2020_11_02	LenAm2	Site 3	Spectr 584	Chromite_chr O-4	100			5.24	56	30.68		6.53										0.45							1.1
Aschepkov_2020_11_02	LenAm2	Site 4	Spectr 585	Chromite_chr O-4	100	0.3		1.41	61.55	30.01		5.5										0.3							0.93
Aschepkov_2020_11_02	LenAm2	Site 4	Spectr 586	Apatite	100								51.92	0.46																												0	0				42.37
Aschepkov_2020_11_02	LenAm2	Site 6	Spectr 588	Chromite_chr O-4	100			5.41	55.61	30.12		6.92									0.48	0.41							1.06
Aschepkov_2020_11_02	LenAm2	Site 6	Spectr 589	Chromite_chr O-4	100		0.46	2.05	59.5	29.62		6.47	0.23																1.68
Aschepkov_2020_11_02	LenAm2	Site 6	Spectr 590	Cr-Rutile	100		3.75	0.63	10.72	81.36	0.41	1.89										1.24
[truncated: 2 more columns]

## Sheet: XenLn152
	Table 3-2. Composition of minerals from xenolith L152 from Leningrad pipe.
Project	Sample	Site	Spectrum	Mineral	Total	SiO2	TiO2	Al2O3	Cr2O3	FeO	MnO	MgO	CaO	Na2O	K2O	BaO	SrO	CoO	NiO	CuO	ZnO	V2O3	Sc2O3	Ce2O3	La2O3	Pr2O3	Nd2O3	Sm2O3	Eu2O3	Gd2O3	Lu2O3	ThO2	Ga2O3	ZrO2	HfO2	WO3	Re2O7	Nb2O5	P2O5	SO3	Br	Cl	F	B
Aschepkov_2021_03_03	lN1152	Site 1	Spectr 155	0xide_ox O-48	100			41.87	27.83	13.55		16.75
Aschepkov_2021_03_03	lN1152	Site 1	Spectr 157	Calcite_cal O-1 C=44.0	56							2.1	53.9
Aschepkov_2021_03_03	lN1152	Site 1	Spectr 158	Serpentine_Srp O-14 H=12.0	88	41.97		0.69	0.4	6.35		38.27																														0.32
Aschepkov_2021_03_03	lN1152	Site 1	Spectr 159	Serpentine_Srp O-14 H=12.0	88	44.94				4.95		37.91																														0.2
Aschepkov_2021_03_03	lN1152	Site 1	Spectr 160	Olivine	100	40.94				10.68		49.14	0.3						0.54																							0.4
Aschepkov_2021_03_03	lN1152	Site 2	Spectr 161	0xide_ox O-48	100					1.06		3.15				63.76																								32.03
Aschepkov_2021_03_03	lN1152	Site 2	Spectr 162	Chlorite_chl O-14 H=12.0	88	43.27				11.84		24.05	0.56						7.45																				0.51	0.32
Aschepkov_2021_03_03	lN1152	Site 2	Spectr 163	Baryte_brt O-4	100											65.66																								34.34
Aschepkov_2021_03_03	lN1152	Site 3	Spectr 166	0xide_ox O-48	100			41.56	27.7	13.9		16.84
Aschepkov_2021_03_03	lN1152	Site 3	Spectr 168	Calcite_cal O-1 C=44.0	56							2.54	53.46
Aschepkov_2021_03_03	lN1152	Site 6	Spectr 179	Spinel_spl O-4	100			43.66	25.06	12.96		17.79
Aschepkov_2021_03_03	lN1152	Site 6	Spectr 180	Chlorite_chl O-14 H=12.0	88	44.45				9.74		24.27	0.37						9.17
Aschepkov_2021_03_03	lN1152	Site 5	Spectr	Serpentine_Srp O-14 H=12.0	88	43.32				6.82		37.25			0.4																											0.21
Aschepkov_2021_03_03	lN1152	Site 5	Spectr 177	Serpentine_Srp O-14 H=12.0	88	44.35				4.6		38.13							0.5																							0.42
Ashcheepkov_Leningrad_O89	Ln152	Site 5	Spectr 280	Chromite	100	0.93		43.03	24.92	13.24		17.57			0.32
Ashcheepkov_Leningrad_O89	Ln152	Site 1	Spectr 253	0xide_ox O-48	100				8.84	2.81		3.19	24.08			39.01	2.24																			19.64
Ashcheepkov_Leningrad_O89	Ln152	Site 7	Spectr 294	0xide_ox O-48	100	5.9		1.37	1.66	2.25		7.7	21.08	2.64						30.1																27.29
Ashcheepkov_Leningrad_O89	Ln152	Site 4	Spectr 269	0xide_ox O-48	100	9.93						6.67	83.4
Ashcheepkov_Leningrad_O89	Ln152	Site 9	Spectr 303	0xide_ox O-48	100	12.47				1.76		15.48						1.1	32.33																	36.85
Ashcheepkov_Leningrad_O89	Ln152	Site 6	Spectr 288	0xide_ox O-48	100	13.14		1.1	1.95	3.51		18.71	61.6
Ashcheepkov_Leningrad_O89	Ln152	Site 10	Spectr 315	0xide_ox O-48	100	36.91				22.56		37.27							3.26
Ashcheepkov_Leningrad_O89	Ln152	Site 10	Spectr 314	Chlorite_chl O-14 H=12.0	88	37.29	0.96	9.46	0.37	6.74		25.74			7.44
Ashcheepkov_Leningrad_O89	Ln152	Site 9	Spectr 304	Phlogopite_phl O-11 H=4.5	95.5	37.54	1.76	11.38	0.58	9.76		27.71			6.76											0
Ashcheepkov_Leningrad_O89	Ln152	Site 9	Spectr 302	Biotite_bt O-11 H=4.5	95.5	38.96	0.92	11.48	1.15	6.39		26.54		0.53	8.32															1.11								0.1
Ashcheepkov_Leningrad_O89	Ln152	Site 6	Spectr 287	Serpentine_Srp O-14 H=12.0	88	41.42		1.37	0.45	8.32		36.11																										0.33
Ashcheepkov_Leningrad_O89	Ln152	Site 2	Spectr 267	0xide_ox O-48	100	41.84				4.3		40.29	7.33																						6.12			0.12
Ashcheepkov_Leningrad_O89	Ln152	Site 7	Spectr 293	Serpentine_Srp O-14 H=12.0	88	42.07		1.06		9.45		35.02																										0.4
Ashcheepkov_Leningrad_O89	Ln152	Site 10	Spectr 312	Serpentine_Srp O-14 H=12.0	88	42.13		0.79	0.74	5.01		38.93																										0.41
Ashcheepkov_Leningrad_O89	Ln152	Site 8	Spectr 300	Serpentine_Srp O-14 H=12.0	88	42.14		0.82		4.78		39.89																										0.36
Ashcheepkov_Leningrad_O89	Ln152	Site 2	Spectr 262	Serpentine_Srp O-14 H=12.0	88	42.46				5.91		38.7							0.62																			0.3
Ashcheepkov_Leningrad_O89	Ln152	Site 2	Spectr 261	Serpentine_Srp O-14 H=12.0	88	42.96				6.25		37.67	0.2						0.45																			0.47
Ashcheepkov_Leningrad_O89	Ln152	Site 2	Spectr 268	Serpentine_Srp O-14 H=12.0	88	43.77				7.66		36.3																										0.27
Ashcheepkov_Leningrad_O89	Ln152	Site 2	Spectr 257	Serpentine_Srp O-14 H=12.0	88	44.22				5.42		37.61							0.74
Ashcheepkov_Leningrad_O89	Ln152	Site 4	Spectr 272	Chlorite_chl O-14 H=12.0	88	44.93			1.13	8.55		26.16	3.97						3.05																			0.21
Ashcheepkov_Leningrad_O89	Ln152	Site 1	Spectr 251	Chlorite_chl O-14 H=12.0	88	45.01				7.42		34.4	0.27						0.69																			0.22
Ashcheepkov_Leningrad_O89	Ln152	Site 6	Spectr 284	Amphibole_amp O-23 H=2.0	98	45.37		12.99	1.41	2.7		19.24	12.98	2.64	0.37																							0.3
Ashcheepkov_Leningrad_O89	Ln152	Site 5	Spectr 281	Amphibole_amp O-23 H=2.0	98	45.46		12.84	1.34	2.66		19.43	13.19	2.48	0.29																							0.31
Ashcheepkov_Leningrad_O89	Ln152	Site 10	Spectr 313	Amphibole_amp O-23 H=2.0	98	45.72		12.98	1.19	2.54		19.34	12.84	2.63	0.39																							0.36
Ashcheepkov_Leningrad_O89	Ln152	Site 10	Spectr 306	0xide_ox O-48	100	45.74		13.21	1.16	2.59		19.38	14.08	2.77	0.4							0.34																0.33
Ashcheepkov_Leningrad_O89	Ln152	Site 2	Spectr 259	Chlorite_chl O-14 H=12.0	88	46.41				12.36		26.49	0.23						2.52
Ashcheepkov_Leningrad_O89	Ln152	Site 2	Spectr 258	0xide_ox O-48	100	46.63		13.18	1.24	2.65		19.67	13.19	2.69	0.44																							0.3
Ashcheepkov_Leningrad_O89	Ln152	Site 4	Spectr 275	Chlorite_chl O-14 H=12.0	88	46.7				11.34		27.99	0.64						0.9												0.43
Ashcheepkov_Leningrad_O89	Ln152	Site 8	Spectr 297	Chlorite_chl O-14 H=12.0	88	46.72		5.06	1.5	5.38		28.41	0.67		0.26
Ashcheepkov_Leningrad_O89	Ln152	Site 5	Spectr 282	Chlorite_chl O-14 H=12.0	88	46.74		2.91	1.06	6.89		30.4
Ashcheepkov_Leningrad_O89	Ln152	Site 4	Spectr 274	0xide_ox O-48	100	46.92			2.48	16.7		32.29	0.55						0.74																			0.31
Ashcheepkov_Leningrad_O89	Ln152	Site 2	Spectr 263	Chlorite_chl O-14 H=12.0	88	47.06				12.64		26.66	0.38		0.27				1
Ashcheepkov_Leningrad_O89	Ln152	Site 1	Spectr 250	Chlorite_chl O-14 H=12.0	88	47.31				9.55		29.87	0.23						0.86																			0.17
Ashcheepkov_Leningrad_O89	Ln152	Site 1	Spectr 252	Chlorite_chl O-14 H=12.0	88	47.32			0.59	9.46		28.97	0.42		0.17				0.78																			0.3
Ashcheepkov_Leningrad_O89	Ln152	Site 4	Spectr 270	Chlorite_chl O-14 H=12.0	88	47.43				8.54		30.77	0.27						0.98
Ashcheepkov_Leningrad_O89	Ln152	Site 1	Spectr 254	Chlorite_chl O-14 H=12.0	88	48.09			0.67	7.55		30.82	0.67		0.19
Ashcheepkov_Leningrad_O89	Ln152	Site 9	Spectr 305	Chlorite_chl O-14 H=12.0	88	48.78				7.88		29.26	0.58						1.12																			0.39
Ashcheepkov_Leningrad_O89	Ln152	Site 7	Spectr 292	Orthopyroxene	100	49.23		5.6	2.61	5.79		32.58			4.2
Ashcheepkov_Leningrad_O89	Ln152	Site 2	Spectr 266	Orthopyroxene	100	51.47				9.82		38.71
Ashcheepkov_Leningrad_O89	Ln152	Site 8	Spectr 299	Orthopyroxene	100	52.16		5.66	1.88	6.85		32.53	0.92
Ashcheepkov_Leningrad_O89	Ln152	Site 10	Spectr 311	Orthopyroxene	100	52.21		0.87		8.06		29.42							9.43
Ashcheepkov_Leningrad_O89	Ln152	Site 4	Spectr 276	Orthopyroxene	100	52.69				9.59		36.97																										0.75
Ashcheepkov_Leningrad_O89	Ln152	Site 1	Spectr 255	Orthopyroxene	100	52.92				8.34		36.57							1.69																			0.48
Ashcheepkov_Leningrad_O89	Ln152	Site 4	Spectr 273	Orthopyroxene	100	52.97				10.73		29.54	0.55						5.7																			0.51
Ashcheepkov_Leningrad_O89	Ln152	Site 2	Spectr 265	Dolomite_dol O-2 C=47.0	53			4.26	2.14	2.29	0.69	16.55	25.6			0.77	0.7
Ashcheepkov_Leningrad_O89	Ln152	Site 4	Spectr 271	Calcite_cal O-1 C=44.0	56							1.68	54.32
Ashcheepkov_Leningrad_O89	Ln152	Site 5	Spectr 277	Calcite_cal O-1 C=44.0	56							3.4	52.6
Ashcheepkov_Leningrad_O89	Ln152	Site 5	Spectr 278	0xide_ox O-48	100			42.64	26.08	14.23		17.05
Ashcheepkov_Leningrad_O89	Ln152	Site 5	Spectr 279	Calcite_cal O-1 C=44.0	56							1.91	54.09
Ashcheepkov_Leningrad_O89	Ln152	Site 5	Spectr 283	Chromite	100			44.89	24.63	13.06		17.42
Ashcheepkov_Leningrad_O89	Ln152	Site 6	Spectr 285	Calcite_cal O-1 C=44.0	56			0.62				3.65	51.72
Ashcheepkov_Leningrad_O89	Ln152	Site 2	Spectr 260	Chromite	100			44.13	25.13	13.12		17.62
Ashcheepkov_Leningrad_O89	Ln152	Site 7	Spectr 289	Spinel_spl O-4	100			41.04	28.35	13.69		16.92
Ashcheepkov_Leningrad_O89	Ln152	Site 7	Spectr 290	Calcite_cal O-1 C=44.0	56							2.43	53.57
Ashcheepkov_Leningrad_O89	Ln152	Site 7	Spectr 291	Calcite_cal O-1 C=44.0	56							1.42	54.58
Ashcheepkov_Leningrad_O89	Ln152	Site 8	Spectr 295	Spinel_spl O-4	100			39.75	29.52	14.18		16.03									0.22														0.31
Ashcheepkov_Leningrad_O89	Ln152	Site 8	Spectr 296	Calcite_cal O-1 C=44.0	56							1.67	54.33
Ashcheepkov_Leningrad_O89	Ln152	Site 8	Spectr 298	Dolomite_dol O-2 C=47.0	53			2.44	1.34	1.79	0.6	18.08	28.75
Ashcheepkov_Leningrad_O89	Ln152	Site 10	Spectr 307	Dolomite_dol O-2 C=47.0	53					1.05	0.67	18.71	31.07			0.71	0.78
Ashcheepkov_Leningrad_O89	Ln152	Site 10	Spectr 308	Spinel_spl O-4	100			43.11	26.63	13.29		16.97
Ashcheepkov_Leningrad_O89	Ln152	Site 10	Spectr 309	Spinel_spl O-4	100			43.62	25.93	13.4		17.05
Ashcheepkov_Leningrad_O89	Ln152	Site 10	Spectr 310	Calcite_cal O-1 C=44.0	56							1.84	54.16

## Sheet: XenLen121
	Table 3-3. Composition of minerals from xenolith L121 from Leningrad pipe.
Project	Sample	Site	Spectrum	Mineral	Total	SiO2	TiO2	Al2O3	Cr2O3	FeO	MnO	MgO	CaO	Na2O	K2O	BaO	SrO	CoO	NiO	CuO	ZnO	V2O3	Sc2O3	Ce2O3	La2O3	Pr2O3	Nd2O3	Sm2O3	Eu2O3	Gd2O3	Lu2O3	ThO2	Ga2O3	ZrO2	HfO2	WO3	Re2O7	Nb2O5	P2O5	SO3	Br	Cl	F	B
Aschepkov_2021_03_03	Ln121	Site 14	Spectr 145	Chromite	100	0.29	6.49		49.68	30.98		12.04							0.52
Aschepkov_2021_03_03	Ln121	Site 8	Spectr 111	Chromite	100	1.94	6.49	1.57	40.78	36.16		11.21							0.44			0.31							1.09
Aschepkov_2021_03_03	Ln121	Site 5	Spectr 98	Olivine	100	41.16			0.41	6		53.18																														0.25
Aschepkov_2021_03_03	Ln121	Site 3	Spectr 91	Calcite_cal O-1 C=44.0	56					1.55	0.59	4.2	48.99				0.68
Aschepkov_2021_03_03	Ln121	Site 13	Spectr 142	Calcite_cal O-1 C=44.0	56							2.76	53.24
Aschepkov_2021_03_03	Ln121	Site 14	Spectr 144	Calcite_cal O-1 C=44.0	56					0.74	0.47	1.9	52.5																											0.39
Aschepkov_2021_03_03	Ln121	Site 12	Spectr 134	Phhlogopite	88	36.67	1.5	11.4	1.86	4.74		24.14		0.49	7.2
Aschepkov_2021_03_03	Ln121	Site 11	Spectr 130	Phhlogopite	88	33.95	1.34	12.58	2.11	8.08		24.19			5.74
Aschepkov_2021_03_03	Ln121	Site 9	Spectr 116	Phhlogopite	88	32.77	1.45	11.58	1.8	10.13		25.78			4.49
Aschepkov_2021_03_03	Ln121	Site 10	Spectr 122	Phhlogopite	88	35.46	0.58	11.22	1.48	8.82		26.16			4.28
Aschepkov_2021_03_03	Ln121	Site 9	Spectr 113	Garnet_grt O-12	100	41.78		19.64	5.26	7.12	0.46	21.56	4.17
Aschepkov_2021_03_03	Ln121	Site 9	Spectr 115	Garnet_grt O-12	100	42.29		20.24	4.83	6.3		22.48	3.86
Aschepkov_2021_03_03	Ln121	Site 10	Spectr 120	Garnet_grt O-12	100	41.94		19.19	5.92	6.94		20.79	5.22
Aschepkov_2021_03_03	Ln121	Site 11	Spectr 129	Garnet_grt O-12	100	41.72		19.46	5.52	7	0.37	20.52	5.41
Aschepkov_2021_03_03	Ln121	Site 12	Spectr 132	Garnet_grt O-12	100	41.59		19.21	5.75	6.98	0.47	20.68	5.31
Aschepkov_2021_03_03	Ln121	Site 12	Spectr 135	Garnet_grt O-12	100	41.47		19.5	5.61	6.93	0.36	20.89	5.23
Aschepkov_2021_03_03	Ln121	Site 1	Spectr 81	ClinoPyroxene_px O-6	100	55.09		3.25	2.91	2.47		14.71	18.07	3.49
Aschepkov_2021_03_03	Ln121	Site 1	Spectr 83	ClinoPyroxene_px O-6	100	55.23		2.84	2.62	2.55		15.2	18.44	3.12
Aschepkov_2021_03_03	Ln121	Site 1	Spectr 84	ClinoPyroxene_px O-6	100	55.18		2.68	2.42	2.58		15.29	18.88	2.96
Aschepkov_2021_03_03	Ln121	Site 1	Spectr 85	ClinoPyroxene_px O-6	100	54.79		3.03	2.84	2.68		15	18.42	3.25
Aschepkov_2021_03_03	Ln121	Site 7	Spectr 105	ClinoPyroxene_px O-6	100	55.03		2.99	3.01	2.53		14.87	18.05	3.51
Aschepkov_2021_03_03	Ln121	Site 7	Spectr 109	ClinoPyroxene_px O-6	100	54.98		2.93	2.65	2.56		15.36	18.04	3.17									0.32
Aschepkov_2021_03_03	Ln121	Site 10	Spectr 121	Spinel_spl O-4	100		2.9	14.35	45.86	22.43		12.81										0.28							1.09
Aschepkov_2021_03_03	Ln121	Site 12	Spectr 133	Spinel_spl O-4	100		1.26	23.48	41.9	18.57		14.8

## Sheet: XenLen144
	Table 3-4. Composition of minerals from xenolith L144 from Leningrad pipe.
Project	Sample	Site	Spectrum	Mineral	Total	SiO2	TiO2	Al2O3	Cr2O3	FeO	MnO	MgO	CaO	Na2O	K2O	BaO	SrO	CoO	NiO	CuO	ZnO	V2O3	Sc2O3	Ce2O3	La2O3	Pr2O3	Nd2O3	Sm2O3	Eu2O3	Gd2O3	Lu2O3	ThO2	Ga2O3	ZrO2	HfO2	WO3	Re2O7	Nb2O5	P2O5	SO3	Br	Cl	F	B
Aschepkov_2021_03_03	Ln144	Site 2	Spectr 584	Chromite	100			18.12	53.9	16.11		11.86
Aschepkov_2021_03_03	Ln144	Site 1	Spectr 575	Chromite	100			23.2	46.9	17		12.9
Aschepkov_2021_03_03	Ln144	Site 2	Spectr 587	Chromite	100			23.14	46.7	17.71		12.45
Aschepkov_2021_03_03	Ln144	Site 1	Spectr 578	Chromite	100			23.42	46.33	17.12		13.14
Aschepkov_2021_03_03	Ln144	Site 3	Spectr 594	Chromite	100			22.64	47.48	16.81		12.65										0.41
Aschepkov_2021_03_03	Ln144	Site 3	Spectr 597	Chromite	100			25.56	45.59	13.28		15.57
Aschepkov_2021_03_03	Ln144	Site 4	Spectr 603	Chromite	100			22.03	47.8	17.45		12.73
Aschepkov_2021_03_03	Ln144	Site 8	Spectr 615	Chromite	100			22.74	47.69	17.24		12.32
Aschepkov_2021_03_03	Ln144	Site 8	Spectr 618	Chromite	100			22.38	47.46	17.72		12.45
Aschepkov_2021_03_03	Ln144	Site 2	Spectr 588	Garnet_grt O-12	100	41.2		22.59	1.47	9.67	0.66	19.06	5.36
Aschepkov_2021_03_03	Ln144	Site 2	Spectr 592	Nickeline	100				1.01	23.68		2.36	0.2						26.27																					46.46
Aschepkov_2021_03_03	Ln144	Site 1	Spectr 581	Olivine	100	40.91		0.77	0.57	8.15		50.62							0.64																							0.34
Aschepkov_2021_03_03	Ln144	Site 6	Spectr 67	Pyrite	100					41.94		0.68	0.33																											57.05
Aschepkov_2021_03_03	Ln144	Site 6	Spectr 70	Enstatite	100	54.59		1.21		10.32		31.89	0.73						0.74																							0.54
Aschepkov_2021_03_03	Ln144	Site 9	Spectr 624	Enstatite	100	50.96		0.98	2.77	12.64		30.66	0.58		0.33				0.78																							0.29
Aschepkov_2021_03_03	Ln144	Site 2	Spectr 589	Baryte_brt O-4	100								0.53			62.14	2.64																							34.69
Aschepkov_2021_03_03	Ln144	Site 5	Spectr 607	Baryte_brt O-4	100								1.05			60.9	3.88																							34.16
Aschepkov_2021_03_03	Ln144	Site 8	Spectr 617	Baryte_brt O-4	100											63.54	1.67																							34.79
Aschepkov_2021_03_03	Ln144	Site 9	Spectr 620	Baryte_brt O-4	100								0.53			62.14	2.31																							35.02
Aschepkov_2021_03_03	Ln144	Site 5	Spectr 612	Calcite_cal O-1 C=44.0	56					0.97		3.42	51.62
Aschepkov_2021_03_03	Ln144	Site 4	Spectr 604	Calcite_cal O-1 C=44.0	56							1.7	54.3
Aschepkov_2021_03_03	Ln144	Site 8	Spectr 616	Calcite_cal O-1 C=44.0	56					0.39		1.96	53.65
Aschepkov_2021_03_03	Ln144	Site 1	Spectr 576	Phlogopite	88	38.55		12.08	2.05	5.11		27.6	2.41																													0.2
Aschepkov_2021_03_03	Ln144	Site 5	Spectr 608	Garnet_grt O-12	100	41.82		22.47	1.34	9.73		19.31	5.33
Aschepkov_2021_03_03	Ln144	Site 5	Spectr 613	Garnet_grt O-12	100	41.71		22.24	1.64	9.74		19.2	5.47
Aschepkov_2021_03_03	Ln144	Site 3	Spectr 596	Garnet_grt O-12	100	41.4		22.03	1.61	9.67	0.72	19.18	5.4
Aschepkov_2021_03_03	Ln144	Site 3	Spectr 598	Garnet_grt O-12	100	41.19		21.72	2.06	10.26	0.58	18.77	5.42
Aschepkov_2021_03_03	Ln144	Site 3	Spectr 599	Garnet_grt O-12	100	41.52		22.25	1.91	9.5	0.54	18.81	5.46
Aschepkov_2021_03_03	Ln144	Site 4	Spectr 602	Garnet_grt O-12	100	41.52		22.05	1.87	9.34	0.67	19.03	5.52
Aschepkov_2021_03_03	Ln144	Site 8	Spectr 614	Garnet_grt O-12	100	41.54		21.89	1.63	9.69	0.75	19.34	5.16
Aschepkov_2021_03_03	Ln144	Site 8	Spectr 619	Garnet_grt O-12	100	41.66		22.35	1.82	9.25	0.56	18.93	5.43
Aschepkov_2021_03_03	Ln144	Site 9	Spectr 621	Garnet_grt O-12	100	41.29		22.8	1.56	9.95		19.08	5.32
Aschepkov_2021_03_03	Ln144	Site 9	Spectr 625	Garnet_grt O-12	100	41.63		22.46	1.3	9.7	0.68	19.14	5.08

## Sheet: XenLen148
		Table 3-5. Composition of minerals from xenolith L148 from Leningrad pipe.
Project	Sample	Site	Spectrum	Mineral	Total	SiO2	TiO2	Al2O3	Cr2O3	FeO	MnO	MgO	CaO	Na2O	K2O	BaO	SrO	CoO	NiO	CuO	ZnO	V2O3	Sc2O3	Ce2O3	La2O3	Pr2O3	Nd2O3	Sm2O3	Eu2O3	Gd2O3	Lu2O3	ThO2	Ga2O3	ZrO2	HfO2	WO3	Re2O7	Nb2O5	P2O5	SO3	Br	Cl	F	B
Aschepkov_2021_03_03	Ln148	148_1	Spectr 8	Enstatite	100	52.96				10.83		34.29	0.32						1.22																							0.38
Aschepkov_2021_03_03	Ln148	Site 4	Spectr 21	Montichelite	100	31.92		0.44		4.02		29.86	17.21																										16.36			0.2
Aschepkov_2021_03_03	Ln148	Site 5	Spectr 24	Pentlandite	100					27.1		13.46	0.23					3.62	21.36																					34.23
Aschepkov_2021_03_03	Ln148	Site 10	Spectr 46	Pentlandite	100					20.02		6.52						4.33	26.19																					42.93
Aschepkov_2021_03_03	Ln148	Site 8	Spectr 36	Pentlandite	100					22.33		8.36						3.58	26.83																					38.9
Aschepkov_2021_03_03	Ln148	Site 10	Spectr 47	Pentlandite	100				0.99	59.37		3.5	1.41						33.52																					0.87		0.33
Aschepkov_2021_03_03	Ln148	Site 6	Spectr 29	Nickelin	100				0.4	12.07		1.38						1.33	47.92																					36.89
Aschepkov_2021_03_03	Ln148	Site 7	Spectr 32	Chromite	100		0.29	13.12	43.38	27.6		14.39	0.79		0.43
Aschepkov_2021_03_03	Ln148	Site 9	Spectr 41	Chromite	100			11.56	58.71	18.56		11.17
Aschepkov_2021_03_03	Ln148	Site 10	Spectr 49	Chromite	100			12	58.52	17.53		11.95
Aschepkov_2021_03_03	Ln148	148_1	Spectr 2	Chromite	100			12.59	58.32	17.55		11.54						0
Aschepkov_2021_03_03	Ln148	148_1	Spectr 3	Chromite	100			11.54	59.93	16.26	0	12.27
Aschepkov_2021_03_03	Ln148	148_1	Spectr 7	Chromite	100			11.53	58.82	17.48	0	11.87						0
Aschepkov_2021_03_03	Ln148	Site 4	Spectr 19	Chromite	100		0.65	8.3	59.27	20.47		11.3
Aschepkov_2021_03_03	Ln148	Site 6	Spectr 28	Chromite	100			11.71	58.07	19.26		10.95
Aschepkov_2021_03_03	Ln148	Site 7	Spectr 31	Chromite	100			11.91	57.55	21		9.55
Aschepkov_2021_03_03	Ln148	Site 10	Spectr 45	Chromite	100			10.93	57.07	17.94	0.56	13.13			0.37
Aschepkov_2021_03_03	Ln148	Site 8	Spectr 34	Amphibole_amp O-23 H=2.0	98	46.86		10.62	2.15	2.77		20.31	11.49	3.58	0.22
Aschepkov_2021_03_03	Ln148	Site 8	Spectr 38	Amphibole_amp O-23 H=2.0	98	46.6		10.68	2.6	2.67		20.21	11.31	3.72	0.21
Aschepkov_2021_03_03	Ln148	Site 8	Spectr 39	Amphibole_amp O-23 H=2.0	98	46.31		10.6	2.48	3.19		20.29	11.34	3.57	0.23
Aschepkov_2021_03_03	Ln148	Site 9	Spectr 42	Amphibole_amp O-23 H=2.0	98	47.35		10.25	2.2	2.66		20.19	11.42	3.63	0.31
Aschepkov_2021_03_03	Ln148	Site 4	Spectr 22	Apatite_ap O-12	100					0.56			50.9	0.66			3.97							1.44	0.94														41.16			0.38
Aschepkov_2021_03_03	Ln148	Site 5	Spectr 26	Beusite O-8	100					0.62		1.47	48.2	0.56			6.77							0.88															41.13			0.38
Aschepkov_2021_03_03	Ln148	Site 3	Spectr 16	Beusite O-8	100	6.19		0.56		1.17		4.99	44.73	0.57			3.46		0.43					0.82															36.62			0.45
Aschepkov_2021_03_03	Ln148	148_1	Spectr 4	Biotite_bt O-11 H=4.5	95.5	38.54	0.29	14.22	2.23	6.57		25.22		0.91	7.5
Aschepkov_2021_03_03	Ln148	Site 6	Spectr 30	Biotite_bt O-11 H=4.5	95.5	40.2		15.57	1.83	3.28		24.84		1.54	8.24
Aschepkov_2021_03_03	Ln148	Site 9	Spectr 43	Biotite_bt O-11 H=4.5	95.5	39.86	0.46	15.01	2.75	3.13		24.07		1.3	8.92

## Sheet: XenLn151
	Table 3-6. Composition of minerals from xenolith L151 from Leningrad pipe.
Project	Sample	Site	Spectrum	Mineral	Total	SiO2	TiO2	Al2O3	Cr2O3	FeO	MnO	MgO	CaO	Na2O	K2O	BaO	SrO	CoO	NiO	ZnO	V2O3	Sc2O3	Ce2O3	La2O3	Eu2O3	Ho2O3	Ga2O3	ZrO2	Ag2O	OsO4	In2O3	WO3	Re2O7	Nb2O5	P2O5	SO3	Br	Cl
Ashcheepkov_Leningrad_O89	Ln151	Site 2	Spectr 206	Orthopyroxene	100	53.46				13.7		30.65							1.65																			0.54
Ashcheepkov_Leningrad_O89	Ln151	Site 4	Spectr 216	Orthopyroxene	100	52.69			0.28	13.72		30.84	0.53						1.39																			0.54
Ashcheepkov_Leningrad_O89	Ln151	Site 5	Spectr 221	Orthopyroxene	100	52.51				13.7		32.17							1.13																			0.48
Ashcheepkov_Leningrad_O89	Ln151	Site 5	Spectr 222	Orthopyroxene	100	52.52			0.48	14.32		31.34							0.85																			0.5
Ashcheepkov_Leningrad_O89	Ln151	Site 7	Spectr 233	Chromite_chr O-4	100	0.26	1.25	2.16	54.76	28.86		10.58	0.16								0.64				1.32
Ashcheepkov_Leningrad_O89	Ln151	Site 1	Spectr 194	Baryte_brt O-4	100				1.51	0.51						65																				32.98
Ashcheepkov_Leningrad_O89	Ln151	Site 2	Spectr 200	Baryte_brt O-4	100	0.85				0.4						65.46																				33.29
Ashcheepkov_Leningrad_O89	Ln151	Site 4	Spectr 215	Baryte_brt O-4	100											66.14																				33.86
Ashcheepkov_Leningrad_O89	Ln151	Site 3	Spectr 212	Baryte_brt O-4	100											65.95																				34.05
Ashcheepkov_Leningrad_O89	Ln151	Site 2	Spectr 202	Biotite_bt O-11 H=4.5	95.5	42.23	0.63	12.05	0.41	2.92		26.59		0.81	9.35	0.52
Ashcheepkov_Leningrad_O89	Ln151	Site 5	Spectr 218	Biotite_bt O-11 H=4.5	95.5	42.91	0.75	12.12	0.34	2.98		27.15		0.84	8.28																							0.13
Ashcheepkov_Leningrad_O89	Ln151	Site 7	Spectr 231	Biotite_bt O-11 H=4.5	95.5	42.44	0.76	12.04	0.4	2.79		26.58		0.86	9.63
Ashcheepkov_Leningrad_O89	Ln151	Site 9	Spectr 239	Biotite_bt O-11 H=4.5	95.5	42.25	0.59	11.86	0.46	2.85		26.65		0.82	9.25	0.49			0.28
Ashcheepkov_Leningrad_O89	Ln151	Site 1	Spectr 193	Chlorite_chl O-14 H=12.0	88	46.05				12.22		27.73	0.19						1.33																			0.48
Ashcheepkov_Leningrad_O89	Ln151	Site 1	Spectr 197	Chlorite_chl O-14 H=12.0	88	44.81				8.33		33.41							1.14																			0.31
Ashcheepkov_Leningrad_O89	Ln151	Site 1	Spectr 198	Chlorite_chl O-14 H=12.0	88	44.59				8.4		33.41	0.22						1.13																			0.24
Ashcheepkov_Leningrad_O89	Ln151	Site 5	Spectr 219	Chlorite_chl O-14 H=12.0	88	45.73				8.52		32.42	0.24						0.9																			0.19
Ashcheepkov_Leningrad_O89	Ln151	Site 5	Spectr 225	Chlorite_chl O-14 H=12.0	88	42.71	0.56	10.73	0.46	3.31		29.48			0.75
Ashcheepkov_Leningrad_O89	Ln151	Site 8	Spectr 236	Chlorite_chl O-14 H=12.0	88	45.57				11.11		29.18	0.35						1.65																			0.13
Ashcheepkov_Leningrad_O89	Ln151	Site 9	Spectr 243	Chlorite_chl O-14 H=12.0	88	41.31		3.6	0.3	6.43		35.47	0.23		0.66
Ashcheepkov_Leningrad_O89	Ln151	Site 10	Spectr 245	Chlorite_chl O-14 H=12.0	88	38.01	0.69	10.66	0.36	4.4		25.63		0.77	7.49
Ashcheepkov_Leningrad_O89	Ln151	Site 9	Spectr 238	Chromite_chr O-4	100		1.29	1.79	55.62	33.47		6.14									0.51				1.17
Ashcheepkov_Leningrad_O89	Ln151	Site 9	Spectr 241	Chromite_chr O-4	100		1.06	1.83	55.54	33.86		6.82									0.88
Ashcheepkov_Leningrad_O89	Ln151	Site 10	Spectr 247	Chromite_chr O-4	100		1.13	1.86	57.08	33.27		6.08									0.58
Ashcheepkov_Leningrad_O89	Ln151	Site 1	Spectr 191	Dolomite_dol O-2 C=47.0	53					1.21		18.59	32.29			0.91
Ashcheepkov_Leningrad_O89	Ln151	Site 1	Spectr 192	Dolomite_dol O-2 C=47.0	53							19.4	33.6
Ashcheepkov_Leningrad_O89	Ln151	Site 1	Spectr 196	Dolomite_dol O-2 C=47.0	53					0.98		19.45	32.57
Ashcheepkov_Leningrad_O89	Ln151	Site 2	Spectr 201	Dolomite_dol O-2 C=47.0	53					1.2	0.61	18.04	33.16
Ashcheepkov_Leningrad_O89	Ln151	Site 2	Spectr 203	Dolomite_dol O-2 C=47.0	53					0.82		19.12	33.07
Ashcheepkov_Leningrad_O89	Ln151	Site 3	Spectr 210	Dolomite_dol O-2 C=47.0	53					0.76	0.88	17.9	33.46
Ashcheepkov_Leningrad_O89	Ln151	Site 3	Spectr 211	Dolomite_dol O-2 C=47.0	53							19.98	33.02
Ashcheepkov_Leningrad_O89	Ln151	Site 3	Spectr 213	Dolomite_dol O-2 C=47.0	53	1.09				1.56		16.79	31.89			1.66
Ashcheepkov_Leningrad_O89	Ln151	Site 4	Spectr 214	Dolomite_dol O-2 C=47.0	53					1.03		17.97	32.52																			1.48
Ashcheepkov_Leningrad_O89	Ln151	Site 5	Spectr 223	Dolomite_dol O-2 C=47.0	53					1.02	0.45	18.89	30.55			0.8																1.28
Ashcheepkov_Leningrad_O89	Ln151	Site 5	Spectr 224	Dolomite_dol O-2 C=47.0	53							18.24	34.76
Ashcheepkov_Leningrad_O89	Ln151	Site 6	Spectr 228	Dolomite_dol O-2 C=47.0	53					1.34		18.49	33.16
Ashcheepkov_Leningrad_O89	Ln151	Site 6	Spectr 229	Dolomite_dol O-2 C=47.0	53							17.99	35.01
Ashcheepkov_Leningrad_O89	Ln151	Site 6	Spectr 230	Dolomite_dol O-2 C=47.0	53				2.25	2.48		19.59	28.68
Ashcheepkov_Leningrad_O89	Ln151	Site 7	Spectr 234	Dolomite_dol O-2 C=47.0	53					0.92		19.28	32.8																				0
Ashcheepkov_Leningrad_O89	Ln151	Site 8	Spectr 235	Dolomite_dol O-2 C=47.0	53					1.08		18.92	31.96				1.04
Ashcheepkov_Leningrad_O89	Ln151	Site 10	Spectr 244	Dolomite_dol O-2 C=47.0	53					1.17	0.82	17.72	31.11			0.9	1.28
Ashcheepkov_Leningrad_O89	Ln151	Site 10	Spectr 246	Dolomite_dol O-2 C=47.0	53					1.34		18.44	33.22
Ashcheepkov_Leningrad_O89	Ln151	Site 10	Spectr 249	Dolomite_dol O-2 C=47.0	53					0.94	0.74	18.47	31.08			0.92	0.86
Ashcheepkov_Leningrad_O89	Ln151	Site 10	Spectr 248	Rutile_rt O-2	100	0.37	96.07			1.48		0.32	0.94																					0.83
Ashcheepkov_Leningrad_O89	Ln151	Site 2	Spectr 204	Serpentine_Srp O-14 H=12.0	88	44.76				6.87		35.47	0.18						0.46																			0.26
Ashcheepkov_Leningrad_O89	Ln151	Site 2	Spectr 207	Serpentine_Srp O-14 H=12.0	88	42.85				5.37		39.17							0.34																			0.26
Ashcheepkov_Leningrad_O89	Ln151	Site 3	Spectr 208	Serpentine_Srp O-14 H=12.0	88	44.16				4.89		38.79																										0.16
Ashcheepkov_Leningrad_O89	Ln151	Site 3	Spectr 209	Serpentine_Srp O-14 H=12.0	88	43.19				8.88		34.74	0.29						0.57																			0.33
Ashcheepkov_Leningrad_O89	Ln151	Site 4	Spectr 217	Serpentine_Srp O-14 H=12.0	88	44.74				4.91		37.93	0.19																									0.24
Ashcheepkov_Leningrad_O89	Ln151	Site 5	Spectr 220	Serpentine_Srp O-14 H=12.0	88	45.13				6.93		35.62																										0.32
Ashcheepkov_Leningrad_O89	Ln151	Site 7	Spectr 232	Serpentine_Srp O-14 H=12.0	88	45.1				6.98		35.63																										0.29
Ashcheepkov_Leningrad_O89	Ln151	Site 9	Spectr 240	Serpentine_Srp O-14 H=12.0	88	43.07			0.5	6.38		37.86																										0.19

## Sheet: XenLen203
	Table 3-7. Composition of minerals from xenolith L201 from Leningrad pipe.
Project	Sample	Site	Spectrum	Mineral	Total	SiO2	TiO2	Al2O3	Cr2O3	FeO	MnO	MgO	CaO	Na2O	K2O	BaO	SrO	CoO	NiO	ZnO	V2O3	Sc2O3	Ce2O3	La2O3	Eu2O3	Ho2O3	Ga2O3	ZrO2	Ag2O	OsO4	In2O3	WO3	Re2O7	Nb2O5	P2O5	SO3	Br	Cl
Ashcheepkov_Leningrad_O89	len2003	Site 3	Spectr 154	Chromite	100			40.95	28.68	13.81		16.56
Ashcheepkov_Leningrad_O89	len2003	Site 5	Spectr 173	Chromite	100	0.5		43.41	26.17	12.13		17.78
Ashcheepkov_Leningrad_O89	len2003	Site 3	Spectr 156	Orthopyroxene	100	59.23				8.32		29.88			0.24				1.32																			1
Ashcheepkov_Leningrad_O89	len2003	Site 7	Spectr 190	Orthopyroxene	100	54.52				11.45		31.81							2.05																			0.16
Ashcheepkov_Leningrad_O89	len2003	Site 4	Spectr 166	Barite	100											65.09																				34.91
Ashcheepkov_Leningrad_O89	len2003	Site 3	Spectr 158	Barite	100			0.45		1.5		16.53	0.3			57.54																				23.57
Ashcheepkov_Leningrad_O89	len2003	Site 5	Spectr 177	Olivine	100	40.02		0.48	0.35	7.68		50.61							0.5								0											0.36
Ashcheepkov_Leningrad_O89	len2003	Site 2	Spectr 151	Amphibole_amp O-23 H=2.0	98	46.67		11.87	1.38	2.45		19.3	13.25	2.48	0.36																							0.23
Ashcheepkov_Leningrad_O89	len2003	Site 3	Spectr 153	Amphibole_amp O-23 H=2.0	98	46.44		12.35	1.21	2.43		19.47	12.93	2.53	0.36																							0.28
Ashcheepkov_Leningrad_O89	len2003	Site 3	Spectr 155	Amphibole_amp O-23 H=2.0	98	46.16		12.36	1.23	2.44		19.47	13.14	2.52	0.4																							0.28
Ashcheepkov_Leningrad_O89	len2003	Site 4	Spectr 162	Amphibole_amp O-23 H=2.0	100	47.84		11.78	1.49	2.45		19.96	13.48	2.57	0.25																							0.19
Ashcheepkov_Leningrad_O89	len2003	Site 4	Spectr 163	Baryte_brt O-4	100					0.42						62.52	2.64																			34.43
Ashcheepkov_Leningrad_O89	len2003	Site 1	Spectr 144	Beusite O-8	100	4.31				0.72		3.76	48.94	0.48									1.6	1.07									0		38.75			0.36
Ashcheepkov_Leningrad_O89	len2003	Site 1	Spectr 143	Biotite_bt O-11 H=4.5	95.5	37.83	1.96	14.47		5.92		23.42		1.5	7.06	3.35
Ashcheepkov_Leningrad_O89	len2003	Site 1	Spectr 141	Chlorite_chl O-14 H=12.0	88	43.95				9.1		33.6	0.2		0.15				0.74																			0.26
Ashcheepkov_Leningrad_O89	len2003	Site 2	Spectr 148	Chlorite_chl O-14 H=12.0	88	48.66			0.33	9.14		28.36	0.2						1.12																			0.19
Ashcheepkov_Leningrad_O89	len2003	Site 4	Spectr 161	Chlorite_chl O-14 H=12.0	88	50.08		0.66		7.77		26.69	0.28		0.2				2.09																			0.23
Ashcheepkov_Leningrad_O89	len2003	Site 5	Spectr 170	Chlorite_chl O-14 H=12.0	88	44.48				7.73		34.63							0.83																			0.33
Ashcheepkov_Leningrad_O89	len2003	Site 5	Spectr 174	Chlorite_chl O-14 H=12.0	88	52.11		0.95		7.01		26.96			0.32				0.65
Ashcheepkov_Leningrad_O89	len2003	Site 6	Spectr 180	Chlorite_chl O-14 H=12.0	88	47.61				8.31		30.53	0.34						1.05																			0.16
Ashcheepkov_Leningrad_O89	len2003	Site 1	Spectr 140	Dolomite_dol O-2 C=47.0	53					1.09		19.3	32.61
Ashcheepkov_Leningrad_O89	len2003	Site 2	Spectr 150	Dolomite_dol O-2 C=47.0	53					1.36		18.69	32.95
Ashcheepkov_Leningrad_O89	len2003	Site 2	Spectr 152	Dolomite_dol O-2 C=47.0	53	8.91				2.24	0.52	19.73	21.13			0.46
Ashcheepkov_Leningrad_O89	len2003	Site 4	Spectr 164	Dolomite_dol O-2 C=47.0	53				0.87	0.91	0.77	18.37	32.08
Ashcheepkov_Leningrad_O89	len2003	Site 5	Spectr 176	Dolomite_dol O-2 C=47.0	53	1.88				1.4		18.41	31.31
Ashcheepkov_Leningrad_O89	len2003	Site 6	Spectr 184	Dolomite_dol O-2 C=47.0	53					1.01		18.95	33.04
Ashcheepkov_Leningrad_O89	len2003	Site 7	Spectr 189	Dolomite_dol O-2 C=47.0	53					1.22		19.22	32.57
Ashcheepkov_Leningrad_O89	len2003	Site 5	Spectr 171	Pyroxene_px O-6	100	53.24		2.04	0.95	1.38		17.93	24.46	0.45
Ashcheepkov_Leningrad_O89	len2003	Site 5	Spectr 172	Pyroxene_px O-6	100	53.17		1.36	0.86	1.51		17.77	25.32
Ashcheepkov_Leningrad_O89	len2003	Site 6	Spectr 185	Serpentine_Srp O-14 H=12.0	88	42.53				5.79		39.68
Ashcheepkov_Leningrad_O89	len2003	Site 6	Spectr 186	Serpentine_Srp O-14 H=12.0	88	43.02				9.52		34.42	0.19						0.6																			0.25

## Sheet: XenOl112-83
	Table 3-8. Composition of minerals from xenolith OL112-83 from Leningrad pipe.
Project	Sample	Site	Spectrum	Mineral	Total	SiO2	TiO2	Al2O3	Cr2O3	FeO	MnO	MgO	CaO	Na2O	K2O	BaO	SrO	CoO	NiO	ZnO	V2O3	Sc2O3	Ce2O3	La2O3	Eu2O3	Ho2O3	Ga2O3	ZrO2	Ag2O	OsO4	In2O3	WO3	Re2O7	Nb2O5	P2O5	SO3	Br	Cl
Ashcheepkov_Leningrad_O89	Ol112-83	Site 4	Spectr 93	Ortopyroxene	100	54.11		0.89	0.38	11.29		31.93	0.34						0.62																			0.44
Ashcheepkov_Leningrad_O89	Ol112-83	Site 4	Spectr 91	Ortopyroxene	100	52.26			0.46	15.05		30.5							0.73																			1
Ashcheepkov_Leningrad_O89	Ol112-83	Site 4	Spectr 102	Ortopyroxene	100	54.91		0.99	0.55	10.77		31.21	0.21		0.23				0.65																			0.49
Ashcheepkov_Leningrad_O89	Ol112-83	Site 4	Spectr 100	Ortopyroxene	100	54.33				9.81		32.99	0.47		0.26				0.6																	0.75		0.8
Ashcheepkov_Leningrad_O89	Ol112-83	Site 4	Spectr 105	Ortopyroxene	100	54.48		0.98		10.92		32.32							0.8																			0.5
Ashcheepkov_Leningrad_O89	Ol112-83	Site 4	Spectr 95	Barite	100					1.03		2.19				63.06	1.88																			31.85
Ashcheepkov_Leningrad_O89	Ol112-83	Site 4	Spectr 97	0xide_ox O-48	100	58.12				10.6		28.68																										2.59
Ashcheepkov_Leningrad_O89	Ol112-83	Site 5	Spectr 114	0xide_ox O-48	100	53.44		0.88		12.18		32.09							0.88																			0.53
Ashcheepkov_Leningrad_O89	Ol112-83	Site 6	Spectr 118	0xide_ox O-48	100	52.6		0.79		11.72		32.25	0.22						2.12																			0.3
Ashcheepkov_Leningrad_O89	Ol112-83	Site 6	Spectr 121	0xide_ox O-48	100	52.13		0.8		12.17		33.26	0.3		0.28				0.85																			0.21
Ashcheepkov_Leningrad_O89	Ol112-83	Site 4	Spectr 101	Amphibole_amp O-23 H=2.0	98	46.23		11.97	1.71	2.52		19.75	12.76	2.46	0.38																							0.21
Ashcheepkov_Leningrad_O89	Ol112-83	Site 4	Spectr 103	Amphibole_amp O-23 H=2.0	98	46.69		11.65	1.42	2.5		19.55	13.1	2.43	0.42																							0.25
Ashcheepkov_Leningrad_O89	Ol112-83	Site 4	Spectr 107	Amphibole_amp O-23 H=2.0	98	46.34		11.95	1.65	2.47		19.57	12.89	2.56	0.4																							0.18
Ashcheepkov_Leningrad_O89	Ol112-83	Site 4	Spectr 108	Amphibole_amp O-23 H=2.0	98	46.3		12.22	1.41	2.57		19.66	12.48	2.59	0.46																							0.3
Ashcheepkov_Leningrad_O89	Ol112-83	Site 7	Spectr 128	Amphibole_amp O-23 H=2.0	98	46.12		11.74	1.61	2.6		19.57	13.32	2.43	0.41																							0.21
Ashcheepkov_Leningrad_O89	Ol112-83	Site 8	Spectr 132	Amphibole_amp O-23 H=2.0	98	46.95		11.22	1.49	2.55		19.57	13.18	2.51	0.34																							0.19
Ashcheepkov_Leningrad_O89	Ol112-83	Site 4	Spectr 112	Amphibole_amp O-23 H=2.0	98	47.53		12.02	1.47	2.56		19.77	13.45	2.57	0.39																							0.23
Ashcheepkov_Leningrad_O89	Ol112-83	Site 4	Spectr 94	Amphibole_amp O-23 H=2.0	98	48		11.67	1.61	2.47		19.8	13.43	2.51	0.33																							0.17
Ashcheepkov_Leningrad_O89	Ol112-83	Site 4	Spectr 110	Amphibole_amp O-23 H=2.0	98	46.17		10.67	3.24	3.27		18.43	15.46	1.86	0.51																							0.39
Ashcheepkov_Leningrad_O89	Ol112-83	Site 4	Spectr 109	Amphibole_amp O-23 H=2.0	98	45.76	0.23	11.41	4.63	2.71		18.75	13.27	2.5	0.44																							0.31
Ashcheepkov_Leningrad_O89	Ol112-83	Site 2	Spectr 81	Calcite_cal O-1 C=44.0	56								56
Ashcheepkov_Leningrad_O89	Ol112-83	Site 3	Spectr 82	Calcite_cal O-1 C=44.0	56							2.91	52.6				0.49
Ashcheepkov_Leningrad_O89	Ol112-83	Site 1	Spectr 67	Chlorite_chl O-14 H=12.0	88	44.62		0.57		14.59		27.01	0.37		0.25				0.43																			0.16
Ashcheepkov_Leningrad_O89	Ol112-83	Site 1	Spectr 68	Chlorite_chl O-14 H=12.0	88	45.3		0.59		12.99		27.56	0.37		0.17				0.57																			0.43
Ashcheepkov_Leningrad_O89	Ol112-83	Site 1	Spectr 69	Chlorite_chl O-14 H=12.0	88	47.04		0.8		10.07		28.94							0.71																			0.45
Ashcheepkov_Leningrad_O89	Ol112-83	Site 2	Spectr 73	Chlorite_chl O-14 H=12.0	88	44.9		0.63		14.63		27.1	0.25		0.26																							0.23
Ashcheepkov_Leningrad_O89	Ol112-83	Site 2	Spectr 74	Chlorite_chl O-14 H=12.0	88	45.38		0.69		12.54		27.91	0.28		0.26				0.45																			0.49
Ashcheepkov_Leningrad_O89	Ol112-83	Site 2	Spectr 76	Chlorite_chl O-14 H=12.0	88	45.98		0.78		11.72		28.3	0.25		0.18				0.4																			0.39
Ashcheepkov_Leningrad_O89	Ol112-83	Site 2	Spectr 78	Chlorite_chl O-14 H=12.0	88	44.44		0.89		13.14		28.38	0.23		0.25				0.48																			0.2
Ashcheepkov_Leningrad_O89	Ol112-83	Site 2	Spectr 80	Chlorite_chl O-14 H=12.0	88	45.9		0.85		11.75		28.87	0.24		0.23																							0.16
Ashcheepkov_Leningrad_O89	Ol112-83	Site 3	Spectr 83	Chlorite_chl O-14 H=12.0	88	43.66			0.33	12.86		30.3	0.17						0.41																			0.27
Ashcheepkov_Leningrad_O89	Ol112-83	Site 3	Spectr 84	Chlorite_chl O-14 H=12.0	88	44.18			0.76	11.21		30.71	0.49						0.47																			0.18
Ashcheepkov_Leningrad_O89	Ol112-83	Site 4	Spectr 89	Chlorite_chl O-14 H=12.0	88	42.72		3.96	2.15	9.73		28.8	0.31		0.15																							0.19
Ashcheepkov_Leningrad_O89	Ol112-83	Site 4	Spectr 90	Chlorite_chl O-14 H=12.0	88	40.71		6.53	3.23	7.47		29.38	0.37																									0.31
Ashcheepkov_Leningrad_O89	Ol112-83	Site 4	Spectr 99	Chlorite_chl O-14 H=12.0	88	45.97		0.61		8.31		32.11	0.15						0.73																			0.13
Ashcheepkov_Leningrad_O89	Ol112-83	Site 6	Spectr 119	Chlorite_chl O-14 H=12.0	88	45.5		0.75		11.58		28.79	0.21		0.25				0.73																			0.19
Ashcheepkov_Leningrad_O89	Ol112-83	Site 7	Spectr 126	Chlorite_chl O-14 H=12.0	88	45.73		0.66		10.83		30.25	0.31		0.22
Ashcheepkov_Leningrad_O89	Ol112-83	Site 7	Spectr 127	Chlorite_chl O-14 H=12.0	88	45.31		0.75	0.34	12.45		27.88	0.22		0.16				0.49																			0.39
Ashcheepkov_Leningrad_O89	Ol112-83	Site 4	Spectr 111	Dolomite_dol O-2 C=47.0	53					0.98	0.76	16.38	34.88
Ashcheepkov_Leningrad_O89	Ol112-83	Site 2	Spectr 72	Spinel_spl O-4	100	3.31		25.79	38.04	15.7		16.14			0.15										0.86
Ashcheepkov_Leningrad_O89	Ol112-83	Site 3	Spectr 88	Spinel_spl O-4	100			32.05	37.48	15.75		14.72
Ashcheepkov_Leningrad_O89	Ol112-83	Site 4	Spectr 106	Spinel_spl O-4	100			37.41	32.01	14.37		16.21
Ashcheepkov_Leningrad_O89	Ol112-83	Site 7	Spectr 129	Spinel_spl O-4	100			32.85	36.74	16.08		14.33
Ashcheepkov_Leningrad_O89	Ol112-83	Site 4	Spectr 96	Spinel_spl O-4	100			33.35	35.45	15.49		14.81													0.91
Ashcheepkov_Leningrad_O89	Ol112-83	Site 3	Spectr 87	Spinel_spl O-4	100			33.03	35.47	15.71		14.67									0.34				0.78
Ashcheepkov_Leningrad_O89	Ol112-83	Site 4	Spectr 104	0xide_ox O-48	100																																	100

## Sheet: XenOl89-1
	Table 3-9. Composition of minerals from xenolith OL89-1 from Leningrad pipe.
Project	Sample	Site	Spectrum	Mineral	Total	SiO2	TiO2	Al2O3	Cr2O3	FeO	MnO	MgO	CaO	Na2O	K2O	BaO	SrO	CoO	NiO	ZnO	V2O3	Sc2O3	Ce2O3	La2O3	Eu2O3	Ho2O3	Ga2O3	ZrO2	Ag2O	OsO4	In2O3	WO3	Re2O7	Nb2O5	P2O5	SO3	Br	Cl
Ashcheepkov_Leningrad_O89	ol89-1	Site 4	Spectr 34	Orthopyroxene	100	52.7		1.12	0.29	12.76		31.47	0.53						0.71																			0.42
Ashcheepkov_Leningrad_O89	ol89-1	Site 7	Spectr 59	Orthopyroxene	100	53.93				10.22		33.96	0.64						0.67																			0.57
Ashcheepkov_Leningrad_O89	ol89-1	Site 7	Spectr 65	Nickeline	100					26.43		3.03	0.86						24.97																	44.3		0.4
Ashcheepkov_Leningrad_O89	ol89-1	Site 7	Spectr 2	Amphibole_amp O-23 H=2.0	98	45.54		11.72	2.79	2.71		19.12	12.96	2.42	0.54																							0.2
Ashcheepkov_Leningrad_O89	ol89-1	Site 3	Spectr 15	Amphibole_amp O-23 H=2.0	98	46.07		12.03	1.49	2.81		19.18	13.16	2.49	0.56																							0.21
Ashcheepkov_Leningrad_O89	ol89-1	Site 3	Spectr 16	Amphibole_amp O-23 H=2.0	98	46.26		11.81	1.43	2.76		19.31	13.22	2.48	0.55																							0.19
Ashcheepkov_Leningrad_O89	ol89-1	Site 3	Spectr 17	Amphibole_amp O-23 H=2.0	98	45.95		12	1.54	2.69		19.91	12.49	2.73	0.51																							0.16
Ashcheepkov_Leningrad_O89	ol89-1	Site 3	Spectr 8	Amphibole_amp O-23 H=2.0	98	46.35		11.89	1.49	2.7		19.52	12.98	2.39	0.51																							0.16
Ashcheepkov_Leningrad_O89	ol89-1	Site 3	Spectr 9	Amphibole_amp O-23 H=2.0	98	45.88		11.99	1.5	2.78		19.63	13.16	2.44	0.51																							0.1
Ashcheepkov_Leningrad_O89	ol89-1	Site 4	Spectr 19	Amphibole_amp O-23 H=2.0	98	46.03		12.07	1.54	2.75		19.12	12.96	2.73	0.55																							0.26
Ashcheepkov_Leningrad_O89	ol89-1	Site 4	Spectr 28	Amphibole_amp O-23 H=2.0	98	45.97		11.87	1.62	2.54		19.48	13.1	2.61	0.63																							0.19
Ashcheepkov_Leningrad_O89	ol89-1	Site 4	Spectr 32	Amphibole_amp O-23 H=2.0	98	46.42		11.54	1.59	2.84		19.41	13.03	2.5	0.52																							0.15
Ashcheepkov_Leningrad_O89	ol89-1	Site 6	Spectr 49	Amphibole_amp O-23 H=2.0	98	46.31		11.8	1.4	2.71		19.29	13.25	2.49	0.57																							0.17
Ashcheepkov_Leningrad_O89	ol89-1	Site 6	Spectr 54	Amphibole_amp O-23 H=2.0	98	46.24		11.82	1.57	2.69		19.41	13.1	2.46	0.53																							0.18
Ashcheepkov_Leningrad_O89	ol89-1	Site 4	Spectr 31	Biotite_bt O-11 H=4.5	95.5	40.27	2.28	12.52	1.1	4.78		23.75	0.88		9.93
Ashcheepkov_Leningrad_O89	ol89-1	Site 4	Spectr 37	Biotite_bt O-11 H=4.5	95.5	36.8	2.05	16.96		8.16		22.02			8.74	0.77
Ashcheepkov_Leningrad_O89	ol89-1	Site 4	Spectr 30	Calcite_cal O-1 C=44.0	56	1.29			0.73			1.68	52.02		0.29
Ashcheepkov_Leningrad_O89	ol89-1	Site 4	Spectr 22	Chlorite_chl O-14 H=12.0	88	45.22		0.64		7.67		33.14	0.41						0.63																			0.29
Ashcheepkov_Leningrad_O89	ol89-1	Site 4	Spectr 25	Chlorite_chl O-14 H=12.0	88	45.76		0.42		7.96		32.31	0.41		0.14				0.66																			0.32
Ashcheepkov_Leningrad_O89	ol89-1	Site 6	Spectr 48	Chlorite_chl O-14 H=12.0	88	47.03		0.99		9.79		28.13	0.52		0.15				0.88																			0.5
Ashcheepkov_Leningrad_O89	ol89-1	Site 6	Spectr 55	Chlorite_chl O-14 H=12.0	88	46.62		0.43		10.23		29.16	0.44		0.17				0.48																			0.47
Ashcheepkov_Leningrad_O89	ol89-1	Site 6	Spectr 56	Chlorite_chl O-14 H=12.0	88	45.5				6.3		35.6	0.38																									0.22
Ashcheepkov_Leningrad_O89	ol89-1	Site 6	Spectr 57	Chlorite_chl O-14 H=12.0	88	47.39		0.65		7.45		30.61	0.9		0.21				0.5																			0.28
Ashcheepkov_Leningrad_O89	ol89-1	Site 7	Spectr 60	Chlorite_chl O-14 H=12.0	88	46.84		0.43		11.26		28.07	0.41						0.67																			0.33
Ashcheepkov_Leningrad_O89	ol89-1	Site 8	Spectr 63	Chlorite_chl O-14 H=12.0	88	47.77		0.81		9.51		28.87	0.81																									0.23
Ashcheepkov_Leningrad_O89	ol89-1	ol89-1	Spectr 3	Dolomite_dol O-2 C=47.0	53					0.91	0.8	17.22	33.07			0.46	0.55
Ashcheepkov_Leningrad_O89	ol89-1	Site 3	Spectr 12	Dolomite_dol O-2 C=47.0	53					0.96	0.8	17.36	33.24				0.62
Ashcheepkov_Leningrad_O89	ol89-1	Site 4	Spectr 21	Dolomite_dol O-2 C=47.0	53					0.82	0.7	17.52	32.69	0.46			0.81
Ashcheepkov_Leningrad_O89	ol89-1	Site 4	Spectr 36	Dolomite_dol O-2 C=47.0	53	1.1			7.65	0.92	0.57	15.36	27.4
Ashcheepkov_Leningrad_O89	ol89-1	Site 6	Spectr 46	Pyroxene_px O-6	100	50.9	0.85	1.32		14.5	0.47	13.85	18.11
Ashcheepkov_Leningrad_O89	ol89-1	Site 4	Spectr 26	Serpentine_Srp O-14 H=12.0	88	43.71				3.87		40.25	0.17
Ashcheepkov_Leningrad_O89	ol89-1	Site 6	Spectr 52	Serpentine_Srp O-14 H=12.0	88	41.72				4.75		37.98	0.24						1.25																	2.07
Ashcheepkov_Leningrad_O89	ol89-1	Site 3	Spectr 10	Spinel_spl O-4	100			32.08	37.62	15.1		15.19
Ashcheepkov_Leningrad_O89	ol89-1	Site 3	Spectr 11	Spinel_spl O-4	100	7.56		26	32.66	13.34		20.44
Ashcheepkov_Leningrad_O89	ol89-1	Site 3	Spectr 13	Spinel_spl O-4	100	0.74		22.93	41.52	20.65		14.16
Ashcheepkov_Leningrad_O89	ol89-1	Site 4	Spectr 29	Spinel_spl O-4	100			29.39	39.59	17.23		13.78
Ashcheepkov_Leningrad_O89	ol89-1	Site 6	Spectr 50	Spinel_spl O-4	100			29.91	39.24	14.73		16.11
Ashcheepkov_Leningrad_O89	ol89-1	Site 6	Spectr 51	Spinel_spl O-4	100			32.19	37.13	15.85		14.83
Ashcheepkov_Leningrad_O89	ol89-1	Site 6	Spectr 53	Spinel_spl O-4	100			30.54	38.35	16.68		14.43
Ashcheepkov_Leningrad_O89	ol89-1	Site 7	Spectr 58	Spinel_spl O-4	100			31.05	37.92	16.86		14.17
Ashcheepkov_Leningrad_O89	ol89-1	Site 4	Spectr 18	Chromite	100			30.45	38.86	15.47		15.22

## Sheet: LenXen210
	Table 3-10. Composition of minerals from xenolith L201 from Leningrad pipe.
Project	Sample	Site	Spectrum	Mineral	Total	SiO2	TiO2	Al2O3	Cr2O3	FeO	MnO	MgO	CaO	Na2O	K2O	BaO	SrO	CoO	NiO	ZnO	V2O3	Sc2O3	Ce2O3	La2O3	Eu2O3	Ho2O3	Ga2O3	ZrO2	Ag2O	OsO4	In2O3	WO3	Re2O7	Nb2O5	P2O5	SO3	Br	Cl
Ashcheepkov_Leningrad_O89	Ln210	Site 1	Spectr 329	Orthopyroxene	100	58.87		2.23		9.7		28.14	0.62		0.43
Ashcheepkov_Leningrad_O89	Ln210	Site 1	Spectr 331	0xide_ox O-48	100	47.83		2.12	0.85	7.44		40.94	0.31																									0.51
Ashcheepkov_Leningrad_O89	Ln210	Site 2	Spectr 336	Olivine	100	40.82		0.09		9.38		48.24	0.38						0.84																			0.43
Ashcheepkov_Leningrad_O89	Ln210	Site 2	Spectr 337	0xide_ox O-48	100	37.2			4.63	22.58		31.7	0.63		0.35				2.3																			0.62
Ashcheepkov_Leningrad_O89	Ln210	Site 2	Spectr 341	Nickeline	100					39.94		0.61	1.18						20.55																	37.72
Ashcheepkov_Leningrad_O89	Ln210	Site 3	Spectr 347	Orthopyroxene	100	53.01		1.33		13.2		30.51	0.46						0.92																			0.57
Ashcheepkov_Leningrad_O89	Ln210	Site 5	Spectr 360	Orthopyroxene	100	53.45		1.18		13.58		29.62	0.59						1.24																			0.33
Ashcheepkov_Leningrad_O89	Ln210	Site 1	Spectr 322	Amphibole_amp O-23 H=2.0	98	45.97		12.35	1.51	2.55		19.38	12.92	2.28	0.76																							0.28
Ashcheepkov_Leningrad_O89	Ln210	Site 1	Spectr 324	Amphibole_amp O-23 H=2.0	98	46.21		11.86	1.84	2.54		19.15	13.16	2.19	0.77																							0.29
Ashcheepkov_Leningrad_O89	Ln210	Site 1	Spectr 328	Amphibole_amp O-23 H=2.0	98	46.22		11.67	1.67	2.39		19.31	13.33	2.31	0.87																							0.23
Ashcheepkov_Leningrad_O89	Ln210	Site 3	Spectr 344	Amphibole_amp O-23 H=2.0	98	46.29		12.05	1.54	2.4		19.33	13.1	2.25	0.75																							0.28
Ashcheepkov_Leningrad_O89	Ln210	Site 3	Spectr 345	Amphibole_amp O-23 H=2.0	98	46.09		12.03	1.56	2.46		19.36	13.16	2.18	0.85																							0.31
Ashcheepkov_Leningrad_O89	Ln210	Site 3	Spectr 346	Amphibole_amp O-23 H=2.0	98	46.12		12.01	1.57	2.59		19.3	13.06	2.25	0.85																							0.25
Ashcheepkov_Leningrad_O89	Ln210	Site 4	Spectr 354	Amphibole_amp O-23 H=2.0	98	45.46		11.94	2.75	2.44		19.02	12.88	2.39	0.79																							0.32
Ashcheepkov_Leningrad_O89	Ln210	Site 4	Spectr 357	Amphibole_amp O-23 H=2.0	98	46.25		11.78	1.43	2.56		19.47	13.25	2.19	0.79																							0.29
Ashcheepkov_Leningrad_O89	Ln210	Site 5	Spectr 359	Amphibole_amp O-23 H=2.0	98	46.24		11.79	1.61	2.55		19.4	13.11	2.15	0.86																							0.29
Ashcheepkov_Leningrad_O89	Ln210	Site 5	Spectr 363	Amphibole_amp O-23 H=2.0	98	46.24		12.03	1.89	2.38		19.32	12.9	2.21	0.83																							0.21
Ashcheepkov_Leningrad_O89	Ln210	Site 6	Spectr 367	Amphibole_amp O-23 H=2.0	98	45.72		12.01	1.7	2.64		19.21	13.5	2.22	0.75																							0.25
Ashcheepkov_Leningrad_O89	Ln210	Site 1	Spectr 326	Amphibole_amp O-23 H=2.0	98	46.68		12.59	1.49	2.61		19.62	13.54	2.27	0.86																							0.33
Ashcheepkov_Leningrad_O89	Ln210	Site 1	Spectr 325	Chlorite_chl O-14 H=12.0	88	48.14		3.96	0.73	4.66		29.45	0.72		0.34
Ashcheepkov_Leningrad_O89	Ln210	Site 2	Spectr 340	Chlorite_chl O-14 H=12.0	88	34.89		7.28	6.76	7.57		30.41	0.29						0.57																			0.24
Ashcheepkov_Leningrad_O89	Ln210	Site 3	Spectr 348	Chlorite_chl O-14 H=12.0	88	45.19				6.58		35.34							0.66																			0.22
Ashcheepkov_Leningrad_O89	Ln210	Site 3	Spectr 349	Chlorite_chl O-14 H=12.0	88	32.13		10.39	1.25	13.94		26.62			2.74	0.63			0.29
Ashcheepkov_Leningrad_O89	Ln210	Site 4	Spectr 355	Chlorite_chl O-14 H=12.0	88	34.6		10.08	1.06	10.14		28.21			3.48				0.42
Ashcheepkov_Leningrad_O89	Ln210	Site 4	Spectr 356	Chlorite_chl O-14 H=12.0	88	35		7.07	0.68	10.82		26.58			2.93								1.93	1.03											1.96
Ashcheepkov_Leningrad_O89	Ln210	Site 6	Spectr 368	Chlorite_chl O-14 H=12.0	88	46.24		1.34		9.53		28.89	0.53		0.35				0.9																			0.22
Ashcheepkov_Leningrad_O89	Ln210	Site 1	Spectr 323	Serpentine_Srp O-14 H=12.0	88	40.55		1.45	0.5	9.43		35.69																										0.39
Ashcheepkov_Leningrad_O89	Ln210	Site 1	Spectr 327	Serpentine_Srp O-14 H=12.0	88	41.74		1.45	0.72	4.26		39.2	0.24																									0.38
Ashcheepkov_Leningrad_O89	Ln210	Site 1	Spectr 330	Serpentine_Srp O-14 H=12.0	88	40.87		0.66	0.52	5.56		38.67	1.29																									0.43
Ashcheepkov_Leningrad_O89	Ln210	Site 2	Spectr 334	Serpentine_Srp O-14 H=12.0	88	42.02				6		39.53																										0.44
Ashcheepkov_Leningrad_O89	Ln210	Site 2	Spectr 338	Serpentine_Srp O-14 H=12.0	88	43.75				4.63		39.62
Ashcheepkov_Leningrad_O89	Ln210	Site 2	Spectr 339	Serpentine_Srp O-14 H=12.0	88	42.28				4.18		41.11																										0.43
Ashcheepkov_Leningrad_O89	Ln210	Site 3	Spectr 343	Serpentine_Srp O-14 H=12.0	88	42.17				8.07		36.76							0.53																			0.47
Ashcheepkov_Leningrad_O89	Ln210	Site 3	Spectr 350	Serpentine_Srp O-14 H=12.0	88	40.99		1.24	0.94	6.69		37.56																										0.58
Ashcheepkov_Leningrad_O89	Ln210	Site 3	Spectr 351	Serpentine_Srp O-14 H=12.0	88	41.01		0.88	1.11	5.54		38.95																										0.51
Ashcheepkov_Leningrad_O89	Ln210	Site 1	Spectr 321	Spinel_spl O-4	100			37.28	32.7	13.94		15.71			0.17																							0.2
Ashcheepkov_Leningrad_O89	Ln210	Site 2	Spectr 333	Spinel_spl O-4	100	10.07		27.96	26.71	13.53		21.73
Ashcheepkov_Leningrad_O89	Ln210	Site 3	Spectr 342	Spinel_spl O-4	100			34.85	34.94	15.42		14.8
Ashcheepkov_Leningrad_O89	Ln210	Site 6	Spectr 366	Spinel_spl O-4	100			32.23	37.49	15.8		14.48
Ashcheepkov_Leningrad_O89	Ln210	Site 4	Spectr 352	Chromite	100			26.84	43.11	18.65		11.16	0.23

[truncated: 4 more sheets: Len269Kimb, KimbLenSAmKmk203, KimbLorik, SulfidesFormula NOx]
